# Supplementary material for: Large-scale pathway specific polygenic risk and transcriptomic community network analysis identifies novel functional pathways in Parkinson disease
Source: Acta Neuropathol. 2020 Jun 29;140(3):341–58. doi: 10.1007/s00401-020-02181-3 (PMC8096770; doi:10.1007/s00401-020-02181-3)
Supplement: Supplementary file 1 — Supplementary material 1 (PDF 8915 kb) [file 401_2020_2181_MOESM1_ESM.pdf]

## **Supplementary material**

### **Large-scale pathway specific polygenic risk and transcriptomic community network analysis identifies novel functional pathways in Parkinson disease**

Bandres-Ciga S<sup>1\*</sup>, Saez-Atienzar S<sup>2\*</sup>, Kim JJ<sup>1</sup>, Makarious MB<sup>1</sup>, Faghri F<sup>1</sup>, Diez-Fairen M<sup>3</sup>, Iwaki H<sup>1</sup>, Leonard H<sup>1</sup>, Botia J<sup>4,5</sup>, Ryten M<sup>6</sup>, Hernandez D<sup>1</sup>, Gibbs JR<sup>1</sup>, Ding J<sup>1</sup>, Gan-Or Z<sup>7</sup>, Noyce A<sup>8</sup>, Pihlstrom L<sup>9</sup>, Torkamani A<sup>10</sup>, Soltis AR<sup>12</sup>, Dalgard CL<sup>11,12</sup>, The American Genome Center, Scholz SW<sup>13,14</sup>, Traynor BJ<sup>2,14</sup>, Ehrlich D<sup>15</sup>, Scherzer CR<sup>16</sup>, Bookman M<sup>17</sup>, Cookson M<sup>18</sup>, Blauwendraat C<sup>1</sup>, Nalls MA<sup>1,19</sup>, Singleton AB<sup>1</sup>, on behalf of the International Parkinson Disease Genomics Consortium.

\* Equal contribution

|                                                                                                                                                                     |     |
|---------------------------------------------------------------------------------------------------------------------------------------------------------------------|-----|
| <b>Figure S1.</b> Canonical Pathways associated with PD risk clustered in hierarchies according to genetic redundancy.....                                          | 3   |
| <b>Figure S2.</b> Canonical Pathways associated with PD risk clustered in hierarchies according to published literature and public curated databases.....           | 4   |
| <b>Figure S3.</b> Uniform Manifold Approximation and Projection for Dimension Reduction Analysis.....                                                               | 5   |
| <b>Figure S4.</b> Distribution of transcriptomic community networks according to Louvain cluster detection.....                                                     | 6   |
| <b>Table S1.</b> Demographic and clinical characteristics of the GWAS cohorts under study.....                                                                      | 7   |
| <b>Table S2.</b> Demographic and clinical characteristics of the WGS cohorts under study.....                                                                       | 8   |
| <b>Table S3.</b> Canonical pathways significantly associated with PD risk in the <i>discovery phase</i> .....                                                       | 9   |
| <b>Table S4.</b> SNPs within 90 risk loci and 1 Mb upstream and downstream from the GWAS signal.....                                                                | 15  |
| <b>Table S5.</b> Gene prioritization based on pleiotropy across significant gene-sets associated with Parkinson's disease.....                                      | 264 |
| <b>Table S6.</b> Canonical pathways significantly associated with PD risk through rare variation excluding PD known risk loci +/- 1Mb upstream and downstream ..... | 265 |
| <b>Table S7.</b> Gene prioritization per functionality category based on Sequence Kernel Association Test analysis.....                                             | 266 |
| <b>Table S8.</b> Genes within expression community maps and modularity ranges.....                                                                                  | 334 |
| <b>Table S9.</b> Functional enrichment analysis of network community maps.....                                                                                      | 530 |
| <b>Table S10.</b> Cell types significantly associated with PD etiology based on expression specificity enrichment analyses.....                                     | 531 |
| <b>Table S11.</b> Functional enrichment for expression QTL across pathways significantly associated with PD risk.....                                               | 532 |
| <b>Table S12.</b> Functional associations for genes within significant pathways associated with PD risk by SMR .....                                                | 533 |
| <b>Table S13.</b> Genes showing functional inferences through two sample Mendelian randomization and functional consequence in the transcriptome communities.....   | 651 |
| <b>IPDGC and TAGC Consortia members</b> .....                                                                                                                       | 652 |

**Supplementary Figure 1. Canonical Pathways associated with PD risk clustered in hierarchies according to genetic redundancy**

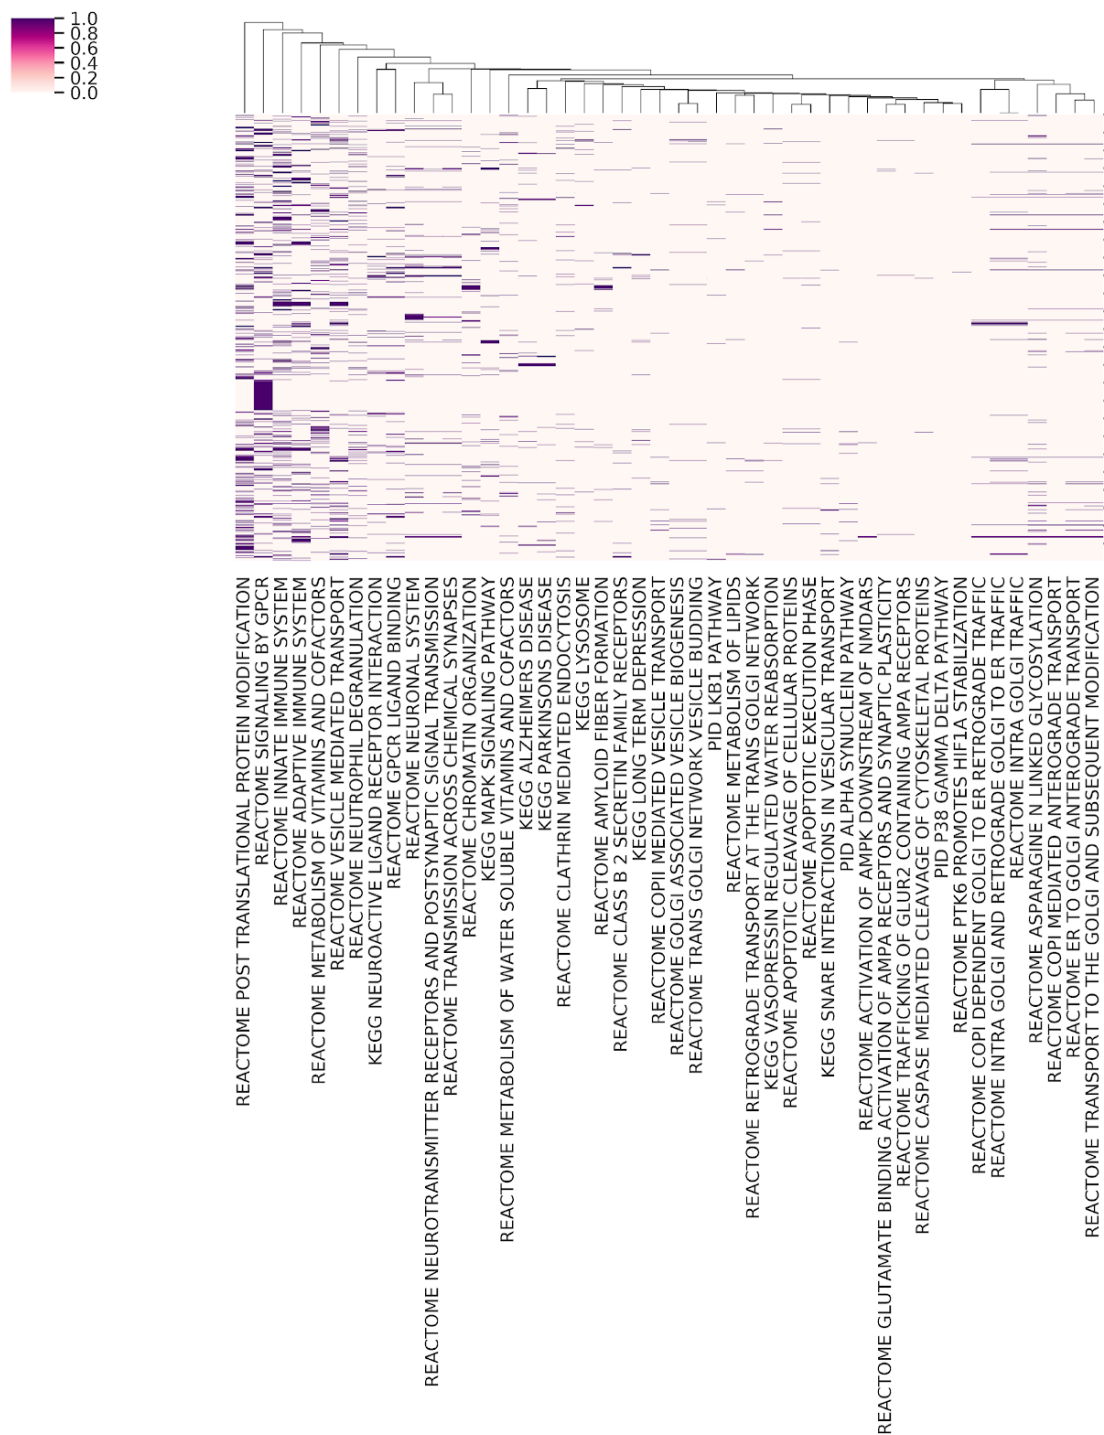

## Supplementary Figure 2. Canonical Pathways associated with PD risk clustered in hierarchies according to published literature and public curated databases

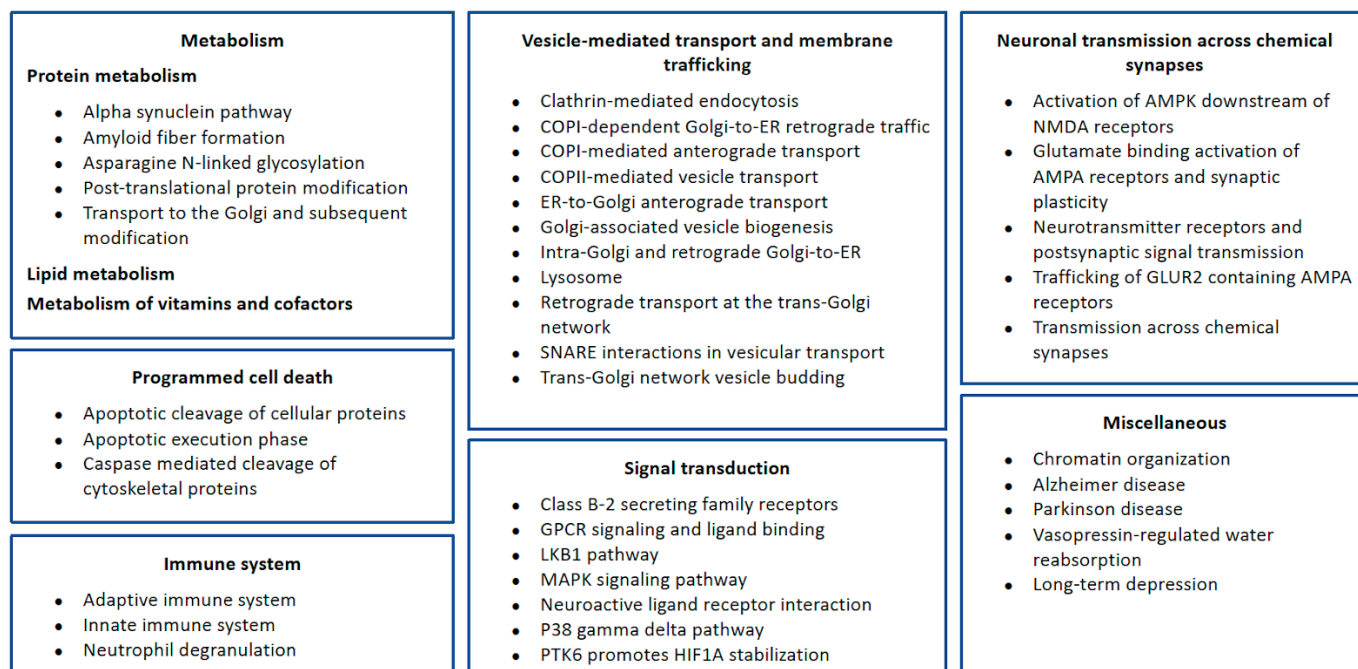

**Supplementary Figure 3. Uniform Manifold Approximation and Projection for Dimension Reduction Analysis to explore etiological subtypes of disease**

**a**

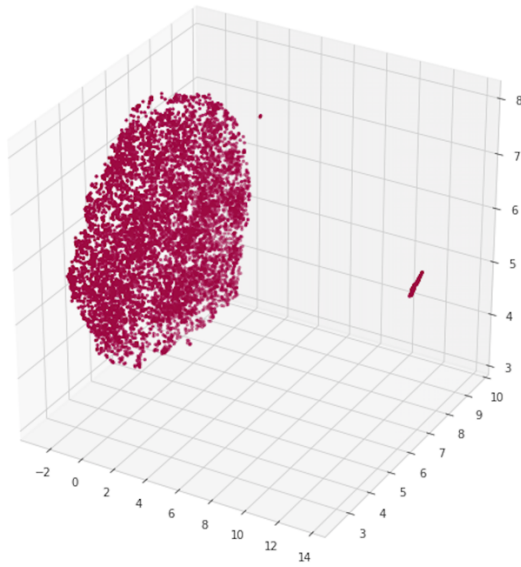

**b**

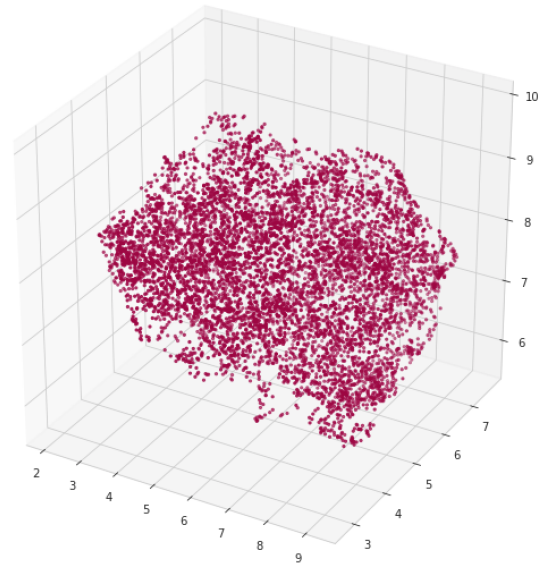

**Supplementary Figure 4. Distribution of transcriptomic community networks according to Louvain cluster detection**

Colors represent different transcriptomic communities. Circles represent genes within expression networks.

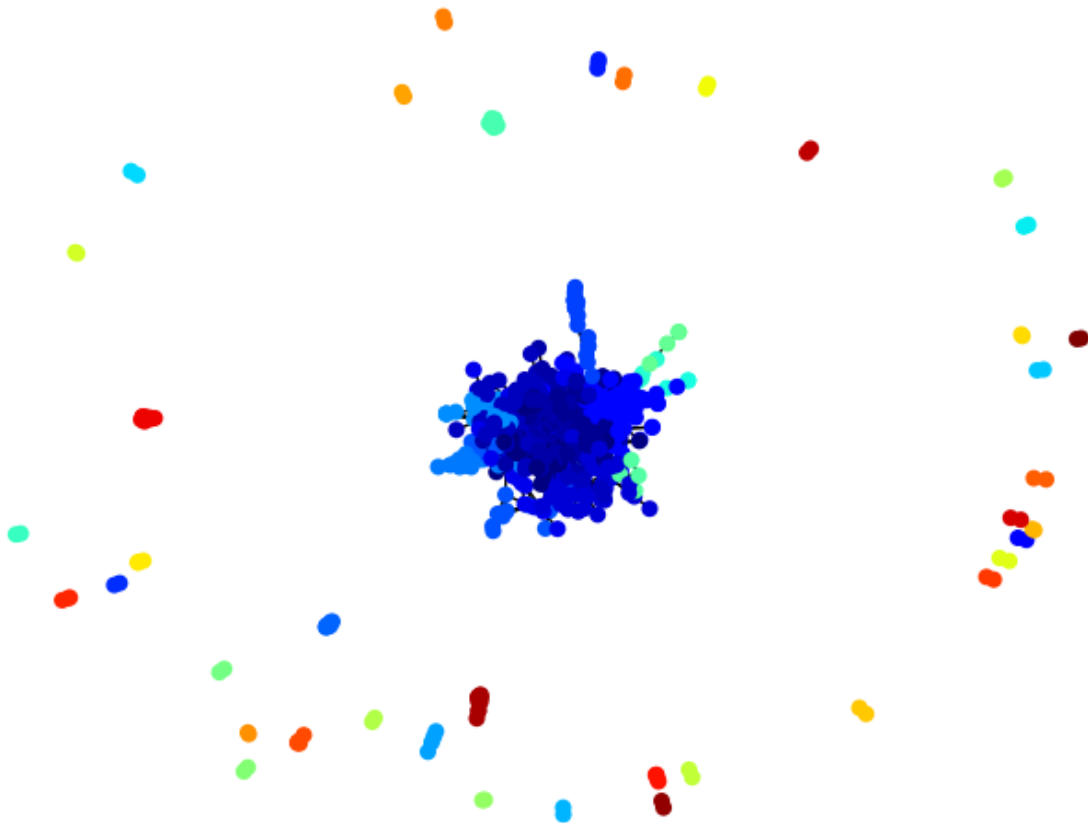

Supplementary Table 1. Demographic and clinical characteristics of the GWAS cohorts under study

| Study                                               | Cases (N) | Controls (N) | Total (N) | Female cases (%)                | Female control (%) | Case age at onset (mean , SD in years) | Control age at last exam (mean, SD in years) |
|-----------------------------------------------------|-----------|--------------|-----------|---------------------------------|--------------------|----------------------------------------|----------------------------------------------|
| Finnish Parkinson's                                 | 386       | 492          | 878       | 45.85                           | 78.9               | 55.27 (5.64)                           | 92.35 (3.86)                                 |
| McGill Parkinson's                                  | 580       | 905          | 1485      | 34.54                           | 48.4               | 65.71 (9.79)                           | 55.79 (10.69)                                |
| NEUROX-DBGAP                                        | 5429      | 5814         | 11243     | See PMID: 25064009 for details. |                    |                                        |                                              |
| Oslo Parkinson's Disease Study                      | 476       | 462          | 938       | 35.71                           | 42.21              | 65.32 (9.28)                           | 61.85 (11.06)                                |
| Baylor College of Medicine / University of Maryland | 768       | 195          | 963       | 33.81                           | 69.74              | 64.83 (10.12)                          | 65.48 (8.31)                                 |
| Spanish Parkinson's (IPDGC)                         | 2108      | 1331         | 3439      | 43.13                           | 54.39              | 63.92 (12.54)                          | 64.03 (12.59)                                |
| Tubingen Parkinson's Disease cohort (CouragePD)     | 658       | 534          | 1192      | 36.04                           | 57.93              | 59.89 (11.25)                          | 67.48 (8.41)                                 |
| UK PDMED (CouragePD)                                | 1609      | 5195         | 6804      | 32.78                           | 72.67              | NA                                     | NA                                           |
| Vance (dbGap phs000394)                             | 619       | 298          | 917       | 27.74                           | 50.84              | 77.47 (8.40)                           | 81.98 (12.78)                                |
| TOTAL                                               | 12633     | 15226        | 27859     |                                 |                    |                                        |                                              |

SD, standard deviation; NA, non applicable

**Supplementary Table 2. Demographic and clinical characteristics of the WGS cohorts under study**

| Study        | Cases (N) | Controls (N) | Total (N) | Female cases (%) | Female control (%) | Case age at onset (mean , SD in years) | Control age at last exam (mean, SD in years) |
|--------------|-----------|--------------|-----------|------------------|--------------------|----------------------------------------|----------------------------------------------|
| BIOFIND      | 91        | 68           | 159       | 35.16            | 44.11              | 64.90 (8.14)                           | 65.07 (8.12)                                 |
| NABEC        | -         | 338          | 338       | -                | 36.68              | -                                      | 58.98 (15.01)                                |
| NIH LNG PATH | 330       | -            | 330       | 33.33            | -                  | 69.22 (14.94)                          | -                                            |
| PDBP         | 798       | 433          | 1231      | 35.83            | 54.96              | 62.40 (11.55)                          | 61.92 (10.83)                                |
| NIH PD CLIN  | 507       | -            | 507       | -                | 39.44              | 55.1 (11.7)                            | -                                            |
| WELLDERLY    | -         | 1110         | 1110      | -                | 60.09              | -                                      | 85.03 (12.63)                                |
| PPMI         | 375       | 176          | 551       | 33.86            | 35.27              | 63.72 (10.14)                          | 63.79 (10.19)                                |
| UKBEC        | -         | 105          | 105       | -                | 23.8               | -                                      | 68.94 (14.95)                                |
| <b>TOTAL</b> | 2101      | 2230         | 4331      |                  |                    |                                        |                                              |

SD: standard deviation

**Supplementary Table 3. Canonical pathways significantly associated with PD risk in the *discovery phase***

| Gene set                                                                          | PRS R2   | Beta   | SE     |
|-----------------------------------------------------------------------------------|----------|--------|--------|
| POST TRANSLATIONAL PROTEIN MODIFICATION (REACTOME)                                | 0.007432 | 0.2568 | 0.0166 |
| NABA MATRISOME                                                                    | 0.004983 | 0.2099 | 0.0165 |
| VESICLE MEDIATED TRANSPORT (REACTOME)                                             | 0.004379 | 0.1964 | 0.0164 |
| DISEASE (REACTOME)                                                                | 0.004366 | 0.1962 | 0.0164 |
| NEURONAL SYSTEM (REACTOME)                                                        | 0.004368 | 0.1961 | 0.0164 |
| TRANSPORT OF SMALL MOLECULES (REACTOME)                                           | 0.004330 | 0.1954 | 0.0164 |
| DEVELOPMENTAL BIOLOGY (REACTOME)                                                  | 0.004182 | 0.1924 | 0.0164 |
| ADAPTIVE IMMUNE SYSTEM (REACTOME)                                                 | 0.003954 | 0.1867 | 0.0164 |
| GENE EXPRESSION TRANSCRIPTION (REACTOME)                                          | 0.003896 | 0.1852 | 0.0164 |
| INNATE IMMUNE SYSTEM (REACTOME)                                                   | 0.003657 | 0.1790 | 0.0164 |
| GENERIC TRANSCRIPTION PATHWAY (REACTOME)                                          | 0.003560 | 0.1769 | 0.0164 |
| AMYLOID FIBER FORMATION (REACTOME)                                                | 0.003083 | 0.1646 | 0.0164 |
| TRANSMISSION ACROSS CHEMICAL SYNAPSES (REACTOME)                                  | 0.003045 | 0.1634 | 0.0163 |
| PARKINSONS DISEASE (KEGG)                                                         | 0.002935 | 0.1635 | 0.0168 |
| NABA MATRISOME ASSOCIATED                                                         | 0.002879 | 0.1591 | 0.0164 |
| METABOLISM OF LIPIDS (REACTOME)                                                   | 0.002864 | 0.1585 | 0.0163 |
| AXON GUIDANCE (REACTOME)                                                          | 0.002825 | 0.1577 | 0.0164 |
| CLASS I MHC MEDIATED ANTIGEN PROCESSING PRESENTATION (REACTOME)                   | 0.002725 | 0.1546 | 0.0163 |
| HEMOSTASIS (REACTOME)                                                             | 0.002713 | 0.1545 | 0.0164 |
| SIGNALING BY GPCR (REACTOME)                                                      | 0.002667 | 0.1534 | 0.0164 |
| CYTOKINE SIGNALING IN IMMUNE SYSTEM (REACTOME)                                    | 0.002522 | 0.1484 | 0.0163 |
| ANTIGEN PROCESSING: UBIQUITINATION PROTEASOME DEGRADATION (REACTOME)              | 0.002467 | 0.1469 | 0.0163 |
| SIGNALING BY RECEPTOR TYROSINE KINASES (REACTOME)                                 | 0.002426 | 0.1457 | 0.0163 |
| PTK6 PROMOTES HIF1A STABILIZATION (REACTOME)                                      | 0.002543 | 0.1580 | 0.0178 |
| NEUROTRANSMITTER RECEPTORS AND POSTSYNAPTIC SIGNAL TRANSMISSION (REACTOME)        | 0.002338 | 0.1430 | 0.0163 |
| ALZHEIMERS DISEASE (KEGG)                                                         | 0.002263 | 0.1410 | 0.0163 |
| EXTRACELLULAR MATRIX ORGANIZATION (REACTOME)                                      | 0.002249 | 0.1403 | 0.0163 |
| SLC MEDIATED TRANSMEMBRANE TRANSPORT (REACTOME)                                   | 0.002203 | 0.1392 | 0.0163 |
| SIGNALING BY INTERLEUKINS (REACTOME)                                              | 0.002201 | 0.1385 | 0.0163 |
| PATHWAYS IN CANCER (KEGG)                                                         | 0.002155 | 0.1373 | 0.0163 |
| CASPASE MEDIATED CLEAVAGE OF CYTOSKELETAL PROTEINS (REACTOME)                     | 0.002125 | 0.1372 | 0.0164 |
| NABA CORE MATRISOME                                                               | 0.002092 | 0.1355 | 0.0163 |
| POST TRANSLATIONAL MODIFICATION: SYNTHESIS OF GPI ANCHORED PROTEINS (REACTOME)    | 0.002087 | 0.1358 | 0.0164 |
| ASPARAGINE N LINKED GLYCOSYLATION (REACTOME)                                      | 0.002024 | 0.1331 | 0.0163 |
| P38 GAMMA DELTA PATHWAY (PID)                                                     | 0.002019 | 0.1334 | 0.0164 |
| NEUROACTIVE LIGAND RECEPTOR INTERACTION (KEGG)                                    | 0.001980 | 0.1316 | 0.0163 |
| NEUTROPHIL DEGRANULATION (REACTOME)                                               | 0.001980 | 0.1316 | 0.0163 |
| GLUTAMATE BINDING ACTIVATION OF AMPA RECEPTORS AND SYNAPTIC PLASTICITY (REACTOME) | 0.001954 | 0.1308 | 0.0163 |
| CELL CYCLE (REACTOME)                                                             | 0.001927 | 0.1298 | 0.0163 |
| SIGNALING BY NON RECEPTOR TYROSINE KINASES (REACTOME)                             | 0.001886 | 0.1292 | 0.0164 |
| APOPTOTIC CLEAVAGE OF CELLULAR PROTEINS (REACTOME)                                | 0.001876 | 0.1289 | 0.0164 |
| ENDOCYTOSIS (KEGG)                                                                | 0.001868 | 0.1280 | 0.0163 |
| INTRA GOLGI AND RETROGRADE GOLGI TO ER TRAFFIC (REACTOME)                         | 0.001864 | 0.1275 | 0.0163 |
| DNA REPAIR (REACTOME)                                                             | 0.001793 | 0.1251 | 0.0163 |
| ION CHANNEL TRANSPORT (REACTOME)                                                  | 0.001766 | 0.1243 | 0.0163 |
| APOPTOTIC EXECUTION PHASE (REACTOME)                                              | 0.001753 | 0.1243 | 0.0164 |
| TRANSPORT TO THE GOLGI AND SUBSEQUENT MODIFICATION (REACTOME)                     | 0.001749 | 0.1238 | 0.0163 |

|                                                                                     |          |        |        |
|-------------------------------------------------------------------------------------|----------|--------|--------|
| PROGRAMMED CELL DEATH (REACTOME)                                                    | 0.001710 | 0.1231 | 0.0164 |
| GOLGI TO ER RETROGRADE TRANSPORT (REACTOME)                                         | 0.001699 | 0.1216 | 0.0162 |
| DISEASES OF SIGNAL TRANSDUCTION (REACTOME)                                          | 0.001699 | 0.1220 | 0.0163 |
| NABA ECM GLYCOPROTEINS                                                              | 0.001703 | 0.1224 | 0.0164 |
| GPCR LIGAND BINDING (REACTOME)                                                      | 0.001683 | 0.1215 | 0.0163 |
| LONG TERM DEPRESSION (KEGG)                                                         | 0.001661 | 0.1204 | 0.0163 |
| CALCIUM SIGNALING PATHWAY (KEGG)                                                    | 0.001655 | 0.1204 | 0.0163 |
| COPI DEPENDENT GOLGI TO ER RETROGRADE TRAFFIC (REACTOME)                            | 0.001621 | 0.1187 | 0.0162 |
| SIGNALING BY RHO GTPASES (REACTOME)                                                 | 0.001616 | 0.1188 | 0.0163 |
| TIGHT JUNCTION (KEGG)                                                               | 0.001610 | 0.1188 | 0.0163 |
| TRAFFICKING OF GLUR2 CONTAINING AMPA RECEPTORS (REACTOME)                           | 0.001600 | 0.1184 | 0.0163 |
| OTHER INTERLEUKIN SIGNALING (REACTOME)                                              | 0.001559 | 0.1166 | 0.0162 |
| TRANS GOLGI NETWORK VESICLE BUDDING (REACTOME)                                      | 0.001521 | 0.1148 | 0.0162 |
| ALPHA SYNUCLEIN PATHWAY (PID)                                                       | 0.001521 | 0.1157 | 0.0164 |
| CLASS B 2 SECRETIN FAMILY RECEPTORS (REACTOME)                                      | 0.001501 | 0.1146 | 0.0163 |
| FOCAL ADHESION (KEGG)                                                               | 0.001470 | 0.1135 | 0.0163 |
| GOLGI ASSOCIATED VESICLE BIOGENESIS (REACTOME)                                      | 0.001443 | 0.1118 | 0.0162 |
| AXON GUIDANCE (KEGG)                                                                | 0.001440 | 0.1123 | 0.0163 |
| CELL SURFACE INTERACTIONS AT THE VASCULAR WALL (REACTOME)                           | 0.001408 | 0.1107 | 0.0162 |
| NABA ECM REGULATORS                                                                 | 0.001340 | 0.1082 | 0.0163 |
| CLATHRIN MEDIATED ENDOCYTOSIS (REACTOME)                                            | 0.001336 | 0.1079 | 0.0162 |
| SIGNALING BY NOTCH (REACTOME)                                                       | 0.001324 | 0.1078 | 0.0163 |
| CELL CYCLE CHECKPOINTS (REACTOME)                                                   | 0.001324 | 0.1073 | 0.0162 |
| INFECTIOUS DISEASE (REACTOME)                                                       | 0.001299 | 0.1064 | 0.0162 |
| COPII MEDIATED VESICLE TRANSPORT (REACTOME)                                         | 0.001303 | 0.1070 | 0.0163 |
| ACTIVATION OF NMDA RECEPTORS AND POSTSYNAPTIC EVENTS (REACTOME)                     | 0.001297 | 0.1063 | 0.0162 |
| DISEASES OF GLYCOSYLATION (REACTOME)                                                | 0.001286 | 0.1060 | 0.0163 |
| G ALPHA 5 SIGNALLING EVENTS (REACTOME)                                              | 0.001282 | 0.1062 | 0.0163 |
| MAPK SIGNALING PATHWAY (KEGG)                                                       | 0.001276 | 0.1058 | 0.0163 |
| INTRA GOLGI TRAFFIC (REACTOME)                                                      | 0.001260 | 0.1049 | 0.0163 |
| VASOPRESSIN REGULATED WATER REABSORPTION (KEGG)                                     | 0.001248 | 0.1045 | 0.0163 |
| TRANSPORT OF BILE SALTS AND ORGANIC ACIDS METAL IONS AND AMINE COMPOUNDS (REACTOME) | 0.001243 | 0.1049 | 0.0164 |
| RHO GTPASE EFFECTORS (REACTOME)                                                     | 0.001241 | 0.1043 | 0.0163 |
| TRANSCRIPTIONAL REGULATION BY RUNX2 (REACTOME)                                      | 0.001240 | 0.1041 | 0.0163 |
| CELL CYCLE MITOTIC (REACTOME)                                                       | 0.001218 | 0.1032 | 0.0163 |
| PHOSPHOLIMETABOLISM (REACTOME)                                                      | 0.001211 | 0.1030 | 0.0163 |
| CHRONIC MYELOID LEUKEMIA (KEGG)                                                     | 0.001202 | 0.1026 | 0.0163 |
| O LINKED GLYCOSYLATION (REACTOME)                                                   | 0.001179 | 0.1013 | 0.0162 |
| SIGNALING BY ERBB2 (REACTOME)                                                       | 0.001174 | 0.1011 | 0.0162 |
| SIGNALING BY WNT (REACTOME)                                                         | 0.001174 | 0.1010 | 0.0162 |
| PLATELET ACTIVATION SIGNALING AND AGGREGATION (REACTOME)                            | 0.001173 | 0.1013 | 0.0163 |
| NATURAL KILLER CELL MEDIATED CYTOTOXICITY (KEGG)                                    | 0.001172 | 0.1011 | 0.0162 |
| ESR MEDIATED SIGNALING (REACTOME)                                                   | 0.001161 | 0.1006 | 0.0162 |
| ER TO GOLGI ANTEROGRADE TRANSPORT (REACTOME)                                        | 0.001162 | 0.1008 | 0.0163 |
| SIGNALING BY MET (REACTOME)                                                         | 0.001156 | 0.1006 | 0.0163 |
| CMYB PATHWAY (PID)                                                                  | 0.001151 | 0.1001 | 0.0162 |
| DEUBIQUITINATION (REACTOME)                                                         | 0.001142 | 0.0999 | 0.0163 |
| UBIQUITIN MEDIATED PROTEOLYSIS (KEGG)                                               | 0.001141 | 0.0999 | 0.0163 |
| LKB1 PATHWAY (PID)                                                                  | 0.001121 | 0.0988 | 0.0162 |
| MHC CLASS II ANTIGEN PRESENTATION (REACTOME)                                        | 0.001116 | 0.0992 | 0.0163 |

|                                                                                                                         |          |        |        |
|-------------------------------------------------------------------------------------------------------------------------|----------|--------|--------|
| NEDDYLATION (REACTOME)                                                                                                  | 0.001116 | 0.0987 | 0.0163 |
| G ALPHA Q SIGNALLING EVENTS (REACTOME)                                                                                  | 0.001112 | 0.0986 | 0.0163 |
| MAPK FAMILY SIGNALING CASCADES (REACTOME)                                                                               | 0.001082 | 0.0970 | 0.0162 |
| REGULATION OF ACTIN CYTOSKELETON (KEGG)                                                                                 | 0.001080 | 0.0972 | 0.0163 |
| RET SIGNALING (REACTOME)                                                                                                | 0.001071 | 0.0964 | 0.0162 |
| METABOLISM OF VITAMINS AND COFACTORS (REACTOME)                                                                         | 0.001070 | 0.0965 | 0.0162 |
| SIGNALING BY NUCLEAR RECEPTORS (REACTOME)                                                                               | 0.001049 | 0.0957 | 0.0162 |
| WNT SIGNALING PATHWAY (KEGG)                                                                                            | 0.001036 | 0.0950 | 0.0162 |
| INOSITOL PHOSPHATE METABOLISM (REACTOME)                                                                                | 0.001028 | 0.0948 | 0.0163 |
| ACTIVATION OF AMPK DOWNSTREAM OF NMDARS (REACTOME)                                                                      | 0.001003 | 0.0936 | 0.0162 |
| STIMULI SENSING CHANNELS (REACTOME)                                                                                     | 0.000990 | 0.0929 | 0.0162 |
| SMALL CELL LUNG CANCER (KEGG)                                                                                           | 0.000989 | 0.0928 | 0.0162 |
| METABOLISM OF AMINO ACIDS AND DERIVATIVES (REACTOME)                                                                    | 0.000983 | 0.0930 | 0.0163 |
| INOSITOL PHOSPHATE METABOLISM (KEGG)                                                                                    | 0.000975 | 0.0921 | 0.0162 |
| CONSTITUTIVE SIGNALING BY ABERRANT PI3K IN CANCER (REACTOME)                                                            | 0.000963 | 0.0915 | 0.0162 |
| SIGNALING BY EGFR (REACTOME)                                                                                            | 0.000944 | 0.0906 | 0.0162 |
| INTRACELLULAR SIGNALING BY SECOND MESSENGERS (REACTOME)                                                                 | 0.000931 | 0.0902 | 0.0163 |
| ERBB1 INTERNALIZATION PATHWAY (PID)                                                                                     | 0.000927 | 0.0899 | 0.0162 |
| METABOLISM OF CARBOHYDRATES (REACTOME)                                                                                  | 0.000918 | 0.0894 | 0.0162 |
| MUSCLE CONTRACTION (REACTOME)                                                                                           | 0.000916 | 0.0894 | 0.0162 |
| DISEASES ASSOCIATED WITH O GLYCOSYLATION OF PROTEINS (REACTOME)                                                         | 0.000915 | 0.0894 | 0.0163 |
| NABA SECRETED FACTORS                                                                                                   | 0.000902 | 0.0886 | 0.0162 |
| PHOSPHATIDYLINOSITOL SIGNALING SYSTEM (KEGG)                                                                            | 0.000898 | 0.0884 | 0.0162 |
| METABOLISM OF WATER SOLUBLE VITAMINS AND COFACTORS (REACTOME)                                                           | 0.000892 | 0.0881 | 0.0162 |
| LYSOSOME (KEGG)                                                                                                         | 0.000894 | 0.0890 | 0.0164 |
| ERBB SIGNALING PATHWAY (KEGG)                                                                                           | 0.000892 | 0.0881 | 0.0162 |
| REGULATION OF INSULIN LIKE GROWTH FACTOR IGF TRANSPORT AND UPTAKE BY INSULIN LIKE GROWTH FACTOR BINDING PROTEINS IGFbps | 0.000889 | 0.0880 | 0.0162 |
| LYSINE DEGRADATION (KEGG)                                                                                               | 0.000880 | 0.0875 | 0.0162 |
| GLYCOSAMINOGLYCAN METABOLISM (REACTOME)                                                                                 | 0.000875 | 0.0873 | 0.0162 |
| RUNX1 REGULATES TRANSCRIPTION OF GENES INVOLVED IN DIFFERENTIATION OF HSCS (REACTOME)                                   | 0.000872 | 0.0875 | 0.0163 |
| CELL ADHESION MOLECULES CAMS (KEGG)                                                                                     | 0.000870 | 0.0872 | 0.0162 |
| POTASSIUM CHANNELS (REACTOME)                                                                                           | 0.000871 | 0.0872 | 0.0163 |
| NEGATIVE REGULATION OF THE PI3K AKT NETWORK (REACTOME)                                                                  | 0.000868 | 0.0870 | 0.0162 |
| NCADHERIN PATHWAY (PID)                                                                                                 | 0.000866 | 0.0869 | 0.0162 |
| NON SMALL CELL LUNG CANCER (KEGG)                                                                                       | 0.000865 | 0.0869 | 0.0162 |
| GLYCOSYLPHOSPHATIDYLINOSITOL GPI ANCHOR BIOSYNTHESIS                                                                    | 0.000856 | 0.0867 | 0.0163 |
| DNA DAMAGE BYPASS (REACTOME)                                                                                            | 0.000852 | 0.0864 | 0.0163 |
| REELIN PATHWAY (PID)                                                                                                    | 0.000849 | 0.0859 | 0.0162 |
| EPHA MEDIATED GROWTH CONE COLLAPSE (REACTOME)                                                                           | 0.000847 | 0.0857 | 0.0162 |
| FACTORS INVOLVED IN MEGAKARYOCYTE DEVELOPMENT AND PLATELET PRODUCTION (REACTOME)                                        | 0.000849 | 0.0861 | 0.0163 |
| LISTERIA MONOCYTOGENES ENTRY INTO HOST CELLS (REACTOME)                                                                 | 0.000836 | 0.0854 | 0.0162 |
| RETROGRADE TRANSPORT AT THE TRANS GOLGI NETWORK (REACTOME)                                                              | 0.000834 | 0.0856 | 0.0163 |
| DUAL INCISION IN TC NER (REACTOME)                                                                                      | 0.000822 | 0.0848 | 0.0163 |
| GLIOMA (KEGG)                                                                                                           | 0.000821 | 0.0846 | 0.0162 |
| ARF6 PATHWAY (PID)                                                                                                      | 0.000817 | 0.0844 | 0.0162 |
| SPHINGOLIMETABOLISM (KEGG)                                                                                              | 0.000822 | 0.0856 | 0.0165 |
| COLLAGEN FORMATION (REACTOME)                                                                                           | 0.000810 | 0.0840 | 0.0162 |
| TCR PATHWAY (PID)                                                                                                       | 0.000801 | 0.0836 | 0.0162 |
| SNARE INTERACTIONS IN VESICULAR TRANSPORT (KEGG)                                                                        | 0.000800 | 0.0834 | 0.0162 |
| PROTEIN PROTEIN INTERACTIONS AT SYNAPSES (REACTOME)                                                                     | 0.000794 | 0.0831 | 0.0162 |

|                                                                             |          |        |        |
|-----------------------------------------------------------------------------|----------|--------|--------|
| COPI MEDIATED ANTEROGRADE TRANSPORT (REACTOME)                              | 0.000793 | 0.0832 | 0.0162 |
| ESTROGEN DEPENDENT GENE EXPRESSION (REACTOME)                               | 0.000791 | 0.0830 | 0.0162 |
| NEGATIVE REGULATION OF MET ACTIVITY (REACTOME)                              | 0.000791 | 0.0830 | 0.0162 |
| NUCLEOTIDE EXCISION REPAIR (REACTOME)                                       | 0.000791 | 0.0831 | 0.0162 |
| C TYPE LECTIN RECEPTORS CLRS (REACTOME)                                     | 0.000789 | 0.0829 | 0.0162 |
| L1CAM INTERACTIONS (REACTOME)                                               | 0.000789 | 0.0829 | 0.0162 |
| SPHINGOLIMETABOLISM (REACTOME)                                              | 0.000789 | 0.0835 | 0.0163 |
| PI3K AKT SIGNALING IN CANCER (REACTOME)                                     | 0.000788 | 0.0828 | 0.0162 |
| DEGRADATION OF THE EXTRACELLULAR MATRIX (REACTOME)                          | 0.000783 | 0.0827 | 0.0162 |
| P53 DOWNSTREAM PATHWAY (PID)                                                | 0.000782 | 0.0824 | 0.0162 |
| RECOGNITION OF DNA DAMAGE BY PCNA CONTAINING REPLICATION COMPLEX (REACTOME) | 0.000783 | 0.0829 | 0.0163 |
| PEPTIDE HORMONE METABOLISM (REACTOME)                                       | 0.000781 | 0.0824 | 0.0162 |
| SHC1 EVENTS IN ERBB2 SIGNALING (REACTOME)                                   | 0.000778 | 0.0822 | 0.0162 |
| SYNTHESIS OF IP3 AND IP4 IN THE CYTOSOL (REACTOME)                          | 0.000776 | 0.0822 | 0.0162 |
| DNA REPLICATION (REACTOME)                                                  | 0.000776 | 0.0823 | 0.0162 |
| HEDGEHOG SIGNALING PATHWAY (KEGG)                                           | 0.000773 | 0.0819 | 0.0162 |
| ECADHERIN KERATINOCYTE PATHWAY                                              | 0.000769 | 0.0818 | 0.0162 |
| MITOTIC METAPHASE AND ANAPHASE (REACTOME)                                   | 0.000769 | 0.0818 | 0.0162 |
| CELLULAR RESPONSES TO STRESS (REACTOME)                                     | 0.000763 | 0.0817 | 0.0163 |
| PURINE METABOLISM (KEGG)                                                    | 0.000762 | 0.0817 | 0.0163 |
| RUNX1 REGULATES ESTROGEN RECEPTOR MEDIATED TRANSCRIPTION (REACTOME)         | 0.000761 | 0.0815 | 0.0162 |
| CELL CELL COMMUNICATION (REACTOME)                                          | 0.000756 | 0.0813 | 0.0162 |
| MITOTIC SPINDLE CHECKPOINT (REACTOME)                                       | 0.000754 | 0.0810 | 0.0162 |
| REGULATION OF MITOTIC CELL CYCLE (REACTOME)                                 | 0.000752 | 0.0810 | 0.0162 |
| PDGFRB PATHWAY (PID)                                                        | 0.000750 | 0.0810 | 0.0163 |
| MET PATHWAY (PID)                                                           | 0.000749 | 0.0811 | 0.0163 |
| TXA2PATHWAY (PID)                                                           | 0.000742 | 0.0806 | 0.0163 |
| CELLULAR RESPONSES TO EXTERNAL STIMULI (REACTOME)                           | 0.000741 | 0.0805 | 0.0162 |
| TRANSCRIPTION COUPLED NUCLEOTIDE EXCISION REPAIR TC NER (REACTOME)          | 0.000741 | 0.0805 | 0.0163 |
| DNA DOUBLE STRAND BREAK REPAIR (REACTOME)                                   | 0.000738 | 0.0800 | 0.0162 |
| ION TRANSPORT BY P TYPE ATPASES (REACTOME)                                  | 0.000738 | 0.0803 | 0.0163 |
| SEMA4D IN SEMAPHORIN SIGNALING (REACTOME)                                   | 0.000737 | 0.0801 | 0.0162 |
| O GLYCOSYLATION OF TSR DOMAIN CONTAINING PROTEINS (REACTOME)                | 0.000736 | 0.0801 | 0.0162 |
| M PHASE (REACTOME)                                                          | 0.000735 | 0.0803 | 0.0163 |
| T CELL RECEPTOR SIGNALING PATHWAY (KEGG)                                    | 0.000735 | 0.0801 | 0.0162 |
| NFAT 3PATHWAY (PID)                                                         | 0.000732 | 0.0800 | 0.0163 |
| ER NONGENOMIC PATHWAY (PID)                                                 | 0.000732 | 0.0799 | 0.0162 |
| RUNX1 REGULATES TRANSCRIPTION OF GENES INVOLVED IN BCR SIGNALING (REACTOME) | 0.000730 | 0.0798 | 0.0162 |
| SIG PIP3 SIGNALING IN CARDIAC MYOCTES                                       | 0.000730 | 0.0798 | 0.0162 |
| METABOLISM OF NUCLEOTIDES (REACTOME)                                        | 0.000728 | 0.0795 | 0.0162 |
| BIOLOGICAL OXIDATIONS (REACTOME)                                            | 0.000727 | 0.0796 | 0.0162 |
| DISORDERS OF TRANSMEMBRANE TRANSPORTERS (REACTOME)                          | 0.000727 | 0.0795 | 0.0162 |
| VOLTAGE GATED POTASSIUM CHANNELS (REACTOME)                                 | 0.000728 | 0.0797 | 0.0162 |
| INLB MEDIATED ENTRY OF LISTERIA MONOCYTOGENES INTO HOST CELL (REACTOME)     | 0.000721 | 0.0792 | 0.0162 |
| TRANSCRIPTIONAL REGULATION BY RUNX3 (REACTOME)                              | 0.000719 | 0.0792 | 0.0162 |
| BETA CATENIN INDEPENDENT WNT SIGNALING (REACTOME)                           | 0.000718 | 0.0790 | 0.0162 |
| GLYCEROPHOSPHOLIBIOSYNTHESIS (REACTOME)                                     | 0.000718 | 0.0792 | 0.0162 |
| SHH PATHWAY (BIOCARTA)                                                      | 0.000715 | 0.0788 | 0.0162 |
| AMB2 NEUTROPHILS PATHWAY (PID)                                              | 0.000711 | 0.0787 | 0.0162 |
| NEUROTROPHIN SIGNALING PATHWAY (KEGG)                                       | 0.000708 | 0.0785 | 0.0162 |

|                                                                   |          |        |        |
|-------------------------------------------------------------------|----------|--------|--------|
| TRANSCRIPTIONAL REGULATION BY RUNX1 (REACTOME)                    | 0.000705 | 0.0783 | 0.0162 |
| CLASS A 1 RHODOPSIN LIKE RECEPTORS (REACTOME)                     | 0.000702 | 0.0783 | 0.0162 |
| LIS1 PATHWAY (BIOCARTA)                                           | 0.000688 | 0.0771 | 0.0161 |
| SIGNALING BY NTRKS (REACTOME)                                     | 0.000686 | 0.0774 | 0.0162 |
| SIGNALING BY ERBB4 (REACTOME)                                     | 0.000683 | 0.0772 | 0.0162 |
| PCP CE PATHWAY (REACTOME)                                         | 0.000682 | 0.0770 | 0.0162 |
| AP1 PATHWAY (PID)                                                 | 0.000681 | 0.0772 | 0.0162 |
| CHROMATIN ORGANIZATION (REACTOME)                                 | 0.000680 | 0.0773 | 0.0163 |
| EPH EPHRIN SIGNALING (REACTOME)                                   | 0.000679 | 0.0770 | 0.0163 |
| METABOLISM OF RNA (REACTOME)                                      | 0.000676 | 0.0768 | 0.0162 |
| MELANOMA (KEGG)                                                   | 0.000675 | 0.0767 | 0.0162 |
| UCH PROTEINASES (REACTOME)                                        | 0.000671 | 0.0767 | 0.0163 |
| FCGAMMA RECEPTOR FCGR DEPENDENT PHAGOCYTOSIS (REACTOME)           | 0.000659 | 0.0761 | 0.0163 |
| TRANSCRIPTIONAL REGULATION BY TP53 (REACTOME)                     | 0.000655 | 0.0754 | 0.0162 |
| LONG TERM POTENTIATION (KEGG)                                     | 0.000655 | 0.0756 | 0.0162 |
| IRON UPTAKE AND TRANSPORT (REACTOME)                              | 0.000654 | 0.0757 | 0.0163 |
| TRANSLATION (REACTOME)                                            | 0.000651 | 0.0755 | 0.0163 |
| RHOA PATHWAY (PID)                                                | 0.000650 | 0.0755 | 0.0163 |
| NABA ECM AFFILIATED                                               | 0.000647 | 0.0751 | 0.0162 |
| SEMAPHORIN INTERACTIONS (REACTOME)                                | 0.000647 | 0.0751 | 0.0162 |
| FC EPSILON RECEPTOR FCER1 SIGNALING (REACTOME)                    | 0.000645 | 0.0751 | 0.0162 |
| DUAL INCISION IN GG NER (REACTOME)                                | 0.000646 | 0.0753 | 0.0163 |
| S PHASE (REACTOME)                                                | 0.000644 | 0.0749 | 0.0162 |
| PROTEIN REPAIR (REACTOME)                                         | 0.000643 | 0.0753 | 0.0163 |
| LEUKOCYTE TRANSENDOTHELIAL MIGRATION (KEGG)                       | 0.000634 | 0.0742 | 0.0162 |
| EGFR TRANSACTIVATION BY GASTRIN (REACTOME)                        | 0.000634 | 0.0746 | 0.0163 |
| AJDISS 2PATHWAY (PID)                                             | 0.000629 | 0.0743 | 0.0163 |
| ACUTE MYELOID LEUKEMIA (KEGG)                                     | 0.000630 | 0.0742 | 0.0162 |
| TNFR2 NON CANONICAL NF KB PATHWAY (REACTOME)                      | 0.000627 | 0.0740 | 0.0162 |
| A6B1 A6B4 INTEGRIN PATHWAY                                        | 0.000624 | 0.0737 | 0.0162 |
| HUNTINGTONS DISEASE (KEGG)                                        | 0.000621 | 0.0736 | 0.0162 |
| BASAL CELL CARCINOMA (KEGG)                                       | 0.000620 | 0.0734 | 0.0162 |
| G ALPHA I SIGNALLING EVENTS (REACTOME)                            | 0.000621 | 0.0736 | 0.0162 |
| EGFR DOWNREGULATION (REACTOME)                                    | 0.000617 | 0.0733 | 0.0162 |
| ATF2 PATHWAY (PID)                                                | 0.000616 | 0.0733 | 0.0162 |
| MET ACTIVATES PTK2 SIGNALING (REACTOME)                           | 0.000614 | 0.0732 | 0.0162 |
| TRANSCRIPTIONAL REGULATION OF GRANULOPOIESIS (REACTOME)           | 0.000613 | 0.0732 | 0.0162 |
| NOTCH PATHWAY (PID)                                               | 0.000612 | 0.0730 | 0.0162 |
| PKMTS METHYLATE HISTONE LYSINES (REACTOME)                        | 0.000611 | 0.0731 | 0.0162 |
| TRANSCRIPTIONAL REGULATION BY MECP2 (REACTOME)                    | 0.000611 | 0.0729 | 0.0162 |
| FATTY ACYL COA BIOSYNTHESIS (REACTOME)                            | 0.000609 | 0.0735 | 0.0164 |
| EPITHELIAL CELL SIGNALING IN HELICOBACTER PYLORI INFECTION (KEGG) | 0.000607 | 0.0726 | 0.0162 |
| EPHA FWDPATHWAY (PID)                                             | 0.000605 | 0.0726 | 0.0162 |
| HIV INFECTION (REACTOME)                                          | 0.000605 | 0.0726 | 0.0162 |
| ECADHERIN STABILIZATION PATHWAY (PID)                             | 0.000605 | 0.0729 | 0.0163 |
| UNFOLDED PROTEIN RESPONSE UPR (REACTOME)                          | 0.000606 | 0.0728 | 0.0163 |
| GRB2 EVENTS IN ERBB2 SIGNALING (REACTOME)                         | 0.000597 | 0.0720 | 0.0162 |
| PI3KCI PATHWAY (PID)                                              | 0.000595 | 0.0719 | 0.0162 |
| REGULATION OF INSULIN SECRETION (REACTOME)                        | 0.000596 | 0.0721 | 0.0162 |
| PHASE I FUNCTIONALIZATION OF COMPOUNDS (REACTOME)                 | 0.000594 | 0.0718 | 0.0162 |

|                                                                                                                     |          |        |        |
|---------------------------------------------------------------------------------------------------------------------|----------|--------|--------|
| REGULATION OF RUNX2 EXPRESSION AND ACTIVITY (REACTOME)                                                              | 0.000595 | 0.0720 | 0.0162 |
| SIGNALING BY THE B CELL RECEPTOR BCR (REACTOME)                                                                     | 0.000590 | 0.0717 | 0.0162 |
| RUNX1 REGULATES TRANSCRIPTION OF GENES INVOLVED IN WNT SIGNALING (REACTOME)                                         | 0.000588 | 0.0716 | 0.0162 |
| PI3K EVENTS IN ERBB2 SIGNALING (REACTOME)                                                                           | 0.000584 | 0.0713 | 0.0162 |
| O GLYCAN BIOSYNTHESIS (KEGG)                                                                                        | 0.000581 | 0.0710 | 0.0162 |
| HEPARAN SULFATE HEPARIN HS GAG METABOLISM (REACTOME)                                                                | 0.000579 | 0.0709 | 0.0162 |
| CDK MEDIATED PHOSPHORYLATION AND REMOVAL OF CDC6 (REACTOME)                                                         | 0.000578 | 0.0710 | 0.0162 |
| APC C:CDH1 MEDIATED DEGRADATION OF CDC20 AND OTHER APC C:CDH1 TARGETED PROTEINS IN LATE MITOSIS EARLY G1 (REACTOME) | 0.000578 | 0.0710 | 0.0162 |
| GRANULOCYTES PATHWAY (BIOCARTA)                                                                                     | 0.000577 | 0.0708 | 0.0162 |
| ARGININE AND PROLINE METABOLISM (KEGG)                                                                              | 0.000579 | 0.0714 | 0.0163 |
| CARDIAC CONDUCTION (REACTOME)                                                                                       | 0.000575 | 0.0708 | 0.0162 |
| ECM RECEPTOR INTERACTION (KEGG)                                                                                     | 0.000573 | 0.0709 | 0.0163 |
| GASTRIN CREB SIGNALLING PATHWAY VIA PKC AND MAPK (REACTOME)                                                         | 0.000573 | 0.0709 | 0.0163 |
| LGI ADAM INTERACTIONS (REACTOME)                                                                                    | 0.000570 | 0.0704 | 0.0162 |
| INTERLEUKIN 4 AND INTERLEUKIN 13 SIGNALING (REACTOME)                                                               | 0.000567 | 0.0702 | 0.0162 |
| HOMOLOGY DIRECTED REPAIR (REACTOME)                                                                                 | 0.000566 | 0.0700 | 0.0162 |
| MTOR 4PATHWAY (PID)                                                                                                 | 0.000566 | 0.0704 | 0.0163 |
| AUTOIMMUNE THYROID DISEASE (KEGG)                                                                                   | 0.000560 | 0.0727 | 0.0169 |
| ACTIVATION OF APC C AND APC C:CDC20 MEDIATED DEGRADATION OF MITOTIC PROTEINS (REACTOME)                             | 0.000557 | 0.0697 | 0.0162 |
| HOST INTERACTIONS OF HIV FACTORS (REACTOME)                                                                         | 0.000557 | 0.0698 | 0.0163 |
| ERBB4 PATHWAY (PID)                                                                                                 | 0.000556 | 0.0696 | 0.0162 |
| SIGNALING BY PDGF (REACTOME)                                                                                        | 0.000555 | 0.0696 | 0.0162 |
| RHO GTPASE CYCLE (REACTOME)                                                                                         | 0.000554 | 0.0694 | 0.0162 |
| RUNX1 REGULATES EXPRESSION OF COMPONENTS OF TIGHT JUNCTIONS (REACTOME)                                              | 0.000552 | 0.0695 | 0.0162 |
| HER2 PATHWAY (BIOCARTA)                                                                                             | 0.000552 | 0.0693 | 0.0162 |
| TRANSPORT OF INORGANIC CATIONS ANIONS AND AMINO ACIDS OLIGOPEPTIDES (REACTOME)                                      | 0.000551 | 0.0692 | 0.0162 |
| IRE1ALPHA ACTIVATES CHAPERONES (REACTOME)                                                                           | 0.000550 | 0.0695 | 0.0163 |
| INTEGRIN2 PATHWAY (PID)                                                                                             | 0.000546 | 0.0687 | 0.0162 |
| DOWNREGULATION OF ERBB2 SIGNALING (REACTOME)                                                                        | 0.000546 | 0.0689 | 0.0162 |
| ONCOGENIC MAPK SIGNALING (REACTOME)                                                                                 | 0.000545 | 0.0690 | 0.0162 |
| SHC1 EVENTS IN ERBB4 SIGNALING (REACTOME)                                                                           | 0.000544 | 0.0687 | 0.0162 |
| NUCLEAR RECEPTOR TRANSCRIPTION PATHWAY (REACTOME)                                                                   | 0.000542 | 0.0689 | 0.0163 |

PRS R2, variance explained by polygenic risk score; SE, standard error; P, P-value; num SNP, Number of SNPs included in each pathway analysis

**Supplementary Table 4. SNPs within 90 risk loci and 1 Mb upstream and downstream from the GWAS signal included per gene-set**

**a) TRAINING PHASE**

| <b>SNP</b>   | <b>Gene</b>     | <b>Gene-set</b>                 |
|--------------|-----------------|---------------------------------|
| 17:7352976   | <i>V1NB1</i>    | BIOCARTA_ACH_PATHWAY            |
| 3:48835245   | <i>IP6K2</i>    | BIOCARTA_AGPCR_PATHWAY          |
| 3:49561208   | <i>IP6K2</i>    | BIOCARTA_AGR_PATHWAY            |
| 6:112494762  | <i>FYN</i>      | BIOCARTA_AGR_PATHWAY            |
| 6:112531401  | <i>FYN</i>      | BIOCARTA_AGR_PATHWAY            |
| 6:112561154  | <i>FYN</i>      | BIOCARTA_AGR_PATHWAY            |
| 6:112561430  | <i>FYN</i>      | BIOCARTA_AGR_PATHWAY            |
| 3:48835245   | <i>IP6K2</i>    | BIOCARTA_AKAP13_PATHWAY         |
| 3:49406095   | <i>IP6K2</i>    | BIOCARTA_AKAP13_PATHWAY         |
| 3:49424231   | <i>IP6K2</i>    | BIOCARTA_AKAP13_PATHWAY         |
| 3:49450137   | <i>IP6K2</i>    | BIOCARTA_AKAP13_PATHWAY         |
| 3:48835245   | <i>IP6K2</i>    | BIOCARTA_AKAP95_PATHWAY         |
| 5:133558885  | <i>C5orf24</i>  | BIOCARTA_AKAP95_PATHWAY         |
| 3:48835245   | <i>IP6K2</i>    | BIOCARTA_AKAPCENTROSOME_PATHWAY |
| 3:49406095   | <i>IP6K2</i>    | BIOCARTA_AKAPCENTROSOME_PATHWAY |
| 3:49424231   | <i>IP6K2</i>    | BIOCARTA_AKAPCENTROSOME_PATHWAY |
| 3:49450137   | <i>IP6K2</i>    | BIOCARTA_AKAPCENTROSOME_PATHWAY |
| 5:133558885  | <i>C5orf24</i>  | BIOCARTA_AKAPCENTROSOME_PATHWAY |
| 5:133558885  | <i>C5orf24</i>  | BIOCARTA_AKT_PATHWAY            |
| 8:11558567   | <i>CTSB</i>     | BIOCARTA_ALK_PATHWAY            |
| 8:11599269   | <i>CTSB</i>     | BIOCARTA_ALK_PATHWAY            |
| 6:31897219   | <i>HLA-DRB5</i> | BIOCARTA_ALTERNATIVE_PATHWAY    |
| 2:168682052  | <i>STK39</i>    | BIOCARTA_AMAN_PATHWAY           |
| 8:131145058  | <i>FAM49B</i>   | BIOCARTA_ARAP_PATHWAY           |
| 8:131153067  | <i>FAM49B</i>   | BIOCARTA_ARAP_PATHWAY           |
| 8:131245821  | <i>FAM49B</i>   | BIOCARTA_ARAP_PATHWAY           |
| 8:131328260  | <i>FAM49B</i>   | BIOCARTA_ARAP_PATHWAY           |
| 8:131404984  | <i>FAM49B</i>   | BIOCARTA_ARAP_PATHWAY           |
| 8:131408202  | <i>FAM49B</i>   | BIOCARTA_ARAP_PATHWAY           |
| 8:131455469  | <i>FAM49B</i>   | BIOCARTA_ARAP_PATHWAY           |
| 10:104005410 | <i>GBF1</i>     | BIOCARTA_ARAP_PATHWAY           |
| 10:104034550 | <i>GBF1</i>     | BIOCARTA_ARAP_PATHWAY           |
| 17:76727455  | <i>DNAH17</i>   | BIOCARTA_ARAP_PATHWAY           |
| 17:7578671   | <i>V1NB1</i>    | BIOCARTA_ARF_PATHWAY            |
| 17:7578671   | <i>V1NB1</i>    | BIOCARTA_ATM_PATHWAY            |
| 17:7578671   | <i>V1NB1</i>    | BIOCARTA_ATRBRCA_PATHWAY        |
| 3:48835245   | <i>IP6K2</i>    | BIOCARTA_BAD_PATHWAY            |
| 6:112137847  | <i>FYN</i>      | BIOCARTA_BIOPEPTIDES_PATHWAY    |
| 6:112151452  | <i>FYN</i>      | BIOCARTA_BIOPEPTIDES_PATHWAY    |
| 6:112175069  | <i>FYN</i>      | BIOCARTA_BIOPEPTIDES_PATHWAY    |
| 16:30510571  | <i>SETD1A</i>   | BIOCARTA_BLYMPHOCYTE_PATHWAY    |
| 16:30516492  | <i>SETD1A</i>   | BIOCARTA_BLYMPHOCYTE_PATHWAY    |
| 16:30520856  | <i>SETD1A</i>   | BIOCARTA_BLYMPHOCYTE_PATHWAY    |
| 17:7578671   | <i>V1NB1</i>    | BIOCARTA_BTG2_PATHWAY           |
| 3:49406095   | <i>IP6K2</i>    | BIOCARTA_CARDIACEGF_PATHWAY     |
| 3:49424231   | <i>IP6K2</i>    | BIOCARTA_CARDIACEGF_PATHWAY     |

|             |                 |                             |
|-------------|-----------------|-----------------------------|
| 3:49450137  | <i>IP6K2</i>    | BIOCARTA_CARDIACEGF_PATHWAY |
| 3:48835245  | <i>IP6K2</i>    | BIOCARTA_CARM1_PATHWAY      |
| 1:156059276 | <i>GBAP1</i>    | BIOCARTA_CASPASE_PATHWAY    |
| 1:226568665 | <i>ITPKB</i>    | BIOCARTA_CASPASE_PATHWAY    |
| 3:49406095  | <i>IP6K2</i>    | BIOCARTA_CCR3_PATHWAY       |
| 3:49424231  | <i>IP6K2</i>    | BIOCARTA_CCR3_PATHWAY       |
| 3:49450137  | <i>IP6K2</i>    | BIOCARTA_CCR3_PATHWAY       |
| 17:43390763 | <i>CRHR1_2</i>  | BIOCARTA_CD40_PATHWAY       |
| 3:48199695  | <i>IP6K2</i>    | BIOCARTA_CDC25_PATHWAY      |
| 3:48214438  | <i>IP6K2</i>    | BIOCARTA_CDC25_PATHWAY      |
| 3:49406095  | <i>IP6K2</i>    | BIOCARTA_CDC42RAC_PATHWAY   |
| 3:49424231  | <i>IP6K2</i>    | BIOCARTA_CDC42RAC_PATHWAY   |
| 3:49450137  | <i>IP6K2</i>    | BIOCARTA_CDC42RAC_PATHWAY   |
| 3:48199695  | <i>IP6K2</i>    | BIOCARTA_CELLCYCLE_PATHWAY  |
| 3:48214438  | <i>IP6K2</i>    | BIOCARTA_CELLCYCLE_PATHWAY  |
| 3:48835245  | <i>IP6K2</i>    | BIOCARTA_CFTR_PATHWAY       |
| 1:226568665 | <i>ITPKB</i>    | BIOCARTA_CHEMICAL_PATHWAY   |
| 17:7578671  | <i>V1NB1</i>    | BIOCARTA_CHEMICAL_PATHWAY   |
| 3:48835245  | <i>IP6K2</i>    | BIOCARTA_CHREBP_PATHWAY     |
| 5:133558885 | <i>C5orf24</i>  | BIOCARTA_CHREBP_PATHWAY     |
| 3:48835245  | <i>IP6K2</i>    | BIOCARTA_CK1_PATHWAY        |
| 5:133558885 | <i>C5orf24</i>  | BIOCARTA_CK1_PATHWAY        |
| 6:31895092  | <i>HLA-DRB5</i> | BIOCARTA_CLASSIC_PATHWAY    |
| 6:31897219  | <i>HLA-DRB5</i> | BIOCARTA_CLASSIC_PATHWAY    |
| 6:31895092  | <i>HLA-DRB5</i> | BIOCARTA_COMP_PATHWAY       |
| 6:31897219  | <i>HLA-DRB5</i> | BIOCARTA_COMP_PATHWAY       |
| 3:48835245  | <i>IP6K2</i>    | BIOCARTA_CREB_PATHWAY       |
| 3:48835245  | <i>IP6K2</i>    | BIOCARTA_CSK_PATHWAY        |
| 5:133558885 | <i>C5orf24</i>  | BIOCARTA_CTCF_PATHWAY       |
| 17:7578671  | <i>V1NB1</i>    | BIOCARTA_CTCF_PATHWAY       |
| 16:30510571 | <i>SETD1A</i>   | BIOCARTA_CTL_PATHWAY        |
| 16:30516492 | <i>SETD1A</i>   | BIOCARTA_CTL_PATHWAY        |
| 16:30520856 | <i>SETD1A</i>   | BIOCARTA_CTL_PATHWAY        |
| 1:226568665 | <i>ITPKB</i>    | BIOCARTA_D4GDI_PATHWAY      |
| 16:31370452 | <i>SETD1A</i>   | BIOCARTA_DC_PATHWAY         |
| 1:156059276 | <i>GBAP1</i>    | BIOCARTA_DEATH_PATHWAY      |
| 17:43390763 | <i>CRHR1_2</i>  | BIOCARTA_DEATH_PATHWAY      |
| 2:95967628  | <i>KCNIP3</i>   | BIOCARTA_DREAM_PATHWAY      |
| 3:48835245  | <i>IP6K2</i>    | BIOCARTA_DREAM_PATHWAY      |
| 3:49406095  | <i>IP6K2</i>    | BIOCARTA_ECM_PATHWAY        |
| 3:49424231  | <i>IP6K2</i>    | BIOCARTA_ECM_PATHWAY        |
| 3:49450137  | <i>IP6K2</i>    | BIOCARTA_ECM_PATHWAY        |
| 6:112137847 | <i>FYN</i>      | BIOCARTA_ECM_PATHWAY        |
| 6:112151452 | <i>FYN</i>      | BIOCARTA_ECM_PATHWAY        |
| 6:112175069 | <i>FYN</i>      | BIOCARTA_ECM_PATHWAY        |
| 3:49406095  | <i>IP6K2</i>    | BIOCARTA_EDG1_PATHWAY       |
| 3:49424231  | <i>IP6K2</i>    | BIOCARTA_EDG1_PATHWAY       |
| 3:49450137  | <i>IP6K2</i>    | BIOCARTA_EDG1_PATHWAY       |
| 17:7578671  | <i>V1NB1</i>    | BIOCARTA_EFP_PATHWAY        |
| 17:7479140  | <i>V1NB1</i>    | BIOCARTA{EIF4_PATHWAY       |
| 17:7480325  | <i>V1NB1</i>    | BIOCARTA{EIF4_PATHWAY       |
| 17:7479140  | <i>V1NB1</i>    | BIOCARTA{EIF_PATHWAY        |
| 17:7480325  | <i>V1NB1</i>    | BIOCARTA{EIF_PATHWAY        |

|             |                 |                               |
|-------------|-----------------|-------------------------------|
| 6:112137847 | <i>FYN</i>      | BIOCARTA_EPHA4_PATHWAY        |
| 6:112151452 | <i>FYN</i>      | BIOCARTA_EPHA4_PATHWAY        |
| 6:112175069 | <i>FYN</i>      | BIOCARTA_EPHA4_PATHWAY        |
| 17:40392358 | <i>RETREG3</i>  | BIOCARTA_EPO_PATHWAY          |
| 5:133558885 | <i>C5orf24</i>  | BIOCARTA_ERK_PATHWAY          |
| 1:156059276 | <i>GBAP1</i>    | BIOCARTA_FAS_PATHWAY          |
| 1:226568665 | <i>ITPKB</i>    | BIOCARTA_FAS_PATHWAY          |
| 6:33287183  | <i>HLA-DRB5</i> | BIOCARTA_FAS_PATHWAY          |
| 19:3142784  | <i>SPPL2B</i>   | BIOCARTA FMLP_PATHWAY         |
| 19:3147326  | <i>SPPL2B</i>   | BIOCARTA FMLP_PATHWAY         |
| 3:48199695  | <i>IP6K2</i>    | BIOCARTA_G1_PATHWAY           |
| 3:48214438  | <i>IP6K2</i>    | BIOCARTA_G1_PATHWAY           |
| 17:7578671  | <i>V1NB1</i>    | BIOCARTA_G1_PATHWAY           |
| 3:48199695  | <i>IP6K2</i>    | BIOCARTA_G2_PATHWAY           |
| 3:48214438  | <i>IP6K2</i>    | BIOCARTA_G2_PATHWAY           |
| 17:7578671  | <i>V1NB1</i>    | BIOCARTA_G2_PATHWAY           |
| 17:44800946 | <i>WNT3</i>     | BIOCARTA_GABA_PATHWAY         |
| 17:44833217 | <i>WNT3</i>     | BIOCARTA_GABA_PATHWAY         |
| 3:48835245  | <i>IP6K2</i>    | BIOCARTA_GATA3_PATHWAY        |
| 17:40392358 | <i>RETREG3</i>  | BIOCARTA_GH_PATHWAY           |
| 7:22311894  | <i>GPNMB</i>    | BIOCARTA_GHRELIN_PATHWAY      |
| 17:40392358 | <i>RETREG3</i>  | BIOCARTA_GLEEVEC_PATHWAY      |
| 3:48835245  | <i>IP6K2</i>    | BIOCARTA_GPCR_PATHWAY         |
| 16:30510571 | <i>SETD1A</i>   | BIOCARTA GRANULOCYTES_PATHWAY |
| 16:30516492 | <i>SETD1A</i>   | BIOCARTA GRANULOCYTES_PATHWAY |
| 16:30520856 | <i>SETD1A</i>   | BIOCARTA GRANULOCYTES_PATHWAY |
| 5:133558885 | <i>C5orf24</i>  | BIOCARTA_GSK3_PATHWAY         |
| 17:8025979  | <i>V1NB1</i>    | BIOCARTA_HES_PATHWAY          |
| 1:156059276 | <i>GBAP1</i>    | BIOCARTA_HIVNEF_PATHWAY       |
| 1:226568665 | <i>ITPKB</i>    | BIOCARTA_HIVNEF_PATHWAY       |
| 1:227067656 | <i>ITPKB</i>    | BIOCARTA_HIVNEF_PATHWAY       |
| 6:33287183  | <i>HLA-DRB5</i> | BIOCARTA_HIVNEF_PATHWAY       |
| 17:43390763 | <i>CRHR1_2</i>  | BIOCARTA_HIVNEF_PATHWAY       |
| 6:33287183  | <i>HLA-DRB5</i> | BIOCARTA_HSP27_PATHWAY        |
| 5:133558885 | <i>C5orf24</i>  | BIOCARTA_IGF1MTOR_PATHWAY     |
| 3:48835245  | <i>IP6K2</i>    | BIOCARTA_IGF1R_PATHWAY        |
| 2:102720323 | <i>MAP4K4</i>   | BIOCARTA_IL1R_PATHWAY         |
| 2:102783052 | <i>MAP4K4</i>   | BIOCARTA_IL1R_PATHWAY         |
| 17:43390763 | <i>CRHR1_2</i>  | BIOCARTA_IL1R_PATHWAY         |
| 17:40392358 | <i>RETREG3</i>  | BIOCARTA_IL22BP_PATHWAY       |
| 17:40392358 | <i>RETREG3</i>  | BIOCARTA_IL2_PATHWAY          |
| 17:40392358 | <i>RETREG3</i>  | BIOCARTA_IL2RB_PATHWAY        |
| 17:40392358 | <i>RETREG3</i>  | BIOCARTA_IL3_PATHWAY          |
| 6:112137847 | <i>FYN</i>      | BIOCARTA_IL7_PATHWAY          |
| 6:112151452 | <i>FYN</i>      | BIOCARTA_IL7_PATHWAY          |
| 6:112175069 | <i>FYN</i>      | BIOCARTA_IL7_PATHWAY          |
| 17:40392358 | <i>RETREG3</i>  | BIOCARTA_IL7_PATHWAY          |
| 3:49406095  | <i>IP6K2</i>    | BIOCARTA_INTEGRIN_PATHWAY     |
| 3:49424231  | <i>IP6K2</i>    | BIOCARTA_INTEGRIN_PATHWAY     |
| 3:49450137  | <i>IP6K2</i>    | BIOCARTA_INTEGRIN_PATHWAY     |
| 6:112137847 | <i>FYN</i>      | BIOCARTA_INTEGRIN_PATHWAY     |
| 6:112151452 | <i>FYN</i>      | BIOCARTA_INTEGRIN_PATHWAY     |
| 6:112175069 | <i>FYN</i>      | BIOCARTA_INTEGRIN_PATHWAY     |

|              |          |                               |
|--------------|----------|-------------------------------|
| 17:7479140   | V1NB1    | BIOCARTA_IRES_PATHWAY         |
| 17:7480325   | V1NB1    | BIOCARTA_IRES_PATHWAY         |
| 5:133558885  | C5orf24  | BIOCARTA_KERATINOCYTE_PATHWAY |
| 6:33287183   | HLA-DRB5 | BIOCARTA_KERATINOCYTE_PATHWAY |
| 17:43390763  | CRHR1_2  | BIOCARTA_KERATINOCYTE_PATHWAY |
| 16:30510571  | SETD1A   | BIOCARTA_LAIR_PATHWAY         |
| 16:30516492  | SETD1A   | BIOCARTA_LAIR_PATHWAY         |
| 16:30520856  | SETD1A   | BIOCARTA_LAIR_PATHWAY         |
| 6:31895092   | HLA-DRB5 | BIOCARTA_LECTIN_PATHWAY       |
| 6:31897219   | HLA-DRB5 | BIOCARTA_LECTIN_PATHWAY       |
| 12:122816734 | HIP1R    | BIOCARTA_LIS1_PATHWAY         |
| 12:122817580 | HIP1R    | BIOCARTA_LIS1_PATHWAY         |
| 12:122853197 | HIP1R    | BIOCARTA_LIS1_PATHWAY         |
| 17:7631694   | V1NB1    | BIOCARTA_LIS1_PATHWAY         |
| 17:7682605   | V1NB1    | BIOCARTA_LIS1_PATHWAY         |
| 16:30510571  | SETD1A   | BIOCARTA_LYM_PATHWAY          |
| 16:30516492  | SETD1A   | BIOCARTA_LYM_PATHWAY          |
| 16:30520856  | SETD1A   | BIOCARTA_LYM_PATHWAY          |
| 16:30510571  | SETD1A   | BIOCARTA_LYMPHOCYTE_PATHWAY   |
| 16:30516492  | SETD1A   | BIOCARTA_LYMPHOCYTE_PATHWAY   |
| 16:30520856  | SETD1A   | BIOCARTA_LYMPHOCYTE_PATHWAY   |
| 3:49406095   | IP6K2    | BIOCARTA_MAL_PATHWAY          |
| 3:49424231   | IP6K2    | BIOCARTA_MAL_PATHWAY          |
| 3:49450137   | IP6K2    | BIOCARTA_MAL_PATHWAY          |
| 2:102357447  | MAP4K4   | BIOCARTA_MAPK_PATHWAY         |
| 2:102379173  | MAP4K4   | BIOCARTA_MAPK_PATHWAY         |
| 2:102413116  | MAP4K4   | BIOCARTA_MAPK_PATHWAY         |
| 6:33287183   | HLA-DRB5 | BIOCARTA_MAPK_PATHWAY         |
| 17:43390763  | CRHR1_2  | BIOCARTA_MAPK_PATHWAY         |
| 18:48228968  | MEX3C    | BIOCARTA_MAPK_PATHWAY         |
| 3:48835245   | IP6K2    | BIOCARTA_MCALPAIN_PATHWAY     |
| 6:32789400   | HLA-DRB5 | BIOCARTA_MHC_PATHWAY          |
| 6:32791831   | HLA-DRB5 | BIOCARTA_MHC_PATHWAY          |
| 6:32797361   | HLA-DRB5 | BIOCARTA_MHC_PATHWAY          |
| 6:32802462   | HLA-DRB5 | BIOCARTA_MHC_PATHWAY          |
| 16:30510571  | SETD1A   | BIOCARTA_MONOCYTE_PATHWAY     |
| 16:30516492  | SETD1A   | BIOCARTA_MONOCYTE_PATHWAY     |
| 16:30520856  | SETD1A   | BIOCARTA_MONOCYTE_PATHWAY     |
| 3:48835245   | IP6K2    | BIOCARTA_MPR_PATHWAY          |
| 5:133558885  | C5orf24  | BIOCARTA_MTOR_PATHWAY         |
| 17:7479140   | V1NB1    | BIOCARTA_MTOR_PATHWAY         |
| 17:7480325   | V1NB1    | BIOCARTA_MTOR_PATHWAY         |
| 16:30510571  | SETD1A   | BIOCARTA_NEUTROPHIL_PATHWAY   |
| 16:30516492  | SETD1A   | BIOCARTA_NEUTROPHIL_PATHWAY   |
| 16:30520856  | SETD1A   | BIOCARTA_NEUTROPHIL_PATHWAY   |
| 3:48835245   | IP6K2    | BIOCARTA_NFAT_PATHWAY         |
| 8:11558567   | CTSB     | BIOCARTA_NFAT_PATHWAY         |
| 8:11599269   | CTSB     | BIOCARTA_NFAT_PATHWAY         |
| 2:102720323  | MAP4K4   | BIOCARTA_NFKB_PATHWAY         |
| 2:102783052  | MAP4K4   | BIOCARTA_NFKB_PATHWAY         |
| 17:43390763  | CRHR1_2  | BIOCARTA_NFKB_PATHWAY         |
| 3:48835245   | IP6K2    | BIOCARTA_NO1_PATHWAY          |
| 3:48835245   | IP6K2    | BIOCARTA_NOS1_PATHWAY         |

|              |          |                                |
|--------------|----------|--------------------------------|
| 17:7101771   | V1NB1    | BIOCARTA_NOS1_PATHWAY          |
| 17:43390763  | CRHR1_2  | BIOCARTA_NTHI_PATHWAY          |
| 12:39960237  | LRRK2_2  | BIOCARTA_NUCLEARRS_PATHWAY     |
| 5:133558885  | C5orf24  | BIOCARTA_P35ALZHEIMERS_PATHWAY |
| 6:33287183   | HLA-DRB5 | BIOCARTA_P38MAPK_PATHWAY       |
| 17:7578671   | V1NB1    | BIOCARTA_P53HYPOXIA_PATHWAY    |
| 17:7578671   | V1NB1    | BIOCARTA_P53_PATHWAY           |
| 3:49406095   | IP6K2    | BIOCARTA_PAR1_PATHWAY          |
| 3:49424231   | IP6K2    | BIOCARTA_PAR1_PATHWAY          |
| 3:49450137   | IP6K2    | BIOCARTA_PAR1_PATHWAY          |
| 4:90677243   | SNCA_2   | BIOCARTA_PARKIN_PATHWAY        |
| 4:90700329   | SNCA_2   | BIOCARTA_PARKIN_PATHWAY        |
| 4:90703993   | SNCA_2   | BIOCARTA_PARKIN_PATHWAY        |
| 4:90738839   | SNCA_2   | BIOCARTA_PARKIN_PATHWAY        |
| 4:90757294   | SNCA_2   | BIOCARTA_PARKIN_PATHWAY        |
| 1:204876966  | RAB29    | BIOCARTA_PDZS_PATHWAY          |
| 1:204940972  | RAB29    | BIOCARTA_PDZS_PATHWAY          |
| 11:83219006  | DLG2     | BIOCARTA_PDZS_PATHWAY          |
| 11:83232915  | DLG2     | BIOCARTA_PDZS_PATHWAY          |
| 11:83282740  | DLG2     | BIOCARTA_PDZS_PATHWAY          |
| 11:83387273  | DLG2     | BIOCARTA_PDZS_PATHWAY          |
| 11:83538733  | DLG2     | BIOCARTA_PDZS_PATHWAY          |
| 11:83544472  | DLG2     | BIOCARTA_PDZS_PATHWAY          |
| 11:83578152  | DLG2     | BIOCARTA_PDZS_PATHWAY          |
| 11:83647657  | DLG2     | BIOCARTA_PDZS_PATHWAY          |
| 11:83669903  | DLG2     | BIOCARTA_PDZS_PATHWAY          |
| 11:83736246  | DLG2     | BIOCARTA_PDZS_PATHWAY          |
| 11:83762918  | DLG2     | BIOCARTA_PDZS_PATHWAY          |
| 11:83823752  | DLG2     | BIOCARTA_PDZS_PATHWAY          |
| 11:83839992  | DLG2     | BIOCARTA_PDZS_PATHWAY          |
| 11:84104763  | DLG2     | BIOCARTA_PDZS_PATHWAY          |
| 11:84169039  | DLG2     | BIOCARTA_PDZS_PATHWAY          |
| 11:84221628  | DLG2     | BIOCARTA_PDZS_PATHWAY          |
| 11:84312008  | DLG2     | BIOCARTA_PDZS_PATHWAY          |
| 11:84324361  | DLG2     | BIOCARTA_PDZS_PATHWAY          |
| 11:84360346  | DLG2     | BIOCARTA_PDZS_PATHWAY          |
| 11:84403409  | DLG2     | BIOCARTA_PDZS_PATHWAY          |
| 17:7101771   | V1NB1    | BIOCARTA_PDZS_PATHWAY          |
| 17:42423844  | FAM171A2 | BIOCARTA_PEPI_PATHWAY          |
| 17:42426940  | FAM171A2 | BIOCARTA_PEPI_PATHWAY          |
| 3:48835245   | IP6K2    | BIOCARTA_PLCE_PATHWAY          |
| 17:7578671   | V1NB1    | BIOCARTA_PLK3_PATHWAY          |
| 6:33287183   | HLA-DRB5 | BIOCARTA_PML_PATHWAY           |
| 17:7578671   | V1NB1    | BIOCARTA_PML_PATHWAY           |
| 3:48835245   | IP6K2    | BIOCARTA_PPARG_PATHWAY         |
| 17:40392358  | RETBG3   | BIOCARTA_PPARG_PATHWAY         |
| 17:42990894  | CRHR1_2  | BIOCARTA_PRION_PATHWAY         |
| 10:103185542 | GBF1     | BIOCARTA_PS1_PATHWAY           |
| 10:103305087 | GBF1     | BIOCARTA_PS1_PATHWAY           |
| 10:103308244 | GBF1     | BIOCARTA_PS1_PATHWAY           |
| 3:48199695   | IP6K2    | BIOCARTA_PTC1_PATHWAY          |
| 3:48214438   | IP6K2    | BIOCARTA_PTC1_PATHWAY          |
| 1:155975202  | GBAP1    | BIOCARTA_PTDINS_PATHWAY        |

|              |                |                             |
|--------------|----------------|-----------------------------|
| 6:73383348   | <i>RIMS1</i>   | BIOCARTA_RACC_PATHWAY       |
| 6:73448086   | <i>RIMS1</i>   | BIOCARTA_RACC_PATHWAY       |
| 3:49406095   | <i>IP6K2</i>   | BIOCARTA_RACCYCD_PATHWAY    |
| 3:49424231   | <i>IP6K2</i>   | BIOCARTA_RACCYCD_PATHWAY    |
| 3:49450137   | <i>IP6K2</i>   | BIOCARTA_RACCYCD_PATHWAY    |
| 3:49406095   | <i>IP6K2</i>   | BIOCARTA_RAS_PATHWAY        |
| 3:49424231   | <i>IP6K2</i>   | BIOCARTA_RAS_PATHWAY        |
| 3:49450137   | <i>IP6K2</i>   | BIOCARTA_RAS_PATHWAY        |
| 3:48199695   | <i>IP6K2</i>   | BIOCARTA_RB_PATHWAY         |
| 3:48214438   | <i>IP6K2</i>   | BIOCARTA_RB_PATHWAY         |
| 17:7578671   | <i>V1NB1</i>   | BIOCARTA_RB_PATHWAY         |
| 17:76869878  | <i>DNAH17</i>  | BIOCARTA_RECK_PATHWAY       |
| 6:112137847  | <i>FYN</i>     | BIOCARTA_REELIN_PATHWAY     |
| 6:112151452  | <i>FYN</i>     | BIOCARTA_REELIN_PATHWAY     |
| 6:112175069  | <i>FYN</i>     | BIOCARTA_REELIN_PATHWAY     |
| 3:49406095   | <i>IP6K2</i>   | BIOCARTA_RHO_PATHWAY        |
| 3:49424231   | <i>IP6K2</i>   | BIOCARTA_RHO_PATHWAY        |
| 3:49450137   | <i>IP6K2</i>   | BIOCARTA_RHO_PATHWAY        |
| 17:7578671   | <i>V1NB1</i>   | BIOCARTA_RNA_PATHWAY        |
| 17:43390763  | <i>CRHR1_2</i> | BIOCARTA_RNA_PATHWAY        |
| 3:48835245   | <i>IP6K2</i>   | BIOCARTA_SHH_PATHWAY        |
| 10:104278055 | <i>GBF1</i>    | BIOCARTA_SHH_PATHWAY        |
| 10:104305501 | <i>GBF1</i>    | BIOCARTA_SHH_PATHWAY        |
| 21:38740824  | <i>DYRK1A</i>  | BIOCARTA_SHH_PATHWAY        |
| 21:38753354  | <i>DYRK1A</i>  | BIOCARTA_SHH_PATHWAY        |
| 21:38770530  | <i>DYRK1A</i>  | BIOCARTA_SHH_PATHWAY        |
| 21:38783614  | <i>DYRK1A</i>  | BIOCARTA_SHH_PATHWAY        |
| 21:38814867  | <i>DYRK1A</i>  | BIOCARTA_SHH_PATHWAY        |
| 3:48199695   | <i>IP6K2</i>   | BIOCARTA_SRCRPTP_PATHWAY    |
| 3:48214438   | <i>IP6K2</i>   | BIOCARTA_SRCRPTP_PATHWAY    |
| 3:48835245   | <i>IP6K2</i>   | BIOCARTA_STATHMIN_PATHWAY   |
| 17:43390763  | <i>CRHR1_2</i> | BIOCARTA_STRESS_PATHWAY     |
| 17:7455536   | <i>V1NB1</i>   | BIOCARTA_TALL1_PATHWAY      |
| 17:43390763  | <i>CRHR1_2</i> | BIOCARTA_TALL1_PATHWAY      |
| 6:112137847  | <i>FYN</i>     | BIOCARTA_TCRA_PATHWAY       |
| 6:112151452  | <i>FYN</i>     | BIOCARTA_TCRA_PATHWAY       |
| 6:112175069  | <i>FYN</i>     | BIOCARTA_TCRA_PATHWAY       |
| 6:112137847  | <i>FYN</i>     | BIOCARTA_TCR_PATHWAY        |
| 6:112151452  | <i>FYN</i>     | BIOCARTA_TCR_PATHWAY        |
| 6:112175069  | <i>FYN</i>     | BIOCARTA_TCR_PATHWAY        |
| 16:30510571  | <i>SETD1A</i>  | BIOCARTA_TCYTOTOXIC_PATHWAY |
| 16:30516492  | <i>SETD1A</i>  | BIOCARTA_TCYTOTOXIC_PATHWAY |
| 16:30520856  | <i>SETD1A</i>  | BIOCARTA_TCYTOTOXIC_PATHWAY |
| 5:133558885  | <i>C5orf24</i> | BIOCARTA_TEL_PATHWAY        |
| 17:7578671   | <i>V1NB1</i>   | BIOCARTA_TEL_PATHWAY        |
| 17:7578671   | <i>V1NB1</i>   | BIOCARTA_TERT_PATHWAY       |
| 3:49406095   | <i>IP6K2</i>   | BIOCARTA_TFF_PATHWAY        |
| 3:49424231   | <i>IP6K2</i>   | BIOCARTA_TFF_PATHWAY        |
| 3:49450137   | <i>IP6K2</i>   | BIOCARTA_TFF_PATHWAY        |
| 16:30510571  | <i>SETD1A</i>  | BIOCARTA_THELPER_PATHWAY    |
| 16:30516492  | <i>SETD1A</i>  | BIOCARTA_THELPER_PATHWAY    |
| 16:30520856  | <i>SETD1A</i>  | BIOCARTA_THELPER_PATHWAY    |
| 17:7578671   | <i>V1NB1</i>   | BIOCARTA_TID_PATHWAY        |

|              |                 |                                                |
|--------------|-----------------|------------------------------------------------|
| 1:156059276  | <i>GBAP1</i>    | BIOCARTA_TNFR1_PATHWAY                         |
| 1:226568665  | <i>ITPKB</i>    | BIOCARTA_TNFR1_PATHWAY                         |
| 17:43390763  | <i>CRHR1_2</i>  | BIOCARTA_TNFR2_PATHWAY                         |
| 17:43390763  | <i>CRHR1_2</i>  | BIOCARTA_TOLL_PATHWAY                          |
| 17:40392358  | <i>RETREG3</i>  | BIOCARTA_TPO_PATHWAY                           |
| 6:112137847  | <i>FYN</i>      | BIOCARTA_TSP1_PATHWAY                          |
| 6:112151452  | <i>FYN</i>      | BIOCARTA_TSP1_PATHWAY                          |
| 6:112175069  | <i>FYN</i>      | BIOCARTA_TSP1_PATHWAY                          |
| 3:49406095   | <i>IP6K2</i>    | BIOCARTA_UCALPAIN_PATHWAY                      |
| 3:49424231   | <i>IP6K2</i>    | BIOCARTA_UCALPAIN_PATHWAY                      |
| 3:49450137   | <i>IP6K2</i>    | BIOCARTA_UCALPAIN_PATHWAY                      |
| 3:48835245   | <i>IP6K2</i>    | BIOCARTA_VIP_PATHWAY                           |
| 5:133558885  | <i>C5orf24</i>  | BIOCARTA_WNT_PATHWAY                           |
| 10:103185542 | <i>GBF1</i>     | BIOCARTA_WNT_PATHWAY                           |
| 10:103305087 | <i>GBF1</i>     | BIOCARTA_WNT_PATHWAY                           |
| 10:103308244 | <i>GBF1</i>     | BIOCARTA_WNT_PATHWAY                           |
| 6:32789400   | <i>HLA-DRB5</i> | KEGG_ABC_TRANSPORTERS                          |
| 6:32791831   | <i>HLA-DRB5</i> | KEGG_ABC_TRANSPORTERS                          |
| 6:32797361   | <i>HLA-DRB5</i> | KEGG_ABC_TRANSPORTERS                          |
| 6:32802462   | <i>HLA-DRB5</i> | KEGG_ABC_TRANSPORTERS                          |
| 12:39960237  | <i>LRRK2_2</i>  | KEGG_ABC_TRANSPORTERS                          |
| 12:123453034 | <i>HIP1R</i>    | KEGG_ABC_TRANSPORTERS                          |
| 14:74764925  | <i>RPS6KL1</i>  | KEGG_ABC_TRANSPORTERS                          |
| 17:39883520  | <i>RETREG3</i>  | KEGG_ACUTE_MYELOID_LEUKEMIA                    |
| 17:40392358  | <i>RETREG3</i>  | KEGG_ACUTE_MYELOID_LEUKEMIA                    |
| 3:49406095   | <i>IP6K2</i>    | KEGG_ADHERENS_JUNCTION                         |
| 3:49424231   | <i>IP6K2</i>    | KEGG_ADHERENS_JUNCTION                         |
| 3:49450137   | <i>IP6K2</i>    | KEGG_ADHERENS_JUNCTION                         |
| 6:112137847  | <i>FYN</i>      | KEGG_ADHERENS_JUNCTION                         |
| 6:112151452  | <i>FYN</i>      | KEGG_ADHERENS_JUNCTION                         |
| 6:112175069  | <i>FYN</i>      | KEGG_ADHERENS_JUNCTION                         |
| 17:41056283  | <i>RETREG3</i>  | KEGG_ADIPOCYTOKINE_SIGNALING_PATHWAY           |
| 17:7560294   | <i>V1NB1</i>    | KEGG_ALDOSTERONE_REGULATED_SODIUM_REABSORPTION |
| 6:29798642   | <i>TRIM40</i>   | KEGG_ALLOGRAFT_REJECTION                       |
| 6:32602372   | <i>HLA-DRB5</i> | KEGG_ALLOGRAFT_REJECTION                       |
| 6:32930679   | <i>HLA-DRB5</i> | KEGG_ALLOGRAFT_REJECTION                       |
| 6:32934409   | <i>HLA-DRB5</i> | KEGG_ALLOGRAFT_REJECTION                       |
| 6:32973303   | <i>HLA-DRB5</i> | KEGG_ALLOGRAFT_REJECTION                       |
| 6:32974268   | <i>HLA-DRB5</i> | KEGG_ALLOGRAFT_REJECTION                       |
| 1:161171736  | <i>FCGR2A</i>   | KEGG_ALZHEIMERS_DISEASE                        |
| 1:161875645  | <i>FCGR2A</i>   | KEGG_ALZHEIMERS_DISEASE                        |
| 1:161930954  | <i>FCGR2A</i>   | KEGG_ALZHEIMERS_DISEASE                        |
| 1:227067656  | <i>ITPKB</i>    | KEGG_ALZHEIMERS_DISEASE                        |
| 4:90677243   | <i>SNCA_2</i>   | KEGG_ALZHEIMERS_DISEASE                        |
| 4:90700329   | <i>SNCA_2</i>   | KEGG_ALZHEIMERS_DISEASE                        |
| 4:90703993   | <i>SNCA_2</i>   | KEGG_ALZHEIMERS_DISEASE                        |
| 4:90738839   | <i>SNCA_2</i>   | KEGG_ALZHEIMERS_DISEASE                        |
| 4:90757294   | <i>SNCA_2</i>   | KEGG_ALZHEIMERS_DISEASE                        |
| 17:43999203  | <i>WNT3</i>     | KEGG_ALZHEIMERS_DISEASE                        |
| 17:44005297  | <i>WNT3</i>     | KEGG_ALZHEIMERS_DISEASE                        |
| 17:44019712  | <i>WNT3</i>     | KEGG_ALZHEIMERS_DISEASE                        |
| 17:44060492  | <i>WNT3</i>     | KEGG_ALZHEIMERS_DISEASE                        |
| 17:44065263  | <i>WNT3</i>     | KEGG_ALZHEIMERS_DISEASE                        |

|             |          |                                                           |
|-------------|----------|-----------------------------------------------------------|
| 17:44081178 | WNT3     | KEGG_ALZHEIMERS_DISEASE                                   |
| 17:44083297 | WNT3     | KEGG_ALZHEIMERS_DISEASE                                   |
| 6:31758240  | HLA-DRB5 | KEGG_AMINOACYL_TRNA_BIOSYNTHESIS                          |
| 6:31762311  | HLA-DRB5 | KEGG_AMINOACYL_TRNA_BIOSYNTHESIS                          |
| 6:33287183  | HLA-DRB5 | KEGG_AMYOTROPHIC_LATERAL_SCLEROSIS_ALS                    |
| 17:7578671  | V1NB1    | KEGG_AMYOTROPHIC_LATERAL_SCLEROSIS_ALS                    |
| 6:29798642  | TRIM40   | KEGG_ANTIGEN_PROCESSING_AND_PRESENTATION                  |
| 6:32602372  | HLA-DRB5 | KEGG_ANTIGEN_PROCESSING_AND_PRESENTATION                  |
| 6:32789400  | HLA-DRB5 | KEGG_ANTIGEN_PROCESSING_AND_PRESENTATION                  |
| 6:32791831  | HLA-DRB5 | KEGG_ANTIGEN_PROCESSING_AND_PRESENTATION                  |
| 6:32797361  | HLA-DRB5 | KEGG_ANTIGEN_PROCESSING_AND_PRESENTATION                  |
| 6:32802462  | HLA-DRB5 | KEGG_ANTIGEN_PROCESSING_AND_PRESENTATION                  |
| 6:32930679  | HLA-DRB5 | KEGG_ANTIGEN_PROCESSING_AND_PRESENTATION                  |
| 6:32934409  | HLA-DRB5 | KEGG_ANTIGEN_PROCESSING_AND_PRESENTATION                  |
| 6:32973303  | HLA-DRB5 | KEGG_ANTIGEN_PROCESSING_AND_PRESENTATION                  |
| 6:32974268  | HLA-DRB5 | KEGG_ANTIGEN_PROCESSING_AND_PRESENTATION                  |
| 8:11712443  | CTSB     | KEGG_ANTIGEN_PROCESSING_AND_PRESENTATION                  |
| 2:102720323 | MAP4K4   | KEGG_APOPTOSIS                                            |
| 2:102783052 | MAP4K4   | KEGG_APOPTOSIS                                            |
| 3:48835245  | IP6K2    | KEGG_APOPTOSIS                                            |
| 8:22974278  | BIN3     | KEGG_APOPTOSIS                                            |
| 8:23050400  | BIN3     | KEGG_APOPTOSIS                                            |
| 17:7578671  | V1NB1    | KEGG_APOPTOSIS                                            |
| 17:43390763 | CRHR1_2  | KEGG_APOPTOSIS                                            |
| 17:7983799  | V1NB1    | KEGG_ARACHIDONIC_ACID_METABOLISM                          |
| 1:226108200 | ITPKB    | KEGG_ARGININE_AND_PROLINE_METABOLISM                      |
| 4:17606956  | LCORL    | KEGG_ARGININE_AND_PROLINE_METABOLISM                      |
| 1:156059276 | GBAP1    | KEGG_ARRHYTHMOGENIC_RIGHT_VENTRICULAR_CARDIOMYOPATHY_ARVC |
| 3:49561208  | IP6K2    | KEGG_ARRHYTHMOGENIC_RIGHT_VENTRICULAR_CARDIOMYOPATHY_ARVC |
| 10:15562608 | ITGA8    | KEGG_ARRHYTHMOGENIC_RIGHT_VENTRICULAR_CARDIOMYOPATHY_ARVC |
| 10:15569598 | ITGA8    | KEGG_ARRHYTHMOGENIC_RIGHT_VENTRICULAR_CARDIOMYOPATHY_ARVC |
| 10:15652368 | ITGA8    | KEGG_ARRHYTHMOGENIC_RIGHT_VENTRICULAR_CARDIOMYOPATHY_ARVC |
| 17:39883520 | RETEG3   | KEGG_ARRHYTHMOGENIC_RIGHT_VENTRICULAR_CARDIOMYOPATHY_ARVC |
| 17:42454243 | FAM171A2 | KEGG_ARRHYTHMOGENIC_RIGHT_VENTRICULAR_CARDIOMYOPATHY_ARVC |
| 6:32602372  | HLA-DRB5 | KEGG_ASTHMA                                               |
| 6:32930679  | HLA-DRB5 | KEGG_ASTHMA                                               |
| 6:32934409  | HLA-DRB5 | KEGG_ASTHMA                                               |
| 6:32973303  | HLA-DRB5 | KEGG_ASTHMA                                               |
| 6:32974268  | HLA-DRB5 | KEGG_ASTHMA                                               |
| 6:29798642  | TRIM40   | KEGG_AUTOIMMUNE_THYROID_DISEASE                           |
| 6:32602372  | HLA-DRB5 | KEGG_AUTOIMMUNE_THYROID_DISEASE                           |
| 6:32930679  | HLA-DRB5 | KEGG_AUTOIMMUNE_THYROID_DISEASE                           |
| 6:32934409  | HLA-DRB5 | KEGG_AUTOIMMUNE_THYROID_DISEASE                           |
| 6:32973303  | HLA-DRB5 | KEGG_AUTOIMMUNE_THYROID_DISEASE                           |
| 6:32974268  | HLA-DRB5 | KEGG_AUTOIMMUNE_THYROID_DISEASE                           |
| 3:49406095  | IP6K2    | KEGG_AXON_GUIDANCE                                        |
| 3:49424231  | IP6K2    | KEGG_AXON_GUIDANCE                                        |
| 3:49450137  | IP6K2    | KEGG_AXON_GUIDANCE                                        |
| 3:122645304 | KPNA1    | KEGG_AXON_GUIDANCE                                        |
| 3:122720608 | KPNA1    | KEGG_AXON_GUIDANCE                                        |
| 6:112137847 | FYN      | KEGG_AXON_GUIDANCE                                        |
| 6:112151452 | FYN      | KEGG_AXON_GUIDANCE                                        |
| 6:112175069 | FYN      | KEGG_AXON_GUIDANCE                                        |

|              |                 |                                   |
|--------------|-----------------|-----------------------------------|
| 10:104278055 | <i>GBF1</i>     | KEGG_BASAL_CELL_CARCINOMA         |
| 10:104305501 | <i>GBF1</i>     | KEGG_BASAL_CELL_CARCINOMA         |
| 17:7129974   | <i>V1NB1</i>    | KEGG_BASAL_CELL_CARCINOMA         |
| 17:7578671   | <i>V1NB1</i>    | KEGG_BASAL_CELL_CARCINOMA         |
| 17:44843651  | <i>WNT3</i>     | KEGG_BASAL_CELL_CARCINOMA         |
| 17:44870978  | <i>WNT3</i>     | KEGG_BASAL_CELL_CARCINOMA         |
| 17:44871422  | <i>WNT3</i>     | KEGG_BASAL_CELL_CARCINOMA         |
| 17:44888209  | <i>WNT3</i>     | KEGG_BASAL_CELL_CARCINOMA         |
| 17:44888715  | <i>WNT3</i>     | KEGG_BASAL_CELL_CARCINOMA         |
| 17:44906949  | <i>WNT3</i>     | KEGG_BASAL_CELL_CARCINOMA         |
| 17:44912901  | <i>WNT3</i>     | KEGG_BASAL_CELL_CARCINOMA         |
| 17:44931399  | <i>WNT3</i>     | KEGG_BASAL_CELL_CARCINOMA         |
| 17:44947756  | <i>WNT3</i>     | KEGG_BASAL_CELL_CARCINOMA         |
| 14:55902186  | <i>GCH1</i>     | KEGG_BASAL_TRANSCRIPTION_FACTORS  |
| 1:226568665  | <i>ITPKB</i>    | KEGG_BASE_EXCISION_REPAIR         |
| 12:133206648 | <i>FBRSL1</i>   | KEGG_BASE_EXCISION_REPAIR         |
| 12:133223685 | <i>FBRSL1</i>   | KEGG_BASE_EXCISION_REPAIR         |
| 17:7578671   | <i>V1NB1</i>    | KEGG_BLADDER_CANCER               |
| 1:226907849  | <i>ITPKB</i>    | KEGG_CALCIUM_SIGNALING_PATHWAY    |
| 1:226910340  | <i>ITPKB</i>    | KEGG_CALCIUM_SIGNALING_PATHWAY    |
| 1:226916078  | <i>ITPKB</i>    | KEGG_CALCIUM_SIGNALING_PATHWAY    |
| 4:15709252   | <i>BST1</i>     | KEGG_CALCIUM_SIGNALING_PATHWAY    |
| 4:15713608   | <i>BST1</i>     | KEGG_CALCIUM_SIGNALING_PATHWAY    |
| 4:15724372   | <i>BST1</i>     | KEGG_CALCIUM_SIGNALING_PATHWAY    |
| 4:15737882   | <i>BST1</i>     | KEGG_CALCIUM_SIGNALING_PATHWAY    |
| 4:15789288   | <i>BST1</i>     | KEGG_CALCIUM_SIGNALING_PATHWAY    |
| 4:15816670   | <i>BST1</i>     | KEGG_CALCIUM_SIGNALING_PATHWAY    |
| 4:15829612   | <i>BST1</i>     | KEGG_CALCIUM_SIGNALING_PATHWAY    |
| 4:114424939  | <i>CAMK2D</i>   | KEGG_CALCIUM_SIGNALING_PATHWAY    |
| 4:114494052  | <i>CAMK2D</i>   | KEGG_CALCIUM_SIGNALING_PATHWAY    |
| 4:114529492  | <i>CAMK2D</i>   | KEGG_CALCIUM_SIGNALING_PATHWAY    |
| 4:114539964  | <i>CAMK2D</i>   | KEGG_CALCIUM_SIGNALING_PATHWAY    |
| 4:114597918  | <i>CAMK2D</i>   | KEGG_CALCIUM_SIGNALING_PATHWAY    |
| 8:131799767  | <i>FAM49B</i>   | KEGG_CALCIUM_SIGNALING_PATHWAY    |
| 8:131845512  | <i>FAM49B</i>   | KEGG_CALCIUM_SIGNALING_PATHWAY    |
| 8:131865425  | <i>FAM49B</i>   | KEGG_CALCIUM_SIGNALING_PATHWAY    |
| 8:131901170  | <i>FAM49B</i>   | KEGG_CALCIUM_SIGNALING_PATHWAY    |
| 16:50300511  | <i>CASC16</i>   | KEGG_CALCIUM_SIGNALING_PATHWAY    |
| 16:50317039  | <i>CASC16</i>   | KEGG_CALCIUM_SIGNALING_PATHWAY    |
| 17:43195981  | <i>CRHR1_2</i>  | KEGG_CALCIUM_SIGNALING_PATHWAY    |
| 19:3142784   | <i>SPPL2B</i>   | KEGG_CALCIUM_SIGNALING_PATHWAY    |
| 19:3147326   | <i>SPPL2B</i>   | KEGG_CALCIUM_SIGNALING_PATHWAY    |
| 17:7560294   | <i>V1NB1</i>    | KEGG_CARDIAC_MUSCLE_CONTRACTION   |
| 1:204876966  | <i>RAB29</i>    | KEGG_CELL_ADHESION_MOLECULES_CAMS |
| 1:204940972  | <i>RAB29</i>    | KEGG_CELL_ADHESION_MOLECULES_CAMS |
| 6:29798642   | <i>TRIM40</i>   | KEGG_CELL_ADHESION_MOLECULES_CAMS |
| 6:32602372   | <i>HLA-DRB5</i> | KEGG_CELL_ADHESION_MOLECULES_CAMS |
| 6:32930679   | <i>HLA-DRB5</i> | KEGG_CELL_ADHESION_MOLECULES_CAMS |
| 6:32934409   | <i>HLA-DRB5</i> | KEGG_CELL_ADHESION_MOLECULES_CAMS |
| 6:32973303   | <i>HLA-DRB5</i> | KEGG_CELL_ADHESION_MOLECULES_CAMS |
| 6:32974268   | <i>HLA-DRB5</i> | KEGG_CELL_ADHESION_MOLECULES_CAMS |
| 10:15562608  | <i>ITGA8</i>    | KEGG_CELL_ADHESION_MOLECULES_CAMS |
| 10:15569598  | <i>ITGA8</i>    | KEGG_CELL_ADHESION_MOLECULES_CAMS |

|              |                     |                                   |
|--------------|---------------------|-----------------------------------|
| 10:15652368  | <i>ITGA8</i>        | KEGG_CELL_ADHESION_MOLECULES_CAMS |
| 11:133947732 | <i>IGSF9B</i>       | KEGG_CELL_ADHESION_MOLECULES_CAMS |
| 12:41144387  | <i>LRRK2_2</i>      | KEGG_CELL_ADHESION_MOLECULES_CAMS |
| 12:41147295  | <i>LRRK2_2</i>      | KEGG_CELL_ADHESION_MOLECULES_CAMS |
| 12:41195135  | <i>LRRK2_2</i>      | KEGG_CELL_ADHESION_MOLECULES_CAMS |
| 12:41251554  | <i>LRRK2_2</i>      | KEGG_CELL_ADHESION_MOLECULES_CAMS |
| 12:41255129  | <i>LRRK2_2</i>      | KEGG_CELL_ADHESION_MOLECULES_CAMS |
| 12:41297969  | <i>LRRK2_2</i>      | KEGG_CELL_ADHESION_MOLECULES_CAMS |
| 12:41407403  | <i>LRRK2_2</i>      | KEGG_CELL_ADHESION_MOLECULES_CAMS |
| 16:30510571  | <i>SETD1A</i>       | KEGG_CELL_ADHESION_MOLECULES_CAMS |
| 16:30516492  | <i>SETD1A</i>       | KEGG_CELL_ADHESION_MOLECULES_CAMS |
| 16:30520856  | <i>SETD1A</i>       | KEGG_CELL_ADHESION_MOLECULES_CAMS |
| 21:37854286  | <i>DYRK1A</i>       | KEGG_CELL_ADHESION_MOLECULES_CAMS |
| 21:37859449  | <i>DYRK1A</i>       | KEGG_CELL_ADHESION_MOLECULES_CAMS |
| 21:37860785  | <i>DYRK1A</i>       | KEGG_CELL_ADHESION_MOLECULES_CAMS |
| 21:37894089  | <i>DYRK1A</i>       | KEGG_CELL_ADHESION_MOLECULES_CAMS |
| 21:37899076  | <i>DYRK1A</i>       | KEGG_CELL_ADHESION_MOLECULES_CAMS |
| 3:48199695   | <i>IP6K2</i>        | KEGG_CELL_CYCLE                   |
| 3:48214438   | <i>IP6K2</i>        | KEGG_CELL_CYCLE                   |
| 17:7578671   | <i>V1NB1</i>        | KEGG_CELL_CYCLE                   |
| 17:45215865  | <i>WNT3</i>         | KEGG_CELL_CYCLE                   |
| 17:45244822  | <i>WNT3</i>         | KEGG_CELL_CYCLE                   |
| 19:2477820   | <i>SPPL2B</i>       | KEGG_CELL_CYCLE                   |
| 3:49406095   | <i>IP6K2</i>        | KEGG_CHEMOKINE_SIGNALING_PATHWAY  |
| 3:49424231   | <i>IP6K2</i>        | KEGG_CHEMOKINE_SIGNALING_PATHWAY  |
| 3:49450137   | <i>IP6K2</i>        | KEGG_CHEMOKINE_SIGNALING_PATHWAY  |
| 3:123089448  | <i>KPNA1</i>        | KEGG_CHEMOKINE_SIGNALING_PATHWAY  |
| 4:76924571   | <i>FAM47E-STBD1</i> | KEGG_CHEMOKINE_SIGNALING_PATHWAY  |
| 8:131799767  | <i>FAM49B</i>       | KEGG_CHEMOKINE_SIGNALING_PATHWAY  |
| 8:131845512  | <i>FAM49B</i>       | KEGG_CHEMOKINE_SIGNALING_PATHWAY  |
| 8:131865425  | <i>FAM49B</i>       | KEGG_CHEMOKINE_SIGNALING_PATHWAY  |
| 8:131901170  | <i>FAM49B</i>       | KEGG_CHEMOKINE_SIGNALING_PATHWAY  |
| 10:121054578 | <i>INPP5F</i>       | KEGG_CHEMOKINE_SIGNALING_PATHWAY  |
| 10:121077191 | <i>INPP5F</i>       | KEGG_CHEMOKINE_SIGNALING_PATHWAY  |
| 10:121085648 | <i>INPP5F</i>       | KEGG_CHEMOKINE_SIGNALING_PATHWAY  |
| 10:121104943 | <i>INPP5F</i>       | KEGG_CHEMOKINE_SIGNALING_PATHWAY  |
| 10:121114292 | <i>INPP5F</i>       | KEGG_CHEMOKINE_SIGNALING_PATHWAY  |
| 10:121191186 | <i>INPP5F</i>       | KEGG_CHEMOKINE_SIGNALING_PATHWAY  |
| 10:121201427 | <i>INPP5F</i>       | KEGG_CHEMOKINE_SIGNALING_PATHWAY  |
| 16:50300511  | <i>CASC16</i>       | KEGG_CHEMOKINE_SIGNALING_PATHWAY  |
| 16:50317039  | <i>CASC16</i>       | KEGG_CHEMOKINE_SIGNALING_PATHWAY  |
| 17:40392358  | <i>RETREG3</i>      | KEGG_CHEMOKINE_SIGNALING_PATHWAY  |
| 19:2557113   | <i>SPPL2B</i>       | KEGG_CHEMOKINE_SIGNALING_PATHWAY  |
| 19:2563327   | <i>SPPL2B</i>       | KEGG_CHEMOKINE_SIGNALING_PATHWAY  |
| 19:2580057   | <i>SPPL2B</i>       | KEGG_CHEMOKINE_SIGNALING_PATHWAY  |
| 19:2660983   | <i>SPPL2B</i>       | KEGG_CHEMOKINE_SIGNALING_PATHWAY  |
| 17:7578671   | <i>V1NB1</i>        | KEGG_CHRONIC_MYELOID_LEUKEMIA     |
| 17:40392358  | <i>RETREG3</i>      | KEGG_CHRONIC_MYELOID_LEUKEMIA     |
| 2:101439596  | <i>MAP4K4</i>       | KEGG_CIRCADIAN_RHYTHM_MAMMAL      |
| 2:101464631  | <i>MAP4K4</i>       | KEGG_CIRCADIAN_RHYTHM_MAMMAL      |
| 2:101547064  | <i>MAP4K4</i>       | KEGG_CIRCADIAN_RHYTHM_MAMMAL      |
| 2:101550181  | <i>MAP4K4</i>       | KEGG_CIRCADIAN_RHYTHM_MAMMAL      |
| 2:101578010  | <i>MAP4K4</i>       | KEGG_CIRCADIAN_RHYTHM_MAMMAL      |

|              |              |                                             |
|--------------|--------------|---------------------------------------------|
| 2:101603812  | MAP4K4       | KEGG_CIRCADIEN_RHYTHM_MAMMAL                |
| 3:49406095   | IP6K2        | KEGG_COLORECTAL_CANCER                      |
| 3:49424231   | IP6K2        | KEGG_COLORECTAL_CANCER                      |
| 3:49450137   | IP6K2        | KEGG_COLORECTAL_CANCER                      |
| 17:7578671   | V1NB1        | KEGG_COLORECTAL_CANCER                      |
| 6:31897219   | HLA-DRB5     | KEGG_COMPLEMENT_AND_COAGULATION_CASCADES    |
| 2:102612026  | MAP4K4       | KEGG_CYTOKINE_CYTOKINE_RECEPTOR_INTERACTION |
| 2:102621855  | MAP4K4       | KEGG_CYTOKINE_CYTOKINE_RECEPTOR_INTERACTION |
| 2:102631503  | MAP4K4       | KEGG_CYTOKINE_CYTOKINE_RECEPTOR_INTERACTION |
| 2:102633387  | MAP4K4       | KEGG_CYTOKINE_CYTOKINE_RECEPTOR_INTERACTION |
| 2:102720323  | MAP4K4       | KEGG_CYTOKINE_CYTOKINE_RECEPTOR_INTERACTION |
| 2:102783052  | MAP4K4       | KEGG_CYTOKINE_CYTOKINE_RECEPTOR_INTERACTION |
| 2:103047986  | MAP4K4       | KEGG_CYTOKINE_CYTOKINE_RECEPTOR_INTERACTION |
| 2:103063855  | MAP4K4       | KEGG_CYTOKINE_CYTOKINE_RECEPTOR_INTERACTION |
| 2:103066346  | MAP4K4       | KEGG_CYTOKINE_CYTOKINE_RECEPTOR_INTERACTION |
| 4:76924571   | FAM47E-STBD1 | KEGG_CYTOKINE_CYTOKINE_RECEPTOR_INTERACTION |
| 8:22974278   | BIN3         | KEGG_CYTOKINE_CYTOKINE_RECEPTOR_INTERACTION |
| 8:23050400   | BIN3         | KEGG_CYTOKINE_CYTOKINE_RECEPTOR_INTERACTION |
| 19:2251817   | SPPL2B       | KEGG_CYTOKINE_CYTOKINE_RECEPTOR_INTERACTION |
| 8:22108784   | BIN3         | KEGG_CYTOSOLIC_DNA_SENSING_PATHWAY          |
| 1:156059276  | GBAP1        | KEGG_DILATED_CARDIOMYOPATHY                 |
| 3:49561208   | IP6K2        | KEGG_DILATED_CARDIOMYOPATHY                 |
| 3:123089448  | KPNA1        | KEGG_DILATED_CARDIOMYOPATHY                 |
| 8:131799767  | FAM49B       | KEGG_DILATED_CARDIOMYOPATHY                 |
| 8:131845512  | FAM49B       | KEGG_DILATED_CARDIOMYOPATHY                 |
| 8:131865425  | FAM49B       | KEGG_DILATED_CARDIOMYOPATHY                 |
| 8:131901170  | FAM49B       | KEGG_DILATED_CARDIOMYOPATHY                 |
| 10:15562608  | ITGA8        | KEGG_DILATED_CARDIOMYOPATHY                 |
| 10:15569598  | ITGA8        | KEGG_DILATED_CARDIOMYOPATHY                 |
| 10:15652368  | ITGA8        | KEGG_DILATED_CARDIOMYOPATHY                 |
| 16:50300511  | CASC16       | KEGG_DILATED_CARDIOMYOPATHY                 |
| 16:50317039  | CASC16       | KEGG_DILATED_CARDIOMYOPATHY                 |
| 17:42454243  | FAM171A2     | KEGG_DILATED_CARDIOMYOPATHY                 |
| 12:133206648 | FBRSL1       | KEGG_DNA_REPLICATION                        |
| 12:133223685 | FBRSL1       | KEGG_DNA_REPLICATION                        |
| 6:32179319   | HLA-DRB5     | KEGG_DORSO_VENTRAL_AXIS_FORMATION           |
| 6:32186193   | HLA-DRB5     | KEGG_DORSO_VENTRAL_AXIS_FORMATION           |
| 7:65425894   | GS1-124K5.11 | KEGG_DRUG_METABOLISM_OTHER_ENZYMES          |
| 17:76177567  | DNAH17       | KEGG_DRUG_METABOLISM_OTHER_ENZYMES          |
| 3:49162284   | IP6K2        | KEGG_ECM_RECEPTOR_INTERACTION               |
| 3:49162583   | IP6K2        | KEGG_ECM_RECEPTOR_INTERACTION               |
| 3:49561208   | IP6K2        | KEGG_ECM_RECEPTOR_INTERACTION               |
| 6:32031904   | HLA-DRB5     | KEGG_ECM_RECEPTOR_INTERACTION               |
| 6:32062687   | HLA-DRB5     | KEGG_ECM_RECEPTOR_INTERACTION               |
| 6:33153528   | HLA-DRB5     | KEGG_ECM_RECEPTOR_INTERACTION               |
| 6:112494762  | FYN          | KEGG_ECM_RECEPTOR_INTERACTION               |
| 6:112531401  | FYN          | KEGG_ECM_RECEPTOR_INTERACTION               |
| 6:112561154  | FYN          | KEGG_ECM_RECEPTOR_INTERACTION               |
| 6:112561430  | FYN          | KEGG_ECM_RECEPTOR_INTERACTION               |
| 10:15562608  | ITGA8        | KEGG_ECM_RECEPTOR_INTERACTION               |
| 10:15569598  | ITGA8        | KEGG_ECM_RECEPTOR_INTERACTION               |
| 10:15652368  | ITGA8        | KEGG_ECM_RECEPTOR_INTERACTION               |
| 17:42454243  | FAM171A2     | KEGG_ECM_RECEPTOR_INTERACTION               |

|              |          |                                                                 |
|--------------|----------|-----------------------------------------------------------------|
| 1:171837985  | VAMP4    | KEGG_ENDOCYTOSIS                                                |
| 1:171945488  | VAMP4    | KEGG_ENDOCYTOSIS                                                |
| 1:172137119  | VAMP4    | KEGG_ENDOCYTOSIS                                                |
| 1:172386261  | VAMP4    | KEGG_ENDOCYTOSIS                                                |
| 6:29798642   | TRIM40   | KEGG_ENDOCYTOSIS                                                |
| 6:71510024   | RIMS1    | KEGG_ENDOCYTOSIS                                                |
| 6:71539732   | RIMS1    | KEGG_ENDOCYTOSIS                                                |
| 8:17125768   | FGF20    | KEGG_ENDOCYTOSIS                                                |
| 8:131145058  | FAM49B   | KEGG_ENDOCYTOSIS                                                |
| 8:131153067  | FAM49B   | KEGG_ENDOCYTOSIS                                                |
| 8:131245821  | FAM49B   | KEGG_ENDOCYTOSIS                                                |
| 8:131328260  | FAM49B   | KEGG_ENDOCYTOSIS                                                |
| 8:131404984  | FAM49B   | KEGG_ENDOCYTOSIS                                                |
| 8:131408202  | FAM49B   | KEGG_ENDOCYTOSIS                                                |
| 8:131455469  | FAM49B   | KEGG_ENDOCYTOSIS                                                |
| 9:17579690   | SH3GL2_2 | KEGG_ENDOCYTOSIS                                                |
| 9:17587160   | SH3GL2_2 | KEGG_ENDOCYTOSIS                                                |
| 9:17609302   | SH3GL2_2 | KEGG_ENDOCYTOSIS                                                |
| 9:17626762   | SH3GL2_2 | KEGG_ENDOCYTOSIS                                                |
| 9:17627444   | SH3GL2_2 | KEGG_ENDOCYTOSIS                                                |
| 9:17642664   | SH3GL2_2 | KEGG_ENDOCYTOSIS                                                |
| 9:17710876   | SH3GL2_2 | KEGG_ENDOCYTOSIS                                                |
| 9:17732590   | SH3GL2_2 | KEGG_ENDOCYTOSIS                                                |
| 9:17737514   | SH3GL2_2 | KEGG_ENDOCYTOSIS                                                |
| 9:17758945   | SH3GL2_2 | KEGG_ENDOCYTOSIS                                                |
| 10:121054578 | INPP5F   | KEGG_ENDOCYTOSIS                                                |
| 10:121077191 | INPP5F   | KEGG_ENDOCYTOSIS                                                |
| 10:121085648 | INPP5F   | KEGG_ENDOCYTOSIS                                                |
| 10:121104943 | INPP5F   | KEGG_ENDOCYTOSIS                                                |
| 10:121114292 | INPP5F   | KEGG_ENDOCYTOSIS                                                |
| 10:121191186 | INPP5F   | KEGG_ENDOCYTOSIS                                                |
| 10:121201427 | INPP5F   | KEGG_ENDOCYTOSIS                                                |
| 17:7578671   | V1NB1    | KEGG_ENDOMETRIAL_CANCER                                         |
| 11:133947732 | IGSF9B   | KEGG_EPITHELIAL_CELL_SIGNALING_IN_HELICOBACTER_PYLORI_INFECTION |
| 12:124219791 | HIP1R    | KEGG_EPITHELIAL_CELL_SIGNALING_IN_HELICOBACTER_PYLORI_INFECTION |
| 17:43390763  | CRHR1_2  | KEGG_EPITHELIAL_CELL_SIGNALING_IN_HELICOBACTER_PYLORI_INFECTION |
| 4:114424939  | CAMK2D   | KEGG_ERBB_SIGNALING_PATHWAY                                     |
| 4:114494052  | CAMK2D   | KEGG_ERBB_SIGNALING_PATHWAY                                     |
| 4:114529492  | CAMK2D   | KEGG_ERBB_SIGNALING_PATHWAY                                     |
| 4:114539964  | CAMK2D   | KEGG_ERBB_SIGNALING_PATHWAY                                     |
| 4:114597918  | CAMK2D   | KEGG_ERBB_SIGNALING_PATHWAY                                     |
| 17:40392358  | RETREG3  | KEGG_ERBB_SIGNALING_PATHWAY                                     |
| 6:112137847  | FYN      | KEGG_FC_EPSILON_RI_SIGNALING_PATHWAY                            |
| 6:112151452  | FYN      | KEGG_FC_EPSILON_RI_SIGNALING_PATHWAY                            |
| 6:112175069  | FYN      | KEGG_FC_EPSILON_RI_SIGNALING_PATHWAY                            |
| 1:171837985  | VAMP4    | KEGG_FC_GAMMA_R_MEDIATED_PHAGOCYTOSIS                           |
| 1:171945488  | VAMP4    | KEGG_FC_GAMMA_R_MEDIATED_PHAGOCYTOSIS                           |
| 1:172137119  | VAMP4    | KEGG_FC_GAMMA_R_MEDIATED_PHAGOCYTOSIS                           |
| 1:172386261  | VAMP4    | KEGG_FC_GAMMA_R_MEDIATED_PHAGOCYTOSIS                           |
| 8:131145058  | FAM49B   | KEGG_FC_GAMMA_R_MEDIATED_PHAGOCYTOSIS                           |
| 8:131153067  | FAM49B   | KEGG_FC_GAMMA_R_MEDIATED_PHAGOCYTOSIS                           |
| 8:131245821  | FAM49B   | KEGG_FC_GAMMA_R_MEDIATED_PHAGOCYTOSIS                           |
| 8:131328260  | FAM49B   | KEGG_FC_GAMMA_R_MEDIATED_PHAGOCYTOSIS                           |

|             |                 |                                       |
|-------------|-----------------|---------------------------------------|
| 8:131404984 | <i>FAM49B</i>   | KEGG_FC_GAMMA_R_MEDIATED_PHAGOCYTOSIS |
| 8:131408202 | <i>FAM49B</i>   | KEGG_FC_GAMMA_R_MEDIATED_PHAGOCYTOSIS |
| 8:131455469 | <i>FAM49B</i>   | KEGG_FC_GAMMA_R_MEDIATED_PHAGOCYTOSIS |
| 3:49162284  | <i>IP6K2</i>    | KEGG_FOCAL_ADHESION                   |
| 3:49162583  | <i>IP6K2</i>    | KEGG_FOCAL_ADHESION                   |
| 3:49406095  | <i>IP6K2</i>    | KEGG_FOCAL_ADHESION                   |
| 3:49424231  | <i>IP6K2</i>    | KEGG_FOCAL_ADHESION                   |
| 3:49450137  | <i>IP6K2</i>    | KEGG_FOCAL_ADHESION                   |
| 6:32031904  | <i>HLA-DRB5</i> | KEGG_FOCAL_ADHESION                   |
| 6:32062687  | <i>HLA-DRB5</i> | KEGG_FOCAL_ADHESION                   |
| 6:33153528  | <i>HLA-DRB5</i> | KEGG_FOCAL_ADHESION                   |
| 6:112137847 | <i>FYN</i>      | KEGG_FOCAL_ADHESION                   |
| 6:112151452 | <i>FYN</i>      | KEGG_FOCAL_ADHESION                   |
| 6:112175069 | <i>FYN</i>      | KEGG_FOCAL_ADHESION                   |
| 6:112494762 | <i>FYN</i>      | KEGG_FOCAL_ADHESION                   |
| 6:112531401 | <i>FYN</i>      | KEGG_FOCAL_ADHESION                   |
| 6:112561154 | <i>FYN</i>      | KEGG_FOCAL_ADHESION                   |
| 6:112561430 | <i>FYN</i>      | KEGG_FOCAL_ADHESION                   |
| 10:15562608 | <i>ITGA8</i>    | KEGG_FOCAL_ADHESION                   |
| 10:15569598 | <i>ITGA8</i>    | KEGG_FOCAL_ADHESION                   |
| 10:15652368 | <i>ITGA8</i>    | KEGG_FOCAL_ADHESION                   |
| 15:62744042 | <i>VPS13C</i>   | KEGG_FOCAL_ADHESION                   |
| 15:62748823 | <i>VPS13C</i>   | KEGG_FOCAL_ADHESION                   |
| 15:62755248 | <i>VPS13C</i>   | KEGG_FOCAL_ADHESION                   |
| 15:62758352 | <i>VPS13C</i>   | KEGG_FOCAL_ADHESION                   |
| 15:62865256 | <i>VPS13C</i>   | KEGG_FOCAL_ADHESION                   |
| 15:62875398 | <i>VPS13C</i>   | KEGG_FOCAL_ADHESION                   |
| 15:62875464 | <i>VPS13C</i>   | KEGG_FOCAL_ADHESION                   |
| 15:62915346 | <i>VPS13C</i>   | KEGG_FOCAL_ADHESION                   |
| 15:62968927 | <i>VPS13C</i>   | KEGG_FOCAL_ADHESION                   |
| 17:42454243 | <i>FAM171A2</i> | KEGG_FOCAL_ADHESION                   |
| 4:17465704  | <i>LCORL</i>    | KEGG_FOLATE_BIOSYNTHESIS              |
| 4:17503839  | <i>LCORL</i>    | KEGG_FOLATE_BIOSYNTHESIS              |
| 14:55348869 | <i>GCH1</i>     | KEGG_FOLATE_BIOSYNTHESIS              |
| 8:17161374  | <i>FGF20</i>    | KEGG_FRUCTOSE_AND_MANNOSSE_METABOLISM |
| 8:17176046  | <i>FGF20</i>    | KEGG_FRUCTOSE_AND_MANNOSSE_METABOLISM |
| 8:17243260  | <i>FGF20</i>    | KEGG_FRUCTOSE_AND_MANNOSSE_METABOLISM |
| 8:17260937  | <i>FGF20</i>    | KEGG_FRUCTOSE_AND_MANNOSSE_METABOLISM |
| 17:41056283 | <i>RETREG3</i>  | KEGG_GALACTOSE_METABOLISM             |
| 3:123089448 | <i>KPNA1</i>    | KEGG_GAP_JUNCTION                     |
| 8:131799767 | <i>FAM49B</i>   | KEGG_GAP_JUNCTION                     |
| 8:131845512 | <i>FAM49B</i>   | KEGG_GAP_JUNCTION                     |
| 8:131865425 | <i>FAM49B</i>   | KEGG_GAP_JUNCTION                     |
| 8:131901170 | <i>FAM49B</i>   | KEGG_GAP_JUNCTION                     |
| 16:50300511 | <i>CASC16</i>   | KEGG_GAP_JUNCTION                     |
| 16:50317039 | <i>CASC16</i>   | KEGG_GAP_JUNCTION                     |
| 4:114424939 | <i>CAMK2D</i>   | KEGG_GLIOMA                           |
| 4:114494052 | <i>CAMK2D</i>   | KEGG_GLIOMA                           |
| 4:114529492 | <i>CAMK2D</i>   | KEGG_GLIOMA                           |
| 4:114539964 | <i>CAMK2D</i>   | KEGG_GLIOMA                           |
| 4:114597918 | <i>CAMK2D</i>   | KEGG_GLIOMA                           |
| 17:7578671  | <i>V1NB1</i>    | KEGG_GLIOMA                           |
| 4:17606956  | <i>LCORL</i>    | KEGG_GLUTATHIONE_METABOLISM           |

|              |                     |                                                              |
|--------------|---------------------|--------------------------------------------------------------|
| 16:29871730  | <i>CD19</i>         | KEGG_GLYCEROPHOSPHOLIPID_METABOLISM                          |
| 20:6011934   | <i>CRLS1</i>        | KEGG_GLYCEROPHOSPHOLIPID_METABOLISM                          |
| 17:41056283  | <i>RETREG3</i>      | KEGG_GLYCOLYSIS_GLUONEOGENESIS                               |
| 6:71594785   | <i>RIMS1</i>        | KEGG_GLYCOSAMINOGLYCAN_BIOSYNTHESIS_CHONDROITIN_SULFATE      |
| 11:134255325 | <i>IGSF9B</i>       | KEGG_GLYCOSAMINOGLYCAN_BIOSYNTHESIS_CHONDROITIN_SULFATE      |
| 6:71594785   | <i>RIMS1</i>        | KEGG_GLYCOSAMINOGLYCAN_BIOSYNTHESIS_HEPARAN_SULFATE          |
| 11:134255325 | <i>IGSF9B</i>       | KEGG_GLYCOSAMINOGLYCAN_BIOSYNTHESIS_HEPARAN_SULFATE          |
| 13:97182312  | <i>MBNL2</i>        | KEGG_GLYCOSAMINOGLYCAN_BIOSYNTHESIS_HEPARAN_SULFATE          |
| 13:97200682  | <i>MBNL2</i>        | KEGG_GLYCOSAMINOGLYCAN_BIOSYNTHESIS_HEPARAN_SULFATE          |
| 13:97278310  | <i>MBNL2</i>        | KEGG_GLYCOSAMINOGLYCAN_BIOSYNTHESIS_HEPARAN_SULFATE          |
| 13:97441830  | <i>MBNL2</i>        | KEGG_GLYCOSAMINOGLYCAN_BIOSYNTHESIS_HEPARAN_SULFATE          |
| 7:65425894   | <i>GS1-124K5.11</i> | KEGG_GLYCOSAMINOGLYCAN_DEGRADATION                           |
| 3:160817877  | <i>SPTSSB</i>       | KEGG_GLYCOPHINGOLIPID_BIOSYNTHESIS_GLOBO_SERIES              |
| 2:168682052  | <i>STK39</i>        | KEGG_GLYCOPHINGOLIPID_BIOSYNTHESIS_LACTO_AND_NEOLACTO_SERIES |
| 3:182976382  | <i>MCCC1</i>        | KEGG_GLYCOPHINGOLIPID_BIOSYNTHESIS_LACTO_AND_NEOLACTO_SERIES |
| 3:182979912  | <i>MCCC1</i>        | KEGG_GLYCOPHINGOLIPID_BIOSYNTHESIS_LACTO_AND_NEOLACTO_SERIES |
| 3:183005320  | <i>MCCC1</i>        | KEGG_GLYCOPHINGOLIPID_BIOSYNTHESIS_LACTO_AND_NEOLACTO_SERIES |
| 1:172386261  | <i>VAMP4</i>        | KEGG_GLYCOSYLPHOSPHATIDYLINOSITOL_GPI_ANCHOR_BIOSYNTHESIS    |
| 1:172388441  | <i>VAMP4</i>        | KEGG_GLYCOSYLPHOSPHATIDYLINOSITOL_GPI_ANCHOR_BIOSYNTHESIS    |
| 1:172389198  | <i>VAMP4</i>        | KEGG_GLYCOSYLPHOSPHATIDYLINOSITOL_GPI_ANCHOR_BIOSYNTHESIS    |
| 3:123089448  | <i>KPNA1</i>        | KEGG_GNRH_SIGNALING_PATHWAY                                  |
| 4:114424939  | <i>CAMK2D</i>       | KEGG_GNRH_SIGNALING_PATHWAY                                  |
| 4:114494052  | <i>CAMK2D</i>       | KEGG_GNRH_SIGNALING_PATHWAY                                  |
| 4:114529492  | <i>CAMK2D</i>       | KEGG_GNRH_SIGNALING_PATHWAY                                  |
| 4:114539964  | <i>CAMK2D</i>       | KEGG_GNRH_SIGNALING_PATHWAY                                  |
| 4:114597918  | <i>CAMK2D</i>       | KEGG_GNRH_SIGNALING_PATHWAY                                  |
| 8:131799767  | <i>FAM49B</i>       | KEGG_GNRH_SIGNALING_PATHWAY                                  |
| 8:131845512  | <i>FAM49B</i>       | KEGG_GNRH_SIGNALING_PATHWAY                                  |
| 8:131865425  | <i>FAM49B</i>       | KEGG_GNRH_SIGNALING_PATHWAY                                  |
| 8:131901170  | <i>FAM49B</i>       | KEGG_GNRH_SIGNALING_PATHWAY                                  |
| 16:50300511  | <i>CASC16</i>       | KEGG_GNRH_SIGNALING_PATHWAY                                  |
| 16:50317039  | <i>CASC16</i>       | KEGG_GNRH_SIGNALING_PATHWAY                                  |
| 6:29798642   | <i>TRIM40</i>       | KEGG_GRAFT_VERSUS_HOST_DISEASE                               |
| 6:32602372   | <i>HLA-DRB5</i>     | KEGG_GRAFT_VERSUS_HOST_DISEASE                               |
| 6:32930679   | <i>HLA-DRB5</i>     | KEGG_GRAFT_VERSUS_HOST_DISEASE                               |
| 6:32934409   | <i>HLA-DRB5</i>     | KEGG_GRAFT_VERSUS_HOST_DISEASE                               |
| 6:32973303   | <i>HLA-DRB5</i>     | KEGG_GRAFT_VERSUS_HOST_DISEASE                               |
| 6:32974268   | <i>HLA-DRB5</i>     | KEGG_GRAFT_VERSUS_HOST_DISEASE                               |
| 2:170012307  | <i>STK39</i>        | KEGG_HEDGEHOG_SIGNALING_PATHWAY                              |
| 2:170028024  | <i>STK39</i>        | KEGG_HEDGEHOG_SIGNALING_PATHWAY                              |
| 2:170066424  | <i>STK39</i>        | KEGG_HEDGEHOG_SIGNALING_PATHWAY                              |
| 10:103185542 | <i>GBF1</i>         | KEGG_HEDGEHOG_SIGNALING_PATHWAY                              |
| 10:103305087 | <i>GBF1</i>         | KEGG_HEDGEHOG_SIGNALING_PATHWAY                              |
| 10:103308244 | <i>GBF1</i>         | KEGG_HEDGEHOG_SIGNALING_PATHWAY                              |
| 10:104278055 | <i>GBF1</i>         | KEGG_HEDGEHOG_SIGNALING_PATHWAY                              |
| 10:104305501 | <i>GBF1</i>         | KEGG_HEDGEHOG_SIGNALING_PATHWAY                              |
| 17:44843651  | <i>WNT3</i>         | KEGG_HEDGEHOG_SIGNALING_PATHWAY                              |
| 17:44870978  | <i>WNT3</i>         | KEGG_HEDGEHOG_SIGNALING_PATHWAY                              |
| 17:44871422  | <i>WNT3</i>         | KEGG_HEDGEHOG_SIGNALING_PATHWAY                              |
| 17:44888209  | <i>WNT3</i>         | KEGG_HEDGEHOG_SIGNALING_PATHWAY                              |
| 17:44888715  | <i>WNT3</i>         | KEGG_HEDGEHOG_SIGNALING_PATHWAY                              |
| 17:44906949  | <i>WNT3</i>         | KEGG_HEDGEHOG_SIGNALING_PATHWAY                              |
| 17:44912901  | <i>WNT3</i>         | KEGG_HEDGEHOG_SIGNALING_PATHWAY                              |

|              |                 |                                                   |
|--------------|-----------------|---------------------------------------------------|
| 17:44931399  | <i>WNT3</i>     | KEGG_HEDGEHOG_SIGNALING_PATHWAY                   |
| 17:44947756  | <i>WNT3</i>     | KEGG_HEDGEHOG_SIGNALING_PATHWAY                   |
| 2:102612026  | <i>MAP4K4</i>   | KEGG_HEMATOPOIETIC_CELL_LINEAGE                   |
| 2:102621855  | <i>MAP4K4</i>   | KEGG_HEMATOPOIETIC_CELL_LINEAGE                   |
| 2:102631503  | <i>MAP4K4</i>   | KEGG_HEMATOPOIETIC_CELL_LINEAGE                   |
| 2:102633387  | <i>MAP4K4</i>   | KEGG_HEMATOPOIETIC_CELL_LINEAGE                   |
| 2:102720323  | <i>MAP4K4</i>   | KEGG_HEMATOPOIETIC_CELL_LINEAGE                   |
| 2:102783052  | <i>MAP4K4</i>   | KEGG_HEMATOPOIETIC_CELL_LINEAGE                   |
| 4:15789288   | <i>BST1</i>     | KEGG_HEMATOPOIETIC_CELL_LINEAGE                   |
| 4:15816670   | <i>BST1</i>     | KEGG_HEMATOPOIETIC_CELL_LINEAGE                   |
| 4:15829612   | <i>BST1</i>     | KEGG_HEMATOPOIETIC_CELL_LINEAGE                   |
| 17:42454243  | <i>FAM171A2</i> | KEGG_HEMATOPOIETIC_CELL_LINEAGE                   |
| 1:161171736  | <i>FCGR2A</i>   | KEGG_HUNTINGTONS_DISEASE                          |
| 14:55902186  | <i>GCH1</i>     | KEGG_HUNTINGTONS_DISEASE                          |
| 17:7101771   | <i>V1NB1</i>    | KEGG_HUNTINGTONS_DISEASE                          |
| 17:7578671   | <i>V1NB1</i>    | KEGG_HUNTINGTONS_DISEASE                          |
| 17:7631694   | <i>V1NB1</i>    | KEGG_HUNTINGTONS_DISEASE                          |
| 17:7682605   | <i>V1NB1</i>    | KEGG_HUNTINGTONS_DISEASE                          |
| 17:39883520  | <i>RETREG3</i>  | KEGG_HUNTINGTONS_DISEASE                          |
| 1:156059276  | <i>GBAP1</i>    | KEGG_HYPERTROPHIC_CARDIOMYOPATHY_HCM              |
| 3:49561208   | <i>IP6K2</i>    | KEGG_HYPERTROPHIC_CARDIOMYOPATHY_HCM              |
| 10:15562608  | <i>ITGA8</i>    | KEGG_HYPERTROPHIC_CARDIOMYOPATHY_HCM              |
| 10:15569598  | <i>ITGA8</i>    | KEGG_HYPERTROPHIC_CARDIOMYOPATHY_HCM              |
| 10:15652368  | <i>ITGA8</i>    | KEGG_HYPERTROPHIC_CARDIOMYOPATHY_HCM              |
| 17:42454243  | <i>FAM171A2</i> | KEGG_HYPERTROPHIC_CARDIOMYOPATHY_HCM              |
| 1:226907849  | <i>ITPKB</i>    | KEGG_INOSITOL_PHOSPHATE_METABOLISM                |
| 1:226910340  | <i>ITPKB</i>    | KEGG_INOSITOL_PHOSPHATE_METABOLISM                |
| 1:226916078  | <i>ITPKB</i>    | KEGG_INOSITOL_PHOSPHATE_METABOLISM                |
| 16:29871730  | <i>CD19</i>     | KEGG_INOSITOL_PHOSPHATE_METABOLISM                |
| 17:43195981  | <i>CRHR1_2</i>  | KEGG_INOSITOL_PHOSPHATE_METABOLISM                |
| 3:48835245   | <i>IP6K2</i>    | KEGG_INSULIN_SIGNALING_PATHWAY                    |
| 14:55515304  | <i>GCH1</i>     | KEGG_INSULIN_SIGNALING_PATHWAY                    |
| 17:41056283  | <i>RETREG3</i>  | KEGG_INSULIN_SIGNALING_PATHWAY                    |
| 6:32602372   | <i>HLA-DRB5</i> | KEGG_INTESTINAL_IMMUNE_NETWORK_FOR_IGA_PRODUCTION |
| 6:32930679   | <i>HLA-DRB5</i> | KEGG_INTESTINAL_IMMUNE_NETWORK_FOR_IGA_PRODUCTION |
| 6:32934409   | <i>HLA-DRB5</i> | KEGG_INTESTINAL_IMMUNE_NETWORK_FOR_IGA_PRODUCTION |
| 6:32973303   | <i>HLA-DRB5</i> | KEGG_INTESTINAL_IMMUNE_NETWORK_FOR_IGA_PRODUCTION |
| 6:32974268   | <i>HLA-DRB5</i> | KEGG_INTESTINAL_IMMUNE_NETWORK_FOR_IGA_PRODUCTION |
| 17:43390763  | <i>CRHR1_2</i>  | KEGG_INTESTINAL_IMMUNE_NETWORK_FOR_IGA_PRODUCTION |
| 14:55515304  | <i>GCH1</i>     | KEGG_JAK_STAT_SIGNALING_PATHWAY                   |
| 17:40392358  | <i>RETREG3</i>  | KEGG_JAK_STAT_SIGNALING_PATHWAY                   |
| 6:32602372   | <i>HLA-DRB5</i> | KEGG_LEISHMANIA_INFECTION                         |
| 6:32930679   | <i>HLA-DRB5</i> | KEGG_LEISHMANIA_INFECTION                         |
| 6:32934409   | <i>HLA-DRB5</i> | KEGG_LEISHMANIA_INFECTION                         |
| 6:32973303   | <i>HLA-DRB5</i> | KEGG_LEISHMANIA_INFECTION                         |
| 6:32974268   | <i>HLA-DRB5</i> | KEGG_LEISHMANIA_INFECTION                         |
| 3:49406095   | <i>IP6K2</i>    | KEGG_LEUKOCYTE_TRANSENDOTHELIAL_MIGRATION         |
| 3:49424231   | <i>IP6K2</i>    | KEGG_LEUKOCYTE_TRANSENDOTHELIAL_MIGRATION         |
| 3:49450137   | <i>IP6K2</i>    | KEGG_LEUKOCYTE_TRANSENDOTHELIAL_MIGRATION         |
| 11:133947732 | <i>IGSF9B</i>   | KEGG_LEUKOCYTE_TRANSENDOTHELIAL_MIGRATION         |
| 16:30510571  | <i>SETD1A</i>   | KEGG_LEUKOCYTE_TRANSENDOTHELIAL_MIGRATION         |
| 16:30516492  | <i>SETD1A</i>   | KEGG_LEUKOCYTE_TRANSENDOTHELIAL_MIGRATION         |
| 16:30520856  | <i>SETD1A</i>   | KEGG_LEUKOCYTE_TRANSENDOTHELIAL_MIGRATION         |

|              |                     |                                           |
|--------------|---------------------|-------------------------------------------|
| 21:37854286  | <i>DYRK1A</i>       | KEGG_LEUKOCYTE_TRANSENDOTHELIAL_MIGRATION |
| 21:37859449  | <i>DYRK1A</i>       | KEGG_LEUKOCYTE_TRANSENDOTHELIAL_MIGRATION |
| 21:37860785  | <i>DYRK1A</i>       | KEGG_LEUKOCYTE_TRANSENDOTHELIAL_MIGRATION |
| 21:37894089  | <i>DYRK1A</i>       | KEGG_LEUKOCYTE_TRANSENDOTHELIAL_MIGRATION |
| 21:37899076  | <i>DYRK1A</i>       | KEGG_LEUKOCYTE_TRANSENDOTHELIAL_MIGRATION |
| 5:133558885  | <i>C5orf24</i>      | KEGG_LONG_TERM_DEPRESSION                 |
| 17:43744203  | <i>CRHR1_2</i>      | KEGG_LONG_TERM_DEPRESSION                 |
| 17:43748712  | <i>CRHR1_2</i>      | KEGG_LONG_TERM_DEPRESSION                 |
| 17:43784228  | <i>CRHR1_2</i>      | KEGG_LONG_TERM_DEPRESSION                 |
| 17:43791502  | <i>CRHR1_2</i>      | KEGG_LONG_TERM_DEPRESSION                 |
| 17:43796210  | <i>CRHR1_2</i>      | KEGG_LONG_TERM_DEPRESSION                 |
| 17:43843861  | <i>CRHR1_2</i>      | KEGG_LONG_TERM_DEPRESSION                 |
| 17:43847503  | <i>CRHR1_2</i>      | KEGG_LONG_TERM_DEPRESSION                 |
| 17:43849514  | <i>CRHR1_2</i>      | KEGG_LONG_TERM_DEPRESSION                 |
| 4:114424939  | <i>CAMK2D</i>       | KEGG_LONG_TERM_POTENTIATION               |
| 4:114494052  | <i>CAMK2D</i>       | KEGG_LONG_TERM_POTENTIATION               |
| 4:114529492  | <i>CAMK2D</i>       | KEGG_LONG_TERM_POTENTIATION               |
| 4:114539964  | <i>CAMK2D</i>       | KEGG_LONG_TERM_POTENTIATION               |
| 4:114597918  | <i>CAMK2D</i>       | KEGG_LONG_TERM_POTENTIATION               |
| 8:131799767  | <i>FAM49B</i>       | KEGG_LONG_TERM_POTENTIATION               |
| 8:131845512  | <i>FAM49B</i>       | KEGG_LONG_TERM_POTENTIATION               |
| 8:131865425  | <i>FAM49B</i>       | KEGG_LONG_TERM_POTENTIATION               |
| 8:131901170  | <i>FAM49B</i>       | KEGG_LONG_TERM_POTENTIATION               |
| 1:155359992  | <i>GBAP1</i>        | KEGG_LYSINE_DEGRADATION                   |
| 6:31862876   | <i>HLA-DRB5</i>     | KEGG_LYSINE_DEGRADATION                   |
| 19:2172266   | <i>SPPL2B</i>       | KEGG_LYSINE_DEGRADATION                   |
| 19:2202252   | <i>SPPL2B</i>       | KEGG_LYSINE_DEGRADATION                   |
| 1:155205634  | <i>GBAP1</i>        | KEGG_LYSOSOME                             |
| 3:182872860  | <i>MCCC1</i>        | KEGG_LYSOSOME                             |
| 4:77104152   | <i>FAM47E-STBD1</i> | KEGG_LYSOSOME                             |
| 4:77124196   | <i>FAM47E-STBD1</i> | KEGG_LYSOSOME                             |
| 4:77134786   | <i>FAM47E-STBD1</i> | KEGG_LYSOSOME                             |
| 6:32126002   | <i>HLA-DRB5</i>     | KEGG_LYSOSOME                             |
| 7:65425894   | <i>GS1-124K5.11</i> | KEGG_LYSOSOME                             |
| 8:11712443   | <i>CTSB</i>         | KEGG_LYSOSOME                             |
| 12:123453034 | <i>HIP1R</i>        | KEGG_LYSOSOME                             |
| 12:124219791 | <i>HIP1R</i>        | KEGG_LYSOSOME                             |
| 14:88372366  | <i>GALC</i>         | KEGG_LYSOSOME                             |
| 14:88393900  | <i>GALC</i>         | KEGG_LYSOSOME                             |
| 14:88415750  | <i>GALC</i>         | KEGG_LYSOSOME                             |
| 14:88443553  | <i>GALC</i>         | KEGG_LYSOSOME                             |
| 19:2114694   | <i>SPPL2B</i>       | KEGG_LYSOSOME                             |
| 19:2122458   | <i>SPPL2B</i>       | KEGG_LYSOSOME                             |
| 2:102357447  | <i>MAP4K4</i>       | KEGG_MAPK_SIGNALING_PATHWAY               |
| 2:102379173  | <i>MAP4K4</i>       | KEGG_MAPK_SIGNALING_PATHWAY               |
| 2:102413116  | <i>MAP4K4</i>       | KEGG_MAPK_SIGNALING_PATHWAY               |
| 2:102612026  | <i>MAP4K4</i>       | KEGG_MAPK_SIGNALING_PATHWAY               |
| 2:102621855  | <i>MAP4K4</i>       | KEGG_MAPK_SIGNALING_PATHWAY               |
| 2:102631503  | <i>MAP4K4</i>       | KEGG_MAPK_SIGNALING_PATHWAY               |
| 2:102633387  | <i>MAP4K4</i>       | KEGG_MAPK_SIGNALING_PATHWAY               |
| 2:102720323  | <i>MAP4K4</i>       | KEGG_MAPK_SIGNALING_PATHWAY               |
| 2:102783052  | <i>MAP4K4</i>       | KEGG_MAPK_SIGNALING_PATHWAY               |
| 6:33287183   | <i>HLA-DRB5</i>     | KEGG_MAPK_SIGNALING_PATHWAY               |

|             |                 |                                                |
|-------------|-----------------|------------------------------------------------|
| 17:7578671  | <i>V1NB1</i>    | KEGG_MAPK_SIGNALING_PATHWAY                    |
| 17:41845031 | <i>FAM171A2</i> | KEGG_MAPK_SIGNALING_PATHWAY                    |
| 17:43390763 | <i>CRHR1_2</i>  | KEGG_MAPK_SIGNALING_PATHWAY                    |
| 17:43999203 | <i>WNT3</i>     | KEGG_MAPK_SIGNALING_PATHWAY                    |
| 17:44005297 | <i>WNT3</i>     | KEGG_MAPK_SIGNALING_PATHWAY                    |
| 17:44019712 | <i>WNT3</i>     | KEGG_MAPK_SIGNALING_PATHWAY                    |
| 17:44060492 | <i>WNT3</i>     | KEGG_MAPK_SIGNALING_PATHWAY                    |
| 17:44065263 | <i>WNT3</i>     | KEGG_MAPK_SIGNALING_PATHWAY                    |
| 17:44081178 | <i>WNT3</i>     | KEGG_MAPK_SIGNALING_PATHWAY                    |
| 17:44083297 | <i>WNT3</i>     | KEGG_MAPK_SIGNALING_PATHWAY                    |
| 19:2477820  | <i>SPPL2B</i>   | KEGG_MAPK_SIGNALING_PATHWAY                    |
| 3:123089448 | <i>KPNA1</i>    | KEGG_MELANOGENESIS                             |
| 4:114424939 | <i>CAMK2D</i>   | KEGG_MELANOGENESIS                             |
| 4:114494052 | <i>CAMK2D</i>   | KEGG_MELANOGENESIS                             |
| 4:114529492 | <i>CAMK2D</i>   | KEGG_MELANOGENESIS                             |
| 4:114539964 | <i>CAMK2D</i>   | KEGG_MELANOGENESIS                             |
| 4:114597918 | <i>CAMK2D</i>   | KEGG_MELANOGENESIS                             |
| 8:131799767 | <i>FAM49B</i>   | KEGG_MELANOGENESIS                             |
| 8:131845512 | <i>FAM49B</i>   | KEGG_MELANOGENESIS                             |
| 8:131865425 | <i>FAM49B</i>   | KEGG_MELANOGENESIS                             |
| 8:131901170 | <i>FAM49B</i>   | KEGG_MELANOGENESIS                             |
| 16:50300511 | <i>CASC16</i>   | KEGG_MELANOGENESIS                             |
| 16:50317039 | <i>CASC16</i>   | KEGG_MELANOGENESIS                             |
| 17:7129974  | <i>V1NB1</i>    | KEGG_MELANOGENESIS                             |
| 17:44843651 | <i>WNT3</i>     | KEGG_MELANOGENESIS                             |
| 17:44870978 | <i>WNT3</i>     | KEGG_MELANOGENESIS                             |
| 17:44871422 | <i>WNT3</i>     | KEGG_MELANOGENESIS                             |
| 17:44888209 | <i>WNT3</i>     | KEGG_MELANOGENESIS                             |
| 17:44888715 | <i>WNT3</i>     | KEGG_MELANOGENESIS                             |
| 17:44906949 | <i>WNT3</i>     | KEGG_MELANOGENESIS                             |
| 17:44912901 | <i>WNT3</i>     | KEGG_MELANOGENESIS                             |
| 17:44931399 | <i>WNT3</i>     | KEGG_MELANOGENESIS                             |
| 17:44947756 | <i>WNT3</i>     | KEGG_MELANOGENESIS                             |
| 17:7578671  | <i>V1NB1</i>    | KEGG_MELANOMA                                  |
| 14:75495059 | <i>RPS6KL1</i>  | KEGG_MISMATCH_REPAIR                           |
| 13:49890086 | <i>CAB39L</i>   | KEGG_MTOR_SIGNALING_PATHWAY                    |
| 13:49897815 | <i>CAB39L</i>   | KEGG_MTOR_SIGNALING_PATHWAY                    |
| 13:49914395 | <i>CAB39L</i>   | KEGG_MTOR_SIGNALING_PATHWAY                    |
| 13:49927732 | <i>CAB39L</i>   | KEGG_MTOR_SIGNALING_PATHWAY                    |
| 13:49944031 | <i>CAB39L</i>   | KEGG_MTOR_SIGNALING_PATHWAY                    |
| 13:49960054 | <i>CAB39L</i>   | KEGG_MTOR_SIGNALING_PATHWAY                    |
| 13:49976904 | <i>CAB39L</i>   | KEGG_MTOR_SIGNALING_PATHWAY                    |
| 13:50013818 | <i>CAB39L</i>   | KEGG_MTOR_SIGNALING_PATHWAY                    |
| 6:29798642  | <i>TRIM40</i>   | KEGG_NATURAL_KILLER_CELL_MEDIATED_CYTOTOXICITY |
| 6:112137847 | <i>FYN</i>      | KEGG_NATURAL_KILLER_CELL_MEDIATED_CYTOTOXICITY |
| 6:112151452 | <i>FYN</i>      | KEGG_NATURAL_KILLER_CELL_MEDIATED_CYTOTOXICITY |
| 6:112175069 | <i>FYN</i>      | KEGG_NATURAL_KILLER_CELL_MEDIATED_CYTOTOXICITY |
| 8:22974278  | <i>BIN3</i>     | KEGG_NATURAL_KILLER_CELL_MEDIATED_CYTOTOXICITY |
| 8:23050400  | <i>BIN3</i>     | KEGG_NATURAL_KILLER_CELL_MEDIATED_CYTOTOXICITY |
| 16:30510571 | <i>SETD1A</i>   | KEGG_NATURAL_KILLER_CELL_MEDIATED_CYTOTOXICITY |
| 16:30516492 | <i>SETD1A</i>   | KEGG_NATURAL_KILLER_CELL_MEDIATED_CYTOTOXICITY |
| 16:30520856 | <i>SETD1A</i>   | KEGG_NATURAL_KILLER_CELL_MEDIATED_CYTOTOXICITY |
| 3:150935203 | <i>MED12L</i>   | KEGG_NEUROACTIVE_LIGAND_RECEPTOR_INTERACTION   |

|              |                 |                                              |
|--------------|-----------------|----------------------------------------------|
| 6:29565889   | <i>TRIM40</i>   | KEGG_NEUROACTIVE_LIGAND_RECEPTOR_INTERACTION |
| 6:29590715   | <i>TRIM40</i>   | KEGG_NEUROACTIVE_LIGAND_RECEPTOR_INTERACTION |
| 9:33791164   | <i>UBAP2</i>    | KEGG_NEUROACTIVE_LIGAND_RECEPTOR_INTERACTION |
| 17:7352976   | <i>V1NB1</i>    | KEGG_NEUROACTIVE_LIGAND_RECEPTOR_INTERACTION |
| 17:43744203  | <i>CRHR1_2</i>  | KEGG_NEUROACTIVE_LIGAND_RECEPTOR_INTERACTION |
| 17:43748712  | <i>CRHR1_2</i>  | KEGG_NEUROACTIVE_LIGAND_RECEPTOR_INTERACTION |
| 17:43784228  | <i>CRHR1_2</i>  | KEGG_NEUROACTIVE_LIGAND_RECEPTOR_INTERACTION |
| 17:43791502  | <i>CRHR1_2</i>  | KEGG_NEUROACTIVE_LIGAND_RECEPTOR_INTERACTION |
| 17:43796210  | <i>CRHR1_2</i>  | KEGG_NEUROACTIVE_LIGAND_RECEPTOR_INTERACTION |
| 17:43843861  | <i>CRHR1_2</i>  | KEGG_NEUROACTIVE_LIGAND_RECEPTOR_INTERACTION |
| 17:43847503  | <i>CRHR1_2</i>  | KEGG_NEUROACTIVE_LIGAND_RECEPTOR_INTERACTION |
| 17:43849514  | <i>CRHR1_2</i>  | KEGG_NEUROACTIVE_LIGAND_RECEPTOR_INTERACTION |
| 3:49406095   | <i>IP6K2</i>    | KEGG_NEUROTROPHIN_SIGNALING_PATHWAY          |
| 3:49424231   | <i>IP6K2</i>    | KEGG_NEUROTROPHIN_SIGNALING_PATHWAY          |
| 3:49450137   | <i>IP6K2</i>    | KEGG_NEUROTROPHIN_SIGNALING_PATHWAY          |
| 4:114424939  | <i>CAMK2D</i>   | KEGG_NEUROTROPHIN_SIGNALING_PATHWAY          |
| 4:114494052  | <i>CAMK2D</i>   | KEGG_NEUROTROPHIN_SIGNALING_PATHWAY          |
| 4:114529492  | <i>CAMK2D</i>   | KEGG_NEUROTROPHIN_SIGNALING_PATHWAY          |
| 4:114539964  | <i>CAMK2D</i>   | KEGG_NEUROTROPHIN_SIGNALING_PATHWAY          |
| 4:114597918  | <i>CAMK2D</i>   | KEGG_NEUROTROPHIN_SIGNALING_PATHWAY          |
| 17:7578671   | <i>V1NB1</i>    | KEGG_NEUROTROPHIN_SIGNALING_PATHWAY          |
| 2:134902070  | <i>TMEM163</i>  | KEGG_N_GLYCAN_BIOSYNTHESIS                   |
| 2:134932210  | <i>TMEM163</i>  | KEGG_N_GLYCAN_BIOSYNTHESIS                   |
| 2:134956835  | <i>TMEM163</i>  | KEGG_N_GLYCAN_BIOSYNTHESIS                   |
| 2:134986578  | <i>TMEM163</i>  | KEGG_N_GLYCAN_BIOSYNTHESIS                   |
| 2:134993021  | <i>TMEM163</i>  | KEGG_N_GLYCAN_BIOSYNTHESIS                   |
| 2:135035038  | <i>TMEM163</i>  | KEGG_N_GLYCAN_BIOSYNTHESIS                   |
| 2:135040234  | <i>TMEM163</i>  | KEGG_N_GLYCAN_BIOSYNTHESIS                   |
| 2:135165078  | <i>TMEM163</i>  | KEGG_N_GLYCAN_BIOSYNTHESIS                   |
| 2:135166385  | <i>TMEM163</i>  | KEGG_N_GLYCAN_BIOSYNTHESIS                   |
| 4:15709252   | <i>BST1</i>     | KEGG_NICOTINATE_AND_NICOTINAMIDE_METABOLISM  |
| 4:15713608   | <i>BST1</i>     | KEGG_NICOTINATE_AND_NICOTINAMIDE_METABOLISM  |
| 4:15724372   | <i>BST1</i>     | KEGG_NICOTINATE_AND_NICOTINAMIDE_METABOLISM  |
| 4:15737882   | <i>BST1</i>     | KEGG_NICOTINATE_AND_NICOTINAMIDE_METABOLISM  |
| 4:15789288   | <i>BST1</i>     | KEGG_NICOTINATE_AND_NICOTINAMIDE_METABOLISM  |
| 4:15816670   | <i>BST1</i>     | KEGG_NICOTINATE_AND_NICOTINAMIDE_METABOLISM  |
| 4:15829612   | <i>BST1</i>     | KEGG_NICOTINATE_AND_NICOTINAMIDE_METABOLISM  |
| 5:102889674  | <i>PAM</i>      | KEGG_NICOTINATE_AND_NICOTINAMIDE_METABOLISM  |
| 10:104847713 | <i>GBF1</i>     | KEGG_NICOTINATE_AND_NICOTINAMIDE_METABOLISM  |
| 10:104861736 | <i>GBF1</i>     | KEGG_NICOTINATE_AND_NICOTINAMIDE_METABOLISM  |
| 10:104926485 | <i>GBF1</i>     | KEGG_NICOTINATE_AND_NICOTINAMIDE_METABOLISM  |
| 10:104929716 | <i>GBF1</i>     | KEGG_NICOTINATE_AND_NICOTINAMIDE_METABOLISM  |
| 16:50730088  | <i>CASC16</i>   | KEGG_NOD_LIKE_RECEPTOR_SIGNALING_PATHWAY     |
| 16:50730446  | <i>CASC16</i>   | KEGG_NOD_LIKE_RECEPTOR_SIGNALING_PATHWAY     |
| 16:50745926  | <i>CASC16</i>   | KEGG_NOD_LIKE_RECEPTOR_SIGNALING_PATHWAY     |
| 17:7578671   | <i>V1NB1</i>    | KEGG_NON_SMALL_CELL_LUNG_CANCER              |
| 1:227067656  | <i>ITPKB</i>    | KEGG_NOTCH_SIGNALING_PATHWAY                 |
| 3:122289921  | <i>KPNA1</i>    | KEGG_NOTCH_SIGNALING_PATHWAY                 |
| 6:32179319   | <i>HLA-DRB5</i> | KEGG_NOTCH_SIGNALING_PATHWAY                 |
| 6:32186193   | <i>HLA-DRB5</i> | KEGG_NOTCH_SIGNALING_PATHWAY                 |
| 17:7129974   | <i>V1NB1</i>    | KEGG_NOTCH_SIGNALING_PATHWAY                 |
| 12:133206648 | <i>FBRSL1</i>   | KEGG_NUCLEOTIDE_EXCISION_REPAIR              |
| 12:133223685 | <i>FBRSL1</i>   | KEGG_NUCLEOTIDE_EXCISION_REPAIR              |

|              |                     |                                        |
|--------------|---------------------|----------------------------------------|
| 11:11299050  | <i>RNF141</i>       | KEGG_O_GLYCAN_BIOSYNTHESIS             |
| 11:11316049  | <i>RNF141</i>       | KEGG_O_GLYCAN_BIOSYNTHESIS             |
| 11:11364660  | <i>RNF141</i>       | KEGG_O_GLYCAN_BIOSYNTHESIS             |
| 11:11399582  | <i>RNF141</i>       | KEGG_O_GLYCAN_BIOSYNTHESIS             |
| 11:11412180  | <i>RNF141</i>       | KEGG_O_GLYCAN_BIOSYNTHESIS             |
| 11:11494181  | <i>RNF141</i>       | KEGG_O_GLYCAN_BIOSYNTHESIS             |
| 11:11504200  | <i>RNF141</i>       | KEGG_O_GLYCAN_BIOSYNTHESIS             |
| 11:11508780  | <i>RNF141</i>       | KEGG_O_GLYCAN_BIOSYNTHESIS             |
| 11:11519365  | <i>RNF141</i>       | KEGG_O_GLYCAN_BIOSYNTHESIS             |
| 12:132687184 | <i>FBRSL1</i>       | KEGG_O_GLYCAN_BIOSYNTHESIS             |
| 4:114424939  | <i>CAMK2D</i>       | KEGG_OLFACTORY_TRANSDUCTION            |
| 4:114494052  | <i>CAMK2D</i>       | KEGG_OLFACTORY_TRANSDUCTION            |
| 4:114529492  | <i>CAMK2D</i>       | KEGG_OLFACTORY_TRANSDUCTION            |
| 4:114539964  | <i>CAMK2D</i>       | KEGG_OLFACTORY_TRANSDUCTION            |
| 4:114597918  | <i>CAMK2D</i>       | KEGG_OLFACTORY_TRANSDUCTION            |
| 6:29373213   | <i>TRIM40</i>       | KEGG_OLFACTORY_TRANSDUCTION            |
| 6:29407378   | <i>TRIM40</i>       | KEGG_OLFACTORY_TRANSDUCTION            |
| 6:29412222   | <i>TRIM40</i>       | KEGG_OLFACTORY_TRANSDUCTION            |
| 3:123089448  | <i>KPNA1</i>        | KEGG_OOCYTE_MEIOSIS                    |
| 4:114424939  | <i>CAMK2D</i>       | KEGG_OOCYTE_MEIOSIS                    |
| 4:114494052  | <i>CAMK2D</i>       | KEGG_OOCYTE_MEIOSIS                    |
| 4:114529492  | <i>CAMK2D</i>       | KEGG_OOCYTE_MEIOSIS                    |
| 4:114539964  | <i>CAMK2D</i>       | KEGG_OOCYTE_MEIOSIS                    |
| 4:114597918  | <i>CAMK2D</i>       | KEGG_OOCYTE_MEIOSIS                    |
| 5:133558885  | <i>C5orf24</i>      | KEGG_OOCYTE_MEIOSIS                    |
| 8:131799767  | <i>FAM49B</i>       | KEGG_OOCYTE_MEIOSIS                    |
| 8:131845512  | <i>FAM49B</i>       | KEGG_OOCYTE_MEIOSIS                    |
| 8:131865425  | <i>FAM49B</i>       | KEGG_OOCYTE_MEIOSIS                    |
| 8:131901170  | <i>FAM49B</i>       | KEGG_OOCYTE_MEIOSIS                    |
| 10:103185542 | <i>GBF1</i>         | KEGG_OOCYTE_MEIOSIS                    |
| 10:103305087 | <i>GBF1</i>         | KEGG_OOCYTE_MEIOSIS                    |
| 10:103308244 | <i>GBF1</i>         | KEGG_OOCYTE_MEIOSIS                    |
| 16:50300511  | <i>CASC16</i>       | KEGG_OOCYTE_MEIOSIS                    |
| 16:50317039  | <i>CASC16</i>       | KEGG_OOCYTE_MEIOSIS                    |
| 17:45215865  | <i>WNT3</i>         | KEGG_OOCYTE_MEIOSIS                    |
| 17:45244822  | <i>WNT3</i>         | KEGG_OOCYTE_MEIOSIS                    |
| 1:155205634  | <i>GBAP1</i>        | KEGG_OTHER_GLYCAN_DEGRADATION          |
| 1:161171736  | <i>FCGR2A</i>       | KEGG_OXIDATIVE_PHOSPHORYLATION         |
| 12:124219791 | <i>HIP1R</i>        | KEGG_OXIDATIVE_PHOSPHORYLATION         |
| 4:76407998   | <i>FAM47E-STBD1</i> | KEGG_P53_SIGNALING_PATHWAY             |
| 4:78136299   | <i>FAM47E-STBD1</i> | KEGG_P53_SIGNALING_PATHWAY             |
| 4:78175384   | <i>FAM47E-STBD1</i> | KEGG_P53_SIGNALING_PATHWAY             |
| 17:7578671   | <i>V1NB1</i>        | KEGG_P53_SIGNALING_PATHWAY             |
| 19:2477820   | <i>SPPL2B</i>       | KEGG_P53_SIGNALING_PATHWAY             |
| 17:7578671   | <i>V1NB1</i>        | KEGG_PANCREATIC_CANCER                 |
| 6:133025715  | <i>RPS12</i>        | KEGG_PANTOTHENATE_AND_COA_BIOSYNTHESIS |
| 6:133028870  | <i>RPS12</i>        | KEGG_PANTOTHENATE_AND_COA_BIOSYNTHESIS |
| 6:133075265  | <i>RPS12</i>        | KEGG_PANTOTHENATE_AND_COA_BIOSYNTHESIS |
| 1:161171736  | <i>FCGR2A</i>       | KEGG_PARKINSONS_DISEASE                |
| 4:90677243   | <i>SNCA_2</i>       | KEGG_PARKINSONS_DISEASE                |
| 4:90700329   | <i>SNCA_2</i>       | KEGG_PARKINSONS_DISEASE                |
| 4:90703993   | <i>SNCA_2</i>       | KEGG_PARKINSONS_DISEASE                |
| 4:90738839   | <i>SNCA_2</i>       | KEGG_PARKINSONS_DISEASE                |

|              |                     |                                               |
|--------------|---------------------|-----------------------------------------------|
| 4:90757294   | <i>SNCA_2</i>       | KEGG_PARKINSONS_DISEASE                       |
| 12:40614434  | <i>LRRK2_2</i>      | KEGG_PARKINSONS_DISEASE                       |
| 12:40614656  | <i>LRRK2_2</i>      | KEGG_PARKINSONS_DISEASE                       |
| 12:40617231  | <i>LRRK2_2</i>      | KEGG_PARKINSONS_DISEASE                       |
| 12:40653993  | <i>LRRK2_2</i>      | KEGG_PARKINSONS_DISEASE                       |
| 12:40698422  | <i>LRRK2_2</i>      | KEGG_PARKINSONS_DISEASE                       |
| 12:40707861  | <i>LRRK2_2</i>      | KEGG_PARKINSONS_DISEASE                       |
| 12:40734202  | <i>LRRK2_2</i>      | KEGG_PARKINSONS_DISEASE                       |
| 12:40753796  | <i>LRRK2_2</i>      | KEGG_PARKINSONS_DISEASE                       |
| 1:155975202  | <i>GBAP1</i>        | KEGG_PATHOGENIC_ESCHERICHIA_COLI_INFECTION    |
| 3:49406095   | <i>IP6K2</i>        | KEGG_PATHOGENIC_ESCHERICHIA_COLI_INFECTION    |
| 3:49424231   | <i>IP6K2</i>        | KEGG_PATHOGENIC_ESCHERICHIA_COLI_INFECTION    |
| 3:49450137   | <i>IP6K2</i>        | KEGG_PATHOGENIC_ESCHERICHIA_COLI_INFECTION    |
| 6:112137847  | <i>FYN</i>          | KEGG_PATHOGENIC_ESCHERICHIA_COLI_INFECTION    |
| 6:112151452  | <i>FYN</i>          | KEGG_PATHOGENIC_ESCHERICHIA_COLI_INFECTION    |
| 6:112175069  | <i>FYN</i>          | KEGG_PATHOGENIC_ESCHERICHIA_COLI_INFECTION    |
| 3:49162284   | <i>IP6K2</i>        | KEGG_PATHWAYS_IN_CANCER                       |
| 3:49162583   | <i>IP6K2</i>        | KEGG_PATHWAYS_IN_CANCER                       |
| 3:49406095   | <i>IP6K2</i>        | KEGG_PATHWAYS_IN_CANCER                       |
| 3:49424231   | <i>IP6K2</i>        | KEGG_PATHWAYS_IN_CANCER                       |
| 3:49450137   | <i>IP6K2</i>        | KEGG_PATHWAYS_IN_CANCER                       |
| 6:112494762  | <i>FYN</i>          | KEGG_PATHWAYS_IN_CANCER                       |
| 6:112531401  | <i>FYN</i>          | KEGG_PATHWAYS_IN_CANCER                       |
| 6:112561154  | <i>FYN</i>          | KEGG_PATHWAYS_IN_CANCER                       |
| 6:112561430  | <i>FYN</i>          | KEGG_PATHWAYS_IN_CANCER                       |
| 10:104278055 | <i>GBF1</i>         | KEGG_PATHWAYS_IN_CANCER                       |
| 10:104305501 | <i>GBF1</i>         | KEGG_PATHWAYS_IN_CANCER                       |
| 17:7129974   | <i>V1NB1</i>        | KEGG_PATHWAYS_IN_CANCER                       |
| 17:7578671   | <i>V1NB1</i>        | KEGG_PATHWAYS_IN_CANCER                       |
| 17:39883520  | <i>RETREG3</i>      | KEGG_PATHWAYS_IN_CANCER                       |
| 17:40392358  | <i>RETREG3</i>      | KEGG_PATHWAYS_IN_CANCER                       |
| 17:42454243  | <i>FAM171A2</i>     | KEGG_PATHWAYS_IN_CANCER                       |
| 17:44843651  | <i>WNT3</i>         | KEGG_PATHWAYS_IN_CANCER                       |
| 17:44870978  | <i>WNT3</i>         | KEGG_PATHWAYS_IN_CANCER                       |
| 17:44871422  | <i>WNT3</i>         | KEGG_PATHWAYS_IN_CANCER                       |
| 17:44888209  | <i>WNT3</i>         | KEGG_PATHWAYS_IN_CANCER                       |
| 17:44888715  | <i>WNT3</i>         | KEGG_PATHWAYS_IN_CANCER                       |
| 17:44906949  | <i>WNT3</i>         | KEGG_PATHWAYS_IN_CANCER                       |
| 17:44912901  | <i>WNT3</i>         | KEGG_PATHWAYS_IN_CANCER                       |
| 17:44931399  | <i>WNT3</i>         | KEGG_PATHWAYS_IN_CANCER                       |
| 17:44947756  | <i>WNT3</i>         | KEGG_PATHWAYS_IN_CANCER                       |
| 7:65425894   | <i>GS1-124K5.11</i> | KEGG_PENTOSE_AND_GLUCURONATE_INTERCONVERSIONS |
| 5:102889674  | <i>PAM</i>          | KEGG_PEROXISOME                               |
| 12:39960237  | <i>LRRK2_2</i>      | KEGG_PEROXISOME                               |
| 12:133295501 | <i>FBRSL1</i>       | KEGG_PEROXISOME                               |
| 14:74764925  | <i>RPS6KL1</i>      | KEGG_PEROXISOME                               |
| 1:226907849  | <i>ITPKB</i>        | KEGG_PHOSPHATIDYLINOSITOL_SIGNALING_SYSTEM    |
| 1:226910340  | <i>ITPKB</i>        | KEGG_PHOSPHATIDYLINOSITOL_SIGNALING_SYSTEM    |
| 1:226916078  | <i>ITPKB</i>        | KEGG_PHOSPHATIDYLINOSITOL_SIGNALING_SYSTEM    |
| 16:29871730  | <i>CD19</i>         | KEGG_PHOSPHATIDYLINOSITOL_SIGNALING_SYSTEM    |
| 17:43195981  | <i>CRHR1_2</i>      | KEGG_PHOSPHATIDYLINOSITOL_SIGNALING_SYSTEM    |
| 7:65425894   | <i>GS1-124K5.11</i> | KEGG_PORPHYRIN_AND_CHLOROPHYLL_METABOLISM     |
| 16:30999462  | <i>SETD1A</i>       | KEGG_PRIMARY_BILE_ACID_BIOSYNTHESIS           |

|              |                 |                                              |
|--------------|-----------------|----------------------------------------------|
| 6:32789400   | <i>HLA-DRB5</i> | KEGG_PRIMARY_IMMUNODEFICIENCY                |
| 6:32791831   | <i>HLA-DRB5</i> | KEGG_PRIMARY_IMMUNODEFICIENCY                |
| 6:32797361   | <i>HLA-DRB5</i> | KEGG_PRIMARY_IMMUNODEFICIENCY                |
| 6:32802462   | <i>HLA-DRB5</i> | KEGG_PRIMARY_IMMUNODEFICIENCY                |
| 6:112137847  | <i>FYN</i>      | KEGG_PRION_DISEASES                          |
| 6:112151452  | <i>FYN</i>      | KEGG_PRION_DISEASES                          |
| 6:112175069  | <i>FYN</i>      | KEGG_PRION_DISEASES                          |
| 3:48199695   | <i>IP6K2</i>    | KEGG_PROGESTERONE_MEDIATED_OOCYTE_MATURATION |
| 3:48214438   | <i>IP6K2</i>    | KEGG_PROGESTERONE_MEDIATED_OOCYTE_MATURATION |
| 3:123089448  | <i>KPNA1</i>    | KEGG_PROGESTERONE_MEDIATED_OOCYTE_MATURATION |
| 8:131799767  | <i>FAM49B</i>   | KEGG_PROGESTERONE_MEDIATED_OOCYTE_MATURATION |
| 8:131845512  | <i>FAM49B</i>   | KEGG_PROGESTERONE_MEDIATED_OOCYTE_MATURATION |
| 8:131865425  | <i>FAM49B</i>   | KEGG_PROGESTERONE_MEDIATED_OOCYTE_MATURATION |
| 8:131901170  | <i>FAM49B</i>   | KEGG_PROGESTERONE_MEDIATED_OOCYTE_MATURATION |
| 16:50300511  | <i>CASC16</i>   | KEGG_PROGESTERONE_MEDIATED_OOCYTE_MATURATION |
| 16:50317039  | <i>CASC16</i>   | KEGG_PROGESTERONE_MEDIATED_OOCYTE_MATURATION |
| 17:45215865  | <i>WNT3</i>     | KEGG_PROGESTERONE_MEDIATED_OOCYTE_MATURATION |
| 17:45244822  | <i>WNT3</i>     | KEGG_PROGESTERONE_MEDIATED_OOCYTE_MATURATION |
| 17:7578671   | <i>V1NB1</i>    | KEGG_PROSTATE_CANCER                         |
| 17:7560294   | <i>V1NB1</i>    | KEGG_PROXIMAL_TUBULE_BICARBONATE_RECLAMATION |
| 3:123089448  | <i>KPNA1</i>    | KEGG_PURINE_METABOLISM                       |
| 5:59236972   | <i>ELOVL7</i>   | KEGG_PURINE_METABOLISM                       |
| 5:59490965   | <i>ELOVL7</i>   | KEGG_PURINE_METABOLISM                       |
| 5:59554719   | <i>ELOVL7</i>   | KEGG_PURINE_METABOLISM                       |
| 5:59705316   | <i>ELOVL7</i>   | KEGG_PURINE_METABOLISM                       |
| 5:59736085   | <i>ELOVL7</i>   | KEGG_PURINE_METABOLISM                       |
| 5:59812853   | <i>ELOVL7</i>   | KEGG_PURINE_METABOLISM                       |
| 8:22108784   | <i>BIN3</i>     | KEGG_PURINE_METABOLISM                       |
| 8:131799767  | <i>FAM49B</i>   | KEGG_PURINE_METABOLISM                       |
| 8:131845512  | <i>FAM49B</i>   | KEGG_PURINE_METABOLISM                       |
| 8:131865425  | <i>FAM49B</i>   | KEGG_PURINE_METABOLISM                       |
| 8:131901170  | <i>FAM49B</i>   | KEGG_PURINE_METABOLISM                       |
| 9:34342881   | <i>UBAP2</i>    | KEGG_PURINE_METABOLISM                       |
| 10:104847713 | <i>GBF1</i>     | KEGG_PURINE_METABOLISM                       |
| 10:104861736 | <i>GBF1</i>     | KEGG_PURINE_METABOLISM                       |
| 10:104926485 | <i>GBF1</i>     | KEGG_PURINE_METABOLISM                       |
| 10:104929716 | <i>GBF1</i>     | KEGG_PURINE_METABOLISM                       |
| 11:10392432  | <i>RNF141</i>   | KEGG_PURINE_METABOLISM                       |
| 11:10429998  | <i>RNF141</i>   | KEGG_PURINE_METABOLISM                       |
| 11:10458098  | <i>RNF141</i>   | KEGG_PURINE_METABOLISM                       |
| 11:10471738  | <i>RNF141</i>   | KEGG_PURINE_METABOLISM                       |
| 11:10487997  | <i>RNF141</i>   | KEGG_PURINE_METABOLISM                       |
| 11:10494132  | <i>RNF141</i>   | KEGG_PURINE_METABOLISM                       |
| 12:133206648 | <i>FBRSL1</i>   | KEGG_PURINE_METABOLISM                       |
| 12:133223685 | <i>FBRSL1</i>   | KEGG_PURINE_METABOLISM                       |
| 14:74477206  | <i>RPS6KL1</i>  | KEGG_PURINE_METABOLISM                       |
| 16:50300511  | <i>CASC16</i>   | KEGG_PURINE_METABOLISM                       |
| 16:50317039  | <i>CASC16</i>   | KEGG_PURINE_METABOLISM                       |
| 8:22108784   | <i>BIN3</i>     | KEGG_PYRIMIDINE_METABOLISM                   |
| 9:34342881   | <i>UBAP2</i>    | KEGG_PYRIMIDINE_METABOLISM                   |
| 10:104847713 | <i>GBF1</i>     | KEGG_PYRIMIDINE_METABOLISM                   |
| 10:104861736 | <i>GBF1</i>     | KEGG_PYRIMIDINE_METABOLISM                   |
| 10:104926485 | <i>GBF1</i>     | KEGG_PYRIMIDINE_METABOLISM                   |

|              |                     |                                                |
|--------------|---------------------|------------------------------------------------|
| 10:104929716 | <i>GBF1</i>         | KEGG_PYRIMIDINE_METABOLISM                     |
| 12:133206648 | <i>FBRSL1</i>       | KEGG_PYRIMIDINE_METABOLISM                     |
| 12:133223685 | <i>FBRSL1</i>       | KEGG_PYRIMIDINE_METABOLISM                     |
| 14:74477206  | <i>RPS6KL1</i>      | KEGG_PYRIMIDINE_METABOLISM                     |
| 17:76177567  | <i>DNAH17</i>       | KEGG_PYRIMIDINE_METABOLISM                     |
| 3:49406095   | <i>IP6K2</i>        | KEGG_REGULATION_OF_ACTIN_CYTOSKELETON          |
| 3:49424231   | <i>IP6K2</i>        | KEGG_REGULATION_OF_ACTIN_CYTOSKELETON          |
| 3:49450137   | <i>IP6K2</i>        | KEGG_REGULATION_OF_ACTIN_CYTOSKELETON          |
| 10:15562608  | <i>ITGA8</i>        | KEGG_REGULATION_OF_ACTIN_CYTOSKELETON          |
| 10:15569598  | <i>ITGA8</i>        | KEGG_REGULATION_OF_ACTIN_CYTOSKELETON          |
| 10:15652368  | <i>ITGA8</i>        | KEGG_REGULATION_OF_ACTIN_CYTOSKELETON          |
| 16:30510571  | <i>SETD1A</i>       | KEGG_REGULATION_OF_ACTIN_CYTOSKELETON          |
| 16:30516492  | <i>SETD1A</i>       | KEGG_REGULATION_OF_ACTIN_CYTOSKELETON          |
| 16:30520856  | <i>SETD1A</i>       | KEGG_REGULATION_OF_ACTIN_CYTOSKELETON          |
| 16:31370452  | <i>SETD1A</i>       | KEGG_REGULATION_OF_ACTIN_CYTOSKELETON          |
| 17:42454243  | <i>FAM171A2</i>     | KEGG_REGULATION_OF_ACTIN_CYTOSKELETON          |
| 8:17161374   | <i>FGF20</i>        | KEGG_RIBOFLAVIN_METABOLISM                     |
| 8:17176046   | <i>FGF20</i>        | KEGG_RIBOFLAVIN_METABOLISM                     |
| 8:17243260   | <i>FGF20</i>        | KEGG_RIBOFLAVIN_METABOLISM                     |
| 8:17260937   | <i>FGF20</i>        | KEGG_RIBOFLAVIN_METABOLISM                     |
| 16:50790891  | <i>CASC16</i>       | KEGG_RIG_I_LIKE_RECEPTOR_SIGNALING_PATHWAY     |
| 8:22108784   | <i>BIN3</i>         | KEGG_RNA_POLYMERASE                            |
| 3:49162284   | <i>IP6K2</i>        | KEGG_SMALL_CELL_LUNG_CANCER                    |
| 3:49162583   | <i>IP6K2</i>        | KEGG_SMALL_CELL_LUNG_CANCER                    |
| 6:112494762  | <i>FYN</i>          | KEGG_SMALL_CELL_LUNG_CANCER                    |
| 6:112531401  | <i>FYN</i>          | KEGG_SMALL_CELL_LUNG_CANCER                    |
| 6:112561154  | <i>FYN</i>          | KEGG_SMALL_CELL_LUNG_CANCER                    |
| 6:112561430  | <i>FYN</i>          | KEGG_SMALL_CELL_LUNG_CANCER                    |
| 17:7578671   | <i>V1NB1</i>        | KEGG_SMALL_CELL_LUNG_CANCER                    |
| 17:42454243  | <i>FAM171A2</i>     | KEGG_SMALL_CELL_LUNG_CANCER                    |
| 1:171689486  | <i>VAMP4</i>        | KEGG_SNARE_INTERACTIONS_IN_VESICULAR_TRANSPORT |
| 6:132785797  | <i>RPS12</i>        | KEGG_SNARE_INTERACTIONS_IN_VESICULAR_TRANSPORT |
| 6:132830746  | <i>RPS12</i>        | KEGG_SNARE_INTERACTIONS_IN_VESICULAR_TRANSPORT |
| 16:31004169  | <i>SETD1A</i>       | KEGG_SNARE_INTERACTIONS_IN_VESICULAR_TRANSPORT |
| 17:45020426  | <i>WNT3</i>         | KEGG_SNARE_INTERACTIONS_IN_VESICULAR_TRANSPORT |
| 17:45059032  | <i>WNT3</i>         | KEGG_SNARE_INTERACTIONS_IN_VESICULAR_TRANSPORT |
| 17:45089680  | <i>WNT3</i>         | KEGG_SNARE_INTERACTIONS_IN_VESICULAR_TRANSPORT |
| 1:155205634  | <i>GBAP1</i>        | KEGG_SPHINGOLIPID_METABOLISM                   |
| 14:88372366  | <i>GALC</i>         | KEGG_SPHINGOLIPID_METABOLISM                   |
| 14:88393900  | <i>GALC</i>         | KEGG_SPHINGOLIPID_METABOLISM                   |
| 14:88415750  | <i>GALC</i>         | KEGG_SPHINGOLIPID_METABOLISM                   |
| 14:88443553  | <i>GALC</i>         | KEGG_SPHINGOLIPID_METABOLISM                   |
| 5:134132269  | <i>C5orf24</i>      | KEGG_SPLICEOSOME                               |
| 6:30628082   | <i>TRIM40</i>       | KEGG_SPLICEOSOME                               |
| 6:30631063   | <i>TRIM40</i>       | KEGG_SPLICEOSOME                               |
| 6:30639369   | <i>TRIM40</i>       | KEGG_SPLICEOSOME                               |
| 17:41575811  | <i>FAM171A2</i>     | KEGG_SPLICEOSOME                               |
| 17:42929985  | <i>CRHR1_2</i>      | KEGG_SPLICEOSOME                               |
| 7:65425894   | <i>GS1-124K5.11</i> | KEGG_STARCH_AND_SUCROSE_METABOLISM             |
| 17:41056283  | <i>RETREG3</i>      | KEGG_STARCH_AND_SUCROSE_METABOLISM             |
| 8:11679472   | <i>CTSB</i>         | KEGG_STEROID_BIOSYNTHESIS                      |
| 10:104591639 | <i>GBF1</i>         | KEGG_STEROID_HORMONE_BIOSYNTHESIS              |
| 5:134722833  | <i>C5orf24</i>      | KEGG_SYSTEMIC_LUPUS_ERYTHEMATOSUS              |

|              |                     |                                                 |
|--------------|---------------------|-------------------------------------------------|
| 6:31895092   | <i>HLA-DRB5</i>     | KEGG_SYSTEMIC_LUPUS_ERYTHEMATOSUS               |
| 6:31897219   | <i>HLA-DRB5</i>     | KEGG_SYSTEMIC_LUPUS_ERYTHEMATOSUS               |
| 6:32602372   | <i>HLA-DRB5</i>     | KEGG_SYSTEMIC_LUPUS_ERYTHEMATOSUS               |
| 6:32930679   | <i>HLA-DRB5</i>     | KEGG_SYSTEMIC_LUPUS_ERYTHEMATOSUS               |
| 6:32934409   | <i>HLA-DRB5</i>     | KEGG_SYSTEMIC_LUPUS_ERYTHEMATOSUS               |
| 6:32973303   | <i>HLA-DRB5</i>     | KEGG_SYSTEMIC_LUPUS_ERYTHEMATOSUS               |
| 6:32974268   | <i>HLA-DRB5</i>     | KEGG_SYSTEMIC_LUPUS_ERYTHEMATOSUS               |
| 8:131799767  | <i>FAM49B</i>       | KEGG_TASTE_TRANSDUCTION                         |
| 8:131845512  | <i>FAM49B</i>       | KEGG_TASTE_TRANSDUCTION                         |
| 8:131865425  | <i>FAM49B</i>       | KEGG_TASTE_TRANSDUCTION                         |
| 8:131901170  | <i>FAM49B</i>       | KEGG_TASTE_TRANSDUCTION                         |
| 3:49406095   | <i>IP6K2</i>        | KEGG_T_CELL_RECEPTOR_SIGNALING_PATHWAY          |
| 3:49424231   | <i>IP6K2</i>        | KEGG_T_CELL_RECEPTOR_SIGNALING_PATHWAY          |
| 3:49450137   | <i>IP6K2</i>        | KEGG_T_CELL_RECEPTOR_SIGNALING_PATHWAY          |
| 6:112137847  | <i>FYN</i>          | KEGG_T_CELL_RECEPTOR_SIGNALING_PATHWAY          |
| 6:112151452  | <i>FYN</i>          | KEGG_T_CELL_RECEPTOR_SIGNALING_PATHWAY          |
| 6:112175069  | <i>FYN</i>          | KEGG_T_CELL_RECEPTOR_SIGNALING_PATHWAY          |
| 17:43390763  | <i>CRHR1_2</i>      | KEGG_T_CELL_RECEPTOR_SIGNALING_PATHWAY          |
| 1:226074321  | <i>ITPKB</i>        | KEGG_TGF_BETA_SIGNALING_PATHWAY                 |
| 3:49406095   | <i>IP6K2</i>        | KEGG_TGF_BETA_SIGNALING_PATHWAY                 |
| 3:49424231   | <i>IP6K2</i>        | KEGG_TGF_BETA_SIGNALING_PATHWAY                 |
| 3:49450137   | <i>IP6K2</i>        | KEGG_TGF_BETA_SIGNALING_PATHWAY                 |
| 5:133558885  | <i>C5orf24</i>      | KEGG_TGF_BETA_SIGNALING_PATHWAY                 |
| 19:2251817   | <i>SPPL2B</i>       | KEGG_TGF_BETA_SIGNALING_PATHWAY                 |
| 17:7578671   | <i>V1NB1</i>        | KEGG_THYROID_CANCER                             |
| 1:155359992  | <i>GBAP1</i>        | KEGG_TIGHT_JUNCTION                             |
| 3:49406095   | <i>IP6K2</i>        | KEGG_TIGHT_JUNCTION                             |
| 3:49424231   | <i>IP6K2</i>        | KEGG_TIGHT_JUNCTION                             |
| 3:49450137   | <i>IP6K2</i>        | KEGG_TIGHT_JUNCTION                             |
| 5:133558885  | <i>C5orf24</i>      | KEGG_TIGHT_JUNCTION                             |
| 11:133947732 | <i>IGSF9B</i>       | KEGG_TIGHT_JUNCTION                             |
| 21:37854286  | <i>DYRK1A</i>       | KEGG_TIGHT_JUNCTION                             |
| 21:37859449  | <i>DYRK1A</i>       | KEGG_TIGHT_JUNCTION                             |
| 21:37860785  | <i>DYRK1A</i>       | KEGG_TIGHT_JUNCTION                             |
| 21:37894089  | <i>DYRK1A</i>       | KEGG_TIGHT_JUNCTION                             |
| 21:37899076  | <i>DYRK1A</i>       | KEGG_TIGHT_JUNCTION                             |
| 4:76924571   | <i>FAM47E-STBD1</i> | KEGG_TOLL_LIKE_RECEPTOR_SIGNALING_PATHWAY       |
| 6:29798642   | <i>TRIM40</i>       | KEGG_TYPE_I_DIABETES_MELLITUS                   |
| 6:32602372   | <i>HLA-DRB5</i>     | KEGG_TYPE_I_DIABETES_MELLITUS                   |
| 6:32930679   | <i>HLA-DRB5</i>     | KEGG_TYPE_I_DIABETES_MELLITUS                   |
| 6:32934409   | <i>HLA-DRB5</i>     | KEGG_TYPE_I_DIABETES_MELLITUS                   |
| 6:32973303   | <i>HLA-DRB5</i>     | KEGG_TYPE_I_DIABETES_MELLITUS                   |
| 6:32974268   | <i>HLA-DRB5</i>     | KEGG_TYPE_I_DIABETES_MELLITUS                   |
| 14:55515304  | <i>GCH1</i>         | KEGG_TYPE_II_DIABETES_MELLITUS                  |
| 4:76407998   | <i>FAM47E-STBD1</i> | KEGG_UBIQUITIN_MEDIATED_PROTEOLYSIS             |
| 5:133710339  | <i>C5orf24</i>      | KEGG_UBIQUITIN_MEDIATED_PROTEOLYSIS             |
| 9:33845203   | <i>UBAP2</i>        | KEGG_UBIQUITIN_MEDIATED_PROTEOLYSIS             |
| 10:103185542 | <i>GBF1</i>         | KEGG_UBIQUITIN_MEDIATED_PROTEOLYSIS             |
| 10:103305087 | <i>GBF1</i>         | KEGG_UBIQUITIN_MEDIATED_PROTEOLYSIS             |
| 10:103308244 | <i>GBF1</i>         | KEGG_UBIQUITIN_MEDIATED_PROTEOLYSIS             |
| 17:45215865  | <i>WNT3</i>         | KEGG_UBIQUITIN_MEDIATED_PROTEOLYSIS             |
| 17:45244822  | <i>WNT3</i>         | KEGG_UBIQUITIN_MEDIATED_PROTEOLYSIS             |
| 6:31758240   | <i>HLA-DRB5</i>     | KEGG_VALINE_LEUCINE_AND_ISOLEUCINE_BIOSYNTHESIS |

|              |                 |                                                 |
|--------------|-----------------|-------------------------------------------------|
| 6:31762311   | <i>HLA-DRB5</i> | KEGG_VALINE_LEUCINE_AND_Isoleucine_Biosynthesis |
| 3:182760073  | <i>MCCC1</i>    | KEGG_VALINE_LEUCINE_AND_Isoleucine_Degradation  |
| 11:134130174 | <i>IGSF9B</i>   | KEGG_VALINE_LEUCINE_AND_Isoleucine_Degradation  |
| 3:49406095   | <i>IP6K2</i>    | KEGG_VASCULAR_SMOOTH_MUSCLE_CONTRACTION         |
| 3:49424231   | <i>IP6K2</i>    | KEGG_VASCULAR_SMOOTH_MUSCLE_CONTRACTION         |
| 3:49450137   | <i>IP6K2</i>    | KEGG_VASCULAR_SMOOTH_MUSCLE_CONTRACTION         |
| 3:123089448  | <i>KPNA1</i>    | KEGG_VASCULAR_SMOOTH_MUSCLE_CONTRACTION         |
| 8:131799767  | <i>FAM49B</i>   | KEGG_VASCULAR_SMOOTH_MUSCLE_CONTRACTION         |
| 8:131845512  | <i>FAM49B</i>   | KEGG_VASCULAR_SMOOTH_MUSCLE_CONTRACTION         |
| 8:131865425  | <i>FAM49B</i>   | KEGG_VASCULAR_SMOOTH_MUSCLE_CONTRACTION         |
| 8:131901170  | <i>FAM49B</i>   | KEGG_VASCULAR_SMOOTH_MUSCLE_CONTRACTION         |
| 11:10647977  | <i>RNF141</i>   | KEGG_VASCULAR_SMOOTH_MUSCLE_CONTRACTION         |
| 11:10648481  | <i>RNF141</i>   | KEGG_VASCULAR_SMOOTH_MUSCLE_CONTRACTION         |
| 11:10660840  | <i>RNF141</i>   | KEGG_VASCULAR_SMOOTH_MUSCLE_CONTRACTION         |
| 16:50300511  | <i>CASC16</i>   | KEGG_VASCULAR_SMOOTH_MUSCLE_CONTRACTION         |
| 16:50317039  | <i>CASC16</i>   | KEGG_VASCULAR_SMOOTH_MUSCLE_CONTRACTION         |
| 9:33447547   | <i>UBAP2</i>    | KEGG_VASOPRESSIN_REGULATED_WATER_REABSORPTION   |
| 17:44800946  | <i>WNT3</i>     | KEGG_VASOPRESSIN_REGULATED_WATER_REABSORPTION   |
| 17:44833217  | <i>WNT3</i>     | KEGG_VASOPRESSIN_REGULATED_WATER_REABSORPTION   |
| 12:124219791 | <i>HIP1R</i>    | KEGG_VIBRIO_CHOLERAE_INFECTION                  |
| 3:49561208   | <i>IP6K2</i>    | KEGG_VIRAL_MYOCARDITIS                          |
| 6:29798642   | <i>TRIM40</i>   | KEGG_VIRAL_MYOCARDITIS                          |
| 6:32602372   | <i>HLA-DRB5</i> | KEGG_VIRAL_MYOCARDITIS                          |
| 6:32930679   | <i>HLA-DRB5</i> | KEGG_VIRAL_MYOCARDITIS                          |
| 6:32934409   | <i>HLA-DRB5</i> | KEGG_VIRAL_MYOCARDITIS                          |
| 6:32973303   | <i>HLA-DRB5</i> | KEGG_VIRAL_MYOCARDITIS                          |
| 6:32974268   | <i>HLA-DRB5</i> | KEGG_VIRAL_MYOCARDITIS                          |
| 6:112137847  | <i>FYN</i>      | KEGG_VIRAL_MYOCARDITIS                          |
| 6:112151452  | <i>FYN</i>      | KEGG_VIRAL_MYOCARDITIS                          |
| 6:112175069  | <i>FYN</i>      | KEGG_VIRAL_MYOCARDITIS                          |
| 16:30510571  | <i>SETD1A</i>   | KEGG_VIRAL_MYOCARDITIS                          |
| 16:30516492  | <i>SETD1A</i>   | KEGG_VIRAL_MYOCARDITIS                          |
| 16:30520856  | <i>SETD1A</i>   | KEGG_VIRAL_MYOCARDITIS                          |
| 3:49406095   | <i>IP6K2</i>    | KEGG_WNT_SIGNALING_PATHWAY                      |
| 3:49424231   | <i>IP6K2</i>    | KEGG_WNT_SIGNALING_PATHWAY                      |
| 3:49450137   | <i>IP6K2</i>    | KEGG_WNT_SIGNALING_PATHWAY                      |
| 4:114424939  | <i>CAMK2D</i>   | KEGG_WNT_SIGNALING_PATHWAY                      |
| 4:114494052  | <i>CAMK2D</i>   | KEGG_WNT_SIGNALING_PATHWAY                      |
| 4:114529492  | <i>CAMK2D</i>   | KEGG_WNT_SIGNALING_PATHWAY                      |
| 4:114539964  | <i>CAMK2D</i>   | KEGG_WNT_SIGNALING_PATHWAY                      |
| 4:114597918  | <i>CAMK2D</i>   | KEGG_WNT_SIGNALING_PATHWAY                      |
| 5:133558885  | <i>C5orf24</i>  | KEGG_WNT_SIGNALING_PATHWAY                      |
| 10:103185542 | <i>GBF1</i>     | KEGG_WNT_SIGNALING_PATHWAY                      |
| 10:103305087 | <i>GBF1</i>     | KEGG_WNT_SIGNALING_PATHWAY                      |
| 10:103308244 | <i>GBF1</i>     | KEGG_WNT_SIGNALING_PATHWAY                      |
| 16:50612930  | <i>CASC16</i>   | KEGG_WNT_SIGNALING_PATHWAY                      |
| 16:50643086  | <i>CASC16</i>   | KEGG_WNT_SIGNALING_PATHWAY                      |
| 17:7129974   | <i>V1NB1</i>    | KEGG_WNT_SIGNALING_PATHWAY                      |
| 17:7578671   | <i>V1NB1</i>    | KEGG_WNT_SIGNALING_PATHWAY                      |
| 17:44843651  | <i>WNT3</i>     | KEGG_WNT_SIGNALING_PATHWAY                      |
| 17:44870978  | <i>WNT3</i>     | KEGG_WNT_SIGNALING_PATHWAY                      |
| 17:44871422  | <i>WNT3</i>     | KEGG_WNT_SIGNALING_PATHWAY                      |
| 17:44888209  | <i>WNT3</i>     | KEGG_WNT_SIGNALING_PATHWAY                      |

|             |                 |                            |
|-------------|-----------------|----------------------------|
| 17:44888715 | <i>WNT3</i>     | KEGG_WNT_SIGNALING_PATHWAY |
| 17:44906949 | <i>WNT3</i>     | KEGG_WNT_SIGNALING_PATHWAY |
| 17:44912901 | <i>WNT3</i>     | KEGG_WNT_SIGNALING_PATHWAY |
| 17:44931399 | <i>WNT3</i>     | KEGG_WNT_SIGNALING_PATHWAY |
| 17:44947756 | <i>WNT3</i>     | KEGG_WNT_SIGNALING_PATHWAY |
| 3:49162284  | <i>IP6K2</i>    | NABA_BASEMENT_MEMBRANES    |
| 3:49162583  | <i>IP6K2</i>    | NABA_BASEMENT_MEMBRANES    |
| 6:112494762 | <i>FYN</i>      | NABA_BASEMENT_MEMBRANES    |
| 6:112531401 | <i>FYN</i>      | NABA_BASEMENT_MEMBRANES    |
| 6:112561154 | <i>FYN</i>      | NABA_BASEMENT_MEMBRANES    |
| 6:112561430 | <i>FYN</i>      | NABA_BASEMENT_MEMBRANES    |
| 6:33153528  | <i>HLA-DRB5</i> | NABA_COLLAGENS             |
| 3:49162284  | <i>IP6K2</i>    | NABA_CORE_MATRISOME        |
| 3:49162583  | <i>IP6K2</i>    | NABA_CORE_MATRISOME        |
| 4:90804532  | <i>SNCA_2</i>   | NABA_CORE_MATRISOME        |
| 4:90868355  | <i>SNCA_2</i>   | NABA_CORE_MATRISOME        |
| 6:32031904  | <i>HLA-DRB5</i> | NABA_CORE_MATRISOME        |
| 6:32062687  | <i>HLA-DRB5</i> | NABA_CORE_MATRISOME        |
| 6:33153528  | <i>HLA-DRB5</i> | NABA_CORE_MATRISOME        |
| 6:112494762 | <i>FYN</i>      | NABA_CORE_MATRISOME        |
| 6:112531401 | <i>FYN</i>      | NABA_CORE_MATRISOME        |
| 6:112561154 | <i>FYN</i>      | NABA_CORE_MATRISOME        |
| 6:112561430 | <i>FYN</i>      | NABA_CORE_MATRISOME        |
| 8:22007293  | <i>BIN3</i>     | NABA_CORE_MATRISOME        |
| 14:75057014 | <i>RPS6KL1</i>  | NABA_CORE_MATRISOME        |
| 3:122645304 | <i>KPNA1</i>    | NABA_ECM_AFFILIATED        |
| 3:122720608 | <i>KPNA1</i>    | NABA_ECM_AFFILIATED        |
| 4:15400087  | <i>BST1</i>     | NABA_ECM_AFFILIATED        |
| 6:31002527  | <i>TRIM40</i>   | NABA_ECM_AFFILIATED        |
| 12:40798608 | <i>LRRK2_2</i>  | NABA_ECM_AFFILIATED        |
| 12:40800267 | <i>LRRK2_2</i>  | NABA_ECM_AFFILIATED        |
| 12:40837264 | <i>LRRK2_2</i>  | NABA_ECM_AFFILIATED        |
| 12:40837331 | <i>LRRK2_2</i>  | NABA_ECM_AFFILIATED        |
| 12:40872410 | <i>LRRK2_2</i>  | NABA_ECM_AFFILIATED        |
| 12:40918443 | <i>LRRK2_2</i>  | NABA_ECM_AFFILIATED        |
| 3:49162284  | <i>IP6K2</i>    | NABA_ECM_GLYCOPROTEINS     |
| 3:49162583  | <i>IP6K2</i>    | NABA_ECM_GLYCOPROTEINS     |
| 4:90804532  | <i>SNCA_2</i>   | NABA_ECM_GLYCOPROTEINS     |
| 4:90868355  | <i>SNCA_2</i>   | NABA_ECM_GLYCOPROTEINS     |
| 6:32031904  | <i>HLA-DRB5</i> | NABA_ECM_GLYCOPROTEINS     |
| 6:32062687  | <i>HLA-DRB5</i> | NABA_ECM_GLYCOPROTEINS     |
| 6:112494762 | <i>FYN</i>      | NABA_ECM_GLYCOPROTEINS     |
| 6:112531401 | <i>FYN</i>      | NABA_ECM_GLYCOPROTEINS     |
| 6:112561154 | <i>FYN</i>      | NABA_ECM_GLYCOPROTEINS     |
| 6:112561430 | <i>FYN</i>      | NABA_ECM_GLYCOPROTEINS     |
| 8:22007293  | <i>BIN3</i>     | NABA_ECM_GLYCOPROTEINS     |
| 14:75057014 | <i>RPS6KL1</i>  | NABA_ECM_GLYCOPROTEINS     |
| 1:155027082 | <i>GBAP1</i>    | NABA_ECM_REGULATORS        |
| 1:155033317 | <i>GBAP1</i>    | NABA_ECM_REGULATORS        |
| 8:11712443  | <i>CTSB</i>     | NABA_ECM_REGULATORS        |
| 8:23190941  | <i>BIN3</i>     | NABA_ECM_REGULATORS        |
| 8:23212542  | <i>BIN3</i>     | NABA_ECM_REGULATORS        |
| 8:23216225  | <i>BIN3</i>     | NABA_ECM_REGULATORS        |

|             |                     |                           |
|-------------|---------------------|---------------------------|
| 8:23223713  | <i>BIN3</i>         | NABA_ECM_REGULATORS       |
| 9:18502815  | <i>SH3GL2_2</i>     | NABA_ECM_REGULATORS       |
| 9:18522254  | <i>SH3GL2_2</i>     | NABA_ECM_REGULATORS       |
| 9:18583014  | <i>SH3GL2_2</i>     | NABA_ECM_REGULATORS       |
| 9:18623302  | <i>SH3GL2_2</i>     | NABA_ECM_REGULATORS       |
| 9:18633417  | <i>SH3GL2_2</i>     | NABA_ECM_REGULATORS       |
| 9:18663540  | <i>SH3GL2_2</i>     | NABA_ECM_REGULATORS       |
| 9:18721847  | <i>SH3GL2_2</i>     | NABA_ECM_REGULATORS       |
| 9:18725820  | <i>SH3GL2_2</i>     | NABA_ECM_REGULATORS       |
| 9:33791164  | <i>UBAP2</i>        | NABA_ECM_REGULATORS       |
| 17:42855931 | <i>CRHR1_2</i>      | NABA_ECM_REGULATORS       |
| 17:76869878 | <i>DNAH17</i>       | NABA_ECM_REGULATORS       |
| 1:155027082 | <i>GBAP1</i>        | NABA_MATRISOME_ASSOCIATED |
| 1:155033317 | <i>GBAP1</i>        | NABA_MATRISOME_ASSOCIATED |
| 1:226074321 | <i>ITPKB</i>        | NABA_MATRISOME_ASSOCIATED |
| 3:122645304 | <i>KPNA1</i>        | NABA_MATRISOME_ASSOCIATED |
| 3:122720608 | <i>KPNA1</i>        | NABA_MATRISOME_ASSOCIATED |
| 4:15400087  | <i>BST1</i>         | NABA_MATRISOME_ASSOCIATED |
| 4:76924571  | <i>FAM47E-STBD1</i> | NABA_MATRISOME_ASSOCIATED |
| 6:31002527  | <i>TRIM40</i>       | NABA_MATRISOME_ASSOCIATED |
| 8:11712443  | <i>CTSB</i>         | NABA_MATRISOME_ASSOCIATED |
| 8:23190941  | <i>BIN3</i>         | NABA_MATRISOME_ASSOCIATED |
| 8:23212542  | <i>BIN3</i>         | NABA_MATRISOME_ASSOCIATED |
| 8:23216225  | <i>BIN3</i>         | NABA_MATRISOME_ASSOCIATED |
| 8:23223713  | <i>BIN3</i>         | NABA_MATRISOME_ASSOCIATED |
| 9:18502815  | <i>SH3GL2_2</i>     | NABA_MATRISOME_ASSOCIATED |
| 9:18522254  | <i>SH3GL2_2</i>     | NABA_MATRISOME_ASSOCIATED |
| 9:18583014  | <i>SH3GL2_2</i>     | NABA_MATRISOME_ASSOCIATED |
| 9:18623302  | <i>SH3GL2_2</i>     | NABA_MATRISOME_ASSOCIATED |
| 9:18633417  | <i>SH3GL2_2</i>     | NABA_MATRISOME_ASSOCIATED |
| 9:18663540  | <i>SH3GL2_2</i>     | NABA_MATRISOME_ASSOCIATED |
| 9:18721847  | <i>SH3GL2_2</i>     | NABA_MATRISOME_ASSOCIATED |
| 9:18725820  | <i>SH3GL2_2</i>     | NABA_MATRISOME_ASSOCIATED |
| 9:33791164  | <i>UBAP2</i>        | NABA_MATRISOME_ASSOCIATED |
| 12:40798608 | <i>LRRK2_2</i>      | NABA_MATRISOME_ASSOCIATED |
| 12:40800267 | <i>LRRK2_2</i>      | NABA_MATRISOME_ASSOCIATED |
| 12:40837264 | <i>LRRK2_2</i>      | NABA_MATRISOME_ASSOCIATED |
| 12:40837331 | <i>LRRK2_2</i>      | NABA_MATRISOME_ASSOCIATED |
| 12:40872410 | <i>LRRK2_2</i>      | NABA_MATRISOME_ASSOCIATED |
| 12:40918443 | <i>LRRK2_2</i>      | NABA_MATRISOME_ASSOCIATED |
| 17:42855931 | <i>CRHR1_2</i>      | NABA_MATRISOME_ASSOCIATED |
| 17:44843651 | <i>WNT3</i>         | NABA_MATRISOME_ASSOCIATED |
| 17:44870978 | <i>WNT3</i>         | NABA_MATRISOME_ASSOCIATED |
| 17:44871422 | <i>WNT3</i>         | NABA_MATRISOME_ASSOCIATED |
| 17:44888209 | <i>WNT3</i>         | NABA_MATRISOME_ASSOCIATED |
| 17:44888715 | <i>WNT3</i>         | NABA_MATRISOME_ASSOCIATED |
| 17:44906949 | <i>WNT3</i>         | NABA_MATRISOME_ASSOCIATED |
| 17:44912901 | <i>WNT3</i>         | NABA_MATRISOME_ASSOCIATED |
| 17:44931399 | <i>WNT3</i>         | NABA_MATRISOME_ASSOCIATED |
| 17:44947756 | <i>WNT3</i>         | NABA_MATRISOME_ASSOCIATED |
| 17:76869878 | <i>DNAH17</i>       | NABA_MATRISOME_ASSOCIATED |
| 19:2251817  | <i>SPPL2B</i>       | NABA_MATRISOME_ASSOCIATED |
| 1:155027082 | <i>GBAP1</i>        | NABA_MATRISOME            |

|             |                     |                       |
|-------------|---------------------|-----------------------|
| 1:155033317 | <i>GBAP1</i>        | NABA_MATRISOME        |
| 1:226074321 | <i>ITPKB</i>        | NABA_MATRISOME        |
| 3:49162284  | <i>IP6K2</i>        | NABA_MATRISOME        |
| 3:49162583  | <i>IP6K2</i>        | NABA_MATRISOME        |
| 3:122645304 | <i>KPNA1</i>        | NABA_MATRISOME        |
| 3:122720608 | <i>KPNA1</i>        | NABA_MATRISOME        |
| 4:15400087  | <i>BST1</i>         | NABA_MATRISOME        |
| 4:76924571  | <i>FAM47E-STBD1</i> | NABA_MATRISOME        |
| 4:90804532  | <i>SNCA_2</i>       | NABA_MATRISOME        |
| 4:90868355  | <i>SNCA_2</i>       | NABA_MATRISOME        |
| 6:31002527  | <i>TRIM40</i>       | NABA_MATRISOME        |
| 6:32031904  | <i>HLA-DRB5</i>     | NABA_MATRISOME        |
| 6:32062687  | <i>HLA-DRB5</i>     | NABA_MATRISOME        |
| 6:33153528  | <i>HLA-DRB5</i>     | NABA_MATRISOME        |
| 6:112494762 | <i>FYN</i>          | NABA_MATRISOME        |
| 6:112531401 | <i>FYN</i>          | NABA_MATRISOME        |
| 6:112561154 | <i>FYN</i>          | NABA_MATRISOME        |
| 6:112561430 | <i>FYN</i>          | NABA_MATRISOME        |
| 8:11712443  | <i>CTSB</i>         | NABA_MATRISOME        |
| 8:22007293  | <i>BIN3</i>         | NABA_MATRISOME        |
| 8:23190941  | <i>BIN3</i>         | NABA_MATRISOME        |
| 8:23212542  | <i>BIN3</i>         | NABA_MATRISOME        |
| 8:23216225  | <i>BIN3</i>         | NABA_MATRISOME        |
| 8:23223713  | <i>BIN3</i>         | NABA_MATRISOME        |
| 9:18502815  | <i>SH3GL2_2</i>     | NABA_MATRISOME        |
| 9:18522254  | <i>SH3GL2_2</i>     | NABA_MATRISOME        |
| 9:18583014  | <i>SH3GL2_2</i>     | NABA_MATRISOME        |
| 9:18623302  | <i>SH3GL2_2</i>     | NABA_MATRISOME        |
| 9:18633417  | <i>SH3GL2_2</i>     | NABA_MATRISOME        |
| 9:18663540  | <i>SH3GL2_2</i>     | NABA_MATRISOME        |
| 9:18721847  | <i>SH3GL2_2</i>     | NABA_MATRISOME        |
| 9:18725820  | <i>SH3GL2_2</i>     | NABA_MATRISOME        |
| 9:33791164  | <i>UBAP2</i>        | NABA_MATRISOME        |
| 12:40798608 | <i>LRRK2_2</i>      | NABA_MATRISOME        |
| 12:40800267 | <i>LRRK2_2</i>      | NABA_MATRISOME        |
| 12:40837264 | <i>LRRK2_2</i>      | NABA_MATRISOME        |
| 12:40837331 | <i>LRRK2_2</i>      | NABA_MATRISOME        |
| 12:40872410 | <i>LRRK2_2</i>      | NABA_MATRISOME        |
| 12:40918443 | <i>LRRK2_2</i>      | NABA_MATRISOME        |
| 14:75057014 | <i>RPS6KL1</i>      | NABA_MATRISOME        |
| 17:42855931 | <i>CRHR1_2</i>      | NABA_MATRISOME        |
| 17:44843651 | <i>WNT3</i>         | NABA_MATRISOME        |
| 17:44870978 | <i>WNT3</i>         | NABA_MATRISOME        |
| 17:44871422 | <i>WNT3</i>         | NABA_MATRISOME        |
| 17:44888209 | <i>WNT3</i>         | NABA_MATRISOME        |
| 17:44888715 | <i>WNT3</i>         | NABA_MATRISOME        |
| 17:44906949 | <i>WNT3</i>         | NABA_MATRISOME        |
| 17:44912901 | <i>WNT3</i>         | NABA_MATRISOME        |
| 17:44931399 | <i>WNT3</i>         | NABA_MATRISOME        |
| 17:44947756 | <i>WNT3</i>         | NABA_MATRISOME        |
| 17:76869878 | <i>DNAH17</i>       | NABA_MATRISOME        |
| 19:2251817  | <i>SPPL2B</i>       | NABA_MATRISOME        |
| 1:226074321 | <i>ITPKB</i>        | NABA_SECRETED_FACTORS |

|              |                     |                                   |
|--------------|---------------------|-----------------------------------|
| 4:76924571   | <i>FAM47E-STBD1</i> | NABA_SECRETED_FACTORS             |
| 17:7455536   | <i>V1NB1</i>        | NABA_SECRETED_FACTORS             |
| 17:44843651  | <i>WNT3</i>         | NABA_SECRETED_FACTORS             |
| 17:44870978  | <i>WNT3</i>         | NABA_SECRETED_FACTORS             |
| 17:44871422  | <i>WNT3</i>         | NABA_SECRETED_FACTORS             |
| 17:44888209  | <i>WNT3</i>         | NABA_SECRETED_FACTORS             |
| 17:44888715  | <i>WNT3</i>         | NABA_SECRETED_FACTORS             |
| 17:44906949  | <i>WNT3</i>         | NABA_SECRETED_FACTORS             |
| 17:44912901  | <i>WNT3</i>         | NABA_SECRETED_FACTORS             |
| 17:44931399  | <i>WNT3</i>         | NABA_SECRETED_FACTORS             |
| 17:44947756  | <i>WNT3</i>         | NABA_SECRETED_FACTORS             |
| 19:2251817   | <i>SPPL2B</i>       | NABA_SECRETED_FACTORS             |
| 3:49162284   | <i>IP6K2</i>        | PID_A6B1_A6B4_INTEGRIN_PATHWAY    |
| 3:49162583   | <i>IP6K2</i>        | PID_A6B1_A6B4_INTEGRIN_PATHWAY    |
| 6:112494762  | <i>FYN</i>          | PID_A6B1_A6B4_INTEGRIN_PATHWAY    |
| 6:112531401  | <i>FYN</i>          | PID_A6B1_A6B4_INTEGRIN_PATHWAY    |
| 6:112561154  | <i>FYN</i>          | PID_A6B1_A6B4_INTEGRIN_PATHWAY    |
| 6:112561430  | <i>FYN</i>          | PID_A6B1_A6B4_INTEGRIN_PATHWAY    |
| 6:112137847  | <i>FYN</i>          | PID_AJDISS_2PATHWAY               |
| 6:112151452  | <i>FYN</i>          | PID_AJDISS_2PATHWAY               |
| 6:112175069  | <i>FYN</i>          | PID_AJDISS_2PATHWAY               |
| 17:39883520  | <i>RETREG3</i>      | PID_AJDISS_2PATHWAY               |
| 19:2251817   | <i>SPPL2B</i>       | PID_ALK2_PATHWAY                  |
| 4:90677243   | <i>SNCA_2</i>       | PID_ALPHA_SYNUCLEIN_PATHWAY       |
| 4:90700329   | <i>SNCA_2</i>       | PID_ALPHA_SYNUCLEIN_PATHWAY       |
| 4:90703993   | <i>SNCA_2</i>       | PID_ALPHA_SYNUCLEIN_PATHWAY       |
| 4:90738839   | <i>SNCA_2</i>       | PID_ALPHA_SYNUCLEIN_PATHWAY       |
| 4:90757294   | <i>SNCA_2</i>       | PID_ALPHA_SYNUCLEIN_PATHWAY       |
| 6:112137847  | <i>FYN</i>          | PID_ALPHA_SYNUCLEIN_PATHWAY       |
| 6:112151452  | <i>FYN</i>          | PID_ALPHA_SYNUCLEIN_PATHWAY       |
| 6:112175069  | <i>FYN</i>          | PID_ALPHA_SYNUCLEIN_PATHWAY       |
| 8:11353586   | <i>CTSB</i>         | PID_ALPHA_SYNUCLEIN_PATHWAY       |
| 8:11363667   | <i>CTSB</i>         | PID_ALPHA_SYNUCLEIN_PATHWAY       |
| 8:11381148   | <i>CTSB</i>         | PID_ALPHA_SYNUCLEIN_PATHWAY       |
| 10:121054578 | <i>INPP5F</i>       | PID_ALPHA_SYNUCLEIN_PATHWAY       |
| 10:121077191 | <i>INPP5F</i>       | PID_ALPHA_SYNUCLEIN_PATHWAY       |
| 10:121085648 | <i>INPP5F</i>       | PID_ALPHA_SYNUCLEIN_PATHWAY       |
| 10:121104943 | <i>INPP5F</i>       | PID_ALPHA_SYNUCLEIN_PATHWAY       |
| 10:121114292 | <i>INPP5F</i>       | PID_ALPHA_SYNUCLEIN_PATHWAY       |
| 10:121191186 | <i>INPP5F</i>       | PID_ALPHA_SYNUCLEIN_PATHWAY       |
| 10:121201427 | <i>INPP5F</i>       | PID_ALPHA_SYNUCLEIN_PATHWAY       |
| 3:49406095   | <i>IP6K2</i>        | PID_AMB2_NEUTROPHILS_PATHWAY      |
| 3:49424231   | <i>IP6K2</i>        | PID_AMB2_NEUTROPHILS_PATHWAY      |
| 3:49450137   | <i>IP6K2</i>        | PID_AMB2_NEUTROPHILS_PATHWAY      |
| 6:32151443   | <i>HLA-DRB5</i>     | PID_AMB2_NEUTROPHILS_PATHWAY      |
| 6:112137847  | <i>FYN</i>          | PID_AMB2_NEUTROPHILS_PATHWAY      |
| 6:112151452  | <i>FYN</i>          | PID_AMB2_NEUTROPHILS_PATHWAY      |
| 6:112175069  | <i>FYN</i>          | PID_AMB2_NEUTROPHILS_PATHWAY      |
| 8:11353586   | <i>CTSB</i>         | PID_AMB2_NEUTROPHILS_PATHWAY      |
| 8:11363667   | <i>CTSB</i>         | PID_AMB2_NEUTROPHILS_PATHWAY      |
| 8:11381148   | <i>CTSB</i>         | PID_AMB2_NEUTROPHILS_PATHWAY      |
| 11:133947732 | <i>IGSF9B</i>       | PID_AMB2_NEUTROPHILS_PATHWAY      |
| 6:112137847  | <i>FYN</i>          | PID_ANGIOPOIETIN_RECEPTOR_PATHWAY |

|              |                     |                                   |
|--------------|---------------------|-----------------------------------|
| 6:112151452  | <i>FYN</i>          | PID_ANGIOPOIETIN_RECEPTOR_PATHWAY |
| 6:112175069  | <i>FYN</i>          | PID_ANGIOPOIETIN_RECEPTOR_PATHWAY |
| 17:40392358  | <i>RETREG3</i>      | PID_ANGIOPOIETIN_RECEPTOR_PATHWAY |
| 17:7578671   | <i>V1NB1</i>        | PID_AP1_PATHWAY                   |
| 4:76695927   | <i>FAM47E-STBD1</i> | PID_ARF_3PATHWAY                  |
| 8:131145058  | <i>FAM49B</i>       | PID_ARF_3PATHWAY                  |
| 8:131153067  | <i>FAM49B</i>       | PID_ARF_3PATHWAY                  |
| 8:131245821  | <i>FAM49B</i>       | PID_ARF_3PATHWAY                  |
| 8:131328260  | <i>FAM49B</i>       | PID_ARF_3PATHWAY                  |
| 8:131404984  | <i>FAM49B</i>       | PID_ARF_3PATHWAY                  |
| 8:131408202  | <i>FAM49B</i>       | PID_ARF_3PATHWAY                  |
| 8:131455469  | <i>FAM49B</i>       | PID_ARF_3PATHWAY                  |
| 10:104005410 | <i>GBF1</i>         | PID_ARF_3PATHWAY                  |
| 10:104034550 | <i>GBF1</i>         | PID_ARF_3PATHWAY                  |
| 17:45020426  | <i>WNT3</i>         | PID_ARF_3PATHWAY                  |
| 17:45059032  | <i>WNT3</i>         | PID_ARF_3PATHWAY                  |
| 17:45089680  | <i>WNT3</i>         | PID_ARF_3PATHWAY                  |
| 3:49406095   | <i>IP6K2</i>        | PID_ARF6_DOWNSTREAM_PATHWAY       |
| 3:49424231   | <i>IP6K2</i>        | PID_ARF6_DOWNSTREAM_PATHWAY       |
| 3:49450137   | <i>IP6K2</i>        | PID_ARF6_DOWNSTREAM_PATHWAY       |
| 17:42454243  | <i>FAM171A2</i>     | PID_ARF6_PATHWAY                  |
| 19:3142784   | <i>SPPL2B</i>       | PID_ARF6_PATHWAY                  |
| 19:3147326   | <i>SPPL2B</i>       | PID_ARF6_PATHWAY                  |
| 10:15562608  | <i>ITGA8</i>        | PID_ARF6_TRAFFICKING_PATHWAY      |
| 10:15569598  | <i>ITGA8</i>        | PID_ARF6_TRAFFICKING_PATHWAY      |
| 10:15652368  | <i>ITGA8</i>        | PID_ARF6_TRAFFICKING_PATHWAY      |
| 4:76407998   | <i>FAM47E-STBD1</i> | PID_AR_TF_PATHWAY                 |
| 6:31862876   | <i>HLA-DRB5</i>     | PID_AR_TF_PATHWAY                 |
| 5:134722833  | <i>C5orf24</i>      | PID_ATF2_PATHWAY                  |
| 3:48199695   | <i>IP6K2</i>        | PID_ATM_PATHWAY                   |
| 3:48214438   | <i>IP6K2</i>        | PID_ATM_PATHWAY                   |
| 3:48199695   | <i>IP6K2</i>        | PID_ATR_PATHWAY                   |
| 3:48214438   | <i>IP6K2</i>        | PID_ATR_PATHWAY                   |
| 5:133558885  | <i>C5orf24</i>      | PID_ATR_PATHWAY                   |
| 17:7578671   | <i>V1NB1</i>        | PID_AURORA_A_PATHWAY              |
| 3:49406095   | <i>IP6K2</i>        | PID_AURORA_B_PATHWAY              |
| 3:49424231   | <i>IP6K2</i>        | PID_AURORA_B_PATHWAY              |
| 3:49450137   | <i>IP6K2</i>        | PID_AURORA_B_PATHWAY              |
| 3:49406095   | <i>IP6K2</i>        | PID_AVB3_INTEGRIN_PATHWAY         |
| 3:49424231   | <i>IP6K2</i>        | PID_AVB3_INTEGRIN_PATHWAY         |
| 3:49450137   | <i>IP6K2</i>        | PID_AVB3_INTEGRIN_PATHWAY         |
| 6:33153528   | <i>HLA-DRB5</i>     | PID_AVB3_INTEGRIN_PATHWAY         |
| 3:49406095   | <i>IP6K2</i>        | PID_AVB3_OPN_PATHWAY              |
| 3:49424231   | <i>IP6K2</i>        | PID_AVB3_OPN_PATHWAY              |
| 3:49450137   | <i>IP6K2</i>        | PID_AVB3_OPN_PATHWAY              |
| 17:43390763  | <i>CRHR1_2</i>      | PID_AVB3_OPN_PATHWAY              |
| 17:7578671   | <i>V1NB1</i>        | PID_BARD1_PATHWAY                 |
| 17:7129974   | <i>V1NB1</i>        | PID_BETA_CATENIN_DEG_PATHWAY      |
| 16:50300511  | <i>CASC16</i>       | PID_BETA_CATENIN_NUC_PATHWAY      |
| 16:50317039  | <i>CASC16</i>       | PID_BETA_CATENIN_NUC_PATHWAY      |
| 19:3008151   | <i>SPPL2B</i>       | PID_BETA_CATENIN_NUC_PATHWAY      |
| 19:3024077   | <i>SPPL2B</i>       | PID_BETA_CATENIN_NUC_PATHWAY      |
| 1:156059276  | <i>GBAP1</i>        | PID_CASPASE_PATHWAY               |

|             |                     |                                     |
|-------------|---------------------|-------------------------------------|
| 1:226568665 | <i>ITPKB</i>        | PID_CASPASE_PATHWAY                 |
| 3:18395010  | <i>SATB1</i>        | PID_CASPASE_PATHWAY                 |
| 3:18472577  | <i>SATB1</i>        | PID_CASPASE_PATHWAY                 |
| 17:43390763 | <i>CRHR1_2</i>      | PID_CD40_PATHWAY                    |
| 6:112137847 | <i>FYN</i>          | PID_CD8_TCR_PATHWAY                 |
| 6:112151452 | <i>FYN</i>          | PID_CD8_TCR_PATHWAY                 |
| 6:112175069 | <i>FYN</i>          | PID_CD8_TCR_PATHWAY                 |
| 17:43390763 | <i>CRHR1_2</i>      | PID_CD8_TCR_PATHWAY                 |
| 1:227182033 | <i>ITPKB</i>        | PID_CDC42_PATHWAY                   |
| 1:227270318 | <i>ITPKB</i>        | PID_CDC42_PATHWAY                   |
| 2:102357447 | <i>MAP4K4</i>       | PID_CERAMIDE_PATHWAY                |
| 2:102379173 | <i>MAP4K4</i>       | PID_CERAMIDE_PATHWAY                |
| 2:102413116 | <i>MAP4K4</i>       | PID_CERAMIDE_PATHWAY                |
| 2:101439596 | <i>MAP4K4</i>       | PID_CIRCADIAN_PATHWAY               |
| 2:101464631 | <i>MAP4K4</i>       | PID_CIRCADIAN_PATHWAY               |
| 2:101547064 | <i>MAP4K4</i>       | PID_CIRCADIAN_PATHWAY               |
| 2:101550181 | <i>MAP4K4</i>       | PID_CIRCADIAN_PATHWAY               |
| 2:101578010 | <i>MAP4K4</i>       | PID_CIRCADIAN_PATHWAY               |
| 2:101603812 | <i>MAP4K4</i>       | PID_CIRCADIAN_PATHWAY               |
| 4:76924571  | <i>FAM47E-STBD1</i> | PID_CXCR3_PATHWAY                   |
| 16:30510571 | <i>SETD1A</i>       | PID_CXCR3_PATHWAY                   |
| 16:30516492 | <i>SETD1A</i>       | PID_CXCR3_PATHWAY                   |
| 16:30520856 | <i>SETD1A</i>       | PID_CXCR3_PATHWAY                   |
| 3:49406095  | <i>IP6K2</i>        | PID_CXCR4_PATHWAY                   |
| 3:49424231  | <i>IP6K2</i>        | PID_CXCR4_PATHWAY                   |
| 3:49450137  | <i>IP6K2</i>        | PID_CXCR4_PATHWAY                   |
| 6:112137847 | <i>FYN</i>          | PID_CXCR4_PATHWAY                   |
| 6:112151452 | <i>FYN</i>          | PID_CXCR4_PATHWAY                   |
| 6:112175069 | <i>FYN</i>          | PID_CXCR4_PATHWAY                   |
| 8:11353586  | <i>CTSB</i>         | PID_CXCR4_PATHWAY                   |
| 8:11363667  | <i>CTSB</i>         | PID_CXCR4_PATHWAY                   |
| 8:11381148  | <i>CTSB</i>         | PID_CXCR4_PATHWAY                   |
| 10:15562608 | <i>ITGA8</i>        | PID_CXCR4_PATHWAY                   |
| 10:15569598 | <i>ITGA8</i>        | PID_CXCR4_PATHWAY                   |
| 10:15652368 | <i>ITGA8</i>        | PID_CXCR4_PATHWAY                   |
| 17:40392358 | <i>RETREG3</i>      | PID_CXCR4_PATHWAY                   |
| 3:48199695  | <i>IP6K2</i>        | PID_E2F_PATHWAY                     |
| 3:48214438  | <i>IP6K2</i>        | PID_E2F_PATHWAY                     |
| 17:76177567 | <i>DNAH17</i>       | PID_E2F_PATHWAY                     |
| 3:49406095  | <i>IP6K2</i>        | PID_ECADHERIN_KERATINOCYTE_PATHWAY  |
| 3:49424231  | <i>IP6K2</i>        | PID_ECADHERIN_KERATINOCYTE_PATHWAY  |
| 3:49450137  | <i>IP6K2</i>        | PID_ECADHERIN_KERATINOCYTE_PATHWAY  |
| 6:112137847 | <i>FYN</i>          | PID_ECADHERIN_KERATINOCYTE_PATHWAY  |
| 6:112151452 | <i>FYN</i>          | PID_ECADHERIN_KERATINOCYTE_PATHWAY  |
| 6:112175069 | <i>FYN</i>          | PID_ECADHERIN_KERATINOCYTE_PATHWAY  |
| 17:39883520 | <i>RETREG3</i>      | PID_ECADHERIN_KERATINOCYTE_PATHWAY  |
| 3:49406095  | <i>IP6K2</i>        | PID_ECADHERIN_NASCENT_AJ_PATHWAY    |
| 3:49424231  | <i>IP6K2</i>        | PID_ECADHERIN_NASCENT_AJ_PATHWAY    |
| 3:49450137  | <i>IP6K2</i>        | PID_ECADHERIN_NASCENT_AJ_PATHWAY    |
| 17:39883520 | <i>RETREG3</i>      | PID_ECADHERIN_NASCENT_AJ_PATHWAY    |
| 3:49406095  | <i>IP6K2</i>        | PID_ECADHERIN_STABILIZATION_PATHWAY |
| 3:49424231  | <i>IP6K2</i>        | PID_ECADHERIN_STABILIZATION_PATHWAY |
| 3:49450137  | <i>IP6K2</i>        | PID_ECADHERIN_STABILIZATION_PATHWAY |

|             |                 |                                     |
|-------------|-----------------|-------------------------------------|
| 9:33447547  | <i>UBAP2</i>    | PID_ECADHERIN_STABILIZATION_PATHWAY |
| 3:49406095  | <i>IP6K2</i>    | PID_ENDOTHELIN_PATHWAY              |
| 3:49424231  | <i>IP6K2</i>    | PID_ENDOTHELIN_PATHWAY              |
| 3:49450137  | <i>IP6K2</i>    | PID_ENDOTHELIN_PATHWAY              |
| 3:123089448 | <i>KPNA1</i>    | PID_ENDOTHELIN_PATHWAY              |
| 8:131799767 | <i>FAM49B</i>   | PID_ENDOTHELIN_PATHWAY              |
| 8:131845512 | <i>FAM49B</i>   | PID_ENDOTHELIN_PATHWAY              |
| 8:131865425 | <i>FAM49B</i>   | PID_ENDOTHELIN_PATHWAY              |
| 8:131901170 | <i>FAM49B</i>   | PID_ENDOTHELIN_PATHWAY              |
| 16:50300511 | <i>CASC16</i>   | PID_ENDOTHELIN_PATHWAY              |
| 16:50317039 | <i>CASC16</i>   | PID_ENDOTHELIN_PATHWAY              |
| 19:3142784  | <i>SPPL2B</i>   | PID_ENDOTHELIN_PATHWAY              |
| 19:3147326  | <i>SPPL2B</i>   | PID_ENDOTHELIN_PATHWAY              |
| 3:49406095  | <i>IP6K2</i>    | PID_EPHA2_FWD_PATHWAY               |
| 3:49424231  | <i>IP6K2</i>    | PID_EPHA2_FWD_PATHWAY               |
| 3:49450137  | <i>IP6K2</i>    | PID_EPHA2_FWD_PATHWAY               |
| 3:49406095  | <i>IP6K2</i>    | PID_EPHA_FWDPATHWAY                 |
| 3:49424231  | <i>IP6K2</i>    | PID_EPHA_FWDPATHWAY                 |
| 3:49450137  | <i>IP6K2</i>    | PID_EPHA_FWDPATHWAY                 |
| 6:112137847 | <i>FYN</i>      | PID_EPHA_FWDPATHWAY                 |
| 6:112151452 | <i>FYN</i>      | PID_EPHA_FWDPATHWAY                 |
| 6:112175069 | <i>FYN</i>      | PID_EPHA_FWDPATHWAY                 |
| 8:11353586  | <i>CTSB</i>     | PID_EPHA_FWDPATHWAY                 |
| 8:11363667  | <i>CTSB</i>     | PID_EPHA_FWDPATHWAY                 |
| 8:11381148  | <i>CTSB</i>     | PID_EPHA_FWDPATHWAY                 |
| 2:102357447 | <i>MAP4K4</i>   | PID_EPHB_FWD_PATHWAY                |
| 2:102379173 | <i>MAP4K4</i>   | PID_EPHB_FWD_PATHWAY                |
| 2:102413116 | <i>MAP4K4</i>   | PID_EPHB_FWD_PATHWAY                |
| 6:112137847 | <i>FYN</i>      | PID_EPHRINB_REV_PATHWAY             |
| 6:112151452 | <i>FYN</i>      | PID_EPHRINB_REV_PATHWAY             |
| 6:112175069 | <i>FYN</i>      | PID_EPHRINB_REV_PATHWAY             |
| 8:11353586  | <i>CTSB</i>     | PID_EPHRINB_REV_PATHWAY             |
| 8:11363667  | <i>CTSB</i>     | PID_EPHRINB_REV_PATHWAY             |
| 8:11381148  | <i>CTSB</i>     | PID_EPHRINB_REV_PATHWAY             |
| 17:42454243 | <i>FAM171A2</i> | PID_EPHRINB_REV_PATHWAY             |
| 17:40392358 | <i>RETREG3</i>  | PID_EPO_PATHWAY                     |
| 5:133558885 | <i>C5orf24</i>  | PID_ERBB1_DOWNSTREAM_PATHWAY        |
| 9:17579690  | <i>SH3GL2_2</i> | PID_ERBB1_INTERNALIZATION_PATHWAY   |
| 9:17587160  | <i>SH3GL2_2</i> | PID_ERBB1_INTERNALIZATION_PATHWAY   |
| 9:17609302  | <i>SH3GL2_2</i> | PID_ERBB1_INTERNALIZATION_PATHWAY   |
| 9:17626762  | <i>SH3GL2_2</i> | PID_ERBB1_INTERNALIZATION_PATHWAY   |
| 9:17627444  | <i>SH3GL2_2</i> | PID_ERBB1_INTERNALIZATION_PATHWAY   |
| 9:17642664  | <i>SH3GL2_2</i> | PID_ERBB1_INTERNALIZATION_PATHWAY   |
| 9:17710876  | <i>SH3GL2_2</i> | PID_ERBB1_INTERNALIZATION_PATHWAY   |
| 9:17732590  | <i>SH3GL2_2</i> | PID_ERBB1_INTERNALIZATION_PATHWAY   |
| 9:17737514  | <i>SH3GL2_2</i> | PID_ERBB1_INTERNALIZATION_PATHWAY   |
| 9:17758945  | <i>SH3GL2_2</i> | PID_ERBB1_INTERNALIZATION_PATHWAY   |
| 6:112137847 | <i>FYN</i>      | PID_ERBB4_PATHWAY                   |
| 6:112151452 | <i>FYN</i>      | PID_ERBB4_PATHWAY                   |
| 6:112175069 | <i>FYN</i>      | PID_ERBB4_PATHWAY                   |
| 17:7101771  | <i>V1NB1</i>    | PID_ERBB4_PATHWAY                   |
| 17:40392358 | <i>RETREG3</i>  | PID_ERBB4_PATHWAY                   |
| 3:49406095  | <i>IP6K2</i>    | PID_ER_NONGENOMIC_PATHWAY           |

|              |                |                           |
|--------------|----------------|---------------------------|
| 3:49424231   | <i>IP6K2</i>   | PID_ER_NONGENOMIC_PATHWAY |
| 3:49450137   | <i>IP6K2</i>   | PID_ER_NONGENOMIC_PATHWAY |
| 19:3142784   | <i>SPPL2B</i>  | PID_ER_NONGENOMIC_PATHWAY |
| 19:3147326   | <i>SPPL2B</i>  | PID_ER_NONGENOMIC_PATHWAY |
| 3:49406095   | <i>IP6K2</i>   | PID_FAK_PATHWAY           |
| 3:49424231   | <i>IP6K2</i>   | PID_FAK_PATHWAY           |
| 3:49450137   | <i>IP6K2</i>   | PID_FAK_PATHWAY           |
| 6:112137847  | <i>FYN</i>     | PID_FAK_PATHWAY           |
| 6:112151452  | <i>FYN</i>     | PID_FAK_PATHWAY           |
| 6:112175069  | <i>FYN</i>     | PID_FAK_PATHWAY           |
| 8:131145058  | <i>FAM49B</i>  | PID_FAK_PATHWAY           |
| 8:131153067  | <i>FAM49B</i>  | PID_FAK_PATHWAY           |
| 8:131245821  | <i>FAM49B</i>  | PID_FAK_PATHWAY           |
| 8:131328260  | <i>FAM49B</i>  | PID_FAK_PATHWAY           |
| 8:131404984  | <i>FAM49B</i>  | PID_FAK_PATHWAY           |
| 8:131408202  | <i>FAM49B</i>  | PID_FAK_PATHWAY           |
| 8:131455469  | <i>FAM49B</i>  | PID_FAK_PATHWAY           |
| 17:59791813  | <i>BRIP1</i>   | PID_FANCONI_PATHWAY       |
| 17:59922925  | <i>BRIP1</i>   | PID_FANCONI_PATHWAY       |
| 6:112137847  | <i>FYN</i>     | PID_FCER1_PATHWAY         |
| 6:112151452  | <i>FYN</i>     | PID_FCER1_PATHWAY         |
| 6:112175069  | <i>FYN</i>     | PID_FCER1_PATHWAY         |
| 17:40392358  | <i>RETREG3</i> | PID_FGF_PATHWAY           |
| 6:112494762  | <i>FYN</i>     | PID_FOXM1_PATHWAY         |
| 6:112531401  | <i>FYN</i>     | PID_FOXM1_PATHWAY         |
| 6:112561154  | <i>FYN</i>     | PID_FOXM1_PATHWAY         |
| 6:112561430  | <i>FYN</i>     | PID_FOXM1_PATHWAY         |
| 17:41056283  | <i>RETREG3</i> | PID_FOXO_PATHWAY          |
| 6:112137847  | <i>FYN</i>     | PID_GLYPICAN_1PATHWAY     |
| 6:112151452  | <i>FYN</i>     | PID_GLYPICAN_1PATHWAY     |
| 6:112175069  | <i>FYN</i>     | PID_GLYPICAN_1PATHWAY     |
| 8:11353586   | <i>CTSB</i>    | PID_GLYPICAN_1PATHWAY     |
| 8:11363667   | <i>CTSB</i>    | PID_GLYPICAN_1PATHWAY     |
| 8:11381148   | <i>CTSB</i>    | PID_GLYPICAN_1PATHWAY     |
| 17:40392358  | <i>RETREG3</i> | PID_GMCSF_PATHWAY         |
| 17:7578671   | <i>V1NB1</i>   | PID_HDAC_CLASSIII_PATHWAY |
| 2:170012307  | <i>STK39</i>   | PID_HEDGEHOG_2PATHWAY     |
| 2:170028024  | <i>STK39</i>   | PID_HEDGEHOG_2PATHWAY     |
| 2:170066424  | <i>STK39</i>   | PID_HEDGEHOG_2PATHWAY     |
| 10:104278055 | <i>GBF1</i>    | PID_HEDGEHOG_GLI_PATHWAY  |
| 10:104305501 | <i>GBF1</i>    | PID_HEDGEHOG_GLI_PATHWAY  |
| 1:226568665  | <i>ITPKB</i>   | PID_HES_HEY_PATHWAY       |
| 4:114424939  | <i>CAMK2D</i>  | PID_HES_HEY_PATHWAY       |
| 4:114494052  | <i>CAMK2D</i>  | PID_HES_HEY_PATHWAY       |
| 4:114529492  | <i>CAMK2D</i>  | PID_HES_HEY_PATHWAY       |
| 4:114539964  | <i>CAMK2D</i>  | PID_HES_HEY_PATHWAY       |
| 4:114597918  | <i>CAMK2D</i>  | PID_HES_HEY_PATHWAY       |
| 8:11558567   | <i>CTSB</i>    | PID_HES_HEY_PATHWAY       |
| 8:11599269   | <i>CTSB</i>    | PID_HES_HEY_PATHWAY       |
| 19:1611856   | <i>SPPL2B</i>  | PID_HES_HEY_PATHWAY       |
| 17:7578671   | <i>V1NB1</i>   | PID_HIF1A_PATHWAY         |
| 15:61016235  | <i>VPS13C</i>  | PID_HIF1_TFPATHWAY        |
| 15:61065568  | <i>VPS13C</i>  | PID_HIF1_TFPATHWAY        |

|             |              |                        |
|-------------|--------------|------------------------|
| 15:61094298 | VPS13C       | PID_HIF1_TFPATHWAY     |
| 15:61140736 | VPS13C       | PID_HIF1_TFPATHWAY     |
| 15:61142062 | VPS13C       | PID_HIF1_TFPATHWAY     |
| 15:61162571 | VPS13C       | PID_HIF1_TFPATHWAY     |
| 15:61191617 | VPS13C       | PID_HIF1_TFPATHWAY     |
| 15:61195427 | VPS13C       | PID_HIF1_TFPATHWAY     |
| 15:61221682 | VPS13C       | PID_HIF1_TFPATHWAY     |
| 15:61298486 | VPS13C       | PID_HIF1_TFPATHWAY     |
| 15:61375480 | VPS13C       | PID_HIF1_TFPATHWAY     |
| 15:61434581 | VPS13C       | PID_HIF1_TFPATHWAY     |
| 15:61467078 | VPS13C       | PID_HIF1_TFPATHWAY     |
| 15:61470808 | VPS13C       | PID_HIF1_TFPATHWAY     |
| 15:61500263 | VPS13C       | PID_HIF1_TFPATHWAY     |
| 6:33287183  | HLA-DRB5     | PID_HIV_NEF_PATHWAY    |
| 17:43390763 | CRHR1_2      | PID_HIV_NEF_PATHWAY    |
| 14:38061742 | MIPOL1       | PID_HNF3A_PATHWAY      |
| 14:38061742 | MIPOL1       | PID_HNF3B_PATHWAY      |
| 17:41056283 | RETREG3      | PID_HNF3B_PATHWAY      |
| 4:114424939 | CAMK2D       | PID_IFNG_PATHWAY       |
| 4:114494052 | CAMK2D       | PID_IFNG_PATHWAY       |
| 4:114529492 | CAMK2D       | PID_IFNG_PATHWAY       |
| 4:114539964 | CAMK2D       | PID_IFNG_PATHWAY       |
| 4:114597918 | CAMK2D       | PID_IFNG_PATHWAY       |
| 2:102720323 | MAP4K4       | PID_IL12_2PATHWAY      |
| 2:102783052 | MAP4K4       | PID_IL12_2PATHWAY      |
| 2:103047986 | MAP4K4       | PID_IL12_2PATHWAY      |
| 2:103063855 | MAP4K4       | PID_IL12_2PATHWAY      |
| 2:103066346 | MAP4K4       | PID_IL12_2PATHWAY      |
| 19:2477820  | SPPL2B       | PID_IL12_2PATHWAY      |
| 2:103047986 | MAP4K4       | PID_IL12_STAT4_PATHWAY |
| 2:103063855 | MAP4K4       | PID_IL12_STAT4_PATHWAY |
| 2:103066346 | MAP4K4       | PID_IL12_STAT4_PATHWAY |
| 2:102612026 | MAP4K4       | PID_IL1_PATHWAY        |
| 2:102621855 | MAP4K4       | PID_IL1_PATHWAY        |
| 2:102631503 | MAP4K4       | PID_IL1_PATHWAY        |
| 2:102633387 | MAP4K4       | PID_IL1_PATHWAY        |
| 2:102720323 | MAP4K4       | PID_IL1_PATHWAY        |
| 2:102783052 | MAP4K4       | PID_IL1_PATHWAY        |
| 3:49406095  | IP6K2        | PID_IL2_1PATHWAY       |
| 3:49424231  | IP6K2        | PID_IL2_1PATHWAY       |
| 3:49450137  | IP6K2        | PID_IL2_1PATHWAY       |
| 6:112137847 | FYN          | PID_IL2_1PATHWAY       |
| 6:112151452 | FYN          | PID_IL2_1PATHWAY       |
| 6:112175069 | FYN          | PID_IL2_1PATHWAY       |
| 17:40392358 | RETREG3      | PID_IL2_1PATHWAY       |
| 2:103047986 | MAP4K4       | PID_IL23_PATHWAY       |
| 2:103063855 | MAP4K4       | PID_IL23_PATHWAY       |
| 2:103066346 | MAP4K4       | PID_IL23_PATHWAY       |
| 4:76924571  | FAM47E-STBD1 | PID_IL23_PATHWAY       |
| 17:7983799  | V1NB1        | PID_IL23_PATHWAY       |
| 17:40392358 | RETREG3      | PID_IL2_STAT5_PATHWAY  |
| 17:40392358 | RETREG3      | PID_IL3_PATHWAY        |
| 17:40392358 | RETREG3      | PID_IL4_2PATHWAY       |

|              |                 |                           |
|--------------|-----------------|---------------------------|
| 17:40392358  | <i>RETREG3</i>  | PID_IL5_PATHWAY           |
| 19:3142784   | <i>SPPL2B</i>   | PID_IL8_CXCR1_PATHWAY     |
| 19:3147326   | <i>SPPL2B</i>   | PID_IL8_CXCR1_PATHWAY     |
| 5:133558885  | <i>C5orf24</i>  | PID_IL8_CXCR2_PATHWAY     |
| 19:3142784   | <i>SPPL2B</i>   | PID_IL8_CXCR2_PATHWAY     |
| 19:3147326   | <i>SPPL2B</i>   | PID_IL8_CXCR2_PATHWAY     |
| 1:226568665  | <i>ITPKB</i>    | PID_ILK_PATHWAY           |
| 3:49162284   | <i>IP6K2</i>    | PID_INTEGRIN1_PATHWAY     |
| 3:49162583   | <i>IP6K2</i>    | PID_INTEGRIN1_PATHWAY     |
| 6:33153528   | <i>HLA-DRB5</i> | PID_INTEGRIN1_PATHWAY     |
| 6:112494762  | <i>FYN</i>      | PID_INTEGRIN1_PATHWAY     |
| 6:112531401  | <i>FYN</i>      | PID_INTEGRIN1_PATHWAY     |
| 6:112561154  | <i>FYN</i>      | PID_INTEGRIN1_PATHWAY     |
| 6:112561430  | <i>FYN</i>      | PID_INTEGRIN1_PATHWAY     |
| 10:15562608  | <i>ITGA8</i>    | PID_INTEGRIN1_PATHWAY     |
| 10:15569598  | <i>ITGA8</i>    | PID_INTEGRIN1_PATHWAY     |
| 10:15652368  | <i>ITGA8</i>    | PID_INTEGRIN1_PATHWAY     |
| 11:133947732 | <i>IGSF9B</i>   | PID_INTEGRIN2_PATHWAY     |
| 16:30510571  | <i>SETD1A</i>   | PID_INTEGRIN2_PATHWAY     |
| 16:30516492  | <i>SETD1A</i>   | PID_INTEGRIN2_PATHWAY     |
| 16:30520856  | <i>SETD1A</i>   | PID_INTEGRIN2_PATHWAY     |
| 16:31370452  | <i>SETD1A</i>   | PID_INTEGRIN2_PATHWAY     |
| 6:112494762  | <i>FYN</i>      | PID_INTEGRIN3_PATHWAY     |
| 6:112531401  | <i>FYN</i>      | PID_INTEGRIN3_PATHWAY     |
| 6:112561154  | <i>FYN</i>      | PID_INTEGRIN3_PATHWAY     |
| 6:112561430  | <i>FYN</i>      | PID_INTEGRIN3_PATHWAY     |
| 17:42454243  | <i>FAM171A2</i> | PID_INTEGRIN3_PATHWAY     |
| 3:49162284   | <i>IP6K2</i>    | PID_INTEGRIN4_PATHWAY     |
| 3:49162583   | <i>IP6K2</i>    | PID_INTEGRIN4_PATHWAY     |
| 1:155027082  | <i>GBAP1</i>    | PID_INTEGRIN_A9B1_PATHWAY |
| 1:155033317  | <i>GBAP1</i>    | PID_INTEGRIN_A9B1_PATHWAY |
| 10:15562608  | <i>ITGA8</i>    | PID_INTEGRIN_CS_PATHWAY   |
| 10:15569598  | <i>ITGA8</i>    | PID_INTEGRIN_CS_PATHWAY   |
| 10:15652368  | <i>ITGA8</i>    | PID_INTEGRIN_CS_PATHWAY   |
| 16:30510571  | <i>SETD1A</i>   | PID_INTEGRIN_CS_PATHWAY   |
| 16:30516492  | <i>SETD1A</i>   | PID_INTEGRIN_CS_PATHWAY   |
| 16:30520856  | <i>SETD1A</i>   | PID_INTEGRIN_CS_PATHWAY   |
| 16:31370452  | <i>SETD1A</i>   | PID_INTEGRIN_CS_PATHWAY   |
| 17:42454243  | <i>FAM171A2</i> | PID_INTEGRIN_CS_PATHWAY   |
| 3:49406095   | <i>IP6K2</i>    | PID_LIS1_PATHWAY          |
| 3:49424231   | <i>IP6K2</i>    | PID_LIS1_PATHWAY          |
| 3:49450137   | <i>IP6K2</i>    | PID_LIS1_PATHWAY          |
| 12:122816734 | <i>HIP1R</i>    | PID_LIS1_PATHWAY          |
| 12:122817580 | <i>HIP1R</i>    | PID_LIS1_PATHWAY          |
| 12:122853197 | <i>HIP1R</i>    | PID_LIS1_PATHWAY          |
| 1:227067656  | <i>ITPKB</i>    | PID_LKB1_PATHWAY          |
| 17:7578671   | <i>V1NB1</i>    | PID_LKB1_PATHWAY          |
| 17:43999203  | <i>WNT3</i>     | PID_LKB1_PATHWAY          |
| 17:44005297  | <i>WNT3</i>     | PID_LKB1_PATHWAY          |
| 17:44019712  | <i>WNT3</i>     | PID_LKB1_PATHWAY          |
| 17:44060492  | <i>WNT3</i>     | PID_LKB1_PATHWAY          |
| 17:44065263  | <i>WNT3</i>     | PID_LKB1_PATHWAY          |
| 17:44081178  | <i>WNT3</i>     | PID_LKB1_PATHWAY          |

|              |          |                              |
|--------------|----------|------------------------------|
| 17:44083297  | WNT3     | PID_LKB1_PATHWAY             |
| 3:123089448  | KPNA1    | PID_LPA4_PATHWAY             |
| 8:131799767  | FAM49B   | PID_LPA4_PATHWAY             |
| 8:131845512  | FAM49B   | PID_LPA4_PATHWAY             |
| 8:131865425  | FAM49B   | PID_LPA4_PATHWAY             |
| 8:131901170  | FAM49B   | PID_LPA4_PATHWAY             |
| 16:50300511  | CASC16   | PID_LPA4_PATHWAY             |
| 16:50317039  | CASC16   | PID_LPA4_PATHWAY             |
| 3:49406095   | IP6K2    | PID_LYSOPHOSPHOLIPID_PATHWAY |
| 3:49424231   | IP6K2    | PID_LYSOPHOSPHOLIPID_PATHWAY |
| 3:49450137   | IP6K2    | PID_LYSOPHOSPHOLIPID_PATHWAY |
| 3:123089448  | KPNA1    | PID_LYSOPHOSPHOLIPID_PATHWAY |
| 8:131799767  | FAM49B   | PID_LYSOPHOSPHOLIPID_PATHWAY |
| 8:131845512  | FAM49B   | PID_LYSOPHOSPHOLIPID_PATHWAY |
| 8:131865425  | FAM49B   | PID_LYSOPHOSPHOLIPID_PATHWAY |
| 8:131901170  | FAM49B   | PID_LYSOPHOSPHOLIPID_PATHWAY |
| 16:50300511  | CASC16   | PID_LYSOPHOSPHOLIPID_PATHWAY |
| 16:50317039  | CASC16   | PID_LYSOPHOSPHOLIPID_PATHWAY |
| 17:43999203  | WNT3     | PID_LYSOPHOSPHOLIPID_PATHWAY |
| 17:44005297  | WNT3     | PID_LYSOPHOSPHOLIPID_PATHWAY |
| 17:44019712  | WNT3     | PID_LYSOPHOSPHOLIPID_PATHWAY |
| 17:44060492  | WNT3     | PID_LYSOPHOSPHOLIPID_PATHWAY |
| 17:44065263  | WNT3     | PID_LYSOPHOSPHOLIPID_PATHWAY |
| 17:44081178  | WNT3     | PID_LYSOPHOSPHOLIPID_PATHWAY |
| 17:44083297  | WNT3     | PID_LYSOPHOSPHOLIPID_PATHWAY |
| 19:3142784   | SPPL2B   | PID_LYSOPHOSPHOLIPID_PATHWAY |
| 19:3147326   | SPPL2B   | PID_LYSOPHOSPHOLIPID_PATHWAY |
| 18:40409806  | RIT2     | PID_MAPK_TRK_PATHWAY         |
| 18:40494893  | RIT2     | PID_MAPK_TRK_PATHWAY         |
| 18:40543738  | RIT2     | PID_MAPK_TRK_PATHWAY         |
| 18:40612823  | RIT2     | PID_MAPK_TRK_PATHWAY         |
| 18:40649778  | RIT2     | PID_MAPK_TRK_PATHWAY         |
| 18:40671720  | RIT2     | PID_MAPK_TRK_PATHWAY         |
| 18:40673380  | RIT2     | PID_MAPK_TRK_PATHWAY         |
| 3:49406095   | IP6K2    | PID_MET_PATHWAY              |
| 3:49424231   | IP6K2    | PID_MET_PATHWAY              |
| 3:49450137   | IP6K2    | PID_MET_PATHWAY              |
| 9:17579690   | SH3GL2_2 | PID_MET_PATHWAY              |
| 9:17587160   | SH3GL2_2 | PID_MET_PATHWAY              |
| 9:17609302   | SH3GL2_2 | PID_MET_PATHWAY              |
| 9:17626762   | SH3GL2_2 | PID_MET_PATHWAY              |
| 9:17627444   | SH3GL2_2 | PID_MET_PATHWAY              |
| 9:17642664   | SH3GL2_2 | PID_MET_PATHWAY              |
| 9:17710876   | SH3GL2_2 | PID_MET_PATHWAY              |
| 9:17732590   | SH3GL2_2 | PID_MET_PATHWAY              |
| 9:17737514   | SH3GL2_2 | PID_MET_PATHWAY              |
| 9:17758945   | SH3GL2_2 | PID_MET_PATHWAY              |
| 3:49406095   | IP6K2    | PID_MTOR_4PATHWAY            |
| 3:49424231   | IP6K2    | PID_MTOR_4PATHWAY            |
| 3:49450137   | IP6K2    | PID_MTOR_4PATHWAY            |
| 12:122816734 | HIP1R    | PID_MTOR_4PATHWAY            |
| 12:122817580 | HIP1R    | PID_MTOR_4PATHWAY            |
| 12:122853197 | HIP1R    | PID_MTOR_4PATHWAY            |

|             |          |                                       |
|-------------|----------|---------------------------------------|
| 17:7479140  | V1NB1    | PID_MTOR_4PATHWAY                     |
| 17:7480325  | V1NB1    | PID_MTOR_4PATHWAY                     |
| 3:48199695  | IP6K2    | PID_MYC_ACTIV_PATHWAY                 |
| 3:48214438  | IP6K2    | PID_MYC_ACTIV_PATHWAY                 |
| 5:60273923  | ELOVL7   | PID_MYC_ACTIV_PATHWAY                 |
| 5:60288288  | ELOVL7   | PID_MYC_ACTIV_PATHWAY                 |
| 8:22108784  | BIN3     | PID_MYC_ACTIV_PATHWAY                 |
| 17:7479140  | V1NB1    | PID_MYC_ACTIV_PATHWAY                 |
| 17:7480325  | V1NB1    | PID_MYC_ACTIV_PATHWAY                 |
| 17:7578671  | V1NB1    | PID_MYC_ACTIV_PATHWAY                 |
| 17:76177567 | DNAH17   | PID_MYC_ACTIV_PATHWAY                 |
| 5:133558885 | C5orf24  | PID_MYC_PATHWAY                       |
| 3:49406095  | IP6K2    | PID_NCADHERIN_PATHWAY                 |
| 3:49424231  | IP6K2    | PID_NCADHERIN_PATHWAY                 |
| 3:49450137  | IP6K2    | PID_NCADHERIN_PATHWAY                 |
| 17:39883520 | RETREG3  | PID_NCADHERIN_PATHWAY                 |
| 6:112137847 | FYN      | PID_NEPHRIN_NEPH1_PATHWAY             |
| 6:112151452 | FYN      | PID_NEPHRIN_NEPH1_PATHWAY             |
| 6:112175069 | FYN      | PID_NEPHRIN_NEPH1_PATHWAY             |
| 3:49406095  | IP6K2    | PID_NETRIN_PATHWAY                    |
| 3:49424231  | IP6K2    | PID_NETRIN_PATHWAY                    |
| 3:49450137  | IP6K2    | PID_NETRIN_PATHWAY                    |
| 6:112137847 | FYN      | PID_NETRIN_PATHWAY                    |
| 6:112151452 | FYN      | PID_NETRIN_PATHWAY                    |
| 6:112175069 | FYN      | PID_NETRIN_PATHWAY                    |
| 16:50730088 | CASC16   | PID_NFKAPPAB_CANONICAL_PATHWAY        |
| 16:50730446 | CASC16   | PID_NFKAPPAB_CANONICAL_PATHWAY        |
| 16:50745926 | CASC16   | PID_NFKAPPAB_CANONICAL_PATHWAY        |
| 16:50790891 | CASC16   | PID_NFKAPPAB_CANONICAL_PATHWAY        |
| 6:32179319  | HLA-DRB5 | PID_NOTCH_PATHWAY                     |
| 6:32186193  | HLA-DRB5 | PID_NOTCH_PATHWAY                     |
| 12:41144387 | LRRK2_2  | PID_NOTCH_PATHWAY                     |
| 12:41147295 | LRRK2_2  | PID_NOTCH_PATHWAY                     |
| 12:41195135 | LRRK2_2  | PID_NOTCH_PATHWAY                     |
| 12:41251554 | LRRK2_2  | PID_NOTCH_PATHWAY                     |
| 12:41255129 | LRRK2_2  | PID_NOTCH_PATHWAY                     |
| 12:41297969 | LRRK2_2  | PID_NOTCH_PATHWAY                     |
| 12:41407403 | LRRK2_2  | PID_NOTCH_PATHWAY                     |
| 1:161875645 | FCGR2A   | PID_P38_ALPHA_BETA_DOWNSTREAM_PATHWAY |
| 1:161930954 | FCGR2A   | PID_P38_ALPHA_BETA_DOWNSTREAM_PATHWAY |
| 17:7578671  | V1NB1    | PID_P38_ALPHA_BETA_DOWNSTREAM_PATHWAY |
| 6:112137847 | FYN      | PID_P38_ALPHA_BETA_PATHWAY            |
| 6:112151452 | FYN      | PID_P38_ALPHA_BETA_PATHWAY            |
| 6:112175069 | FYN      | PID_P38_ALPHA_BETA_PATHWAY            |
| 8:11353586  | CTSB     | PID_P38_ALPHA_BETA_PATHWAY            |
| 8:11363667  | CTSB     | PID_P38_ALPHA_BETA_PATHWAY            |
| 8:11381148  | CTSB     | PID_P38_ALPHA_BETA_PATHWAY            |
| 17:43999203 | WNT3     | PID_P38_GAMMA_DELTA_PATHWAY           |
| 17:44005297 | WNT3     | PID_P38_GAMMA_DELTA_PATHWAY           |
| 17:44019712 | WNT3     | PID_P38_GAMMA_DELTA_PATHWAY           |
| 17:44060492 | WNT3     | PID_P38_GAMMA_DELTA_PATHWAY           |
| 17:44065263 | WNT3     | PID_P38_GAMMA_DELTA_PATHWAY           |
| 17:44081178 | WNT3     | PID_P38_GAMMA_DELTA_PATHWAY           |

|             |              |                                  |
|-------------|--------------|----------------------------------|
| 17:44083297 | WNT3         | PID_P38_GAMMA_DELTA_PATHWAY      |
| 19:1611856  | SPPL2B       | PID_P38_MK2_PATHWAY              |
| 19:2477820  | SPPL2B       | PID_P38_MKK3_6PATHWAY            |
| 2:102357447 | MAP4K4       | PID_P53_DOWNSTREAM_PATHWAY       |
| 2:102379173 | MAP4K4       | PID_P53_DOWNSTREAM_PATHWAY       |
| 2:102413116 | MAP4K4       | PID_P53_DOWNSTREAM_PATHWAY       |
| 4:76407998  | FAM47E-STBD1 | PID_P53_DOWNSTREAM_PATHWAY       |
| 8:22974278  | BIN3         | PID_P53_DOWNSTREAM_PATHWAY       |
| 8:23050400  | BIN3         | PID_P53_DOWNSTREAM_PATHWAY       |
| 14:38061742 | MIPOL1       | PID_P53_DOWNSTREAM_PATHWAY       |
| 17:7578671  | V1NB1        | PID_P53_DOWNSTREAM_PATHWAY       |
| 4:76407998  | FAM47E-STBD1 | PID_P53_REGULATION_PATHWAY       |
| 5:133558885 | C5orf24      | PID_P53_REGULATION_PATHWAY       |
| 6:33287183  | HLA-DRB5     | PID_P53_REGULATION_PATHWAY       |
| 17:7578671  | V1NB1        | PID_P53_REGULATION_PATHWAY       |
| 1:161171736 | FCGR2A       | PID_P73PATHWAY                   |
| 4:76407998  | FAM47E-STBD1 | PID_P73PATHWAY                   |
| 3:49406095  | IP6K2        | PID_P75_NTR_PATHWAY              |
| 3:49424231  | IP6K2        | PID_P75_NTR_PATHWAY              |
| 3:49450137  | IP6K2        | PID_P75_NTR_PATHWAY              |
| 17:7578671  | V1NB1        | PID_P75_NTR_PATHWAY              |
| 3:49406095  | IP6K2        | PID_PDGFRL_PATHWAY               |
| 3:49424231  | IP6K2        | PID_PDGFRL_PATHWAY               |
| 3:49450137  | IP6K2        | PID_PDGFRL_PATHWAY               |
| 5:133558885 | C5orf24      | PID_PDGFRL_PATHWAY               |
| 6:112137847 | FYN          | PID_PDGFRL_PATHWAY               |
| 6:112151452 | FYN          | PID_PDGFRL_PATHWAY               |
| 6:112175069 | FYN          | PID_PDGFRL_PATHWAY               |
| 8:11353586  | CTSB         | PID_PDGFRL_PATHWAY               |
| 8:11363667  | CTSB         | PID_PDGFRL_PATHWAY               |
| 8:11381148  | CTSB         | PID_PDGFRL_PATHWAY               |
| 17:40392358 | RETREG3      | PID_PDGFRL_PATHWAY               |
| 3:122200170 | KPNA1        | PID_PI3KCI_AKT_PATHWAY           |
| 3:49406095  | IP6K2        | PID_PI3KCI_PATHWAY               |
| 3:49424231  | IP6K2        | PID_PI3KCI_PATHWAY               |
| 3:49450137  | IP6K2        | PID_PI3KCI_PATHWAY               |
| 6:112137847 | FYN          | PID_PI3KCI_PATHWAY               |
| 6:112151452 | FYN          | PID_PI3KCI_PATHWAY               |
| 6:112175069 | FYN          | PID_PI3KCI_PATHWAY               |
| 8:11353586  | CTSB         | PID_PI3KCI_PATHWAY               |
| 8:11363667  | CTSB         | PID_PI3KCI_PATHWAY               |
| 8:11381148  | CTSB         | PID_PI3KCI_PATHWAY               |
| 17:76727455 | DNAH17       | PID_PI3KCI_PATHWAY               |
| 3:49406095  | IP6K2        | PID_PLK1_PATHWAY                 |
| 3:49424231  | IP6K2        | PID_PLK1_PATHWAY                 |
| 3:49450137  | IP6K2        | PID_PLK1_PATHWAY                 |
| 5:133558885 | C5orf24      | PID_PLK1_PATHWAY                 |
| 3:49406095  | IP6K2        | PID_PRL_SIGNALING_EVENTS_PATHWAY |
| 3:49424231  | IP6K2        | PID_PRL_SIGNALING_EVENTS_PATHWAY |
| 3:49450137  | IP6K2        | PID_PRL_SIGNALING_EVENTS_PATHWAY |
| 16:50612930 | CASC16       | PID_PS1_PATHWAY                  |
| 16:50643086 | CASC16       | PID_PS1_PATHWAY                  |
| 3:49406095  | IP6K2        | PID_PTP1B_PATHWAY                |

|             |                 |                      |
|-------------|-----------------|----------------------|
| 3:49424231  | <i>IP6K2</i>    | PID_PTP1B_PATHWAY    |
| 3:49450137  | <i>IP6K2</i>    | PID_PTP1B_PATHWAY    |
| 6:112137847 | <i>FYN</i>      | PID_PTP1B_PATHWAY    |
| 6:112151452 | <i>FYN</i>      | PID_PTP1B_PATHWAY    |
| 6:112175069 | <i>FYN</i>      | PID_PTP1B_PATHWAY    |
| 8:11353586  | <i>CTSB</i>     | PID_PTP1B_PATHWAY    |
| 8:11363667  | <i>CTSB</i>     | PID_PTP1B_PATHWAY    |
| 8:11381148  | <i>CTSB</i>     | PID_PTP1B_PATHWAY    |
| 17:40392358 | <i>RETREG3</i>  | PID_PTP1B_PATHWAY    |
| 17:42454243 | <i>FAM171A2</i> | PID_PTP1B_PATHWAY    |
| 1:155975202 | <i>GBAP1</i>    | PID_RAC1_REG_PATHWAY |
| 5:133558885 | <i>C5orf24</i>  | PID_RB_1PATHWAY      |
| 6:32941506  | <i>HLA-DRB5</i> | PID_RB_1PATHWAY      |
| 1:155975202 | <i>GBAP1</i>    | PID_REELIN_PATHWAY   |
| 6:112137847 | <i>FYN</i>      | PID_REELIN_PATHWAY   |
| 6:112151452 | <i>FYN</i>      | PID_REELIN_PATHWAY   |
| 6:112175069 | <i>FYN</i>      | PID_REELIN_PATHWAY   |
| 17:43999203 | <i>WNT3</i>     | PID_REELIN_PATHWAY   |
| 17:44005297 | <i>WNT3</i>     | PID_REELIN_PATHWAY   |
| 17:44019712 | <i>WNT3</i>     | PID_REELIN_PATHWAY   |
| 17:44060492 | <i>WNT3</i>     | PID_REELIN_PATHWAY   |
| 17:44065263 | <i>WNT3</i>     | PID_REELIN_PATHWAY   |
| 17:44081178 | <i>WNT3</i>     | PID_REELIN_PATHWAY   |
| 17:44083297 | <i>WNT3</i>     | PID_REELIN_PATHWAY   |
| 17:7578671  | <i>V1NB1</i>    | PID_REG_GR_PATHWAY   |
| 17:40392358 | <i>RETREG3</i>  | PID_REG_GR_PATHWAY   |
| 3:49406095  | <i>IP6K2</i>    | PID_RET_PATHWAY      |
| 3:49424231  | <i>IP6K2</i>    | PID_RET_PATHWAY      |
| 3:49450137  | <i>IP6K2</i>    | PID_RET_PATHWAY      |
| 3:49406095  | <i>IP6K2</i>    | PID_RHOA_PATHWAY     |
| 3:49424231  | <i>IP6K2</i>    | PID_RHOA_PATHWAY     |
| 3:49450137  | <i>IP6K2</i>    | PID_RHOA_PATHWAY     |
| 9:17579690  | <i>SH3GL2_2</i> | PID_RHOA_PATHWAY     |
| 9:17587160  | <i>SH3GL2_2</i> | PID_RHOA_PATHWAY     |
| 9:17609302  | <i>SH3GL2_2</i> | PID_RHOA_PATHWAY     |
| 9:17626762  | <i>SH3GL2_2</i> | PID_RHOA_PATHWAY     |
| 9:17627444  | <i>SH3GL2_2</i> | PID_RHOA_PATHWAY     |
| 9:17642664  | <i>SH3GL2_2</i> | PID_RHOA_PATHWAY     |
| 9:17710876  | <i>SH3GL2_2</i> | PID_RHOA_PATHWAY     |
| 9:17732590  | <i>SH3GL2_2</i> | PID_RHOA_PATHWAY     |
| 9:17737514  | <i>SH3GL2_2</i> | PID_RHOA_PATHWAY     |
| 9:17758945  | <i>SH3GL2_2</i> | PID_RHOA_PATHWAY     |
| 1:155975202 | <i>GBAP1</i>    | PID_RHOA_REG_PATHWAY |
| 3:49406095  | <i>IP6K2</i>    | PID_RHOA_REG_PATHWAY |
| 3:49424231  | <i>IP6K2</i>    | PID_RHOA_REG_PATHWAY |
| 3:49450137  | <i>IP6K2</i>    | PID_RHOA_REG_PATHWAY |
| 19:3142784  | <i>SPPL2B</i>   | PID_S1P_META_PATHWAY |
| 19:3147326  | <i>SPPL2B</i>   | PID_S1P_META_PATHWAY |
| 3:49406095  | <i>IP6K2</i>    | PID_S1P_S1P1_PATHWAY |
| 3:49424231  | <i>IP6K2</i>    | PID_S1P_S1P1_PATHWAY |
| 3:49450137  | <i>IP6K2</i>    | PID_S1P_S1P1_PATHWAY |
| 3:49406095  | <i>IP6K2</i>    | PID_S1P_S1P2_PATHWAY |
| 3:49424231  | <i>IP6K2</i>    | PID_S1P_S1P2_PATHWAY |

|             |                 |                            |
|-------------|-----------------|----------------------------|
| 3:49450137  | <i>IP6K2</i>    | PID_S1P_S1P2_PATHWAY       |
| 19:3142784  | <i>SPPL2B</i>   | PID_S1P_S1P2_PATHWAY       |
| 19:3147326  | <i>SPPL2B</i>   | PID_S1P_S1P2_PATHWAY       |
| 3:49406095  | <i>IP6K2</i>    | PID_S1P_S1P3_PATHWAY       |
| 3:49424231  | <i>IP6K2</i>    | PID_S1P_S1P3_PATHWAY       |
| 3:49450137  | <i>IP6K2</i>    | PID_S1P_S1P3_PATHWAY       |
| 19:3142784  | <i>SPPL2B</i>   | PID_S1P_S1P3_PATHWAY       |
| 19:3147326  | <i>SPPL2B</i>   | PID_S1P_S1P3_PATHWAY       |
| 3:49406095  | <i>IP6K2</i>    | PID_S1P_S1P4_PATHWAY       |
| 3:49424231  | <i>IP6K2</i>    | PID_S1P_S1P4_PATHWAY       |
| 3:49450137  | <i>IP6K2</i>    | PID_S1P_S1P4_PATHWAY       |
| 3:49406095  | <i>IP6K2</i>    | PID_SHP2_PATHWAY           |
| 3:49424231  | <i>IP6K2</i>    | PID_SHP2_PATHWAY           |
| 3:49450137  | <i>IP6K2</i>    | PID_SHP2_PATHWAY           |
| 19:1611856  | <i>SPPL2B</i>   | PID_SMAD2_3NUCLEAR_PATHWAY |
| 6:33153528  | <i>HLA-DRB5</i> | PID_SYNDECAN_1_PATHWAY     |
| 3:49406095  | <i>IP6K2</i>    | PID_SYNDECAN_2_PATHWAY     |
| 3:49424231  | <i>IP6K2</i>    | PID_SYNDECAN_2_PATHWAY     |
| 3:49450137  | <i>IP6K2</i>    | PID_SYNDECAN_2_PATHWAY     |
| 6:112137847 | <i>FYN</i>      | PID_SYNDECAN_3_PATHWAY     |
| 6:112151452 | <i>FYN</i>      | PID_SYNDECAN_3_PATHWAY     |
| 6:112175069 | <i>FYN</i>      | PID_SYNDECAN_3_PATHWAY     |
| 3:49406095  | <i>IP6K2</i>    | PID_SYNDECAN_4_PATHWAY     |
| 3:49424231  | <i>IP6K2</i>    | PID_SYNDECAN_4_PATHWAY     |
| 3:49450137  | <i>IP6K2</i>    | PID_SYNDECAN_4_PATHWAY     |
| 17:40392358 | <i>RETREG3</i>  | PID_TCPTP_PATHWAY          |
| 2:168897564 | <i>STK39</i>    | PID_TCR_PATHWAY            |
| 2:168919016 | <i>STK39</i>    | PID_TCR_PATHWAY            |
| 2:168931636 | <i>STK39</i>    | PID_TCR_PATHWAY            |
| 2:168979290 | <i>STK39</i>    | PID_TCR_PATHWAY            |
| 2:169016304 | <i>STK39</i>    | PID_TCR_PATHWAY            |
| 2:169057162 | <i>STK39</i>    | PID_TCR_PATHWAY            |
| 6:112137847 | <i>FYN</i>      | PID_TCR_PATHWAY            |
| 6:112151452 | <i>FYN</i>      | PID_TCR_PATHWAY            |
| 6:112175069 | <i>FYN</i>      | PID_TCR_PATHWAY            |
| 17:43390763 | <i>CRHR1_2</i>  | PID_TCR_PATHWAY            |
| 3:49406095  | <i>IP6K2</i>    | PID_TGFBR_PATHWAY          |
| 3:49424231  | <i>IP6K2</i>    | PID_TGFBR_PATHWAY          |
| 3:49450137  | <i>IP6K2</i>    | PID_TGFBR_PATHWAY          |
| 3:150298317 | <i>MED12L</i>   | PID_TGFBR_PATHWAY          |
| 5:133558885 | <i>C5orf24</i>  | PID_TGFBR_PATHWAY          |
| 6:33287183  | <i>HLA-DRB5</i> | PID_TGFBR_PATHWAY          |
| 3:49406095  | <i>IP6K2</i>    | PID_THROMBIN_PAR1_PATHWAY  |
| 3:49424231  | <i>IP6K2</i>    | PID_THROMBIN_PAR1_PATHWAY  |
| 3:49450137  | <i>IP6K2</i>    | PID_THROMBIN_PAR1_PATHWAY  |
| 19:3142784  | <i>SPPL2B</i>   | PID_THROMBIN_PAR1_PATHWAY  |
| 19:3147326  | <i>SPPL2B</i>   | PID_THROMBIN_PAR1_PATHWAY  |
| 3:49406095  | <i>IP6K2</i>    | PID_THROMBIN_PAR4_PATHWAY  |
| 3:49424231  | <i>IP6K2</i>    | PID_THROMBIN_PAR4_PATHWAY  |
| 3:49450137  | <i>IP6K2</i>    | PID_THROMBIN_PAR4_PATHWAY  |
| 19:3142784  | <i>SPPL2B</i>   | PID_THROMBIN_PAR4_PATHWAY  |
| 19:3147326  | <i>SPPL2B</i>   | PID_THROMBIN_PAR4_PATHWAY  |
| 2:102357447 | <i>MAP4K4</i>   | PID_TNF_PATHWAY            |

|              |        |                                            |
|--------------|--------|--------------------------------------------|
| 2:102379173  | MAP4K4 | PID_TNF_PATHWAY                            |
| 2:102413116  | MAP4K4 | PID_TNF_PATHWAY                            |
| 16:50790891  | CASC16 | PID_TNF_PATHWAY                            |
| 3:49406095   | IP6K2  | PID_TOLL_ENDOGENOUS_PATHWAY                |
| 3:49424231   | IP6K2  | PID_TOLL_ENDOGENOUS_PATHWAY                |
| 3:49450137   | IP6K2  | PID_TOLL_ENDOGENOUS_PATHWAY                |
| 1:155698425  | GBAP1  | PID_TRAIL_PATHWAY                          |
| 8:22974278   | BIN3   | PID_TRAIL_PATHWAY                          |
| 8:23050400   | BIN3   | PID_TRAIL_PATHWAY                          |
| 3:49406095   | IP6K2  | PID_TRKR_PATHWAY                           |
| 3:49424231   | IP6K2  | PID_TRKR_PATHWAY                           |
| 3:49450137   | IP6K2  | PID_TRKR_PATHWAY                           |
| 18:40409806  | RIT2   | PID_TRKR_PATHWAY                           |
| 18:40494893  | RIT2   | PID_TRKR_PATHWAY                           |
| 18:40543738  | RIT2   | PID_TRKR_PATHWAY                           |
| 18:40612823  | RIT2   | PID_TRKR_PATHWAY                           |
| 18:40649778  | RIT2   | PID_TRKR_PATHWAY                           |
| 18:40671720  | RIT2   | PID_TRKR_PATHWAY                           |
| 18:40673380  | RIT2   | PID_TRKR_PATHWAY                           |
| 3:49406095   | IP6K2  | PID_TXA2PATHWAY                            |
| 3:49424231   | IP6K2  | PID_TXA2PATHWAY                            |
| 3:49450137   | IP6K2  | PID_TXA2PATHWAY                            |
| 6:112137847  | FYN    | PID_TXA2PATHWAY                            |
| 6:112151452  | FYN    | PID_TXA2PATHWAY                            |
| 6:112175069  | FYN    | PID_TXA2PATHWAY                            |
| 8:11353586   | CTSB   | PID_TXA2PATHWAY                            |
| 8:11363667   | CTSB   | PID_TXA2PATHWAY                            |
| 8:11381148   | CTSB   | PID_TXA2PATHWAY                            |
| 19:3142784   | SPPL2B | PID_TXA2PATHWAY                            |
| 19:3147326   | SPPL2B | PID_TXA2PATHWAY                            |
| 3:49406095   | IP6K2  | PID_VEGFR1_2_PATHWAY                       |
| 3:49424231   | IP6K2  | PID_VEGFR1_2_PATHWAY                       |
| 3:49450137   | IP6K2  | PID_VEGFR1_2_PATHWAY                       |
| 6:112137847  | FYN    | PID_VEGFR1_2_PATHWAY                       |
| 6:112151452  | FYN    | PID_VEGFR1_2_PATHWAY                       |
| 6:112175069  | FYN    | PID_VEGFR1_2_PATHWAY                       |
| 17:7129974   | V1NB1  | PID_WNT_CANONICAL_PATHWAY                  |
| 3:49406095   | IP6K2  | PID_WNT_NONCANONICAL_PATHWAY               |
| 3:49424231   | IP6K2  | PID_WNT_NONCANONICAL_PATHWAY               |
| 3:49450137   | IP6K2  | PID_WNT_NONCANONICAL_PATHWAY               |
| 17:7129974   | V1NB1  | PID_WNT_NONCANONICAL_PATHWAY               |
| 17:44843651  | WNT3   | PID_WNT_SIGNALING_PATHWAY                  |
| 17:44870978  | WNT3   | PID_WNT_SIGNALING_PATHWAY                  |
| 17:44871422  | WNT3   | PID_WNT_SIGNALING_PATHWAY                  |
| 17:44888209  | WNT3   | PID_WNT_SIGNALING_PATHWAY                  |
| 17:44888715  | WNT3   | PID_WNT_SIGNALING_PATHWAY                  |
| 17:44906949  | WNT3   | PID_WNT_SIGNALING_PATHWAY                  |
| 10:104847713 | GBF1   | REACTOME_ABACAVIR_METABOLISM               |
| 10:104861736 | GBF1   | REACTOME_ABACAVIR_METABOLISM               |
| 10:104926485 | GBF1   | REACTOME_ABACAVIR_METABOLISM               |
| 10:104929716 | GBF1   | REACTOME_ABACAVIR_METABOLISM               |
| 10:104847713 | GBF1   | REACTOME_ABACAVIR_TRANSPORT_AND_METABOLISM |
| 10:104861736 | GBF1   | REACTOME_ABACAVIR_TRANSPORT_AND_METABOLISM |

|              |                 |                                                                                       |
|--------------|-----------------|---------------------------------------------------------------------------------------|
| 10:104926485 | <i>GBF1</i>     | REACTOME_ABACAVIR_TRANSPORT_AND_METABOLISM                                            |
| 10:104929716 | <i>GBF1</i>     | REACTOME_ABACAVIR_TRANSPORT_AND_METABOLISM                                            |
| 6:32151443   | <i>HLA-DRB5</i> | REACTOME_ABC_FAMILY_PROTEINS_MEDIATED_TRANSPORT                                       |
| 12:39960237  | <i>LRRK2_2</i>  | REACTOME_ABC_FAMILY_PROTEINS_MEDIATED_TRANSPORT                                       |
| 12:123453034 | <i>HIP1R</i>    | REACTOME_ABC_FAMILY_PROTEINS_MEDIATED_TRANSPORT                                       |
| 6:32151443   | <i>HLA-DRB5</i> | REACTOME_ABC_TRANSPORTER_DISORDERS                                                    |
| 14:74764925  | <i>RPS6KL1</i>  | REACTOME_ABC_TRANSPORTER_DISORDERS                                                    |
| 12:39960237  | <i>LRRK2_2</i>  | REACTOME_ABC_TRANSPORTERS_IN_LIPID_HOMEOSTASIS                                        |
| 6:31925679   | <i>HLA-DRB5</i> | REACTOME_ABORTIVE_ELONGATION_OF_HIV_1_TRANSCRIPT_IN_THE_ABSENCE_OF_TAT                |
| 6:72646790   | <i>RIMS1</i>    | REACTOME_ACETYLCHOLINE_NEUROTRANSMITTER_RELEASE_CYCLE                                 |
| 6:72648340   | <i>RIMS1</i>    | REACTOME_ACETYLCHOLINE_NEUROTRANSMITTER_RELEASE_CYCLE                                 |
| 6:72686444   | <i>RIMS1</i>    | REACTOME_ACETYLCHOLINE_NEUROTRANSMITTER_RELEASE_CYCLE                                 |
| 6:72716358   | <i>RIMS1</i>    | REACTOME_ACETYLCHOLINE_NEUROTRANSMITTER_RELEASE_CYCLE                                 |
| 6:72904599   | <i>RIMS1</i>    | REACTOME_ACETYLCHOLINE_NEUROTRANSMITTER_RELEASE_CYCLE                                 |
| 6:72913435   | <i>RIMS1</i>    | REACTOME_ACETYLCHOLINE_NEUROTRANSMITTER_RELEASE_CYCLE                                 |
| 6:72930929   | <i>RIMS1</i>    | REACTOME_ACETYLCHOLINE_NEUROTRANSMITTER_RELEASE_CYCLE                                 |
| 6:72982289   | <i>RIMS1</i>    | REACTOME_ACETYLCHOLINE_NEUROTRANSMITTER_RELEASE_CYCLE                                 |
| 6:72986711   | <i>RIMS1</i>    | REACTOME_ACETYLCHOLINE_NEUROTRANSMITTER_RELEASE_CYCLE                                 |
| 6:73008061   | <i>RIMS1</i>    | REACTOME_ACETYLCHOLINE_NEUROTRANSMITTER_RELEASE_CYCLE                                 |
| 6:73060492   | <i>RIMS1</i>    | REACTOME_ACETYLCHOLINE_NEUROTRANSMITTER_RELEASE_CYCLE                                 |
| 19:3142784   | <i>SPPL2B</i>   | REACTOME_ACETYLCHOLINE_REGULATES_INSULIN_SECRETION                                    |
| 19:3147326   | <i>SPPL2B</i>   | REACTOME_ACETYLCHOLINE_REGULATES_INSULIN_SECRETION                                    |
| 1:227067656  | <i>ITPKB</i>    | REACTOME_ACTIVATED_NOTCH1_TRANSMITS_SIGNAL_TO_THE_NUCLEUS                             |
| 12:41144387  | <i>LRRK2_2</i>  | REACTOME_ACTIVATED_NOTCH1_TRANSMITS_SIGNAL_TO_THE_NUCLEUS                             |
| 12:41147295  | <i>LRRK2_2</i>  | REACTOME_ACTIVATED_NOTCH1_TRANSMITS_SIGNAL_TO_THE_NUCLEUS                             |
| 12:41195135  | <i>LRRK2_2</i>  | REACTOME_ACTIVATED_NOTCH1_TRANSMITS_SIGNAL_TO_THE_NUCLEUS                             |
| 12:41251554  | <i>LRRK2_2</i>  | REACTOME_ACTIVATED_NOTCH1_TRANSMITS_SIGNAL_TO_THE_NUCLEUS                             |
| 12:41255129  | <i>LRRK2_2</i>  | REACTOME_ACTIVATED_NOTCH1_TRANSMITS_SIGNAL_TO_THE_NUCLEUS                             |
| 12:41297969  | <i>LRRK2_2</i>  | REACTOME_ACTIVATED_NOTCH1_TRANSMITS_SIGNAL_TO_THE_NUCLEUS                             |
| 12:41407403  | <i>LRRK2_2</i>  | REACTOME_ACTIVATED_NOTCH1_TRANSMITS_SIGNAL_TO_THE_NUCLEUS                             |
| 6:112137847  | <i>FYN</i>      | REACTOME_ACTIVATED_NTRK2_SIGNALS_THROUGH_FYN                                          |
| 6:112151452  | <i>FYN</i>      | REACTOME_ACTIVATED_NTRK2_SIGNALS_THROUGH_FYN                                          |
| 6:112175069  | <i>FYN</i>      | REACTOME_ACTIVATED_NTRK2_SIGNALS_THROUGH_FYN                                          |
| 16:50730088  | <i>CASC16</i>   | REACTOME_ACTIVATED_TAK1_MEDIATES_P38_MAPK_ACTIVATION                                  |
| 16:50730446  | <i>CASC16</i>   | REACTOME_ACTIVATED_TAK1_MEDIATES_P38_MAPK_ACTIVATION                                  |
| 16:50745926  | <i>CASC16</i>   | REACTOME_ACTIVATED_TAK1_MEDIATES_P38_MAPK_ACTIVATION                                  |
| 17:43999203  | <i>WNT3</i>     | REACTOME_ACTIVATION_OF_AMPK_DOWNSTREAM_OF_NMDARS                                      |
| 17:44005297  | <i>WNT3</i>     | REACTOME_ACTIVATION_OF_AMPK_DOWNSTREAM_OF_NMDARS                                      |
| 17:44019712  | <i>WNT3</i>     | REACTOME_ACTIVATION_OF_AMPK_DOWNSTREAM_OF_NMDARS                                      |
| 17:44060492  | <i>WNT3</i>     | REACTOME_ACTIVATION_OF_AMPK_DOWNSTREAM_OF_NMDARS                                      |
| 17:44065263  | <i>WNT3</i>     | REACTOME_ACTIVATION_OF_AMPK_DOWNSTREAM_OF_NMDARS                                      |
| 17:44081178  | <i>WNT3</i>     | REACTOME_ACTIVATION_OF_AMPK_DOWNSTREAM_OF_NMDARS                                      |
| 17:44083297  | <i>WNT3</i>     | REACTOME_ACTIVATION_OF_AMPK_DOWNSTREAM_OF_NMDARS                                      |
| 17:45215865  | <i>WNT3</i>     | REACTOME_ACTIVATION_OF_APC_C_AND_APC_C:CDC20_MEDIATED_DEGRADATION_OF_MITOTIC_PROTEINS |
| 17:45244822  | <i>WNT3</i>     | REACTOME_ACTIVATION_OF_APC_C_AND_APC_C:CDC20_MEDIATED_DEGRADATION_OF_MITOTIC_PROTEINS |
| 3:48199695   | <i>IP6K2</i>    | REACTOME_ACTIVATION_OF_ATR_IN_RESPONSE_TO_REPLICATION_STRESS                          |
| 3:48214438   | <i>IP6K2</i>    | REACTOME_ACTIVATION_OF_ATR_IN_RESPONSE_TO_REPLICATION_STRESS                          |
| 20:5934513   | <i>CRLS1</i>    | REACTOME_ACTIVATION_OF_ATR_IN_RESPONSE_TO_REPLICATION_STRESS                          |
| 20:5935522   | <i>CRLS1</i>    | REACTOME_ACTIVATION_OF_ATR_IN_RESPONSE_TO_REPLICATION_STRESS                          |
| 20:5968737   | <i>CRLS1</i>    | REACTOME_ACTIVATION_OF_ATR_IN_RESPONSE_TO_REPLICATION_STRESS                          |
| 20:5968964   | <i>CRLS1</i>    | REACTOME_ACTIVATION_OF_ATR_IN_RESPONSE_TO_REPLICATION_STRESS                          |
| 17:7578671   | <i>V1NB1</i>    | REACTOME_ACTIVATION_OF_BH3_ONLY_PROTEINS                                              |
| 6:31897219   | <i>HLA-DRB5</i> | REACTOME_ACTIVATION_OF_C3_AND_C5                                                      |

|              |               |                                                                                                         |
|--------------|---------------|---------------------------------------------------------------------------------------------------------|
| 8:11679472   | <i>CTSB</i>   | REACTOME_ACTIVATION_OF_GENE_EXPRESSION_BY_SREBF_SREBP                                                   |
| 17:7101771   | <i>V1NB1</i>  | REACTOME_ACTIVATION_OF_KAINATE_RECEPTORS_UPON_GLUTAMATE_BINDING                                         |
| 19:2557113   | <i>SPPL2B</i> | REACTOME_ACTIVATION_OF_KAINATE_RECEPTORS_UPON_GLUTAMATE_BINDING                                         |
| 19:2563327   | <i>SPPL2B</i> | REACTOME_ACTIVATION_OF_KAINATE_RECEPTORS_UPON_GLUTAMATE_BINDING                                         |
| 19:2580057   | <i>SPPL2B</i> | REACTOME_ACTIVATION_OF_KAINATE_RECEPTORS_UPON_GLUTAMATE_BINDING                                         |
| 19:2660983   | <i>SPPL2B</i> | REACTOME_ACTIVATION_OF_KAINATE_RECEPTORS_UPON_GLUTAMATE_BINDING                                         |
| 17:76869878  | <i>DNAH17</i> | REACTOME_ACTIVATION_OF_MATRIX_METALLOPROTEINASES                                                        |
| 10:103185542 | <i>GBF1</i>   | REACTOME_ACTIVATION_OF_NF_KAPPAB_IN_B_CELLS                                                             |
| 10:103305087 | <i>GBF1</i>   | REACTOME_ACTIVATION_OF_NF_KAPPAB_IN_B_CELLS                                                             |
| 10:103308244 | <i>GBF1</i>   | REACTOME_ACTIVATION_OF_NF_KAPPAB_IN_B_CELLS                                                             |
| 3:48835245   | <i>IP6K2</i>  | REACTOME_ACTIVATION_OF_NMDA_RECEPTORS_AND_POSTSYNAPTIC_EVENTS                                           |
| 4:114424939  | <i>CAMK2D</i> | REACTOME_ACTIVATION_OF_NMDA_RECEPTORS_AND_POSTSYNAPTIC_EVENTS                                           |
| 4:114494052  | <i>CAMK2D</i> | REACTOME_ACTIVATION_OF_NMDA_RECEPTORS_AND_POSTSYNAPTIC_EVENTS                                           |
| 4:114529492  | <i>CAMK2D</i> | REACTOME_ACTIVATION_OF_NMDA_RECEPTORS_AND_POSTSYNAPTIC_EVENTS                                           |
| 4:114539964  | <i>CAMK2D</i> | REACTOME_ACTIVATION_OF_NMDA_RECEPTORS_AND_POSTSYNAPTIC_EVENTS                                           |
| 4:114597918  | <i>CAMK2D</i> | REACTOME_ACTIVATION_OF_NMDA_RECEPTORS_AND_POSTSYNAPTIC_EVENTS                                           |
| 8:131799767  | <i>FAM49B</i> | REACTOME_ACTIVATION_OF_NMDA_RECEPTORS_AND_POSTSYNAPTIC_EVENTS                                           |
| 8:131845512  | <i>FAM49B</i> | REACTOME_ACTIVATION_OF_NMDA_RECEPTORS_AND_POSTSYNAPTIC_EVENTS                                           |
| 8:131865425  | <i>FAM49B</i> | REACTOME_ACTIVATION_OF_NMDA_RECEPTORS_AND_POSTSYNAPTIC_EVENTS                                           |
| 8:131901170  | <i>FAM49B</i> | REACTOME_ACTIVATION_OF_NMDA_RECEPTORS_AND_POSTSYNAPTIC_EVENTS                                           |
| 11:83219006  | <i>DLG2</i>   | REACTOME_ACTIVATION_OF_NMDA_RECEPTORS_AND_POSTSYNAPTIC_EVENTS                                           |
| 11:83232915  | <i>DLG2</i>   | REACTOME_ACTIVATION_OF_NMDA_RECEPTORS_AND_POSTSYNAPTIC_EVENTS                                           |
| 11:83282740  | <i>DLG2</i>   | REACTOME_ACTIVATION_OF_NMDA_RECEPTORS_AND_POSTSYNAPTIC_EVENTS                                           |
| 11:83387273  | <i>DLG2</i>   | REACTOME_ACTIVATION_OF_NMDA_RECEPTORS_AND_POSTSYNAPTIC_EVENTS                                           |
| 11:83538733  | <i>DLG2</i>   | REACTOME_ACTIVATION_OF_NMDA_RECEPTORS_AND_POSTSYNAPTIC_EVENTS                                           |
| 11:83544472  | <i>DLG2</i>   | REACTOME_ACTIVATION_OF_NMDA_RECEPTORS_AND_POSTSYNAPTIC_EVENTS                                           |
| 11:83578152  | <i>DLG2</i>   | REACTOME_ACTIVATION_OF_NMDA_RECEPTORS_AND_POSTSYNAPTIC_EVENTS                                           |
| 11:83647657  | <i>DLG2</i>   | REACTOME_ACTIVATION_OF_NMDA_RECEPTORS_AND_POSTSYNAPTIC_EVENTS                                           |
| 11:83669903  | <i>DLG2</i>   | REACTOME_ACTIVATION_OF_NMDA_RECEPTORS_AND_POSTSYNAPTIC_EVENTS                                           |
| 11:83736246  | <i>DLG2</i>   | REACTOME_ACTIVATION_OF_NMDA_RECEPTORS_AND_POSTSYNAPTIC_EVENTS                                           |
| 11:83762918  | <i>DLG2</i>   | REACTOME_ACTIVATION_OF_NMDA_RECEPTORS_AND_POSTSYNAPTIC_EVENTS                                           |
| 11:83823752  | <i>DLG2</i>   | REACTOME_ACTIVATION_OF_NMDA_RECEPTORS_AND_POSTSYNAPTIC_EVENTS                                           |
| 11:83839992  | <i>DLG2</i>   | REACTOME_ACTIVATION_OF_NMDA_RECEPTORS_AND_POSTSYNAPTIC_EVENTS                                           |
| 11:84104763  | <i>DLG2</i>   | REACTOME_ACTIVATION_OF_NMDA_RECEPTORS_AND_POSTSYNAPTIC_EVENTS                                           |
| 11:84169039  | <i>DLG2</i>   | REACTOME_ACTIVATION_OF_NMDA_RECEPTORS_AND_POSTSYNAPTIC_EVENTS                                           |
| 11:84221628  | <i>DLG2</i>   | REACTOME_ACTIVATION_OF_NMDA_RECEPTORS_AND_POSTSYNAPTIC_EVENTS                                           |
| 11:84312008  | <i>DLG2</i>   | REACTOME_ACTIVATION_OF_NMDA_RECEPTORS_AND_POSTSYNAPTIC_EVENTS                                           |
| 11:84324361  | <i>DLG2</i>   | REACTOME_ACTIVATION_OF_NMDA_RECEPTORS_AND_POSTSYNAPTIC_EVENTS                                           |
| 11:84360346  | <i>DLG2</i>   | REACTOME_ACTIVATION_OF_NMDA_RECEPTORS_AND_POSTSYNAPTIC_EVENTS                                           |
| 11:84403409  | <i>DLG2</i>   | REACTOME_ACTIVATION_OF_NMDA_RECEPTORS_AND_POSTSYNAPTIC_EVENTS                                           |
| 17:7101771   | <i>V1NB1</i>  | REACTOME_ACTIVATION_OF_NMDA_RECEPTORS_AND_POSTSYNAPTIC_EVENTS                                           |
| 17:43999203  | <i>WNT3</i>   | REACTOME_ACTIVATION_OF_NMDA_RECEPTORS_AND_POSTSYNAPTIC_EVENTS                                           |
| 17:44005297  | <i>WNT3</i>   | REACTOME_ACTIVATION_OF_NMDA_RECEPTORS_AND_POSTSYNAPTIC_EVENTS                                           |
| 17:44019712  | <i>WNT3</i>   | REACTOME_ACTIVATION_OF_NMDA_RECEPTORS_AND_POSTSYNAPTIC_EVENTS                                           |
| 17:44060492  | <i>WNT3</i>   | REACTOME_ACTIVATION_OF_NMDA_RECEPTORS_AND_POSTSYNAPTIC_EVENTS                                           |
| 17:44065263  | <i>WNT3</i>   | REACTOME_ACTIVATION_OF_NMDA_RECEPTORS_AND_POSTSYNAPTIC_EVENTS                                           |
| 17:44081178  | <i>WNT3</i>   | REACTOME_ACTIVATION_OF_NMDA_RECEPTORS_AND_POSTSYNAPTIC_EVENTS                                           |
| 17:44083297  | <i>WNT3</i>   | REACTOME_ACTIVATION_OF_NMDA_RECEPTORS_AND_POSTSYNAPTIC_EVENTS                                           |
| 17:7578671   | <i>V1NB1</i>  | REACTOME_ACTIVATION_OF_NOXA_AND_TRANSLOCATION_TO_MITOCHONDRIA                                           |
| 17:7578671   | <i>V1NB1</i>  | REACTOME_ACTIVATION_OF_PUMA_AND_TRANSLOCATION_TO_MITOCHONDRIA                                           |
| 17:7479140   | <i>V1NB1</i>  | REACTOME_ACTIVATION_OF_THE_MRNA_UPON_BINDING_OF_THE_CAP_BINDING_COMPLEX_AND_EIFS_AND_SUBSEQUENT_BINDING |
| 17:7480325   | <i>V1NB1</i>  | REACTOME_ACTIVATION_OF_THE_MRNA_UPON_BINDING_OF_THE_CAP_BINDING_COMPLEX_AND_EIFS_AND_SUBSEQUENT_BINDING |
| 12:133206648 | <i>FBRSL1</i> | REACTOME_ACTIVATION_OF_THE_PRE_REPLICATIVE_COMPLEX                                                      |

|              |                     |                                                    |
|--------------|---------------------|----------------------------------------------------|
| 12:133223685 | <i>FBRSL1</i>       | REACTOME_ACTIVATION_OF_THE_PRE_REPLICATIVE_COMPLEX |
| 20:5934513   | <i>CRLS1</i>        | REACTOME_ACTIVATION_OF_THE_PRE_REPLICATIVE_COMPLEX |
| 20:5935522   | <i>CRLS1</i>        | REACTOME_ACTIVATION_OF_THE_PRE_REPLICATIVE_COMPLEX |
| 20:5968737   | <i>CRLS1</i>        | REACTOME_ACTIVATION_OF_THE_PRE_REPLICATIVE_COMPLEX |
| 20:5968964   | <i>CRLS1</i>        | REACTOME_ACTIVATION_OF_THE_PRE_REPLICATIVE_COMPLEX |
| 20:6011934   | <i>CRLS1</i>        | REACTOME_ACYL_CHAIN_REMODELLING_OF_PG              |
| 1:171837985  | <i>VAMP4</i>        | REACTOME_ADAPTIVE_IMMUNE_SYSTEM                    |
| 1:171945488  | <i>VAMP4</i>        | REACTOME_ADAPTIVE_IMMUNE_SYSTEM                    |
| 1:172137119  | <i>VAMP4</i>        | REACTOME_ADAPTIVE_IMMUNE_SYSTEM                    |
| 1:172386261  | <i>VAMP4</i>        | REACTOME_ADAPTIVE_IMMUNE_SYSTEM                    |
| 3:49740895   | <i>IP6K2</i>        | REACTOME_ADAPTIVE_IMMUNE_SYSTEM                    |
| 3:121319489  | <i>KPNA1</i>        | REACTOME_ADAPTIVE_IMMUNE_SYSTEM                    |
| 3:121324643  | <i>KPNA1</i>        | REACTOME_ADAPTIVE_IMMUNE_SYSTEM                    |
| 3:121340955  | <i>KPNA1</i>        | REACTOME_ADAPTIVE_IMMUNE_SYSTEM                    |
| 3:122289921  | <i>KPNA1</i>        | REACTOME_ADAPTIVE_IMMUNE_SYSTEM                    |
| 4:15608677   | <i>BST1</i>         | REACTOME_ADAPTIVE_IMMUNE_SYSTEM                    |
| 4:15618898   | <i>BST1</i>         | REACTOME_ADAPTIVE_IMMUNE_SYSTEM                    |
| 4:76407998   | <i>FAM47E-STBD1</i> | REACTOME_ADAPTIVE_IMMUNE_SYSTEM                    |
| 4:170015977  | <i>CLCN3</i>        | REACTOME_ADAPTIVE_IMMUNE_SYSTEM                    |
| 4:170031333  | <i>CLCN3</i>        | REACTOME_ADAPTIVE_IMMUNE_SYSTEM                    |
| 4:170101917  | <i>CLCN3</i>        | REACTOME_ADAPTIVE_IMMUNE_SYSTEM                    |
| 4:170161031  | <i>CLCN3</i>        | REACTOME_ADAPTIVE_IMMUNE_SYSTEM                    |
| 5:133558885  | <i>C5orf24</i>      | REACTOME_ADAPTIVE_IMMUNE_SYSTEM                    |
| 5:133710339  | <i>C5orf24</i>      | REACTOME_ADAPTIVE_IMMUNE_SYSTEM                    |
| 6:29798642   | <i>TRIM40</i>       | REACTOME_ADAPTIVE_IMMUNE_SYSTEM                    |
| 6:32602372   | <i>HLA-DRB5</i>     | REACTOME_ADAPTIVE_IMMUNE_SYSTEM                    |
| 6:32789400   | <i>HLA-DRB5</i>     | REACTOME_ADAPTIVE_IMMUNE_SYSTEM                    |
| 6:32791831   | <i>HLA-DRB5</i>     | REACTOME_ADAPTIVE_IMMUNE_SYSTEM                    |
| 6:32797361   | <i>HLA-DRB5</i>     | REACTOME_ADAPTIVE_IMMUNE_SYSTEM                    |
| 6:32802462   | <i>HLA-DRB5</i>     | REACTOME_ADAPTIVE_IMMUNE_SYSTEM                    |
| 6:32930679   | <i>HLA-DRB5</i>     | REACTOME_ADAPTIVE_IMMUNE_SYSTEM                    |
| 6:32934409   | <i>HLA-DRB5</i>     | REACTOME_ADAPTIVE_IMMUNE_SYSTEM                    |
| 6:32973303   | <i>HLA-DRB5</i>     | REACTOME_ADAPTIVE_IMMUNE_SYSTEM                    |
| 6:32974268   | <i>HLA-DRB5</i>     | REACTOME_ADAPTIVE_IMMUNE_SYSTEM                    |
| 6:112137847  | <i>FYN</i>          | REACTOME_ADAPTIVE_IMMUNE_SYSTEM                    |
| 6:112151452  | <i>FYN</i>          | REACTOME_ADAPTIVE_IMMUNE_SYSTEM                    |
| 6:112175069  | <i>FYN</i>          | REACTOME_ADAPTIVE_IMMUNE_SYSTEM                    |
| 7:66096028   | <i>GS1-124K5.11</i> | REACTOME_ADAPTIVE_IMMUNE_SYSTEM                    |
| 7:66136281   | <i>GS1-124K5.11</i> | REACTOME_ADAPTIVE_IMMUNE_SYSTEM                    |
| 8:11353586   | <i>CTSB</i>         | REACTOME_ADAPTIVE_IMMUNE_SYSTEM                    |
| 8:11363667   | <i>CTSB</i>         | REACTOME_ADAPTIVE_IMMUNE_SYSTEM                    |
| 8:11381148   | <i>CTSB</i>         | REACTOME_ADAPTIVE_IMMUNE_SYSTEM                    |
| 8:11712443   | <i>CTSB</i>         | REACTOME_ADAPTIVE_IMMUNE_SYSTEM                    |
| 9:17579690   | <i>SH3GL2_2</i>     | REACTOME_ADAPTIVE_IMMUNE_SYSTEM                    |
| 9:17587160   | <i>SH3GL2_2</i>     | REACTOME_ADAPTIVE_IMMUNE_SYSTEM                    |
| 9:17609302   | <i>SH3GL2_2</i>     | REACTOME_ADAPTIVE_IMMUNE_SYSTEM                    |
| 9:17626762   | <i>SH3GL2_2</i>     | REACTOME_ADAPTIVE_IMMUNE_SYSTEM                    |
| 9:17627444   | <i>SH3GL2_2</i>     | REACTOME_ADAPTIVE_IMMUNE_SYSTEM                    |
| 9:17642664   | <i>SH3GL2_2</i>     | REACTOME_ADAPTIVE_IMMUNE_SYSTEM                    |
| 9:17710876   | <i>SH3GL2_2</i>     | REACTOME_ADAPTIVE_IMMUNE_SYSTEM                    |
| 9:17732590   | <i>SH3GL2_2</i>     | REACTOME_ADAPTIVE_IMMUNE_SYSTEM                    |
| 9:17737514   | <i>SH3GL2_2</i>     | REACTOME_ADAPTIVE_IMMUNE_SYSTEM                    |
| 9:17758945   | <i>SH3GL2_2</i>     | REACTOME_ADAPTIVE_IMMUNE_SYSTEM                    |

|              |                 |                                                               |
|--------------|-----------------|---------------------------------------------------------------|
| 9:33845203   | <i>UBAP2</i>    | REACTOME_ADAPTIVE_IMMUNE_SYSTEM                               |
| 10:103185542 | <i>GBF1</i>     | REACTOME_ADAPTIVE_IMMUNE_SYSTEM                               |
| 10:103305087 | <i>GBF1</i>     | REACTOME_ADAPTIVE_IMMUNE_SYSTEM                               |
| 10:103308244 | <i>GBF1</i>     | REACTOME_ADAPTIVE_IMMUNE_SYSTEM                               |
| 10:104258303 | <i>GBF1</i>     | REACTOME_ADAPTIVE_IMMUNE_SYSTEM                               |
| 16:30510571  | <i>SETD1A</i>   | REACTOME_ADAPTIVE_IMMUNE_SYSTEM                               |
| 16:30516492  | <i>SETD1A</i>   | REACTOME_ADAPTIVE_IMMUNE_SYSTEM                               |
| 16:30520856  | <i>SETD1A</i>   | REACTOME_ADAPTIVE_IMMUNE_SYSTEM                               |
| 17:43390763  | <i>CRHR1_2</i>  | REACTOME_ADAPTIVE_IMMUNE_SYSTEM                               |
| 17:45215865  | <i>WNT3</i>     | REACTOME_ADAPTIVE_IMMUNE_SYSTEM                               |
| 17:45244822  | <i>WNT3</i>     | REACTOME_ADAPTIVE_IMMUNE_SYSTEM                               |
| 3:123089448  | <i>KPNA1</i>    | REACTOME_ADENYLATE_CYCLASE_ACTIVATING_PATHWAY                 |
| 8:131799767  | <i>FAM49B</i>   | REACTOME_ADENYLATE_CYCLASE_ACTIVATING_PATHWAY                 |
| 8:131845512  | <i>FAM49B</i>   | REACTOME_ADENYLATE_CYCLASE_ACTIVATING_PATHWAY                 |
| 8:131865425  | <i>FAM49B</i>   | REACTOME_ADENYLATE_CYCLASE_ACTIVATING_PATHWAY                 |
| 8:131901170  | <i>FAM49B</i>   | REACTOME_ADENYLATE_CYCLASE_ACTIVATING_PATHWAY                 |
| 16:50300511  | <i>CASC16</i>   | REACTOME_ADENYLATE_CYCLASE_ACTIVATING_PATHWAY                 |
| 16:50317039  | <i>CASC16</i>   | REACTOME_ADENYLATE_CYCLASE_ACTIVATING_PATHWAY                 |
| 3:123089448  | <i>KPNA1</i>    | REACTOME_ADENYLATE_CYCLASE_INHIBITORY_PATHWAY                 |
| 8:131799767  | <i>FAM49B</i>   | REACTOME_ADENYLATE_CYCLASE_INHIBITORY_PATHWAY                 |
| 8:131845512  | <i>FAM49B</i>   | REACTOME_ADENYLATE_CYCLASE_INHIBITORY_PATHWAY                 |
| 8:131865425  | <i>FAM49B</i>   | REACTOME_ADENYLATE_CYCLASE_INHIBITORY_PATHWAY                 |
| 8:131901170  | <i>FAM49B</i>   | REACTOME_ADENYLATE_CYCLASE_INHIBITORY_PATHWAY                 |
| 16:50300511  | <i>CASC16</i>   | REACTOME_ADENYLATE_CYCLASE_INHIBITORY_PATHWAY                 |
| 16:50317039  | <i>CASC16</i>   | REACTOME_ADENYLATE_CYCLASE_INHIBITORY_PATHWAY                 |
| 17:39883520  | <i>RETREG3</i>  | REACTOME_ADHERENS_JUNCTIONS_INTERACTIONS                      |
| 3:151090424  | <i>MED12L</i>   | REACTOME_ADP_SIGNALLING_THROUGH_P2Y_PURINOCEPTOR_12           |
| 3:151099733  | <i>MED12L</i>   | REACTOME_ADP_SIGNALLING_THROUGH_P2Y_PURINOCEPTOR_12           |
| 19:2557113   | <i>SPPL2B</i>   | REACTOME_ADP_SIGNALLING_THROUGH_P2Y_PURINOCEPTOR_12           |
| 19:2563327   | <i>SPPL2B</i>   | REACTOME_ADP_SIGNALLING_THROUGH_P2Y_PURINOCEPTOR_12           |
| 19:2580057   | <i>SPPL2B</i>   | REACTOME_ADP_SIGNALLING_THROUGH_P2Y_PURINOCEPTOR_12           |
| 19:2660983   | <i>SPPL2B</i>   | REACTOME_ADP_SIGNALLING_THROUGH_P2Y_PURINOCEPTOR_12           |
| 19:2557113   | <i>SPPL2B</i>   | REACTOME_ADP_SIGNALLING_THROUGH_P2Y_PURINOCEPTOR_1            |
| 19:2563327   | <i>SPPL2B</i>   | REACTOME_ADP_SIGNALLING_THROUGH_P2Y_PURINOCEPTOR_1            |
| 19:2580057   | <i>SPPL2B</i>   | REACTOME_ADP_SIGNALLING_THROUGH_P2Y_PURINOCEPTOR_1            |
| 19:2660983   | <i>SPPL2B</i>   | REACTOME_ADP_SIGNALLING_THROUGH_P2Y_PURINOCEPTOR_1            |
| 19:3142784   | <i>SPPL2B</i>   | REACTOME_ADP_SIGNALLING_THROUGH_P2Y_PURINOCEPTOR_1            |
| 19:3147326   | <i>SPPL2B</i>   | REACTOME_ADP_SIGNALLING_THROUGH_P2Y_PURINOCEPTOR_1            |
| 3:123089448  | <i>KPNA1</i>    | REACTOME_ADRENALINE_NORADRENALINE_INHIBITS_INSULIN_SECRETION  |
| 19:2557113   | <i>SPPL2B</i>   | REACTOME_ADRENALINE_NORADRENALINE_INHIBITS_INSULIN_SECRETION  |
| 19:2563327   | <i>SPPL2B</i>   | REACTOME_ADRENALINE_NORADRENALINE_INHIBITS_INSULIN_SECRETION  |
| 19:2580057   | <i>SPPL2B</i>   | REACTOME_ADRENALINE_NORADRENALINE_INHIBITS_INSULIN_SECRETION  |
| 19:2660983   | <i>SPPL2B</i>   | REACTOME_ADRENALINE_NORADRENALINE_INHIBITS_INSULIN_SECRETION  |
| 6:32151443   | <i>HLA-DRB5</i> | REACTOME_ADVANCED_GLYCOSYLATION_ENDPRODUCT_RECEPTOR_SIGNALING |
| 9:33791164   | <i>UBAP2</i>    | REACTOME_ALPHA_DEFENSINS                                      |
| 6:31897219   | <i>HLA-DRB5</i> | REACTOME_ALTERNATIVE_COMPLEMENT_ACTIVATION                    |
| 8:17390689   | <i>FGF20</i>    | REACTOME_AMINO_ACID_TRANSPORT_ACROSS_THE_PLASMA_MEMBRANE      |
| 8:17402274   | <i>FGF20</i>    | REACTOME_AMINO_ACID_TRANSPORT_ACROSS_THE_PLASMA_MEMBRANE      |
| 8:17427186   | <i>FGF20</i>    | REACTOME_AMINO_ACID_TRANSPORT_ACROSS_THE_PLASMA_MEMBRANE      |
| 12:46618863  | <i>SCAF11</i>   | REACTOME_AMINO_ACID_TRANSPORT_ACROSS_THE_PLASMA_MEMBRANE      |
| 12:47192323  | <i>SCAF11</i>   | REACTOME_AMINO_ACID_TRANSPORT_ACROSS_THE_PLASMA_MEMBRANE      |
| 12:47222402  | <i>SCAF11</i>   | REACTOME_AMINO_ACID_TRANSPORT_ACROSS_THE_PLASMA_MEMBRANE      |
| 4:90677243   | <i>SNCA_2</i>   | REACTOME_AMYLOID_FIBER_FORMATION                              |

|              |                     |                                                                                           |
|--------------|---------------------|-------------------------------------------------------------------------------------------|
| 4:90700329   | <i>SNCA_2</i>       | REACTOME_AMYLOID_FIBER_FORMATION                                                          |
| 4:90703993   | <i>SNCA_2</i>       | REACTOME_AMYLOID_FIBER_FORMATION                                                          |
| 4:90738839   | <i>SNCA_2</i>       | REACTOME_AMYLOID_FIBER_FORMATION                                                          |
| 4:90757294   | <i>SNCA_2</i>       | REACTOME_AMYLOID_FIBER_FORMATION                                                          |
| 3:121553904  | <i>KPNA1</i>        | REACTOME_ANCHORING_OF_THE_BASAL_BODY_TO_THE_PLASMA_MEMBRANE                               |
| 4:15492268   | <i>BST1</i>         | REACTOME_ANCHORING_OF_THE_BASAL_BODY_TO_THE_PLASMA_MEMBRANE                               |
| 4:15547513   | <i>BST1</i>         | REACTOME_ANCHORING_OF_THE_BASAL_BODY_TO_THE_PLASMA_MEMBRANE                               |
| 9:34300212   | <i>UBAP2</i>        | REACTOME_ANCHORING_OF_THE_BASAL_BODY_TO_THE_PLASMA_MEMBRANE                               |
| 10:104258303 | <i>GBF1</i>         | REACTOME_ANCHORING_OF_THE_BASAL_BODY_TO_THE_PLASMA_MEMBRANE                               |
| 16:19562008  | <i>SYT17</i>        | REACTOME_ANCHORING_OF_THE_BASAL_BODY_TO_THE_PLASMA_MEMBRANE                               |
| 10:104591639 | <i>GBF1</i>         | REACTOME_ANDROGEN_BIOSYNTHESIS                                                            |
| 6:112137847  | <i>FYN</i>          | REACTOME_ANTIGEN_ACTIVATES_B_CELL_RECEPTOR_BCR_LEADING_TO_GENERATION_OF_SECOND_MESSENGERS |
| 6:112151452  | <i>FYN</i>          | REACTOME_ANTIGEN_ACTIVATES_B_CELL_RECEPTOR_BCR_LEADING_TO_GENERATION_OF_SECOND_MESSENGERS |
| 6:112175069  | <i>FYN</i>          | REACTOME_ANTIGEN_ACTIVATES_B_CELL_RECEPTOR_BCR_LEADING_TO_GENERATION_OF_SECOND_MESSENGERS |
| 8:11353586   | <i>CTSB</i>         | REACTOME_ANTIGEN_ACTIVATES_B_CELL_RECEPTOR_BCR_LEADING_TO_GENERATION_OF_SECOND_MESSENGERS |
| 8:11363667   | <i>CTSB</i>         | REACTOME_ANTIGEN_ACTIVATES_B_CELL_RECEPTOR_BCR_LEADING_TO_GENERATION_OF_SECOND_MESSENGERS |
| 8:11381148   | <i>CTSB</i>         | REACTOME_ANTIGEN_ACTIVATES_B_CELL_RECEPTOR_BCR_LEADING_TO_GENERATION_OF_SECOND_MESSENGERS |
| 6:29798642   | <i>TRIM40</i>       | REACTOME_ANTIGEN_PRESENTATION: FOLDING_ASSEMBLY_AND_PEPTIDE_LOADING_OF_CLASS_I_MHC        |
| 6:32789400   | <i>HLA-DRB5</i>     | REACTOME_ANTIGEN_PRESENTATION: FOLDING_ASSEMBLY_AND_PEPTIDE_LOADING_OF_CLASS_I_MHC        |
| 6:32791831   | <i>HLA-DRB5</i>     | REACTOME_ANTIGEN_PRESENTATION: FOLDING_ASSEMBLY_AND_PEPTIDE_LOADING_OF_CLASS_I_MHC        |
| 6:32797361   | <i>HLA-DRB5</i>     | REACTOME_ANTIGEN_PRESENTATION: FOLDING_ASSEMBLY_AND_PEPTIDE_LOADING_OF_CLASS_I_MHC        |
| 6:32802462   | <i>HLA-DRB5</i>     | REACTOME_ANTIGEN_PRESENTATION: FOLDING_ASSEMBLY_AND_PEPTIDE_LOADING_OF_CLASS_I_MHC        |
| 6:29798642   | <i>TRIM40</i>       | REACTOME_ANTIGEN_PROCESSING_CROSS_PRESENTATION                                            |
| 6:32789400   | <i>HLA-DRB5</i>     | REACTOME_ANTIGEN_PROCESSING_CROSS_PRESENTATION                                            |
| 6:32791831   | <i>HLA-DRB5</i>     | REACTOME_ANTIGEN_PROCESSING_CROSS_PRESENTATION                                            |
| 6:32797361   | <i>HLA-DRB5</i>     | REACTOME_ANTIGEN_PROCESSING_CROSS_PRESENTATION                                            |
| 6:32802462   | <i>HLA-DRB5</i>     | REACTOME_ANTIGEN_PROCESSING_CROSS_PRESENTATION                                            |
| 3:49740895   | <i>IP6K2</i>        | REACTOME_ANTIGEN_PROCESSING: UBIQUITINATION_PROTEASOME_DEGRADATION                        |
| 3:121319489  | <i>KPNA1</i>        | REACTOME_ANTIGEN_PROCESSING: UBIQUITINATION_PROTEASOME_DEGRADATION                        |
| 3:121324643  | <i>KPNA1</i>        | REACTOME_ANTIGEN_PROCESSING: UBIQUITINATION_PROTEASOME_DEGRADATION                        |
| 3:121340955  | <i>KPNA1</i>        | REACTOME_ANTIGEN_PROCESSING: UBIQUITINATION_PROTEASOME_DEGRADATION                        |
| 3:122289921  | <i>KPNA1</i>        | REACTOME_ANTIGEN_PROCESSING: UBIQUITINATION_PROTEASOME_DEGRADATION                        |
| 4:15608677   | <i>BST1</i>         | REACTOME_ANTIGEN_PROCESSING: UBIQUITINATION_PROTEASOME_DEGRADATION                        |
| 4:15618898   | <i>BST1</i>         | REACTOME_ANTIGEN_PROCESSING: UBIQUITINATION_PROTEASOME_DEGRADATION                        |
| 4:76407998   | <i>FAM47E-STBD1</i> | REACTOME_ANTIGEN_PROCESSING: UBIQUITINATION_PROTEASOME_DEGRADATION                        |
| 4:170015977  | <i>CLCN3</i>        | REACTOME_ANTIGEN_PROCESSING: UBIQUITINATION_PROTEASOME_DEGRADATION                        |
| 4:170031333  | <i>CLCN3</i>        | REACTOME_ANTIGEN_PROCESSING: UBIQUITINATION_PROTEASOME_DEGRADATION                        |
| 4:170101917  | <i>CLCN3</i>        | REACTOME_ANTIGEN_PROCESSING: UBIQUITINATION_PROTEASOME_DEGRADATION                        |
| 4:170161031  | <i>CLCN3</i>        | REACTOME_ANTIGEN_PROCESSING: UBIQUITINATION_PROTEASOME_DEGRADATION                        |
| 5:133710339  | <i>C5orf24</i>      | REACTOME_ANTIGEN_PROCESSING: UBIQUITINATION_PROTEASOME_DEGRADATION                        |
| 7:66096028   | <i>GS1-124K5.11</i> | REACTOME_ANTIGEN_PROCESSING: UBIQUITINATION_PROTEASOME_DEGRADATION                        |
| 7:66136281   | <i>GS1-124K5.11</i> | REACTOME_ANTIGEN_PROCESSING: UBIQUITINATION_PROTEASOME_DEGRADATION                        |
| 9:33845203   | <i>UBAP2</i>        | REACTOME_ANTIGEN_PROCESSING: UBIQUITINATION_PROTEASOME_DEGRADATION                        |
| 10:103185542 | <i>GBF1</i>         | REACTOME_ANTIGEN_PROCESSING: UBIQUITINATION_PROTEASOME_DEGRADATION                        |
| 10:103305087 | <i>GBF1</i>         | REACTOME_ANTIGEN_PROCESSING: UBIQUITINATION_PROTEASOME_DEGRADATION                        |
| 10:103308244 | <i>GBF1</i>         | REACTOME_ANTIGEN_PROCESSING: UBIQUITINATION_PROTEASOME_DEGRADATION                        |
| 17:45215865  | <i>WNT3</i>         | REACTOME_ANTIGEN_PROCESSING: UBIQUITINATION_PROTEASOME_DEGRADATION                        |
| 17:45244822  | <i>WNT3</i>         | REACTOME_ANTIGEN_PROCESSING: UBIQUITINATION_PROTEASOME_DEGRADATION                        |
| 9:33791164   | <i>UBAP2</i>        | REACTOME_ANTIMICROBIAL_PEPTIDES                                                           |
| 3:122200170  | <i>KPNA1</i>        | REACTOME_ANTIVIRAL_MECHANISM_BY_IFN_STIMULATED_GENES                                      |
| 17:7479140   | <i>V1NB1</i>        | REACTOME_ANTIVIRAL_MECHANISM_BY_IFN_STIMULATED_GENES                                      |
| 17:7480325   | <i>V1NB1</i>        | REACTOME_ANTIVIRAL_MECHANISM_BY_IFN_STIMULATED_GENES                                      |
| 17:45215865  | <i>WNT3</i>         | REACTOME_APC_C: CDC20_MEDIATED_DEGRADATION_OF_CYCLIN_B                                    |

|             |         |                                                                                                          |
|-------------|---------|----------------------------------------------------------------------------------------------------------|
| 17:45244822 | WNT3    | REACTOME_APC_C:CDH1_MEDIATED_DEGRADATION_OF_CYCLIN_B                                                     |
| 17:45215865 | WNT3    | REACTOME_APC_C:CDH1_MEDIATED_DEGRADATION_OF_CDC20_AND_OTHER_APC_C:CDH1_TARGETED_PROTEINS_IN_LATE_MITOSIS |
| 17:45244822 | WNT3    | REACTOME_APC_C:CDH1_MEDIATED_DEGRADATION_OF_CDC20_AND_OTHER_APC_C:CDH1_TARGETED_PROTEINS_IN_LATE_MITOSIS |
| 17:45215865 | WNT3    | REACTOME_APC_CDC20_MEDIATED_DEGRADATION_OF_NEK2A                                                         |
| 17:45244822 | WNT3    | REACTOME_APC_CDC20_MEDIATED_DEGRADATION_OF_NEK2A                                                         |
| 3:122200170 | KPNA1   | REACTOME_APOPTOSIS_INDUCED_DNA_FRAGMENTATION                                                             |
| 1:156059276 | GBAP1   | REACTOME_APOPTOTIC_CLEAVAGE_OF_CELLULAR_PROTEINS                                                         |
| 3:18395010  | SATB1   | REACTOME_APOPTOTIC_CLEAVAGE_OF_CELLULAR_PROTEINS                                                         |
| 3:18472577  | SATB1   | REACTOME_APOPTOTIC_CLEAVAGE_OF_CELLULAR_PROTEINS                                                         |
| 17:43999203 | WNT3    | REACTOME_APOPTOTIC_CLEAVAGE_OF_CELLULAR_PROTEINS                                                         |
| 17:44005297 | WNT3    | REACTOME_APOPTOTIC_CLEAVAGE_OF_CELLULAR_PROTEINS                                                         |
| 17:44019712 | WNT3    | REACTOME_APOPTOTIC_CLEAVAGE_OF_CELLULAR_PROTEINS                                                         |
| 17:44060492 | WNT3    | REACTOME_APOPTOTIC_CLEAVAGE_OF_CELLULAR_PROTEINS                                                         |
| 17:44065263 | WNT3    | REACTOME_APOPTOTIC_CLEAVAGE_OF_CELLULAR_PROTEINS                                                         |
| 17:44081178 | WNT3    | REACTOME_APOPTOTIC_CLEAVAGE_OF_CELLULAR_PROTEINS                                                         |
| 17:44083297 | WNT3    | REACTOME_APOPTOTIC_CLEAVAGE_OF_CELLULAR_PROTEINS                                                         |
| 1:156059276 | GBAP1   | REACTOME_APOPTOTIC_EXECUTION_PHASE                                                                       |
| 3:18395010  | SATB1   | REACTOME_APOPTOTIC_EXECUTION_PHASE                                                                       |
| 3:18472577  | SATB1   | REACTOME_APOPTOTIC_EXECUTION_PHASE                                                                       |
| 3:122200170 | KPNA1   | REACTOME_APOPTOTIC_EXECUTION_PHASE                                                                       |
| 17:43999203 | WNT3    | REACTOME_APOPTOTIC_EXECUTION_PHASE                                                                       |
| 17:44005297 | WNT3    | REACTOME_APOPTOTIC_EXECUTION_PHASE                                                                       |
| 17:44019712 | WNT3    | REACTOME_APOPTOTIC_EXECUTION_PHASE                                                                       |
| 17:44060492 | WNT3    | REACTOME_APOPTOTIC_EXECUTION_PHASE                                                                       |
| 17:44065263 | WNT3    | REACTOME_APOPTOTIC_EXECUTION_PHASE                                                                       |
| 17:44081178 | WNT3    | REACTOME_APOPTOTIC_EXECUTION_PHASE                                                                       |
| 17:44083297 | WNT3    | REACTOME_APOPTOTIC_EXECUTION_PHASE                                                                       |
| 3:48835245  | IP6K2   | REACTOME_AQUAPORIN_MEDIATED_TRANSPORT                                                                    |
| 3:123089448 | KPNA1   | REACTOME_AQUAPORIN_MEDIATED_TRANSPORT                                                                    |
| 8:131799767 | FAM49B  | REACTOME_AQUAPORIN_MEDIATED_TRANSPORT                                                                    |
| 8:131845512 | FAM49B  | REACTOME_AQUAPORIN_MEDIATED_TRANSPORT                                                                    |
| 8:131865425 | FAM49B  | REACTOME_AQUAPORIN_MEDIATED_TRANSPORT                                                                    |
| 8:131901170 | FAM49B  | REACTOME_AQUAPORIN_MEDIATED_TRANSPORT                                                                    |
| 9:33447547  | UBAP2   | REACTOME_AQUAPORIN_MEDIATED_TRANSPORT                                                                    |
| 16:50300511 | CASC16  | REACTOME_AQUAPORIN_MEDIATED_TRANSPORT                                                                    |
| 16:50317039 | CASC16  | REACTOME_AQUAPORIN_MEDIATED_TRANSPORT                                                                    |
| 19:2557113  | SPPL2B  | REACTOME_AQUAPORIN_MEDIATED_TRANSPORT                                                                    |
| 19:2563327  | SPPL2B  | REACTOME_AQUAPORIN_MEDIATED_TRANSPORT                                                                    |
| 19:2580057  | SPPL2B  | REACTOME_AQUAPORIN_MEDIATED_TRANSPORT                                                                    |
| 19:2660983  | SPPL2B  | REACTOME_AQUAPORIN_MEDIATED_TRANSPORT                                                                    |
| 17:7983799  | V1NB1   | REACTOME_ARACHIDONIC_ACID_METABOLISM                                                                     |
| 17:8019125  | V1NB1   | REACTOME_ARACHIDONIC_ACID_METABOLISM                                                                     |
| 2:134902070 | TMEM163 | REACTOME_ASPARAGINE_N_LINKED_GLYCOSYLATION                                                               |
| 2:134932210 | TMEM163 | REACTOME_ASPARAGINE_N_LINKED_GLYCOSYLATION                                                               |
| 2:134956835 | TMEM163 | REACTOME_ASPARAGINE_N_LINKED_GLYCOSYLATION                                                               |
| 2:134986578 | TMEM163 | REACTOME_ASPARAGINE_N_LINKED_GLYCOSYLATION                                                               |
| 2:134993021 | TMEM163 | REACTOME_ASPARAGINE_N_LINKED_GLYCOSYLATION                                                               |
| 2:135035038 | TMEM163 | REACTOME_ASPARAGINE_N_LINKED_GLYCOSYLATION                                                               |
| 2:135040234 | TMEM163 | REACTOME_ASPARAGINE_N_LINKED_GLYCOSYLATION                                                               |
| 2:135165078 | TMEM163 | REACTOME_ASPARAGINE_N_LINKED_GLYCOSYLATION                                                               |
| 2:135166385 | TMEM163 | REACTOME_ASPARAGINE_N_LINKED_GLYCOSYLATION                                                               |
| 3:121411876 | KPNA1   | REACTOME_ASPARAGINE_N_LINKED_GLYCOSYLATION                                                               |
| 3:121412702 | KPNA1   | REACTOME_ASPARAGINE_N_LINKED_GLYCOSYLATION                                                               |

|              |              |                                                                       |
|--------------|--------------|-----------------------------------------------------------------------|
| 3:122986429  | KPNA1        | REACTOME_ASPARAGINE_N_LINKED_GLYCOSYLATION                            |
| 4:76695927   | FAM47E-STBD1 | REACTOME_ASPARAGINE_N_LINKED_GLYCOSYLATION                            |
| 4:113947327  | CAMK2D       | REACTOME_ASPARAGINE_N_LINKED_GLYCOSYLATION                            |
| 4:114015252  | CAMK2D       | REACTOME_ASPARAGINE_N_LINKED_GLYCOSYLATION                            |
| 4:114032570  | CAMK2D       | REACTOME_ASPARAGINE_N_LINKED_GLYCOSYLATION                            |
| 4:114067233  | CAMK2D       | REACTOME_ASPARAGINE_N_LINKED_GLYCOSYLATION                            |
| 4:114077386  | CAMK2D       | REACTOME_ASPARAGINE_N_LINKED_GLYCOSYLATION                            |
| 4:114113772  | CAMK2D       | REACTOME_ASPARAGINE_N_LINKED_GLYCOSYLATION                            |
| 4:114122398  | CAMK2D       | REACTOME_ASPARAGINE_N_LINKED_GLYCOSYLATION                            |
| 4:114172749  | CAMK2D       | REACTOME_ASPARAGINE_N_LINKED_GLYCOSYLATION                            |
| 4:114217997  | CAMK2D       | REACTOME_ASPARAGINE_N_LINKED_GLYCOSYLATION                            |
| 6:32151443   | HLA-DRB5     | REACTOME_ASPARAGINE_N_LINKED_GLYCOSYLATION                            |
| 10:104005410 | GBF1         | REACTOME_ASPARAGINE_N_LINKED_GLYCOSYLATION                            |
| 10:104034550 | GBF1         | REACTOME_ASPARAGINE_N_LINKED_GLYCOSYLATION                            |
| 10:104258303 | GBF1         | REACTOME_ASPARAGINE_N_LINKED_GLYCOSYLATION                            |
| 10:121669571 | INPP5F       | REACTOME_ASPARAGINE_N_LINKED_GLYCOSYLATION                            |
| 10:121683206 | INPP5F       | REACTOME_ASPARAGINE_N_LINKED_GLYCOSYLATION                            |
| 10:121686714 | INPP5F       | REACTOME_ASPARAGINE_N_LINKED_GLYCOSYLATION                            |
| 10:121689030 | INPP5F       | REACTOME_ASPARAGINE_N_LINKED_GLYCOSYLATION                            |
| 17:7491546   | V1NB1        | REACTOME_ASPARAGINE_N_LINKED_GLYCOSYLATION                            |
| 17:44800946  | WNT3         | REACTOME_ASPARAGINE_N_LINKED_GLYCOSYLATION                            |
| 17:44833217  | WNT3         | REACTOME_ASPARAGINE_N_LINKED_GLYCOSYLATION                            |
| 17:45020426  | WNT3         | REACTOME_ASPARAGINE_N_LINKED_GLYCOSYLATION                            |
| 17:45059032  | WNT3         | REACTOME_ASPARAGINE_N_LINKED_GLYCOSYLATION                            |
| 17:45089680  | WNT3         | REACTOME_ASPARAGINE_N_LINKED_GLYCOSYLATION                            |
| 4:114424939  | CAMK2D       | REACTOME_ASSEMBLY_AND_CELL_SURFACE_PRESENTATION_OF_NMDA_RECEPTORS     |
| 4:114494052  | CAMK2D       | REACTOME_ASSEMBLY_AND_CELL_SURFACE_PRESENTATION_OF_NMDA_RECEPTORS     |
| 4:114529492  | CAMK2D       | REACTOME_ASSEMBLY_AND_CELL_SURFACE_PRESENTATION_OF_NMDA_RECEPTORS     |
| 4:114539964  | CAMK2D       | REACTOME_ASSEMBLY_AND_CELL_SURFACE_PRESENTATION_OF_NMDA_RECEPTORS     |
| 4:114597918  | CAMK2D       | REACTOME_ASSEMBLY_AND_CELL_SURFACE_PRESENTATION_OF_NMDA_RECEPTORS     |
| 11:83219006  | DLG2         | REACTOME_ASSEMBLY_AND_CELL_SURFACE_PRESENTATION_OF_NMDA_RECEPTORS     |
| 11:83232915  | DLG2         | REACTOME_ASSEMBLY_AND_CELL_SURFACE_PRESENTATION_OF_NMDA_RECEPTORS     |
| 11:83282740  | DLG2         | REACTOME_ASSEMBLY_AND_CELL_SURFACE_PRESENTATION_OF_NMDA_RECEPTORS     |
| 11:83387273  | DLG2         | REACTOME_ASSEMBLY_AND_CELL_SURFACE_PRESENTATION_OF_NMDA_RECEPTORS     |
| 11:83538733  | DLG2         | REACTOME_ASSEMBLY_AND_CELL_SURFACE_PRESENTATION_OF_NMDA_RECEPTORS     |
| 11:83544472  | DLG2         | REACTOME_ASSEMBLY_AND_CELL_SURFACE_PRESENTATION_OF_NMDA_RECEPTORS     |
| 11:83578152  | DLG2         | REACTOME_ASSEMBLY_AND_CELL_SURFACE_PRESENTATION_OF_NMDA_RECEPTORS     |
| 11:83647657  | DLG2         | REACTOME_ASSEMBLY_AND_CELL_SURFACE_PRESENTATION_OF_NMDA_RECEPTORS     |
| 11:83669903  | DLG2         | REACTOME_ASSEMBLY_AND_CELL_SURFACE_PRESENTATION_OF_NMDA_RECEPTORS     |
| 11:83736246  | DLG2         | REACTOME_ASSEMBLY_AND_CELL_SURFACE_PRESENTATION_OF_NMDA_RECEPTORS     |
| 11:83762918  | DLG2         | REACTOME_ASSEMBLY_AND_CELL_SURFACE_PRESENTATION_OF_NMDA_RECEPTORS     |
| 11:83823752  | DLG2         | REACTOME_ASSEMBLY_AND_CELL_SURFACE_PRESENTATION_OF_NMDA_RECEPTORS     |
| 11:83839992  | DLG2         | REACTOME_ASSEMBLY_AND_CELL_SURFACE_PRESENTATION_OF_NMDA_RECEPTORS     |
| 11:84104763  | DLG2         | REACTOME_ASSEMBLY_AND_CELL_SURFACE_PRESENTATION_OF_NMDA_RECEPTORS     |
| 11:84169039  | DLG2         | REACTOME_ASSEMBLY_AND_CELL_SURFACE_PRESENTATION_OF_NMDA_RECEPTORS     |
| 11:84221628  | DLG2         | REACTOME_ASSEMBLY_AND_CELL_SURFACE_PRESENTATION_OF_NMDA_RECEPTORS     |
| 11:84312008  | DLG2         | REACTOME_ASSEMBLY_AND_CELL_SURFACE_PRESENTATION_OF_NMDA_RECEPTORS     |
| 11:84324361  | DLG2         | REACTOME_ASSEMBLY_AND_CELL_SURFACE_PRESENTATION_OF_NMDA_RECEPTORS     |
| 11:84360346  | DLG2         | REACTOME_ASSEMBLY_AND_CELL_SURFACE_PRESENTATION_OF_NMDA_RECEPTORS     |
| 11:84403409  | DLG2         | REACTOME_ASSEMBLY_AND_CELL_SURFACE_PRESENTATION_OF_NMDA_RECEPTORS     |
| 17:7101771   | V1NB1        | REACTOME_ASSEMBLY_AND_CELL_SURFACE_PRESENTATION_OF_NMDA_RECEPTORS     |
| 6:33153528   | HLA-DRB5     | REACTOME_ASSEMBLY_OF_COLLAGEN_FIBRILS_AND_OTHER_MULTIMERIC_STRUCTURES |
| 8:11712443   | CTSB         | REACTOME_ASSEMBLY_OF_COLLAGEN_FIBRILS_AND_OTHER_MULTIMERIC_STRUCTURES |

|              |                |                                                                           |
|--------------|----------------|---------------------------------------------------------------------------|
| 8:23190941   | <i>BIN3</i>    | REACTOME_ASSEMBLY_OF_COLLAGEN_FIBRILS_AND_OTHER_MULTIMERIC_STRUCTURES     |
| 8:23212542   | <i>BIN3</i>    | REACTOME_ASSEMBLY_OF_COLLAGEN_FIBRILS_AND_OTHER_MULTIMERIC_STRUCTURES     |
| 8:23216225   | <i>BIN3</i>    | REACTOME_ASSEMBLY_OF_COLLAGEN_FIBRILS_AND_OTHER_MULTIMERIC_STRUCTURES     |
| 8:23223713   | <i>BIN3</i>    | REACTOME_ASSEMBLY_OF_COLLAGEN_FIBRILS_AND_OTHER_MULTIMERIC_STRUCTURES     |
| 8:17125768   | <i>FGF20</i>   | REACTOME_ASSEMBLY_OF_THE_HIV_VIRION                                       |
| 10:15199347  | <i>ITGA8</i>   | REACTOME_ASSEMBLY_OF_THE_HIV_VIRION                                       |
| 20:5934513   | <i>CRLS1</i>   | REACTOME_ASSEMBLY_OF_THE_PRE_REPLICATIVE_COMPLEX                          |
| 20:5935522   | <i>CRLS1</i>   | REACTOME_ASSEMBLY_OF_THE_PRE_REPLICATIVE_COMPLEX                          |
| 20:5968737   | <i>CRLS1</i>   | REACTOME_ASSEMBLY_OF_THE_PRE_REPLICATIVE_COMPLEX                          |
| 20:5968964   | <i>CRLS1</i>   | REACTOME_ASSEMBLY_OF_THE_PRE_REPLICATIVE_COMPLEX                          |
| 1:155205634  | <i>GBAP1</i>   | REACTOME_ASSOCIATION_OF_TRIC_CCT_WITH_TARGET_PROTEINS_DURING_BIOSYNTHESIS |
| 4:15608677   | <i>BST1</i>    | REACTOME_ASSOCIATION_OF_TRIC_CCT_WITH_TARGET_PROTEINS_DURING_BIOSYNTHESIS |
| 4:15618898   | <i>BST1</i>    | REACTOME_ASSOCIATION_OF_TRIC_CCT_WITH_TARGET_PROTEINS_DURING_BIOSYNTHESIS |
| 17:7129974   | <i>V1NB1</i>   | REACTOME_ASYMMETRIC_LOCALIZATION_OF_PCP_PROTEINS                          |
| 6:71594785   | <i>RIMS1</i>   | REACTOME_A_TETRASACCHARIDE_LINKER_SEQUENCE_IS_REQUIRED_FOR_GAG_SYNTHESIS  |
| 11:134255325 | <i>IGSF9B</i>  | REACTOME_A_TETRASACCHARIDE_LINKER_SEQUENCE_IS_REQUIRED_FOR_GAG_SYNTHESIS  |
| 1:161875645  | <i>FCGR2A</i>  | REACTOME_ATF4_ACTIVATES_GENES_IN_RESPONSE_TO_ENDOPLASMIC_RETICULUM_STRESS |
| 1:161930954  | <i>FCGR2A</i>  | REACTOME_ATF4_ACTIVATES_GENES_IN_RESPONSE_TO_ENDOPLASMIC_RETICULUM_STRESS |
| 1:161875645  | <i>FCGR2A</i>  | REACTOME_ATF6_ATF6_ALPHA_ACTIVATES_CHAPERONE_GENES                        |
| 1:161930954  | <i>FCGR2A</i>  | REACTOME_ATF6_ATF6_ALPHA_ACTIVATES_CHAPERONE_GENES                        |
| 1:161875645  | <i>FCGR2A</i>  | REACTOME_ATF6_ATF6_ALPHA_ACTIVATES_CHAPERONES                             |
| 1:161930954  | <i>FCGR2A</i>  | REACTOME_ATF6_ATF6_ALPHA_ACTIVATES_CHAPERONES                             |
| 10:104258303 | <i>GBF1</i>    | REACTOME_AURKA_ACTIVATION_BY_TPX2                                         |
| 16:19562008  | <i>SYT17</i>   | REACTOME_AURKA_ACTIVATION_BY_TPX2                                         |
| 8:17125768   | <i>FGF20</i>   | REACTOME_AUTOPHAGY                                                        |
| 12:133295501 | <i>FBRSL1</i>  | REACTOME_AUTOPHAGY                                                        |
| 14:55871532  | <i>GCH1</i>    | REACTOME_AUTOPHAGY                                                        |
| 17:42990894  | <i>CRHR1_2</i> | REACTOME_AUTOPHAGY                                                        |
| 1:171837985  | <i>VAMP4</i>   | REACTOME_AXON_GUIDANCE                                                    |
| 1:171945488  | <i>VAMP4</i>   | REACTOME_AXON_GUIDANCE                                                    |
| 1:172137119  | <i>VAMP4</i>   | REACTOME_AXON_GUIDANCE                                                    |
| 1:172386261  | <i>VAMP4</i>   | REACTOME_AXON_GUIDANCE                                                    |
| 1:204876966  | <i>RAB29</i>   | REACTOME_AXON_GUIDANCE                                                    |
| 1:204940972  | <i>RAB29</i>   | REACTOME_AXON_GUIDANCE                                                    |
| 1:227067656  | <i>ITPKB</i>   | REACTOME_AXON_GUIDANCE                                                    |
| 3:48835245   | <i>IP6K2</i>   | REACTOME_AXON_GUIDANCE                                                    |
| 3:49406095   | <i>IP6K2</i>   | REACTOME_AXON_GUIDANCE                                                    |
| 3:49424231   | <i>IP6K2</i>   | REACTOME_AXON_GUIDANCE                                                    |
| 3:49450137   | <i>IP6K2</i>   | REACTOME_AXON_GUIDANCE                                                    |
| 3:49561208   | <i>IP6K2</i>   | REACTOME_AXON_GUIDANCE                                                    |
| 4:113947327  | <i>CAMK2D</i>  | REACTOME_AXON_GUIDANCE                                                    |
| 4:114015252  | <i>CAMK2D</i>  | REACTOME_AXON_GUIDANCE                                                    |
| 4:114032570  | <i>CAMK2D</i>  | REACTOME_AXON_GUIDANCE                                                    |
| 4:114067233  | <i>CAMK2D</i>  | REACTOME_AXON_GUIDANCE                                                    |
| 4:114077386  | <i>CAMK2D</i>  | REACTOME_AXON_GUIDANCE                                                    |
| 4:114113772  | <i>CAMK2D</i>  | REACTOME_AXON_GUIDANCE                                                    |
| 4:114122398  | <i>CAMK2D</i>  | REACTOME_AXON_GUIDANCE                                                    |
| 4:114172749  | <i>CAMK2D</i>  | REACTOME_AXON_GUIDANCE                                                    |
| 4:114217997  | <i>CAMK2D</i>  | REACTOME_AXON_GUIDANCE                                                    |
| 6:112137847  | <i>FYN</i>     | REACTOME_AXON_GUIDANCE                                                    |
| 6:112151452  | <i>FYN</i>     | REACTOME_AXON_GUIDANCE                                                    |
| 6:112175069  | <i>FYN</i>     | REACTOME_AXON_GUIDANCE                                                    |
| 8:21565088   | <i>BIN3</i>    | REACTOME_AXON_GUIDANCE                                                    |

|              |                     |                                                                                                     |
|--------------|---------------------|-----------------------------------------------------------------------------------------------------|
| 8:21582921   | <i>BIN3</i>         | REACTOME_AXON_GUIDANCE                                                                              |
| 8:21665306   | <i>BIN3</i>         | REACTOME_AXON_GUIDANCE                                                                              |
| 8:21668901   | <i>BIN3</i>         | REACTOME_AXON_GUIDANCE                                                                              |
| 9:17579690   | <i>SH3GL2_2</i>     | REACTOME_AXON_GUIDANCE                                                                              |
| 9:17587160   | <i>SH3GL2_2</i>     | REACTOME_AXON_GUIDANCE                                                                              |
| 9:17609302   | <i>SH3GL2_2</i>     | REACTOME_AXON_GUIDANCE                                                                              |
| 9:17626762   | <i>SH3GL2_2</i>     | REACTOME_AXON_GUIDANCE                                                                              |
| 9:17627444   | <i>SH3GL2_2</i>     | REACTOME_AXON_GUIDANCE                                                                              |
| 9:17642664   | <i>SH3GL2_2</i>     | REACTOME_AXON_GUIDANCE                                                                              |
| 9:17710876   | <i>SH3GL2_2</i>     | REACTOME_AXON_GUIDANCE                                                                              |
| 9:17732590   | <i>SH3GL2_2</i>     | REACTOME_AXON_GUIDANCE                                                                              |
| 9:17737514   | <i>SH3GL2_2</i>     | REACTOME_AXON_GUIDANCE                                                                              |
| 9:17758945   | <i>SH3GL2_2</i>     | REACTOME_AXON_GUIDANCE                                                                              |
| 12:41144387  | <i>LRRK2_2</i>      | REACTOME_AXON_GUIDANCE                                                                              |
| 12:41147295  | <i>LRRK2_2</i>      | REACTOME_AXON_GUIDANCE                                                                              |
| 12:41195135  | <i>LRRK2_2</i>      | REACTOME_AXON_GUIDANCE                                                                              |
| 12:41251554  | <i>LRRK2_2</i>      | REACTOME_AXON_GUIDANCE                                                                              |
| 12:41255129  | <i>LRRK2_2</i>      | REACTOME_AXON_GUIDANCE                                                                              |
| 12:41297969  | <i>LRRK2_2</i>      | REACTOME_AXON_GUIDANCE                                                                              |
| 12:41407403  | <i>LRRK2_2</i>      | REACTOME_AXON_GUIDANCE                                                                              |
| 17:7101771   | <i>V1NB1</i>        | REACTOME_AXON_GUIDANCE                                                                              |
| 17:42454243  | <i>FAM171A2</i>     | REACTOME_AXON_GUIDANCE                                                                              |
| 1:226568665  | <i>ITPKB</i>        | REACTOME_BASE_EXCISION_REPAIR                                                                       |
| 12:133206648 | <i>FBRSL1</i>       | REACTOME_BASE_EXCISION_REPAIR                                                                       |
| 12:133223685 | <i>FBRSL1</i>       | REACTOME_BASE_EXCISION_REPAIR                                                                       |
| 17:7560294   | <i>V1NB1</i>        | REACTOME_BASIGIN_INTERACTIONS                                                                       |
| 3:49406095   | <i>IP6K2</i>        | REACTOME_BETA_CATENIN_INDEPENDENT_WNT_SIGNALING                                                     |
| 3:49424231   | <i>IP6K2</i>        | REACTOME_BETA_CATENIN_INDEPENDENT_WNT_SIGNALING                                                     |
| 3:49450137   | <i>IP6K2</i>        | REACTOME_BETA_CATENIN_INDEPENDENT_WNT_SIGNALING                                                     |
| 17:7129974   | <i>V1NB1</i>        | REACTOME_BETA_CATENIN_INDEPENDENT_WNT_SIGNALING                                                     |
| 19:2557113   | <i>SPPL2B</i>       | REACTOME_BETA_CATENIN_INDEPENDENT_WNT_SIGNALING                                                     |
| 19:2563327   | <i>SPPL2B</i>       | REACTOME_BETA_CATENIN_INDEPENDENT_WNT_SIGNALING                                                     |
| 19:2580057   | <i>SPPL2B</i>       | REACTOME_BETA_CATENIN_INDEPENDENT_WNT_SIGNALING                                                     |
| 19:2660983   | <i>SPPL2B</i>       | REACTOME_BETA_CATENIN_INDEPENDENT_WNT_SIGNALING                                                     |
| 5:133558885  | <i>C5orf24</i>      | REACTOME_BETA_CATENIN_PHOSPHORYLATION_CASCADE                                                       |
| 17:42332803  | <i>FAM171A2</i>     | REACTOME_BICARBONATE_TRANSPORTERS                                                                   |
| 17:42338993  | <i>FAM171A2</i>     | REACTOME_BICARBONATE_TRANSPORTERS                                                                   |
| 16:30999462  | <i>SETD1A</i>       | REACTOME_BILE_ACID_AND_BILE_SALT_METABOLISM                                                         |
| 8:16086683   | <i>FGF20</i>        | REACTOME_BINDING_AND_UPTAKE_OF_LIGANDS_BY_SCAVENGER_RECEPTORS                                       |
| 8:16135246   | <i>FGF20</i>        | REACTOME_BINDING_AND_UPTAKE_OF_LIGANDS_BY_SCAVENGER_RECEPTORS                                       |
| 7:65705034   | <i>GS1-124K5.11</i> | REACTOME_BIOLOGICAL_OXIDATIONS                                                                      |
| 7:65824287   | <i>GS1-124K5.11</i> | REACTOME_BIOLOGICAL_OXIDATIONS                                                                      |
| 10:104635620 | <i>GBF1</i>         | REACTOME_BIOLOGICAL_OXIDATIONS                                                                      |
| 17:7491546   | <i>V1NB1</i>        | OSYNTHESIS_OF_THE_N_GLYCAN_PRECURSOR_DOLICHOL_LIPID_LINKED_OLIGOSACCHARIDE_LLO_AND_TRANSFER_TO_A_NA |
| 3:182760073  | <i>MCCC1</i>        | REACTOME_BIOTIN_TRANSPORT_AND_METABOLISM                                                            |
| 21:38136802  | <i>DYRK1A</i>       | REACTOME_BIOTIN_TRANSPORT_AND_METABOLISM                                                            |
| 21:38168749  | <i>DYRK1A</i>       | REACTOME_BIOTIN_TRANSPORT_AND_METABOLISM                                                            |
| 21:38210057  | <i>DYRK1A</i>       | REACTOME_BIOTIN_TRANSPORT_AND_METABOLISM                                                            |
| 21:38238679  | <i>DYRK1A</i>       | REACTOME_BIOTIN_TRANSPORT_AND_METABOLISM                                                            |
| 21:38328886  | <i>DYRK1A</i>       | REACTOME_BIOTIN_TRANSPORT_AND_METABOLISM                                                            |
| 21:38332144  | <i>DYRK1A</i>       | REACTOME_BIOTIN_TRANSPORT_AND_METABOLISM                                                            |
| 21:38356061  | <i>DYRK1A</i>       | REACTOME_BIOTIN_TRANSPORT_AND_METABOLISM                                                            |
| 2:168682052  | <i>STK39</i>        | REACTOME_BLOOD_GROUP_SYSTEMS_BIOSYNTHESIS                                                           |

|              |          |                                                                      |
|--------------|----------|----------------------------------------------------------------------|
| 2:101439596  | MAP4K4   | REACTOME_BMAL1:CLOCK_NPAS2_ACTIVATES_CIRCADIAN_GENE_EXPRESSION       |
| 2:101464631  | MAP4K4   | REACTOME_BMAL1:CLOCK_NPAS2_ACTIVATES_CIRCADIAN_GENE_EXPRESSION       |
| 2:101547064  | MAP4K4   | REACTOME_BMAL1:CLOCK_NPAS2_ACTIVATES_CIRCADIAN_GENE_EXPRESSION       |
| 2:101550181  | MAP4K4   | REACTOME_BMAL1:CLOCK_NPAS2_ACTIVATES_CIRCADIAN_GENE_EXPRESSION       |
| 2:101578010  | MAP4K4   | REACTOME_BMAL1:CLOCK_NPAS2_ACTIVATES_CIRCADIAN_GENE_EXPRESSION       |
| 2:101603812  | MAP4K4   | REACTOME_BMAL1:CLOCK_NPAS2_ACTIVATES_CIRCADIAN_GENE_EXPRESSION       |
| 3:182760073  | MCCC1    | REACTOME_BRANCHED_CHAIN_AMINO_ACID_CATABOLISM                        |
| 11:134130174 | IGSF9B   | REACTOME_BRANCHED_CHAIN_AMINO_ACID_CATABOLISM                        |
| 8:17125768   | FGF20    | REACTOME_BUDDING_AND_MATURATION_OF_HIV_VIRION                        |
| 1:154701406  | GBAP1    | REACTOME_CA2PLUS_ACTIVATED_KPLUS_CHANNELS                            |
| 1:154776412  | GBAP1    | REACTOME_CA2PLUS_ACTIVATED_KPLUS_CHANNELS                            |
| 1:154801670  | GBAP1    | REACTOME_CA2PLUS_ACTIVATED_KPLUS_CHANNELS                            |
| 1:154804988  | GBAP1    | REACTOME_CA2PLUS_ACTIVATED_KPLUS_CHANNELS                            |
| 19:2557113   | SPPL2B   | REACTOME_CA2PLUS_PATHWAY                                             |
| 19:2563327   | SPPL2B   | REACTOME_CA2PLUS_PATHWAY                                             |
| 19:2580057   | SPPL2B   | REACTOME_CA2PLUS_PATHWAY                                             |
| 19:2660983   | SPPL2B   | REACTOME_CA2PLUS_PATHWAY                                             |
| 3:48835245   | IP6K2    | REACTOME_CA_DEPENDENT_EVENTS                                         |
| 3:123089448  | KPNA1    | REACTOME_CA_DEPENDENT_EVENTS                                         |
| 4:114424939  | CAMK2D   | REACTOME_CA_DEPENDENT_EVENTS                                         |
| 4:114494052  | CAMK2D   | REACTOME_CA_DEPENDENT_EVENTS                                         |
| 4:114529492  | CAMK2D   | REACTOME_CA_DEPENDENT_EVENTS                                         |
| 4:114539964  | CAMK2D   | REACTOME_CA_DEPENDENT_EVENTS                                         |
| 4:114597918  | CAMK2D   | REACTOME_CA_DEPENDENT_EVENTS                                         |
| 8:131799767  | FAM49B   | REACTOME_CA_DEPENDENT_EVENTS                                         |
| 8:131845512  | FAM49B   | REACTOME_CA_DEPENDENT_EVENTS                                         |
| 8:131865425  | FAM49B   | REACTOME_CA_DEPENDENT_EVENTS                                         |
| 8:131901170  | FAM49B   | REACTOME_CA_DEPENDENT_EVENTS                                         |
| 16:50300511  | CASC16   | REACTOME_CA_DEPENDENT_EVENTS                                         |
| 16:50317039  | CASC16   | REACTOME_CA_DEPENDENT_EVENTS                                         |
| 6:32151443   | HLA-DRB5 | REACTOME_CALNEXIN_CALRETICULIN_CYCLE                                 |
| 4:114424939  | CAMK2D   | REACTOME_CAMK_IV_MEDIATED_PHOSPHORYLATION_OF_CREB                    |
| 4:114494052  | CAMK2D   | REACTOME_CAMK_IV_MEDIATED_PHOSPHORYLATION_OF_CREB                    |
| 4:114529492  | CAMK2D   | REACTOME_CAMK_IV_MEDIATED_PHOSPHORYLATION_OF_CREB                    |
| 4:114539964  | CAMK2D   | REACTOME_CAMK_IV_MEDIATED_PHOSPHORYLATION_OF_CREB                    |
| 4:114597918  | CAMK2D   | REACTOME_CAMK_IV_MEDIATED_PHOSPHORYLATION_OF_CREB                    |
| 3:49462410   | IP6K2    | REACTOME_CARBOXYTERMINAL_POST_TRANSLATIONAL_MODIFICATIONS_OF_TUBULIN |
| 14:76135546  | RPS6KL1  | REACTOME_CARBOXYTERMINAL_POST_TRANSLATIONAL_MODIFICATIONS_OF_TUBULIN |
| 14:76159192  | RPS6KL1  | REACTOME_CARBOXYTERMINAL_POST_TRANSLATIONAL_MODIFICATIONS_OF_TUBULIN |
| 14:76169229  | RPS6KL1  | REACTOME_CARBOXYTERMINAL_POST_TRANSLATIONAL_MODIFICATIONS_OF_TUBULIN |
| 14:76170371  | RPS6KL1  | REACTOME_CARBOXYTERMINAL_POST_TRANSLATIONAL_MODIFICATIONS_OF_TUBULIN |
| 14:76244271  | RPS6KL1  | REACTOME_CARBOXYTERMINAL_POST_TRANSLATIONAL_MODIFICATIONS_OF_TUBULIN |
| 2:95967628   | KCNIP3   | REACTOME_CARDIAC_CONDUCTION                                          |
| 4:114424939  | CAMK2D   | REACTOME_CARDIAC_CONDUCTION                                          |
| 4:114494052  | CAMK2D   | REACTOME_CARDIAC_CONDUCTION                                          |
| 4:114529492  | CAMK2D   | REACTOME_CARDIAC_CONDUCTION                                          |
| 4:114539964  | CAMK2D   | REACTOME_CARDIAC_CONDUCTION                                          |
| 4:114597918  | CAMK2D   | REACTOME_CARDIAC_CONDUCTION                                          |
| 8:11558567   | CTSB     | REACTOME_CARDIAC_CONDUCTION                                          |
| 8:11599269   | CTSB     | REACTOME_CARDIAC_CONDUCTION                                          |
| 14:88681675  | GALC     | REACTOME_CARDIAC_CONDUCTION                                          |
| 14:88709038  | GALC     | REACTOME_CARDIAC_CONDUCTION                                          |
| 14:88738350  | GALC     | REACTOME_CARDIAC_CONDUCTION                                          |

|              |                     |                                                                           |
|--------------|---------------------|---------------------------------------------------------------------------|
| 14:88769689  | <i>GALC</i>         | REACTOME_CARDIAC_CONDUCTION                                               |
| 14:88778263  | <i>GALC</i>         | REACTOME_CARDIAC_CONDUCTION                                               |
| 17:7560294   | <i>V1NB1</i>        | REACTOME_CARDIAC_CONDUCTION                                               |
| 17:45020426  | <i>WNT3</i>         | REACTOME_CARGO_CONCENTRATION_IN_THE_ER                                    |
| 17:45059032  | <i>WNT3</i>         | REACTOME_CARGO_CONCENTRATION_IN_THE_ER                                    |
| 17:45089680  | <i>WNT3</i>         | REACTOME_CARGO_CONCENTRATION_IN_THE_ER                                    |
| 1:155847427  | <i>GBAP1</i>        | REACTOME_CARGO_RECOGNITION_FOR_CLATHRIN_MEDIATED_ENDOCYTOSIS              |
| 1:171689486  | <i>VAMP4</i>        | REACTOME_CARGO_RECOGNITION_FOR_CLATHRIN_MEDIATED_ENDOCYTOSIS              |
| 2:170012307  | <i>STK39</i>        | REACTOME_CARGO_RECOGNITION_FOR_CLATHRIN_MEDIATED_ENDOCYTOSIS              |
| 2:170028024  | <i>STK39</i>        | REACTOME_CARGO_RECOGNITION_FOR_CLATHRIN_MEDIATED_ENDOCYTOSIS              |
| 2:170066424  | <i>STK39</i>        | REACTOME_CARGO_RECOGNITION_FOR_CLATHRIN_MEDIATED_ENDOCYTOSIS              |
| 4:77104152   | <i>FAM47E-STBD1</i> | REACTOME_CARGO_RECOGNITION_FOR_CLATHRIN_MEDIATED_ENDOCYTOSIS              |
| 4:77124196   | <i>FAM47E-STBD1</i> | REACTOME_CARGO_RECOGNITION_FOR_CLATHRIN_MEDIATED_ENDOCYTOSIS              |
| 4:77134786   | <i>FAM47E-STBD1</i> | REACTOME_CARGO_RECOGNITION_FOR_CLATHRIN_MEDIATED_ENDOCYTOSIS              |
| 9:17579690   | <i>SH3GL2_2</i>     | REACTOME_CARGO_RECOGNITION_FOR_CLATHRIN_MEDIATED_ENDOCYTOSIS              |
| 9:17587160   | <i>SH3GL2_2</i>     | REACTOME_CARGO_RECOGNITION_FOR_CLATHRIN_MEDIATED_ENDOCYTOSIS              |
| 9:17609302   | <i>SH3GL2_2</i>     | REACTOME_CARGO_RECOGNITION_FOR_CLATHRIN_MEDIATED_ENDOCYTOSIS              |
| 9:17626762   | <i>SH3GL2_2</i>     | REACTOME_CARGO_RECOGNITION_FOR_CLATHRIN_MEDIATED_ENDOCYTOSIS              |
| 9:17627444   | <i>SH3GL2_2</i>     | REACTOME_CARGO_RECOGNITION_FOR_CLATHRIN_MEDIATED_ENDOCYTOSIS              |
| 9:17642664   | <i>SH3GL2_2</i>     | REACTOME_CARGO_RECOGNITION_FOR_CLATHRIN_MEDIATED_ENDOCYTOSIS              |
| 9:17710876   | <i>SH3GL2_2</i>     | REACTOME_CARGO_RECOGNITION_FOR_CLATHRIN_MEDIATED_ENDOCYTOSIS              |
| 9:17732590   | <i>SH3GL2_2</i>     | REACTOME_CARGO_RECOGNITION_FOR_CLATHRIN_MEDIATED_ENDOCYTOSIS              |
| 9:17737514   | <i>SH3GL2_2</i>     | REACTOME_CARGO_RECOGNITION_FOR_CLATHRIN_MEDIATED_ENDOCYTOSIS              |
| 9:17758945   | <i>SH3GL2_2</i>     | REACTOME_CARGO_RECOGNITION_FOR_CLATHRIN_MEDIATED_ENDOCYTOSIS              |
| 17:7129974   | <i>V1NB1</i>        | REACTOME_CARGO_RECOGNITION_FOR_CLATHRIN_MEDIATED_ENDOCYTOSIS              |
| 8:131145058  | <i>FAM49B</i>       | REACTOME_CARGO_TRAFFICKING_TO_THE_PERICILIARY_MEMBRANE                    |
| 8:131153067  | <i>FAM49B</i>       | REACTOME_CARGO_TRAFFICKING_TO_THE_PERICILIARY_MEMBRANE                    |
| 8:131245821  | <i>FAM49B</i>       | REACTOME_CARGO_TRAFFICKING_TO_THE_PERICILIARY_MEMBRANE                    |
| 8:131328260  | <i>FAM49B</i>       | REACTOME_CARGO_TRAFFICKING_TO_THE_PERICILIARY_MEMBRANE                    |
| 8:131404984  | <i>FAM49B</i>       | REACTOME_CARGO_TRAFFICKING_TO_THE_PERICILIARY_MEMBRANE                    |
| 8:131408202  | <i>FAM49B</i>       | REACTOME_CARGO_TRAFFICKING_TO_THE_PERICILIARY_MEMBRANE                    |
| 8:131455469  | <i>FAM49B</i>       | REACTOME_CARGO_TRAFFICKING_TO_THE_PERICILIARY_MEMBRANE                    |
| 10:104005410 | <i>GBF1</i>         | REACTOME_CARGO_TRAFFICKING_TO_THE_PERICILIARY_MEMBRANE                    |
| 10:104034550 | <i>GBF1</i>         | REACTOME_CARGO_TRAFFICKING_TO_THE_PERICILIARY_MEMBRANE                    |
| 10:104443875 | <i>GBF1</i>         | REACTOME_CARGO_TRAFFICKING_TO_THE_PERICILIARY_MEMBRANE                    |
| 10:104452818 | <i>GBF1</i>         | REACTOME_CARGO_TRAFFICKING_TO_THE_PERICILIARY_MEMBRANE                    |
| 8:23050400   | <i>BIN3</i>         | REACTOME_CASPASE_ACTIVATION_VIA_DEATH_RECEPTORS_IN_THE_PRESENCE_OF_LIGAND |
| 8:23050400   | <i>BIN3</i>         | REACTOME_CASPASE_ACTIVATION_VIA_EXTRINSIC_APOPTOTIC_SIGNALING_PATHWAY     |
| 17:43999203  | <i>WNT3</i>         | REACTOME_CASPASE_MEDIATED_CLEAVAGE_OF_CYTOSKELETAL_PROTEINS               |
| 17:44005297  | <i>WNT3</i>         | REACTOME_CASPASE_MEDIATED_CLEAVAGE_OF_CYTOSKELETAL_PROTEINS               |
| 17:44019712  | <i>WNT3</i>         | REACTOME_CASPASE_MEDIATED_CLEAVAGE_OF_CYTOSKELETAL_PROTEINS               |
| 17:44060492  | <i>WNT3</i>         | REACTOME_CASPASE_MEDIATED_CLEAVAGE_OF_CYTOSKELETAL_PROTEINS               |
| 17:44065263  | <i>WNT3</i>         | REACTOME_CASPASE_MEDIATED_CLEAVAGE_OF_CYTOSKELETAL_PROTEINS               |
| 17:44081178  | <i>WNT3</i>         | REACTOME_CASPASE_MEDIATED_CLEAVAGE_OF_CYTOSKELETAL_PROTEINS               |
| 17:44083297  | <i>WNT3</i>         | REACTOME_CASPASE_MEDIATED_CLEAVAGE_OF_CYTOSKELETAL_PROTEINS               |
| 6:112137847  | <i>FYN</i>          | REACTOME_CD209_DC_SIGN_SIGNALING                                          |
| 6:112151452  | <i>FYN</i>          | REACTOME_CD209_DC_SIGN_SIGNALING                                          |
| 6:112175069  | <i>FYN</i>          | REACTOME_CD209_DC_SIGN_SIGNALING                                          |
| 6:112137847  | <i>FYN</i>          | REACTOME_CD28_CO_STIMULATION                                              |
| 6:112151452  | <i>FYN</i>          | REACTOME_CD28_CO_STIMULATION                                              |
| 6:112175069  | <i>FYN</i>          | REACTOME_CD28_CO_STIMULATION                                              |
| 17:43390763  | <i>CRHR1_2</i>      | REACTOME_CD28_CO_STIMULATION                                              |
| 6:112137847  | <i>FYN</i>          | REACTOME_CD28_DEPENDENT_PI3K_AKT_SIGNALING                                |

|              |                     |                                                           |
|--------------|---------------------|-----------------------------------------------------------|
| 6:112151452  | <i>FYN</i>          | REACTOME_CD28_DEPENDENT_PI3K_AKT_SIGNALING                |
| 6:112175069  | <i>FYN</i>          | REACTOME_CD28_DEPENDENT_PI3K_AKT_SIGNALING                |
| 17:43390763  | <i>CRHR1_2</i>      | REACTOME_CD28_DEPENDENT_PI3K_AKT_SIGNALING                |
| 6:112137847  | <i>FYN</i>          | REACTOME_CD28_DEPENDENT_VAV1_PATHWAY                      |
| 6:112151452  | <i>FYN</i>          | REACTOME_CD28_DEPENDENT_VAV1_PATHWAY                      |
| 6:112175069  | <i>FYN</i>          | REACTOME_CD28_DEPENDENT_VAV1_PATHWAY                      |
| 20:5934513   | <i>CRLS1</i>        | REACTOME_CDC6_ASSOCIATION_WITH_THE_ORC:ORIGIN_COMPLEX     |
| 20:5935522   | <i>CRLS1</i>        | REACTOME_CDC6_ASSOCIATION_WITH_THE_ORC:ORIGIN_COMPLEX     |
| 20:5968737   | <i>CRLS1</i>        | REACTOME_CDC6_ASSOCIATION_WITH_THE_ORC:ORIGIN_COMPLEX     |
| 20:5968964   | <i>CRLS1</i>        | REACTOME_CDC6_ASSOCIATION_WITH_THE_ORC:ORIGIN_COMPLEX     |
| 17:45215865  | <i>WNT3</i>         | REACTOME_CDK_MEDIATED_PHOSPHORYLATION_AND_REMOVAL_OF_CDC6 |
| 17:45244822  | <i>WNT3</i>         | REACTOME_CDK_MEDIATED_PHOSPHORYLATION_AND_REMOVAL_OF_CDC6 |
| 6:112137847  | <i>FYN</i>          | REACTOME_CELL_CELL_COMMUNICATION                          |
| 6:112151452  | <i>FYN</i>          | REACTOME_CELL_CELL_COMMUNICATION                          |
| 6:112175069  | <i>FYN</i>          | REACTOME_CELL_CELL_COMMUNICATION                          |
| 17:39883520  | <i>RETREG3</i>      | REACTOME_CELL_CELL_COMMUNICATION                          |
| 21:37854286  | <i>DYRK1A</i>       | REACTOME_CELL_CELL_COMMUNICATION                          |
| 21:37859449  | <i>DYRK1A</i>       | REACTOME_CELL_CELL_COMMUNICATION                          |
| 21:37860785  | <i>DYRK1A</i>       | REACTOME_CELL_CELL_COMMUNICATION                          |
| 21:37894089  | <i>DYRK1A</i>       | REACTOME_CELL_CELL_COMMUNICATION                          |
| 21:37899076  | <i>DYRK1A</i>       | REACTOME_CELL_CELL_COMMUNICATION                          |
| 17:39883520  | <i>RETREG3</i>      | REACTOME_CELL_CELL_JUNCTION_ORGANIZATION                  |
| 21:37854286  | <i>DYRK1A</i>       | REACTOME_CELL_CELL_JUNCTION_ORGANIZATION                  |
| 21:37859449  | <i>DYRK1A</i>       | REACTOME_CELL_CELL_JUNCTION_ORGANIZATION                  |
| 21:37860785  | <i>DYRK1A</i>       | REACTOME_CELL_CELL_JUNCTION_ORGANIZATION                  |
| 21:37894089  | <i>DYRK1A</i>       | REACTOME_CELL_CELL_JUNCTION_ORGANIZATION                  |
| 21:37899076  | <i>DYRK1A</i>       | REACTOME_CELL_CELL_JUNCTION_ORGANIZATION                  |
| 2:169747216  | <i>STK39</i>        | REACTOME_CELL_CYCLE_CHECKPOINTS                           |
| 3:48199695   | <i>IP6K2</i>        | REACTOME_CELL_CYCLE_CHECKPOINTS                           |
| 3:48214438   | <i>IP6K2</i>        | REACTOME_CELL_CYCLE_CHECKPOINTS                           |
| 5:133558885  | <i>C5orf24</i>      | REACTOME_CELL_CYCLE_CHECKPOINTS                           |
| 12:122816734 | <i>HIP1R</i>        | REACTOME_CELL_CYCLE_CHECKPOINTS                           |
| 12:122817580 | <i>HIP1R</i>        | REACTOME_CELL_CYCLE_CHECKPOINTS                           |
| 12:122853197 | <i>HIP1R</i>        | REACTOME_CELL_CYCLE_CHECKPOINTS                           |
| 12:123057792 | <i>HIP1R</i>        | REACTOME_CELL_CYCLE_CHECKPOINTS                           |
| 12:123110365 | <i>HIP1R</i>        | REACTOME_CELL_CYCLE_CHECKPOINTS                           |
| 12:123110785 | <i>HIP1R</i>        | REACTOME_CELL_CYCLE_CHECKPOINTS                           |
| 17:7578671   | <i>V1NB1</i>        | REACTOME_CELL_CYCLE_CHECKPOINTS                           |
| 17:45215865  | <i>WNT3</i>         | REACTOME_CELL_CYCLE_CHECKPOINTS                           |
| 17:45244822  | <i>WNT3</i>         | REACTOME_CELL_CYCLE_CHECKPOINTS                           |
| 17:59791813  | <i>BRIP1</i>        | REACTOME_CELL_CYCLE_CHECKPOINTS                           |
| 17:59922925  | <i>BRIP1</i>        | REACTOME_CELL_CYCLE_CHECKPOINTS                           |
| 20:5934513   | <i>CRLS1</i>        | REACTOME_CELL_CYCLE_CHECKPOINTS                           |
| 20:5935522   | <i>CRLS1</i>        | REACTOME_CELL_CYCLE_CHECKPOINTS                           |
| 20:5968737   | <i>CRLS1</i>        | REACTOME_CELL_CYCLE_CHECKPOINTS                           |
| 20:5968964   | <i>CRLS1</i>        | REACTOME_CELL_CYCLE_CHECKPOINTS                           |
| 1:156059276  | <i>GBAP1</i>        | REACTOME_CELL_CYCLE_MITOTIC                               |
| 1:226497419  | <i>ITPKB</i>        | REACTOME_CELL_CYCLE_MITOTIC                               |
| 2:169747216  | <i>STK39</i>        | REACTOME_CELL_CYCLE_MITOTIC                               |
| 3:48199695   | <i>IP6K2</i>        | REACTOME_CELL_CYCLE_MITOTIC                               |
| 3:48214438   | <i>IP6K2</i>        | REACTOME_CELL_CYCLE_MITOTIC                               |
| 4:76695927   | <i>FAM47E-STBD1</i> | REACTOME_CELL_CYCLE_MITOTIC                               |
| 5:133558885  | <i>C5orf24</i>      | REACTOME_CELL_CYCLE_MITOTIC                               |

|              |                     |                             |
|--------------|---------------------|-----------------------------|
| 10:103185542 | <i>GBF1</i>         | REACTOME_CELL_CYCLE_MITOTIC |
| 10:103305087 | <i>GBF1</i>         | REACTOME_CELL_CYCLE_MITOTIC |
| 10:103308244 | <i>GBF1</i>         | REACTOME_CELL_CYCLE_MITOTIC |
| 10:104258303 | <i>GBF1</i>         | REACTOME_CELL_CYCLE_MITOTIC |
| 12:122816734 | <i>HIP1R</i>        | REACTOME_CELL_CYCLE_MITOTIC |
| 12:122817580 | <i>HIP1R</i>        | REACTOME_CELL_CYCLE_MITOTIC |
| 12:122853197 | <i>HIP1R</i>        | REACTOME_CELL_CYCLE_MITOTIC |
| 12:123057792 | <i>HIP1R</i>        | REACTOME_CELL_CYCLE_MITOTIC |
| 12:123110365 | <i>HIP1R</i>        | REACTOME_CELL_CYCLE_MITOTIC |
| 12:123110785 | <i>HIP1R</i>        | REACTOME_CELL_CYCLE_MITOTIC |
| 12:133206648 | <i>FBRSL1</i>       | REACTOME_CELL_CYCLE_MITOTIC |
| 12:133223685 | <i>FBRSL1</i>       | REACTOME_CELL_CYCLE_MITOTIC |
| 14:74640180  | <i>RPS6KL1</i>      | REACTOME_CELL_CYCLE_MITOTIC |
| 16:19562008  | <i>SYT17</i>        | REACTOME_CELL_CYCLE_MITOTIC |
| 17:7578671   | <i>V1NB1</i>        | REACTOME_CELL_CYCLE_MITOTIC |
| 17:40818584  | <i>RETREG3</i>      | REACTOME_CELL_CYCLE_MITOTIC |
| 17:45215865  | <i>WNT3</i>         | REACTOME_CELL_CYCLE_MITOTIC |
| 17:45244822  | <i>WNT3</i>         | REACTOME_CELL_CYCLE_MITOTIC |
| 17:76177567  | <i>DNAH17</i>       | REACTOME_CELL_CYCLE_MITOTIC |
| 20:5934513   | <i>CRSL1</i>        | REACTOME_CELL_CYCLE_MITOTIC |
| 20:5935522   | <i>CRSL1</i>        | REACTOME_CELL_CYCLE_MITOTIC |
| 20:5968737   | <i>CRSL1</i>        | REACTOME_CELL_CYCLE_MITOTIC |
| 20:5968964   | <i>CRSL1</i>        | REACTOME_CELL_CYCLE_MITOTIC |
| 21:38740824  | <i>DYRK1A</i>       | REACTOME_CELL_CYCLE_MITOTIC |
| 21:38753354  | <i>DYRK1A</i>       | REACTOME_CELL_CYCLE_MITOTIC |
| 21:38770530  | <i>DYRK1A</i>       | REACTOME_CELL_CYCLE_MITOTIC |
| 21:38783614  | <i>DYRK1A</i>       | REACTOME_CELL_CYCLE_MITOTIC |
| 21:38814867  | <i>DYRK1A</i>       | REACTOME_CELL_CYCLE_MITOTIC |
| 1:156059276  | <i>GBAP1</i>        | REACTOME_CELL_CYCLE         |
| 1:226497419  | <i>ITPKB</i>        | REACTOME_CELL_CYCLE         |
| 2:169747216  | <i>STK39</i>        | REACTOME_CELL_CYCLE         |
| 3:48199695   | <i>IP6K2</i>        | REACTOME_CELL_CYCLE         |
| 3:48214438   | <i>IP6K2</i>        | REACTOME_CELL_CYCLE         |
| 4:76695927   | <i>FAM47E-STBD1</i> | REACTOME_CELL_CYCLE         |
| 5:133558885  | <i>C5orf24</i>      | REACTOME_CELL_CYCLE         |
| 6:31716436   | <i>HLA-DRB5</i>     | REACTOME_CELL_CYCLE         |
| 10:103185542 | <i>GBF1</i>         | REACTOME_CELL_CYCLE         |
| 10:103305087 | <i>GBF1</i>         | REACTOME_CELL_CYCLE         |
| 10:103308244 | <i>GBF1</i>         | REACTOME_CELL_CYCLE         |
| 10:104258303 | <i>GBF1</i>         | REACTOME_CELL_CYCLE         |
| 12:122816734 | <i>HIP1R</i>        | REACTOME_CELL_CYCLE         |
| 12:122817580 | <i>HIP1R</i>        | REACTOME_CELL_CYCLE         |
| 12:122853197 | <i>HIP1R</i>        | REACTOME_CELL_CYCLE         |
| 12:123057792 | <i>HIP1R</i>        | REACTOME_CELL_CYCLE         |
| 12:123110365 | <i>HIP1R</i>        | REACTOME_CELL_CYCLE         |
| 12:123110785 | <i>HIP1R</i>        | REACTOME_CELL_CYCLE         |
| 12:133206648 | <i>FBRSL1</i>       | REACTOME_CELL_CYCLE         |
| 12:133223685 | <i>FBRSL1</i>       | REACTOME_CELL_CYCLE         |
| 14:74640180  | <i>RPS6KL1</i>      | REACTOME_CELL_CYCLE         |
| 14:75495059  | <i>RPS6KL1</i>      | REACTOME_CELL_CYCLE         |
| 16:19562008  | <i>SYT17</i>        | REACTOME_CELL_CYCLE         |
| 17:40818584  | <i>RETREG3</i>      | REACTOME_CELL_CYCLE         |
| 17:45215865  | <i>WNT3</i>         | REACTOME_CELL_CYCLE         |

|              |          |                                                         |
|--------------|----------|---------------------------------------------------------|
| 17:45244822  | WNT3     | REACTOME_CELL_CYCLE                                     |
| 17:59791813  | BRIP1    | REACTOME_CELL_CYCLE                                     |
| 17:59922925  | BRIP1    | REACTOME_CELL_CYCLE                                     |
| 17:76177567  | DNAH17   | REACTOME_CELL_CYCLE                                     |
| 20:5934513   | CRLS1    | REACTOME_CELL_CYCLE                                     |
| 20:5935522   | CRLS1    | REACTOME_CELL_CYCLE                                     |
| 20:5968737   | CRLS1    | REACTOME_CELL_CYCLE                                     |
| 20:5968964   | CRLS1    | REACTOME_CELL_CYCLE                                     |
| 21:38740824  | DYRK1A   | REACTOME_CELL_CYCLE                                     |
| 21:38753354  | DYRK1A   | REACTOME_CELL_CYCLE                                     |
| 21:38770530  | DYRK1A   | REACTOME_CELL_CYCLE                                     |
| 21:38783614  | DYRK1A   | REACTOME_CELL_CYCLE                                     |
| 21:38814867  | DYRK1A   | REACTOME_CELL_CYCLE                                     |
| 1:155975202  | GBAP1    | REACTOME_CELL_DEATH_SIGNALLING_VIA_NRAGE_NRIF_AND_NADE  |
| 1:227067656  | ITPKB    | REACTOME_CELL_DEATH_SIGNALLING_VIA_NRAGE_NRIF_AND_NADE  |
| 17:39883520  | RETREG3  | REACTOME_CELL_JUNCTION_ORGANIZATION                     |
| 21:37854286  | DYRK1A   | REACTOME_CELL_JUNCTION_ORGANIZATION                     |
| 21:37859449  | DYRK1A   | REACTOME_CELL_JUNCTION_ORGANIZATION                     |
| 21:37860785  | DYRK1A   | REACTOME_CELL_JUNCTION_ORGANIZATION                     |
| 21:37894089  | DYRK1A   | REACTOME_CELL_JUNCTION_ORGANIZATION                     |
| 21:37899076  | DYRK1A   | REACTOME_CELL_JUNCTION_ORGANIZATION                     |
| 6:112137847  | FYN      | REACTOME_CELL_SURFACE_INTERACTIONS_AT_THE_VASCULAR_WALL |
| 6:112151452  | FYN      | REACTOME_CELL_SURFACE_INTERACTIONS_AT_THE_VASCULAR_WALL |
| 6:112175069  | FYN      | REACTOME_CELL_SURFACE_INTERACTIONS_AT_THE_VASCULAR_WALL |
| 8:23050400   | BIN3     | REACTOME_CELL_SURFACE_INTERACTIONS_AT_THE_VASCULAR_WALL |
| 11:133947732 | IGSF9B   | REACTOME_CELL_SURFACE_INTERACTIONS_AT_THE_VASCULAR_WALL |
| 16:30510571  | SETD1A   | REACTOME_CELL_SURFACE_INTERACTIONS_AT_THE_VASCULAR_WALL |
| 16:30516492  | SETD1A   | REACTOME_CELL_SURFACE_INTERACTIONS_AT_THE_VASCULAR_WALL |
| 16:30520856  | SETD1A   | REACTOME_CELL_SURFACE_INTERACTIONS_AT_THE_VASCULAR_WALL |
| 16:31370452  | SETD1A   | REACTOME_CELL_SURFACE_INTERACTIONS_AT_THE_VASCULAR_WALL |
| 17:7560294   | V1NB1    | REACTOME_CELL_SURFACE_INTERACTIONS_AT_THE_VASCULAR_WALL |
| 2:102357447  | MAP4K4   | REACTOME_CELLULAR_RESPONSES_TO_EXTERNAL_STIMULI         |
| 2:102379173  | MAP4K4   | REACTOME_CELLULAR_RESPONSES_TO_EXTERNAL_STIMULI         |
| 2:102413116  | MAP4K4   | REACTOME_CELLULAR_RESPONSES_TO_EXTERNAL_STIMULI         |
| 4:114424939  | CAMK2D   | REACTOME_CELLULAR_RESPONSES_TO_EXTERNAL_STIMULI         |
| 4:114494052  | CAMK2D   | REACTOME_CELLULAR_RESPONSES_TO_EXTERNAL_STIMULI         |
| 4:114529492  | CAMK2D   | REACTOME_CELLULAR_RESPONSES_TO_EXTERNAL_STIMULI         |
| 4:114539964  | CAMK2D   | REACTOME_CELLULAR_RESPONSES_TO_EXTERNAL_STIMULI         |
| 4:114597918  | CAMK2D   | REACTOME_CELLULAR_RESPONSES_TO_EXTERNAL_STIMULI         |
| 6:31862876   | HLA-DRB5 | REACTOME_CELLULAR_RESPONSES_TO_EXTERNAL_STIMULI         |
| 9:34342881   | UBAP2    | REACTOME_CELLULAR_RESPONSES_TO_EXTERNAL_STIMULI         |
| 10:14908849  | ITGA8    | REACTOME_CELLULAR_RESPONSES_TO_EXTERNAL_STIMULI         |
| 10:104258303 | GBF1     | REACTOME_CELLULAR_RESPONSES_TO_EXTERNAL_STIMULI         |
| 10:121429633 | INPP5F   | REACTOME_CELLULAR_RESPONSES_TO_EXTERNAL_STIMULI         |
| 10:121437329 | INPP5F   | REACTOME_CELLULAR_RESPONSES_TO_EXTERNAL_STIMULI         |
| 12:133295501 | FBRSL1   | REACTOME_CELLULAR_RESPONSES_TO_EXTERNAL_STIMULI         |
| 14:55871532  | GCH1     | REACTOME_CELLULAR_RESPONSES_TO_EXTERNAL_STIMULI         |
| 17:7578671   | V1NB1    | REACTOME_CELLULAR_RESPONSES_TO_EXTERNAL_STIMULI         |
| 17:40132591  | RETREG3  | REACTOME_CELLULAR_RESPONSES_TO_EXTERNAL_STIMULI         |
| 17:45215865  | WNT3     | REACTOME_CELLULAR_RESPONSES_TO_EXTERNAL_STIMULI         |
| 17:45244822  | WNT3     | REACTOME_CELLULAR_RESPONSES_TO_EXTERNAL_STIMULI         |
| 2:102357447  | MAP4K4   | REACTOME_CELLULAR_RESPONSES_TO_STRESS                   |
| 2:102379173  | MAP4K4   | REACTOME_CELLULAR_RESPONSES_TO_STRESS                   |

|              |              |                                                          |
|--------------|--------------|----------------------------------------------------------|
| 2:102413116  | MAP4K4       | REACTOME_CELLULAR_RESPONSES_TO_STRESS                    |
| 4:114424939  | CAMK2D       | REACTOME_CELLULAR_RESPONSES_TO_STRESS                    |
| 4:114494052  | CAMK2D       | REACTOME_CELLULAR_RESPONSES_TO_STRESS                    |
| 4:114529492  | CAMK2D       | REACTOME_CELLULAR_RESPONSES_TO_STRESS                    |
| 4:114539964  | CAMK2D       | REACTOME_CELLULAR_RESPONSES_TO_STRESS                    |
| 4:114597918  | CAMK2D       | REACTOME_CELLULAR_RESPONSES_TO_STRESS                    |
| 6:31862876   | HLA-DRB5     | REACTOME_CELLULAR_RESPONSES_TO_STRESS                    |
| 9:34342881   | UBAP2        | REACTOME_CELLULAR_RESPONSES_TO_STRESS                    |
| 10:14908849  | ITGA8        | REACTOME_CELLULAR_RESPONSES_TO_STRESS                    |
| 10:104258303 | GBF1         | REACTOME_CELLULAR_RESPONSES_TO_STRESS                    |
| 10:121429633 | INPP5F       | REACTOME_CELLULAR_RESPONSES_TO_STRESS                    |
| 10:121437329 | INPP5F       | REACTOME_CELLULAR_RESPONSES_TO_STRESS                    |
| 17:7578671   | V1NB1        | REACTOME_CELLULAR_RESPONSES_TO_STRESS                    |
| 17:40132591  | RETREG3      | REACTOME_CELLULAR_RESPONSES_TO_STRESS                    |
| 17:45215865  | WNT3         | REACTOME_CELLULAR_RESPONSES_TO_STRESS                    |
| 17:45244822  | WNT3         | REACTOME_CELLULAR_RESPONSES_TO_STRESS                    |
| 4:114424939  | CAMK2D       | REACTOME_CELLULAR_RESPONSE_TO_HEAT_STRESS                |
| 4:114494052  | CAMK2D       | REACTOME_CELLULAR_RESPONSE_TO_HEAT_STRESS                |
| 4:114529492  | CAMK2D       | REACTOME_CELLULAR_RESPONSE_TO_HEAT_STRESS                |
| 4:114539964  | CAMK2D       | REACTOME_CELLULAR_RESPONSE_TO_HEAT_STRESS                |
| 4:114597918  | CAMK2D       | REACTOME_CELLULAR_RESPONSE_TO_HEAT_STRESS                |
| 10:14908849  | ITGA8        | REACTOME_CELLULAR_RESPONSE_TO_HEAT_STRESS                |
| 10:121429633 | INPP5F       | REACTOME_CELLULAR_RESPONSE_TO_HEAT_STRESS                |
| 10:121437329 | INPP5F       | REACTOME_CELLULAR_RESPONSE_TO_HEAT_STRESS                |
| 17:40132591  | RETREG3      | REACTOME_CELLULAR_RESPONSE_TO_HEAT_STRESS                |
| 2:102357447  | MAP4K4       | REACTOME_CELLULAR_SENESCENCE                             |
| 2:102379173  | MAP4K4       | REACTOME_CELLULAR_SENESCENCE                             |
| 2:102413116  | MAP4K4       | REACTOME_CELLULAR_SENESCENCE                             |
| 6:31862876   | HLA-DRB5     | REACTOME_CELLULAR_SENESCENCE                             |
| 17:7578671   | V1NB1        | REACTOME_CELLULAR_SENESCENCE                             |
| 17:45215865  | WNT3         | REACTOME_CELLULAR_SENESCENCE                             |
| 17:45244822  | WNT3         | REACTOME_CELLULAR_SENESCENCE                             |
| 10:104258303 | GBF1         | REACTOME_CENTROSOME_MATURATION                           |
| 16:19562008  | SYT17        | REACTOME_CENTROSOME_MATURATION                           |
| 17:40818584  | RETREG3      | REACTOME_CENTROSOME_MATURATION                           |
| 11:10647977  | RNF141       | REACTOME_CGMP_EFFECTS                                    |
| 11:10648481  | RNF141       | REACTOME_CGMP_EFFECTS                                    |
| 11:10660840  | RNF141       | REACTOME_CGMP_EFFECTS                                    |
| 17:42990894  | CRHR1_2      | REACTOME_CHAPERONE_MEDIATED_AUTOPHAGY                    |
| 4:76924571   | FAM47E-STBD1 | REACTOME_CHEMOKINE_RECEPTORS_BIND_CHEMOKINES             |
| 8:11679472   | CTSB         | REACTOME_CHOLESTEROL_BIOSYNTHESIS                        |
| 6:71594785   | RIMS1        | REACTOME_CHONDROITIN_SULFATE_DERMATAN_SULFATE_METABOLISM |
| 11:134255325 | IGSF9B       | REACTOME_CHONDROITIN_SULFATE_DERMATAN_SULFATE_METABOLISM |
| 1:155359992  | GBAP1        | REACTOME_CHROMATIN_ORGANIZATION                          |
| 3:183427301  | MCCC1        | REACTOME_CHROMATIN_ORGANIZATION                          |
| 5:133910742  | C5orf24      | REACTOME_CHROMATIN_ORGANIZATION                          |
| 6:31862876   | HLA-DRB5     | REACTOME_CHROMATIN_ORGANIZATION                          |
| 12:46134812  | SCAF11       | REACTOME_CHROMATIN_ORGANIZATION                          |
| 12:46206268  | SCAF11       | REACTOME_CHROMATIN_ORGANIZATION                          |
| 17:7155861   | V1NB1        | REACTOME_CHROMATIN_ORGANIZATION                          |
| 17:44160410  | WNT3         | REACTOME_CHROMATIN_ORGANIZATION                          |
| 17:44189067  | WNT3         | REACTOME_CHROMATIN_ORGANIZATION                          |
| 19:2172266   | SPPL2B       | REACTOME_CHROMATIN_ORGANIZATION                          |

|              |                     |                                             |
|--------------|---------------------|---------------------------------------------|
| 19:2202252   | <i>SPPL2B</i>       | REACTOME_CHROMATIN_ORGANIZATION             |
| 12:133206648 | <i>FBRSL1</i>       | REACTOME_CHROMOSOME_MAINTENANCE             |
| 12:133223685 | <i>FBRSL1</i>       | REACTOME_CHROMOSOME_MAINTENANCE             |
| 3:121553904  | <i>KPNA1</i>        | REACTOME_CILIUM_ASSEMBLY                    |
| 4:15492268   | <i>BST1</i>         | REACTOME_CILIUM_ASSEMBLY                    |
| 4:15547513   | <i>BST1</i>         | REACTOME_CILIUM_ASSEMBLY                    |
| 6:30601232   | <i>TRIM40</i>       | REACTOME_CILIUM_ASSEMBLY                    |
| 6:30612107   | <i>TRIM40</i>       | REACTOME_CILIUM_ASSEMBLY                    |
| 8:131145058  | <i>FAM49B</i>       | REACTOME_CILIUM_ASSEMBLY                    |
| 8:131153067  | <i>FAM49B</i>       | REACTOME_CILIUM_ASSEMBLY                    |
| 8:131245821  | <i>FAM49B</i>       | REACTOME_CILIUM_ASSEMBLY                    |
| 8:131328260  | <i>FAM49B</i>       | REACTOME_CILIUM_ASSEMBLY                    |
| 8:131404984  | <i>FAM49B</i>       | REACTOME_CILIUM_ASSEMBLY                    |
| 8:131408202  | <i>FAM49B</i>       | REACTOME_CILIUM_ASSEMBLY                    |
| 8:131455469  | <i>FAM49B</i>       | REACTOME_CILIUM_ASSEMBLY                    |
| 9:34300212   | <i>UBAP2</i>        | REACTOME_CILIUM_ASSEMBLY                    |
| 10:104005410 | <i>GBF1</i>         | REACTOME_CILIUM_ASSEMBLY                    |
| 10:104034550 | <i>GBF1</i>         | REACTOME_CILIUM_ASSEMBLY                    |
| 10:104258303 | <i>GBF1</i>         | REACTOME_CILIUM_ASSEMBLY                    |
| 10:104443875 | <i>GBF1</i>         | REACTOME_CILIUM_ASSEMBLY                    |
| 10:104452818 | <i>GBF1</i>         | REACTOME_CILIUM_ASSEMBLY                    |
| 16:19562008  | <i>SYT17</i>        | REACTOME_CILIUM_ASSEMBLY                    |
| 2:101439596  | <i>MAP4K4</i>       | REACTOME_CIRCADIAN_CLOCK                    |
| 2:101464631  | <i>MAP4K4</i>       | REACTOME_CIRCADIAN_CLOCK                    |
| 2:101547064  | <i>MAP4K4</i>       | REACTOME_CIRCADIAN_CLOCK                    |
| 2:101550181  | <i>MAP4K4</i>       | REACTOME_CIRCADIAN_CLOCK                    |
| 2:101578010  | <i>MAP4K4</i>       | REACTOME_CIRCADIAN_CLOCK                    |
| 2:101603812  | <i>MAP4K4</i>       | REACTOME_CIRCADIAN_CLOCK                    |
| 10:103185542 | <i>GBF1</i>         | REACTOME_CIRCADIAN_CLOCK                    |
| 10:103305087 | <i>GBF1</i>         | REACTOME_CIRCADIAN_CLOCK                    |
| 10:103308244 | <i>GBF1</i>         | REACTOME_CIRCADIAN_CLOCK                    |
| 15:61016235  | <i>VPS13C</i>       | REACTOME_CIRCADIAN_CLOCK                    |
| 15:61065568  | <i>VPS13C</i>       | REACTOME_CIRCADIAN_CLOCK                    |
| 15:61094298  | <i>VPS13C</i>       | REACTOME_CIRCADIAN_CLOCK                    |
| 15:61140736  | <i>VPS13C</i>       | REACTOME_CIRCADIAN_CLOCK                    |
| 15:61142062  | <i>VPS13C</i>       | REACTOME_CIRCADIAN_CLOCK                    |
| 15:61162571  | <i>VPS13C</i>       | REACTOME_CIRCADIAN_CLOCK                    |
| 15:61191617  | <i>VPS13C</i>       | REACTOME_CIRCADIAN_CLOCK                    |
| 15:61195427  | <i>VPS13C</i>       | REACTOME_CIRCADIAN_CLOCK                    |
| 15:61221682  | <i>VPS13C</i>       | REACTOME_CIRCADIAN_CLOCK                    |
| 15:61298486  | <i>VPS13C</i>       | REACTOME_CIRCADIAN_CLOCK                    |
| 15:61375480  | <i>VPS13C</i>       | REACTOME_CIRCADIAN_CLOCK                    |
| 15:61434581  | <i>VPS13C</i>       | REACTOME_CIRCADIAN_CLOCK                    |
| 15:61467078  | <i>VPS13C</i>       | REACTOME_CIRCADIAN_CLOCK                    |
| 15:61470808  | <i>VPS13C</i>       | REACTOME_CIRCADIAN_CLOCK                    |
| 15:61500263  | <i>VPS13C</i>       | REACTOME_CIRCADIAN_CLOCK                    |
| 3:150935203  | <i>MED12L</i>       | REACTOME_CLASS_A_1_RHODOPSIN_LIKE_RECEPTORS |
| 3:151090424  | <i>MED12L</i>       | REACTOME_CLASS_A_1_RHODOPSIN_LIKE_RECEPTORS |
| 3:151099733  | <i>MED12L</i>       | REACTOME_CLASS_A_1_RHODOPSIN_LIKE_RECEPTORS |
| 4:76924571   | <i>FAM47E-STBD1</i> | REACTOME_CLASS_A_1_RHODOPSIN_LIKE_RECEPTORS |
| 12:123110365 | <i>HIP1R</i>        | REACTOME_CLASS_A_1_RHODOPSIN_LIKE_RECEPTORS |
| 12:123110785 | <i>HIP1R</i>        | REACTOME_CLASS_A_1_RHODOPSIN_LIKE_RECEPTORS |
| 12:123139394 | <i>HIP1R</i>        | REACTOME_CLASS_A_1_RHODOPSIN_LIKE_RECEPTORS |

|              |                     |                                                               |
|--------------|---------------------|---------------------------------------------------------------|
| 12:123155263 | <i>HIP1R</i>        | REACTOME_CLASS_A_1_RHODOPSIN_LIKE_RECEPTORS                   |
| 12:123165949 | <i>HIP1R</i>        | REACTOME_CLASS_A_1_RHODOPSIN_LIKE_RECEPTORS                   |
| 12:123194636 | <i>HIP1R</i>        | REACTOME_CLASS_A_1_RHODOPSIN_LIKE_RECEPTORS                   |
| 14:88472612  | <i>GALC</i>         | REACTOME_CLASS_A_1_RHODOPSIN_LIKE_RECEPTORS                   |
| 20:5290081   | <i>CRLS1</i>        | REACTOME_CLASS_A_1_RHODOPSIN_LIKE_RECEPTORS                   |
| 17:43744203  | <i>CRHR1_2</i>      | REACTOME_CLASS_B_2_SECRETIN_FAMILY_RECEPTORS                  |
| 17:43748712  | <i>CRHR1_2</i>      | REACTOME_CLASS_B_2_SECRETIN_FAMILY_RECEPTORS                  |
| 17:43784228  | <i>CRHR1_2</i>      | REACTOME_CLASS_B_2_SECRETIN_FAMILY_RECEPTORS                  |
| 17:43791502  | <i>CRHR1_2</i>      | REACTOME_CLASS_B_2_SECRETIN_FAMILY_RECEPTORS                  |
| 17:43796210  | <i>CRHR1_2</i>      | REACTOME_CLASS_B_2_SECRETIN_FAMILY_RECEPTORS                  |
| 17:43843861  | <i>CRHR1_2</i>      | REACTOME_CLASS_B_2_SECRETIN_FAMILY_RECEPTORS                  |
| 17:43847503  | <i>CRHR1_2</i>      | REACTOME_CLASS_B_2_SECRETIN_FAMILY_RECEPTORS                  |
| 17:43849514  | <i>CRHR1_2</i>      | REACTOME_CLASS_B_2_SECRETIN_FAMILY_RECEPTORS                  |
| 17:44843651  | <i>WNT3</i>         | REACTOME_CLASS_B_2_SECRETIN_FAMILY_RECEPTORS                  |
| 17:44870978  | <i>WNT3</i>         | REACTOME_CLASS_B_2_SECRETIN_FAMILY_RECEPTORS                  |
| 17:44871422  | <i>WNT3</i>         | REACTOME_CLASS_B_2_SECRETIN_FAMILY_RECEPTORS                  |
| 17:44888209  | <i>WNT3</i>         | REACTOME_CLASS_B_2_SECRETIN_FAMILY_RECEPTORS                  |
| 17:44888715  | <i>WNT3</i>         | REACTOME_CLASS_B_2_SECRETIN_FAMILY_RECEPTORS                  |
| 17:44906949  | <i>WNT3</i>         | REACTOME_CLASS_B_2_SECRETIN_FAMILY_RECEPTORS                  |
| 17:44912901  | <i>WNT3</i>         | REACTOME_CLASS_B_2_SECRETIN_FAMILY_RECEPTORS                  |
| 17:44931399  | <i>WNT3</i>         | REACTOME_CLASS_B_2_SECRETIN_FAMILY_RECEPTORS                  |
| 17:44947756  | <i>WNT3</i>         | REACTOME_CLASS_B_2_SECRETIN_FAMILY_RECEPTORS                  |
| 19:2557113   | <i>SPPL2B</i>       | REACTOME_CLASS_B_2_SECRETIN_FAMILY_RECEPTORS                  |
| 19:2563327   | <i>SPPL2B</i>       | REACTOME_CLASS_B_2_SECRETIN_FAMILY_RECEPTORS                  |
| 19:2580057   | <i>SPPL2B</i>       | REACTOME_CLASS_B_2_SECRETIN_FAMILY_RECEPTORS                  |
| 19:2660983   | <i>SPPL2B</i>       | REACTOME_CLASS_B_2_SECRETIN_FAMILY_RECEPTORS                  |
| 6:29565889   | <i>TRIM40</i>       | REACTOME_CLASS_C_3_METABOTROPIC_GLUTAMATE_PHEROMONE_RECEPTORS |
| 6:29590715   | <i>TRIM40</i>       | REACTOME_CLASS_C_3_METABOTROPIC_GLUTAMATE_PHEROMONE_RECEPTORS |
| 3:49740895   | <i>IP6K2</i>        | REACTOME_CLASS_I_MHC_MEDIATED_ANTIGEN_PROCESSING_PRESENTATION |
| 3:121319489  | <i>KPNA1</i>        | REACTOME_CLASS_I_MHC_MEDIATED_ANTIGEN_PROCESSING_PRESENTATION |
| 3:121324643  | <i>KPNA1</i>        | REACTOME_CLASS_I_MHC_MEDIATED_ANTIGEN_PROCESSING_PRESENTATION |
| 3:121340955  | <i>KPNA1</i>        | REACTOME_CLASS_I_MHC_MEDIATED_ANTIGEN_PROCESSING_PRESENTATION |
| 3:122289921  | <i>KPNA1</i>        | REACTOME_CLASS_I_MHC_MEDIATED_ANTIGEN_PROCESSING_PRESENTATION |
| 4:15608677   | <i>BST1</i>         | REACTOME_CLASS_I_MHC_MEDIATED_ANTIGEN_PROCESSING_PRESENTATION |
| 4:15618898   | <i>BST1</i>         | REACTOME_CLASS_I_MHC_MEDIATED_ANTIGEN_PROCESSING_PRESENTATION |
| 4:76407998   | <i>FAM47E-STBD1</i> | REACTOME_CLASS_I_MHC_MEDIATED_ANTIGEN_PROCESSING_PRESENTATION |
| 4:170015977  | <i>CLCN3</i>        | REACTOME_CLASS_I_MHC_MEDIATED_ANTIGEN_PROCESSING_PRESENTATION |
| 4:170031333  | <i>CLCN3</i>        | REACTOME_CLASS_I_MHC_MEDIATED_ANTIGEN_PROCESSING_PRESENTATION |
| 4:170101917  | <i>CLCN3</i>        | REACTOME_CLASS_I_MHC_MEDIATED_ANTIGEN_PROCESSING_PRESENTATION |
| 4:170161031  | <i>CLCN3</i>        | REACTOME_CLASS_I_MHC_MEDIATED_ANTIGEN_PROCESSING_PRESENTATION |
| 5:133710339  | <i>C5orf24</i>      | REACTOME_CLASS_I_MHC_MEDIATED_ANTIGEN_PROCESSING_PRESENTATION |
| 6:29798642   | <i>TRIM40</i>       | REACTOME_CLASS_I_MHC_MEDIATED_ANTIGEN_PROCESSING_PRESENTATION |
| 6:32789400   | <i>HLA-DRB5</i>     | REACTOME_CLASS_I_MHC_MEDIATED_ANTIGEN_PROCESSING_PRESENTATION |
| 6:32791831   | <i>HLA-DRB5</i>     | REACTOME_CLASS_I_MHC_MEDIATED_ANTIGEN_PROCESSING_PRESENTATION |
| 6:32797361   | <i>HLA-DRB5</i>     | REACTOME_CLASS_I_MHC_MEDIATED_ANTIGEN_PROCESSING_PRESENTATION |
| 6:32802462   | <i>HLA-DRB5</i>     | REACTOME_CLASS_I_MHC_MEDIATED_ANTIGEN_PROCESSING_PRESENTATION |
| 7:66096028   | <i>GS1-124K5.11</i> | REACTOME_CLASS_I_MHC_MEDIATED_ANTIGEN_PROCESSING_PRESENTATION |
| 7:66136281   | <i>GS1-124K5.11</i> | REACTOME_CLASS_I_MHC_MEDIATED_ANTIGEN_PROCESSING_PRESENTATION |
| 9:33845203   | <i>UBAP2</i>        | REACTOME_CLASS_I_MHC_MEDIATED_ANTIGEN_PROCESSING_PRESENTATION |
| 10:103185542 | <i>GBF1</i>         | REACTOME_CLASS_I_MHC_MEDIATED_ANTIGEN_PROCESSING_PRESENTATION |
| 10:103305087 | <i>GBF1</i>         | REACTOME_CLASS_I_MHC_MEDIATED_ANTIGEN_PROCESSING_PRESENTATION |
| 10:103308244 | <i>GBF1</i>         | REACTOME_CLASS_I_MHC_MEDIATED_ANTIGEN_PROCESSING_PRESENTATION |
| 17:45215865  | <i>WNT3</i>         | REACTOME_CLASS_I_MHC_MEDIATED_ANTIGEN_PROCESSING_PRESENTATION |

|              |              |                                                                     |
|--------------|--------------|---------------------------------------------------------------------|
| 17:45244822  | WNT3         | REACTOME_CLASS_I_MHC_MEDIATED_ANTIGEN_PROCESSING_PRESENTATION       |
| 12:39960237  | LRRK2_2      | REACTOME_CLASS_I_PEROXISOMAL_MEMBRANE_PROTEIN_IMPORT                |
| 12:133295501 | FBRSL1       | REACTOME_CLASS_I_PEROXISOMAL_MEMBRANE_PROTEIN_IMPORT                |
| 1:155847427  | GBAP1        | REACTOME_CLATHRIN_MEDIATED_ENDOCYTOSIS                              |
| 1:171689486  | VAMP4        | REACTOME_CLATHRIN_MEDIATED_ENDOCYTOSIS                              |
| 1:171837985  | VAMP4        | REACTOME_CLATHRIN_MEDIATED_ENDOCYTOSIS                              |
| 1:171945488  | VAMP4        | REACTOME_CLATHRIN_MEDIATED_ENDOCYTOSIS                              |
| 1:172137119  | VAMP4        | REACTOME_CLATHRIN_MEDIATED_ENDOCYTOSIS                              |
| 1:172386261  | VAMP4        | REACTOME_CLATHRIN_MEDIATED_ENDOCYTOSIS                              |
| 2:170012307  | STK39        | REACTOME_CLATHRIN_MEDIATED_ENDOCYTOSIS                              |
| 2:170028024  | STK39        | REACTOME_CLATHRIN_MEDIATED_ENDOCYTOSIS                              |
| 2:170066424  | STK39        | REACTOME_CLATHRIN_MEDIATED_ENDOCYTOSIS                              |
| 4:925376     | GAK          | REACTOME_CLATHRIN_MEDIATED_ENDOCYTOSIS                              |
| 4:77104152   | FAM47E-STBD1 | REACTOME_CLATHRIN_MEDIATED_ENDOCYTOSIS                              |
| 4:77124196   | FAM47E-STBD1 | REACTOME_CLATHRIN_MEDIATED_ENDOCYTOSIS                              |
| 4:77134786   | FAM47E-STBD1 | REACTOME_CLATHRIN_MEDIATED_ENDOCYTOSIS                              |
| 9:17579690   | SH3GL2_2     | REACTOME_CLATHRIN_MEDIATED_ENDOCYTOSIS                              |
| 9:17587160   | SH3GL2_2     | REACTOME_CLATHRIN_MEDIATED_ENDOCYTOSIS                              |
| 9:17609302   | SH3GL2_2     | REACTOME_CLATHRIN_MEDIATED_ENDOCYTOSIS                              |
| 9:17626762   | SH3GL2_2     | REACTOME_CLATHRIN_MEDIATED_ENDOCYTOSIS                              |
| 9:17627444   | SH3GL2_2     | REACTOME_CLATHRIN_MEDIATED_ENDOCYTOSIS                              |
| 9:17642664   | SH3GL2_2     | REACTOME_CLATHRIN_MEDIATED_ENDOCYTOSIS                              |
| 9:17710876   | SH3GL2_2     | REACTOME_CLATHRIN_MEDIATED_ENDOCYTOSIS                              |
| 9:17732590   | SH3GL2_2     | REACTOME_CLATHRIN_MEDIATED_ENDOCYTOSIS                              |
| 9:17737514   | SH3GL2_2     | REACTOME_CLATHRIN_MEDIATED_ENDOCYTOSIS                              |
| 9:17758945   | SH3GL2_2     | REACTOME_CLATHRIN_MEDIATED_ENDOCYTOSIS                              |
| 12:123326598 | HIP1R        | REACTOME_CLATHRIN_MEDIATED_ENDOCYTOSIS                              |
| 17:7129974   | V1NB1        | REACTOME_CLATHRIN_MEDIATED_ENDOCYTOSIS                              |
| 10:103185542 | GBF1         | REACTOME_CLEC7A_DECTIN_1_SIGNALING                                  |
| 10:103305087 | GBF1         | REACTOME_CLEC7A_DECTIN_1_SIGNALING                                  |
| 10:103308244 | GBF1         | REACTOME_CLEC7A_DECTIN_1_SIGNALING                                  |
| 17:43390763  | CRHR1_2      | REACTOME_CLEC7A_DECTIN_1_SIGNALING                                  |
| 9:33791164   | UBAP2        | REACTOME_COBALAMIN_CBL_VITAMIN_B12_TRANSPORT_AND_METABOLISM         |
| 14:74764925  | RPS6KL1      | REACTOME_COBALAMIN_CBL_VITAMIN_B12_TRANSPORT_AND_METABOLISM         |
| 6:33153528   | HLA-DRB5     | REACTOME_COLLAGEN_BIOSYNTHESIS_AND_MODIFYING_ENZYMES                |
| 6:33153528   | HLA-DRB5     | REACTOME_COLLAGEN_CHAIN_TRIMERIZATION                               |
| 6:33153528   | HLA-DRB5     | REACTOME_COLLAGEN_DEGRADATION                                       |
| 8:11712443   | CTSB         | REACTOME_COLLAGEN_DEGRADATION                                       |
| 6:33153528   | HLA-DRB5     | REACTOME_COLLAGEN_FORMATION                                         |
| 8:11712443   | CTSB         | REACTOME_COLLAGEN_FORMATION                                         |
| 8:23190941   | BIN3         | REACTOME_COLLAGEN_FORMATION                                         |
| 8:23212542   | BIN3         | REACTOME_COLLAGEN_FORMATION                                         |
| 8:23216225   | BIN3         | REACTOME_COLLAGEN_FORMATION                                         |
| 8:23223713   | BIN3         | REACTOME_COLLAGEN_FORMATION                                         |
| 6:31895092   | HLA-DRB5     | REACTOME_COMPLEMENT_CASCADE                                         |
| 6:31897219   | HLA-DRB5     | REACTOME_COMPLEMENT_CASCADE                                         |
| 1:161171736  | FCGR2A       | REACTOME_COMPLEX_I_BIOGENESIS                                       |
| 5:60273923   | ELOVL7       | REACTOME_COMPLEX_I_BIOGENESIS                                       |
| 5:60288288   | ELOVL7       | REACTOME_COMPLEX_I_BIOGENESIS                                       |
| 6:112137847  | FYN          | REACTOME_CONSTITUTIVE_SIGNALING_BY_ABERRANT_PI3K_IN_CANCER          |
| 6:112151452  | FYN          | REACTOME_CONSTITUTIVE_SIGNALING_BY_ABERRANT_PI3K_IN_CANCER          |
| 6:112175069  | FYN          | REACTOME_CONSTITUTIVE_SIGNALING_BY_ABERRANT_PI3K_IN_CANCER          |
| 17:45215865  | WNT3         | REACTOME_CONVERSION_FROM_APC_C:CDK20_TO_APC_C:CDH1_IN_LATE_ANAPHASE |

|              |              |                                                                                           |
|--------------|--------------|-------------------------------------------------------------------------------------------|
| 17:45244822  | WNT3         | REACTOME_CONVERSION_FROM_APC_C:CD20_TO_APC_C:CDH1_IN_LATE_ANAPHASE                        |
| 19:2557113   | SPPL2B       | REACTOME_COOPERATION_OF_PDCL_PHL1_AND_TRIC_CCT_IN_G_PROTEIN_BETA_FOLDING                  |
| 19:2563327   | SPPL2B       | REACTOME_COOPERATION_OF_PDCL_PHL1_AND_TRIC_CCT_IN_G_PROTEIN_BETA_FOLDING                  |
| 19:2580057   | SPPL2B       | REACTOME_COOPERATION_OF_PDCL_PHL1_AND_TRIC_CCT_IN_G_PROTEIN_BETA_FOLDING                  |
| 19:2660983   | SPPL2B       | REACTOME_COOPERATION_OF_PDCL_PHL1_AND_TRIC_CCT_IN_G_PROTEIN_BETA_FOLDING                  |
| 10:104005410 | GBF1         | REACTOME_COPI_DEPENDENT_GOLGI_TO_ER_RETROGRADE_TRAFFIC                                    |
| 10:104034550 | GBF1         | REACTOME_COPI_DEPENDENT_GOLGI_TO_ER_RETROGRADE_TRAFFIC                                    |
| 12:39759090  | LRRK2_2      | REACTOME_COPI_DEPENDENT_GOLGI_TO_ER_RETROGRADE_TRAFFIC                                    |
| 12:39826709  | LRRK2_2      | REACTOME_COPI_DEPENDENT_GOLGI_TO_ER_RETROGRADE_TRAFFIC                                    |
| 17:43017194  | CRHR1_2      | REACTOME_COPI_DEPENDENT_GOLGI_TO_ER_RETROGRADE_TRAFFIC                                    |
| 17:43021962  | CRHR1_2      | REACTOME_COPI_DEPENDENT_GOLGI_TO_ER_RETROGRADE_TRAFFIC                                    |
| 17:44800946  | WNT3         | REACTOME_COPI_DEPENDENT_GOLGI_TO_ER_RETROGRADE_TRAFFIC                                    |
| 17:44833217  | WNT3         | REACTOME_COPI_DEPENDENT_GOLGI_TO_ER_RETROGRADE_TRAFFIC                                    |
| 3:122986429  | KPNA1        | REACTOME_COPII_MEDIATED_VESICLE_TRANSPORT                                                 |
| 4:76695927   | FAM47E-STBD1 | REACTOME_COPII_MEDIATED_VESICLE_TRANSPORT                                                 |
| 10:121669571 | INPP5F       | REACTOME_COPII_MEDIATED_VESICLE_TRANSPORT                                                 |
| 10:121683206 | INPP5F       | REACTOME_COPII_MEDIATED_VESICLE_TRANSPORT                                                 |
| 10:121686714 | INPP5F       | REACTOME_COPII_MEDIATED_VESICLE_TRANSPORT                                                 |
| 10:121689030 | INPP5F       | REACTOME_COPII_MEDIATED_VESICLE_TRANSPORT                                                 |
| 17:44800946  | WNT3         | REACTOME_COPII_MEDIATED_VESICLE_TRANSPORT                                                 |
| 17:44833217  | WNT3         | REACTOME_COPII_MEDIATED_VESICLE_TRANSPORT                                                 |
| 17:45020426  | WNT3         | REACTOME_COPII_MEDIATED_VESICLE_TRANSPORT                                                 |
| 17:45059032  | WNT3         | REACTOME_COPII_MEDIATED_VESICLE_TRANSPORT                                                 |
| 17:45089680  | WNT3         | REACTOME_COPII_MEDIATED_VESICLE_TRANSPORT                                                 |
| 2:135921205  | TMEM163      | REACTOME_COPI_INDEPENDENT_GOLGI_TO_ER_RETROGRADE_TRAFFIC                                  |
| 10:104258303 | GBF1         | REACTOME_COPI_INDEPENDENT_GOLGI_TO_ER_RETROGRADE_TRAFFIC                                  |
| 3:121411876  | KPNA1        | REACTOME_COPI_MEDIATED_ANTEROGRADE_TRANSPORT                                              |
| 3:121412702  | KPNA1        | REACTOME_COPI_MEDIATED_ANTEROGRADE_TRANSPORT                                              |
| 4:76695927   | FAM47E-STBD1 | REACTOME_COPI_MEDIATED_ANTEROGRADE_TRANSPORT                                              |
| 4:113947327  | CAMK2D       | REACTOME_COPI_MEDIATED_ANTEROGRADE_TRANSPORT                                              |
| 4:114015252  | CAMK2D       | REACTOME_COPI_MEDIATED_ANTEROGRADE_TRANSPORT                                              |
| 4:114032570  | CAMK2D       | REACTOME_COPI_MEDIATED_ANTEROGRADE_TRANSPORT                                              |
| 4:114067233  | CAMK2D       | REACTOME_COPI_MEDIATED_ANTEROGRADE_TRANSPORT                                              |
| 4:114077386  | CAMK2D       | REACTOME_COPI_MEDIATED_ANTEROGRADE_TRANSPORT                                              |
| 4:114113772  | CAMK2D       | REACTOME_COPI_MEDIATED_ANTEROGRADE_TRANSPORT                                              |
| 4:114122398  | CAMK2D       | REACTOME_COPI_MEDIATED_ANTEROGRADE_TRANSPORT                                              |
| 4:114172749  | CAMK2D       | REACTOME_COPI_MEDIATED_ANTEROGRADE_TRANSPORT                                              |
| 4:114217997  | CAMK2D       | REACTOME_COPI_MEDIATED_ANTEROGRADE_TRANSPORT                                              |
| 10:104005410 | GBF1         | REACTOME_COPI_MEDIATED_ANTEROGRADE_TRANSPORT                                              |
| 10:104034550 | GBF1         | REACTOME_COPI_MEDIATED_ANTEROGRADE_TRANSPORT                                              |
| 10:104258303 | GBF1         | REACTOME_COPI_MEDIATED_ANTEROGRADE_TRANSPORT                                              |
| 17:44800946  | WNT3         | REACTOME_COPI_MEDIATED_ANTEROGRADE_TRANSPORT                                              |
| 17:44833217  | WNT3         | REACTOME_COPI_MEDIATED_ANTEROGRADE_TRANSPORT                                              |
| 17:45020426  | WNT3         | REACTOME_COPI_MEDIATED_ANTEROGRADE_TRANSPORT                                              |
| 17:45059032  | WNT3         | REACTOME_COPI_MEDIATED_ANTEROGRADE_TRANSPORT                                              |
| 17:45089680  | WNT3         | REACTOME_COPI_MEDIATED_ANTEROGRADE_TRANSPORT                                              |
| 5:133558885  | C5orf24      | REACTOME_COSTIMULATION_BY_THE_CD28_FAMILY                                                 |
| 6:32602372   | HLA-DRB5     | REACTOME_COSTIMULATION_BY_THE_CD28_FAMILY                                                 |
| 6:112137847  | FYN          | REACTOME_COSTIMULATION_BY_THE_CD28_FAMILY                                                 |
| 6:112151452  | FYN          | REACTOME_COSTIMULATION_BY_THE_CD28_FAMILY                                                 |
| 6:112175069  | FYN          | REACTOME_COSTIMULATION_BY_THE_CD28_FAMILY                                                 |
| 17:43390763  | CRHR1_2      | REACTOME_COSTIMULATION_BY_THE_CD28_FAMILY                                                 |
| 4:114424939  | CAMK2D       | REACTOME_CREB1_PHOSPHORYLATION_THROUGH_NMDA_RECEPTOR_MEDIATED_ACTIVATION_OF_RAS_SIGNALING |

|              |                |                                                                                           |
|--------------|----------------|-------------------------------------------------------------------------------------------|
| 4:114494052  | <i>CAMK2D</i>  | REACTOME_CREB1_PHOSPHORYLATION_THROUGH_NMDA_RECEPTOR_MEDIATED_ACTIVATION_OF_RAS_SIGNALING |
| 4:114529492  | <i>CAMK2D</i>  | REACTOME_CREB1_PHOSPHORYLATION_THROUGH_NMDA_RECEPTOR_MEDIATED_ACTIVATION_OF_RAS_SIGNALING |
| 4:114539964  | <i>CAMK2D</i>  | REACTOME_CREB1_PHOSPHORYLATION_THROUGH_NMDA_RECEPTOR_MEDIATED_ACTIVATION_OF_RAS_SIGNALING |
| 4:114597918  | <i>CAMK2D</i>  | REACTOME_CREB1_PHOSPHORYLATION_THROUGH_NMDA_RECEPTOR_MEDIATED_ACTIVATION_OF_RAS_SIGNALING |
| 11:83219006  | <i>DLG2</i>    | REACTOME_CREB1_PHOSPHORYLATION_THROUGH_NMDA_RECEPTOR_MEDIATED_ACTIVATION_OF_RAS_SIGNALING |
| 11:83232915  | <i>DLG2</i>    | REACTOME_CREB1_PHOSPHORYLATION_THROUGH_NMDA_RECEPTOR_MEDIATED_ACTIVATION_OF_RAS_SIGNALING |
| 11:83282740  | <i>DLG2</i>    | REACTOME_CREB1_PHOSPHORYLATION_THROUGH_NMDA_RECEPTOR_MEDIATED_ACTIVATION_OF_RAS_SIGNALING |
| 11:83387273  | <i>DLG2</i>    | REACTOME_CREB1_PHOSPHORYLATION_THROUGH_NMDA_RECEPTOR_MEDIATED_ACTIVATION_OF_RAS_SIGNALING |
| 11:83538733  | <i>DLG2</i>    | REACTOME_CREB1_PHOSPHORYLATION_THROUGH_NMDA_RECEPTOR_MEDIATED_ACTIVATION_OF_RAS_SIGNALING |
| 11:83544472  | <i>DLG2</i>    | REACTOME_CREB1_PHOSPHORYLATION_THROUGH_NMDA_RECEPTOR_MEDIATED_ACTIVATION_OF_RAS_SIGNALING |
| 11:83578152  | <i>DLG2</i>    | REACTOME_CREB1_PHOSPHORYLATION_THROUGH_NMDA_RECEPTOR_MEDIATED_ACTIVATION_OF_RAS_SIGNALING |
| 11:83647657  | <i>DLG2</i>    | REACTOME_CREB1_PHOSPHORYLATION_THROUGH_NMDA_RECEPTOR_MEDIATED_ACTIVATION_OF_RAS_SIGNALING |
| 11:83669903  | <i>DLG2</i>    | REACTOME_CREB1_PHOSPHORYLATION_THROUGH_NMDA_RECEPTOR_MEDIATED_ACTIVATION_OF_RAS_SIGNALING |
| 11:83736246  | <i>DLG2</i>    | REACTOME_CREB1_PHOSPHORYLATION_THROUGH_NMDA_RECEPTOR_MEDIATED_ACTIVATION_OF_RAS_SIGNALING |
| 11:83762918  | <i>DLG2</i>    | REACTOME_CREB1_PHOSPHORYLATION_THROUGH_NMDA_RECEPTOR_MEDIATED_ACTIVATION_OF_RAS_SIGNALING |
| 11:83823752  | <i>DLG2</i>    | REACTOME_CREB1_PHOSPHORYLATION_THROUGH_NMDA_RECEPTOR_MEDIATED_ACTIVATION_OF_RAS_SIGNALING |
| 11:83839992  | <i>DLG2</i>    | REACTOME_CREB1_PHOSPHORYLATION_THROUGH_NMDA_RECEPTOR_MEDIATED_ACTIVATION_OF_RAS_SIGNALING |
| 11:84104763  | <i>DLG2</i>    | REACTOME_CREB1_PHOSPHORYLATION_THROUGH_NMDA_RECEPTOR_MEDIATED_ACTIVATION_OF_RAS_SIGNALING |
| 11:84169039  | <i>DLG2</i>    | REACTOME_CREB1_PHOSPHORYLATION_THROUGH_NMDA_RECEPTOR_MEDIATED_ACTIVATION_OF_RAS_SIGNALING |
| 11:84221628  | <i>DLG2</i>    | REACTOME_CREB1_PHOSPHORYLATION_THROUGH_NMDA_RECEPTOR_MEDIATED_ACTIVATION_OF_RAS_SIGNALING |
| 11:84312008  | <i>DLG2</i>    | REACTOME_CREB1_PHOSPHORYLATION_THROUGH_NMDA_RECEPTOR_MEDIATED_ACTIVATION_OF_RAS_SIGNALING |
| 11:84324361  | <i>DLG2</i>    | REACTOME_CREB1_PHOSPHORYLATION_THROUGH_NMDA_RECEPTOR_MEDIATED_ACTIVATION_OF_RAS_SIGNALING |
| 11:84360346  | <i>DLG2</i>    | REACTOME_CREB1_PHOSPHORYLATION_THROUGH_NMDA_RECEPTOR_MEDIATED_ACTIVATION_OF_RAS_SIGNALING |
| 11:84403409  | <i>DLG2</i>    | REACTOME_CREB1_PHOSPHORYLATION_THROUGH_NMDA_RECEPTOR_MEDIATED_ACTIVATION_OF_RAS_SIGNALING |
| 17:7101771   | <i>V1NB1</i>   | REACTOME_CREB1_PHOSPHORYLATION_THROUGH_NMDA_RECEPTOR_MEDIATED_ACTIVATION_OF_RAS_SIGNALING |
| 3:48835245   | <i>IP6K2</i>   | REACTOME_CREB1_PHOSPHORYLATION_THROUGH_THE_ACTIVATION_OF_ADENYLATE_CYCLASE                |
| 8:131799767  | <i>FAM49B</i>  | REACTOME_CREB1_PHOSPHORYLATION_THROUGH_THE_ACTIVATION_OF_ADENYLATE_CYCLASE                |
| 8:131845512  | <i>FAM49B</i>  | REACTOME_CREB1_PHOSPHORYLATION_THROUGH_THE_ACTIVATION_OF_ADENYLATE_CYCLASE                |
| 8:131865425  | <i>FAM49B</i>  | REACTOME_CREB1_PHOSPHORYLATION_THROUGH_THE_ACTIVATION_OF_ADENYLATE_CYCLASE                |
| 8:131901170  | <i>FAM49B</i>  | REACTOME_CREB1_PHOSPHORYLATION_THROUGH_THE_ACTIVATION_OF_ADENYLATE_CYCLASE                |
| 1:155181232  | <i>GBAP1</i>   | REACTOME_CRISTAE_FORMATION                                                                |
| 6:112137847  | <i>FYN</i>     | REACTOME_CRMP5_IN_SEMA3A_SIGNALING                                                        |
| 6:112151452  | <i>FYN</i>     | REACTOME_CRMP5_IN_SEMA3A_SIGNALING                                                        |
| 6:112175069  | <i>FYN</i>     | REACTOME_CRMP5_IN_SEMA3A_SIGNALING                                                        |
| 8:23190941   | <i>BIN3</i>    | REACTOME_CROSSLINKING_OF_COLLAGEN_FIBRILS                                                 |
| 8:23212542   | <i>BIN3</i>    | REACTOME_CROSSLINKING_OF_COLLAGEN_FIBRILS                                                 |
| 8:23216225   | <i>BIN3</i>    | REACTOME_CROSSLINKING_OF_COLLAGEN_FIBRILS                                                 |
| 8:23223713   | <i>BIN3</i>    | REACTOME_CROSSLINKING_OF_COLLAGEN_FIBRILS                                                 |
| 5:133558885  | <i>C5orf24</i> | REACTOME_CTLA4_INHIBITORY_SIGNALING                                                       |
| 6:112137847  | <i>FYN</i>     | REACTOME_CTLA4_INHIBITORY_SIGNALING                                                       |
| 6:112151452  | <i>FYN</i>     | REACTOME_CTLA4_INHIBITORY_SIGNALING                                                       |
| 6:112175069  | <i>FYN</i>     | REACTOME_CTLA4_INHIBITORY_SIGNALING                                                       |
| 6:112137847  | <i>FYN</i>     | REACTOME_C_TYPE_LECTIN_RECEPTORS_CLRS                                                     |
| 6:112151452  | <i>FYN</i>     | REACTOME_C_TYPE_LECTIN_RECEPTORS_CLRS                                                     |
| 6:112175069  | <i>FYN</i>     | REACTOME_C_TYPE_LECTIN_RECEPTORS_CLRS                                                     |
| 10:103185542 | <i>GBF1</i>    | REACTOME_C_TYPE_LECTIN_RECEPTORS_CLRS                                                     |
| 10:103305087 | <i>GBF1</i>    | REACTOME_C_TYPE_LECTIN_RECEPTORS_CLRS                                                     |
| 10:103308244 | <i>GBF1</i>    | REACTOME_C_TYPE_LECTIN_RECEPTORS_CLRS                                                     |
| 17:43390763  | <i>CRHR1_2</i> | REACTOME_C_TYPE_LECTIN_RECEPTORS_CLRS                                                     |
| 3:48199695   | <i>IP6K2</i>   | REACTOME_CYCLIN_A_B1_B2_ASSOCIATED_EVENTS_DURING_G2_M_TRANSITION                          |
| 3:48214438   | <i>IP6K2</i>   | REACTOME_CYCLIN_A_B1_B2_ASSOCIATED_EVENTS_DURING_G2_M_TRANSITION                          |
| 5:133558885  | <i>C5orf24</i> | REACTOME_CYCLIN_A_B1_B2_ASSOCIATED_EVENTS_DURING_G2_M_TRANSITION                          |
| 1:226497419  | <i>ITPKB</i>   | REACTOME_CYCLIN_A:CDK2_ASSOCIATED_EVENTS_AT_S_PHASE_ENTRY                                 |

|              |                 |                                                           |
|--------------|-----------------|-----------------------------------------------------------|
| 3:48199695   | <i>IP6K2</i>    | REACTOME_CYCLIN_A:CDK2_ASSOCIATED_EVENTS_AT_S_PHASE_ENTRY |
| 3:48214438   | <i>IP6K2</i>    | REACTOME_CYCLIN_A:CDK2_ASSOCIATED_EVENTS_AT_S_PHASE_ENTRY |
| 14:74640180  | <i>RPS6KL1</i>  | REACTOME_CYCLIN_A:CDK2_ASSOCIATED_EVENTS_AT_S_PHASE_ENTRY |
| 2:102612026  | <i>MAP4K4</i>   | REACTOME_CYTOKINE_SIGNALING_IN_IMMUNE_SYSTEM              |
| 2:102621855  | <i>MAP4K4</i>   | REACTOME_CYTOKINE_SIGNALING_IN_IMMUNE_SYSTEM              |
| 2:102631503  | <i>MAP4K4</i>   | REACTOME_CYTOKINE_SIGNALING_IN_IMMUNE_SYSTEM              |
| 2:102633387  | <i>MAP4K4</i>   | REACTOME_CYTOKINE_SIGNALING_IN_IMMUNE_SYSTEM              |
| 2:102720323  | <i>MAP4K4</i>   | REACTOME_CYTOKINE_SIGNALING_IN_IMMUNE_SYSTEM              |
| 2:102783052  | <i>MAP4K4</i>   | REACTOME_CYTOKINE_SIGNALING_IN_IMMUNE_SYSTEM              |
| 2:102826146  | <i>MAP4K4</i>   | REACTOME_CYTOKINE_SIGNALING_IN_IMMUNE_SYSTEM              |
| 2:103047986  | <i>MAP4K4</i>   | REACTOME_CYTOKINE_SIGNALING_IN_IMMUNE_SYSTEM              |
| 2:103063855  | <i>MAP4K4</i>   | REACTOME_CYTOKINE_SIGNALING_IN_IMMUNE_SYSTEM              |
| 2:103066346  | <i>MAP4K4</i>   | REACTOME_CYTOKINE_SIGNALING_IN_IMMUNE_SYSTEM              |
| 3:48748989   | <i>IP6K2</i>    | REACTOME_CYTOKINE_SIGNALING_IN_IMMUNE_SYSTEM              |
| 3:48766111   | <i>IP6K2</i>    | REACTOME_CYTOKINE_SIGNALING_IN_IMMUNE_SYSTEM              |
| 3:122200170  | <i>KPNA1</i>    | REACTOME_CYTOKINE_SIGNALING_IN_IMMUNE_SYSTEM              |
| 4:114424939  | <i>CAMK2D</i>   | REACTOME_CYTOKINE_SIGNALING_IN_IMMUNE_SYSTEM              |
| 4:114494052  | <i>CAMK2D</i>   | REACTOME_CYTOKINE_SIGNALING_IN_IMMUNE_SYSTEM              |
| 4:114529492  | <i>CAMK2D</i>   | REACTOME_CYTOKINE_SIGNALING_IN_IMMUNE_SYSTEM              |
| 4:114539964  | <i>CAMK2D</i>   | REACTOME_CYTOKINE_SIGNALING_IN_IMMUNE_SYSTEM              |
| 4:114597918  | <i>CAMK2D</i>   | REACTOME_CYTOKINE_SIGNALING_IN_IMMUNE_SYSTEM              |
| 5:133558885  | <i>C5orf24</i>  | REACTOME_CYTOKINE_SIGNALING_IN_IMMUNE_SYSTEM              |
| 6:29798642   | <i>TRIM40</i>   | REACTOME_CYTOKINE_SIGNALING_IN_IMMUNE_SYSTEM              |
| 6:30075864   | <i>TRIM40</i>   | REACTOME_CYTOKINE_SIGNALING_IN_IMMUNE_SYSTEM              |
| 6:32151443   | <i>HLA-DRB5</i> | REACTOME_CYTOKINE_SIGNALING_IN_IMMUNE_SYSTEM              |
| 6:32602372   | <i>HLA-DRB5</i> | REACTOME_CYTOKINE_SIGNALING_IN_IMMUNE_SYSTEM              |
| 6:112137847  | <i>FYN</i>      | REACTOME_CYTOKINE_SIGNALING_IN_IMMUNE_SYSTEM              |
| 6:112151452  | <i>FYN</i>      | REACTOME_CYTOKINE_SIGNALING_IN_IMMUNE_SYSTEM              |
| 6:112175069  | <i>FYN</i>      | REACTOME_CYTOKINE_SIGNALING_IN_IMMUNE_SYSTEM              |
| 8:21565088   | <i>BIN3</i>     | REACTOME_CYTOKINE_SIGNALING_IN_IMMUNE_SYSTEM              |
| 8:21582921   | <i>BIN3</i>     | REACTOME_CYTOKINE_SIGNALING_IN_IMMUNE_SYSTEM              |
| 8:21665306   | <i>BIN3</i>     | REACTOME_CYTOKINE_SIGNALING_IN_IMMUNE_SYSTEM              |
| 8:21668901   | <i>BIN3</i>     | REACTOME_CYTOKINE_SIGNALING_IN_IMMUNE_SYSTEM              |
| 10:103185542 | <i>GBF1</i>     | REACTOME_CYTOKINE_SIGNALING_IN_IMMUNE_SYSTEM              |
| 10:103305087 | <i>GBF1</i>     | REACTOME_CYTOKINE_SIGNALING_IN_IMMUNE_SYSTEM              |
| 10:103308244 | <i>GBF1</i>     | REACTOME_CYTOKINE_SIGNALING_IN_IMMUNE_SYSTEM              |
| 11:83219006  | <i>DLG2</i>     | REACTOME_CYTOKINE_SIGNALING_IN_IMMUNE_SYSTEM              |
| 11:83232915  | <i>DLG2</i>     | REACTOME_CYTOKINE_SIGNALING_IN_IMMUNE_SYSTEM              |
| 11:83282740  | <i>DLG2</i>     | REACTOME_CYTOKINE_SIGNALING_IN_IMMUNE_SYSTEM              |
| 11:83387273  | <i>DLG2</i>     | REACTOME_CYTOKINE_SIGNALING_IN_IMMUNE_SYSTEM              |
| 11:83538733  | <i>DLG2</i>     | REACTOME_CYTOKINE_SIGNALING_IN_IMMUNE_SYSTEM              |
| 11:83544472  | <i>DLG2</i>     | REACTOME_CYTOKINE_SIGNALING_IN_IMMUNE_SYSTEM              |
| 11:83578152  | <i>DLG2</i>     | REACTOME_CYTOKINE_SIGNALING_IN_IMMUNE_SYSTEM              |
| 11:83647657  | <i>DLG2</i>     | REACTOME_CYTOKINE_SIGNALING_IN_IMMUNE_SYSTEM              |
| 11:83669903  | <i>DLG2</i>     | REACTOME_CYTOKINE_SIGNALING_IN_IMMUNE_SYSTEM              |
| 11:83736246  | <i>DLG2</i>     | REACTOME_CYTOKINE_SIGNALING_IN_IMMUNE_SYSTEM              |
| 11:83762918  | <i>DLG2</i>     | REACTOME_CYTOKINE_SIGNALING_IN_IMMUNE_SYSTEM              |
| 11:83823752  | <i>DLG2</i>     | REACTOME_CYTOKINE_SIGNALING_IN_IMMUNE_SYSTEM              |
| 11:83839992  | <i>DLG2</i>     | REACTOME_CYTOKINE_SIGNALING_IN_IMMUNE_SYSTEM              |
| 11:84104763  | <i>DLG2</i>     | REACTOME_CYTOKINE_SIGNALING_IN_IMMUNE_SYSTEM              |
| 11:84169039  | <i>DLG2</i>     | REACTOME_CYTOKINE_SIGNALING_IN_IMMUNE_SYSTEM              |
| 11:84221628  | <i>DLG2</i>     | REACTOME_CYTOKINE_SIGNALING_IN_IMMUNE_SYSTEM              |
| 11:84312008  | <i>DLG2</i>     | REACTOME_CYTOKINE_SIGNALING_IN_IMMUNE_SYSTEM              |

|             |                     |                                                       |
|-------------|---------------------|-------------------------------------------------------|
| 11:84324361 | <i>DLG2</i>         | REACTOME_CYTOKINE_SIGNALING_IN_IMMUNE_SYSTEM          |
| 11:84360346 | <i>DLG2</i>         | REACTOME_CYTOKINE_SIGNALING_IN_IMMUNE_SYSTEM          |
| 11:84403409 | <i>DLG2</i>         | REACTOME_CYTOKINE_SIGNALING_IN_IMMUNE_SYSTEM          |
| 15:61016235 | <i>VPS13C</i>       | REACTOME_CYTOKINE_SIGNALING_IN_IMMUNE_SYSTEM          |
| 15:61065568 | <i>VPS13C</i>       | REACTOME_CYTOKINE_SIGNALING_IN_IMMUNE_SYSTEM          |
| 15:61094298 | <i>VPS13C</i>       | REACTOME_CYTOKINE_SIGNALING_IN_IMMUNE_SYSTEM          |
| 15:61140736 | <i>VPS13C</i>       | REACTOME_CYTOKINE_SIGNALING_IN_IMMUNE_SYSTEM          |
| 15:61142062 | <i>VPS13C</i>       | REACTOME_CYTOKINE_SIGNALING_IN_IMMUNE_SYSTEM          |
| 15:61162571 | <i>VPS13C</i>       | REACTOME_CYTOKINE_SIGNALING_IN_IMMUNE_SYSTEM          |
| 15:61191617 | <i>VPS13C</i>       | REACTOME_CYTOKINE_SIGNALING_IN_IMMUNE_SYSTEM          |
| 15:61195427 | <i>VPS13C</i>       | REACTOME_CYTOKINE_SIGNALING_IN_IMMUNE_SYSTEM          |
| 15:61221682 | <i>VPS13C</i>       | REACTOME_CYTOKINE_SIGNALING_IN_IMMUNE_SYSTEM          |
| 15:61298486 | <i>VPS13C</i>       | REACTOME_CYTOKINE_SIGNALING_IN_IMMUNE_SYSTEM          |
| 15:61375480 | <i>VPS13C</i>       | REACTOME_CYTOKINE_SIGNALING_IN_IMMUNE_SYSTEM          |
| 15:61434581 | <i>VPS13C</i>       | REACTOME_CYTOKINE_SIGNALING_IN_IMMUNE_SYSTEM          |
| 15:61467078 | <i>VPS13C</i>       | REACTOME_CYTOKINE_SIGNALING_IN_IMMUNE_SYSTEM          |
| 15:61470808 | <i>VPS13C</i>       | REACTOME_CYTOKINE_SIGNALING_IN_IMMUNE_SYSTEM          |
| 15:61500263 | <i>VPS13C</i>       | REACTOME_CYTOKINE_SIGNALING_IN_IMMUNE_SYSTEM          |
| 16:31370452 | <i>SETD1A</i>       | REACTOME_CYTOKINE_SIGNALING_IN_IMMUNE_SYSTEM          |
| 16:50730088 | <i>CASC16</i>       | REACTOME_CYTOKINE_SIGNALING_IN_IMMUNE_SYSTEM          |
| 16:50730446 | <i>CASC16</i>       | REACTOME_CYTOKINE_SIGNALING_IN_IMMUNE_SYSTEM          |
| 16:50745926 | <i>CASC16</i>       | REACTOME_CYTOKINE_SIGNALING_IN_IMMUNE_SYSTEM          |
| 17:6667554  | <i>V1NB1</i>        | REACTOME_CYTOKINE_SIGNALING_IN_IMMUNE_SYSTEM          |
| 17:7101771  | <i>V1NB1</i>        | REACTOME_CYTOKINE_SIGNALING_IN_IMMUNE_SYSTEM          |
| 17:7479140  | <i>V1NB1</i>        | REACTOME_CYTOKINE_SIGNALING_IN_IMMUNE_SYSTEM          |
| 17:7480325  | <i>V1NB1</i>        | REACTOME_CYTOKINE_SIGNALING_IN_IMMUNE_SYSTEM          |
| 17:7578671  | <i>V1NB1</i>        | REACTOME_CYTOKINE_SIGNALING_IN_IMMUNE_SYSTEM          |
| 17:40392358 | <i>RETREG3</i>      | REACTOME_CYTOKINE_SIGNALING_IN_IMMUNE_SYSTEM          |
| 17:41845031 | <i>FAM171A2</i>     | REACTOME_CYTOKINE_SIGNALING_IN_IMMUNE_SYSTEM          |
| 17:42454243 | <i>FAM171A2</i>     | REACTOME_CYTOKINE_SIGNALING_IN_IMMUNE_SYSTEM          |
| 17:43390763 | <i>CRHR1_2</i>      | REACTOME_CYTOKINE_SIGNALING_IN_IMMUNE_SYSTEM          |
| 17:59791813 | <i>BRIP1</i>        | REACTOME_CYTOSOLIC_IRON_SULFUR_CLUSTER_ASSEMBLY       |
| 17:59922925 | <i>BRIP1</i>        | REACTOME_CYTOSOLIC_IRON_SULFUR_CLUSTER_ASSEMBLY       |
| 8:22108784  | <i>BIN3</i>         | REACTOME_CYTOSOLIC_SENSORS_OF_PATHOGEN_ASSOCIATED_DNA |
| 7:65705034  | <i>GS1-124K5.11</i> | REACTOME_CYTOSOLIC_SULFONATION_OF_SMALL_MOLECULES     |
| 7:65824287  | <i>GS1-124K5.11</i> | REACTOME_CYTOSOLIC_SULFONATION_OF_SMALL_MOLECULES     |
| 6:31758240  | <i>HLA-DRB5</i>     | REACTOME_CYTOSOLIC_TRNA_AMINOACYLATION                |
| 6:31762311  | <i>HLA-DRB5</i>     | REACTOME_CYTOSOLIC_TRNA_AMINOACYLATION                |
| 3:48835245  | <i>IP6K2</i>        | REACTOME_DAG_AND_IP3_SIGNALING                        |
| 3:123089448 | <i>KPNA1</i>        | REACTOME_DAG_AND_IP3_SIGNALING                        |
| 4:114424939 | <i>CAMK2D</i>       | REACTOME_DAG_AND_IP3_SIGNALING                        |
| 4:114494052 | <i>CAMK2D</i>       | REACTOME_DAG_AND_IP3_SIGNALING                        |
| 4:114529492 | <i>CAMK2D</i>       | REACTOME_DAG_AND_IP3_SIGNALING                        |
| 4:114539964 | <i>CAMK2D</i>       | REACTOME_DAG_AND_IP3_SIGNALING                        |
| 4:114597918 | <i>CAMK2D</i>       | REACTOME_DAG_AND_IP3_SIGNALING                        |
| 8:131799767 | <i>FAM49B</i>       | REACTOME_DAG_AND_IP3_SIGNALING                        |
| 8:131845512 | <i>FAM49B</i>       | REACTOME_DAG_AND_IP3_SIGNALING                        |
| 8:131865425 | <i>FAM49B</i>       | REACTOME_DAG_AND_IP3_SIGNALING                        |
| 8:131901170 | <i>FAM49B</i>       | REACTOME_DAG_AND_IP3_SIGNALING                        |
| 16:50300511 | <i>CASC16</i>       | REACTOME_DAG_AND_IP3_SIGNALING                        |
| 16:50317039 | <i>CASC16</i>       | REACTOME_DAG_AND_IP3_SIGNALING                        |
| 6:112137847 | <i>FYN</i>          | REACTOME_DAP12_INTERACTIONS                           |
| 6:112151452 | <i>FYN</i>          | REACTOME_DAP12_INTERACTIONS                           |

|              |                 |                                                                   |
|--------------|-----------------|-------------------------------------------------------------------|
| 6:112175069  | <i>FYN</i>      | REACTOME_DAP12_INTERACTIONS                                       |
| 6:112137847  | <i>FYN</i>      | REACTOME_DAP12_SIGNALING                                          |
| 6:112151452  | <i>FYN</i>      | REACTOME_DAP12_SIGNALING                                          |
| 6:112175069  | <i>FYN</i>      | REACTOME_DAP12_SIGNALING                                          |
| 3:48835245   | <i>IP6K2</i>    | REACTOME_DARPP_32_EVENTS                                          |
| 5:59236972   | <i>ELOVL7</i>   | REACTOME_DARPP_32_EVENTS                                          |
| 5:59490965   | <i>ELOVL7</i>   | REACTOME_DARPP_32_EVENTS                                          |
| 5:59554719   | <i>ELOVL7</i>   | REACTOME_DARPP_32_EVENTS                                          |
| 5:59705316   | <i>ELOVL7</i>   | REACTOME_DARPP_32_EVENTS                                          |
| 5:59736085   | <i>ELOVL7</i>   | REACTOME_DARPP_32_EVENTS                                          |
| 5:59812853   | <i>ELOVL7</i>   | REACTOME_DARPP_32_EVENTS                                          |
| 5:133558885  | <i>C5orf24</i>  | REACTOME_DARPP_32_EVENTS                                          |
| 6:112137847  | <i>FYN</i>      | REACTOME_DCC_MEDIATED_ATTRACTIVE_SIGNALING                        |
| 6:112151452  | <i>FYN</i>      | REACTOME_DCC_MEDIATED_ATTRACTIVE_SIGNALING                        |
| 6:112175069  | <i>FYN</i>      | REACTOME_DCC_MEDIATED_ATTRACTIVE_SIGNALING                        |
| 6:32151443   | <i>HLA-DRB5</i> | REACTOME_DDX58_IFIH1_MEDIATED_INDUCION_OF_INTERFERON_ALPHA_BETA   |
| 16:50790891  | <i>CASC16</i>   | REACTOME_DDX58_IFIH1_MEDIATED_INDUCION_OF_INTERFERON_ALPHA_BETA   |
| 10:103185542 | <i>GBF1</i>     | REACTOME_DEACTIVATION_OF_THE_BETA_CATENIN_TRANSACTIVATING_COMPLEX |
| 10:103305087 | <i>GBF1</i>     | REACTOME_DEACTIVATION_OF_THE_BETA_CATENIN_TRANSACTIVATING_COMPLEX |
| 10:103308244 | <i>GBF1</i>     | REACTOME_DEACTIVATION_OF_THE_BETA_CATENIN_TRANSACTIVATING_COMPLEX |
| 19:3008151   | <i>SPPL2B</i>   | REACTOME_DEACTIVATION_OF_THE_BETA_CATENIN_TRANSACTIVATING_COMPLEX |
| 19:3024077   | <i>SPPL2B</i>   | REACTOME_DEACTIVATION_OF_THE_BETA_CATENIN_TRANSACTIVATING_COMPLEX |
| 17:7479140   | <i>V1NB1</i>    | REACTOME_DEADENYLATION_DEPENDENT_MRNA_DECAY                       |
| 17:7480325   | <i>V1NB1</i>    | REACTOME_DEADENYLATION_DEPENDENT_MRNA_DECAY                       |
| 17:7479140   | <i>V1NB1</i>    | REACTOME_DEADENYLATION_OF_MRNA                                    |
| 17:7480325   | <i>V1NB1</i>    | REACTOME_DEADENYLATION_OF_MRNA                                    |
| 1:155975202  | <i>GBAP1</i>    | REACTOME_DEATH_RECEPTOR_SIGNALLING                                |
| 1:227067656  | <i>ITPKB</i>    | REACTOME_DEATH_RECEPTOR_SIGNALLING                                |
| 3:49406095   | <i>IP6K2</i>    | REACTOME_DEATH_RECEPTOR_SIGNALLING                                |
| 3:49424231   | <i>IP6K2</i>    | REACTOME_DEATH_RECEPTOR_SIGNALLING                                |
| 3:49450137   | <i>IP6K2</i>    | REACTOME_DEATH_RECEPTOR_SIGNALLING                                |
| 8:23050400   | <i>BIN3</i>     | REACTOME_DEATH_RECEPTOR_SIGNALLING                                |
| 16:50790891  | <i>CASC16</i>   | REACTOME_DEATH_RECEPTOR_SIGNALLING                                |
| 19:2335872   | <i>SPPL2B</i>   | REACTOME_DEATH_RECEPTOR_SIGNALLING                                |
| 19:2346990   | <i>SPPL2B</i>   | REACTOME_DEATH_RECEPTOR_SIGNALLING                                |
| 19:2352757   | <i>SPPL2B</i>   | REACTOME_DEATH_RECEPTOR_SIGNALLING                                |
| 10:103185542 | <i>GBF1</i>     | REACTOME_DECTIN_1_MEDIATED_NONCANONICAL_NF_KB_SIGNALING           |
| 10:103305087 | <i>GBF1</i>     | REACTOME_DECTIN_1_MEDIATED_NONCANONICAL_NF_KB_SIGNALING           |
| 10:103308244 | <i>GBF1</i>     | REACTOME_DECTIN_1_MEDIATED_NONCANONICAL_NF_KB_SIGNALING           |
| 17:43390763  | <i>CRHR1_2</i>  | REACTOME_DECTIN_1_MEDIATED_NONCANONICAL_NF_KB_SIGNALING           |
| 6:112137847  | <i>FYN</i>      | REACTOME_DECTIN_2_FAMILY                                          |
| 6:112151452  | <i>FYN</i>      | REACTOME_DECTIN_2_FAMILY                                          |
| 6:112175069  | <i>FYN</i>      | REACTOME_DECTIN_2_FAMILY                                          |
| 6:32151443   | <i>HLA-DRB5</i> | REACTOME_DEFECTIVE_CFTR_CAUSES_CYSTIC_FIBROSIS                    |
| 6:32179319   | <i>HLA-DRB5</i> | REACTOME_DEFECTIVE_LFNG_CAUSES_SCD03                              |
| 6:32186193   | <i>HLA-DRB5</i> | REACTOME_DEFECTIVE_LFNG_CAUSES_SCD03                              |
| 3:182760073  | <i>MCCC1</i>    | REACTOME_DEFECTS_IN_BIOTIN_BTN_METABOLISM                         |
| 21:38136802  | <i>DYRK1A</i>   | REACTOME_DEFECTS_IN_BIOTIN_BTN_METABOLISM                         |
| 21:38168749  | <i>DYRK1A</i>   | REACTOME_DEFECTS_IN_BIOTIN_BTN_METABOLISM                         |
| 21:38210057  | <i>DYRK1A</i>   | REACTOME_DEFECTS_IN_BIOTIN_BTN_METABOLISM                         |
| 21:38238679  | <i>DYRK1A</i>   | REACTOME_DEFECTS_IN_BIOTIN_BTN_METABOLISM                         |
| 21:38328886  | <i>DYRK1A</i>   | REACTOME_DEFECTS_IN_BIOTIN_BTN_METABOLISM                         |
| 21:38332144  | <i>DYRK1A</i>   | REACTOME_DEFECTS_IN_BIOTIN_BTN_METABOLISM                         |

|              |                 |                                                                 |
|--------------|-----------------|-----------------------------------------------------------------|
| 21:38356061  | <i>DYRK1A</i>   | REACTOME_DEFECTS_IN_BIOTIN_BTN_METABOLISM                       |
| 14:74764925  | <i>RPS6KL1</i>  | REACTOME_DEFECTS_IN_COBALAMIN_B12_METABOLISM                    |
| 3:182760073  | <i>MCCC1</i>    | REACTOME_DEFECTS_IN_VITAMIN_AND_COFACTOR_METABOLISM             |
| 14:74764925  | <i>RPS6KL1</i>  | REACTOME_DEFECTS_IN_VITAMIN_AND_COFACTOR_METABOLISM             |
| 21:38136802  | <i>DYRK1A</i>   | REACTOME_DEFECTS_IN_VITAMIN_AND_COFACTOR_METABOLISM             |
| 21:38168749  | <i>DYRK1A</i>   | REACTOME_DEFECTS_IN_VITAMIN_AND_COFACTOR_METABOLISM             |
| 21:38210057  | <i>DYRK1A</i>   | REACTOME_DEFECTS_IN_VITAMIN_AND_COFACTOR_METABOLISM             |
| 21:38238679  | <i>DYRK1A</i>   | REACTOME_DEFECTS_IN_VITAMIN_AND_COFACTOR_METABOLISM             |
| 21:38328886  | <i>DYRK1A</i>   | REACTOME_DEFECTS_IN_VITAMIN_AND_COFACTOR_METABOLISM             |
| 21:38332144  | <i>DYRK1A</i>   | REACTOME_DEFECTS_IN_VITAMIN_AND_COFACTOR_METABOLISM             |
| 21:38356061  | <i>DYRK1A</i>   | REACTOME_DEFECTS_IN_VITAMIN_AND_COFACTOR_METABOLISM             |
| 9:33791164   | <i>UBAP2</i>    | REACTOME_DEFENSINS                                              |
| 5:133558885  | <i>C5orf24</i>  | REACTOME_DEGRADATION_OF_BETA_CATENIN_BY_THE_DESTRUCTION_COMPLEX |
| 10:103185542 | <i>GBF1</i>     | REACTOME_DEGRADATION_OF_BETA_CATENIN_BY_THE_DESTRUCTION_COMPLEX |
| 10:103305087 | <i>GBF1</i>     | REACTOME_DEGRADATION_OF_BETA_CATENIN_BY_THE_DESTRUCTION_COMPLEX |
| 10:103308244 | <i>GBF1</i>     | REACTOME_DEGRADATION_OF_BETA_CATENIN_BY_THE_DESTRUCTION_COMPLEX |
| 19:3008151   | <i>SPPL2B</i>   | REACTOME_DEGRADATION_OF_BETA_CATENIN_BY_THE_DESTRUCTION_COMPLEX |
| 19:3024077   | <i>SPPL2B</i>   | REACTOME_DEGRADATION_OF_BETA_CATENIN_BY_THE_DESTRUCTION_COMPLEX |
| 17:7129974   | <i>V1NB1</i>    | REACTOME_DEGRADATION_OF_DVL                                     |
| 10:103185542 | <i>GBF1</i>     | REACTOME_DEGRADATION_OF_GLI1_BY_THE_PROTEASOME                  |
| 10:103305087 | <i>GBF1</i>     | REACTOME_DEGRADATION_OF_GLI1_BY_THE_PROTEASOME                  |
| 10:103308244 | <i>GBF1</i>     | REACTOME_DEGRADATION_OF_GLI1_BY_THE_PROTEASOME                  |
| 10:104278055 | <i>GBF1</i>     | REACTOME_DEGRADATION_OF_GLI1_BY_THE_PROTEASOME                  |
| 10:104305501 | <i>GBF1</i>     | REACTOME_DEGRADATION_OF_GLI1_BY_THE_PROTEASOME                  |
| 1:155027082  | <i>GBAP1</i>    | REACTOME_DEGRADATION_OF_THE_EXTRACELLULAR_MATRIX                |
| 1:155033317  | <i>GBAP1</i>    | REACTOME_DEGRADATION_OF_THE_EXTRACELLULAR_MATRIX                |
| 6:33153528   | <i>HLA-DRB5</i> | REACTOME_DEGRADATION_OF_THE_EXTRACELLULAR_MATRIX                |
| 8:11712443   | <i>CTSB</i>     | REACTOME_DEGRADATION_OF_THE_EXTRACELLULAR_MATRIX                |
| 17:76869878  | <i>DNAH17</i>   | REACTOME_DEGRADATION_OF_THE_EXTRACELLULAR_MATRIX                |
| 1:156059276  | <i>GBAP1</i>    | REACTOME_DEPOLYMERISATION_OF_THE_NUCLEAR_LAMINA                 |
| 9:34342881   | <i>UBAP2</i>    | REACTOME_DETOXIFICATION_OF_REACTIVE_OXYGEN_SPECIES              |
| 3:48199695   | <i>IP6K2</i>    | REACTOME_DEUBIQUITINATION                                       |
| 3:48214438   | <i>IP6K2</i>    | REACTOME_DEUBIQUITINATION                                       |
| 3:49406095   | <i>IP6K2</i>    | REACTOME_DEUBIQUITINATION                                       |
| 3:49424231   | <i>IP6K2</i>    | REACTOME_DEUBIQUITINATION                                       |
| 3:49450137   | <i>IP6K2</i>    | REACTOME_DEUBIQUITINATION                                       |
| 3:49740895   | <i>IP6K2</i>    | REACTOME_DEUBIQUITINATION                                       |
| 16:19562008  | <i>SYT17</i>    | REACTOME_DEUBIQUITINATION                                       |
| 16:50730088  | <i>CASC16</i>   | REACTOME_DEUBIQUITINATION                                       |
| 16:50730446  | <i>CASC16</i>   | REACTOME_DEUBIQUITINATION                                       |
| 16:50745926  | <i>CASC16</i>   | REACTOME_DEUBIQUITINATION                                       |
| 16:50790891  | <i>CASC16</i>   | REACTOME_DEUBIQUITINATION                                       |
| 17:7578671   | <i>V1NB1</i>    | REACTOME_DEUBIQUITINATION                                       |
| 1:171837985  | <i>VAMP4</i>    | REACTOME_DEVELOPMENTAL_BIOLOGY                                  |
| 1:171945488  | <i>VAMP4</i>    | REACTOME_DEVELOPMENTAL_BIOLOGY                                  |
| 1:172137119  | <i>VAMP4</i>    | REACTOME_DEVELOPMENTAL_BIOLOGY                                  |
| 1:172386261  | <i>VAMP4</i>    | REACTOME_DEVELOPMENTAL_BIOLOGY                                  |
| 1:204876966  | <i>RAB29</i>    | REACTOME_DEVELOPMENTAL_BIOLOGY                                  |
| 1:204940972  | <i>RAB29</i>    | REACTOME_DEVELOPMENTAL_BIOLOGY                                  |
| 1:226074321  | <i>ITPKB</i>    | REACTOME_DEVELOPMENTAL_BIOLOGY                                  |
| 1:227067656  | <i>ITPKB</i>    | REACTOME_DEVELOPMENTAL_BIOLOGY                                  |
| 3:48835245   | <i>IP6K2</i>    | REACTOME_DEVELOPMENTAL_BIOLOGY                                  |
| 3:49406095   | <i>IP6K2</i>    | REACTOME_DEVELOPMENTAL_BIOLOGY                                  |

|             |                 |                                                                                         |
|-------------|-----------------|-----------------------------------------------------------------------------------------|
| 3:49424231  | <i>IP6K2</i>    | REACTOME_DEVELOPMENTAL_BIOLOGY                                                          |
| 3:49450137  | <i>IP6K2</i>    | REACTOME_DEVELOPMENTAL_BIOLOGY                                                          |
| 3:49561208  | <i>IP6K2</i>    | REACTOME_DEVELOPMENTAL_BIOLOGY                                                          |
| 4:17622910  | <i>LCORL</i>    | REACTOME_DEVELOPMENTAL_BIOLOGY                                                          |
| 4:113947327 | <i>CAMK2D</i>   | REACTOME_DEVELOPMENTAL_BIOLOGY                                                          |
| 4:114015252 | <i>CAMK2D</i>   | REACTOME_DEVELOPMENTAL_BIOLOGY                                                          |
| 4:114032570 | <i>CAMK2D</i>   | REACTOME_DEVELOPMENTAL_BIOLOGY                                                          |
| 4:114067233 | <i>CAMK2D</i>   | REACTOME_DEVELOPMENTAL_BIOLOGY                                                          |
| 4:114077386 | <i>CAMK2D</i>   | REACTOME_DEVELOPMENTAL_BIOLOGY                                                          |
| 4:114113772 | <i>CAMK2D</i>   | REACTOME_DEVELOPMENTAL_BIOLOGY                                                          |
| 4:114122398 | <i>CAMK2D</i>   | REACTOME_DEVELOPMENTAL_BIOLOGY                                                          |
| 4:114172749 | <i>CAMK2D</i>   | REACTOME_DEVELOPMENTAL_BIOLOGY                                                          |
| 4:114217997 | <i>CAMK2D</i>   | REACTOME_DEVELOPMENTAL_BIOLOGY                                                          |
| 6:112137847 | <i>FYN</i>      | REACTOME_DEVELOPMENTAL_BIOLOGY                                                          |
| 6:112151452 | <i>FYN</i>      | REACTOME_DEVELOPMENTAL_BIOLOGY                                                          |
| 6:112175069 | <i>FYN</i>      | REACTOME_DEVELOPMENTAL_BIOLOGY                                                          |
| 8:21565088  | <i>BIN3</i>     | REACTOME_DEVELOPMENTAL_BIOLOGY                                                          |
| 8:21582921  | <i>BIN3</i>     | REACTOME_DEVELOPMENTAL_BIOLOGY                                                          |
| 8:21665306  | <i>BIN3</i>     | REACTOME_DEVELOPMENTAL_BIOLOGY                                                          |
| 8:21668901  | <i>BIN3</i>     | REACTOME_DEVELOPMENTAL_BIOLOGY                                                          |
| 8:22007293  | <i>BIN3</i>     | REACTOME_DEVELOPMENTAL_BIOLOGY                                                          |
| 9:17579690  | <i>SH3GL2_2</i> | REACTOME_DEVELOPMENTAL_BIOLOGY                                                          |
| 9:17587160  | <i>SH3GL2_2</i> | REACTOME_DEVELOPMENTAL_BIOLOGY                                                          |
| 9:17609302  | <i>SH3GL2_2</i> | REACTOME_DEVELOPMENTAL_BIOLOGY                                                          |
| 9:17626762  | <i>SH3GL2_2</i> | REACTOME_DEVELOPMENTAL_BIOLOGY                                                          |
| 9:17627444  | <i>SH3GL2_2</i> | REACTOME_DEVELOPMENTAL_BIOLOGY                                                          |
| 9:17642664  | <i>SH3GL2_2</i> | REACTOME_DEVELOPMENTAL_BIOLOGY                                                          |
| 9:17710876  | <i>SH3GL2_2</i> | REACTOME_DEVELOPMENTAL_BIOLOGY                                                          |
| 9:17732590  | <i>SH3GL2_2</i> | REACTOME_DEVELOPMENTAL_BIOLOGY                                                          |
| 9:17737514  | <i>SH3GL2_2</i> | REACTOME_DEVELOPMENTAL_BIOLOGY                                                          |
| 9:17758945  | <i>SH3GL2_2</i> | REACTOME_DEVELOPMENTAL_BIOLOGY                                                          |
| 12:41144387 | <i>LRRK2_2</i>  | REACTOME_DEVELOPMENTAL_BIOLOGY                                                          |
| 12:41147295 | <i>LRRK2_2</i>  | REACTOME_DEVELOPMENTAL_BIOLOGY                                                          |
| 12:41195135 | <i>LRRK2_2</i>  | REACTOME_DEVELOPMENTAL_BIOLOGY                                                          |
| 12:41251554 | <i>LRRK2_2</i>  | REACTOME_DEVELOPMENTAL_BIOLOGY                                                          |
| 12:41255129 | <i>LRRK2_2</i>  | REACTOME_DEVELOPMENTAL_BIOLOGY                                                          |
| 12:41297969 | <i>LRRK2_2</i>  | REACTOME_DEVELOPMENTAL_BIOLOGY                                                          |
| 12:41407403 | <i>LRRK2_2</i>  | REACTOME_DEVELOPMENTAL_BIOLOGY                                                          |
| 16:31004169 | <i>SETD1A</i>   | REACTOME_DEVELOPMENTAL_BIOLOGY                                                          |
| 17:7101771  | <i>V1NB1</i>    | REACTOME_DEVELOPMENTAL_BIOLOGY                                                          |
| 17:39883520 | <i>RETREG3</i>  | REACTOME_DEVELOPMENTAL_BIOLOGY                                                          |
| 17:42454243 | <i>FAM171A2</i> | REACTOME_DEVELOPMENTAL_BIOLOGY                                                          |
| 17:42855931 | <i>CRHR1_2</i>  | REACTOME_DEVELOPMENTAL_BIOLOGY                                                          |
| 17:60124582 | <i>BRIP1</i>    | REACTOME_DEVELOPMENTAL_BIOLOGY                                                          |
| 19:1611856  | <i>SPPL2B</i>   | REACTOME_DEVELOPMENTAL_BIOLOGY                                                          |
| 5:133558885 | <i>C5orf24</i>  | REACTOME_DISASSEMBLY_OF_THE_DESTRUCTION_COMPLEX_AND_RECRUITMENT_OF_AXIN_TO_THE_MEMBRANE |
| 17:7129974  | <i>V1NB1</i>    | REACTOME_DISASSEMBLY_OF_THE_DESTRUCTION_COMPLEX_AND_RECRUITMENT_OF_AXIN_TO_THE_MEMBRANE |
| 17:7491546  | <i>V1NB1</i>    | REACTOME_DISEASES_ASSOCIATED_WITH_N_GLYCOSYLATION_OF_PROTEINS                           |
| 3:49561208  | <i>IP6K2</i>    | REACTOME_DISEASES_ASSOCIATED_WITH_O_GLYCOSYLATION_OF_PROTEINS                           |
| 3:122645304 | <i>KPNA1</i>    | REACTOME_DISEASES_ASSOCIATED_WITH_O_GLYCOSYLATION_OF_PROTEINS                           |
| 3:122720608 | <i>KPNA1</i>    | REACTOME_DISEASES_ASSOCIATED_WITH_O_GLYCOSYLATION_OF_PROTEINS                           |
| 6:32179319  | <i>HLA-DRB5</i> | REACTOME_DISEASES_ASSOCIATED_WITH_O_GLYCOSYLATION_OF_PROTEINS                           |
| 6:32186193  | <i>HLA-DRB5</i> | REACTOME_DISEASES_ASSOCIATED_WITH_O_GLYCOSYLATION_OF_PROTEINS                           |

|              |                     |                                                               |
|--------------|---------------------|---------------------------------------------------------------|
| 9:18502815   | <i>SH3GL2_2</i>     | REACTOME_DISEASES_ASSOCIATED_WITH_O_GLYCOSYLATION_OF_PROTEINS |
| 9:18522254   | <i>SH3GL2_2</i>     | REACTOME_DISEASES_ASSOCIATED_WITH_O_GLYCOSYLATION_OF_PROTEINS |
| 9:18583014   | <i>SH3GL2_2</i>     | REACTOME_DISEASES_ASSOCIATED_WITH_O_GLYCOSYLATION_OF_PROTEINS |
| 9:18623302   | <i>SH3GL2_2</i>     | REACTOME_DISEASES_ASSOCIATED_WITH_O_GLYCOSYLATION_OF_PROTEINS |
| 9:18633417   | <i>SH3GL2_2</i>     | REACTOME_DISEASES_ASSOCIATED_WITH_O_GLYCOSYLATION_OF_PROTEINS |
| 9:18663540   | <i>SH3GL2_2</i>     | REACTOME_DISEASES_ASSOCIATED_WITH_O_GLYCOSYLATION_OF_PROTEINS |
| 9:18721847   | <i>SH3GL2_2</i>     | REACTOME_DISEASES_ASSOCIATED_WITH_O_GLYCOSYLATION_OF_PROTEINS |
| 9:18725820   | <i>SH3GL2_2</i>     | REACTOME_DISEASES_ASSOCIATED_WITH_O_GLYCOSYLATION_OF_PROTEINS |
| 1:156059276  | <i>GBAP1</i>        | REACTOME_DISEASE                                              |
| 1:227067656  | <i>ITPKB</i>        | REACTOME_DISEASE                                              |
| 2:135708115  | <i>TMEM163</i>      | REACTOME_DISEASE                                              |
| 3:48199695   | <i>IP6K2</i>        | REACTOME_DISEASE                                              |
| 3:48214438   | <i>IP6K2</i>        | REACTOME_DISEASE                                              |
| 3:49561208   | <i>IP6K2</i>        | REACTOME_DISEASE                                              |
| 3:122200170  | <i>KPNA1</i>        | REACTOME_DISEASE                                              |
| 3:122645304  | <i>KPNA1</i>        | REACTOME_DISEASE                                              |
| 3:122720608  | <i>KPNA1</i>        | REACTOME_DISEASE                                              |
| 3:182760073  | <i>MCCC1</i>        | REACTOME_DISEASE                                              |
| 4:114424939  | <i>CAMK2D</i>       | REACTOME_DISEASE                                              |
| 4:114494052  | <i>CAMK2D</i>       | REACTOME_DISEASE                                              |
| 4:114529492  | <i>CAMK2D</i>       | REACTOME_DISEASE                                              |
| 4:114539964  | <i>CAMK2D</i>       | REACTOME_DISEASE                                              |
| 4:114597918  | <i>CAMK2D</i>       | REACTOME_DISEASE                                              |
| 5:133558885  | <i>C5orf24</i>      | REACTOME_DISEASE                                              |
| 6:31925679   | <i>HLA-DRB5</i>     | REACTOME_DISEASE                                              |
| 6:32151443   | <i>HLA-DRB5</i>     | REACTOME_DISEASE                                              |
| 6:32179319   | <i>HLA-DRB5</i>     | REACTOME_DISEASE                                              |
| 6:32186193   | <i>HLA-DRB5</i>     | REACTOME_DISEASE                                              |
| 6:112137847  | <i>FYN</i>          | REACTOME_DISEASE                                              |
| 6:112151452  | <i>FYN</i>          | REACTOME_DISEASE                                              |
| 6:112175069  | <i>FYN</i>          | REACTOME_DISEASE                                              |
| 7:65425894   | <i>GS1-124K5.11</i> | REACTOME_DISEASE                                              |
| 8:17125768   | <i>FGF20</i>        | REACTOME_DISEASE                                              |
| 9:17579690   | <i>SH3GL2_2</i>     | REACTOME_DISEASE                                              |
| 9:17587160   | <i>SH3GL2_2</i>     | REACTOME_DISEASE                                              |
| 9:17609302   | <i>SH3GL2_2</i>     | REACTOME_DISEASE                                              |
| 9:17626762   | <i>SH3GL2_2</i>     | REACTOME_DISEASE                                              |
| 9:17627444   | <i>SH3GL2_2</i>     | REACTOME_DISEASE                                              |
| 9:17642664   | <i>SH3GL2_2</i>     | REACTOME_DISEASE                                              |
| 9:17710876   | <i>SH3GL2_2</i>     | REACTOME_DISEASE                                              |
| 9:17732590   | <i>SH3GL2_2</i>     | REACTOME_DISEASE                                              |
| 9:17737514   | <i>SH3GL2_2</i>     | REACTOME_DISEASE                                              |
| 9:17758945   | <i>SH3GL2_2</i>     | REACTOME_DISEASE                                              |
| 9:18502815   | <i>SH3GL2_2</i>     | REACTOME_DISEASE                                              |
| 9:18522254   | <i>SH3GL2_2</i>     | REACTOME_DISEASE                                              |
| 9:18583014   | <i>SH3GL2_2</i>     | REACTOME_DISEASE                                              |
| 9:18623302   | <i>SH3GL2_2</i>     | REACTOME_DISEASE                                              |
| 9:18633417   | <i>SH3GL2_2</i>     | REACTOME_DISEASE                                              |
| 9:18663540   | <i>SH3GL2_2</i>     | REACTOME_DISEASE                                              |
| 9:18721847   | <i>SH3GL2_2</i>     | REACTOME_DISEASE                                              |
| 9:18725820   | <i>SH3GL2_2</i>     | REACTOME_DISEASE                                              |
| 10:15199347  | <i>ITGA8</i>        | REACTOME_DISEASE                                              |
| 10:103185542 | <i>GBF1</i>         | REACTOME_DISEASE                                              |

|              |                     |                                              |
|--------------|---------------------|----------------------------------------------|
| 10:103305087 | <i>GBF1</i>         | REACTOME_DISEASE                             |
| 10:103308244 | <i>GBF1</i>         | REACTOME_DISEASE                             |
| 10:104591639 | <i>GBF1</i>         | REACTOME_DISEASE                             |
| 14:74764925  | <i>RPS6KL1</i>      | REACTOME_DISEASE                             |
| 16:31004169  | <i>SETD1A</i>       | REACTOME_DISEASE                             |
| 17:7491546   | <i>V1NB1</i>        | REACTOME_DISEASE                             |
| 17:40392358  | <i>RETREG3</i>      | REACTOME_DISEASE                             |
| 17:41056283  | <i>RETREG3</i>      | REACTOME_DISEASE                             |
| 17:42332803  | <i>FAM171A2</i>     | REACTOME_DISEASE                             |
| 17:42338993  | <i>FAM171A2</i>     | REACTOME_DISEASE                             |
| 17:42454243  | <i>FAM171A2</i>     | REACTOME_DISEASE                             |
| 17:43181287  | <i>CRHR1_2</i>      | REACTOME_DISEASE                             |
| 17:43184627  | <i>CRHR1_2</i>      | REACTOME_DISEASE                             |
| 21:38136802  | <i>DYRK1A</i>       | REACTOME_DISEASE                             |
| 21:38168749  | <i>DYRK1A</i>       | REACTOME_DISEASE                             |
| 21:38210057  | <i>DYRK1A</i>       | REACTOME_DISEASE                             |
| 21:38238679  | <i>DYRK1A</i>       | REACTOME_DISEASE                             |
| 21:38328886  | <i>DYRK1A</i>       | REACTOME_DISEASE                             |
| 21:38332144  | <i>DYRK1A</i>       | REACTOME_DISEASE                             |
| 21:38356061  | <i>DYRK1A</i>       | REACTOME_DISEASE                             |
| 7:65425894   | <i>GS1-124K5.11</i> | REACTOME_DISEASES_OF_CARBOHYDRATE_METABOLISM |
| 17:41056283  | <i>RETREG3</i>      | REACTOME_DISEASES_OF_CARBOHYDRATE_METABOLISM |
| 3:49561208   | <i>IP6K2</i>        | REACTOME_DISEASES_OF_GLYCOSYLATION           |
| 3:122645304  | <i>KPNA1</i>        | REACTOME_DISEASES_OF_GLYCOSYLATION           |
| 3:122720608  | <i>KPNA1</i>        | REACTOME_DISEASES_OF_GLYCOSYLATION           |
| 6:32179319   | <i>HLA-DRB5</i>     | REACTOME_DISEASES_OF_GLYCOSYLATION           |
| 6:32186193   | <i>HLA-DRB5</i>     | REACTOME_DISEASES_OF_GLYCOSYLATION           |
| 9:18502815   | <i>SH3GL2_2</i>     | REACTOME_DISEASES_OF_GLYCOSYLATION           |
| 9:18522254   | <i>SH3GL2_2</i>     | REACTOME_DISEASES_OF_GLYCOSYLATION           |
| 9:18583014   | <i>SH3GL2_2</i>     | REACTOME_DISEASES_OF_GLYCOSYLATION           |
| 9:18623302   | <i>SH3GL2_2</i>     | REACTOME_DISEASES_OF_GLYCOSYLATION           |
| 9:18633417   | <i>SH3GL2_2</i>     | REACTOME_DISEASES_OF_GLYCOSYLATION           |
| 9:18663540   | <i>SH3GL2_2</i>     | REACTOME_DISEASES_OF_GLYCOSYLATION           |
| 9:18721847   | <i>SH3GL2_2</i>     | REACTOME_DISEASES_OF_GLYCOSYLATION           |
| 9:18725820   | <i>SH3GL2_2</i>     | REACTOME_DISEASES_OF_GLYCOSYLATION           |
| 17:7491546   | <i>V1NB1</i>        | REACTOME_DISEASES_OF_GLYCOSYLATION           |
| 3:182760073  | <i>MCCC1</i>        | REACTOME_DISEASES_OF_METABOLISM              |
| 7:65425894   | <i>GS1-124K5.11</i> | REACTOME_DISEASES_OF_METABOLISM              |
| 10:104591639 | <i>GBF1</i>         | REACTOME_DISEASES_OF_METABOLISM              |
| 14:74764925  | <i>RPS6KL1</i>      | REACTOME_DISEASES_OF_METABOLISM              |
| 17:41056283  | <i>RETREG3</i>      | REACTOME_DISEASES_OF_METABOLISM              |
| 21:38136802  | <i>DYRK1A</i>       | REACTOME_DISEASES_OF_METABOLISM              |
| 21:38168749  | <i>DYRK1A</i>       | REACTOME_DISEASES_OF_METABOLISM              |
| 21:38210057  | <i>DYRK1A</i>       | REACTOME_DISEASES_OF_METABOLISM              |
| 21:38238679  | <i>DYRK1A</i>       | REACTOME_DISEASES_OF_METABOLISM              |
| 21:38328886  | <i>DYRK1A</i>       | REACTOME_DISEASES_OF_METABOLISM              |
| 21:38332144  | <i>DYRK1A</i>       | REACTOME_DISEASES_OF_METABOLISM              |
| 21:38356061  | <i>DYRK1A</i>       | REACTOME_DISEASES_OF_METABOLISM              |
| 1:156059276  | <i>GBAP1</i>        | REACTOME_DISEASES_OF_SIGNAL_TRANSDUCTION     |
| 1:227067656  | <i>ITPKB</i>        | REACTOME_DISEASES_OF_SIGNAL_TRANSDUCTION     |
| 4:114424939  | <i>CAMK2D</i>       | REACTOME_DISEASES_OF_SIGNAL_TRANSDUCTION     |
| 4:114494052  | <i>CAMK2D</i>       | REACTOME_DISEASES_OF_SIGNAL_TRANSDUCTION     |
| 4:114529492  | <i>CAMK2D</i>       | REACTOME_DISEASES_OF_SIGNAL_TRANSDUCTION     |

|              |                     |                                                        |
|--------------|---------------------|--------------------------------------------------------|
| 4:114539964  | <i>CAMK2D</i>       | REACTOME_DISEASES_OF_SIGNAL_TRANSDUCTION               |
| 4:114597918  | <i>CAMK2D</i>       | REACTOME_DISEASES_OF_SIGNAL_TRANSDUCTION               |
| 5:133558885  | <i>C5orf24</i>      | REACTOME_DISEASES_OF_SIGNAL_TRANSDUCTION               |
| 6:112137847  | <i>FYN</i>          | REACTOME_DISEASES_OF_SIGNAL_TRANSDUCTION               |
| 6:112151452  | <i>FYN</i>          | REACTOME_DISEASES_OF_SIGNAL_TRANSDUCTION               |
| 6:112175069  | <i>FYN</i>          | REACTOME_DISEASES_OF_SIGNAL_TRANSDUCTION               |
| 17:40392358  | <i>RETREG3</i>      | REACTOME_DISEASES_OF_SIGNAL_TRANSDUCTION               |
| 17:42454243  | <i>FAM171A2</i>     | REACTOME_DISEASES_OF_SIGNAL_TRANSDUCTION               |
| 6:32151443   | <i>HLA-DRB5</i>     | REACTOME_DISORDERS_OF_TRANSMEMBRANE_TRANSPORTERS       |
| 14:74764925  | <i>RPS6KL1</i>      | REACTOME_DISORDERS_OF_TRANSMEMBRANE_TRANSPORTERS       |
| 17:42332803  | <i>FAM171A2</i>     | REACTOME_DISORDERS_OF_TRANSMEMBRANE_TRANSPORTERS       |
| 17:42338993  | <i>FAM171A2</i>     | REACTOME_DISORDERS_OF_TRANSMEMBRANE_TRANSPORTERS       |
| 4:76407998   | <i>FAM47E-STBD1</i> | REACTOME_DNA_DAMAGE_BYPASS                             |
| 5:133710339  | <i>C5orf24</i>      | REACTOME_DNA_DAMAGE_BYPASS                             |
| 6:111628626  | <i>FYN</i>          | REACTOME_DNA_DAMAGE_BYPASS                             |
| 12:133206648 | <i>FBRSL1</i>       | REACTOME_DNA_DAMAGE_BYPASS                             |
| 12:133223685 | <i>FBRSL1</i>       | REACTOME_DNA_DAMAGE_BYPASS                             |
| 1:226568665  | <i>ITPKB</i>        | REACTOME_DNA_DAMAGE_RECOGNITION_IN_GG_NER              |
| 16:53747395  | <i>CHD9</i>         | REACTOME_DNA_DAMAGE_REVERSAL                           |
| 16:53842518  | <i>CHD9</i>         | REACTOME_DNA_DAMAGE_REVERSAL                           |
| 16:53867798  | <i>CHD9</i>         | REACTOME_DNA_DAMAGE_REVERSAL                           |
| 16:53887081  | <i>CHD9</i>         | REACTOME_DNA_DAMAGE_REVERSAL                           |
| 16:53933972  | <i>CHD9</i>         | REACTOME_DNA_DAMAGE_REVERSAL                           |
| 17:7578671   | <i>V1NB1</i>        | REACTOME_DNA_DAMAGE_TELOMERE_STRESS_INDUCED_SENESCENCE |
| 1:226568665  | <i>ITPKB</i>        | REACTOME_DNA_DOUBLE_STRAND_BREAK_REPAIR                |
| 2:17941653   | <i>KCNS3</i>        | REACTOME_DNA_DOUBLE_STRAND_BREAK_REPAIR                |
| 2:17963171   | <i>KCNS3</i>        | REACTOME_DNA_DOUBLE_STRAND_BREAK_REPAIR                |
| 6:133608051  | <i>RPS12</i>        | REACTOME_DNA_DOUBLE_STRAND_BREAK_REPAIR                |
| 6:133646494  | <i>RPS12</i>        | REACTOME_DNA_DOUBLE_STRAND_BREAK_REPAIR                |
| 6:133702425  | <i>RPS12</i>        | REACTOME_DNA_DOUBLE_STRAND_BREAK_REPAIR                |
| 6:133788110  | <i>RPS12</i>        | REACTOME_DNA_DOUBLE_STRAND_BREAK_REPAIR                |
| 12:133206648 | <i>FBRSL1</i>       | REACTOME_DNA_DOUBLE_STRAND_BREAK_REPAIR                |
| 12:133223685 | <i>FBRSL1</i>       | REACTOME_DNA_DOUBLE_STRAND_BREAK_REPAIR                |
| 17:7578671   | <i>V1NB1</i>        | REACTOME_DNA_DOUBLE_STRAND_BREAK_REPAIR                |
| 17:59791813  | <i>BRIP1</i>        | REACTOME_DNA_DOUBLE_STRAND_BREAK_REPAIR                |
| 17:59922925  | <i>BRIP1</i>        | REACTOME_DNA_DOUBLE_STRAND_BREAK_REPAIR                |
| 6:133608051  | <i>RPS12</i>        | REACTOME_DNA_DOUBLE_STRAND_BREAK_RESPONSE              |
| 6:133646494  | <i>RPS12</i>        | REACTOME_DNA_DOUBLE_STRAND_BREAK_RESPONSE              |
| 6:133702425  | <i>RPS12</i>        | REACTOME_DNA_DOUBLE_STRAND_BREAK_RESPONSE              |
| 6:133788110  | <i>RPS12</i>        | REACTOME_DNA_DOUBLE_STRAND_BREAK_RESPONSE              |
| 17:7578671   | <i>V1NB1</i>        | REACTOME_DNA_DOUBLE_STRAND_BREAK_RESPONSE              |
| 1:226568665  | <i>ITPKB</i>        | REACTOME_DNA_REPAIR                                    |
| 2:17941653   | <i>KCNS3</i>        | REACTOME_DNA_REPAIR                                    |
| 2:17963171   | <i>KCNS3</i>        | REACTOME_DNA_REPAIR                                    |
| 4:76407998   | <i>FAM47E-STBD1</i> | REACTOME_DNA_REPAIR                                    |
| 5:133710339  | <i>C5orf24</i>      | REACTOME_DNA_REPAIR                                    |
| 6:111628626  | <i>FYN</i>          | REACTOME_DNA_REPAIR                                    |
| 6:133608051  | <i>RPS12</i>        | REACTOME_DNA_REPAIR                                    |
| 6:133646494  | <i>RPS12</i>        | REACTOME_DNA_REPAIR                                    |
| 6:133702425  | <i>RPS12</i>        | REACTOME_DNA_REPAIR                                    |
| 6:133788110  | <i>RPS12</i>        | REACTOME_DNA_REPAIR                                    |
| 12:133206648 | <i>FBRSL1</i>       | REACTOME_DNA_REPAIR                                    |
| 12:133223685 | <i>FBRSL1</i>       | REACTOME_DNA_REPAIR                                    |

|              |                 |                                                                   |
|--------------|-----------------|-------------------------------------------------------------------|
| 16:53747395  | <i>CHD9</i>     | REACTOME_DNA_REPAIR                                               |
| 16:53842518  | <i>CHD9</i>     | REACTOME_DNA_REPAIR                                               |
| 16:53867798  | <i>CHD9</i>     | REACTOME_DNA_REPAIR                                               |
| 16:53887081  | <i>CHD9</i>     | REACTOME_DNA_REPAIR                                               |
| 16:53933972  | <i>CHD9</i>     | REACTOME_DNA_REPAIR                                               |
| 17:7578671   | <i>V1NB1</i>    | REACTOME_DNA_REPAIR                                               |
| 17:59791813  | <i>BRIP1</i>    | REACTOME_DNA_REPAIR                                               |
| 17:59922925  | <i>BRIP1</i>    | REACTOME_DNA_REPAIR                                               |
| 12:133206648 | <i>FBRSL1</i>   | REACTOME_DNA_REPLICATION_INITIATION                               |
| 12:133223685 | <i>FBRSL1</i>   | REACTOME_DNA_REPLICATION_INITIATION                               |
| 12:133206648 | <i>FBRSL1</i>   | REACTOME_DNA_REPLICATION_PRE_INITIATION                           |
| 12:133223685 | <i>FBRSL1</i>   | REACTOME_DNA_REPLICATION_PRE_INITIATION                           |
| 20:5934513   | <i>CRLS1</i>    | REACTOME_DNA_REPLICATION_PRE_INITIATION                           |
| 20:5935522   | <i>CRLS1</i>    | REACTOME_DNA_REPLICATION_PRE_INITIATION                           |
| 20:5968737   | <i>CRLS1</i>    | REACTOME_DNA_REPLICATION_PRE_INITIATION                           |
| 20:5968964   | <i>CRLS1</i>    | REACTOME_DNA_REPLICATION_PRE_INITIATION                           |
| 12:133206648 | <i>FBRSL1</i>   | REACTOME_DNA_REPLICATION                                          |
| 12:133223685 | <i>FBRSL1</i>   | REACTOME_DNA_REPLICATION                                          |
| 17:45215865  | <i>WNT3</i>     | REACTOME_DNA_REPLICATION                                          |
| 17:45244822  | <i>WNT3</i>     | REACTOME_DNA_REPLICATION                                          |
| 20:5934513   | <i>CRLS1</i>    | REACTOME_DNA_REPLICATION                                          |
| 20:5935522   | <i>CRLS1</i>    | REACTOME_DNA_REPLICATION                                          |
| 20:5968737   | <i>CRLS1</i>    | REACTOME_DNA_REPLICATION                                          |
| 20:5968964   | <i>CRLS1</i>    | REACTOME_DNA_REPLICATION                                          |
| 20:5934513   | <i>CRLS1</i>    | REACTOME_DNA_STRAND_ELONGATION                                    |
| 20:5935522   | <i>CRLS1</i>    | REACTOME_DNA_STRAND_ELONGATION                                    |
| 20:5968737   | <i>CRLS1</i>    | REACTOME_DNA_STRAND_ELONGATION                                    |
| 20:5968964   | <i>CRLS1</i>    | REACTOME_DNA_STRAND_ELONGATION                                    |
| 6:72646790   | <i>RIMS1</i>    | REACTOME_DOPAMINE_NEUROTRANSMITTER_RELEASE_CYCLE                  |
| 6:72648340   | <i>RIMS1</i>    | REACTOME_DOPAMINE_NEUROTRANSMITTER_RELEASE_CYCLE                  |
| 6:72686444   | <i>RIMS1</i>    | REACTOME_DOPAMINE_NEUROTRANSMITTER_RELEASE_CYCLE                  |
| 6:72716358   | <i>RIMS1</i>    | REACTOME_DOPAMINE_NEUROTRANSMITTER_RELEASE_CYCLE                  |
| 6:72904599   | <i>RIMS1</i>    | REACTOME_DOPAMINE_NEUROTRANSMITTER_RELEASE_CYCLE                  |
| 6:72913435   | <i>RIMS1</i>    | REACTOME_DOPAMINE_NEUROTRANSMITTER_RELEASE_CYCLE                  |
| 6:72930929   | <i>RIMS1</i>    | REACTOME_DOPAMINE_NEUROTRANSMITTER_RELEASE_CYCLE                  |
| 6:72982289   | <i>RIMS1</i>    | REACTOME_DOPAMINE_NEUROTRANSMITTER_RELEASE_CYCLE                  |
| 6:72986711   | <i>RIMS1</i>    | REACTOME_DOPAMINE_NEUROTRANSMITTER_RELEASE_CYCLE                  |
| 6:73008061   | <i>RIMS1</i>    | REACTOME_DOPAMINE_NEUROTRANSMITTER_RELEASE_CYCLE                  |
| 6:73060492   | <i>RIMS1</i>    | REACTOME_DOPAMINE_NEUROTRANSMITTER_RELEASE_CYCLE                  |
| 1:226568665  | <i>ITPKB</i>    | REACTOME_DOWNREGULATION_OF_SMAD2_3:SMAD4_TRANSCRIPTIONAL_ACTIVITY |
| 10:103185542 | <i>GBF1</i>     | REACTOME_DOWNSTREAM_SIGNALING_EVENTS_OF_B_CELL_RECEPTOR_BCR       |
| 10:103305087 | <i>GBF1</i>     | REACTOME_DOWNSTREAM_SIGNALING_EVENTS_OF_B_CELL_RECEPTOR_BCR       |
| 10:103308244 | <i>GBF1</i>     | REACTOME_DOWNSTREAM_SIGNALING_EVENTS_OF_B_CELL_RECEPTOR_BCR       |
| 17:40392358  | <i>RETREG3</i>  | REACTOME_DOWNSTREAM_SIGNAL_TRANSDUCTION                           |
| 6:32602372   | <i>HLA-DRB5</i> | REACTOME_DOWNSTREAM_TCR_SIGNALING                                 |
| 10:103185542 | <i>GBF1</i>     | REACTOME_DOWNSTREAM_TCR_SIGNALING                                 |
| 10:103305087 | <i>GBF1</i>     | REACTOME_DOWNSTREAM_TCR_SIGNALING                                 |
| 10:103308244 | <i>GBF1</i>     | REACTOME_DOWNSTREAM_TCR_SIGNALING                                 |
| 1:226568665  | <i>ITPKB</i>    | REACTOME_DUAL_INCISION_IN_GG_NER                                  |
| 12:133206648 | <i>FBRSL1</i>   | REACTOME_DUAL_INCISION_IN_GG_NER                                  |
| 12:133223685 | <i>FBRSL1</i>   | REACTOME_DUAL_INCISION_IN_GG_NER                                  |
| 12:133206648 | <i>FBRSL1</i>   | REACTOME_DUAL_INCISION_IN_TC_NER                                  |
| 12:133223685 | <i>FBRSL1</i>   | REACTOME_DUAL_INCISION_IN_TC_NER                                  |

|             |                 |                                                                      |
|-------------|-----------------|----------------------------------------------------------------------|
| 20:5934513  | <i>CRLS1</i>    | REACTOME_E2F_ENABLED_INHIBITION_OF_PRE_REPLICATION_COMPLEX_FORMATION |
| 20:5935522  | <i>CRLS1</i>    | REACTOME_E2F_ENABLED_INHIBITION_OF_PRE_REPLICATION_COMPLEX_FORMATION |
| 20:5968737  | <i>CRLS1</i>    | REACTOME_E2F_ENABLED_INHIBITION_OF_PRE_REPLICATION_COMPLEX_FORMATION |
| 20:5968964  | <i>CRLS1</i>    | REACTOME_E2F_ENABLED_INHIBITION_OF_PRE_REPLICATION_COMPLEX_FORMATION |
| 5:133558885 | <i>C5orf24</i>  | REACTOME_E2F_MEDIATED_REGULATION_OF_DNA_REPLICATION                  |
| 20:5934513  | <i>CRLS1</i>    | REACTOME_E2F_MEDIATED_REGULATION_OF_DNA_REPLICATION                  |
| 20:5935522  | <i>CRLS1</i>    | REACTOME_E2F_MEDIATED_REGULATION_OF_DNA_REPLICATION                  |
| 20:5968737  | <i>CRLS1</i>    | REACTOME_E2F_MEDIATED_REGULATION_OF_DNA_REPLICATION                  |
| 20:5968964  | <i>CRLS1</i>    | REACTOME_E2F_MEDIATED_REGULATION_OF_DNA_REPLICATION                  |
| 5:133710339 | <i>C5orf24</i>  | REACTOME_E3_UBIQUITIN_LIGASES_UBIQUITINATE_TARGET_PROTEINS           |
| 3:122200170 | <i>KPNA1</i>    | REACTOME_EARLY_PHASE_OF_HIV_LIFE_CYCLE                               |
| 3:49162284  | <i>IP6K2</i>    | REACTOME_ECM_PROTEOGLYCANS                                           |
| 3:49162583  | <i>IP6K2</i>    | REACTOME_ECM_PROTEOGLYCANS                                           |
| 3:49561208  | <i>IP6K2</i>    | REACTOME_ECM_PROTEOGLYCANS                                           |
| 6:32031904  | <i>HLA-DRB5</i> | REACTOME_ECM_PROTEOGLYCANS                                           |
| 6:32062687  | <i>HLA-DRB5</i> | REACTOME_ECM_PROTEOGLYCANS                                           |
| 6:112494762 | <i>FYN</i>      | REACTOME_ECM_PROTEOGLYCANS                                           |
| 6:112531401 | <i>FYN</i>      | REACTOME_ECM_PROTEOGLYCANS                                           |
| 6:112561154 | <i>FYN</i>      | REACTOME_ECM_PROTEOGLYCANS                                           |
| 6:112561430 | <i>FYN</i>      | REACTOME_ECM_PROTEOGLYCANS                                           |
| 10:15562608 | <i>ITGA8</i>    | REACTOME_ECM_PROTEOGLYCANS                                           |
| 10:15569598 | <i>ITGA8</i>    | REACTOME_ECM_PROTEOGLYCANS                                           |
| 10:15652368 | <i>ITGA8</i>    | REACTOME_ECM_PROTEOGLYCANS                                           |
| 16:31370452 | <i>SETD1A</i>   | REACTOME_ECM_PROTEOGLYCANS                                           |
| 17:42454243 | <i>FAM171A2</i> | REACTOME_ECM_PROTEOGLYCANS                                           |
| 9:17579690  | <i>SH3GL2_2</i> | REACTOME_EGFR_DOWNREGULATION                                         |
| 9:17587160  | <i>SH3GL2_2</i> | REACTOME_EGFR_DOWNREGULATION                                         |
| 9:17609302  | <i>SH3GL2_2</i> | REACTOME_EGFR_DOWNREGULATION                                         |
| 9:17626762  | <i>SH3GL2_2</i> | REACTOME_EGFR_DOWNREGULATION                                         |
| 9:17627444  | <i>SH3GL2_2</i> | REACTOME_EGFR_DOWNREGULATION                                         |
| 9:17642664  | <i>SH3GL2_2</i> | REACTOME_EGFR_DOWNREGULATION                                         |
| 9:17710876  | <i>SH3GL2_2</i> | REACTOME_EGFR_DOWNREGULATION                                         |
| 9:17732590  | <i>SH3GL2_2</i> | REACTOME_EGFR_DOWNREGULATION                                         |
| 9:17737514  | <i>SH3GL2_2</i> | REACTOME_EGFR_DOWNREGULATION                                         |
| 9:17758945  | <i>SH3GL2_2</i> | REACTOME_EGFR_DOWNREGULATION                                         |
| 8:23190941  | <i>BIN3</i>     | REACTOME_ELASTIC_FIBRE_FORMATION                                     |
| 8:23212542  | <i>BIN3</i>     | REACTOME_ELASTIC_FIBRE_FORMATION                                     |
| 8:23216225  | <i>BIN3</i>     | REACTOME_ELASTIC_FIBRE_FORMATION                                     |
| 8:23223713  | <i>BIN3</i>     | REACTOME_ELASTIC_FIBRE_FORMATION                                     |
| 10:15562608 | <i>ITGA8</i>    | REACTOME_ELASTIC_FIBRE_FORMATION                                     |
| 10:15569598 | <i>ITGA8</i>    | REACTOME_ELASTIC_FIBRE_FORMATION                                     |
| 10:15652368 | <i>ITGA8</i>    | REACTOME_ELASTIC_FIBRE_FORMATION                                     |
| 14:75057014 | <i>RPS6KL1</i>  | REACTOME_ELASTIC_FIBRE_FORMATION                                     |
| 8:17125768  | <i>FGF20</i>    | REACTOME_ENDOSOMAL_SORTING_COMPLEX_REQUIRED_FOR_TRANSPORT_ESCRT      |
| 6:29798642  | <i>TRIM40</i>   | REACTOME_ENDOSOMAL_VACUOLAR_PATHWAY                                  |
| 13:49890086 | <i>CAB39L</i>   | REACTOME_ENERGY_DEPENDENT_REGULATION_OF_MTOR_BY_LKB1_AMPK            |
| 13:49897815 | <i>CAB39L</i>   | REACTOME_ENERGY_DEPENDENT_REGULATION_OF_MTOR_BY_LKB1_AMPK            |
| 13:49914395 | <i>CAB39L</i>   | REACTOME_ENERGY_DEPENDENT_REGULATION_OF_MTOR_BY_LKB1_AMPK            |
| 13:49927732 | <i>CAB39L</i>   | REACTOME_ENERGY_DEPENDENT_REGULATION_OF_MTOR_BY_LKB1_AMPK            |
| 13:49944031 | <i>CAB39L</i>   | REACTOME_ENERGY_DEPENDENT_REGULATION_OF_MTOR_BY_LKB1_AMPK            |
| 13:49960054 | <i>CAB39L</i>   | REACTOME_ENERGY_DEPENDENT_REGULATION_OF_MTOR_BY_LKB1_AMPK            |
| 13:49976904 | <i>CAB39L</i>   | REACTOME_ENERGY_DEPENDENT_REGULATION_OF_MTOR_BY_LKB1_AMPK            |
| 13:50013818 | <i>CAB39L</i>   | REACTOME_ENERGY_DEPENDENT_REGULATION_OF_MTOR_BY_LKB1_AMPK            |

|              |                     |                                                                      |
|--------------|---------------------|----------------------------------------------------------------------|
| 3:49406095   | <i>IP6K2</i>        | REACTOME_EPHA_MEDIATED_GROWTH_CONE_COLLAPSE                          |
| 3:49424231   | <i>IP6K2</i>        | REACTOME_EPHA_MEDIATED_GROWTH_CONE_COLLAPSE                          |
| 3:49450137   | <i>IP6K2</i>        | REACTOME_EPHA_MEDIATED_GROWTH_CONE_COLLAPSE                          |
| 6:112137847  | <i>FYN</i>          | REACTOME_EPHA_MEDIATED_GROWTH_CONE_COLLAPSE                          |
| 6:112151452  | <i>FYN</i>          | REACTOME_EPHA_MEDIATED_GROWTH_CONE_COLLAPSE                          |
| 6:112175069  | <i>FYN</i>          | REACTOME_EPHA_MEDIATED_GROWTH_CONE_COLLAPSE                          |
| 3:49406095   | <i>IP6K2</i>        | REACTOME_EPHB_MEDIATED_FORWARD_SIGNALING                             |
| 3:49424231   | <i>IP6K2</i>        | REACTOME_EPHB_MEDIATED_FORWARD_SIGNALING                             |
| 3:49450137   | <i>IP6K2</i>        | REACTOME_EPHB_MEDIATED_FORWARD_SIGNALING                             |
| 6:112137847  | <i>FYN</i>          | REACTOME_EPHB_MEDIATED_FORWARD_SIGNALING                             |
| 6:112151452  | <i>FYN</i>          | REACTOME_EPHB_MEDIATED_FORWARD_SIGNALING                             |
| 6:112175069  | <i>FYN</i>          | REACTOME_EPHB_MEDIATED_FORWARD_SIGNALING                             |
| 1:227067656  | <i>ITPKB</i>        | REACTOME_EPH_EPHRIN_MEDIATED_REPULSION_OF_CELLS                      |
| 6:112137847  | <i>FYN</i>          | REACTOME_EPH_EPHRIN_MEDIATED_REPULSION_OF_CELLS                      |
| 6:112151452  | <i>FYN</i>          | REACTOME_EPH_EPHRIN_MEDIATED_REPULSION_OF_CELLS                      |
| 6:112175069  | <i>FYN</i>          | REACTOME_EPH_EPHRIN_MEDIATED_REPULSION_OF_CELLS                      |
| 1:227067656  | <i>ITPKB</i>        | REACTOME_EPH_EPHRIN_SIGNALING                                        |
| 3:49406095   | <i>IP6K2</i>        | REACTOME_EPH_EPHRIN_SIGNALING                                        |
| 3:49424231   | <i>IP6K2</i>        | REACTOME_EPH_EPHRIN_SIGNALING                                        |
| 3:49450137   | <i>IP6K2</i>        | REACTOME_EPH_EPHRIN_SIGNALING                                        |
| 6:112137847  | <i>FYN</i>          | REACTOME_EPH_EPHRIN_SIGNALING                                        |
| 6:112151452  | <i>FYN</i>          | REACTOME_EPH_EPHRIN_SIGNALING                                        |
| 6:112175069  | <i>FYN</i>          | REACTOME_EPH_EPHRIN_SIGNALING                                        |
| 6:112137847  | <i>FYN</i>          | REACTOME_EPHRIN_SIGNALING                                            |
| 6:112151452  | <i>FYN</i>          | REACTOME_EPHRIN_SIGNALING                                            |
| 6:112175069  | <i>FYN</i>          | REACTOME_EPHRIN_SIGNALING                                            |
| 6:31862876   | <i>HLA-DRB5</i>     | REACTOME_EPIGENETIC_REGULATION_OF_GENE_EXPRESSION                    |
| 6:33381459   | <i>HLA-DRB5</i>     | REACTOME_EPIGENETIC_REGULATION_OF_GENE_EXPRESSION                    |
| 3:49406095   | <i>IP6K2</i>        | REACTOME_ERBB2_REGULATES_CELL_MOTILITY                               |
| 3:49424231   | <i>IP6K2</i>        | REACTOME_ERBB2_REGULATES_CELL_MOTILITY                               |
| 3:49450137   | <i>IP6K2</i>        | REACTOME_ERBB2_REGULATES_CELL_MOTILITY                               |
| 6:31862876   | <i>HLA-DRB5</i>     | REACTOME_ERCC6_CSB_AND_EHMT2_G9A_POSITIVELY_REGULATE_RRNA_EXPRESSION |
| 5:133558885  | <i>C5orf24</i>      | REACTOME_ERKS_ARE_INACTIVATED                                        |
| 17:41845031  | <i>FAM171A2</i>     | REACTOME_ERKS_ARE_INACTIVATED                                        |
| 6:32151443   | <i>HLA-DRB5</i>     | REACTOME_ER_QUALITY_CONTROL_COMPARTMENT_ERQC                         |
| 3:121411876  | <i>KPNA1</i>        | REACTOME_ER_TO_GOLGI_ANTEROGRADE_TRANSPORT                           |
| 3:121412702  | <i>KPNA1</i>        | REACTOME_ER_TO_GOLGI_ANTEROGRADE_TRANSPORT                           |
| 3:122986429  | <i>KPNA1</i>        | REACTOME_ER_TO_GOLGI_ANTEROGRADE_TRANSPORT                           |
| 4:76695927   | <i>FAM47E-STBD1</i> | REACTOME_ER_TO_GOLGI_ANTEROGRADE_TRANSPORT                           |
| 4:113947327  | <i>CAMK2D</i>       | REACTOME_ER_TO_GOLGI_ANTEROGRADE_TRANSPORT                           |
| 4:114015252  | <i>CAMK2D</i>       | REACTOME_ER_TO_GOLGI_ANTEROGRADE_TRANSPORT                           |
| 4:114032570  | <i>CAMK2D</i>       | REACTOME_ER_TO_GOLGI_ANTEROGRADE_TRANSPORT                           |
| 4:114067233  | <i>CAMK2D</i>       | REACTOME_ER_TO_GOLGI_ANTEROGRADE_TRANSPORT                           |
| 4:114077386  | <i>CAMK2D</i>       | REACTOME_ER_TO_GOLGI_ANTEROGRADE_TRANSPORT                           |
| 4:114113772  | <i>CAMK2D</i>       | REACTOME_ER_TO_GOLGI_ANTEROGRADE_TRANSPORT                           |
| 4:114122398  | <i>CAMK2D</i>       | REACTOME_ER_TO_GOLGI_ANTEROGRADE_TRANSPORT                           |
| 4:114172749  | <i>CAMK2D</i>       | REACTOME_ER_TO_GOLGI_ANTEROGRADE_TRANSPORT                           |
| 4:114217997  | <i>CAMK2D</i>       | REACTOME_ER_TO_GOLGI_ANTEROGRADE_TRANSPORT                           |
| 10:104005410 | <i>GBF1</i>         | REACTOME_ER_TO_GOLGI_ANTEROGRADE_TRANSPORT                           |
| 10:104034550 | <i>GBF1</i>         | REACTOME_ER_TO_GOLGI_ANTEROGRADE_TRANSPORT                           |
| 10:104258303 | <i>GBF1</i>         | REACTOME_ER_TO_GOLGI_ANTEROGRADE_TRANSPORT                           |
| 10:121669571 | <i>INPP5F</i>       | REACTOME_ER_TO_GOLGI_ANTEROGRADE_TRANSPORT                           |
| 10:121683206 | <i>INPP5F</i>       | REACTOME_ER_TO_GOLGI_ANTEROGRADE_TRANSPORT                           |

|              |                 |                                                                 |
|--------------|-----------------|-----------------------------------------------------------------|
| 10:121686714 | <i>INPP5F</i>   | REACTOME_ER_TO_GOLGI_ANTEROGRADE_TRANSPORT                      |
| 10:121689030 | <i>INPP5F</i>   | REACTOME_ER_TO_GOLGI_ANTEROGRADE_TRANSPORT                      |
| 17:44800946  | <i>WNT3</i>     | REACTOME_ER_TO_GOLGI_ANTEROGRADE_TRANSPORT                      |
| 17:44833217  | <i>WNT3</i>     | REACTOME_ER_TO_GOLGI_ANTEROGRADE_TRANSPORT                      |
| 17:45020426  | <i>WNT3</i>     | REACTOME_ER_TO_GOLGI_ANTEROGRADE_TRANSPORT                      |
| 17:45059032  | <i>WNT3</i>     | REACTOME_ER_TO_GOLGI_ANTEROGRADE_TRANSPORT                      |
| 17:45089680  | <i>WNT3</i>     | REACTOME_ER_TO_GOLGI_ANTEROGRADE_TRANSPORT                      |
| 17:42332803  | <i>FAM171A2</i> | REACTOME_ERYTHROCYTES_TAKE_UP_OXYGEN_AND_RELEASE_CARBON_DIOXIDE |
| 17:42338993  | <i>FAM171A2</i> | REACTOME_ERYTHROCYTES_TAKE_UP_OXYGEN_AND_RELEASE_CARBON_DIOXIDE |
| 17:40392358  | <i>RETREG3</i>  | REACTOME_ERYTHROPOIETIN_ACTIVATES_STAT5                         |
| 14:38061742  | <i>MIPOL1</i>   | REACTOME_ESR_MEDIATED_SIGNALING                                 |
| 19:2557113   | <i>SPPL2B</i>   | REACTOME_ESR_MEDIATED_SIGNALING                                 |
| 19:2563327   | <i>SPPL2B</i>   | REACTOME_ESR_MEDIATED_SIGNALING                                 |
| 19:2580057   | <i>SPPL2B</i>   | REACTOME_ESR_MEDIATED_SIGNALING                                 |
| 19:2660983   | <i>SPPL2B</i>   | REACTOME_ESR_MEDIATED_SIGNALING                                 |
| 14:38061742  | <i>MIPOL1</i>   | REACTOME_ESTROGEN_DEPENDENT_GENE_EXPRESSION                     |
| 17:7479140   | <i>V1NB1</i>    | REACTOME_EUKARYOTIC_TRANSLATION_INITIATION                      |
| 17:7480325   | <i>V1NB1</i>    | REACTOME_EUKARYOTIC_TRANSLATION_INITIATION                      |
| 12:133206648 | <i>FBRSL1</i>   | REACTOME_EXTENSION_OF_TELOMERES                                 |
| 12:133223685 | <i>FBRSL1</i>   | REACTOME_EXTENSION_OF_TELOMERES                                 |
| 1:155027082  | <i>GBAP1</i>    | REACTOME_EXTRACELLULAR_MATRIX_ORGANIZATION                      |
| 1:155033317  | <i>GBAP1</i>    | REACTOME_EXTRACELLULAR_MATRIX_ORGANIZATION                      |
| 3:49162284   | <i>IP6K2</i>    | REACTOME_EXTRACELLULAR_MATRIX_ORGANIZATION                      |
| 3:49162583   | <i>IP6K2</i>    | REACTOME_EXTRACELLULAR_MATRIX_ORGANIZATION                      |
| 3:49561208   | <i>IP6K2</i>    | REACTOME_EXTRACELLULAR_MATRIX_ORGANIZATION                      |
| 6:30850582   | <i>TRIM40</i>   | REACTOME_EXTRACELLULAR_MATRIX_ORGANIZATION                      |
| 6:32031904   | <i>HLA-DRB5</i> | REACTOME_EXTRACELLULAR_MATRIX_ORGANIZATION                      |
| 6:32062687   | <i>HLA-DRB5</i> | REACTOME_EXTRACELLULAR_MATRIX_ORGANIZATION                      |
| 6:33153528   | <i>HLA-DRB5</i> | REACTOME_EXTRACELLULAR_MATRIX_ORGANIZATION                      |
| 6:112494762  | <i>FYN</i>      | REACTOME_EXTRACELLULAR_MATRIX_ORGANIZATION                      |
| 6:112531401  | <i>FYN</i>      | REACTOME_EXTRACELLULAR_MATRIX_ORGANIZATION                      |
| 6:112561154  | <i>FYN</i>      | REACTOME_EXTRACELLULAR_MATRIX_ORGANIZATION                      |
| 6:112561430  | <i>FYN</i>      | REACTOME_EXTRACELLULAR_MATRIX_ORGANIZATION                      |
| 8:11712443   | <i>CTSB</i>     | REACTOME_EXTRACELLULAR_MATRIX_ORGANIZATION                      |
| 8:23190941   | <i>BIN3</i>     | REACTOME_EXTRACELLULAR_MATRIX_ORGANIZATION                      |
| 8:23212542   | <i>BIN3</i>     | REACTOME_EXTRACELLULAR_MATRIX_ORGANIZATION                      |
| 8:23216225   | <i>BIN3</i>     | REACTOME_EXTRACELLULAR_MATRIX_ORGANIZATION                      |
| 8:23223713   | <i>BIN3</i>     | REACTOME_EXTRACELLULAR_MATRIX_ORGANIZATION                      |
| 10:15562608  | <i>ITGA8</i>    | REACTOME_EXTRACELLULAR_MATRIX_ORGANIZATION                      |
| 10:15569598  | <i>ITGA8</i>    | REACTOME_EXTRACELLULAR_MATRIX_ORGANIZATION                      |
| 10:15652368  | <i>ITGA8</i>    | REACTOME_EXTRACELLULAR_MATRIX_ORGANIZATION                      |
| 11:133947732 | <i>IGSF9B</i>   | REACTOME_EXTRACELLULAR_MATRIX_ORGANIZATION                      |
| 14:75057014  | <i>RPS6KL1</i>  | REACTOME_EXTRACELLULAR_MATRIX_ORGANIZATION                      |
| 16:30510571  | <i>SETD1A</i>   | REACTOME_EXTRACELLULAR_MATRIX_ORGANIZATION                      |
| 16:30516492  | <i>SETD1A</i>   | REACTOME_EXTRACELLULAR_MATRIX_ORGANIZATION                      |
| 16:30520856  | <i>SETD1A</i>   | REACTOME_EXTRACELLULAR_MATRIX_ORGANIZATION                      |
| 16:31370452  | <i>SETD1A</i>   | REACTOME_EXTRACELLULAR_MATRIX_ORGANIZATION                      |
| 17:42454243  | <i>FAM171A2</i> | REACTOME_EXTRACELLULAR_MATRIX_ORGANIZATION                      |
| 17:76869878  | <i>DNAH17</i>   | REACTOME_EXTRACELLULAR_MATRIX_ORGANIZATION                      |
| 19:2557113   | <i>SPPL2B</i>   | REACTOME_EXTRA_NUCLEAR_ESTROGEN_SIGNALING                       |
| 19:2563327   | <i>SPPL2B</i>   | REACTOME_EXTRA_NUCLEAR_ESTROGEN_SIGNALING                       |
| 19:2580057   | <i>SPPL2B</i>   | REACTOME_EXTRA_NUCLEAR_ESTROGEN_SIGNALING                       |
| 19:2660983   | <i>SPPL2B</i>   | REACTOME_EXTRA_NUCLEAR_ESTROGEN_SIGNALING                       |

|              |                     |                                                                                |
|--------------|---------------------|--------------------------------------------------------------------------------|
| 3:48835245   | <i>IP6K2</i>        | REACTOME_FACTORS_INVOLVED_IN_MEGAKARYOCYTE_DEVELOPMENT_AND_PLATELET_PRODUCTION |
| 8:11558567   | <i>CTSB</i>         | REACTOME_FACTORS_INVOLVED_IN_MEGAKARYOCYTE_DEVELOPMENT_AND_PLATELET_PRODUCTION |
| 8:11599269   | <i>CTSB</i>         | REACTOME_FACTORS_INVOLVED_IN_MEGAKARYOCYTE_DEVELOPMENT_AND_PLATELET_PRODUCTION |
| 12:39759090  | <i>LRRK2_2</i>      | REACTOME_FACTORS_INVOLVED_IN_MEGAKARYOCYTE_DEVELOPMENT_AND_PLATELET_PRODUCTION |
| 12:39826709  | <i>LRRK2_2</i>      | REACTOME_FACTORS_INVOLVED_IN_MEGAKARYOCYTE_DEVELOPMENT_AND_PLATELET_PRODUCTION |
| 17:7578671   | <i>V1NB1</i>        | REACTOME_FACTORS_INVOLVED_IN_MEGAKARYOCYTE_DEVELOPMENT_AND_PLATELET_PRODUCTION |
| 17:43017194  | <i>CRHR1_2</i>      | REACTOME_FACTORS_INVOLVED_IN_MEGAKARYOCYTE_DEVELOPMENT_AND_PLATELET_PRODUCTION |
| 17:43021962  | <i>CRHR1_2</i>      | REACTOME_FACTORS_INVOLVED_IN_MEGAKARYOCYTE_DEVELOPMENT_AND_PLATELET_PRODUCTION |
| 4:169806784  | <i>CLCN3</i>        | REACTOME_FATTY_ACID_METABOLISM                                                 |
| 5:60053220   | <i>ELOVL7</i>       | REACTOME_FATTY_ACID_METABOLISM                                                 |
| 5:60085489   | <i>ELOVL7</i>       | REACTOME_FATTY_ACID_METABOLISM                                                 |
| 5:60093890   | <i>ELOVL7</i>       | REACTOME_FATTY_ACID_METABOLISM                                                 |
| 6:32126002   | <i>HLA-DRB5</i>     | REACTOME_FATTY_ACID_METABOLISM                                                 |
| 17:7983799   | <i>V1NB1</i>        | REACTOME_FATTY_ACID_METABOLISM                                                 |
| 17:8019125   | <i>V1NB1</i>        | REACTOME_FATTY_ACID_METABOLISM                                                 |
| 19:3142784   | <i>SPPL2B</i>       | REACTOME_FATTY_ACIDS_BOUND_TO_GPR40_FFAR1_REGULATE_INSULIN_SECRETION           |
| 19:3147326   | <i>SPPL2B</i>       | REACTOME_FATTY_ACIDS_BOUND_TO_GPR40_FFAR1_REGULATE_INSULIN_SECRETION           |
| 4:169806784  | <i>CLCN3</i>        | REACTOME_FATTY_ACYL_COA_BIOSYNTHESIS                                           |
| 5:60053220   | <i>ELOVL7</i>       | REACTOME_FATTY_ACYL_COA_BIOSYNTHESIS                                           |
| 5:60085489   | <i>ELOVL7</i>       | REACTOME_FATTY_ACYL_COA_BIOSYNTHESIS                                           |
| 5:60093890   | <i>ELOVL7</i>       | REACTOME_FATTY_ACYL_COA_BIOSYNTHESIS                                           |
| 6:32126002   | <i>HLA-DRB5</i>     | REACTOME_FATTY_ACYL_COA_BIOSYNTHESIS                                           |
| 6:112137847  | <i>FYN</i>          | REACTOME_FC_EPSILON_RECEPTOR_FCERI_SIGNALING                                   |
| 6:112151452  | <i>FYN</i>          | REACTOME_FC_EPSILON_RECEPTOR_FCERI_SIGNALING                                   |
| 6:112175069  | <i>FYN</i>          | REACTOME_FC_EPSILON_RECEPTOR_FCERI_SIGNALING                                   |
| 10:103185542 | <i>GBF1</i>         | REACTOME_FC_EPSILON_RECEPTOR_FCERI_SIGNALING                                   |
| 10:103305087 | <i>GBF1</i>         | REACTOME_FC_EPSILON_RECEPTOR_FCERI_SIGNALING                                   |
| 10:103308244 | <i>GBF1</i>         | REACTOME_FC_EPSILON_RECEPTOR_FCERI_SIGNALING                                   |
| 10:103185542 | <i>GBF1</i>         | REACTOME_FCERI_MEDIATED_NF_KB_ACTIVATION                                       |
| 10:103305087 | <i>GBF1</i>         | REACTOME_FCERI_MEDIATED_NF_KB_ACTIVATION                                       |
| 10:103308244 | <i>GBF1</i>         | REACTOME_FCERI_MEDIATED_NF_KB_ACTIVATION                                       |
| 6:112137847  | <i>FYN</i>          | REACTOME_FCGAMMA_RECEPTOR_FCGR_DEPENDENT_PHAGOCYTOSIS                          |
| 6:112151452  | <i>FYN</i>          | REACTOME_FCGAMMA_RECEPTOR_FCGR_DEPENDENT_PHAGOCYTOSIS                          |
| 6:112175069  | <i>FYN</i>          | REACTOME_FCGAMMA_RECEPTOR_FCGR_DEPENDENT_PHAGOCYTOSIS                          |
| 6:112137847  | <i>FYN</i>          | REACTOME_FCGR_ACTIVATION                                                       |
| 6:112151452  | <i>FYN</i>          | REACTOME_FCGR_ACTIVATION                                                       |
| 6:112175069  | <i>FYN</i>          | REACTOME_FCGR_ACTIVATION                                                       |
| 5:134307319  | <i>C5orf24</i>      | REACTOME_FERTILIZATION                                                         |
| 5:134315853  | <i>C5orf24</i>      | REACTOME_FERTILIZATION                                                         |
| 17:40392358  | <i>RETREG3</i>      | REACTOME_FGFR1_MUTANT_RECEPTOR_ACTIVATION                                      |
| 11:82582134  | <i>DLG2</i>         | REACTOME_FORMATION_OF_FIBRIN_CLOT_CLOTTING_CASCADE                             |
| 11:82635123  | <i>DLG2</i>         | REACTOME_FORMATION_OF_FIBRIN_CLOT_CLOTTING_CASCADE                             |
| 11:82648357  | <i>DLG2</i>         | REACTOME_FORMATION_OF_FIBRIN_CLOT_CLOTTING_CASCADE                             |
| 2:135708115  | <i>TMEM163</i>      | REACTOME_FORMATION_OF_HIV_ELONGATION_COMPLEX_IN_THE_ABSENCE_OF_HIV_TAT         |
| 6:31925679   | <i>HLA-DRB5</i>     | REACTOME_FORMATION_OF_HIV_ELONGATION_COMPLEX_IN_THE_ABSENCE_OF_HIV_TAT         |
| 1:226568665  | <i>ITPKB</i>        | REACTOME_FORMATION_OF_INCISION_COMPLEX_IN_GG_NER                               |
| 17:7578671   | <i>V1NB1</i>        | REACTOME_FORMATION_OF_SENESCENCE_ASSOCIATED_HETEROCHROMATIN_FOCI_SAHF          |
| 19:3008151   | <i>SPPL2B</i>       | REACTOME_FORMATION_OF_THE_BETA_CATENIN:TCF_TRANSACTIVATING_COMPLEX             |
| 19:3024077   | <i>SPPL2B</i>       | REACTOME_FORMATION_OF_THE_BETA_CATENIN:TCF_TRANSACTIVATING_COMPLEX             |
| 17:39883520  | <i>RETREG3</i>      | REACTOME_FORMATION_OF_THE_CORNIFIED_ENVELOPE                                   |
| 6:31925679   | <i>HLA-DRB5</i>     | REACTOME_FORMATION_OF_THE_EARLY_ELONGATION_COMPLEX                             |
| 4:78136299   | <i>FAM47E-STBD1</i> | REACTOME_FOXO_MEDIATED_TRANSCRIPTION_OF_CELL_CYCLE_GENES                       |
| 4:78175384   | <i>FAM47E-STBD1</i> | REACTOME_FOXO_MEDIATED_TRANSCRIPTION_OF_CELL_CYCLE_GENES                       |

|             |                     |                                                                                       |
|-------------|---------------------|---------------------------------------------------------------------------------------|
| 17:41056283 | <i>RETREG3</i>      | REACTOME_FOXO_MEDIATED_TRANSCRIPTION_OF_OXIDATIVE_STRESS_METABOLIC_AND_NEURONAL_GENES |
| 4:78136299  | <i>FAM47E-STBD1</i> | REACTOME_FOXO_MEDIATED_TRANSCRIPTION                                                  |
| 4:78175384  | <i>FAM47E-STBD1</i> | REACTOME_FOXO_MEDIATED_TRANSCRIPTION                                                  |
| 17:41056283 | <i>RETREG3</i>      | REACTOME_FOXO_MEDIATED_TRANSCRIPTION                                                  |
| 19:3142784  | <i>SPPL2B</i>       | REACTOME_FREE_FATTY_ACIDS_REGULATE_INSULIN_SECRETION                                  |
| 19:3147326  | <i>SPPL2B</i>       | REACTOME_FREE_FATTY_ACIDS_REGULATE_INSULIN_SECRETION                                  |
| 1:226497419 | <i>ITPKB</i>        | REACTOME_G0_AND_EARLY_G1                                                              |
| 3:48199695  | <i>IP6K2</i>        | REACTOME_G0_AND_EARLY_G1                                                              |
| 3:48214438  | <i>IP6K2</i>        | REACTOME_G0_AND_EARLY_G1                                                              |
| 14:74640180 | <i>RPS6KL1</i>      | REACTOME_G0_AND_EARLY_G1                                                              |
| 21:38740824 | <i>DYRK1A</i>       | REACTOME_G0_AND_EARLY_G1                                                              |
| 21:38753354 | <i>DYRK1A</i>       | REACTOME_G0_AND_EARLY_G1                                                              |
| 21:38770530 | <i>DYRK1A</i>       | REACTOME_G0_AND_EARLY_G1                                                              |
| 21:38783614 | <i>DYRK1A</i>       | REACTOME_G0_AND_EARLY_G1                                                              |
| 21:38814867 | <i>DYRK1A</i>       | REACTOME_G0_AND_EARLY_G1                                                              |
| 5:13355885  | <i>C5orf24</i>      | REACTOME_G1_PHASE                                                                     |
| 3:48199695  | <i>IP6K2</i>        | REACTOME_G1_S_DNA_DAMAGE_CHECKPOINTS                                                  |
| 3:48214438  | <i>IP6K2</i>        | REACTOME_G1_S_DNA_DAMAGE_CHECKPOINTS                                                  |
| 17:7578671  | <i>V1NB1</i>        | REACTOME_G1_S_DNA_DAMAGE_CHECKPOINTS                                                  |
| 1:226497419 | <i>ITPKB</i>        | REACTOME_G1_S_SPECIFIC_TRANSCRIPTION                                                  |
| 3:48199695  | <i>IP6K2</i>        | REACTOME_G1_S_SPECIFIC_TRANSCRIPTION                                                  |
| 3:48214438  | <i>IP6K2</i>        | REACTOME_G1_S_SPECIFIC_TRANSCRIPTION                                                  |
| 14:74640180 | <i>RPS6KL1</i>      | REACTOME_G1_S_SPECIFIC_TRANSCRIPTION                                                  |
| 17:76177567 | <i>DNAH17</i>       | REACTOME_G1_S_SPECIFIC_TRANSCRIPTION                                                  |
| 3:48199695  | <i>IP6K2</i>        | REACTOME_G2_M_CHECKPOINTS                                                             |
| 3:48214438  | <i>IP6K2</i>        | REACTOME_G2_M_CHECKPOINTS                                                             |
| 17:7578671  | <i>V1NB1</i>        | REACTOME_G2_M_CHECKPOINTS                                                             |
| 17:59791813 | <i>BRIP1</i>        | REACTOME_G2_M_CHECKPOINTS                                                             |
| 17:59922925 | <i>BRIP1</i>        | REACTOME_G2_M_CHECKPOINTS                                                             |
| 20:5934513  | <i>CRLS1</i>        | REACTOME_G2_M_CHECKPOINTS                                                             |
| 20:5935522  | <i>CRLS1</i>        | REACTOME_G2_M_CHECKPOINTS                                                             |
| 20:5968737  | <i>CRLS1</i>        | REACTOME_G2_M_CHECKPOINTS                                                             |
| 20:5968964  | <i>CRLS1</i>        | REACTOME_G2_M_CHECKPOINTS                                                             |
| 17:7578671  | <i>V1NB1</i>        | REACTOME_G2_M_DNA_DAMAGE_CHECKPOINT                                                   |
| 17:59791813 | <i>BRIP1</i>        | REACTOME_G2_M_DNA_DAMAGE_CHECKPOINT                                                   |
| 17:59922925 | <i>BRIP1</i>        | REACTOME_G2_M_DNA_DAMAGE_CHECKPOINT                                                   |
| 3:123089448 | <i>KPNA1</i>        | REACTOME_GABA_B_RECEPTOR_ACTIVATION                                                   |
| 6:29565889  | <i>TRIM40</i>       | REACTOME_GABA_B_RECEPTOR_ACTIVATION                                                   |
| 6:29590715  | <i>TRIM40</i>       | REACTOME_GABA_B_RECEPTOR_ACTIVATION                                                   |
| 8:131799767 | <i>FAM49B</i>       | REACTOME_GABA_B_RECEPTOR_ACTIVATION                                                   |
| 8:131845512 | <i>FAM49B</i>       | REACTOME_GABA_B_RECEPTOR_ACTIVATION                                                   |
| 8:131865425 | <i>FAM49B</i>       | REACTOME_GABA_B_RECEPTOR_ACTIVATION                                                   |
| 8:131901170 | <i>FAM49B</i>       | REACTOME_GABA_B_RECEPTOR_ACTIVATION                                                   |
| 16:50300511 | <i>CASC16</i>       | REACTOME_GABA_B_RECEPTOR_ACTIVATION                                                   |
| 16:50317039 | <i>CASC16</i>       | REACTOME_GABA_B_RECEPTOR_ACTIVATION                                                   |
| 19:2557113  | <i>SPPL2B</i>       | REACTOME_GABA_B_RECEPTOR_ACTIVATION                                                   |
| 19:2563327  | <i>SPPL2B</i>       | REACTOME_GABA_B_RECEPTOR_ACTIVATION                                                   |
| 19:2580057  | <i>SPPL2B</i>       | REACTOME_GABA_B_RECEPTOR_ACTIVATION                                                   |
| 19:2660983  | <i>SPPL2B</i>       | REACTOME_GABA_B_RECEPTOR_ACTIVATION                                                   |
| 21:38984964 | <i>DYRK1A</i>       | REACTOME_GABA_B_RECEPTOR_ACTIVATION                                                   |
| 21:39018136 | <i>DYRK1A</i>       | REACTOME_GABA_B_RECEPTOR_ACTIVATION                                                   |
| 21:39021814 | <i>DYRK1A</i>       | REACTOME_GABA_B_RECEPTOR_ACTIVATION                                                   |
| 21:39039956 | <i>DYRK1A</i>       | REACTOME_GABA_B_RECEPTOR_ACTIVATION                                                   |

|             |               |                                                          |
|-------------|---------------|----------------------------------------------------------|
| 21:39088785 | <i>DYRK1A</i> | REACTOME_GABA_B_RECEPTOR_ACTIVATION                      |
| 21:39108160 | <i>DYRK1A</i> | REACTOME_GABA_B_RECEPTOR_ACTIVATION                      |
| 21:39120480 | <i>DYRK1A</i> | REACTOME_GABA_B_RECEPTOR_ACTIVATION                      |
| 21:39134980 | <i>DYRK1A</i> | REACTOME_GABA_B_RECEPTOR_ACTIVATION                      |
| 21:39197323 | <i>DYRK1A</i> | REACTOME_GABA_B_RECEPTOR_ACTIVATION                      |
| 21:39217472 | <i>DYRK1A</i> | REACTOME_GABA_B_RECEPTOR_ACTIVATION                      |
| 3:123089448 | <i>KPNA1</i>  | REACTOME_GABA_RECEPTOR_ACTIVATION                        |
| 6:29565889  | <i>TRIM40</i> | REACTOME_GABA_RECEPTOR_ACTIVATION                        |
| 6:29590715  | <i>TRIM40</i> | REACTOME_GABA_RECEPTOR_ACTIVATION                        |
| 8:131799767 | <i>FAM49B</i> | REACTOME_GABA_RECEPTOR_ACTIVATION                        |
| 8:131845512 | <i>FAM49B</i> | REACTOME_GABA_RECEPTOR_ACTIVATION                        |
| 8:131865425 | <i>FAM49B</i> | REACTOME_GABA_RECEPTOR_ACTIVATION                        |
| 8:131901170 | <i>FAM49B</i> | REACTOME_GABA_RECEPTOR_ACTIVATION                        |
| 16:50300511 | <i>CASC16</i> | REACTOME_GABA_RECEPTOR_ACTIVATION                        |
| 16:50317039 | <i>CASC16</i> | REACTOME_GABA_RECEPTOR_ACTIVATION                        |
| 19:2557113  | <i>SPPL2B</i> | REACTOME_GABA_RECEPTOR_ACTIVATION                        |
| 19:2563327  | <i>SPPL2B</i> | REACTOME_GABA_RECEPTOR_ACTIVATION                        |
| 19:2580057  | <i>SPPL2B</i> | REACTOME_GABA_RECEPTOR_ACTIVATION                        |
| 19:2660983  | <i>SPPL2B</i> | REACTOME_GABA_RECEPTOR_ACTIVATION                        |
| 21:38984964 | <i>DYRK1A</i> | REACTOME_GABA_RECEPTOR_ACTIVATION                        |
| 21:39018136 | <i>DYRK1A</i> | REACTOME_GABA_RECEPTOR_ACTIVATION                        |
| 21:39021814 | <i>DYRK1A</i> | REACTOME_GABA_RECEPTOR_ACTIVATION                        |
| 21:39039956 | <i>DYRK1A</i> | REACTOME_GABA_RECEPTOR_ACTIVATION                        |
| 21:39088785 | <i>DYRK1A</i> | REACTOME_GABA_RECEPTOR_ACTIVATION                        |
| 21:39108160 | <i>DYRK1A</i> | REACTOME_GABA_RECEPTOR_ACTIVATION                        |
| 21:39120480 | <i>DYRK1A</i> | REACTOME_GABA_RECEPTOR_ACTIVATION                        |
| 21:39134980 | <i>DYRK1A</i> | REACTOME_GABA_RECEPTOR_ACTIVATION                        |
| 21:39197323 | <i>DYRK1A</i> | REACTOME_GABA_RECEPTOR_ACTIVATION                        |
| 21:39217472 | <i>DYRK1A</i> | REACTOME_GABA_RECEPTOR_ACTIVATION                        |
| 6:72646790  | <i>RIMS1</i>  | REACTOME_GABA_SYNTHESIS_RELEASE_REUPTAKE_AND_DEGRADATION |
| 6:72648340  | <i>RIMS1</i>  | REACTOME_GABA_SYNTHESIS_RELEASE_REUPTAKE_AND_DEGRADATION |
| 6:72686444  | <i>RIMS1</i>  | REACTOME_GABA_SYNTHESIS_RELEASE_REUPTAKE_AND_DEGRADATION |
| 6:72716358  | <i>RIMS1</i>  | REACTOME_GABA_SYNTHESIS_RELEASE_REUPTAKE_AND_DEGRADATION |
| 6:72904599  | <i>RIMS1</i>  | REACTOME_GABA_SYNTHESIS_RELEASE_REUPTAKE_AND_DEGRADATION |
| 6:72913435  | <i>RIMS1</i>  | REACTOME_GABA_SYNTHESIS_RELEASE_REUPTAKE_AND_DEGRADATION |
| 6:72930929  | <i>RIMS1</i>  | REACTOME_GABA_SYNTHESIS_RELEASE_REUPTAKE_AND_DEGRADATION |
| 6:72982289  | <i>RIMS1</i>  | REACTOME_GABA_SYNTHESIS_RELEASE_REUPTAKE_AND_DEGRADATION |
| 6:72986711  | <i>RIMS1</i>  | REACTOME_GABA_SYNTHESIS_RELEASE_REUPTAKE_AND_DEGRADATION |
| 6:73008061  | <i>RIMS1</i>  | REACTOME_GABA_SYNTHESIS_RELEASE_REUPTAKE_AND_DEGRADATION |
| 6:73060492  | <i>RIMS1</i>  | REACTOME_GABA_SYNTHESIS_RELEASE_REUPTAKE_AND_DEGRADATION |
| 1:155975202 | <i>GBAP1</i>  | REACTOME_G_ALPHA_12_13_SIGNALLING_EVENTS                 |
| 3:49406095  | <i>IP6K2</i>  | REACTOME_G_ALPHA_12_13_SIGNALLING_EVENTS                 |
| 3:49424231  | <i>IP6K2</i>  | REACTOME_G_ALPHA_12_13_SIGNALLING_EVENTS                 |
| 3:49450137  | <i>IP6K2</i>  | REACTOME_G_ALPHA_12_13_SIGNALLING_EVENTS                 |
| 19:2557113  | <i>SPPL2B</i> | REACTOME_G_ALPHA_12_13_SIGNALLING_EVENTS                 |
| 19:2563327  | <i>SPPL2B</i> | REACTOME_G_ALPHA_12_13_SIGNALLING_EVENTS                 |
| 19:2580057  | <i>SPPL2B</i> | REACTOME_G_ALPHA_12_13_SIGNALLING_EVENTS                 |
| 19:2660983  | <i>SPPL2B</i> | REACTOME_G_ALPHA_12_13_SIGNALLING_EVENTS                 |
| 2:170012307 | <i>STK39</i>  | REACTOME_G_ALPHA_I_SIGNALLING_EVENTS                     |
| 2:170028024 | <i>STK39</i>  | REACTOME_G_ALPHA_I_SIGNALLING_EVENTS                     |
| 2:170066424 | <i>STK39</i>  | REACTOME_G_ALPHA_I_SIGNALLING_EVENTS                     |
| 3:48835245  | <i>IP6K2</i>  | REACTOME_G_ALPHA_I_SIGNALLING_EVENTS                     |
| 3:123089448 | <i>KPNA1</i>  | REACTOME_G_ALPHA_I_SIGNALLING_EVENTS                     |

|              |                     |                                      |
|--------------|---------------------|--------------------------------------|
| 3:150935203  | <i>MED12L</i>       | REACTOME_G_ALPHA_I_SIGNALLING_EVENTS |
| 3:151090424  | <i>MED12L</i>       | REACTOME_G_ALPHA_I_SIGNALLING_EVENTS |
| 3:151099733  | <i>MED12L</i>       | REACTOME_G_ALPHA_I_SIGNALLING_EVENTS |
| 4:76924571   | <i>FAM47E-STBD1</i> | REACTOME_G_ALPHA_I_SIGNALLING_EVENTS |
| 4:114424939  | <i>CAMK2D</i>       | REACTOME_G_ALPHA_I_SIGNALLING_EVENTS |
| 4:114494052  | <i>CAMK2D</i>       | REACTOME_G_ALPHA_I_SIGNALLING_EVENTS |
| 4:114529492  | <i>CAMK2D</i>       | REACTOME_G_ALPHA_I_SIGNALLING_EVENTS |
| 4:114539964  | <i>CAMK2D</i>       | REACTOME_G_ALPHA_I_SIGNALLING_EVENTS |
| 4:114597918  | <i>CAMK2D</i>       | REACTOME_G_ALPHA_I_SIGNALLING_EVENTS |
| 5:59236972   | <i>ELOVL7</i>       | REACTOME_G_ALPHA_I_SIGNALLING_EVENTS |
| 5:59490965   | <i>ELOVL7</i>       | REACTOME_G_ALPHA_I_SIGNALLING_EVENTS |
| 5:59554719   | <i>ELOVL7</i>       | REACTOME_G_ALPHA_I_SIGNALLING_EVENTS |
| 5:59705316   | <i>ELOVL7</i>       | REACTOME_G_ALPHA_I_SIGNALLING_EVENTS |
| 5:59736085   | <i>ELOVL7</i>       | REACTOME_G_ALPHA_I_SIGNALLING_EVENTS |
| 5:59812853   | <i>ELOVL7</i>       | REACTOME_G_ALPHA_I_SIGNALLING_EVENTS |
| 5:133558885  | <i>C5orf24</i>      | REACTOME_G_ALPHA_I_SIGNALLING_EVENTS |
| 6:29565889   | <i>TRIM40</i>       | REACTOME_G_ALPHA_I_SIGNALLING_EVENTS |
| 6:29590715   | <i>TRIM40</i>       | REACTOME_G_ALPHA_I_SIGNALLING_EVENTS |
| 8:131799767  | <i>FAM49B</i>       | REACTOME_G_ALPHA_I_SIGNALLING_EVENTS |
| 8:131845512  | <i>FAM49B</i>       | REACTOME_G_ALPHA_I_SIGNALLING_EVENTS |
| 8:131865425  | <i>FAM49B</i>       | REACTOME_G_ALPHA_I_SIGNALLING_EVENTS |
| 8:131901170  | <i>FAM49B</i>       | REACTOME_G_ALPHA_I_SIGNALLING_EVENTS |
| 10:15199347  | <i>ITGA8</i>        | REACTOME_G_ALPHA_I_SIGNALLING_EVENTS |
| 10:121295884 | <i>INPP5F</i>       | REACTOME_G_ALPHA_I_SIGNALLING_EVENTS |
| 12:123110365 | <i>HIP1R</i>        | REACTOME_G_ALPHA_I_SIGNALLING_EVENTS |
| 12:123110785 | <i>HIP1R</i>        | REACTOME_G_ALPHA_I_SIGNALLING_EVENTS |
| 12:123139394 | <i>HIP1R</i>        | REACTOME_G_ALPHA_I_SIGNALLING_EVENTS |
| 12:123155263 | <i>HIP1R</i>        | REACTOME_G_ALPHA_I_SIGNALLING_EVENTS |
| 12:123165949 | <i>HIP1R</i>        | REACTOME_G_ALPHA_I_SIGNALLING_EVENTS |
| 12:123194636 | <i>HIP1R</i>        | REACTOME_G_ALPHA_I_SIGNALLING_EVENTS |
| 16:50300511  | <i>CASC16</i>       | REACTOME_G_ALPHA_I_SIGNALLING_EVENTS |
| 16:50317039  | <i>CASC16</i>       | REACTOME_G_ALPHA_I_SIGNALLING_EVENTS |
| 17:43181287  | <i>CRHR1_2</i>      | REACTOME_G_ALPHA_I_SIGNALLING_EVENTS |
| 17:43184627  | <i>CRHR1_2</i>      | REACTOME_G_ALPHA_I_SIGNALLING_EVENTS |
| 19:2557113   | <i>SPPL2B</i>       | REACTOME_G_ALPHA_I_SIGNALLING_EVENTS |
| 19:2563327   | <i>SPPL2B</i>       | REACTOME_G_ALPHA_I_SIGNALLING_EVENTS |
| 19:2580057   | <i>SPPL2B</i>       | REACTOME_G_ALPHA_I_SIGNALLING_EVENTS |
| 19:2660983   | <i>SPPL2B</i>       | REACTOME_G_ALPHA_I_SIGNALLING_EVENTS |
| 10:121054578 | <i>INPP5F</i>       | REACTOME_G_ALPHA_Q_SIGNALLING_EVENTS |
| 10:121077191 | <i>INPP5F</i>       | REACTOME_G_ALPHA_Q_SIGNALLING_EVENTS |
| 10:121085648 | <i>INPP5F</i>       | REACTOME_G_ALPHA_Q_SIGNALLING_EVENTS |
| 10:121104943 | <i>INPP5F</i>       | REACTOME_G_ALPHA_Q_SIGNALLING_EVENTS |
| 10:121114292 | <i>INPP5F</i>       | REACTOME_G_ALPHA_Q_SIGNALLING_EVENTS |
| 10:121191186 | <i>INPP5F</i>       | REACTOME_G_ALPHA_Q_SIGNALLING_EVENTS |
| 10:121201427 | <i>INPP5F</i>       | REACTOME_G_ALPHA_Q_SIGNALLING_EVENTS |
| 14:88472612  | <i>GALC</i>         | REACTOME_G_ALPHA_Q_SIGNALLING_EVENTS |
| 19:2557113   | <i>SPPL2B</i>       | REACTOME_G_ALPHA_Q_SIGNALLING_EVENTS |
| 19:2563327   | <i>SPPL2B</i>       | REACTOME_G_ALPHA_Q_SIGNALLING_EVENTS |
| 19:2580057   | <i>SPPL2B</i>       | REACTOME_G_ALPHA_Q_SIGNALLING_EVENTS |
| 19:2660983   | <i>SPPL2B</i>       | REACTOME_G_ALPHA_Q_SIGNALLING_EVENTS |
| 19:3142784   | <i>SPPL2B</i>       | REACTOME_G_ALPHA_Q_SIGNALLING_EVENTS |
| 19:3147326   | <i>SPPL2B</i>       | REACTOME_G_ALPHA_Q_SIGNALLING_EVENTS |
| 20:5290081   | <i>CRLS1</i>        | REACTOME_G_ALPHA_Q_SIGNALLING_EVENTS |

|              |         |                                                                              |
|--------------|---------|------------------------------------------------------------------------------|
| 3:123089448  | KPNA1   | REACTOME_G_ALPHA_S_SIGNALLING_EVENTS                                         |
| 5:59236972   | ELOVL7  | REACTOME_G_ALPHA_S_SIGNALLING_EVENTS                                         |
| 5:59490965   | ELOVL7  | REACTOME_G_ALPHA_S_SIGNALLING_EVENTS                                         |
| 5:59554719   | ELOVL7  | REACTOME_G_ALPHA_S_SIGNALLING_EVENTS                                         |
| 5:59705316   | ELOVL7  | REACTOME_G_ALPHA_S_SIGNALLING_EVENTS                                         |
| 5:59736085   | ELOVL7  | REACTOME_G_ALPHA_S_SIGNALLING_EVENTS                                         |
| 5:59812853   | ELOVL7  | REACTOME_G_ALPHA_S_SIGNALLING_EVENTS                                         |
| 6:29373213   | TRIM40  | REACTOME_G_ALPHA_S_SIGNALLING_EVENTS                                         |
| 6:29407378   | TRIM40  | REACTOME_G_ALPHA_S_SIGNALLING_EVENTS                                         |
| 6:29412222   | TRIM40  | REACTOME_G_ALPHA_S_SIGNALLING_EVENTS                                         |
| 8:131799767  | FAM49B  | REACTOME_G_ALPHA_S_SIGNALLING_EVENTS                                         |
| 8:131845512  | FAM49B  | REACTOME_G_ALPHA_S_SIGNALLING_EVENTS                                         |
| 8:131865425  | FAM49B  | REACTOME_G_ALPHA_S_SIGNALLING_EVENTS                                         |
| 8:131901170  | FAM49B  | REACTOME_G_ALPHA_S_SIGNALLING_EVENTS                                         |
| 10:121054578 | INPP5F  | REACTOME_G_ALPHA_S_SIGNALLING_EVENTS                                         |
| 10:121077191 | INPP5F  | REACTOME_G_ALPHA_S_SIGNALLING_EVENTS                                         |
| 10:121085648 | INPP5F  | REACTOME_G_ALPHA_S_SIGNALLING_EVENTS                                         |
| 10:121104943 | INPP5F  | REACTOME_G_ALPHA_S_SIGNALLING_EVENTS                                         |
| 10:121114292 | INPP5F  | REACTOME_G_ALPHA_S_SIGNALLING_EVENTS                                         |
| 10:121191186 | INPP5F  | REACTOME_G_ALPHA_S_SIGNALLING_EVENTS                                         |
| 10:121201427 | INPP5F  | REACTOME_G_ALPHA_S_SIGNALLING_EVENTS                                         |
| 16:50300511  | CASC16  | REACTOME_G_ALPHA_S_SIGNALLING_EVENTS                                         |
| 16:50317039  | CASC16  | REACTOME_G_ALPHA_S_SIGNALLING_EVENTS                                         |
| 17:43744203  | CRHR1_2 | REACTOME_G_ALPHA_S_SIGNALLING_EVENTS                                         |
| 17:43748712  | CRHR1_2 | REACTOME_G_ALPHA_S_SIGNALLING_EVENTS                                         |
| 17:43784228  | CRHR1_2 | REACTOME_G_ALPHA_S_SIGNALLING_EVENTS                                         |
| 17:43791502  | CRHR1_2 | REACTOME_G_ALPHA_S_SIGNALLING_EVENTS                                         |
| 17:43796210  | CRHR1_2 | REACTOME_G_ALPHA_S_SIGNALLING_EVENTS                                         |
| 17:43843861  | CRHR1_2 | REACTOME_G_ALPHA_S_SIGNALLING_EVENTS                                         |
| 17:43847503  | CRHR1_2 | REACTOME_G_ALPHA_S_SIGNALLING_EVENTS                                         |
| 17:43849514  | CRHR1_2 | REACTOME_G_ALPHA_S_SIGNALLING_EVENTS                                         |
| 19:2557113   | SPPL2B  | REACTOME_G_ALPHA_S_SIGNALLING_EVENTS                                         |
| 19:2563327   | SPPL2B  | REACTOME_G_ALPHA_S_SIGNALLING_EVENTS                                         |
| 19:2580057   | SPPL2B  | REACTOME_G_ALPHA_S_SIGNALLING_EVENTS                                         |
| 19:2660983   | SPPL2B  | REACTOME_G_ALPHA_S_SIGNALLING_EVENTS                                         |
| 3:123089448  | KPNA1   | REACTOME_G_ALPHA_Z_SIGNALLING_EVENTS                                         |
| 8:131799767  | FAM49B  | REACTOME_G_ALPHA_Z_SIGNALLING_EVENTS                                         |
| 8:131845512  | FAM49B  | REACTOME_G_ALPHA_Z_SIGNALLING_EVENTS                                         |
| 8:131865425  | FAM49B  | REACTOME_G_ALPHA_Z_SIGNALLING_EVENTS                                         |
| 8:131901170  | FAM49B  | REACTOME_G_ALPHA_Z_SIGNALLING_EVENTS                                         |
| 16:50300511  | CASC16  | REACTOME_G_ALPHA_Z_SIGNALLING_EVENTS                                         |
| 16:50317039  | CASC16  | REACTOME_G_ALPHA_Z_SIGNALLING_EVENTS                                         |
| 19:2557113   | SPPL2B  | REACTOME_G_ALPHA_Z_SIGNALLING_EVENTS                                         |
| 19:2563327   | SPPL2B  | REACTOME_G_ALPHA_Z_SIGNALLING_EVENTS                                         |
| 19:2580057   | SPPL2B  | REACTOME_G_ALPHA_Z_SIGNALLING_EVENTS                                         |
| 19:2660983   | SPPL2B  | REACTOME_G_ALPHA_Z_SIGNALLING_EVENTS                                         |
| 4:114899005  | CAMK2D  | REACTOME_GAMMA_CARBOXYLATION_HYPUSINE_FORMATION_AND_ARYLSULFATASE_ACTIVATION |
| 12:133206648 | FBRSL1  | REACTOME_GAP_FILLING_DNA_REPAIR_SYNTHESIS_AND_LIGATION_IN_GG_NER             |
| 12:133223685 | FBRSL1  | REACTOME_GAP_FILLING_DNA_REPAIR_SYNTHESIS_AND_LIGATION_IN_GG_NER             |
| 19:2557113   | SPPL2B  | REACTOME_G_BETA:GAMMA_SIGNALLING_THROUGH_CDC42                               |
| 19:2563327   | SPPL2B  | REACTOME_G_BETA:GAMMA_SIGNALLING_THROUGH_CDC42                               |
| 19:2580057   | SPPL2B  | REACTOME_G_BETA:GAMMA_SIGNALLING_THROUGH_CDC42                               |
| 19:2660983   | SPPL2B  | REACTOME_G_BETA:GAMMA_SIGNALLING_THROUGH_CDC42                               |

|             |                     |                                                    |
|-------------|---------------------|----------------------------------------------------|
| 3:49406095  | <i>IP6K2</i>        | REACTOME_G_BETA:GAMMA_SIGNALLING_THROUGH_PI3KGAMMA |
| 3:49424231  | <i>IP6K2</i>        | REACTOME_G_BETA:GAMMA_SIGNALLING_THROUGH_PI3KGAMMA |
| 3:49450137  | <i>IP6K2</i>        | REACTOME_G_BETA:GAMMA_SIGNALLING_THROUGH_PI3KGAMMA |
| 19:2557113  | <i>SPPL2B</i>       | REACTOME_G_BETA:GAMMA_SIGNALLING_THROUGH_PI3KGAMMA |
| 19:2563327  | <i>SPPL2B</i>       | REACTOME_G_BETA:GAMMA_SIGNALLING_THROUGH_PI3KGAMMA |
| 19:2580057  | <i>SPPL2B</i>       | REACTOME_G_BETA:GAMMA_SIGNALLING_THROUGH_PI3KGAMMA |
| 19:2660983  | <i>SPPL2B</i>       | REACTOME_G_BETA:GAMMA_SIGNALLING_THROUGH_PI3KGAMMA |
| 1:226568665 | <i>ITPKB</i>        | REACTOME_GENE_EXPRESSION_TRANSCRIPTION             |
| 1:227754686 | <i>ITPKB</i>        | REACTOME_GENE_EXPRESSION_TRANSCRIPTION             |
| 1:227804041 | <i>ITPKB</i>        | REACTOME_GENE_EXPRESSION_TRANSCRIPTION             |
| 2:135708115 | <i>TMEM163</i>      | REACTOME_GENE_EXPRESSION_TRANSCRIPTION             |
| 4:78136299  | <i>FAM47E-STBD1</i> | REACTOME_GENE_EXPRESSION_TRANSCRIPTION             |
| 4:78175384  | <i>FAM47E-STBD1</i> | REACTOME_GENE_EXPRESSION_TRANSCRIPTION             |
| 4:114424939 | <i>CAMK2D</i>       | REACTOME_GENE_EXPRESSION_TRANSCRIPTION             |
| 4:114494052 | <i>CAMK2D</i>       | REACTOME_GENE_EXPRESSION_TRANSCRIPTION             |
| 4:114529492 | <i>CAMK2D</i>       | REACTOME_GENE_EXPRESSION_TRANSCRIPTION             |
| 4:114539964 | <i>CAMK2D</i>       | REACTOME_GENE_EXPRESSION_TRANSCRIPTION             |
| 4:114597918 | <i>CAMK2D</i>       | REACTOME_GENE_EXPRESSION_TRANSCRIPTION             |
| 5:133558885 | <i>C5orf24</i>      | REACTOME_GENE_EXPRESSION_TRANSCRIPTION             |
| 6:28117331  | <i>LOC100131289</i> | REACTOME_GENE_EXPRESSION_TRANSCRIPTION             |
| 6:28223680  | <i>LOC100131289</i> | REACTOME_GENE_EXPRESSION_TRANSCRIPTION             |
| 6:31862876  | <i>HLA-DRB5</i>     | REACTOME_GENE_EXPRESSION_TRANSCRIPTION             |
| 6:31925679  | <i>HLA-DRB5</i>     | REACTOME_GENE_EXPRESSION_TRANSCRIPTION             |
| 6:32179319  | <i>HLA-DRB5</i>     | REACTOME_GENE_EXPRESSION_TRANSCRIPTION             |
| 6:32186193  | <i>HLA-DRB5</i>     | REACTOME_GENE_EXPRESSION_TRANSCRIPTION             |
| 6:32941506  | <i>HLA-DRB5</i>     | REACTOME_GENE_EXPRESSION_TRANSCRIPTION             |
| 6:33287183  | <i>HLA-DRB5</i>     | REACTOME_GENE_EXPRESSION_TRANSCRIPTION             |
| 6:33381459  | <i>HLA-DRB5</i>     | REACTOME_GENE_EXPRESSION_TRANSCRIPTION             |
| 8:11353586  | <i>CTSB</i>         | REACTOME_GENE_EXPRESSION_TRANSCRIPTION             |
| 8:11363667  | <i>CTSB</i>         | REACTOME_GENE_EXPRESSION_TRANSCRIPTION             |
| 8:11381148  | <i>CTSB</i>         | REACTOME_GENE_EXPRESSION_TRANSCRIPTION             |
| 8:11558567  | <i>CTSB</i>         | REACTOME_GENE_EXPRESSION_TRANSCRIPTION             |
| 8:11599269  | <i>CTSB</i>         | REACTOME_GENE_EXPRESSION_TRANSCRIPTION             |
| 8:22108784  | <i>BIN3</i>         | REACTOME_GENE_EXPRESSION_TRANSCRIPTION             |
| 8:22974278  | <i>BIN3</i>         | REACTOME_GENE_EXPRESSION_TRANSCRIPTION             |
| 8:23050400  | <i>BIN3</i>         | REACTOME_GENE_EXPRESSION_TRANSCRIPTION             |
| 12:46134812 | <i>SCAF11</i>       | REACTOME_GENE_EXPRESSION_TRANSCRIPTION             |
| 12:46206268 | <i>SCAF11</i>       | REACTOME_GENE_EXPRESSION_TRANSCRIPTION             |
| 14:55515304 | <i>GCH1</i>         | REACTOME_GENE_EXPRESSION_TRANSCRIPTION             |
| 15:61016235 | <i>VPS13C</i>       | REACTOME_GENE_EXPRESSION_TRANSCRIPTION             |
| 15:61065568 | <i>VPS13C</i>       | REACTOME_GENE_EXPRESSION_TRANSCRIPTION             |
| 15:61094298 | <i>VPS13C</i>       | REACTOME_GENE_EXPRESSION_TRANSCRIPTION             |
| 15:61140736 | <i>VPS13C</i>       | REACTOME_GENE_EXPRESSION_TRANSCRIPTION             |
| 15:61142062 | <i>VPS13C</i>       | REACTOME_GENE_EXPRESSION_TRANSCRIPTION             |
| 15:61162571 | <i>VPS13C</i>       | REACTOME_GENE_EXPRESSION_TRANSCRIPTION             |
| 15:61191617 | <i>VPS13C</i>       | REACTOME_GENE_EXPRESSION_TRANSCRIPTION             |
| 15:61195427 | <i>VPS13C</i>       | REACTOME_GENE_EXPRESSION_TRANSCRIPTION             |
| 15:61221682 | <i>VPS13C</i>       | REACTOME_GENE_EXPRESSION_TRANSCRIPTION             |
| 15:61298486 | <i>VPS13C</i>       | REACTOME_GENE_EXPRESSION_TRANSCRIPTION             |
| 15:61375480 | <i>VPS13C</i>       | REACTOME_GENE_EXPRESSION_TRANSCRIPTION             |
| 15:61434581 | <i>VPS13C</i>       | REACTOME_GENE_EXPRESSION_TRANSCRIPTION             |
| 15:61467078 | <i>VPS13C</i>       | REACTOME_GENE_EXPRESSION_TRANSCRIPTION             |
| 15:61470808 | <i>VPS13C</i>       | REACTOME_GENE_EXPRESSION_TRANSCRIPTION             |

|             |                     |                                                   |
|-------------|---------------------|---------------------------------------------------|
| 15:61500263 | <i>VPS13C</i>       | REACTOME_GENE_EXPRESSION_TRANSCRIPTION            |
| 16:30438930 | <i>SETD1A</i>       | REACTOME_GENE_EXPRESSION_TRANSCRIPTION            |
| 16:30510571 | <i>SETD1A</i>       | REACTOME_GENE_EXPRESSION_TRANSCRIPTION            |
| 16:30516492 | <i>SETD1A</i>       | REACTOME_GENE_EXPRESSION_TRANSCRIPTION            |
| 16:30520856 | <i>SETD1A</i>       | REACTOME_GENE_EXPRESSION_TRANSCRIPTION            |
| 16:31753463 | <i>SETD1A</i>       | REACTOME_GENE_EXPRESSION_TRANSCRIPTION            |
| 17:7578671  | <i>V1NB1</i>        | REACTOME_GENE_EXPRESSION_TRANSCRIPTION            |
| 17:41056283 | <i>RETREG3</i>      | REACTOME_GENE_EXPRESSION_TRANSCRIPTION            |
| 17:42454243 | <i>FAM171A2</i>     | REACTOME_GENE_EXPRESSION_TRANSCRIPTION            |
| 17:59791813 | <i>BRIP1</i>        | REACTOME_GENE_EXPRESSION_TRANSCRIPTION            |
| 17:59922925 | <i>BRIP1</i>        | REACTOME_GENE_EXPRESSION_TRANSCRIPTION            |
| 17:59967940 | <i>BRIP1</i>        | REACTOME_GENE_EXPRESSION_TRANSCRIPTION            |
| 17:60124582 | <i>BRIP1</i>        | REACTOME_GENE_EXPRESSION_TRANSCRIPTION            |
| 19:1611856  | <i>SPPL2B</i>       | REACTOME_GENE_EXPRESSION_TRANSCRIPTION            |
| 6:32602372  | <i>HLA-DRB5</i>     | REACTOME_GENERATION_OF_SECOND_MESSENGER_MOLECULES |
| 1:226568665 | <i>ITPKB</i>        | REACTOME_GENERIC_TRANSCRIPTION_PATHWAY            |
| 1:227754686 | <i>ITPKB</i>        | REACTOME_GENERIC_TRANSCRIPTION_PATHWAY            |
| 1:227804041 | <i>ITPKB</i>        | REACTOME_GENERIC_TRANSCRIPTION_PATHWAY            |
| 2:135708115 | <i>TMEM163</i>      | REACTOME_GENERIC_TRANSCRIPTION_PATHWAY            |
| 4:78136299  | <i>FAM47E-STBD1</i> | REACTOME_GENERIC_TRANSCRIPTION_PATHWAY            |
| 4:78175384  | <i>FAM47E-STBD1</i> | REACTOME_GENERIC_TRANSCRIPTION_PATHWAY            |
| 4:114424939 | <i>CAMK2D</i>       | REACTOME_GENERIC_TRANSCRIPTION_PATHWAY            |
| 4:114494052 | <i>CAMK2D</i>       | REACTOME_GENERIC_TRANSCRIPTION_PATHWAY            |
| 4:114529492 | <i>CAMK2D</i>       | REACTOME_GENERIC_TRANSCRIPTION_PATHWAY            |
| 4:114539964 | <i>CAMK2D</i>       | REACTOME_GENERIC_TRANSCRIPTION_PATHWAY            |
| 4:114597918 | <i>CAMK2D</i>       | REACTOME_GENERIC_TRANSCRIPTION_PATHWAY            |
| 5:133558885 | <i>C5orf24</i>      | REACTOME_GENERIC_TRANSCRIPTION_PATHWAY            |
| 6:28117331  | <i>LOC100131289</i> | REACTOME_GENERIC_TRANSCRIPTION_PATHWAY            |
| 6:28223680  | <i>LOC100131289</i> | REACTOME_GENERIC_TRANSCRIPTION_PATHWAY            |
| 6:31862876  | <i>HLA-DRB5</i>     | REACTOME_GENERIC_TRANSCRIPTION_PATHWAY            |
| 6:31925679  | <i>HLA-DRB5</i>     | REACTOME_GENERIC_TRANSCRIPTION_PATHWAY            |
| 6:32179319  | <i>HLA-DRB5</i>     | REACTOME_GENERIC_TRANSCRIPTION_PATHWAY            |
| 6:32186193  | <i>HLA-DRB5</i>     | REACTOME_GENERIC_TRANSCRIPTION_PATHWAY            |
| 6:32941506  | <i>HLA-DRB5</i>     | REACTOME_GENERIC_TRANSCRIPTION_PATHWAY            |
| 6:33287183  | <i>HLA-DRB5</i>     | REACTOME_GENERIC_TRANSCRIPTION_PATHWAY            |
| 8:11353586  | <i>CTSB</i>         | REACTOME_GENERIC_TRANSCRIPTION_PATHWAY            |
| 8:11363667  | <i>CTSB</i>         | REACTOME_GENERIC_TRANSCRIPTION_PATHWAY            |
| 8:11381148  | <i>CTSB</i>         | REACTOME_GENERIC_TRANSCRIPTION_PATHWAY            |
| 8:11558567  | <i>CTSB</i>         | REACTOME_GENERIC_TRANSCRIPTION_PATHWAY            |
| 8:11599269  | <i>CTSB</i>         | REACTOME_GENERIC_TRANSCRIPTION_PATHWAY            |
| 8:22974278  | <i>BIN3</i>         | REACTOME_GENERIC_TRANSCRIPTION_PATHWAY            |
| 8:23050400  | <i>BIN3</i>         | REACTOME_GENERIC_TRANSCRIPTION_PATHWAY            |
| 12:46134812 | <i>SCAF11</i>       | REACTOME_GENERIC_TRANSCRIPTION_PATHWAY            |
| 12:46206268 | <i>SCAF11</i>       | REACTOME_GENERIC_TRANSCRIPTION_PATHWAY            |
| 14:55515304 | <i>GCH1</i>         | REACTOME_GENERIC_TRANSCRIPTION_PATHWAY            |
| 15:61016235 | <i>VPS13C</i>       | REACTOME_GENERIC_TRANSCRIPTION_PATHWAY            |
| 15:61065568 | <i>VPS13C</i>       | REACTOME_GENERIC_TRANSCRIPTION_PATHWAY            |
| 15:61094298 | <i>VPS13C</i>       | REACTOME_GENERIC_TRANSCRIPTION_PATHWAY            |
| 15:61140736 | <i>VPS13C</i>       | REACTOME_GENERIC_TRANSCRIPTION_PATHWAY            |
| 15:61142062 | <i>VPS13C</i>       | REACTOME_GENERIC_TRANSCRIPTION_PATHWAY            |
| 15:61162571 | <i>VPS13C</i>       | REACTOME_GENERIC_TRANSCRIPTION_PATHWAY            |
| 15:61191617 | <i>VPS13C</i>       | REACTOME_GENERIC_TRANSCRIPTION_PATHWAY            |
| 15:61195427 | <i>VPS13C</i>       | REACTOME_GENERIC_TRANSCRIPTION_PATHWAY            |

|              |          |                                                                   |
|--------------|----------|-------------------------------------------------------------------|
| 15:61221682  | VPS13C   | REACTOME_GENERIC_TRANSCRIPTION_PATHWAY                            |
| 15:61298486  | VPS13C   | REACTOME_GENERIC_TRANSCRIPTION_PATHWAY                            |
| 15:61375480  | VPS13C   | REACTOME_GENERIC_TRANSCRIPTION_PATHWAY                            |
| 15:61434581  | VPS13C   | REACTOME_GENERIC_TRANSCRIPTION_PATHWAY                            |
| 15:61467078  | VPS13C   | REACTOME_GENERIC_TRANSCRIPTION_PATHWAY                            |
| 15:61470808  | VPS13C   | REACTOME_GENERIC_TRANSCRIPTION_PATHWAY                            |
| 15:61500263  | VPS13C   | REACTOME_GENERIC_TRANSCRIPTION_PATHWAY                            |
| 16:30438930  | SETD1A   | REACTOME_GENERIC_TRANSCRIPTION_PATHWAY                            |
| 16:30510571  | SETD1A   | REACTOME_GENERIC_TRANSCRIPTION_PATHWAY                            |
| 16:30516492  | SETD1A   | REACTOME_GENERIC_TRANSCRIPTION_PATHWAY                            |
| 16:30520856  | SETD1A   | REACTOME_GENERIC_TRANSCRIPTION_PATHWAY                            |
| 16:31753463  | SETD1A   | REACTOME_GENERIC_TRANSCRIPTION_PATHWAY                            |
| 17:7578671   | V1NB1    | REACTOME_GENERIC_TRANSCRIPTION_PATHWAY                            |
| 17:41056283  | RETREG3  | REACTOME_GENERIC_TRANSCRIPTION_PATHWAY                            |
| 17:42454243  | FAM171A2 | REACTOME_GENERIC_TRANSCRIPTION_PATHWAY                            |
| 17:59791813  | BRIP1    | REACTOME_GENERIC_TRANSCRIPTION_PATHWAY                            |
| 17:59922925  | BRIP1    | REACTOME_GENERIC_TRANSCRIPTION_PATHWAY                            |
| 17:60124582  | BRIP1    | REACTOME_GENERIC_TRANSCRIPTION_PATHWAY                            |
| 19:1611856   | SPPL2B   | REACTOME_GENERIC_TRANSCRIPTION_PATHWAY                            |
| 1:226568665  | ITPKB    | REACTOME_GLOBAL_GENOME_NUCLEOTIDE_EXCISION_REPAIR_GG_NER          |
| 12:133206648 | FBRSL1   | REACTOME_GLOBAL_GENOME_NUCLEOTIDE_EXCISION_REPAIR_GG_NER          |
| 12:133223685 | FBRSL1   | REACTOME_GLOBAL_GENOME_NUCLEOTIDE_EXCISION_REPAIR_GG_NER          |
| 2:18091890   | KCNS3    | REACTOME_GLUCAGON_LIKE_PEPTIDE_1_GLP1_REGULATES_INSULIN_SECRETION |
| 2:18130187   | KCNS3    | REACTOME_GLUCAGON_LIKE_PEPTIDE_1_GLP1_REGULATES_INSULIN_SECRETION |
| 2:18141542   | KCNS3    | REACTOME_GLUCAGON_LIKE_PEPTIDE_1_GLP1_REGULATES_INSULIN_SECRETION |
| 2:18143082   | KCNS3    | REACTOME_GLUCAGON_LIKE_PEPTIDE_1_GLP1_REGULATES_INSULIN_SECRETION |
| 2:18176120   | KCNS3    | REACTOME_GLUCAGON_LIKE_PEPTIDE_1_GLP1_REGULATES_INSULIN_SECRETION |
| 2:18247777   | KCNS3    | REACTOME_GLUCAGON_LIKE_PEPTIDE_1_GLP1_REGULATES_INSULIN_SECRETION |
| 2:18299564   | KCNS3    | REACTOME_GLUCAGON_LIKE_PEPTIDE_1_GLP1_REGULATES_INSULIN_SECRETION |
| 2:18315537   | KCNS3    | REACTOME_GLUCAGON_LIKE_PEPTIDE_1_GLP1_REGULATES_INSULIN_SECRETION |
| 2:18335515   | KCNS3    | REACTOME_GLUCAGON_LIKE_PEPTIDE_1_GLP1_REGULATES_INSULIN_SECRETION |
| 2:18455049   | KCNS3    | REACTOME_GLUCAGON_LIKE_PEPTIDE_1_GLP1_REGULATES_INSULIN_SECRETION |
| 2:18472861   | KCNS3    | REACTOME_GLUCAGON_LIKE_PEPTIDE_1_GLP1_REGULATES_INSULIN_SECRETION |
| 3:48835245   | IP6K2    | REACTOME_GLUCAGON_LIKE_PEPTIDE_1_GLP1_REGULATES_INSULIN_SECRETION |
| 3:123089448  | KPNA1    | REACTOME_GLUCAGON_LIKE_PEPTIDE_1_GLP1_REGULATES_INSULIN_SECRETION |
| 8:131799767  | FAM49B   | REACTOME_GLUCAGON_LIKE_PEPTIDE_1_GLP1_REGULATES_INSULIN_SECRETION |
| 8:131845512  | FAM49B   | REACTOME_GLUCAGON_LIKE_PEPTIDE_1_GLP1_REGULATES_INSULIN_SECRETION |
| 8:131865425  | FAM49B   | REACTOME_GLUCAGON_LIKE_PEPTIDE_1_GLP1_REGULATES_INSULIN_SECRETION |
| 8:131901170  | FAM49B   | REACTOME_GLUCAGON_LIKE_PEPTIDE_1_GLP1_REGULATES_INSULIN_SECRETION |
| 19:2557113   | SPPL2B   | REACTOME_GLUCAGON_LIKE_PEPTIDE_1_GLP1_REGULATES_INSULIN_SECRETION |
| 19:2563327   | SPPL2B   | REACTOME_GLUCAGON_LIKE_PEPTIDE_1_GLP1_REGULATES_INSULIN_SECRETION |
| 19:2580057   | SPPL2B   | REACTOME_GLUCAGON_LIKE_PEPTIDE_1_GLP1_REGULATES_INSULIN_SECRETION |
| 19:2660983   | SPPL2B   | REACTOME_GLUCAGON_LIKE_PEPTIDE_1_GLP1_REGULATES_INSULIN_SECRETION |
| 3:48835245   | IP6K2    | REACTOME_GLUCAGON_SIGNALING_IN_METABOLIC_REGULATION               |
| 3:123089448  | KPNA1    | REACTOME_GLUCAGON_SIGNALING_IN_METABOLIC_REGULATION               |
| 8:131799767  | FAM49B   | REACTOME_GLUCAGON_SIGNALING_IN_METABOLIC_REGULATION               |
| 8:131845512  | FAM49B   | REACTOME_GLUCAGON_SIGNALING_IN_METABOLIC_REGULATION               |
| 8:131865425  | FAM49B   | REACTOME_GLUCAGON_SIGNALING_IN_METABOLIC_REGULATION               |
| 8:131901170  | FAM49B   | REACTOME_GLUCAGON_SIGNALING_IN_METABOLIC_REGULATION               |
| 16:50300511  | CASC16   | REACTOME_GLUCAGON_SIGNALING_IN_METABOLIC_REGULATION               |
| 16:50317039  | CASC16   | REACTOME_GLUCAGON_SIGNALING_IN_METABOLIC_REGULATION               |
| 19:2557113   | SPPL2B   | REACTOME_GLUCAGON_SIGNALING_IN_METABOLIC_REGULATION               |
| 19:2563327   | SPPL2B   | REACTOME_GLUCAGON_SIGNALING_IN_METABOLIC_REGULATION               |

|              |                     |                                                                                 |
|--------------|---------------------|---------------------------------------------------------------------------------|
| 19:2580057   | <i>SPPL2B</i>       | REACTOME_GLUCAGON_SIGNALING_IN_METABOLIC_REGULATION                             |
| 19:2660983   | <i>SPPL2B</i>       | REACTOME_GLUCAGON_SIGNALING_IN_METABOLIC_REGULATION                             |
| 19:2557113   | <i>SPPL2B</i>       | REACTOME_GLUCAGON_TYPE_LIGAND_RECEPTORS                                         |
| 19:2563327   | <i>SPPL2B</i>       | REACTOME_GLUCAGON_TYPE_LIGAND_RECEPTORS                                         |
| 19:2580057   | <i>SPPL2B</i>       | REACTOME_GLUCAGON_TYPE_LIGAND_RECEPTORS                                         |
| 19:2660983   | <i>SPPL2B</i>       | REACTOME_GLUCAGON_TYPE_LIGAND_RECEPTORS                                         |
| 10:104591639 | <i>GBF1</i>         | REACTOME_GLUCOCORTICOID_BIOSYNTHESIS                                            |
| 17:41056283  | <i>RETREG3</i>      | REACTOME_GLUONEOGENESIS                                                         |
| 5:133558885  | <i>C5orf24</i>      | REACTOME_GLUCOSE_METABOLISM                                                     |
| 17:41056283  | <i>RETREG3</i>      | REACTOME_GLUCOSE_METABOLISM                                                     |
| 1:226108200  | <i>ITPKB</i>        | REACTOME_GLUTAMATE_AND_GLUTAMINE_METABOLISM                                     |
| 4:114424939  | <i>CAMK2D</i>       | REACTOME_GLUTAMATE_BINDING_ACTIVATION_OF_AMPA_RECEPTORS_AND_SYNAPTIC_PLASTICITY |
| 4:114494052  | <i>CAMK2D</i>       | REACTOME_GLUTAMATE_BINDING_ACTIVATION_OF_AMPA_RECEPTORS_AND_SYNAPTIC_PLASTICITY |
| 4:114529492  | <i>CAMK2D</i>       | REACTOME_GLUTAMATE_BINDING_ACTIVATION_OF_AMPA_RECEPTORS_AND_SYNAPTIC_PLASTICITY |
| 4:114539964  | <i>CAMK2D</i>       | REACTOME_GLUTAMATE_BINDING_ACTIVATION_OF_AMPA_RECEPTORS_AND_SYNAPTIC_PLASTICITY |
| 4:114597918  | <i>CAMK2D</i>       | REACTOME_GLUTAMATE_BINDING_ACTIVATION_OF_AMPA_RECEPTORS_AND_SYNAPTIC_PLASTICITY |
| 17:7101771   | <i>V1NB1</i>        | REACTOME_GLUTAMATE_BINDING_ACTIVATION_OF_AMPA_RECEPTORS_AND_SYNAPTIC_PLASTICITY |
| 17:44800946  | <i>WNT3</i>         | REACTOME_GLUTAMATE_BINDING_ACTIVATION_OF_AMPA_RECEPTORS_AND_SYNAPTIC_PLASTICITY |
| 17:44833217  | <i>WNT3</i>         | REACTOME_GLUTAMATE_BINDING_ACTIVATION_OF_AMPA_RECEPTORS_AND_SYNAPTIC_PLASTICITY |
| 6:72646790   | <i>RIMS1</i>        | REACTOME_GLUTAMATE_NEUROTRANSMITTER_RELEASE_CYCLE                               |
| 6:72648340   | <i>RIMS1</i>        | REACTOME_GLUTAMATE_NEUROTRANSMITTER_RELEASE_CYCLE                               |
| 6:72686444   | <i>RIMS1</i>        | REACTOME_GLUTAMATE_NEUROTRANSMITTER_RELEASE_CYCLE                               |
| 6:72716358   | <i>RIMS1</i>        | REACTOME_GLUTAMATE_NEUROTRANSMITTER_RELEASE_CYCLE                               |
| 6:72904599   | <i>RIMS1</i>        | REACTOME_GLUTAMATE_NEUROTRANSMITTER_RELEASE_CYCLE                               |
| 6:72913435   | <i>RIMS1</i>        | REACTOME_GLUTAMATE_NEUROTRANSMITTER_RELEASE_CYCLE                               |
| 6:72930929   | <i>RIMS1</i>        | REACTOME_GLUTAMATE_NEUROTRANSMITTER_RELEASE_CYCLE                               |
| 6:72982289   | <i>RIMS1</i>        | REACTOME_GLUTAMATE_NEUROTRANSMITTER_RELEASE_CYCLE                               |
| 6:72986711   | <i>RIMS1</i>        | REACTOME_GLUTAMATE_NEUROTRANSMITTER_RELEASE_CYCLE                               |
| 6:73008061   | <i>RIMS1</i>        | REACTOME_GLUTAMATE_NEUROTRANSMITTER_RELEASE_CYCLE                               |
| 6:73060492   | <i>RIMS1</i>        | REACTOME_GLUTAMATE_NEUROTRANSMITTER_RELEASE_CYCLE                               |
| 2:96858914   | <i>KCNIP3</i>       | REACTOME_GLYCEROPHOSPHOLIPID_BIOSYNTHESIS                                       |
| 6:31846234   | <i>HLA-DRB5</i>     | REACTOME_GLYCEROPHOSPHOLIPID_BIOSYNTHESIS                                       |
| 12:123561638 | <i>HIP1R</i>        | REACTOME_GLYCEROPHOSPHOLIPID_BIOSYNTHESIS                                       |
| 12:123585705 | <i>HIP1R</i>        | REACTOME_GLYCEROPHOSPHOLIPID_BIOSYNTHESIS                                       |
| 16:29871730  | <i>CD19</i>         | REACTOME_GLYCEROPHOSPHOLIPID_BIOSYNTHESIS                                       |
| 17:6370241   | <i>V1NB1</i>        | REACTOME_GLYCEROPHOSPHOLIPID_BIOSYNTHESIS                                       |
| 17:6406333   | <i>V1NB1</i>        | REACTOME_GLYCEROPHOSPHOLIPID_BIOSYNTHESIS                                       |
| 20:5575860   | <i>CRLS1</i>        | REACTOME_GLYCEROPHOSPHOLIPID_BIOSYNTHESIS                                       |
| 20:6011934   | <i>CRLS1</i>        | REACTOME_GLYCEROPHOSPHOLIPID_BIOSYNTHESIS                                       |
| 17:41056283  | <i>RETREG3</i>      | REACTOME_GLYCOGEN_STORAGE_DISEASES                                              |
| 5:133558885  | <i>C5orf24</i>      | REACTOME_GLYCOLYSIS                                                             |
| 6:71594785   | <i>RIMS1</i>        | REACTOME_GLYCOSAMINOGLYCAN_METABOLISM                                           |
| 7:65425894   | <i>GS1-124K5.11</i> | REACTOME_GLYCOSAMINOGLYCAN_METABOLISM                                           |
| 11:134255325 | <i>IGSF9B</i>       | REACTOME_GLYCOSAMINOGLYCAN_METABOLISM                                           |
| 13:97182312  | <i>MBNL2</i>        | REACTOME_GLYCOSAMINOGLYCAN_METABOLISM                                           |
| 13:97200682  | <i>MBNL2</i>        | REACTOME_GLYCOSAMINOGLYCAN_METABOLISM                                           |
| 13:97278310  | <i>MBNL2</i>        | REACTOME_GLYCOSAMINOGLYCAN_METABOLISM                                           |
| 13:97441830  | <i>MBNL2</i>        | REACTOME_GLYCOSAMINOGLYCAN_METABOLISM                                           |
| 1:155205634  | <i>GBAP1</i>        | REACTOME_GLYCOSPHINGOLIPID_METABOLISM                                           |
| 3:160817877  | <i>SPTSSB</i>       | REACTOME_GLYCOSPHINGOLIPID_METABOLISM                                           |
| 4:114899005  | <i>CAMK2D</i>       | REACTOME_GLYCOSPHINGOLIPID_METABOLISM                                           |
| 14:88372366  | <i>GALC</i>         | REACTOME_GLYCOSPHINGOLIPID_METABOLISM                                           |
| 14:88393900  | <i>GALC</i>         | REACTOME_GLYCOSPHINGOLIPID_METABOLISM                                           |

|              |                     |                                                              |
|--------------|---------------------|--------------------------------------------------------------|
| 14:88415750  | <i>GALC</i>         | REACTOME_GLYCOSPHINGOLIPID_METABOLISM                        |
| 14:88443553  | <i>GALC</i>         | REACTOME_GLYCOSPHINGOLIPID_METABOLISM                        |
| 12:133295501 | <i>FBRSL1</i>       | REACTOME_GLYOXYLATE_METABOLISM_AND_GLYCINE_DEGRADATION       |
| 1:226351254  | <i>ITPKB</i>        | REACTOME_GOLGI_ASSOCIATED_VESICLE_BIOGENESIS                 |
| 1:226372766  | <i>ITPKB</i>        | REACTOME_GOLGI_ASSOCIATED_VESICLE_BIOGENESIS                 |
| 3:121411876  | <i>KPNA1</i>        | REACTOME_GOLGI_ASSOCIATED_VESICLE_BIOGENESIS                 |
| 3:121412702  | <i>KPNA1</i>        | REACTOME_GOLGI_ASSOCIATED_VESICLE_BIOGENESIS                 |
| 4:925376     | <i>GAK</i>          | REACTOME_GOLGI_ASSOCIATED_VESICLE_BIOGENESIS                 |
| 9:17579690   | <i>SH3GL2_2</i>     | REACTOME_GOLGI_ASSOCIATED_VESICLE_BIOGENESIS                 |
| 9:17587160   | <i>SH3GL2_2</i>     | REACTOME_GOLGI_ASSOCIATED_VESICLE_BIOGENESIS                 |
| 9:17609302   | <i>SH3GL2_2</i>     | REACTOME_GOLGI_ASSOCIATED_VESICLE_BIOGENESIS                 |
| 9:17626762   | <i>SH3GL2_2</i>     | REACTOME_GOLGI_ASSOCIATED_VESICLE_BIOGENESIS                 |
| 9:17627444   | <i>SH3GL2_2</i>     | REACTOME_GOLGI_ASSOCIATED_VESICLE_BIOGENESIS                 |
| 9:17642664   | <i>SH3GL2_2</i>     | REACTOME_GOLGI_ASSOCIATED_VESICLE_BIOGENESIS                 |
| 9:17710876   | <i>SH3GL2_2</i>     | REACTOME_GOLGI_ASSOCIATED_VESICLE_BIOGENESIS                 |
| 9:17732590   | <i>SH3GL2_2</i>     | REACTOME_GOLGI_ASSOCIATED_VESICLE_BIOGENESIS                 |
| 9:17737514   | <i>SH3GL2_2</i>     | REACTOME_GOLGI_ASSOCIATED_VESICLE_BIOGENESIS                 |
| 9:17758945   | <i>SH3GL2_2</i>     | REACTOME_GOLGI_ASSOCIATED_VESICLE_BIOGENESIS                 |
| 12:123326598 | <i>HIP1R</i>        | REACTOME_GOLGI_ASSOCIATED_VESICLE_BIOGENESIS                 |
| 4:76695927   | <i>FAM47E-STBD1</i> | REACTOME_GOLGI_CISTERNAE_PERICENTRIOLAR_STACK_REORGANIZATION |
| 2:135921205  | <i>TMEM163</i>      | REACTOME_GOLGI_TO_ER_RETROGRADE_TRANSPORT                    |
| 10:104005410 | <i>GBF1</i>         | REACTOME_GOLGI_TO_ER_RETROGRADE_TRANSPORT                    |
| 10:104034550 | <i>GBF1</i>         | REACTOME_GOLGI_TO_ER_RETROGRADE_TRANSPORT                    |
| 10:104258303 | <i>GBF1</i>         | REACTOME_GOLGI_TO_ER_RETROGRADE_TRANSPORT                    |
| 12:39759090  | <i>LRRK2_2</i>      | REACTOME_GOLGI_TO_ER_RETROGRADE_TRANSPORT                    |
| 12:39826709  | <i>LRRK2_2</i>      | REACTOME_GOLGI_TO_ER_RETROGRADE_TRANSPORT                    |
| 17:43017194  | <i>CRHR1_2</i>      | REACTOME_GOLGI_TO_ER_RETROGRADE_TRANSPORT                    |
| 17:43021962  | <i>CRHR1_2</i>      | REACTOME_GOLGI_TO_ER_RETROGRADE_TRANSPORT                    |
| 17:44800946  | <i>WNT3</i>         | REACTOME_GOLGI_TO_ER_RETROGRADE_TRANSPORT                    |
| 17:44833217  | <i>WNT3</i>         | REACTOME_GOLGI_TO_ER_RETROGRADE_TRANSPORT                    |
| 3:150935203  | <i>MED12L</i>       | REACTOME_GPCR_LIGAND_BINDING                                 |
| 3:151090424  | <i>MED12L</i>       | REACTOME_GPCR_LIGAND_BINDING                                 |
| 3:151099733  | <i>MED12L</i>       | REACTOME_GPCR_LIGAND_BINDING                                 |
| 4:76924571   | <i>FAM47E-STBD1</i> | REACTOME_GPCR_LIGAND_BINDING                                 |
| 6:29565889   | <i>TRIM40</i>       | REACTOME_GPCR_LIGAND_BINDING                                 |
| 6:29590715   | <i>TRIM40</i>       | REACTOME_GPCR_LIGAND_BINDING                                 |
| 14:88472612  | <i>GALC</i>         | REACTOME_GPCR_LIGAND_BINDING                                 |
| 17:43744203  | <i>CRHR1_2</i>      | REACTOME_GPCR_LIGAND_BINDING                                 |
| 17:43748712  | <i>CRHR1_2</i>      | REACTOME_GPCR_LIGAND_BINDING                                 |
| 17:43784228  | <i>CRHR1_2</i>      | REACTOME_GPCR_LIGAND_BINDING                                 |
| 17:43791502  | <i>CRHR1_2</i>      | REACTOME_GPCR_LIGAND_BINDING                                 |
| 17:43796210  | <i>CRHR1_2</i>      | REACTOME_GPCR_LIGAND_BINDING                                 |
| 17:43843861  | <i>CRHR1_2</i>      | REACTOME_GPCR_LIGAND_BINDING                                 |
| 17:43847503  | <i>CRHR1_2</i>      | REACTOME_GPCR_LIGAND_BINDING                                 |
| 17:43849514  | <i>CRHR1_2</i>      | REACTOME_GPCR_LIGAND_BINDING                                 |
| 17:44843651  | <i>WNT3</i>         | REACTOME_GPCR_LIGAND_BINDING                                 |
| 17:44870978  | <i>WNT3</i>         | REACTOME_GPCR_LIGAND_BINDING                                 |
| 17:44871422  | <i>WNT3</i>         | REACTOME_GPCR_LIGAND_BINDING                                 |
| 17:44888209  | <i>WNT3</i>         | REACTOME_GPCR_LIGAND_BINDING                                 |
| 17:44888715  | <i>WNT3</i>         | REACTOME_GPCR_LIGAND_BINDING                                 |
| 17:44906949  | <i>WNT3</i>         | REACTOME_GPCR_LIGAND_BINDING                                 |
| 17:44912901  | <i>WNT3</i>         | REACTOME_GPCR_LIGAND_BINDING                                 |
| 17:44931399  | <i>WNT3</i>         | REACTOME_GPCR_LIGAND_BINDING                                 |

|             |                 |                                                                    |
|-------------|-----------------|--------------------------------------------------------------------|
| 17:44947756 | <i>WNT3</i>     | REACTOME_GPCR_LIGAND_BINDING                                       |
| 19:2557113  | <i>SPPL2B</i>   | REACTOME_GPCR_LIGAND_BINDING                                       |
| 19:2563327  | <i>SPPL2B</i>   | REACTOME_GPCR_LIGAND_BINDING                                       |
| 19:2580057  | <i>SPPL2B</i>   | REACTOME_GPCR_LIGAND_BINDING                                       |
| 19:2660983  | <i>SPPL2B</i>   | REACTOME_GPCR_LIGAND_BINDING                                       |
| 20:5290081  | <i>CRLS1</i>    | REACTOME_GPCR_LIGAND_BINDING                                       |
| 19:2557113  | <i>SPPL2B</i>   | REACTOME_G_PROTEIN_ACTIVATION                                      |
| 19:2563327  | <i>SPPL2B</i>   | REACTOME_G_PROTEIN_ACTIVATION                                      |
| 19:2580057  | <i>SPPL2B</i>   | REACTOME_G_PROTEIN_ACTIVATION                                      |
| 19:2660983  | <i>SPPL2B</i>   | REACTOME_G_PROTEIN_ACTIVATION                                      |
| 3:49406095  | <i>IP6K2</i>    | REACTOME_G_PROTEIN_BETA:GAMMA_SIGNALLING                           |
| 3:49424231  | <i>IP6K2</i>    | REACTOME_G_PROTEIN_BETA:GAMMA_SIGNALLING                           |
| 3:49450137  | <i>IP6K2</i>    | REACTOME_G_PROTEIN_BETA:GAMMA_SIGNALLING                           |
| 19:2557113  | <i>SPPL2B</i>   | REACTOME_G_PROTEIN_BETA:GAMMA_SIGNALLING                           |
| 19:2563327  | <i>SPPL2B</i>   | REACTOME_G_PROTEIN_BETA:GAMMA_SIGNALLING                           |
| 19:2580057  | <i>SPPL2B</i>   | REACTOME_G_PROTEIN_BETA:GAMMA_SIGNALLING                           |
| 19:2660983  | <i>SPPL2B</i>   | REACTOME_G_PROTEIN_BETA:GAMMA_SIGNALLING                           |
| 6:29565889  | <i>TRIM40</i>   | REACTOME_G_PROTEIN_GATED_POTASSIUM_CHANNELS                        |
| 6:29590715  | <i>TRIM40</i>   | REACTOME_G_PROTEIN_GATED_POTASSIUM_CHANNELS                        |
| 19:2557113  | <i>SPPL2B</i>   | REACTOME_G_PROTEIN_GATED_POTASSIUM_CHANNELS                        |
| 19:2563327  | <i>SPPL2B</i>   | REACTOME_G_PROTEIN_GATED_POTASSIUM_CHANNELS                        |
| 19:2580057  | <i>SPPL2B</i>   | REACTOME_G_PROTEIN_GATED_POTASSIUM_CHANNELS                        |
| 19:2660983  | <i>SPPL2B</i>   | REACTOME_G_PROTEIN_GATED_POTASSIUM_CHANNELS                        |
| 21:38984964 | <i>DYRK1A</i>   | REACTOME_G_PROTEIN_GATED_POTASSIUM_CHANNELS                        |
| 21:39018136 | <i>DYRK1A</i>   | REACTOME_G_PROTEIN_GATED_POTASSIUM_CHANNELS                        |
| 21:39021814 | <i>DYRK1A</i>   | REACTOME_G_PROTEIN_GATED_POTASSIUM_CHANNELS                        |
| 21:39039956 | <i>DYRK1A</i>   | REACTOME_G_PROTEIN_GATED_POTASSIUM_CHANNELS                        |
| 21:39088785 | <i>DYRK1A</i>   | REACTOME_G_PROTEIN_GATED_POTASSIUM_CHANNELS                        |
| 21:39108160 | <i>DYRK1A</i>   | REACTOME_G_PROTEIN_GATED_POTASSIUM_CHANNELS                        |
| 21:39120480 | <i>DYRK1A</i>   | REACTOME_G_PROTEIN_GATED_POTASSIUM_CHANNELS                        |
| 21:39134980 | <i>DYRK1A</i>   | REACTOME_G_PROTEIN_GATED_POTASSIUM_CHANNELS                        |
| 21:39197323 | <i>DYRK1A</i>   | REACTOME_G_PROTEIN_GATED_POTASSIUM_CHANNELS                        |
| 21:39217472 | <i>DYRK1A</i>   | REACTOME_G_PROTEIN_GATED_POTASSIUM_CHANNELS                        |
| 3:48835245  | <i>IP6K2</i>    | REACTOME_G_PROTEIN_MEDIATED_EVENTS                                 |
| 3:123089448 | <i>KPNA1</i>    | REACTOME_G_PROTEIN_MEDIATED_EVENTS                                 |
| 4:114424939 | <i>CAMK2D</i>   | REACTOME_G_PROTEIN_MEDIATED_EVENTS                                 |
| 4:114494052 | <i>CAMK2D</i>   | REACTOME_G_PROTEIN_MEDIATED_EVENTS                                 |
| 4:114529492 | <i>CAMK2D</i>   | REACTOME_G_PROTEIN_MEDIATED_EVENTS                                 |
| 4:114539964 | <i>CAMK2D</i>   | REACTOME_G_PROTEIN_MEDIATED_EVENTS                                 |
| 4:114597918 | <i>CAMK2D</i>   | REACTOME_G_PROTEIN_MEDIATED_EVENTS                                 |
| 8:131799767 | <i>FAM49B</i>   | REACTOME_G_PROTEIN_MEDIATED_EVENTS                                 |
| 8:131845512 | <i>FAM49B</i>   | REACTOME_G_PROTEIN_MEDIATED_EVENTS                                 |
| 8:131865425 | <i>FAM49B</i>   | REACTOME_G_PROTEIN_MEDIATED_EVENTS                                 |
| 8:131901170 | <i>FAM49B</i>   | REACTOME_G_PROTEIN_MEDIATED_EVENTS                                 |
| 16:50300511 | <i>CASC16</i>   | REACTOME_G_PROTEIN_MEDIATED_EVENTS                                 |
| 16:50317039 | <i>CASC16</i>   | REACTOME_G_PROTEIN_MEDIATED_EVENTS                                 |
| 3:49406095  | <i>IP6K2</i>    | REACTOME_GPVI_MEDIATED_ACTIVATION_CASCADE                          |
| 3:49424231  | <i>IP6K2</i>    | REACTOME_GPVI_MEDIATED_ACTIVATION_CASCADE                          |
| 3:49450137  | <i>IP6K2</i>    | REACTOME_GPVI_MEDIATED_ACTIVATION_CASCADE                          |
| 6:112137847 | <i>FYN</i>      | REACTOME_GPVI_MEDIATED_ACTIVATION_CASCADE                          |
| 6:112151452 | <i>FYN</i>      | REACTOME_GPVI_MEDIATED_ACTIVATION_CASCADE                          |
| 6:112175069 | <i>FYN</i>      | REACTOME_GPVI_MEDIATED_ACTIVATION_CASCADE                          |
| 17:42454243 | <i>FAM171A2</i> | REACTOME_GRB2:SOS_PROVIDES_LINKAGE_TO_MAPK_SIGNALING_FOR_INTEGRINS |

|              |                 |                                                   |
|--------------|-----------------|---------------------------------------------------|
| 17:40392358  | <i>RETREG3</i>  | REACTOME_GROWTH_HORMONE_RECEPTOR_SIGNALING        |
| 3:183427301  | <i>MCCC1</i>    | REACTOME_HATS_ACETYLATE_HISTONES                  |
| 5:133910742  | <i>C5orf24</i>  | REACTOME_HATS_ACETYLATE_HISTONES                  |
| 17:7155861   | <i>V1NB1</i>    | REACTOME_HATS_ACETYLATE_HISTONES                  |
| 17:44160410  | <i>WNT3</i>     | REACTOME_HATS_ACETYLATE_HISTONES                  |
| 17:44189067  | <i>WNT3</i>     | REACTOME_HATS_ACETYLATE_HISTONES                  |
| 2:17941653   | <i>KCNS3</i>    | REACTOME_HDR_THROUGH_HOMOLOGOUS_RECOMBINATION_HRR |
| 2:17963171   | <i>KCNS3</i>    | REACTOME_HDR_THROUGH_HOMOLOGOUS_RECOMBINATION_HRR |
| 12:133206648 | <i>FBRSL1</i>   | REACTOME_HDR_THROUGH_HOMOLOGOUS_RECOMBINATION_HRR |
| 12:133223685 | <i>FBRSL1</i>   | REACTOME_HDR_THROUGH_HOMOLOGOUS_RECOMBINATION_HRR |
| 17:59791813  | <i>BRIP1</i>    | REACTOME_HDR_THROUGH_HOMOLOGOUS_RECOMBINATION_HRR |
| 17:59922925  | <i>BRIP1</i>    | REACTOME_HDR_THROUGH_HOMOLOGOUS_RECOMBINATION_HRR |
| 1:226568665  | <i>ITPKB</i>    | REACTOME_HDR_THROUGH_MMEJ_ALT_NHEJ                |
| 17:59791813  | <i>BRIP1</i>    | REACTOME_HDR_THROUGH_SINGLE_STRAND_ANNEALING_SSA  |
| 17:59922925  | <i>BRIP1</i>    | REACTOME_HDR_THROUGH_SINGLE_STRAND_ANNEALING_SSA  |
| 3:48835245   | <i>IP6K2</i>    | REACTOME_HEDGEHOG_OFF_STATE                       |
| 3:123089448  | <i>KPNA1</i>    | REACTOME_HEDGEHOG_OFF_STATE                       |
| 8:131799767  | <i>FAM49B</i>   | REACTOME_HEDGEHOG_OFF_STATE                       |
| 8:131845512  | <i>FAM49B</i>   | REACTOME_HEDGEHOG_OFF_STATE                       |
| 8:131865425  | <i>FAM49B</i>   | REACTOME_HEDGEHOG_OFF_STATE                       |
| 8:131901170  | <i>FAM49B</i>   | REACTOME_HEDGEHOG_OFF_STATE                       |
| 10:103185542 | <i>GBF1</i>     | REACTOME_HEDGEHOG_OFF_STATE                       |
| 10:103305087 | <i>GBF1</i>     | REACTOME_HEDGEHOG_OFF_STATE                       |
| 10:103308244 | <i>GBF1</i>     | REACTOME_HEDGEHOG_OFF_STATE                       |
| 10:104278055 | <i>GBF1</i>     | REACTOME_HEDGEHOG_OFF_STATE                       |
| 10:104305501 | <i>GBF1</i>     | REACTOME_HEDGEHOG_OFF_STATE                       |
| 16:50300511  | <i>CASC16</i>   | REACTOME_HEDGEHOG_OFF_STATE                       |
| 16:50317039  | <i>CASC16</i>   | REACTOME_HEDGEHOG_OFF_STATE                       |
| 10:104278055 | <i>GBF1</i>     | REACTOME_HEDGEHOG_ON_STATE                        |
| 10:104305501 | <i>GBF1</i>     | REACTOME_HEDGEHOG_ON_STATE                        |
| 3:48835245   | <i>IP6K2</i>    | REACTOME_HEMOSTASIS                               |
| 3:49406095   | <i>IP6K2</i>    | REACTOME_HEMOSTASIS                               |
| 3:49424231   | <i>IP6K2</i>    | REACTOME_HEMOSTASIS                               |
| 3:49450137   | <i>IP6K2</i>    | REACTOME_HEMOSTASIS                               |
| 3:151090424  | <i>MED12L</i>   | REACTOME_HEMOSTASIS                               |
| 3:151099733  | <i>MED12L</i>   | REACTOME_HEMOSTASIS                               |
| 4:90804532   | <i>SNCA_2</i>   | REACTOME_HEMOSTASIS                               |
| 4:90868355   | <i>SNCA_2</i>   | REACTOME_HEMOSTASIS                               |
| 5:133558885  | <i>C5orf24</i>  | REACTOME_HEMOSTASIS                               |
| 6:31682029   | <i>HLA-DRB5</i> | REACTOME_HEMOSTASIS                               |
| 6:112137847  | <i>FYN</i>      | REACTOME_HEMOSTASIS                               |
| 6:112151452  | <i>FYN</i>      | REACTOME_HEMOSTASIS                               |
| 6:112175069  | <i>FYN</i>      | REACTOME_HEMOSTASIS                               |
| 8:11558567   | <i>CTSB</i>     | REACTOME_HEMOSTASIS                               |
| 8:11599269   | <i>CTSB</i>     | REACTOME_HEMOSTASIS                               |
| 8:23050400   | <i>BIN3</i>     | REACTOME_HEMOSTASIS                               |
| 8:130914130  | <i>FAM49B</i>   | REACTOME_HEMOSTASIS                               |
| 8:131002284  | <i>FAM49B</i>   | REACTOME_HEMOSTASIS                               |
| 11:10647977  | <i>RNF141</i>   | REACTOME_HEMOSTASIS                               |
| 11:10648481  | <i>RNF141</i>   | REACTOME_HEMOSTASIS                               |
| 11:10660840  | <i>RNF141</i>   | REACTOME_HEMOSTASIS                               |
| 11:82582134  | <i>DLG2</i>     | REACTOME_HEMOSTASIS                               |
| 11:82635123  | <i>DLG2</i>     | REACTOME_HEMOSTASIS                               |

|              |                     |                                                     |
|--------------|---------------------|-----------------------------------------------------|
| 11:82648357  | <i>DLG2</i>         | REACTOME_HEMOSTASIS                                 |
| 11:133947732 | <i>IGSF9B</i>       | REACTOME_HEMOSTASIS                                 |
| 12:39759090  | <i>LRRK2_2</i>      | REACTOME_HEMOSTASIS                                 |
| 12:39826709  | <i>LRRK2_2</i>      | REACTOME_HEMOSTASIS                                 |
| 16:30510571  | <i>SETD1A</i>       | REACTOME_HEMOSTASIS                                 |
| 16:30516492  | <i>SETD1A</i>       | REACTOME_HEMOSTASIS                                 |
| 16:30520856  | <i>SETD1A</i>       | REACTOME_HEMOSTASIS                                 |
| 16:31370452  | <i>SETD1A</i>       | REACTOME_HEMOSTASIS                                 |
| 17:7560294   | <i>V1NB1</i>        | REACTOME_HEMOSTASIS                                 |
| 17:7578671   | <i>V1NB1</i>        | REACTOME_HEMOSTASIS                                 |
| 17:42454243  | <i>FAM171A2</i>     | REACTOME_HEMOSTASIS                                 |
| 17:43017194  | <i>CRHR1_2</i>      | REACTOME_HEMOSTASIS                                 |
| 17:43021962  | <i>CRHR1_2</i>      | REACTOME_HEMOSTASIS                                 |
| 17:76969183  | <i>DNAH17</i>       | REACTOME_HEMOSTASIS                                 |
| 19:2557113   | <i>SPPL2B</i>       | REACTOME_HEMOSTASIS                                 |
| 19:2563327   | <i>SPPL2B</i>       | REACTOME_HEMOSTASIS                                 |
| 19:2580057   | <i>SPPL2B</i>       | REACTOME_HEMOSTASIS                                 |
| 19:2660983   | <i>SPPL2B</i>       | REACTOME_HEMOSTASIS                                 |
| 19:3142784   | <i>SPPL2B</i>       | REACTOME_HEMOSTASIS                                 |
| 19:3147326   | <i>SPPL2B</i>       | REACTOME_HEMOSTASIS                                 |
| 6:71594785   | <i>RIMS1</i>        | REACTOME_HEPARAN_SULFATE_HEPARIN_HS_GAG_METABOLISM  |
| 7:65425894   | <i>GS1-124K5.11</i> | REACTOME_HEPARAN_SULFATE_HEPARIN_HS_GAG_METABOLISM  |
| 11:134255325 | <i>IGSF9B</i>       | REACTOME_HEPARAN_SULFATE_HEPARIN_HS_GAG_METABOLISM  |
| 13:97182312  | <i>MBNL2</i>        | REACTOME_HEPARAN_SULFATE_HEPARIN_HS_GAG_METABOLISM  |
| 13:97200682  | <i>MBNL2</i>        | REACTOME_HEPARAN_SULFATE_HEPARIN_HS_GAG_METABOLISM  |
| 13:97278310  | <i>MBNL2</i>        | REACTOME_HEPARAN_SULFATE_HEPARIN_HS_GAG_METABOLISM  |
| 13:97441830  | <i>MBNL2</i>        | REACTOME_HEPARAN_SULFATE_HEPARIN_HS_GAG_METABOLISM  |
| 2:135708115  | <i>TMEM163</i>      | REACTOME_HIV_ELONGATION_ARREST_AND_RECOVERY         |
| 6:31925679   | <i>HLA-DRB5</i>     | REACTOME_HIV_ELONGATION_ARREST_AND_RECOVERY         |
| 2:135708115  | <i>TMEM163</i>      | REACTOME_HIV_INFECTION                              |
| 3:122200170  | <i>KPNA1</i>        | REACTOME_HIV_INFECTION                              |
| 6:31925679   | <i>HLA-DRB5</i>     | REACTOME_HIV_INFECTION                              |
| 6:112137847  | <i>FYN</i>          | REACTOME_HIV_INFECTION                              |
| 6:112151452  | <i>FYN</i>          | REACTOME_HIV_INFECTION                              |
| 6:112175069  | <i>FYN</i>          | REACTOME_HIV_INFECTION                              |
| 8:17125768   | <i>FGF20</i>        | REACTOME_HIV_INFECTION                              |
| 10:15199347  | <i>ITGA8</i>        | REACTOME_HIV_INFECTION                              |
| 10:103185542 | <i>GBF1</i>         | REACTOME_HIV_INFECTION                              |
| 10:103305087 | <i>GBF1</i>         | REACTOME_HIV_INFECTION                              |
| 10:103308244 | <i>GBF1</i>         | REACTOME_HIV_INFECTION                              |
| 17:43181287  | <i>CRHR1_2</i>      | REACTOME_HIV_INFECTION                              |
| 17:43184627  | <i>CRHR1_2</i>      | REACTOME_HIV_INFECTION                              |
| 2:135708115  | <i>TMEM163</i>      | REACTOME_HIV_LIFE_CYCLE                             |
| 3:122200170  | <i>KPNA1</i>        | REACTOME_HIV_LIFE_CYCLE                             |
| 6:31925679   | <i>HLA-DRB5</i>     | REACTOME_HIV_LIFE_CYCLE                             |
| 8:17125768   | <i>FGF20</i>        | REACTOME_HIV_LIFE_CYCLE                             |
| 10:15199347  | <i>ITGA8</i>        | REACTOME_HIV_LIFE_CYCLE                             |
| 17:43181287  | <i>CRHR1_2</i>      | REACTOME_HIV_LIFE_CYCLE                             |
| 17:43184627  | <i>CRHR1_2</i>      | REACTOME_HIV_LIFE_CYCLE                             |
| 17:59791813  | <i>BRIP1</i>        | REACTOME_HOMOLOGOUS_DNA_PAIRING_AND_STRAND_EXCHANGE |
| 17:59922925  | <i>BRIP1</i>        | REACTOME_HOMOLOGOUS_DNA_PAIRING_AND_STRAND_EXCHANGE |
| 1:226568665  | <i>ITPKB</i>        | REACTOME_HOMOLOGY_DIRECTED_REPAIR                   |
| 2:17941653   | <i>KCNS3</i>        | REACTOME_HOMOLOGY_DIRECTED_REPAIR                   |

|              |              |                                                                                   |
|--------------|--------------|-----------------------------------------------------------------------------------|
| 2:17963171   | KCNS3        | REACTOME_HOMOLOGY_DIRECTED_REPAIR                                                 |
| 12:133206648 | FBRSL1       | REACTOME_HOMOLOGY_DIRECTED_REPAIR                                                 |
| 12:133223685 | FBRSL1       | REACTOME_HOMOLOGY_DIRECTED_REPAIR                                                 |
| 17:59791813  | BRIP1        | REACTOME_HOMOLOGY_DIRECTED_REPAIR                                                 |
| 17:59922925  | BRIP1        | REACTOME_HOMOLOGY_DIRECTED_REPAIR                                                 |
| 3:122200170  | KPNA1        | REACTOME_HOST_INTERACTIONS_OF_HIV_FACTORS                                         |
| 6:112137847  | FYN          | REACTOME_HOST_INTERACTIONS_OF_HIV_FACTORS                                         |
| 6:112151452  | FYN          | REACTOME_HOST_INTERACTIONS_OF_HIV_FACTORS                                         |
| 6:112175069  | FYN          | REACTOME_HOST_INTERACTIONS_OF_HIV_FACTORS                                         |
| 10:103185542 | GBF1         | REACTOME_HOST_INTERACTIONS_OF_HIV_FACTORS                                         |
| 10:103305087 | GBF1         | REACTOME_HOST_INTERACTIONS_OF_HIV_FACTORS                                         |
| 10:103308244 | GBF1         | REACTOME_HOST_INTERACTIONS_OF_HIV_FACTORS                                         |
| 3:122200170  | KPNA1        | REACTOME_HOST_INTERACTIONS_WITH_INFLUENZA_FACTORS                                 |
| 4:114424939  | CAMK2D       | REACTOME_HSF1_DEPENDENT_TRANSACTIVATION                                           |
| 4:114494052  | CAMK2D       | REACTOME_HSF1_DEPENDENT_TRANSACTIVATION                                           |
| 4:114529492  | CAMK2D       | REACTOME_HSF1_DEPENDENT_TRANSACTIVATION                                           |
| 4:114539964  | CAMK2D       | REACTOME_HSF1_DEPENDENT_TRANSACTIVATION                                           |
| 4:114597918  | CAMK2D       | REACTOME_HSF1_DEPENDENT_TRANSACTIVATION                                           |
| 13:97182312  | MBNL2        | REACTOME_HS_GAG_BIOSYNTHESIS                                                      |
| 13:97200682  | MBNL2        | REACTOME_HS_GAG_BIOSYNTHESIS                                                      |
| 13:97278310  | MBNL2        | REACTOME_HS_GAG_BIOSYNTHESIS                                                      |
| 13:97441830  | MBNL2        | REACTOME_HS_GAG_BIOSYNTHESIS                                                      |
| 7:65425894   | GS1-124K5.11 | REACTOME_HS_GAG_DEGRADATION                                                       |
| 10:104258303 | GBF1         | REACTOME_HSP90_CHAPERONE_CYCLE_FOR_STEROID_HORMONE_RECEPTORS_SHR                  |
| 7:65425894   | GS1-124K5.11 | REACTOME_HYALURONAN_METABOLISM                                                    |
| 7:65425894   | GS1-124K5.11 | REACTOME_HYALURONAN_UPTAKE_AND_DEGRADATION                                        |
| 20:5575860   | CRLS1        | REACTOME_HYDROLYSIS_OF_LPC                                                        |
| 6:29798642   | TRIM40       | REACTOME_IMMUNOREGULATORY_INTERACTIONS_BETWEEN_A_LYMPHOID_AND_A_NON_LYMPHOID_CELL |
| 16:30510571  | SETD1A       | REACTOME_IMMUNOREGULATORY_INTERACTIONS_BETWEEN_A_LYMPHOID_AND_A_NON_LYMPHOID_CELL |
| 16:30516492  | SETD1A       | REACTOME_IMMUNOREGULATORY_INTERACTIONS_BETWEEN_A_LYMPHOID_AND_A_NON_LYMPHOID_CELL |
| 16:30520856  | SETD1A       | REACTOME_IMMUNOREGULATORY_INTERACTIONS_BETWEEN_A_LYMPHOID_AND_A_NON_LYMPHOID_CELL |
| 8:11558567   | CTSB         | REACTOME_INCRETIN_SYNTHESIS_SECRETION_AND_INACTIVATION                            |
| 8:11599269   | CTSB         | REACTOME_INCRETIN_SYNTHESIS_SECRETION_AND_INACTIVATION                            |
| 2:135708115  | TMEM163      | REACTOME_INFECTIOUS_DISEASE                                                       |
| 3:122200170  | KPNA1        | REACTOME_INFECTIOUS_DISEASE                                                       |
| 6:31925679   | HLA-DRB5     | REACTOME_INFECTIOUS_DISEASE                                                       |
| 6:112137847  | FYN          | REACTOME_INFECTIOUS_DISEASE                                                       |
| 6:112151452  | FYN          | REACTOME_INFECTIOUS_DISEASE                                                       |
| 6:112175069  | FYN          | REACTOME_INFECTIOUS_DISEASE                                                       |
| 8:17125768   | FGF20        | REACTOME_INFECTIOUS_DISEASE                                                       |
| 9:17579690   | SH3GL2_2     | REACTOME_INFECTIOUS_DISEASE                                                       |
| 9:17587160   | SH3GL2_2     | REACTOME_INFECTIOUS_DISEASE                                                       |
| 9:17609302   | SH3GL2_2     | REACTOME_INFECTIOUS_DISEASE                                                       |
| 9:17626762   | SH3GL2_2     | REACTOME_INFECTIOUS_DISEASE                                                       |
| 9:17627444   | SH3GL2_2     | REACTOME_INFECTIOUS_DISEASE                                                       |
| 9:17642664   | SH3GL2_2     | REACTOME_INFECTIOUS_DISEASE                                                       |
| 9:17710876   | SH3GL2_2     | REACTOME_INFECTIOUS_DISEASE                                                       |
| 9:17732590   | SH3GL2_2     | REACTOME_INFECTIOUS_DISEASE                                                       |
| 9:17737514   | SH3GL2_2     | REACTOME_INFECTIOUS_DISEASE                                                       |
| 9:17758945   | SH3GL2_2     | REACTOME_INFECTIOUS_DISEASE                                                       |
| 10:15199347  | ITGA8        | REACTOME_INFECTIOUS_DISEASE                                                       |
| 10:103185542 | GBF1         | REACTOME_INFECTIOUS_DISEASE                                                       |
| 10:103305087 | GBF1         | REACTOME_INFECTIOUS_DISEASE                                                       |

|              |                     |                                                                                                     |
|--------------|---------------------|-----------------------------------------------------------------------------------------------------|
| 10:103308244 | <i>GBF1</i>         | REACTOME_INFECTIONOUS_DISEASE                                                                       |
| 16:31004169  | <i>SETD1A</i>       | REACTOME_INFECTIONOUS_DISEASE                                                                       |
| 17:43181287  | <i>CRHR1_2</i>      | REACTOME_INFECTIONOUS_DISEASE                                                                       |
| 17:43184627  | <i>CRHR1_2</i>      | REACTOME_INFECTIONOUS_DISEASE                                                                       |
| 3:122200170  | <i>KPNA1</i>        | REACTOME_INFLUENZA_INFECTION                                                                        |
| 5:133558885  | <i>C5orf24</i>      | REACTOME_INHIBITION_OF_REPLICATION_INITIATION_OF_DAMAGED_DNA_BY_RB1_E2F1                            |
| 17:45215865  | <i>WNT3</i>         | ION_OF_THE_PROTEOLYTIC_ACTIVITY_OF_APC_C_REQUIRED_FOR_THE_ONSET_OF_ANAPHASE_BY_MITOTIC_SPINDLE_CHEC |
| 17:45244822  | <i>WNT3</i>         | ION_OF_THE_PROTEOLYTIC_ACTIVITY_OF_APC_C_REQUIRED_FOR_THE_ONSET_OF_ANAPHASE_BY_MITOTIC_SPINDLE_CHEC |
| 6:31897219   | <i>HLA-DRB5</i>     | REACTOME_INITIAL_TRIGGERING_OF_COMPLEMENT                                                           |
| 9:17579690   | <i>SH3GL2_2</i>     | REACTOME_INLB_MEDIATED_ENTRY_OF_LISTERIA_MONOCYTOGENES INTO_HOST_CELL                               |
| 9:17587160   | <i>SH3GL2_2</i>     | REACTOME_INLB_MEDIATED_ENTRY_OF_LISTERIA_MONOCYTOGENES INTO_HOST_CELL                               |
| 9:17609302   | <i>SH3GL2_2</i>     | REACTOME_INLB_MEDIATED_ENTRY_OF_LISTERIA_MONOCYTOGENES INTO_HOST_CELL                               |
| 9:17626762   | <i>SH3GL2_2</i>     | REACTOME_INLB_MEDIATED_ENTRY_OF_LISTERIA_MONOCYTOGENES INTO_HOST_CELL                               |
| 9:17627444   | <i>SH3GL2_2</i>     | REACTOME_INLB_MEDIATED_ENTRY_OF_LISTERIA_MONOCYTOGENES INTO_HOST_CELL                               |
| 9:17642664   | <i>SH3GL2_2</i>     | REACTOME_INLB_MEDIATED_ENTRY_OF_LISTERIA_MONOCYTOGENES INTO_HOST_CELL                               |
| 9:17710876   | <i>SH3GL2_2</i>     | REACTOME_INLB_MEDIATED_ENTRY_OF_LISTERIA_MONOCYTOGENES INTO_HOST_CELL                               |
| 9:17732590   | <i>SH3GL2_2</i>     | REACTOME_INLB_MEDIATED_ENTRY_OF_LISTERIA_MONOCYTOGENES INTO_HOST_CELL                               |
| 9:17737514   | <i>SH3GL2_2</i>     | REACTOME_INLB_MEDIATED_ENTRY_OF_LISTERIA_MONOCYTOGENES INTO_HOST_CELL                               |
| 9:17758945   | <i>SH3GL2_2</i>     | REACTOME_INLB_MEDIATED_ENTRY_OF_LISTERIA_MONOCYTOGENES INTO_HOST_CELL                               |
| 1:171837985  | <i>VAMP4</i>        | REACTOME_INNATE_IMMUNE_SYSTEM                                                                       |
| 1:171945488  | <i>VAMP4</i>        | REACTOME_INNATE_IMMUNE_SYSTEM                                                                       |
| 1:172137119  | <i>VAMP4</i>        | REACTOME_INNATE_IMMUNE_SYSTEM                                                                       |
| 1:172386261  | <i>VAMP4</i>        | REACTOME_INNATE_IMMUNE_SYSTEM                                                                       |
| 1:204876966  | <i>RAB29</i>        | REACTOME_INNATE_IMMUNE_SYSTEM                                                                       |
| 1:204940972  | <i>RAB29</i>        | REACTOME_INNATE_IMMUNE_SYSTEM                                                                       |
| 1:226044391  | <i>ITPKB</i>        | REACTOME_INNATE_IMMUNE_SYSTEM                                                                       |
| 1:226052830  | <i>ITPKB</i>        | REACTOME_INNATE_IMMUNE_SYSTEM                                                                       |
| 3:49406095   | <i>IP6K2</i>        | REACTOME_INNATE_IMMUNE_SYSTEM                                                                       |
| 3:49424231   | <i>IP6K2</i>        | REACTOME_INNATE_IMMUNE_SYSTEM                                                                       |
| 3:49450137   | <i>IP6K2</i>        | REACTOME_INNATE_IMMUNE_SYSTEM                                                                       |
| 4:15709252   | <i>BST1</i>         | REACTOME_INNATE_IMMUNE_SYSTEM                                                                       |
| 4:15713608   | <i>BST1</i>         | REACTOME_INNATE_IMMUNE_SYSTEM                                                                       |
| 4:15724372   | <i>BST1</i>         | REACTOME_INNATE_IMMUNE_SYSTEM                                                                       |
| 4:15737882   | <i>BST1</i>         | REACTOME_INNATE_IMMUNE_SYSTEM                                                                       |
| 5:101579003  | <i>PAM</i>          | REACTOME_INNATE_IMMUNE_SYSTEM                                                                       |
| 5:133558885  | <i>C5orf24</i>      | REACTOME_INNATE_IMMUNE_SYSTEM                                                                       |
| 6:31895092   | <i>HLA-DRB5</i>     | REACTOME_INNATE_IMMUNE_SYSTEM                                                                       |
| 6:31897219   | <i>HLA-DRB5</i>     | REACTOME_INNATE_IMMUNE_SYSTEM                                                                       |
| 6:32151443   | <i>HLA-DRB5</i>     | REACTOME_INNATE_IMMUNE_SYSTEM                                                                       |
| 6:112137847  | <i>FYN</i>          | REACTOME_INNATE_IMMUNE_SYSTEM                                                                       |
| 6:112151452  | <i>FYN</i>          | REACTOME_INNATE_IMMUNE_SYSTEM                                                                       |
| 6:112175069  | <i>FYN</i>          | REACTOME_INNATE_IMMUNE_SYSTEM                                                                       |
| 6:133025715  | <i>RPS12</i>        | REACTOME_INNATE_IMMUNE_SYSTEM                                                                       |
| 6:133028870  | <i>RPS12</i>        | REACTOME_INNATE_IMMUNE_SYSTEM                                                                       |
| 7:65425894   | <i>GS1-124K5.11</i> | REACTOME_INNATE_IMMUNE_SYSTEM                                                                       |
| 8:11712443   | <i>CTSB</i>         | REACTOME_INNATE_IMMUNE_SYSTEM                                                                       |
| 8:22108784   | <i>BIN3</i>         | REACTOME_INNATE_IMMUNE_SYSTEM                                                                       |
| 9:33791164   | <i>UBAP2</i>        | REACTOME_INNATE_IMMUNE_SYSTEM                                                                       |
| 10:103185542 | <i>GBF1</i>         | REACTOME_INNATE_IMMUNE_SYSTEM                                                                       |
| 10:103305087 | <i>GBF1</i>         | REACTOME_INNATE_IMMUNE_SYSTEM                                                                       |
| 10:103308244 | <i>GBF1</i>         | REACTOME_INNATE_IMMUNE_SYSTEM                                                                       |
| 11:10392432  | <i>RNF141</i>       | REACTOME_INNATE_IMMUNE_SYSTEM                                                                       |
| 11:10429998  | <i>RNF141</i>       | REACTOME_INNATE_IMMUNE_SYSTEM                                                                       |

|              |                 |                                                                                      |
|--------------|-----------------|--------------------------------------------------------------------------------------|
| 11:10458098  | <i>RNF141</i>   | REACTOME_INNATE_IMMUNE_SYSTEM                                                        |
| 11:10471738  | <i>RNF141</i>   | REACTOME_INNATE_IMMUNE_SYSTEM                                                        |
| 11:10487997  | <i>RNF141</i>   | REACTOME_INNATE_IMMUNE_SYSTEM                                                        |
| 11:10494132  | <i>RNF141</i>   | REACTOME_INNATE_IMMUNE_SYSTEM                                                        |
| 11:82582134  | <i>DLG2</i>     | REACTOME_INNATE_IMMUNE_SYSTEM                                                        |
| 11:82635123  | <i>DLG2</i>     | REACTOME_INNATE_IMMUNE_SYSTEM                                                        |
| 11:82648357  | <i>DLG2</i>     | REACTOME_INNATE_IMMUNE_SYSTEM                                                        |
| 12:45755099  | <i>SCAF11</i>   | REACTOME_INNATE_IMMUNE_SYSTEM                                                        |
| 12:124219791 | <i>HIP1R</i>    | REACTOME_INNATE_IMMUNE_SYSTEM                                                        |
| 16:30510571  | <i>SETD1A</i>   | REACTOME_INNATE_IMMUNE_SYSTEM                                                        |
| 16:30516492  | <i>SETD1A</i>   | REACTOME_INNATE_IMMUNE_SYSTEM                                                        |
| 16:30520856  | <i>SETD1A</i>   | REACTOME_INNATE_IMMUNE_SYSTEM                                                        |
| 16:31370452  | <i>SETD1A</i>   | REACTOME_INNATE_IMMUNE_SYSTEM                                                        |
| 16:50730088  | <i>CASC16</i>   | REACTOME_INNATE_IMMUNE_SYSTEM                                                        |
| 16:50730446  | <i>CASC16</i>   | REACTOME_INNATE_IMMUNE_SYSTEM                                                        |
| 16:50745926  | <i>CASC16</i>   | REACTOME_INNATE_IMMUNE_SYSTEM                                                        |
| 16:50790891  | <i>CASC16</i>   | REACTOME_INNATE_IMMUNE_SYSTEM                                                        |
| 17:39883520  | <i>RETREG3</i>  | REACTOME_INNATE_IMMUNE_SYSTEM                                                        |
| 17:41845031  | <i>FAM171A2</i> | REACTOME_INNATE_IMMUNE_SYSTEM                                                        |
| 17:42423844  | <i>FAM171A2</i> | REACTOME_INNATE_IMMUNE_SYSTEM                                                        |
| 17:42426940  | <i>FAM171A2</i> | REACTOME_INNATE_IMMUNE_SYSTEM                                                        |
| 17:43390763  | <i>CRHR1_2</i>  | REACTOME_INNATE_IMMUNE_SYSTEM                                                        |
| 17:76869878  | <i>DNAH17</i>   | REACTOME_INNATE_IMMUNE_SYSTEM                                                        |
| 1:226907849  | <i>ITPKB</i>    | REACTOME_INOSITOL_PHOSPHATE_METABOLISM                                               |
| 1:226910340  | <i>ITPKB</i>    | REACTOME_INOSITOL_PHOSPHATE_METABOLISM                                               |
| 1:226916078  | <i>ITPKB</i>    | REACTOME_INOSITOL_PHOSPHATE_METABOLISM                                               |
| 3:48748989   | <i>IP6K2</i>    | REACTOME_INOSITOL_PHOSPHATE_METABOLISM                                               |
| 3:48766111   | <i>IP6K2</i>    | REACTOME_INOSITOL_PHOSPHATE_METABOLISM                                               |
| 8:17161374   | <i>FGF20</i>    | REACTOME_INOSITOL_PHOSPHATE_METABOLISM                                               |
| 8:17176046   | <i>FGF20</i>    | REACTOME_INOSITOL_PHOSPHATE_METABOLISM                                               |
| 8:17243260   | <i>FGF20</i>    | REACTOME_INOSITOL_PHOSPHATE_METABOLISM                                               |
| 8:17260937   | <i>FGF20</i>    | REACTOME_INOSITOL_PHOSPHATE_METABOLISM                                               |
| 17:43195981  | <i>CRHR1_2</i>  | REACTOME_INOSITOL_PHOSPHATE_METABOLISM                                               |
| 3:150298317  | <i>MED12L</i>   | REACTOME_INSERTION_OF_TAIL_ANCHORED_PROTEINS_INTO_THE_ENDOPLASMIC_RETICULUM_MEMBRANE |
| 3:150303590  | <i>MED12L</i>   | REACTOME_INSERTION_OF_TAIL_ANCHORED_PROTEINS_INTO_THE_ENDOPLASMIC_RETICULUM_MEMBRANE |
| 6:31607942   | <i>HLA-DRB5</i> | REACTOME_INSERTION_OF_TAIL_ANCHORED_PROTEINS_INTO_THE_ENDOPLASMIC_RETICULUM_MEMBRANE |
| 19:2771641   | <i>SPPL2B</i>   | REACTOME_INSERTION_OF_TAIL_ANCHORED_PROTEINS_INTO_THE_ENDOPLASMIC_RETICULUM_MEMBRANE |
| 12:124219791 | <i>HIP1R</i>    | REACTOME_INSULIN_RECEPTOR_RECYCLING                                                  |
| 2:18091890   | <i>KCNS3</i>    | REACTOME_INTEGRATION_OF_ENERGY_METABOLISM                                            |
| 2:18130187   | <i>KCNS3</i>    | REACTOME_INTEGRATION_OF_ENERGY_METABOLISM                                            |
| 2:18141542   | <i>KCNS3</i>    | REACTOME_INTEGRATION_OF_ENERGY_METABOLISM                                            |
| 2:18143082   | <i>KCNS3</i>    | REACTOME_INTEGRATION_OF_ENERGY_METABOLISM                                            |
| 2:18176120   | <i>KCNS3</i>    | REACTOME_INTEGRATION_OF_ENERGY_METABOLISM                                            |
| 2:18247777   | <i>KCNS3</i>    | REACTOME_INTEGRATION_OF_ENERGY_METABOLISM                                            |
| 2:18299564   | <i>KCNS3</i>    | REACTOME_INTEGRATION_OF_ENERGY_METABOLISM                                            |
| 2:18315537   | <i>KCNS3</i>    | REACTOME_INTEGRATION_OF_ENERGY_METABOLISM                                            |
| 2:18335515   | <i>KCNS3</i>    | REACTOME_INTEGRATION_OF_ENERGY_METABOLISM                                            |
| 2:18455049   | <i>KCNS3</i>    | REACTOME_INTEGRATION_OF_ENERGY_METABOLISM                                            |
| 2:18472861   | <i>KCNS3</i>    | REACTOME_INTEGRATION_OF_ENERGY_METABOLISM                                            |
| 3:48835245   | <i>IP6K2</i>    | REACTOME_INTEGRATION_OF_ENERGY_METABOLISM                                            |
| 3:123089448  | <i>KPNA1</i>    | REACTOME_INTEGRATION_OF_ENERGY_METABOLISM                                            |
| 5:133558885  | <i>C5orf24</i>  | REACTOME_INTEGRATION_OF_ENERGY_METABOLISM                                            |
| 8:131799767  | <i>FAM49B</i>   | REACTOME_INTEGRATION_OF_ENERGY_METABOLISM                                            |

|              |          |                                                             |
|--------------|----------|-------------------------------------------------------------|
| 8:131845512  | FAM49B   | REACTOME_INTEGRATION_OF_ENERGY_METABOLISM                   |
| 8:131865425  | FAM49B   | REACTOME_INTEGRATION_OF_ENERGY_METABOLISM                   |
| 8:131901170  | FAM49B   | REACTOME_INTEGRATION_OF_ENERGY_METABOLISM                   |
| 16:50300511  | CASC16   | REACTOME_INTEGRATION_OF_ENERGY_METABOLISM                   |
| 16:50317039  | CASC16   | REACTOME_INTEGRATION_OF_ENERGY_METABOLISM                   |
| 19:2557113   | SPPL2B   | REACTOME_INTEGRATION_OF_ENERGY_METABOLISM                   |
| 19:2563327   | SPPL2B   | REACTOME_INTEGRATION_OF_ENERGY_METABOLISM                   |
| 19:2580057   | SPPL2B   | REACTOME_INTEGRATION_OF_ENERGY_METABOLISM                   |
| 19:2660983   | SPPL2B   | REACTOME_INTEGRATION_OF_ENERGY_METABOLISM                   |
| 19:3142784   | SPPL2B   | REACTOME_INTEGRATION_OF_ENERGY_METABOLISM                   |
| 19:3147326   | SPPL2B   | REACTOME_INTEGRATION_OF_ENERGY_METABOLISM                   |
| 3:122200170  | KPNA1    | REACTOME_INTEGRATION_OF_PROVIRUS                            |
| 10:15562608  | ITGA8    | REACTOME_INTEGRIN_CELL_SURFACE_INTERACTIONS                 |
| 10:15569598  | ITGA8    | REACTOME_INTEGRIN_CELL_SURFACE_INTERACTIONS                 |
| 10:15652368  | ITGA8    | REACTOME_INTEGRIN_CELL_SURFACE_INTERACTIONS                 |
| 11:133947732 | IGSF9B   | REACTOME_INTEGRIN_CELL_SURFACE_INTERACTIONS                 |
| 16:30510571  | SETD1A   | REACTOME_INTEGRIN_CELL_SURFACE_INTERACTIONS                 |
| 16:30516492  | SETD1A   | REACTOME_INTEGRIN_CELL_SURFACE_INTERACTIONS                 |
| 16:30520856  | SETD1A   | REACTOME_INTEGRIN_CELL_SURFACE_INTERACTIONS                 |
| 16:31370452  | SETD1A   | REACTOME_INTEGRIN_CELL_SURFACE_INTERACTIONS                 |
| 17:42454243  | FAM171A2 | REACTOME_INTEGRIN_CELL_SURFACE_INTERACTIONS                 |
| 17:42454243  | FAM171A2 | REACTOME_INTEGRIN_SIGNALING                                 |
| 1:204876966  | RAB29    | REACTOME_INTERACTION_BETWEEN_L1_AND_ANKYRINS                |
| 1:204940972  | RAB29    | REACTOME_INTERACTION_BETWEEN_L1_AND_ANKYRINS                |
| 4:113947327  | CAMK2D   | REACTOME_INTERACTION_BETWEEN_L1_AND_ANKYRINS                |
| 4:114015252  | CAMK2D   | REACTOME_INTERACTION_BETWEEN_L1_AND_ANKYRINS                |
| 4:114032570  | CAMK2D   | REACTOME_INTERACTION_BETWEEN_L1_AND_ANKYRINS                |
| 4:114067233  | CAMK2D   | REACTOME_INTERACTION_BETWEEN_L1_AND_ANKYRINS                |
| 4:114077386  | CAMK2D   | REACTOME_INTERACTION_BETWEEN_L1_AND_ANKYRINS                |
| 4:114113772  | CAMK2D   | REACTOME_INTERACTION_BETWEEN_L1_AND_ANKYRINS                |
| 4:114122398  | CAMK2D   | REACTOME_INTERACTION_BETWEEN_L1_AND_ANKYRINS                |
| 4:114172749  | CAMK2D   | REACTOME_INTERACTION_BETWEEN_L1_AND_ANKYRINS                |
| 4:114217997  | CAMK2D   | REACTOME_INTERACTION_BETWEEN_L1_AND_ANKYRINS                |
| 3:122200170  | KPNA1    | REACTOME_INTERACTIONS_OF_VPR_WITH_HOST_CELLULAR_PROTEINS    |
| 16:30438930  | SETD1A   | REACTOME_INTERCONVERSION_OF_NUCLEOTIDE_DI_AND_TRIPHOSPHATES |
| 3:48748989   | IP6K2    | REACTOME_INTERFERON_ALPHA_BETA_SIGNALING                    |
| 3:48766111   | IP6K2    | REACTOME_INTERFERON_ALPHA_BETA_SIGNALING                    |
| 6:29798642   | TRIM40   | REACTOME_INTERFERON_ALPHA_BETA_SIGNALING                    |
| 17:6667554   | V1NB1    | REACTOME_INTERFERON_ALPHA_BETA_SIGNALING                    |
| 4:114424939  | CAMK2D   | REACTOME_INTERFERON_GAMMA_SIGNALING                         |
| 4:114494052  | CAMK2D   | REACTOME_INTERFERON_GAMMA_SIGNALING                         |
| 4:114529492  | CAMK2D   | REACTOME_INTERFERON_GAMMA_SIGNALING                         |
| 4:114539964  | CAMK2D   | REACTOME_INTERFERON_GAMMA_SIGNALING                         |
| 4:114597918  | CAMK2D   | REACTOME_INTERFERON_GAMMA_SIGNALING                         |
| 6:29798642   | TRIM40   | REACTOME_INTERFERON_GAMMA_SIGNALING                         |
| 6:30075864   | TRIM40   | REACTOME_INTERFERON_GAMMA_SIGNALING                         |
| 6:32602372   | HLA-DRB5 | REACTOME_INTERFERON_GAMMA_SIGNALING                         |
| 3:48748989   | IP6K2    | REACTOME_INTERFERON_SIGNALING                               |
| 3:48766111   | IP6K2    | REACTOME_INTERFERON_SIGNALING                               |
| 3:122200170  | KPNA1    | REACTOME_INTERFERON_SIGNALING                               |
| 4:114424939  | CAMK2D   | REACTOME_INTERFERON_SIGNALING                               |
| 4:114494052  | CAMK2D   | REACTOME_INTERFERON_SIGNALING                               |
| 4:114529492  | CAMK2D   | REACTOME_INTERFERON_SIGNALING                               |

|              |                 |                                         |
|--------------|-----------------|-----------------------------------------|
| 4:114539964  | <i>CAMK2D</i>   | REACTOME_INTERFERON_SIGNALING           |
| 4:114597918  | <i>CAMK2D</i>   | REACTOME_INTERFERON_SIGNALING           |
| 6:29798642   | <i>TRIM40</i>   | REACTOME_INTERFERON_SIGNALING           |
| 6:30075864   | <i>TRIM40</i>   | REACTOME_INTERFERON_SIGNALING           |
| 6:32602372   | <i>HLA-DRB5</i> | REACTOME_INTERFERON_SIGNALING           |
| 17:6667554   | <i>V1NB1</i>    | REACTOME_INTERFERON_SIGNALING           |
| 17:7479140   | <i>V1NB1</i>    | REACTOME_INTERFERON_SIGNALING           |
| 17:7480325   | <i>V1NB1</i>    | REACTOME_INTERFERON_SIGNALING           |
| 2:102612026  | <i>MAP4K4</i>   | REACTOME_INTERLEUKIN_10_SIGNALING       |
| 2:102621855  | <i>MAP4K4</i>   | REACTOME_INTERLEUKIN_10_SIGNALING       |
| 2:102631503  | <i>MAP4K4</i>   | REACTOME_INTERLEUKIN_10_SIGNALING       |
| 2:102633387  | <i>MAP4K4</i>   | REACTOME_INTERLEUKIN_10_SIGNALING       |
| 2:102720323  | <i>MAP4K4</i>   | REACTOME_INTERLEUKIN_10_SIGNALING       |
| 2:102783052  | <i>MAP4K4</i>   | REACTOME_INTERLEUKIN_10_SIGNALING       |
| 17:40392358  | <i>RETREG3</i>  | REACTOME_INTERLEUKIN_15_SIGNALING       |
| 5:133558885  | <i>C5orf24</i>  | REACTOME_INTERLEUKIN_17_SIGNALING       |
| 10:103185542 | <i>GBF1</i>     | REACTOME_INTERLEUKIN_17_SIGNALING       |
| 10:103305087 | <i>GBF1</i>     | REACTOME_INTERLEUKIN_17_SIGNALING       |
| 10:103308244 | <i>GBF1</i>     | REACTOME_INTERLEUKIN_17_SIGNALING       |
| 16:50730088  | <i>CASC16</i>   | REACTOME_INTERLEUKIN_17_SIGNALING       |
| 16:50730446  | <i>CASC16</i>   | REACTOME_INTERLEUKIN_17_SIGNALING       |
| 16:50745926  | <i>CASC16</i>   | REACTOME_INTERLEUKIN_17_SIGNALING       |
| 17:41845031  | <i>FAM171A2</i> | REACTOME_INTERLEUKIN_17_SIGNALING       |
| 2:103047986  | <i>MAP4K4</i>   | REACTOME_INTERLEUKIN_18_SIGNALING       |
| 2:103063855  | <i>MAP4K4</i>   | REACTOME_INTERLEUKIN_18_SIGNALING       |
| 2:103066346  | <i>MAP4K4</i>   | REACTOME_INTERLEUKIN_18_SIGNALING       |
| 2:102612026  | <i>MAP4K4</i>   | REACTOME_INTERLEUKIN_1_FAMILY_SIGNALING |
| 2:102621855  | <i>MAP4K4</i>   | REACTOME_INTERLEUKIN_1_FAMILY_SIGNALING |
| 2:102631503  | <i>MAP4K4</i>   | REACTOME_INTERLEUKIN_1_FAMILY_SIGNALING |
| 2:102633387  | <i>MAP4K4</i>   | REACTOME_INTERLEUKIN_1_FAMILY_SIGNALING |
| 2:102720323  | <i>MAP4K4</i>   | REACTOME_INTERLEUKIN_1_FAMILY_SIGNALING |
| 2:102783052  | <i>MAP4K4</i>   | REACTOME_INTERLEUKIN_1_FAMILY_SIGNALING |
| 2:102826146  | <i>MAP4K4</i>   | REACTOME_INTERLEUKIN_1_FAMILY_SIGNALING |
| 2:103047986  | <i>MAP4K4</i>   | REACTOME_INTERLEUKIN_1_FAMILY_SIGNALING |
| 2:103063855  | <i>MAP4K4</i>   | REACTOME_INTERLEUKIN_1_FAMILY_SIGNALING |
| 2:103066346  | <i>MAP4K4</i>   | REACTOME_INTERLEUKIN_1_FAMILY_SIGNALING |
| 6:32151443   | <i>HLA-DRB5</i> | REACTOME_INTERLEUKIN_1_FAMILY_SIGNALING |
| 10:103185542 | <i>GBF1</i>     | REACTOME_INTERLEUKIN_1_FAMILY_SIGNALING |
| 10:103305087 | <i>GBF1</i>     | REACTOME_INTERLEUKIN_1_FAMILY_SIGNALING |
| 10:103308244 | <i>GBF1</i>     | REACTOME_INTERLEUKIN_1_FAMILY_SIGNALING |
| 16:50730088  | <i>CASC16</i>   | REACTOME_INTERLEUKIN_1_FAMILY_SIGNALING |
| 16:50730446  | <i>CASC16</i>   | REACTOME_INTERLEUKIN_1_FAMILY_SIGNALING |
| 16:50745926  | <i>CASC16</i>   | REACTOME_INTERLEUKIN_1_FAMILY_SIGNALING |
| 2:102612026  | <i>MAP4K4</i>   | REACTOME_INTERLEUKIN_1_SIGNALING        |
| 2:102621855  | <i>MAP4K4</i>   | REACTOME_INTERLEUKIN_1_SIGNALING        |
| 2:102631503  | <i>MAP4K4</i>   | REACTOME_INTERLEUKIN_1_SIGNALING        |
| 2:102633387  | <i>MAP4K4</i>   | REACTOME_INTERLEUKIN_1_SIGNALING        |
| 2:102720323  | <i>MAP4K4</i>   | REACTOME_INTERLEUKIN_1_SIGNALING        |
| 2:102783052  | <i>MAP4K4</i>   | REACTOME_INTERLEUKIN_1_SIGNALING        |
| 6:32151443   | <i>HLA-DRB5</i> | REACTOME_INTERLEUKIN_1_SIGNALING        |
| 10:103185542 | <i>GBF1</i>     | REACTOME_INTERLEUKIN_1_SIGNALING        |
| 10:103305087 | <i>GBF1</i>     | REACTOME_INTERLEUKIN_1_SIGNALING        |
| 10:103308244 | <i>GBF1</i>     | REACTOME_INTERLEUKIN_1_SIGNALING        |

|              |                |                                                           |
|--------------|----------------|-----------------------------------------------------------|
| 16:50730088  | <i>CASC16</i>  | REACTOME_INTERLEUKIN_1_SIGNALING                          |
| 16:50730446  | <i>CASC16</i>  | REACTOME_INTERLEUKIN_1_SIGNALING                          |
| 16:50745926  | <i>CASC16</i>  | REACTOME_INTERLEUKIN_1_SIGNALING                          |
| 17:40392358  | <i>RETREG3</i> | REACTOME_INTERLEUKIN_20_FAMILY_SIGNALING                  |
| 17:40392358  | <i>RETREG3</i> | REACTOME_INTERLEUKIN_21_SIGNALING                         |
| 17:40392358  | <i>RETREG3</i> | REACTOME_INTERLEUKIN_2_FAMILY_SIGNALING                   |
| 17:40392358  | <i>RETREG3</i> | REACTOME_INTERLEUKIN_2_SIGNALING                          |
| 2:102826146  | <i>MAP4K4</i>  | REACTOME_INTERLEUKIN_36_PATHWAY                           |
| 6:112137847  | <i>FYN</i>     | REACTOME_INTERLEUKIN_3_INTERLEUKIN_5_AND_GM-CSF_SIGNALING |
| 6:112151452  | <i>FYN</i>     | REACTOME_INTERLEUKIN_3_INTERLEUKIN_5_AND_GM-CSF_SIGNALING |
| 6:112175069  | <i>FYN</i>     | REACTOME_INTERLEUKIN_3_INTERLEUKIN_5_AND_GM-CSF_SIGNALING |
| 17:40392358  | <i>RETREG3</i> | REACTOME_INTERLEUKIN_3_INTERLEUKIN_5_AND_GM-CSF_SIGNALING |
| 15:61016235  | <i>VPS13C</i>  | REACTOME_INTERLEUKIN_4_AND_INTERLEUKIN_13_SIGNALING       |
| 15:61065568  | <i>VPS13C</i>  | REACTOME_INTERLEUKIN_4_AND_INTERLEUKIN_13_SIGNALING       |
| 15:61094298  | <i>VPS13C</i>  | REACTOME_INTERLEUKIN_4_AND_INTERLEUKIN_13_SIGNALING       |
| 15:61140736  | <i>VPS13C</i>  | REACTOME_INTERLEUKIN_4_AND_INTERLEUKIN_13_SIGNALING       |
| 15:61142062  | <i>VPS13C</i>  | REACTOME_INTERLEUKIN_4_AND_INTERLEUKIN_13_SIGNALING       |
| 15:61162571  | <i>VPS13C</i>  | REACTOME_INTERLEUKIN_4_AND_INTERLEUKIN_13_SIGNALING       |
| 15:61191617  | <i>VPS13C</i>  | REACTOME_INTERLEUKIN_4_AND_INTERLEUKIN_13_SIGNALING       |
| 15:61195427  | <i>VPS13C</i>  | REACTOME_INTERLEUKIN_4_AND_INTERLEUKIN_13_SIGNALING       |
| 15:61221682  | <i>VPS13C</i>  | REACTOME_INTERLEUKIN_4_AND_INTERLEUKIN_13_SIGNALING       |
| 15:61298486  | <i>VPS13C</i>  | REACTOME_INTERLEUKIN_4_AND_INTERLEUKIN_13_SIGNALING       |
| 15:61375480  | <i>VPS13C</i>  | REACTOME_INTERLEUKIN_4_AND_INTERLEUKIN_13_SIGNALING       |
| 15:61434581  | <i>VPS13C</i>  | REACTOME_INTERLEUKIN_4_AND_INTERLEUKIN_13_SIGNALING       |
| 15:61467078  | <i>VPS13C</i>  | REACTOME_INTERLEUKIN_4_AND_INTERLEUKIN_13_SIGNALING       |
| 15:61470808  | <i>VPS13C</i>  | REACTOME_INTERLEUKIN_4_AND_INTERLEUKIN_13_SIGNALING       |
| 15:61500263  | <i>VPS13C</i>  | REACTOME_INTERLEUKIN_4_AND_INTERLEUKIN_13_SIGNALING       |
| 16:31370452  | <i>SETD1A</i>  | REACTOME_INTERLEUKIN_4_AND_INTERLEUKIN_13_SIGNALING       |
| 17:7578671   | <i>V1NB1</i>   | REACTOME_INTERLEUKIN_4_AND_INTERLEUKIN_13_SIGNALING       |
| 17:40392358  | <i>RETREG3</i> | REACTOME_INTERLEUKIN_7_SIGNALING                          |
| 17:40392358  | <i>RETREG3</i> | REACTOME_INTERLEUKIN_9_SIGNALING                          |
| 3:48835245   | <i>IP6K2</i>   | REACTOME_INTRACELLULAR_SIGNALING_BY_SECOND_MESSENGERS     |
| 3:123089448  | <i>KPNA1</i>   | REACTOME_INTRACELLULAR_SIGNALING_BY_SECOND_MESSENGERS     |
| 4:114424939  | <i>CAMK2D</i>  | REACTOME_INTRACELLULAR_SIGNALING_BY_SECOND_MESSENGERS     |
| 4:114494052  | <i>CAMK2D</i>  | REACTOME_INTRACELLULAR_SIGNALING_BY_SECOND_MESSENGERS     |
| 4:114529492  | <i>CAMK2D</i>  | REACTOME_INTRACELLULAR_SIGNALING_BY_SECOND_MESSENGERS     |
| 4:114539964  | <i>CAMK2D</i>  | REACTOME_INTRACELLULAR_SIGNALING_BY_SECOND_MESSENGERS     |
| 4:114597918  | <i>CAMK2D</i>  | REACTOME_INTRACELLULAR_SIGNALING_BY_SECOND_MESSENGERS     |
| 5:133558885  | <i>C5orf24</i> | REACTOME_INTRACELLULAR_SIGNALING_BY_SECOND_MESSENGERS     |
| 6:112137847  | <i>FYN</i>     | REACTOME_INTRACELLULAR_SIGNALING_BY_SECOND_MESSENGERS     |
| 6:112151452  | <i>FYN</i>     | REACTOME_INTRACELLULAR_SIGNALING_BY_SECOND_MESSENGERS     |
| 6:112175069  | <i>FYN</i>     | REACTOME_INTRACELLULAR_SIGNALING_BY_SECOND_MESSENGERS     |
| 8:131799767  | <i>FAM49B</i>  | REACTOME_INTRACELLULAR_SIGNALING_BY_SECOND_MESSENGERS     |
| 8:131845512  | <i>FAM49B</i>  | REACTOME_INTRACELLULAR_SIGNALING_BY_SECOND_MESSENGERS     |
| 8:131865425  | <i>FAM49B</i>  | REACTOME_INTRACELLULAR_SIGNALING_BY_SECOND_MESSENGERS     |
| 8:131901170  | <i>FAM49B</i>  | REACTOME_INTRACELLULAR_SIGNALING_BY_SECOND_MESSENGERS     |
| 16:50300511  | <i>CASC16</i>  | REACTOME_INTRACELLULAR_SIGNALING_BY_SECOND_MESSENGERS     |
| 16:50317039  | <i>CASC16</i>  | REACTOME_INTRACELLULAR_SIGNALING_BY_SECOND_MESSENGERS     |
| 17:7578671   | <i>V1NB1</i>   | REACTOME_INTRACELLULAR_SIGNALING_BY_SECOND_MESSENGERS     |
| 1:171689486  | <i>VAMP4</i>   | REACTOME_INTRA_GOLGI_AND_RETROGRADE_GOLGI_TO_ER_TRAFFIC   |
| 2:135921205  | <i>TMEM163</i> | REACTOME_INTRA_GOLGI_AND_RETROGRADE_GOLGI_TO_ER_TRAFFIC   |
| 10:104005410 | <i>GBF1</i>    | REACTOME_INTRA_GOLGI_AND_RETROGRADE_GOLGI_TO_ER_TRAFFIC   |
| 10:104034550 | <i>GBF1</i>    | REACTOME_INTRA_GOLGI_AND_RETROGRADE_GOLGI_TO_ER_TRAFFIC   |

|              |                |                                                         |
|--------------|----------------|---------------------------------------------------------|
| 10:104258303 | <i>GBF1</i>    | REACTOME_INTRA_GOLGI_AND_RETROGRADE_GOLGI_TO_ER_TRAFFIC |
| 11:82719121  | <i>DLG2</i>    | REACTOME_INTRA_GOLGI_AND_RETROGRADE_GOLGI_TO_ER_TRAFFIC |
| 12:39759090  | <i>LRRK2_2</i> | REACTOME_INTRA_GOLGI_AND_RETROGRADE_GOLGI_TO_ER_TRAFFIC |
| 12:39826709  | <i>LRRK2_2</i> | REACTOME_INTRA_GOLGI_AND_RETROGRADE_GOLGI_TO_ER_TRAFFIC |
| 17:43017194  | <i>CRHR1_2</i> | REACTOME_INTRA_GOLGI_AND_RETROGRADE_GOLGI_TO_ER_TRAFFIC |
| 17:43021962  | <i>CRHR1_2</i> | REACTOME_INTRA_GOLGI_AND_RETROGRADE_GOLGI_TO_ER_TRAFFIC |
| 17:44800946  | <i>WNT3</i>    | REACTOME_INTRA_GOLGI_AND_RETROGRADE_GOLGI_TO_ER_TRAFFIC |
| 17:44833217  | <i>WNT3</i>    | REACTOME_INTRA_GOLGI_AND_RETROGRADE_GOLGI_TO_ER_TRAFFIC |
| 17:45020426  | <i>WNT3</i>    | REACTOME_INTRA_GOLGI_AND_RETROGRADE_GOLGI_TO_ER_TRAFFIC |
| 17:45059032  | <i>WNT3</i>    | REACTOME_INTRA_GOLGI_AND_RETROGRADE_GOLGI_TO_ER_TRAFFIC |
| 17:45089680  | <i>WNT3</i>    | REACTOME_INTRA_GOLGI_AND_RETROGRADE_GOLGI_TO_ER_TRAFFIC |
| 17:76727455  | <i>DNAH17</i>  | REACTOME_INTRA_GOLGI_AND_RETROGRADE_GOLGI_TO_ER_TRAFFIC |
| 11:82719121  | <i>DLG2</i>    | REACTOME_INTRA_GOLGI_TRAFFIC                            |
| 17:44800946  | <i>WNT3</i>    | REACTOME_INTRA_GOLGI_TRAFFIC                            |
| 17:44833217  | <i>WNT3</i>    | REACTOME_INTRA_GOLGI_TRAFFIC                            |
| 17:45020426  | <i>WNT3</i>    | REACTOME_INTRA_GOLGI_TRAFFIC                            |
| 17:45059032  | <i>WNT3</i>    | REACTOME_INTRA_GOLGI_TRAFFIC                            |
| 17:45089680  | <i>WNT3</i>    | REACTOME_INTRA_GOLGI_TRAFFIC                            |
| 17:76727455  | <i>DNAH17</i>  | REACTOME_INTRA_GOLGI_TRAFFIC                            |
| 17:7578671   | <i>V1NB1</i>   | REACTOME_INTRINSIC_PATHWAY_FOR_APOPTOSIS                |
| 17:43181287  | <i>CRHR1_2</i> | REACTOME_INTRINSIC_PATHWAY_FOR_APOPTOSIS                |
| 17:43184627  | <i>CRHR1_2</i> | REACTOME_INTRINSIC_PATHWAY_FOR_APOPTOSIS                |
| 11:82582134  | <i>DLG2</i>    | REACTOME_INTRINSIC_PATHWAY_OF_FIBRIN_CLOT_FORMATION     |
| 11:82635123  | <i>DLG2</i>    | REACTOME_INTRINSIC_PATHWAY_OF_FIBRIN_CLOT_FORMATION     |
| 11:82648357  | <i>DLG2</i>    | REACTOME_INTRINSIC_PATHWAY_OF_FIBRIN_CLOT_FORMATION     |
| 6:29565889   | <i>TRIM40</i>  | REACTOME_INWARDLY_RECTIFYING_KPLUS_CHANNELS             |
| 6:29590715   | <i>TRIM40</i>  | REACTOME_INWARDLY_RECTIFYING_KPLUS_CHANNELS             |
| 19:2557113   | <i>SPPL2B</i>  | REACTOME_INWARDLY_RECTIFYING_KPLUS_CHANNELS             |
| 19:2563327   | <i>SPPL2B</i>  | REACTOME_INWARDLY_RECTIFYING_KPLUS_CHANNELS             |
| 19:2580057   | <i>SPPL2B</i>  | REACTOME_INWARDLY_RECTIFYING_KPLUS_CHANNELS             |
| 19:2660983   | <i>SPPL2B</i>  | REACTOME_INWARDLY_RECTIFYING_KPLUS_CHANNELS             |
| 21:38984964  | <i>DYRK1A</i>  | REACTOME_INWARDLY_RECTIFYING_KPLUS_CHANNELS             |
| 21:39018136  | <i>DYRK1A</i>  | REACTOME_INWARDLY_RECTIFYING_KPLUS_CHANNELS             |
| 21:39021814  | <i>DYRK1A</i>  | REACTOME_INWARDLY_RECTIFYING_KPLUS_CHANNELS             |
| 21:39039956  | <i>DYRK1A</i>  | REACTOME_INWARDLY_RECTIFYING_KPLUS_CHANNELS             |
| 21:39088785  | <i>DYRK1A</i>  | REACTOME_INWARDLY_RECTIFYING_KPLUS_CHANNELS             |
| 21:39108160  | <i>DYRK1A</i>  | REACTOME_INWARDLY_RECTIFYING_KPLUS_CHANNELS             |
| 21:39120480  | <i>DYRK1A</i>  | REACTOME_INWARDLY_RECTIFYING_KPLUS_CHANNELS             |
| 21:39134980  | <i>DYRK1A</i>  | REACTOME_INWARDLY_RECTIFYING_KPLUS_CHANNELS             |
| 21:39197323  | <i>DYRK1A</i>  | REACTOME_INWARDLY_RECTIFYING_KPLUS_CHANNELS             |
| 21:39217472  | <i>DYRK1A</i>  | REACTOME_INWARDLY_RECTIFYING_KPLUS_CHANNELS             |
| 1:154306180  | <i>GBAP1</i>   | REACTOME_ION_CHANNEL_TRANSPORT                          |
| 4:114424939  | <i>CAMK2D</i>  | REACTOME_ION_CHANNEL_TRANSPORT                          |
| 4:114494052  | <i>CAMK2D</i>  | REACTOME_ION_CHANNEL_TRANSPORT                          |
| 4:114529492  | <i>CAMK2D</i>  | REACTOME_ION_CHANNEL_TRANSPORT                          |
| 4:114539964  | <i>CAMK2D</i>  | REACTOME_ION_CHANNEL_TRANSPORT                          |
| 4:114597918  | <i>CAMK2D</i>  | REACTOME_ION_CHANNEL_TRANSPORT                          |
| 4:170563153  | <i>CLCN3</i>   | REACTOME_ION_CHANNEL_TRANSPORT                          |
| 4:170569172  | <i>CLCN3</i>   | REACTOME_ION_CHANNEL_TRANSPORT                          |
| 4:170620812  | <i>CLCN3</i>   | REACTOME_ION_CHANNEL_TRANSPORT                          |
| 12:45755099  | <i>SCAF11</i>  | REACTOME_ION_CHANNEL_TRANSPORT                          |
| 12:124219791 | <i>HIP1R</i>   | REACTOME_ION_CHANNEL_TRANSPORT                          |
| 17:7560294   | <i>V1NB1</i>   | REACTOME_ION_CHANNEL_TRANSPORT                          |

|              |                 |                                                                                            |
|--------------|-----------------|--------------------------------------------------------------------------------------------|
| 17:40938261  | <i>RETREG3</i>  | REACTOME_ION_CHANNEL_TRANSPORT                                                             |
| 19:1811130   | <i>SPPL2B</i>   | REACTOME_ION_CHANNEL_TRANSPORT                                                             |
| 4:114424939  | <i>CAMK2D</i>   | REACTOME_ION_HOMEOSTASIS                                                                   |
| 4:114494052  | <i>CAMK2D</i>   | REACTOME_ION_HOMEOSTASIS                                                                   |
| 4:114529492  | <i>CAMK2D</i>   | REACTOME_ION_HOMEOSTASIS                                                                   |
| 4:114539964  | <i>CAMK2D</i>   | REACTOME_ION_HOMEOSTASIS                                                                   |
| 4:114597918  | <i>CAMK2D</i>   | REACTOME_ION_HOMEOSTASIS                                                                   |
| 17:7560294   | <i>V1NB1</i>    | REACTOME_ION_HOMEOSTASIS                                                                   |
| 17:7101771   | <i>V1NB1</i>    | REACTOME_IONOTROPIC_ACTIVITY_OF_KAINATE_RECEPTORS                                          |
| 1:154306180  | <i>GBAP1</i>    | REACTOME_ION_TRANSPORT_BY_P_TYPE_ATPASES                                                   |
| 4:114424939  | <i>CAMK2D</i>   | REACTOME_ION_TRANSPORT_BY_P_TYPE_ATPASES                                                   |
| 4:114494052  | <i>CAMK2D</i>   | REACTOME_ION_TRANSPORT_BY_P_TYPE_ATPASES                                                   |
| 4:114529492  | <i>CAMK2D</i>   | REACTOME_ION_TRANSPORT_BY_P_TYPE_ATPASES                                                   |
| 4:114539964  | <i>CAMK2D</i>   | REACTOME_ION_TRANSPORT_BY_P_TYPE_ATPASES                                                   |
| 4:114597918  | <i>CAMK2D</i>   | REACTOME_ION_TRANSPORT_BY_P_TYPE_ATPASES                                                   |
| 17:7560294   | <i>V1NB1</i>    | REACTOME_ION_TRANSPORT_BY_P_TYPE_ATPASES                                                   |
| 19:1811130   | <i>SPPL2B</i>   | REACTOME_ION_TRANSPORT_BY_P_TYPE_ATPASES                                                   |
| 1:156059276  | <i>GBAP1</i>    | REACTOME_IRE1ALPHA_ACTIVATES_CHAPERONES                                                    |
| 3:122841099  | <i>KPNA1</i>    | REACTOME_IRE1ALPHA_ACTIVATES_CHAPERONES                                                    |
| 3:122859868  | <i>KPNA1</i>    | REACTOME_IRE1ALPHA_ACTIVATES_CHAPERONES                                                    |
| 3:122898729  | <i>KPNA1</i>    | REACTOME_IRE1ALPHA_ACTIVATES_CHAPERONES                                                    |
| 3:150298317  | <i>MED12L</i>   | REACTOME_IRE1ALPHA_ACTIVATES_CHAPERONES                                                    |
| 3:150303590  | <i>MED12L</i>   | REACTOME_IRE1ALPHA_ACTIVATES_CHAPERONES                                                    |
| 17:45020426  | <i>WNT3</i>     | REACTOME_IRE1ALPHA_ACTIVATES_CHAPERONES                                                    |
| 17:45059032  | <i>WNT3</i>     | REACTOME_IRE1ALPHA_ACTIVATES_CHAPERONES                                                    |
| 17:45089680  | <i>WNT3</i>     | REACTOME_IRE1ALPHA_ACTIVATES_CHAPERONES                                                    |
| 4:15608677   | <i>BST1</i>     | REACTOME_IRON_UPTAKE_AND_TRANSPORT                                                         |
| 4:15618898   | <i>BST1</i>     | REACTOME_IRON_UPTAKE_AND_TRANSPORT                                                         |
| 12:124219791 | <i>HIP1R</i>    | REACTOME_IRON_UPTAKE_AND_TRANSPORT                                                         |
| 16:50730088  | <i>CASC16</i>   | REACTOME_JNK_C_JUN_KINASES_PHOSPHORYLATION_AND_ACTIVATION_MEDIATED_BY_ACTIVATED_HUMAN_TAK1 |
| 16:50730446  | <i>CASC16</i>   | REACTOME_JNK_C_JUN_KINASES_PHOSPHORYLATION_AND_ACTIVATION_MEDIATED_BY_ACTIVATED_HUMAN_TAK1 |
| 16:50745926  | <i>CASC16</i>   | REACTOME_JNK_C_JUN_KINASES_PHOSPHORYLATION_AND_ACTIVATION_MEDIATED_BY_ACTIVATED_HUMAN_TAK1 |
| 17:39883520  | <i>RETREG3</i>  | REACTOME_KERATINIZATION                                                                    |
| 12:39759090  | <i>LRRK2_2</i>  | REACTOME_KINESINS                                                                          |
| 12:39826709  | <i>LRRK2_2</i>  | REACTOME_KINESINS                                                                          |
| 17:43017194  | <i>CRHR1_2</i>  | REACTOME_KINESINS                                                                          |
| 17:43021962  | <i>CRHR1_2</i>  | REACTOME_KINESINS                                                                          |
| 1:171837985  | <i>VAMP4</i>    | REACTOME_L1CAM_INTERACTIONS                                                                |
| 1:171945488  | <i>VAMP4</i>    | REACTOME_L1CAM_INTERACTIONS                                                                |
| 1:172137119  | <i>VAMP4</i>    | REACTOME_L1CAM_INTERACTIONS                                                                |
| 1:172386261  | <i>VAMP4</i>    | REACTOME_L1CAM_INTERACTIONS                                                                |
| 1:204876966  | <i>RAB29</i>    | REACTOME_L1CAM_INTERACTIONS                                                                |
| 1:204940972  | <i>RAB29</i>    | REACTOME_L1CAM_INTERACTIONS                                                                |
| 4:113947327  | <i>CAMK2D</i>   | REACTOME_L1CAM_INTERACTIONS                                                                |
| 4:114015252  | <i>CAMK2D</i>   | REACTOME_L1CAM_INTERACTIONS                                                                |
| 4:114032570  | <i>CAMK2D</i>   | REACTOME_L1CAM_INTERACTIONS                                                                |
| 4:114067233  | <i>CAMK2D</i>   | REACTOME_L1CAM_INTERACTIONS                                                                |
| 4:114077386  | <i>CAMK2D</i>   | REACTOME_L1CAM_INTERACTIONS                                                                |
| 4:114113772  | <i>CAMK2D</i>   | REACTOME_L1CAM_INTERACTIONS                                                                |
| 4:114122398  | <i>CAMK2D</i>   | REACTOME_L1CAM_INTERACTIONS                                                                |
| 4:114172749  | <i>CAMK2D</i>   | REACTOME_L1CAM_INTERACTIONS                                                                |
| 4:114217997  | <i>CAMK2D</i>   | REACTOME_L1CAM_INTERACTIONS                                                                |
| 9:17579690   | <i>SH3GL2_2</i> | REACTOME_L1CAM_INTERACTIONS                                                                |

|             |                 |                                                       |
|-------------|-----------------|-------------------------------------------------------|
| 9:17587160  | <i>SH3GL2_2</i> | REACTOME_L1CAM_INTERACTIONS                           |
| 9:17609302  | <i>SH3GL2_2</i> | REACTOME_L1CAM_INTERACTIONS                           |
| 9:17626762  | <i>SH3GL2_2</i> | REACTOME_L1CAM_INTERACTIONS                           |
| 9:17627444  | <i>SH3GL2_2</i> | REACTOME_L1CAM_INTERACTIONS                           |
| 9:17642664  | <i>SH3GL2_2</i> | REACTOME_L1CAM_INTERACTIONS                           |
| 9:17710876  | <i>SH3GL2_2</i> | REACTOME_L1CAM_INTERACTIONS                           |
| 9:17732590  | <i>SH3GL2_2</i> | REACTOME_L1CAM_INTERACTIONS                           |
| 9:17737514  | <i>SH3GL2_2</i> | REACTOME_L1CAM_INTERACTIONS                           |
| 9:17758945  | <i>SH3GL2_2</i> | REACTOME_L1CAM_INTERACTIONS                           |
| 12:41144387 | <i>LRRK2_2</i>  | REACTOME_L1CAM_INTERACTIONS                           |
| 12:41147295 | <i>LRRK2_2</i>  | REACTOME_L1CAM_INTERACTIONS                           |
| 12:41195135 | <i>LRRK2_2</i>  | REACTOME_L1CAM_INTERACTIONS                           |
| 12:41251554 | <i>LRRK2_2</i>  | REACTOME_L1CAM_INTERACTIONS                           |
| 12:41255129 | <i>LRRK2_2</i>  | REACTOME_L1CAM_INTERACTIONS                           |
| 12:41297969 | <i>LRRK2_2</i>  | REACTOME_L1CAM_INTERACTIONS                           |
| 12:41407403 | <i>LRRK2_2</i>  | REACTOME_L1CAM_INTERACTIONS                           |
| 17:7101771  | <i>V1NB1</i>    | REACTOME_L1CAM_INTERACTIONS                           |
| 17:42454243 | <i>FAM171A2</i> | REACTOME_L1CAM_INTERACTIONS                           |
| 3:49162284  | <i>IP6K2</i>    | REACTOME_LAMININ_INTERACTIONS                         |
| 3:49162583  | <i>IP6K2</i>    | REACTOME_LAMININ_INTERACTIONS                         |
| 6:112494762 | <i>FYN</i>      | REACTOME_LAMININ_INTERACTIONS                         |
| 6:112531401 | <i>FYN</i>      | REACTOME_LAMININ_INTERACTIONS                         |
| 6:112561154 | <i>FYN</i>      | REACTOME_LAMININ_INTERACTIONS                         |
| 6:112561430 | <i>FYN</i>      | REACTOME_LAMININ_INTERACTIONS                         |
| 8:22007293  | <i>BIN3</i>     | REACTOME_LGI_ADAM_INTERACTIONS                        |
| 16:31004169 | <i>SETD1A</i>   | REACTOME_LGI_ADAM_INTERACTIONS                        |
| 17:7101771  | <i>V1NB1</i>    | REACTOME_LGI_ADAM_INTERACTIONS                        |
| 17:42855931 | <i>CRHR1_2</i>  | REACTOME_LGI_ADAM_INTERACTIONS                        |
| 9:17579690  | <i>SH3GL2_2</i> | REACTOME_LISTERIA_MONOCYTOGENES_ENTRY_INTO_HOST_CELLS |
| 9:17587160  | <i>SH3GL2_2</i> | REACTOME_LISTERIA_MONOCYTOGENES_ENTRY_INTO_HOST_CELLS |
| 9:17609302  | <i>SH3GL2_2</i> | REACTOME_LISTERIA_MONOCYTOGENES_ENTRY_INTO_HOST_CELLS |
| 9:17626762  | <i>SH3GL2_2</i> | REACTOME_LISTERIA_MONOCYTOGENES_ENTRY_INTO_HOST_CELLS |
| 9:17627444  | <i>SH3GL2_2</i> | REACTOME_LISTERIA_MONOCYTOGENES_ENTRY_INTO_HOST_CELLS |
| 9:17642664  | <i>SH3GL2_2</i> | REACTOME_LISTERIA_MONOCYTOGENES_ENTRY_INTO_HOST_CELLS |
| 9:17710876  | <i>SH3GL2_2</i> | REACTOME_LISTERIA_MONOCYTOGENES_ENTRY_INTO_HOST_CELLS |
| 9:17732590  | <i>SH3GL2_2</i> | REACTOME_LISTERIA_MONOCYTOGENES_ENTRY_INTO_HOST_CELLS |
| 9:17737514  | <i>SH3GL2_2</i> | REACTOME_LISTERIA_MONOCYTOGENES_ENTRY_INTO_HOST_CELLS |
| 9:17758945  | <i>SH3GL2_2</i> | REACTOME_LISTERIA_MONOCYTOGENES_ENTRY_INTO_HOST_CELLS |
| 4:114424939 | <i>CAMK2D</i>   | REACTOME_LONG_TERM_POTENTIATION                       |
| 4:114494052 | <i>CAMK2D</i>   | REACTOME_LONG_TERM_POTENTIATION                       |
| 4:114529492 | <i>CAMK2D</i>   | REACTOME_LONG_TERM_POTENTIATION                       |
| 4:114539964 | <i>CAMK2D</i>   | REACTOME_LONG_TERM_POTENTIATION                       |
| 4:114597918 | <i>CAMK2D</i>   | REACTOME_LONG_TERM_POTENTIATION                       |
| 11:83219006 | <i>DLG2</i>     | REACTOME_LONG_TERM_POTENTIATION                       |
| 11:83232915 | <i>DLG2</i>     | REACTOME_LONG_TERM_POTENTIATION                       |
| 11:83282740 | <i>DLG2</i>     | REACTOME_LONG_TERM_POTENTIATION                       |
| 11:83387273 | <i>DLG2</i>     | REACTOME_LONG_TERM_POTENTIATION                       |
| 11:83538733 | <i>DLG2</i>     | REACTOME_LONG_TERM_POTENTIATION                       |
| 11:83544472 | <i>DLG2</i>     | REACTOME_LONG_TERM_POTENTIATION                       |
| 11:83578152 | <i>DLG2</i>     | REACTOME_LONG_TERM_POTENTIATION                       |
| 11:83647657 | <i>DLG2</i>     | REACTOME_LONG_TERM_POTENTIATION                       |
| 11:83669903 | <i>DLG2</i>     | REACTOME_LONG_TERM_POTENTIATION                       |
| 11:83736246 | <i>DLG2</i>     | REACTOME_LONG_TERM_POTENTIATION                       |

|              |                 |                                                   |
|--------------|-----------------|---------------------------------------------------|
| 11:83762918  | <i>DLG2</i>     | REACTOME_LONG_TERM_POTENTIATION                   |
| 11:83823752  | <i>DLG2</i>     | REACTOME_LONG_TERM_POTENTIATION                   |
| 11:83839992  | <i>DLG2</i>     | REACTOME_LONG_TERM_POTENTIATION                   |
| 11:84104763  | <i>DLG2</i>     | REACTOME_LONG_TERM_POTENTIATION                   |
| 11:84169039  | <i>DLG2</i>     | REACTOME_LONG_TERM_POTENTIATION                   |
| 11:84221628  | <i>DLG2</i>     | REACTOME_LONG_TERM_POTENTIATION                   |
| 11:84312008  | <i>DLG2</i>     | REACTOME_LONG_TERM_POTENTIATION                   |
| 11:84324361  | <i>DLG2</i>     | REACTOME_LONG_TERM_POTENTIATION                   |
| 11:84360346  | <i>DLG2</i>     | REACTOME_LONG_TERM_POTENTIATION                   |
| 11:84403409  | <i>DLG2</i>     | REACTOME_LONG_TERM_POTENTIATION                   |
| 17:7101771   | <i>V1NB1</i>    | REACTOME_LONG_TERM_POTENTIATION                   |
| 14:37176333  | <i>MIPOL1</i>   | REACTOME_LYSINE_CATABOLISM                        |
| 14:37176342  | <i>MIPOL1</i>   | REACTOME_LYSINE_CATABOLISM                        |
| 14:37226055  | <i>MIPOL1</i>   | REACTOME_LYSINE_CATABOLISM                        |
| 14:37268679  | <i>MIPOL1</i>   | REACTOME_LYSINE_CATABOLISM                        |
| 14:37354184  | <i>MIPOL1</i>   | REACTOME_LYSINE_CATABOLISM                        |
| 14:37385108  | <i>MIPOL1</i>   | REACTOME_LYSINE_CATABOLISM                        |
| 14:37445399  | <i>MIPOL1</i>   | REACTOME_LYSINE_CATABOLISM                        |
| 14:37472311  | <i>MIPOL1</i>   | REACTOME_LYSINE_CATABOLISM                        |
| 9:17579690   | <i>SH3GL2_2</i> | REACTOME_LYSOSOME_VESICLE_BIOGENESIS              |
| 9:17587160   | <i>SH3GL2_2</i> | REACTOME_LYSOSOME_VESICLE_BIOGENESIS              |
| 9:17609302   | <i>SH3GL2_2</i> | REACTOME_LYSOSOME_VESICLE_BIOGENESIS              |
| 9:17626762   | <i>SH3GL2_2</i> | REACTOME_LYSOSOME_VESICLE_BIOGENESIS              |
| 9:17627444   | <i>SH3GL2_2</i> | REACTOME_LYSOSOME_VESICLE_BIOGENESIS              |
| 9:17642664   | <i>SH3GL2_2</i> | REACTOME_LYSOSOME_VESICLE_BIOGENESIS              |
| 9:17710876   | <i>SH3GL2_2</i> | REACTOME_LYSOSOME_VESICLE_BIOGENESIS              |
| 9:17732590   | <i>SH3GL2_2</i> | REACTOME_LYSOSOME_VESICLE_BIOGENESIS              |
| 9:17737514   | <i>SH3GL2_2</i> | REACTOME_LYSOSOME_VESICLE_BIOGENESIS              |
| 9:17758945   | <i>SH3GL2_2</i> | REACTOME_LYSOSOME_VESICLE_BIOGENESIS              |
| 12:133295501 | <i>FBRSL1</i>   | REACTOME_MACROAUTOPHAGY                           |
| 14:55871532  | <i>GCH1</i>     | REACTOME_MACROAUTOPHAGY                           |
| 17:42454243  | <i>FAM171A2</i> | REACTOME_MAP2K_AND_MAPK_ACTIVATION                |
| 10:103185542 | <i>GBF1</i>     | REACTOME_MAP3K8_TPL2_DEPENDENT_MAPK1_3_ACTIVATION |
| 10:103305087 | <i>GBF1</i>     | REACTOME_MAP3K8_TPL2_DEPENDENT_MAPK1_3_ACTIVATION |
| 10:103308244 | <i>GBF1</i>     | REACTOME_MAP3K8_TPL2_DEPENDENT_MAPK1_3_ACTIVATION |
| 18:48228968  | <i>MEX3C</i>    | REACTOME_MAPK6_MAPK4_SIGNALING                    |
| 4:114424939  | <i>CAMK2D</i>   | REACTOME_MAPK_FAMILY_SIGNALING_CASCADES           |
| 4:114494052  | <i>CAMK2D</i>   | REACTOME_MAPK_FAMILY_SIGNALING_CASCADES           |
| 4:114529492  | <i>CAMK2D</i>   | REACTOME_MAPK_FAMILY_SIGNALING_CASCADES           |
| 4:114539964  | <i>CAMK2D</i>   | REACTOME_MAPK_FAMILY_SIGNALING_CASCADES           |
| 4:114597918  | <i>CAMK2D</i>   | REACTOME_MAPK_FAMILY_SIGNALING_CASCADES           |
| 5:133558885  | <i>C5orf24</i>  | REACTOME_MAPK_FAMILY_SIGNALING_CASCADES           |
| 6:112137847  | <i>FYN</i>      | REACTOME_MAPK_FAMILY_SIGNALING_CASCADES           |
| 6:112151452  | <i>FYN</i>      | REACTOME_MAPK_FAMILY_SIGNALING_CASCADES           |
| 6:112175069  | <i>FYN</i>      | REACTOME_MAPK_FAMILY_SIGNALING_CASCADES           |
| 8:21565088   | <i>BIN3</i>     | REACTOME_MAPK_FAMILY_SIGNALING_CASCADES           |
| 8:21582921   | <i>BIN3</i>     | REACTOME_MAPK_FAMILY_SIGNALING_CASCADES           |
| 8:21665306   | <i>BIN3</i>     | REACTOME_MAPK_FAMILY_SIGNALING_CASCADES           |
| 8:21668901   | <i>BIN3</i>     | REACTOME_MAPK_FAMILY_SIGNALING_CASCADES           |
| 11:83219006  | <i>DLG2</i>     | REACTOME_MAPK_FAMILY_SIGNALING_CASCADES           |
| 11:83232915  | <i>DLG2</i>     | REACTOME_MAPK_FAMILY_SIGNALING_CASCADES           |
| 11:83282740  | <i>DLG2</i>     | REACTOME_MAPK_FAMILY_SIGNALING_CASCADES           |
| 11:83387273  | <i>DLG2</i>     | REACTOME_MAPK_FAMILY_SIGNALING_CASCADES           |

|              |                     |                                                              |
|--------------|---------------------|--------------------------------------------------------------|
| 11:83538733  | <i>DLG2</i>         | REACTOME_MAPK_FAMILY_SIGNALING_CASCADES                      |
| 11:83544472  | <i>DLG2</i>         | REACTOME_MAPK_FAMILY_SIGNALING_CASCADES                      |
| 11:83578152  | <i>DLG2</i>         | REACTOME_MAPK_FAMILY_SIGNALING_CASCADES                      |
| 11:83647657  | <i>DLG2</i>         | REACTOME_MAPK_FAMILY_SIGNALING_CASCADES                      |
| 11:83669903  | <i>DLG2</i>         | REACTOME_MAPK_FAMILY_SIGNALING_CASCADES                      |
| 11:83736246  | <i>DLG2</i>         | REACTOME_MAPK_FAMILY_SIGNALING_CASCADES                      |
| 11:83762918  | <i>DLG2</i>         | REACTOME_MAPK_FAMILY_SIGNALING_CASCADES                      |
| 11:83823752  | <i>DLG2</i>         | REACTOME_MAPK_FAMILY_SIGNALING_CASCADES                      |
| 11:83839992  | <i>DLG2</i>         | REACTOME_MAPK_FAMILY_SIGNALING_CASCADES                      |
| 11:84104763  | <i>DLG2</i>         | REACTOME_MAPK_FAMILY_SIGNALING_CASCADES                      |
| 11:84169039  | <i>DLG2</i>         | REACTOME_MAPK_FAMILY_SIGNALING_CASCADES                      |
| 11:84221628  | <i>DLG2</i>         | REACTOME_MAPK_FAMILY_SIGNALING_CASCADES                      |
| 11:84312008  | <i>DLG2</i>         | REACTOME_MAPK_FAMILY_SIGNALING_CASCADES                      |
| 11:84324361  | <i>DLG2</i>         | REACTOME_MAPK_FAMILY_SIGNALING_CASCADES                      |
| 11:84360346  | <i>DLG2</i>         | REACTOME_MAPK_FAMILY_SIGNALING_CASCADES                      |
| 11:84403409  | <i>DLG2</i>         | REACTOME_MAPK_FAMILY_SIGNALING_CASCADES                      |
| 17:7101771   | <i>V1NB1</i>        | REACTOME_MAPK_FAMILY_SIGNALING_CASCADES                      |
| 17:42454243  | <i>FAM171A2</i>     | REACTOME_MAPK_FAMILY_SIGNALING_CASCADES                      |
| 18:48228968  | <i>MEX3C</i>        | REACTOME_MAPK_FAMILY_SIGNALING_CASCADES                      |
| 5:133558885  | <i>C5orf24</i>      | REACTOME_MAPK_TARGETS_NUCLEAR_EVENTS_MEDIATED_BY_MAP_KINASES |
| 17:41845031  | <i>FAM171A2</i>     | REACTOME_MAPK_TARGETS_NUCLEAR_EVENTS_MEDIATED_BY_MAP_KINASES |
| 5:133558885  | <i>C5orf24</i>      | REACTOME_MASTL_FACILITATES_MITOTIC_PROGRESSION               |
| 1:156059276  | <i>GBAP1</i>        | REACTOME_MEIOSIS                                             |
| 6:31716436   | <i>HLA-DRB5</i>     | REACTOME_MEIOSIS                                             |
| 14:75495059  | <i>RPS6KL1</i>      | REACTOME_MEIOSIS                                             |
| 6:31716436   | <i>HLA-DRB5</i>     | REACTOME_MEIOTIC_RECOMBINATION                               |
| 14:75495059  | <i>RPS6KL1</i>      | REACTOME_MEIOTIC_RECOMBINATION                               |
| 1:156059276  | <i>GBAP1</i>        | REACTOME_MEIOTIC_SYNOPSIS                                    |
| 10:104591639 | <i>GBF1</i>         | REACTOME_METABOLIC_DISORDERS_OF_BIOLOGICAL_OXIDATION_ENZYMES |
| 1:226108200  | <i>ITPKB</i>        | REACTOME_METABOLISM_OF_AMINO_ACIDS_AND_DERIVATIVES           |
| 3:182760073  | <i>MCCC1</i>        | REACTOME_METABOLISM_OF_AMINO_ACIDS_AND_DERIVATIVES           |
| 4:17465704   | <i>LCORL</i>        | REACTOME_METABOLISM_OF_AMINO_ACIDS_AND_DERIVATIVES           |
| 4:17503839   | <i>LCORL</i>        | REACTOME_METABOLISM_OF_AMINO_ACIDS_AND_DERIVATIVES           |
| 11:134130174 | <i>IGSF9B</i>       | REACTOME_METABOLISM_OF_AMINO_ACIDS_AND_DERIVATIVES           |
| 12:133295501 | <i>FBRSL1</i>       | REACTOME_METABOLISM_OF_AMINO_ACIDS_AND_DERIVATIVES           |
| 14:37176333  | <i>MIPOL1</i>       | REACTOME_METABOLISM_OF_AMINO_ACIDS_AND_DERIVATIVES           |
| 14:37176342  | <i>MIPOL1</i>       | REACTOME_METABOLISM_OF_AMINO_ACIDS_AND_DERIVATIVES           |
| 14:37226055  | <i>MIPOL1</i>       | REACTOME_METABOLISM_OF_AMINO_ACIDS_AND_DERIVATIVES           |
| 14:37268679  | <i>MIPOL1</i>       | REACTOME_METABOLISM_OF_AMINO_ACIDS_AND_DERIVATIVES           |
| 14:37354184  | <i>MIPOL1</i>       | REACTOME_METABOLISM_OF_AMINO_ACIDS_AND_DERIVATIVES           |
| 14:37385108  | <i>MIPOL1</i>       | REACTOME_METABOLISM_OF_AMINO_ACIDS_AND_DERIVATIVES           |
| 14:37445399  | <i>MIPOL1</i>       | REACTOME_METABOLISM_OF_AMINO_ACIDS_AND_DERIVATIVES           |
| 14:37472311  | <i>MIPOL1</i>       | REACTOME_METABOLISM_OF_AMINO_ACIDS_AND_DERIVATIVES           |
| 2:168682052  | <i>STK39</i>        | REACTOME_METABOLISM_OF_CARBOHYDRATES                         |
| 5:133558885  | <i>C5orf24</i>      | REACTOME_METABOLISM_OF_CARBOHYDRATES                         |
| 6:71594785   | <i>RIMS1</i>        | REACTOME_METABOLISM_OF_CARBOHYDRATES                         |
| 7:65425894   | <i>GS1-124K5.11</i> | REACTOME_METABOLISM_OF_CARBOHYDRATES                         |
| 11:134255325 | <i>IGSF9B</i>       | REACTOME_METABOLISM_OF_CARBOHYDRATES                         |
| 13:97182312  | <i>MBNL2</i>        | REACTOME_METABOLISM_OF_CARBOHYDRATES                         |
| 13:97200682  | <i>MBNL2</i>        | REACTOME_METABOLISM_OF_CARBOHYDRATES                         |
| 13:97278310  | <i>MBNL2</i>        | REACTOME_METABOLISM_OF_CARBOHYDRATES                         |
| 13:97441830  | <i>MBNL2</i>        | REACTOME_METABOLISM_OF_CARBOHYDRATES                         |
| 17:41056283  | <i>RETREG3</i>      | REACTOME_METABOLISM_OF_CARBOHYDRATES                         |

|              |                 |                                             |
|--------------|-----------------|---------------------------------------------|
| 14:55348869  | <i>GCH1</i>     | REACTOME_METABOLISM_OF_COFACTORS            |
| 16:19085298  | <i>SYT17</i>    | REACTOME_METABOLISM_OF_COFACTORS            |
| 16:19090194  | <i>SYT17</i>    | REACTOME_METABOLISM_OF_COFACTORS            |
| 2:170012307  | <i>STK39</i>    | REACTOME_METABOLISM_OF_FAT_SOLUBLE_VITAMINS |
| 2:170028024  | <i>STK39</i>    | REACTOME_METABOLISM_OF_FAT_SOLUBLE_VITAMINS |
| 2:170066424  | <i>STK39</i>    | REACTOME_METABOLISM_OF_FAT_SOLUBLE_VITAMINS |
| 1:155205634  | <i>GBAP1</i>    | REACTOME_METABOLISM_OF_LIPIDS               |
| 2:96858914   | <i>KCNIP3</i>   | REACTOME_METABOLISM_OF_LIPIDS               |
| 2:101439596  | <i>MAP4K4</i>   | REACTOME_METABOLISM_OF_LIPIDS               |
| 2:101464631  | <i>MAP4K4</i>   | REACTOME_METABOLISM_OF_LIPIDS               |
| 2:101547064  | <i>MAP4K4</i>   | REACTOME_METABOLISM_OF_LIPIDS               |
| 2:101550181  | <i>MAP4K4</i>   | REACTOME_METABOLISM_OF_LIPIDS               |
| 2:101578010  | <i>MAP4K4</i>   | REACTOME_METABOLISM_OF_LIPIDS               |
| 2:101603812  | <i>MAP4K4</i>   | REACTOME_METABOLISM_OF_LIPIDS               |
| 2:169389091  | <i>STK39</i>    | REACTOME_METABOLISM_OF_LIPIDS               |
| 2:169518974  | <i>STK39</i>    | REACTOME_METABOLISM_OF_LIPIDS               |
| 2:169519063  | <i>STK39</i>    | REACTOME_METABOLISM_OF_LIPIDS               |
| 2:169520026  | <i>STK39</i>    | REACTOME_METABOLISM_OF_LIPIDS               |
| 2:169550660  | <i>STK39</i>    | REACTOME_METABOLISM_OF_LIPIDS               |
| 2:169561027  | <i>STK39</i>    | REACTOME_METABOLISM_OF_LIPIDS               |
| 2:169597744  | <i>STK39</i>    | REACTOME_METABOLISM_OF_LIPIDS               |
| 2:170012307  | <i>STK39</i>    | REACTOME_METABOLISM_OF_LIPIDS               |
| 2:170028024  | <i>STK39</i>    | REACTOME_METABOLISM_OF_LIPIDS               |
| 2:170066424  | <i>STK39</i>    | REACTOME_METABOLISM_OF_LIPIDS               |
| 3:160668220  | <i>SPTSSB</i>   | REACTOME_METABOLISM_OF_LIPIDS               |
| 3:160817877  | <i>SPTSSB</i>   | REACTOME_METABOLISM_OF_LIPIDS               |
| 3:161068566  | <i>SPTSSB</i>   | REACTOME_METABOLISM_OF_LIPIDS               |
| 3:161075189  | <i>SPTSSB</i>   | REACTOME_METABOLISM_OF_LIPIDS               |
| 4:17622910   | <i>LCORL</i>    | REACTOME_METABOLISM_OF_LIPIDS               |
| 4:114899005  | <i>CAMK2D</i>   | REACTOME_METABOLISM_OF_LIPIDS               |
| 4:169806784  | <i>CLCN3</i>    | REACTOME_METABOLISM_OF_LIPIDS               |
| 5:60053220   | <i>ELOVL7</i>   | REACTOME_METABOLISM_OF_LIPIDS               |
| 5:60085489   | <i>ELOVL7</i>   | REACTOME_METABOLISM_OF_LIPIDS               |
| 5:60093890   | <i>ELOVL7</i>   | REACTOME_METABOLISM_OF_LIPIDS               |
| 6:31846234   | <i>HLA-DRB5</i> | REACTOME_METABOLISM_OF_LIPIDS               |
| 6:32126002   | <i>HLA-DRB5</i> | REACTOME_METABOLISM_OF_LIPIDS               |
| 8:11679472   | <i>CTSB</i>     | REACTOME_METABOLISM_OF_LIPIDS               |
| 8:17161374   | <i>FGF20</i>    | REACTOME_METABOLISM_OF_LIPIDS               |
| 8:17176046   | <i>FGF20</i>    | REACTOME_METABOLISM_OF_LIPIDS               |
| 8:17243260   | <i>FGF20</i>    | REACTOME_METABOLISM_OF_LIPIDS               |
| 8:17260937   | <i>FGF20</i>    | REACTOME_METABOLISM_OF_LIPIDS               |
| 10:104591639 | <i>GBF1</i>     | REACTOME_METABOLISM_OF_LIPIDS               |
| 10:121505277 | <i>INPP5F</i>   | REACTOME_METABOLISM_OF_LIPIDS               |
| 10:121538407 | <i>INPP5F</i>   | REACTOME_METABOLISM_OF_LIPIDS               |
| 10:121560563 | <i>INPP5F</i>   | REACTOME_METABOLISM_OF_LIPIDS               |
| 12:123561638 | <i>HIP1R</i>    | REACTOME_METABOLISM_OF_LIPIDS               |
| 12:123585705 | <i>HIP1R</i>    | REACTOME_METABOLISM_OF_LIPIDS               |
| 14:88372366  | <i>GALC</i>     | REACTOME_METABOLISM_OF_LIPIDS               |
| 14:88393900  | <i>GALC</i>     | REACTOME_METABOLISM_OF_LIPIDS               |
| 14:88415750  | <i>GALC</i>     | REACTOME_METABOLISM_OF_LIPIDS               |
| 14:88443553  | <i>GALC</i>     | REACTOME_METABOLISM_OF_LIPIDS               |
| 15:61016235  | <i>VPS13C</i>   | REACTOME_METABOLISM_OF_LIPIDS               |
| 15:61065568  | <i>VPS13C</i>   | REACTOME_METABOLISM_OF_LIPIDS               |

|              |              |                                                                    |
|--------------|--------------|--------------------------------------------------------------------|
| 15:61094298  | VPS13C       | REACTOME_METABOLISM_OF_LIPIDS                                      |
| 15:61140736  | VPS13C       | REACTOME_METABOLISM_OF_LIPIDS                                      |
| 15:61142062  | VPS13C       | REACTOME_METABOLISM_OF_LIPIDS                                      |
| 15:61162571  | VPS13C       | REACTOME_METABOLISM_OF_LIPIDS                                      |
| 15:61191617  | VPS13C       | REACTOME_METABOLISM_OF_LIPIDS                                      |
| 15:61195427  | VPS13C       | REACTOME_METABOLISM_OF_LIPIDS                                      |
| 15:61221682  | VPS13C       | REACTOME_METABOLISM_OF_LIPIDS                                      |
| 15:61298486  | VPS13C       | REACTOME_METABOLISM_OF_LIPIDS                                      |
| 15:61375480  | VPS13C       | REACTOME_METABOLISM_OF_LIPIDS                                      |
| 15:61434581  | VPS13C       | REACTOME_METABOLISM_OF_LIPIDS                                      |
| 15:61467078  | VPS13C       | REACTOME_METABOLISM_OF_LIPIDS                                      |
| 15:61470808  | VPS13C       | REACTOME_METABOLISM_OF_LIPIDS                                      |
| 15:61500263  | VPS13C       | REACTOME_METABOLISM_OF_LIPIDS                                      |
| 16:29871730  | CD19         | REACTOME_METABOLISM_OF_LIPIDS                                      |
| 16:30999462  | SETD1A       | REACTOME_METABOLISM_OF_LIPIDS                                      |
| 17:6370241   | V1NB1        | REACTOME_METABOLISM_OF_LIPIDS                                      |
| 17:6406333   | V1NB1        | REACTOME_METABOLISM_OF_LIPIDS                                      |
| 17:7983799   | V1NB1        | REACTOME_METABOLISM_OF_LIPIDS                                      |
| 17:8019125   | V1NB1        | REACTOME_METABOLISM_OF_LIPIDS                                      |
| 17:60124582  | BRIP1        | REACTOME_METABOLISM_OF_LIPIDS                                      |
| 20:5575860   | CRLS1        | REACTOME_METABOLISM_OF_LIPIDS                                      |
| 20:6011934   | CRLS1        | REACTOME_METABOLISM_OF_LIPIDS                                      |
| 2:169659620  | STK39        | REACTOME_METABOLISM_OF_NITRIC_OXIDE_ENOS_ACTIVATION_AND_REGULATION |
| 10:104847713 | GBF1         | REACTOME_METABOLISM_OF_NUCLEOTIDES                                 |
| 10:104861736 | GBF1         | REACTOME_METABOLISM_OF_NUCLEOTIDES                                 |
| 10:104926485 | GBF1         | REACTOME_METABOLISM_OF_NUCLEOTIDES                                 |
| 10:104929716 | GBF1         | REACTOME_METABOLISM_OF_NUCLEOTIDES                                 |
| 11:10392432  | RNF141       | REACTOME_METABOLISM_OF_NUCLEOTIDES                                 |
| 11:10429998  | RNF141       | REACTOME_METABOLISM_OF_NUCLEOTIDES                                 |
| 11:10458098  | RNF141       | REACTOME_METABOLISM_OF_NUCLEOTIDES                                 |
| 11:10471738  | RNF141       | REACTOME_METABOLISM_OF_NUCLEOTIDES                                 |
| 11:10487997  | RNF141       | REACTOME_METABOLISM_OF_NUCLEOTIDES                                 |
| 11:10494132  | RNF141       | REACTOME_METABOLISM_OF_NUCLEOTIDES                                 |
| 14:74477206  | RPS6KL1      | REACTOME_METABOLISM_OF_NUCLEOTIDES                                 |
| 16:30438930  | SETD1A       | REACTOME_METABOLISM_OF_NUCLEOTIDES                                 |
| 17:76177567  | DNAH17       | REACTOME_METABOLISM_OF_NUCLEOTIDES                                 |
| 5:133558885  | C5orf24      | REACTOME_METABOLISM_OF_RNA                                         |
| 5:134132269  | C5orf24      | REACTOME_METABOLISM_OF_RNA                                         |
| 6:30628082   | TRIM40       | REACTOME_METABOLISM_OF_RNA                                         |
| 6:30631063   | TRIM40       | REACTOME_METABOLISM_OF_RNA                                         |
| 6:30639369   | TRIM40       | REACTOME_METABOLISM_OF_RNA                                         |
| 7:23382980   | GPNMB        | REACTOME_METABOLISM_OF_RNA                                         |
| 7:23385251   | GPNMB        | REACTOME_METABOLISM_OF_RNA                                         |
| 7:23387110   | GPNMB        | REACTOME_METABOLISM_OF_RNA                                         |
| 7:23446436   | GPNMB        | REACTOME_METABOLISM_OF_RNA                                         |
| 7:23481701   | GPNMB        | REACTOME_METABOLISM_OF_RNA                                         |
| 7:23495961   | GPNMB        | REACTOME_METABOLISM_OF_RNA                                         |
| 7:66487445   | GS1-124K5.11 | REACTOME_METABOLISM_OF_RNA                                         |
| 7:66543959   | GS1-124K5.11 | REACTOME_METABOLISM_OF_RNA                                         |
| 7:66638082   | GS1-124K5.11 | REACTOME_METABOLISM_OF_RNA                                         |
| 9:33467577   | UBAP2        | REACTOME_METABOLISM_OF_RNA                                         |
| 17:7479140   | V1NB1        | REACTOME_METABOLISM_OF_RNA                                         |
| 17:7480325   | V1NB1        | REACTOME_METABOLISM_OF_RNA                                         |

|              |                |                                                             |
|--------------|----------------|-------------------------------------------------------------|
| 17:42929985  | <i>CRHR1_2</i> | REACTOME_METABOLISM_OF_RNA                                  |
| 10:104591639 | <i>GBF1</i>    | REACTOME_METABOLISM_OF_STEROID_HORMONES                     |
| 2:170012307  | <i>STK39</i>   | REACTOME_METABOLISM_OF_STEROIDS                             |
| 2:170028024  | <i>STK39</i>   | REACTOME_METABOLISM_OF_STEROIDS                             |
| 2:170066424  | <i>STK39</i>   | REACTOME_METABOLISM_OF_STEROIDS                             |
| 8:11679472   | <i>CTSB</i>    | REACTOME_METABOLISM_OF_STEROIDS                             |
| 10:104591639 | <i>GBF1</i>    | REACTOME_METABOLISM_OF_STEROIDS                             |
| 16:30999462  | <i>SETD1A</i>  | REACTOME_METABOLISM_OF_STEROIDS                             |
| 2:170012307  | <i>STK39</i>   | REACTOME_METABOLISM_OF_VITAMINS_AND_COFACTORS               |
| 2:170028024  | <i>STK39</i>   | REACTOME_METABOLISM_OF_VITAMINS_AND_COFACTORS               |
| 2:170066424  | <i>STK39</i>   | REACTOME_METABOLISM_OF_VITAMINS_AND_COFACTORS               |
| 3:122259640  | <i>KPNA1</i>   | REACTOME_METABOLISM_OF_VITAMINS_AND_COFACTORS               |
| 3:182760073  | <i>MCCC1</i>   | REACTOME_METABOLISM_OF_VITAMINS_AND_COFACTORS               |
| 4:15709252   | <i>BST1</i>    | REACTOME_METABOLISM_OF_VITAMINS_AND_COFACTORS               |
| 4:15713608   | <i>BST1</i>    | REACTOME_METABOLISM_OF_VITAMINS_AND_COFACTORS               |
| 4:15724372   | <i>BST1</i>    | REACTOME_METABOLISM_OF_VITAMINS_AND_COFACTORS               |
| 4:15737882   | <i>BST1</i>    | REACTOME_METABOLISM_OF_VITAMINS_AND_COFACTORS               |
| 4:15789288   | <i>BST1</i>    | REACTOME_METABOLISM_OF_VITAMINS_AND_COFACTORS               |
| 4:15816670   | <i>BST1</i>    | REACTOME_METABOLISM_OF_VITAMINS_AND_COFACTORS               |
| 4:15829612   | <i>BST1</i>    | REACTOME_METABOLISM_OF_VITAMINS_AND_COFACTORS               |
| 5:102889674  | <i>PAM</i>     | REACTOME_METABOLISM_OF_VITAMINS_AND_COFACTORS               |
| 6:133025715  | <i>RPS12</i>   | REACTOME_METABOLISM_OF_VITAMINS_AND_COFACTORS               |
| 6:133028870  | <i>RPS12</i>   | REACTOME_METABOLISM_OF_VITAMINS_AND_COFACTORS               |
| 6:133075265  | <i>RPS12</i>   | REACTOME_METABOLISM_OF_VITAMINS_AND_COFACTORS               |
| 9:33791164   | <i>UBAP2</i>   | REACTOME_METABOLISM_OF_VITAMINS_AND_COFACTORS               |
| 14:55348869  | <i>GCH1</i>    | REACTOME_METABOLISM_OF_VITAMINS_AND_COFACTORS               |
| 14:74764925  | <i>RPS6KL1</i> | REACTOME_METABOLISM_OF_VITAMINS_AND_COFACTORS               |
| 16:19085298  | <i>SYT17</i>   | REACTOME_METABOLISM_OF_VITAMINS_AND_COFACTORS               |
| 16:19090194  | <i>SYT17</i>   | REACTOME_METABOLISM_OF_VITAMINS_AND_COFACTORS               |
| 21:38136802  | <i>DYRK1A</i>  | REACTOME_METABOLISM_OF_VITAMINS_AND_COFACTORS               |
| 21:38168749  | <i>DYRK1A</i>  | REACTOME_METABOLISM_OF_VITAMINS_AND_COFACTORS               |
| 21:38210057  | <i>DYRK1A</i>  | REACTOME_METABOLISM_OF_VITAMINS_AND_COFACTORS               |
| 21:38238679  | <i>DYRK1A</i>  | REACTOME_METABOLISM_OF_VITAMINS_AND_COFACTORS               |
| 21:38328886  | <i>DYRK1A</i>  | REACTOME_METABOLISM_OF_VITAMINS_AND_COFACTORS               |
| 21:38332144  | <i>DYRK1A</i>  | REACTOME_METABOLISM_OF_VITAMINS_AND_COFACTORS               |
| 21:38356061  | <i>DYRK1A</i>  | REACTOME_METABOLISM_OF_VITAMINS_AND_COFACTORS               |
| 3:122259640  | <i>KPNA1</i>   | REACTOME_METABOLISM_OF_WATER_SOLUBLE_VITAMINS_AND_COFACTORS |
| 3:182760073  | <i>MCCC1</i>   | REACTOME_METABOLISM_OF_WATER_SOLUBLE_VITAMINS_AND_COFACTORS |
| 4:15709252   | <i>BST1</i>    | REACTOME_METABOLISM_OF_WATER_SOLUBLE_VITAMINS_AND_COFACTORS |
| 4:15713608   | <i>BST1</i>    | REACTOME_METABOLISM_OF_WATER_SOLUBLE_VITAMINS_AND_COFACTORS |
| 4:15724372   | <i>BST1</i>    | REACTOME_METABOLISM_OF_WATER_SOLUBLE_VITAMINS_AND_COFACTORS |
| 4:15737882   | <i>BST1</i>    | REACTOME_METABOLISM_OF_WATER_SOLUBLE_VITAMINS_AND_COFACTORS |
| 4:15789288   | <i>BST1</i>    | REACTOME_METABOLISM_OF_WATER_SOLUBLE_VITAMINS_AND_COFACTORS |
| 4:15816670   | <i>BST1</i>    | REACTOME_METABOLISM_OF_WATER_SOLUBLE_VITAMINS_AND_COFACTORS |
| 4:15829612   | <i>BST1</i>    | REACTOME_METABOLISM_OF_WATER_SOLUBLE_VITAMINS_AND_COFACTORS |
| 5:102889674  | <i>PAM</i>     | REACTOME_METABOLISM_OF_WATER_SOLUBLE_VITAMINS_AND_COFACTORS |
| 6:133025715  | <i>RPS12</i>   | REACTOME_METABOLISM_OF_WATER_SOLUBLE_VITAMINS_AND_COFACTORS |
| 6:133028870  | <i>RPS12</i>   | REACTOME_METABOLISM_OF_WATER_SOLUBLE_VITAMINS_AND_COFACTORS |
| 6:133075265  | <i>RPS12</i>   | REACTOME_METABOLISM_OF_WATER_SOLUBLE_VITAMINS_AND_COFACTORS |
| 9:33791164   | <i>UBAP2</i>   | REACTOME_METABOLISM_OF_WATER_SOLUBLE_VITAMINS_AND_COFACTORS |
| 14:74764925  | <i>RPS6KL1</i> | REACTOME_METABOLISM_OF_WATER_SOLUBLE_VITAMINS_AND_COFACTORS |
| 21:38136802  | <i>DYRK1A</i>  | REACTOME_METABOLISM_OF_WATER_SOLUBLE_VITAMINS_AND_COFACTORS |
| 21:38168749  | <i>DYRK1A</i>  | REACTOME_METABOLISM_OF_WATER_SOLUBLE_VITAMINS_AND_COFACTORS |

|              |                 |                                                             |
|--------------|-----------------|-------------------------------------------------------------|
| 21:38210057  | <i>DYRK1A</i>   | REACTOME_METABOLISM_OF_WATER_SOLUBLE_VITAMINS_AND_COFACTORS |
| 21:38238679  | <i>DYRK1A</i>   | REACTOME_METABOLISM_OF_WATER_SOLUBLE_VITAMINS_AND_COFACTORS |
| 21:38328886  | <i>DYRK1A</i>   | REACTOME_METABOLISM_OF_WATER_SOLUBLE_VITAMINS_AND_COFACTORS |
| 21:38332144  | <i>DYRK1A</i>   | REACTOME_METABOLISM_OF_WATER_SOLUBLE_VITAMINS_AND_COFACTORS |
| 21:38356061  | <i>DYRK1A</i>   | REACTOME_METABOLISM_OF_WATER_SOLUBLE_VITAMINS_AND_COFACTORS |
| 3:49162284   | <i>IP6K2</i>    | REACTOME_MET_ACTIVATES_PTK2_SIGNALING                       |
| 3:49162583   | <i>IP6K2</i>    | REACTOME_MET_ACTIVATES_PTK2_SIGNALING                       |
| 6:33153528   | <i>HLA-DRB5</i> | REACTOME_MET_ACTIVATES_PTK2_SIGNALING                       |
| 6:112494762  | <i>FYN</i>      | REACTOME_MET_ACTIVATES_PTK2_SIGNALING                       |
| 6:112531401  | <i>FYN</i>      | REACTOME_MET_ACTIVATES_PTK2_SIGNALING                       |
| 6:112561154  | <i>FYN</i>      | REACTOME_MET_ACTIVATES_PTK2_SIGNALING                       |
| 6:112561430  | <i>FYN</i>      | REACTOME_MET_ACTIVATES_PTK2_SIGNALING                       |
| 10:104635620 | <i>GBF1</i>     | REACTOME_METHYLATION                                        |
| 3:49162284   | <i>IP6K2</i>    | REACTOME_MET_PROMOTES_CELL_MOTILITY                         |
| 3:49162583   | <i>IP6K2</i>    | REACTOME_MET_PROMOTES_CELL_MOTILITY                         |
| 6:33153528   | <i>HLA-DRB5</i> | REACTOME_MET_PROMOTES_CELL_MOTILITY                         |
| 6:112494762  | <i>FYN</i>      | REACTOME_MET_PROMOTES_CELL_MOTILITY                         |
| 6:112531401  | <i>FYN</i>      | REACTOME_MET_PROMOTES_CELL_MOTILITY                         |
| 6:112561154  | <i>FYN</i>      | REACTOME_MET_PROMOTES_CELL_MOTILITY                         |
| 6:112561430  | <i>FYN</i>      | REACTOME_MET_PROMOTES_CELL_MOTILITY                         |
| 1:171837985  | <i>VAMP4</i>    | REACTOME_MHC_CLASS_II_ANTIGEN_PRESENTATION                  |
| 1:171945488  | <i>VAMP4</i>    | REACTOME_MHC_CLASS_II_ANTIGEN_PRESENTATION                  |
| 1:172137119  | <i>VAMP4</i>    | REACTOME_MHC_CLASS_II_ANTIGEN_PRESENTATION                  |
| 1:172386261  | <i>VAMP4</i>    | REACTOME_MHC_CLASS_II_ANTIGEN_PRESENTATION                  |
| 6:32602372   | <i>HLA-DRB5</i> | REACTOME_MHC_CLASS_II_ANTIGEN_PRESENTATION                  |
| 6:32930679   | <i>HLA-DRB5</i> | REACTOME_MHC_CLASS_II_ANTIGEN_PRESENTATION                  |
| 6:32934409   | <i>HLA-DRB5</i> | REACTOME_MHC_CLASS_II_ANTIGEN_PRESENTATION                  |
| 6:32973303   | <i>HLA-DRB5</i> | REACTOME_MHC_CLASS_II_ANTIGEN_PRESENTATION                  |
| 6:32974268   | <i>HLA-DRB5</i> | REACTOME_MHC_CLASS_II_ANTIGEN_PRESENTATION                  |
| 8:11712443   | <i>CTSB</i>     | REACTOME_MHC_CLASS_II_ANTIGEN_PRESENTATION                  |
| 9:17579690   | <i>SH3GL2_2</i> | REACTOME_MHC_CLASS_II_ANTIGEN_PRESENTATION                  |
| 9:17587160   | <i>SH3GL2_2</i> | REACTOME_MHC_CLASS_II_ANTIGEN_PRESENTATION                  |
| 9:17609302   | <i>SH3GL2_2</i> | REACTOME_MHC_CLASS_II_ANTIGEN_PRESENTATION                  |
| 9:17626762   | <i>SH3GL2_2</i> | REACTOME_MHC_CLASS_II_ANTIGEN_PRESENTATION                  |
| 9:17627444   | <i>SH3GL2_2</i> | REACTOME_MHC_CLASS_II_ANTIGEN_PRESENTATION                  |
| 9:17642664   | <i>SH3GL2_2</i> | REACTOME_MHC_CLASS_II_ANTIGEN_PRESENTATION                  |
| 9:17710876   | <i>SH3GL2_2</i> | REACTOME_MHC_CLASS_II_ANTIGEN_PRESENTATION                  |
| 9:17732590   | <i>SH3GL2_2</i> | REACTOME_MHC_CLASS_II_ANTIGEN_PRESENTATION                  |
| 9:17737514   | <i>SH3GL2_2</i> | REACTOME_MHC_CLASS_II_ANTIGEN_PRESENTATION                  |
| 9:17758945   | <i>SH3GL2_2</i> | REACTOME_MHC_CLASS_II_ANTIGEN_PRESENTATION                  |
| 10:104258303 | <i>GBF1</i>     | REACTOME_MHC_CLASS_II_ANTIGEN_PRESENTATION                  |
| 8:17125768   | <i>FGF20</i>    | REACTOME_MICROAUTOPHAGY                                     |
| 1:155181232  | <i>GBAP1</i>    | REACTOME_MITOCHONDRIAL_BIOGENESIS                           |
| 8:16929685   | <i>FGF20</i>    | REACTOME_MITOCHONDRIAL_CALCIIUM_ION_TRANSPORT               |
| 8:16967392   | <i>FGF20</i>    | REACTOME_MITOCHONDRIAL_CALCIIUM_ION_TRANSPORT               |
| 8:16971257   | <i>FGF20</i>    | REACTOME_MITOCHONDRIAL_CALCIIUM_ION_TRANSPORT               |
| 8:23415524   | <i>BIN3</i>     | REACTOME_MITOCHONDRIAL_IRON_SULFUR_CLUSTER_BIOGENESIS       |
| 1:155181232  | <i>GBAP1</i>    | REACTOME_MITOCHONDRIAL_PROTEIN_IMPORT                       |
| 1:155698425  | <i>GBAP1</i>    | REACTOME_MITOCHONDRIAL_TRANSLATION                          |
| 12:133295501 | <i>FBRSL1</i>   | REACTOME_MITOPHAGY                                          |
| 1:226497419  | <i>ITPKB</i>    | REACTOME_MITOTIC_G1_G1_S_PHASES                             |
| 3:48199695   | <i>IP6K2</i>    | REACTOME_MITOTIC_G1_G1_S_PHASES                             |
| 3:48214438   | <i>IP6K2</i>    | REACTOME_MITOTIC_G1_G1_S_PHASES                             |

|              |                     |                                         |
|--------------|---------------------|-----------------------------------------|
| 5:133558885  | <i>C5orf24</i>      | REACTOME_MITOTIC_G1_G1_S_PHASES         |
| 12:133206648 | <i>FBRSL1</i>       | REACTOME_MITOTIC_G1_G1_S_PHASES         |
| 12:133223685 | <i>FBRSL1</i>       | REACTOME_MITOTIC_G1_G1_S_PHASES         |
| 14:74640180  | <i>RPS6KL1</i>      | REACTOME_MITOTIC_G1_G1_S_PHASES         |
| 17:76177567  | <i>DNAH17</i>       | REACTOME_MITOTIC_G1_G1_S_PHASES         |
| 20:5934513   | <i>CRLS1</i>        | REACTOME_MITOTIC_G1_G1_S_PHASES         |
| 20:5935522   | <i>CRLS1</i>        | REACTOME_MITOTIC_G1_G1_S_PHASES         |
| 20:5968737   | <i>CRLS1</i>        | REACTOME_MITOTIC_G1_G1_S_PHASES         |
| 20:5968964   | <i>CRLS1</i>        | REACTOME_MITOTIC_G1_G1_S_PHASES         |
| 21:38740824  | <i>DYRK1A</i>       | REACTOME_MITOTIC_G1_G1_S_PHASES         |
| 21:38753354  | <i>DYRK1A</i>       | REACTOME_MITOTIC_G1_G1_S_PHASES         |
| 21:38770530  | <i>DYRK1A</i>       | REACTOME_MITOTIC_G1_G1_S_PHASES         |
| 21:38783614  | <i>DYRK1A</i>       | REACTOME_MITOTIC_G1_G1_S_PHASES         |
| 21:38814867  | <i>DYRK1A</i>       | REACTOME_MITOTIC_G1_G1_S_PHASES         |
| 1:226497419  | <i>ITPKB</i>        | REACTOME_MITOTIC_G2_G2_M_PHASES         |
| 3:48199695   | <i>IP6K2</i>        | REACTOME_MITOTIC_G2_G2_M_PHASES         |
| 3:48214438   | <i>IP6K2</i>        | REACTOME_MITOTIC_G2_G2_M_PHASES         |
| 5:133558885  | <i>C5orf24</i>      | REACTOME_MITOTIC_G2_G2_M_PHASES         |
| 10:103185542 | <i>GBF1</i>         | REACTOME_MITOTIC_G2_G2_M_PHASES         |
| 10:103305087 | <i>GBF1</i>         | REACTOME_MITOTIC_G2_G2_M_PHASES         |
| 10:103308244 | <i>GBF1</i>         | REACTOME_MITOTIC_G2_G2_M_PHASES         |
| 10:104258303 | <i>GBF1</i>         | REACTOME_MITOTIC_G2_G2_M_PHASES         |
| 14:74640180  | <i>RPS6KL1</i>      | REACTOME_MITOTIC_G2_G2_M_PHASES         |
| 16:19562008  | <i>SYT17</i>        | REACTOME_MITOTIC_G2_G2_M_PHASES         |
| 17:7578671   | <i>V1NB1</i>        | REACTOME_MITOTIC_G2_G2_M_PHASES         |
| 17:40818584  | <i>RETREG3</i>      | REACTOME_MITOTIC_G2_G2_M_PHASES         |
| 1:156059276  | <i>GBAP1</i>        | REACTOME_MITOTIC_METAPHASE_AND_ANAPHASE |
| 2:169747216  | <i>STK39</i>        | REACTOME_MITOTIC_METAPHASE_AND_ANAPHASE |
| 5:133558885  | <i>C5orf24</i>      | REACTOME_MITOTIC_METAPHASE_AND_ANAPHASE |
| 12:122816734 | <i>HIP1R</i>        | REACTOME_MITOTIC_METAPHASE_AND_ANAPHASE |
| 12:122817580 | <i>HIP1R</i>        | REACTOME_MITOTIC_METAPHASE_AND_ANAPHASE |
| 12:122853197 | <i>HIP1R</i>        | REACTOME_MITOTIC_METAPHASE_AND_ANAPHASE |
| 12:123057792 | <i>HIP1R</i>        | REACTOME_MITOTIC_METAPHASE_AND_ANAPHASE |
| 12:123110365 | <i>HIP1R</i>        | REACTOME_MITOTIC_METAPHASE_AND_ANAPHASE |
| 12:123110785 | <i>HIP1R</i>        | REACTOME_MITOTIC_METAPHASE_AND_ANAPHASE |
| 17:45215865  | <i>WNT3</i>         | REACTOME_MITOTIC_METAPHASE_AND_ANAPHASE |
| 17:45244822  | <i>WNT3</i>         | REACTOME_MITOTIC_METAPHASE_AND_ANAPHASE |
| 2:169747216  | <i>STK39</i>        | REACTOME_MITOTIC_PROMETAPHASE           |
| 5:133558885  | <i>C5orf24</i>      | REACTOME_MITOTIC_PROMETAPHASE           |
| 10:104258303 | <i>GBF1</i>         | REACTOME_MITOTIC_PROMETAPHASE           |
| 12:122816734 | <i>HIP1R</i>        | REACTOME_MITOTIC_PROMETAPHASE           |
| 12:122817580 | <i>HIP1R</i>        | REACTOME_MITOTIC_PROMETAPHASE           |
| 12:122853197 | <i>HIP1R</i>        | REACTOME_MITOTIC_PROMETAPHASE           |
| 12:123057792 | <i>HIP1R</i>        | REACTOME_MITOTIC_PROMETAPHASE           |
| 12:123110365 | <i>HIP1R</i>        | REACTOME_MITOTIC_PROMETAPHASE           |
| 12:123110785 | <i>HIP1R</i>        | REACTOME_MITOTIC_PROMETAPHASE           |
| 16:19562008  | <i>SYT17</i>        | REACTOME_MITOTIC_PROMETAPHASE           |
| 17:40818584  | <i>RETREG3</i>      | REACTOME_MITOTIC_PROMETAPHASE           |
| 1:156059276  | <i>GBAP1</i>        | REACTOME_MITOTIC_PROPHASE               |
| 4:76695927   | <i>FAM47E-STBD1</i> | REACTOME_MITOTIC_PROPHASE               |
| 5:133558885  | <i>C5orf24</i>      | REACTOME_MITOTIC_PROPHASE               |
| 2:169747216  | <i>STK39</i>        | REACTOME_MITOTIC_SPINDLE_CHECKPOINT     |
| 5:133558885  | <i>C5orf24</i>      | REACTOME_MITOTIC_SPINDLE_CHECKPOINT     |

|              |                     |                                                   |
|--------------|---------------------|---------------------------------------------------|
| 12:122816734 | <i>HIP1R</i>        | REACTOME_MITOTIC_SPINDLE_CHECKPOINT               |
| 12:122817580 | <i>HIP1R</i>        | REACTOME_MITOTIC_SPINDLE_CHECKPOINT               |
| 12:122853197 | <i>HIP1R</i>        | REACTOME_MITOTIC_SPINDLE_CHECKPOINT               |
| 12:123057792 | <i>HIP1R</i>        | REACTOME_MITOTIC_SPINDLE_CHECKPOINT               |
| 12:123110365 | <i>HIP1R</i>        | REACTOME_MITOTIC_SPINDLE_CHECKPOINT               |
| 12:123110785 | <i>HIP1R</i>        | REACTOME_MITOTIC_SPINDLE_CHECKPOINT               |
| 17:45215865  | <i>WNT3</i>         | REACTOME_MITOTIC_SPINDLE_CHECKPOINT               |
| 17:45244822  | <i>WNT3</i>         | REACTOME_MITOTIC_SPINDLE_CHECKPOINT               |
| 10:15562608  | <i>ITGA8</i>        | REACTOME_MOLECULES_ASSOCIATED_WITH_ELASTIC_FIBRES |
| 10:15569598  | <i>ITGA8</i>        | REACTOME_MOLECULES_ASSOCIATED_WITH_ELASTIC_FIBRES |
| 10:15652368  | <i>ITGA8</i>        | REACTOME_MOLECULES_ASSOCIATED_WITH_ELASTIC_FIBRES |
| 14:75057014  | <i>RPS6KL1</i>      | REACTOME_MOLECULES_ASSOCIATED_WITH_ELASTIC_FIBRES |
| 1:156059276  | <i>GBAP1</i>        | REACTOME_M_PHASE                                  |
| 2:169747216  | <i>STK39</i>        | REACTOME_M_PHASE                                  |
| 4:76695927   | <i>FAM47E-STBD1</i> | REACTOME_M_PHASE                                  |
| 5:133558885  | <i>C5orf24</i>      | REACTOME_M_PHASE                                  |
| 10:104258303 | <i>GBF1</i>         | REACTOME_M_PHASE                                  |
| 12:122816734 | <i>HIP1R</i>        | REACTOME_M_PHASE                                  |
| 12:122817580 | <i>HIP1R</i>        | REACTOME_M_PHASE                                  |
| 12:122853197 | <i>HIP1R</i>        | REACTOME_M_PHASE                                  |
| 12:123057792 | <i>HIP1R</i>        | REACTOME_M_PHASE                                  |
| 12:123110365 | <i>HIP1R</i>        | REACTOME_M_PHASE                                  |
| 12:123110785 | <i>HIP1R</i>        | REACTOME_M_PHASE                                  |
| 16:19562008  | <i>SYT17</i>        | REACTOME_M_PHASE                                  |
| 17:40818584  | <i>RETREG3</i>      | REACTOME_M_PHASE                                  |
| 17:45215865  | <i>WNT3</i>         | REACTOME_M_PHASE                                  |
| 17:45244822  | <i>WNT3</i>         | REACTOME_M_PHASE                                  |
| 17:42929985  | <i>CRHR1_2</i>      | REACTOME_MRNA_SPLICING_MINOR_PATHWAY              |
| 5:134132269  | <i>C5orf24</i>      | REACTOME_MRNA_SPLICING                            |
| 6:30628082   | <i>TRIM40</i>       | REACTOME_MRNA_SPLICING                            |
| 6:30631063   | <i>TRIM40</i>       | REACTOME_MRNA_SPLICING                            |
| 6:30639369   | <i>TRIM40</i>       | REACTOME_MRNA_SPLICING                            |
| 17:42929985  | <i>CRHR1_2</i>      | REACTOME_MRNA_SPLICING                            |
| 13:49890086  | <i>CAB39L</i>       | REACTOME_MTOR_SIGNALLING                          |
| 13:49897815  | <i>CAB39L</i>       | REACTOME_MTOR_SIGNALLING                          |
| 13:49914395  | <i>CAB39L</i>       | REACTOME_MTOR_SIGNALLING                          |
| 13:49927732  | <i>CAB39L</i>       | REACTOME_MTOR_SIGNALLING                          |
| 13:49944031  | <i>CAB39L</i>       | REACTOME_MTOR_SIGNALLING                          |
| 13:49960054  | <i>CAB39L</i>       | REACTOME_MTOR_SIGNALLING                          |
| 13:49976904  | <i>CAB39L</i>       | REACTOME_MTOR_SIGNALLING                          |
| 13:50013818  | <i>CAB39L</i>       | REACTOME_MTOR_SIGNALLING                          |
| 7:65425894   | <i>GS1-124K5.11</i> | REACTOME_MUCOPOLYSACCHARIDOSES                    |
| 1:205884274  | <i>RAB29</i>        | REACTOME_MULTIFUNCTIONAL_ANION_EXCHANGERS         |
| 2:95967628   | <i>KCNIP3</i>       | REACTOME_MUSCLE_CONTRACTION                       |
| 4:114424939  | <i>CAMK2D</i>       | REACTOME_MUSCLE_CONTRACTION                       |
| 4:114494052  | <i>CAMK2D</i>       | REACTOME_MUSCLE_CONTRACTION                       |
| 4:114529492  | <i>CAMK2D</i>       | REACTOME_MUSCLE_CONTRACTION                       |
| 4:114539964  | <i>CAMK2D</i>       | REACTOME_MUSCLE_CONTRACTION                       |
| 4:114597918  | <i>CAMK2D</i>       | REACTOME_MUSCLE_CONTRACTION                       |
| 8:11558567   | <i>CTSB</i>         | REACTOME_MUSCLE_CONTRACTION                       |
| 8:11599269   | <i>CTSB</i>         | REACTOME_MUSCLE_CONTRACTION                       |
| 8:22421355   | <i>BIN3</i>         | REACTOME_MUSCLE_CONTRACTION                       |
| 14:88681675  | <i>GALC</i>         | REACTOME_MUSCLE_CONTRACTION                       |

|              |                     |                                                     |
|--------------|---------------------|-----------------------------------------------------|
| 14:88709038  | <i>GALC</i>         | REACTOME_MUSCLE_CONTRACTION                         |
| 14:88738350  | <i>GALC</i>         | REACTOME_MUSCLE_CONTRACTION                         |
| 14:88769689  | <i>GALC</i>         | REACTOME_MUSCLE_CONTRACTION                         |
| 14:88778263  | <i>GALC</i>         | REACTOME_MUSCLE_CONTRACTION                         |
| 17:7560294   | <i>V1NB1</i>        | REACTOME_MUSCLE_CONTRACTION                         |
| 5:133558885  | <i>C5orf24</i>      | REACTOME_MYD88_CASCADE_INITIATED_ON_PLASMA_MEMBRANE |
| 6:32151443   | <i>HLA-DRB5</i>     | REACTOME_MYD88_CASCADE_INITIATED_ON_PLASMA_MEMBRANE |
| 10:103185542 | <i>GBF1</i>         | REACTOME_MYD88_CASCADE_INITIATED_ON_PLASMA_MEMBRANE |
| 10:103305087 | <i>GBF1</i>         | REACTOME_MYD88_CASCADE_INITIATED_ON_PLASMA_MEMBRANE |
| 10:103308244 | <i>GBF1</i>         | REACTOME_MYD88_CASCADE_INITIATED_ON_PLASMA_MEMBRANE |
| 16:50730088  | <i>CASC16</i>       | REACTOME_MYD88_CASCADE_INITIATED_ON_PLASMA_MEMBRANE |
| 16:50730446  | <i>CASC16</i>       | REACTOME_MYD88_CASCADE_INITIATED_ON_PLASMA_MEMBRANE |
| 16:50745926  | <i>CASC16</i>       | REACTOME_MYD88_CASCADE_INITIATED_ON_PLASMA_MEMBRANE |
| 17:41845031  | <i>FAM171A2</i>     | REACTOME_MYD88_CASCADE_INITIATED_ON_PLASMA_MEMBRANE |
| 19:1611856   | <i>SPPL2B</i>       | REACTOME_MYOGENESIS                                 |
| 8:21565088   | <i>BIN3</i>         | REACTOME_NCAM1_INTERACTIONS                         |
| 8:21582921   | <i>BIN3</i>         | REACTOME_NCAM1_INTERACTIONS                         |
| 8:21665306   | <i>BIN3</i>         | REACTOME_NCAM1_INTERACTIONS                         |
| 8:21668901   | <i>BIN3</i>         | REACTOME_NCAM1_INTERACTIONS                         |
| 6:112137847  | <i>FYN</i>          | REACTOME_NCAM_SIGNALING_FOR_NEURITE_OUT_GROWTH      |
| 6:112151452  | <i>FYN</i>          | REACTOME_NCAM_SIGNALING_FOR_NEURITE_OUT_GROWTH      |
| 6:112175069  | <i>FYN</i>          | REACTOME_NCAM_SIGNALING_FOR_NEURITE_OUT_GROWTH      |
| 8:21565088   | <i>BIN3</i>         | REACTOME_NCAM_SIGNALING_FOR_NEURITE_OUT_GROWTH      |
| 8:21582921   | <i>BIN3</i>         | REACTOME_NCAM_SIGNALING_FOR_NEURITE_OUT_GROWTH      |
| 8:21665306   | <i>BIN3</i>         | REACTOME_NCAM_SIGNALING_FOR_NEURITE_OUT_GROWTH      |
| 8:21668901   | <i>BIN3</i>         | REACTOME_NCAM_SIGNALING_FOR_NEURITE_OUT_GROWTH      |
| 3:121319489  | <i>KPNA1</i>        | REACTOME_NEDDYLATION                                |
| 3:121324643  | <i>KPNA1</i>        | REACTOME_NEDDYLATION                                |
| 3:121340955  | <i>KPNA1</i>        | REACTOME_NEDDYLATION                                |
| 3:182656610  | <i>MCCC1</i>        | REACTOME_NEDDYLATION                                |
| 4:15608677   | <i>BST1</i>         | REACTOME_NEDDYLATION                                |
| 4:15618898   | <i>BST1</i>         | REACTOME_NEDDYLATION                                |
| 7:66096028   | <i>GS1-124K5.11</i> | REACTOME_NEDDYLATION                                |
| 7:66136281   | <i>GS1-124K5.11</i> | REACTOME_NEDDYLATION                                |
| 10:103185542 | <i>GBF1</i>         | REACTOME_NEDDYLATION                                |
| 10:103305087 | <i>GBF1</i>         | REACTOME_NEDDYLATION                                |
| 10:103308244 | <i>GBF1</i>         | REACTOME_NEDDYLATION                                |
| 6:112137847  | <i>FYN</i>          | REACTOME_NEF_AND_SIGNAL_TRANSDUCTION                |
| 6:112151452  | <i>FYN</i>          | REACTOME_NEF_AND_SIGNAL_TRANSDUCTION                |
| 6:112175069  | <i>FYN</i>          | REACTOME_NEF_AND_SIGNAL_TRANSDUCTION                |
| 5:133558885  | <i>C5orf24</i>      | REACTOME_NEGATIVE_REGULATION_OF_FGFR1_SIGNALING     |
| 5:133558885  | <i>C5orf24</i>      | REACTOME_NEGATIVE_REGULATION_OF_FGFR2_SIGNALING     |
| 5:133558885  | <i>C5orf24</i>      | REACTOME_NEGATIVE_REGULATION_OF_FGFR3_SIGNALING     |
| 5:133558885  | <i>C5orf24</i>      | REACTOME_NEGATIVE_REGULATION_OF_FGFR4_SIGNALING     |
| 5:133558885  | <i>C5orf24</i>      | REACTOME_NEGATIVE_REGULATION_OF_MAPK_PATHWAY        |
| 9:17579690   | <i>SH3GL2_2</i>     | REACTOME_NEGATIVE_REGULATION_OF_MET_ACTIVITY        |
| 9:17587160   | <i>SH3GL2_2</i>     | REACTOME_NEGATIVE_REGULATION_OF_MET_ACTIVITY        |
| 9:17609302   | <i>SH3GL2_2</i>     | REACTOME_NEGATIVE_REGULATION_OF_MET_ACTIVITY        |
| 9:17626762   | <i>SH3GL2_2</i>     | REACTOME_NEGATIVE_REGULATION_OF_MET_ACTIVITY        |
| 9:17627444   | <i>SH3GL2_2</i>     | REACTOME_NEGATIVE_REGULATION_OF_MET_ACTIVITY        |
| 9:17642664   | <i>SH3GL2_2</i>     | REACTOME_NEGATIVE_REGULATION_OF_MET_ACTIVITY        |
| 9:17710876   | <i>SH3GL2_2</i>     | REACTOME_NEGATIVE_REGULATION_OF_MET_ACTIVITY        |
| 9:17732590   | <i>SH3GL2_2</i>     | REACTOME_NEGATIVE_REGULATION_OF_MET_ACTIVITY        |

|             |                 |                                                                                     |
|-------------|-----------------|-------------------------------------------------------------------------------------|
| 9:17737514  | <i>SH3GL2_2</i> | REACTOME_NEGATIVE_REGULATION_OF_MET_ACTIVITY                                        |
| 9:17758945  | <i>SH3GL2_2</i> | REACTOME_NEGATIVE_REGULATION_OF_MET_ACTIVITY                                        |
| 4:114424939 | <i>CAMK2D</i>   | REACTOME_NEGATIVE_REGULATION_OF_NMDA_RECEPTOR_MEDIATED_NEURONAL_TRANSMISSION        |
| 4:114494052 | <i>CAMK2D</i>   | REACTOME_NEGATIVE_REGULATION_OF_NMDA_RECEPTOR_MEDIATED_NEURONAL_TRANSMISSION        |
| 4:114529492 | <i>CAMK2D</i>   | REACTOME_NEGATIVE_REGULATION_OF_NMDA_RECEPTOR_MEDIATED_NEURONAL_TRANSMISSION        |
| 4:114539964 | <i>CAMK2D</i>   | REACTOME_NEGATIVE_REGULATION_OF_NMDA_RECEPTOR_MEDIATED_NEURONAL_TRANSMISSION        |
| 4:114597918 | <i>CAMK2D</i>   | REACTOME_NEGATIVE_REGULATION_OF_NMDA_RECEPTOR_MEDIATED_NEURONAL_TRANSMISSION        |
| 11:83219006 | <i>DLG2</i>     | REACTOME_NEGATIVE_REGULATION_OF_NMDA_RECEPTOR_MEDIATED_NEURONAL_TRANSMISSION        |
| 11:83232915 | <i>DLG2</i>     | REACTOME_NEGATIVE_REGULATION_OF_NMDA_RECEPTOR_MEDIATED_NEURONAL_TRANSMISSION        |
| 11:83282740 | <i>DLG2</i>     | REACTOME_NEGATIVE_REGULATION_OF_NMDA_RECEPTOR_MEDIATED_NEURONAL_TRANSMISSION        |
| 11:83387273 | <i>DLG2</i>     | REACTOME_NEGATIVE_REGULATION_OF_NMDA_RECEPTOR_MEDIATED_NEURONAL_TRANSMISSION        |
| 11:83538733 | <i>DLG2</i>     | REACTOME_NEGATIVE_REGULATION_OF_NMDA_RECEPTOR_MEDIATED_NEURONAL_TRANSMISSION        |
| 11:83544472 | <i>DLG2</i>     | REACTOME_NEGATIVE_REGULATION_OF_NMDA_RECEPTOR_MEDIATED_NEURONAL_TRANSMISSION        |
| 11:83578152 | <i>DLG2</i>     | REACTOME_NEGATIVE_REGULATION_OF_NMDA_RECEPTOR_MEDIATED_NEURONAL_TRANSMISSION        |
| 11:83647657 | <i>DLG2</i>     | REACTOME_NEGATIVE_REGULATION_OF_NMDA_RECEPTOR_MEDIATED_NEURONAL_TRANSMISSION        |
| 11:83669903 | <i>DLG2</i>     | REACTOME_NEGATIVE_REGULATION_OF_NMDA_RECEPTOR_MEDIATED_NEURONAL_TRANSMISSION        |
| 11:83736246 | <i>DLG2</i>     | REACTOME_NEGATIVE_REGULATION_OF_NMDA_RECEPTOR_MEDIATED_NEURONAL_TRANSMISSION        |
| 11:83762918 | <i>DLG2</i>     | REACTOME_NEGATIVE_REGULATION_OF_NMDA_RECEPTOR_MEDIATED_NEURONAL_TRANSMISSION        |
| 11:83823752 | <i>DLG2</i>     | REACTOME_NEGATIVE_REGULATION_OF_NMDA_RECEPTOR_MEDIATED_NEURONAL_TRANSMISSION        |
| 11:83839992 | <i>DLG2</i>     | REACTOME_NEGATIVE_REGULATION_OF_NMDA_RECEPTOR_MEDIATED_NEURONAL_TRANSMISSION        |
| 11:84104763 | <i>DLG2</i>     | REACTOME_NEGATIVE_REGULATION_OF_NMDA_RECEPTOR_MEDIATED_NEURONAL_TRANSMISSION        |
| 11:84169039 | <i>DLG2</i>     | REACTOME_NEGATIVE_REGULATION_OF_NMDA_RECEPTOR_MEDIATED_NEURONAL_TRANSMISSION        |
| 11:84221628 | <i>DLG2</i>     | REACTOME_NEGATIVE_REGULATION_OF_NMDA_RECEPTOR_MEDIATED_NEURONAL_TRANSMISSION        |
| 11:84312008 | <i>DLG2</i>     | REACTOME_NEGATIVE_REGULATION_OF_NMDA_RECEPTOR_MEDIATED_NEURONAL_TRANSMISSION        |
| 11:84324361 | <i>DLG2</i>     | REACTOME_NEGATIVE_REGULATION_OF_NMDA_RECEPTOR_MEDIATED_NEURONAL_TRANSMISSION        |
| 11:84360346 | <i>DLG2</i>     | REACTOME_NEGATIVE_REGULATION_OF_NMDA_RECEPTOR_MEDIATED_NEURONAL_TRANSMISSION        |
| 11:84403409 | <i>DLG2</i>     | REACTOME_NEGATIVE_REGULATION_OF_NMDA_RECEPTOR_MEDIATED_NEURONAL_TRANSMISSION        |
| 17:7101771  | <i>V1NB1</i>    | REACTOME_NEGATIVE_REGULATION_OF_NMDA_RECEPTOR_MEDIATED_NEURONAL_TRANSMISSION        |
| 6:32179319  | <i>HLA-DRB5</i> | REACTOME_NEGATIVE_REGULATION_OF_NOTCH4_SIGNALING                                    |
| 6:32186193  | <i>HLA-DRB5</i> | REACTOME_NEGATIVE_REGULATION_OF_NOTCH4_SIGNALING                                    |
| 17:7129974  | <i>V1NB1</i>    | REACTOME_NEGATIVE_REGULATION_OF_TCF_DEPENDENT_SIGNALING_BY_DVL_INTERACTING_PROTEINS |
| 5:133558885 | <i>C5orf24</i>  | REACTOME_NEGATIVE_REGULATION_OF_THE_PI3K_AKT_NETWORK                                |
| 6:112137847 | <i>FYN</i>      | REACTOME_NEGATIVE_REGULATION_OF_THE_PI3K_AKT_NETWORK                                |
| 6:112151452 | <i>FYN</i>      | REACTOME_NEGATIVE_REGULATION_OF_THE_PI3K_AKT_NETWORK                                |
| 6:112175069 | <i>FYN</i>      | REACTOME_NEGATIVE_REGULATION_OF_THE_PI3K_AKT_NETWORK                                |
| 16:50790891 | <i>CASC16</i>   | REACTOME_NEGATIVE_REGULATORS_OF_DDX58_IFIH1_SIGNALING                               |
| 6:112137847 | <i>FYN</i>      | REACTOME_NEPHRIN_FAMILY_INTERACTIONS                                                |
| 6:112151452 | <i>FYN</i>      | REACTOME_NEPHRIN_FAMILY_INTERACTIONS                                                |
| 6:112175069 | <i>FYN</i>      | REACTOME_NEPHRIN_FAMILY_INTERACTIONS                                                |
| 6:112137847 | <i>FYN</i>      | REACTOME_NETRIN_1_SIGNALING                                                         |
| 6:112151452 | <i>FYN</i>      | REACTOME_NETRIN_1_SIGNALING                                                         |
| 6:112175069 | <i>FYN</i>      | REACTOME_NETRIN_1_SIGNALING                                                         |
| 11:83219006 | <i>DLG2</i>     | REACTOME_NEUREXINS_AND_NEUROLIGINS                                                  |
| 11:83232915 | <i>DLG2</i>     | REACTOME_NEUREXINS_AND_NEUROLIGINS                                                  |
| 11:83282740 | <i>DLG2</i>     | REACTOME_NEUREXINS_AND_NEUROLIGINS                                                  |
| 11:83387273 | <i>DLG2</i>     | REACTOME_NEUREXINS_AND_NEUROLIGINS                                                  |
| 11:83538733 | <i>DLG2</i>     | REACTOME_NEUREXINS_AND_NEUROLIGINS                                                  |
| 11:83544472 | <i>DLG2</i>     | REACTOME_NEUREXINS_AND_NEUROLIGINS                                                  |
| 11:83578152 | <i>DLG2</i>     | REACTOME_NEUREXINS_AND_NEUROLIGINS                                                  |
| 11:83647657 | <i>DLG2</i>     | REACTOME_NEUREXINS_AND_NEUROLIGINS                                                  |
| 11:83669903 | <i>DLG2</i>     | REACTOME_NEUREXINS_AND_NEUROLIGINS                                                  |
| 11:83736246 | <i>DLG2</i>     | REACTOME_NEUREXINS_AND_NEUROLIGINS                                                  |
| 11:83762918 | <i>DLG2</i>     | REACTOME_NEUREXINS_AND_NEUROLIGINS                                                  |

|             |                |                                     |
|-------------|----------------|-------------------------------------|
| 11:83823752 | <i>DLG2</i>    | REACTOME_NEUREXINS_AND_NEUROLIGINS  |
| 11:83839992 | <i>DLG2</i>    | REACTOME_NEUREXINS_AND_NEUROLIGINS  |
| 11:84104763 | <i>DLG2</i>    | REACTOME_NEUREXINS_AND_NEUROLIGINS  |
| 11:84169039 | <i>DLG2</i>    | REACTOME_NEUREXINS_AND_NEUROLIGINS  |
| 11:84221628 | <i>DLG2</i>    | REACTOME_NEUREXINS_AND_NEUROLIGINS  |
| 11:84312008 | <i>DLG2</i>    | REACTOME_NEUREXINS_AND_NEUROLIGINS  |
| 11:84324361 | <i>DLG2</i>    | REACTOME_NEUREXINS_AND_NEUROLIGINS  |
| 11:84360346 | <i>DLG2</i>    | REACTOME_NEUREXINS_AND_NEUROLIGINS  |
| 11:84403409 | <i>DLG2</i>    | REACTOME_NEUREXINS_AND_NEUROLIGINS  |
| 17:7101771  | <i>V1NB1</i>   | REACTOME_NEUREXINS_AND_NEUROLIGINS  |
| 1:156059276 | <i>GBAP1</i>   | REACTOME_NEURODEGENERATIVE_DISEASES |
| 3:48199695  | <i>IP6K2</i>   | REACTOME_NEURODEGENERATIVE_DISEASES |
| 3:48214438  | <i>IP6K2</i>   | REACTOME_NEURODEGENERATIVE_DISEASES |
| 1:204876966 | <i>RAB29</i>   | REACTOME_NEUROFASCIN_INTERACTIONS   |
| 1:204940972 | <i>RAB29</i>   | REACTOME_NEUROFASCIN_INTERACTIONS   |
| 12:41144387 | <i>LRRK2_2</i> | REACTOME_NEUROFASCIN_INTERACTIONS   |
| 12:41147295 | <i>LRRK2_2</i> | REACTOME_NEUROFASCIN_INTERACTIONS   |
| 12:41195135 | <i>LRRK2_2</i> | REACTOME_NEUROFASCIN_INTERACTIONS   |
| 12:41251554 | <i>LRRK2_2</i> | REACTOME_NEUROFASCIN_INTERACTIONS   |
| 12:41255129 | <i>LRRK2_2</i> | REACTOME_NEUROFASCIN_INTERACTIONS   |
| 12:41297969 | <i>LRRK2_2</i> | REACTOME_NEUROFASCIN_INTERACTIONS   |
| 12:41407403 | <i>LRRK2_2</i> | REACTOME_NEUROFASCIN_INTERACTIONS   |
| 1:154701406 | <i>GBAP1</i>   | REACTOME_NEURONAL_SYSTEM            |
| 1:154776412 | <i>GBAP1</i>   | REACTOME_NEURONAL_SYSTEM            |
| 1:154801670 | <i>GBAP1</i>   | REACTOME_NEURONAL_SYSTEM            |
| 1:154804988 | <i>GBAP1</i>   | REACTOME_NEURONAL_SYSTEM            |
| 2:18091890  | <i>KCNS3</i>   | REACTOME_NEURONAL_SYSTEM            |
| 2:18130187  | <i>KCNS3</i>   | REACTOME_NEURONAL_SYSTEM            |
| 2:18141542  | <i>KCNS3</i>   | REACTOME_NEURONAL_SYSTEM            |
| 2:18143082  | <i>KCNS3</i>   | REACTOME_NEURONAL_SYSTEM            |
| 2:18176120  | <i>KCNS3</i>   | REACTOME_NEURONAL_SYSTEM            |
| 2:18247777  | <i>KCNS3</i>   | REACTOME_NEURONAL_SYSTEM            |
| 2:18299564  | <i>KCNS3</i>   | REACTOME_NEURONAL_SYSTEM            |
| 2:18315537  | <i>KCNS3</i>   | REACTOME_NEURONAL_SYSTEM            |
| 2:18335515  | <i>KCNS3</i>   | REACTOME_NEURONAL_SYSTEM            |
| 2:18455049  | <i>KCNS3</i>   | REACTOME_NEURONAL_SYSTEM            |
| 2:18472861  | <i>KCNS3</i>   | REACTOME_NEURONAL_SYSTEM            |
| 3:19236100  | <i>SATB1</i>   | REACTOME_NEURONAL_SYSTEM            |
| 3:19312697  | <i>SATB1</i>   | REACTOME_NEURONAL_SYSTEM            |
| 3:19329968  | <i>SATB1</i>   | REACTOME_NEURONAL_SYSTEM            |
| 3:19334895  | <i>SATB1</i>   | REACTOME_NEURONAL_SYSTEM            |
| 3:19352476  | <i>SATB1</i>   | REACTOME_NEURONAL_SYSTEM            |
| 3:48835245  | <i>IP6K2</i>   | REACTOME_NEURONAL_SYSTEM            |
| 3:123089448 | <i>KPNA1</i>   | REACTOME_NEURONAL_SYSTEM            |
| 4:114424939 | <i>CAMK2D</i>  | REACTOME_NEURONAL_SYSTEM            |
| 4:114494052 | <i>CAMK2D</i>  | REACTOME_NEURONAL_SYSTEM            |
| 4:114529492 | <i>CAMK2D</i>  | REACTOME_NEURONAL_SYSTEM            |
| 4:114539964 | <i>CAMK2D</i>  | REACTOME_NEURONAL_SYSTEM            |
| 4:114597918 | <i>CAMK2D</i>  | REACTOME_NEURONAL_SYSTEM            |
| 6:29565889  | <i>TRIM40</i>  | REACTOME_NEURONAL_SYSTEM            |
| 6:29590715  | <i>TRIM40</i>  | REACTOME_NEURONAL_SYSTEM            |
| 6:72646790  | <i>RIMS1</i>   | REACTOME_NEURONAL_SYSTEM            |
| 6:72648340  | <i>RIMS1</i>   | REACTOME_NEURONAL_SYSTEM            |

|             |               |                          |
|-------------|---------------|--------------------------|
| 6:72686444  | <i>RIMS1</i>  | REACTOME_NEURONAL_SYSTEM |
| 6:72716358  | <i>RIMS1</i>  | REACTOME_NEURONAL_SYSTEM |
| 6:72904599  | <i>RIMS1</i>  | REACTOME_NEURONAL_SYSTEM |
| 6:72913435  | <i>RIMS1</i>  | REACTOME_NEURONAL_SYSTEM |
| 6:72930929  | <i>RIMS1</i>  | REACTOME_NEURONAL_SYSTEM |
| 6:72982289  | <i>RIMS1</i>  | REACTOME_NEURONAL_SYSTEM |
| 6:72986711  | <i>RIMS1</i>  | REACTOME_NEURONAL_SYSTEM |
| 6:73008061  | <i>RIMS1</i>  | REACTOME_NEURONAL_SYSTEM |
| 6:73060492  | <i>RIMS1</i>  | REACTOME_NEURONAL_SYSTEM |
| 6:73383348  | <i>RIMS1</i>  | REACTOME_NEURONAL_SYSTEM |
| 6:73448086  | <i>RIMS1</i>  | REACTOME_NEURONAL_SYSTEM |
| 8:131799767 | <i>FAM49B</i> | REACTOME_NEURONAL_SYSTEM |
| 8:131845512 | <i>FAM49B</i> | REACTOME_NEURONAL_SYSTEM |
| 8:131865425 | <i>FAM49B</i> | REACTOME_NEURONAL_SYSTEM |
| 8:131901170 | <i>FAM49B</i> | REACTOME_NEURONAL_SYSTEM |
| 11:83219006 | <i>DLG2</i>   | REACTOME_NEURONAL_SYSTEM |
| 11:83232915 | <i>DLG2</i>   | REACTOME_NEURONAL_SYSTEM |
| 11:83282740 | <i>DLG2</i>   | REACTOME_NEURONAL_SYSTEM |
| 11:83387273 | <i>DLG2</i>   | REACTOME_NEURONAL_SYSTEM |
| 11:83538733 | <i>DLG2</i>   | REACTOME_NEURONAL_SYSTEM |
| 11:83544472 | <i>DLG2</i>   | REACTOME_NEURONAL_SYSTEM |
| 11:83578152 | <i>DLG2</i>   | REACTOME_NEURONAL_SYSTEM |
| 11:83647657 | <i>DLG2</i>   | REACTOME_NEURONAL_SYSTEM |
| 11:83669903 | <i>DLG2</i>   | REACTOME_NEURONAL_SYSTEM |
| 11:83736246 | <i>DLG2</i>   | REACTOME_NEURONAL_SYSTEM |
| 11:83762918 | <i>DLG2</i>   | REACTOME_NEURONAL_SYSTEM |
| 11:83823752 | <i>DLG2</i>   | REACTOME_NEURONAL_SYSTEM |
| 11:83839992 | <i>DLG2</i>   | REACTOME_NEURONAL_SYSTEM |
| 11:84104763 | <i>DLG2</i>   | REACTOME_NEURONAL_SYSTEM |
| 11:84169039 | <i>DLG2</i>   | REACTOME_NEURONAL_SYSTEM |
| 11:84221628 | <i>DLG2</i>   | REACTOME_NEURONAL_SYSTEM |
| 11:84312008 | <i>DLG2</i>   | REACTOME_NEURONAL_SYSTEM |
| 11:84324361 | <i>DLG2</i>   | REACTOME_NEURONAL_SYSTEM |
| 11:84360346 | <i>DLG2</i>   | REACTOME_NEURONAL_SYSTEM |
| 11:84403409 | <i>DLG2</i>   | REACTOME_NEURONAL_SYSTEM |
| 12:46618863 | <i>SCAF11</i> | REACTOME_NEURONAL_SYSTEM |
| 14:88681675 | <i>GALC</i>   | REACTOME_NEURONAL_SYSTEM |
| 14:88709038 | <i>GALC</i>   | REACTOME_NEURONAL_SYSTEM |
| 14:88738350 | <i>GALC</i>   | REACTOME_NEURONAL_SYSTEM |
| 14:88769689 | <i>GALC</i>   | REACTOME_NEURONAL_SYSTEM |
| 14:88778263 | <i>GALC</i>   | REACTOME_NEURONAL_SYSTEM |
| 16:50300511 | <i>CASC16</i> | REACTOME_NEURONAL_SYSTEM |
| 16:50317039 | <i>CASC16</i> | REACTOME_NEURONAL_SYSTEM |
| 17:7101771  | <i>V1NB1</i>  | REACTOME_NEURONAL_SYSTEM |
| 17:7832034  | <i>V1NB1</i>  | REACTOME_NEURONAL_SYSTEM |
| 17:43999203 | <i>WNT3</i>   | REACTOME_NEURONAL_SYSTEM |
| 17:44005297 | <i>WNT3</i>   | REACTOME_NEURONAL_SYSTEM |
| 17:44019712 | <i>WNT3</i>   | REACTOME_NEURONAL_SYSTEM |
| 17:44060492 | <i>WNT3</i>   | REACTOME_NEURONAL_SYSTEM |
| 17:44065263 | <i>WNT3</i>   | REACTOME_NEURONAL_SYSTEM |
| 17:44081178 | <i>WNT3</i>   | REACTOME_NEURONAL_SYSTEM |
| 17:44083297 | <i>WNT3</i>   | REACTOME_NEURONAL_SYSTEM |
| 17:44800946 | <i>WNT3</i>   | REACTOME_NEURONAL_SYSTEM |

|             |               |                                                                          |
|-------------|---------------|--------------------------------------------------------------------------|
| 17:44833217 | <i>WNT3</i>   | REACTOME_NEURONAL_SYSTEM                                                 |
| 19:2557113  | <i>SPPL2B</i> | REACTOME_NEURONAL_SYSTEM                                                 |
| 19:2563327  | <i>SPPL2B</i> | REACTOME_NEURONAL_SYSTEM                                                 |
| 19:2580057  | <i>SPPL2B</i> | REACTOME_NEURONAL_SYSTEM                                                 |
| 19:2660983  | <i>SPPL2B</i> | REACTOME_NEURONAL_SYSTEM                                                 |
| 21:38984964 | <i>DYRK1A</i> | REACTOME_NEURONAL_SYSTEM                                                 |
| 21:39018136 | <i>DYRK1A</i> | REACTOME_NEURONAL_SYSTEM                                                 |
| 21:39021814 | <i>DYRK1A</i> | REACTOME_NEURONAL_SYSTEM                                                 |
| 21:39039956 | <i>DYRK1A</i> | REACTOME_NEURONAL_SYSTEM                                                 |
| 21:39088785 | <i>DYRK1A</i> | REACTOME_NEURONAL_SYSTEM                                                 |
| 21:39108160 | <i>DYRK1A</i> | REACTOME_NEURONAL_SYSTEM                                                 |
| 21:39120480 | <i>DYRK1A</i> | REACTOME_NEURONAL_SYSTEM                                                 |
| 21:39134980 | <i>DYRK1A</i> | REACTOME_NEURONAL_SYSTEM                                                 |
| 21:39197323 | <i>DYRK1A</i> | REACTOME_NEURONAL_SYSTEM                                                 |
| 21:39217472 | <i>DYRK1A</i> | REACTOME_NEURONAL_SYSTEM                                                 |
| 16:31004169 | <i>SETD1A</i> | REACTOME_NEUROTOXICITY_OF_CLOSTRIDIUM_TOXINS                             |
| 3:48835245  | <i>IP6K2</i>  | REACTOME_NEUROTRANSMITTER_RECEPTORS_AND_POSTSYNAPTIC_SIGNAL_TRANSMISSION |
| 3:123089448 | <i>KPNA1</i>  | REACTOME_NEUROTRANSMITTER_RECEPTORS_AND_POSTSYNAPTIC_SIGNAL_TRANSMISSION |
| 4:114424939 | <i>CAMK2D</i> | REACTOME_NEUROTRANSMITTER_RECEPTORS_AND_POSTSYNAPTIC_SIGNAL_TRANSMISSION |
| 4:114494052 | <i>CAMK2D</i> | REACTOME_NEUROTRANSMITTER_RECEPTORS_AND_POSTSYNAPTIC_SIGNAL_TRANSMISSION |
| 4:114529492 | <i>CAMK2D</i> | REACTOME_NEUROTRANSMITTER_RECEPTORS_AND_POSTSYNAPTIC_SIGNAL_TRANSMISSION |
| 4:114539964 | <i>CAMK2D</i> | REACTOME_NEUROTRANSMITTER_RECEPTORS_AND_POSTSYNAPTIC_SIGNAL_TRANSMISSION |
| 4:114597918 | <i>CAMK2D</i> | REACTOME_NEUROTRANSMITTER_RECEPTORS_AND_POSTSYNAPTIC_SIGNAL_TRANSMISSION |
| 6:29565889  | <i>TRIM40</i> | REACTOME_NEUROTRANSMITTER_RECEPTORS_AND_POSTSYNAPTIC_SIGNAL_TRANSMISSION |
| 6:29590715  | <i>TRIM40</i> | REACTOME_NEUROTRANSMITTER_RECEPTORS_AND_POSTSYNAPTIC_SIGNAL_TRANSMISSION |
| 8:131799767 | <i>FAM49B</i> | REACTOME_NEUROTRANSMITTER_RECEPTORS_AND_POSTSYNAPTIC_SIGNAL_TRANSMISSION |
| 8:131845512 | <i>FAM49B</i> | REACTOME_NEUROTRANSMITTER_RECEPTORS_AND_POSTSYNAPTIC_SIGNAL_TRANSMISSION |
| 8:131865425 | <i>FAM49B</i> | REACTOME_NEUROTRANSMITTER_RECEPTORS_AND_POSTSYNAPTIC_SIGNAL_TRANSMISSION |
| 8:131901170 | <i>FAM49B</i> | REACTOME_NEUROTRANSMITTER_RECEPTORS_AND_POSTSYNAPTIC_SIGNAL_TRANSMISSION |
| 11:83219006 | <i>DLG2</i>   | REACTOME_NEUROTRANSMITTER_RECEPTORS_AND_POSTSYNAPTIC_SIGNAL_TRANSMISSION |
| 11:83232915 | <i>DLG2</i>   | REACTOME_NEUROTRANSMITTER_RECEPTORS_AND_POSTSYNAPTIC_SIGNAL_TRANSMISSION |
| 11:83282740 | <i>DLG2</i>   | REACTOME_NEUROTRANSMITTER_RECEPTORS_AND_POSTSYNAPTIC_SIGNAL_TRANSMISSION |
| 11:83387273 | <i>DLG2</i>   | REACTOME_NEUROTRANSMITTER_RECEPTORS_AND_POSTSYNAPTIC_SIGNAL_TRANSMISSION |
| 11:83538733 | <i>DLG2</i>   | REACTOME_NEUROTRANSMITTER_RECEPTORS_AND_POSTSYNAPTIC_SIGNAL_TRANSMISSION |
| 11:83544472 | <i>DLG2</i>   | REACTOME_NEUROTRANSMITTER_RECEPTORS_AND_POSTSYNAPTIC_SIGNAL_TRANSMISSION |
| 11:83578152 | <i>DLG2</i>   | REACTOME_NEUROTRANSMITTER_RECEPTORS_AND_POSTSYNAPTIC_SIGNAL_TRANSMISSION |
| 11:83647657 | <i>DLG2</i>   | REACTOME_NEUROTRANSMITTER_RECEPTORS_AND_POSTSYNAPTIC_SIGNAL_TRANSMISSION |
| 11:83669903 | <i>DLG2</i>   | REACTOME_NEUROTRANSMITTER_RECEPTORS_AND_POSTSYNAPTIC_SIGNAL_TRANSMISSION |
| 11:83736246 | <i>DLG2</i>   | REACTOME_NEUROTRANSMITTER_RECEPTORS_AND_POSTSYNAPTIC_SIGNAL_TRANSMISSION |
| 11:83762918 | <i>DLG2</i>   | REACTOME_NEUROTRANSMITTER_RECEPTORS_AND_POSTSYNAPTIC_SIGNAL_TRANSMISSION |
| 11:83823752 | <i>DLG2</i>   | REACTOME_NEUROTRANSMITTER_RECEPTORS_AND_POSTSYNAPTIC_SIGNAL_TRANSMISSION |
| 11:83839992 | <i>DLG2</i>   | REACTOME_NEUROTRANSMITTER_RECEPTORS_AND_POSTSYNAPTIC_SIGNAL_TRANSMISSION |
| 11:84104763 | <i>DLG2</i>   | REACTOME_NEUROTRANSMITTER_RECEPTORS_AND_POSTSYNAPTIC_SIGNAL_TRANSMISSION |
| 11:84169039 | <i>DLG2</i>   | REACTOME_NEUROTRANSMITTER_RECEPTORS_AND_POSTSYNAPTIC_SIGNAL_TRANSMISSION |
| 11:84221628 | <i>DLG2</i>   | REACTOME_NEUROTRANSMITTER_RECEPTORS_AND_POSTSYNAPTIC_SIGNAL_TRANSMISSION |
| 11:84312008 | <i>DLG2</i>   | REACTOME_NEUROTRANSMITTER_RECEPTORS_AND_POSTSYNAPTIC_SIGNAL_TRANSMISSION |
| 11:84324361 | <i>DLG2</i>   | REACTOME_NEUROTRANSMITTER_RECEPTORS_AND_POSTSYNAPTIC_SIGNAL_TRANSMISSION |
| 11:84360346 | <i>DLG2</i>   | REACTOME_NEUROTRANSMITTER_RECEPTORS_AND_POSTSYNAPTIC_SIGNAL_TRANSMISSION |
| 11:84403409 | <i>DLG2</i>   | REACTOME_NEUROTRANSMITTER_RECEPTORS_AND_POSTSYNAPTIC_SIGNAL_TRANSMISSION |
| 16:50300511 | <i>CASC16</i> | REACTOME_NEUROTRANSMITTER_RECEPTORS_AND_POSTSYNAPTIC_SIGNAL_TRANSMISSION |
| 16:50317039 | <i>CASC16</i> | REACTOME_NEUROTRANSMITTER_RECEPTORS_AND_POSTSYNAPTIC_SIGNAL_TRANSMISSION |
| 17:7101771  | <i>V1NB1</i>  | REACTOME_NEUROTRANSMITTER_RECEPTORS_AND_POSTSYNAPTIC_SIGNAL_TRANSMISSION |
| 17:43999203 | <i>WNT3</i>   | REACTOME_NEUROTRANSMITTER_RECEPTORS_AND_POSTSYNAPTIC_SIGNAL_TRANSMISSION |

|             |                     |                                                                          |
|-------------|---------------------|--------------------------------------------------------------------------|
| 17:44005297 | <i>WNT3</i>         | REACTOME_NEUROTRANSMITTER_RECEPTORS_AND_POSTSYNAPTIC_SIGNAL_TRANSMISSION |
| 17:44019712 | <i>WNT3</i>         | REACTOME_NEUROTRANSMITTER_RECEPTORS_AND_POSTSYNAPTIC_SIGNAL_TRANSMISSION |
| 17:44060492 | <i>WNT3</i>         | REACTOME_NEUROTRANSMITTER_RECEPTORS_AND_POSTSYNAPTIC_SIGNAL_TRANSMISSION |
| 17:44065263 | <i>WNT3</i>         | REACTOME_NEUROTRANSMITTER_RECEPTORS_AND_POSTSYNAPTIC_SIGNAL_TRANSMISSION |
| 17:44081178 | <i>WNT3</i>         | REACTOME_NEUROTRANSMITTER_RECEPTORS_AND_POSTSYNAPTIC_SIGNAL_TRANSMISSION |
| 17:44083297 | <i>WNT3</i>         | REACTOME_NEUROTRANSMITTER_RECEPTORS_AND_POSTSYNAPTIC_SIGNAL_TRANSMISSION |
| 17:44800946 | <i>WNT3</i>         | REACTOME_NEUROTRANSMITTER_RECEPTORS_AND_POSTSYNAPTIC_SIGNAL_TRANSMISSION |
| 17:44833217 | <i>WNT3</i>         | REACTOME_NEUROTRANSMITTER_RECEPTORS_AND_POSTSYNAPTIC_SIGNAL_TRANSMISSION |
| 19:2557113  | <i>SPPL2B</i>       | REACTOME_NEUROTRANSMITTER_RECEPTORS_AND_POSTSYNAPTIC_SIGNAL_TRANSMISSION |
| 19:2563327  | <i>SPPL2B</i>       | REACTOME_NEUROTRANSMITTER_RECEPTORS_AND_POSTSYNAPTIC_SIGNAL_TRANSMISSION |
| 19:2580057  | <i>SPPL2B</i>       | REACTOME_NEUROTRANSMITTER_RECEPTORS_AND_POSTSYNAPTIC_SIGNAL_TRANSMISSION |
| 19:2660983  | <i>SPPL2B</i>       | REACTOME_NEUROTRANSMITTER_RECEPTORS_AND_POSTSYNAPTIC_SIGNAL_TRANSMISSION |
| 21:38984964 | <i>DYRK1A</i>       | REACTOME_NEUROTRANSMITTER_RECEPTORS_AND_POSTSYNAPTIC_SIGNAL_TRANSMISSION |
| 21:39018136 | <i>DYRK1A</i>       | REACTOME_NEUROTRANSMITTER_RECEPTORS_AND_POSTSYNAPTIC_SIGNAL_TRANSMISSION |
| 21:39021814 | <i>DYRK1A</i>       | REACTOME_NEUROTRANSMITTER_RECEPTORS_AND_POSTSYNAPTIC_SIGNAL_TRANSMISSION |
| 21:39039956 | <i>DYRK1A</i>       | REACTOME_NEUROTRANSMITTER_RECEPTORS_AND_POSTSYNAPTIC_SIGNAL_TRANSMISSION |
| 21:39088785 | <i>DYRK1A</i>       | REACTOME_NEUROTRANSMITTER_RECEPTORS_AND_POSTSYNAPTIC_SIGNAL_TRANSMISSION |
| 21:39108160 | <i>DYRK1A</i>       | REACTOME_NEUROTRANSMITTER_RECEPTORS_AND_POSTSYNAPTIC_SIGNAL_TRANSMISSION |
| 21:39120480 | <i>DYRK1A</i>       | REACTOME_NEUROTRANSMITTER_RECEPTORS_AND_POSTSYNAPTIC_SIGNAL_TRANSMISSION |
| 21:39134980 | <i>DYRK1A</i>       | REACTOME_NEUROTRANSMITTER_RECEPTORS_AND_POSTSYNAPTIC_SIGNAL_TRANSMISSION |
| 21:39197323 | <i>DYRK1A</i>       | REACTOME_NEUROTRANSMITTER_RECEPTORS_AND_POSTSYNAPTIC_SIGNAL_TRANSMISSION |
| 21:39217472 | <i>DYRK1A</i>       | REACTOME_NEUROTRANSMITTER_RECEPTORS_AND_POSTSYNAPTIC_SIGNAL_TRANSMISSION |
| 6:72646790  | <i>RIMS1</i>        | REACTOME_NEUROTRANSMITTER_RELEASE_CYCLE                                  |
| 6:72648340  | <i>RIMS1</i>        | REACTOME_NEUROTRANSMITTER_RELEASE_CYCLE                                  |
| 6:72686444  | <i>RIMS1</i>        | REACTOME_NEUROTRANSMITTER_RELEASE_CYCLE                                  |
| 6:72716358  | <i>RIMS1</i>        | REACTOME_NEUROTRANSMITTER_RELEASE_CYCLE                                  |
| 6:72904599  | <i>RIMS1</i>        | REACTOME_NEUROTRANSMITTER_RELEASE_CYCLE                                  |
| 6:72913435  | <i>RIMS1</i>        | REACTOME_NEUROTRANSMITTER_RELEASE_CYCLE                                  |
| 6:72930929  | <i>RIMS1</i>        | REACTOME_NEUROTRANSMITTER_RELEASE_CYCLE                                  |
| 6:72982289  | <i>RIMS1</i>        | REACTOME_NEUROTRANSMITTER_RELEASE_CYCLE                                  |
| 6:72986711  | <i>RIMS1</i>        | REACTOME_NEUROTRANSMITTER_RELEASE_CYCLE                                  |
| 6:73008061  | <i>RIMS1</i>        | REACTOME_NEUROTRANSMITTER_RELEASE_CYCLE                                  |
| 6:73060492  | <i>RIMS1</i>        | REACTOME_NEUROTRANSMITTER_RELEASE_CYCLE                                  |
| 1:204876966 | <i>RAB29</i>        | REACTOME_NEUTROPHIL_DEGRANULATION                                        |
| 1:204940972 | <i>RAB29</i>        | REACTOME_NEUTROPHIL_DEGRANULATION                                        |
| 1:226044391 | <i>ITPKB</i>        | REACTOME_NEUTROPHIL_DEGRANULATION                                        |
| 1:226052830 | <i>ITPKB</i>        | REACTOME_NEUTROPHIL_DEGRANULATION                                        |
| 3:49406095  | <i>IP6K2</i>        | REACTOME_NEUTROPHIL_DEGRANULATION                                        |
| 3:49424231  | <i>IP6K2</i>        | REACTOME_NEUTROPHIL_DEGRANULATION                                        |
| 3:49450137  | <i>IP6K2</i>        | REACTOME_NEUTROPHIL_DEGRANULATION                                        |
| 4:15709252  | <i>BST1</i>         | REACTOME_NEUTROPHIL_DEGRANULATION                                        |
| 4:15713608  | <i>BST1</i>         | REACTOME_NEUTROPHIL_DEGRANULATION                                        |
| 4:15724372  | <i>BST1</i>         | REACTOME_NEUTROPHIL_DEGRANULATION                                        |
| 4:15737882  | <i>BST1</i>         | REACTOME_NEUTROPHIL_DEGRANULATION                                        |
| 5:101579003 | <i>PAM</i>          | REACTOME_NEUTROPHIL_DEGRANULATION                                        |
| 6:133025715 | <i>RPS12</i>        | REACTOME_NEUTROPHIL_DEGRANULATION                                        |
| 6:133028870 | <i>RPS12</i>        | REACTOME_NEUTROPHIL_DEGRANULATION                                        |
| 7:65425894  | <i>GS1-124K5.11</i> | REACTOME_NEUTROPHIL_DEGRANULATION                                        |
| 8:11712443  | <i>CTSB</i>         | REACTOME_NEUTROPHIL_DEGRANULATION                                        |
| 9:33791164  | <i>UBAP2</i>        | REACTOME_NEUTROPHIL_DEGRANULATION                                        |
| 11:10392432 | <i>RNF141</i>       | REACTOME_NEUTROPHIL_DEGRANULATION                                        |
| 11:10429998 | <i>RNF141</i>       | REACTOME_NEUTROPHIL_DEGRANULATION                                        |
| 11:10458098 | <i>RNF141</i>       | REACTOME_NEUTROPHIL_DEGRANULATION                                        |

|             |                 |                                                                      |
|-------------|-----------------|----------------------------------------------------------------------|
| 11:10471738 | <i>RNF141</i>   | REACTOME_NEUTROPHIL_DEGRANULATION                                    |
| 11:10487997 | <i>RNF141</i>   | REACTOME_NEUTROPHIL_DEGRANULATION                                    |
| 11:10494132 | <i>RNF141</i>   | REACTOME_NEUTROPHIL_DEGRANULATION                                    |
| 11:82582134 | <i>DLG2</i>     | REACTOME_NEUTROPHIL_DEGRANULATION                                    |
| 11:82635123 | <i>DLG2</i>     | REACTOME_NEUTROPHIL_DEGRANULATION                                    |
| 11:82648357 | <i>DLG2</i>     | REACTOME_NEUTROPHIL_DEGRANULATION                                    |
| 12:45755099 | <i>SCAF11</i>   | REACTOME_NEUTROPHIL_DEGRANULATION                                    |
| 16:30510571 | <i>SETD1A</i>   | REACTOME_NEUTROPHIL_DEGRANULATION                                    |
| 16:30516492 | <i>SETD1A</i>   | REACTOME_NEUTROPHIL_DEGRANULATION                                    |
| 16:30520856 | <i>SETD1A</i>   | REACTOME_NEUTROPHIL_DEGRANULATION                                    |
| 16:31370452 | <i>SETD1A</i>   | REACTOME_NEUTROPHIL_DEGRANULATION                                    |
| 17:39883520 | <i>RETREG3</i>  | REACTOME_NEUTROPHIL_DEGRANULATION                                    |
| 17:42423844 | <i>FAM171A2</i> | REACTOME_NEUTROPHIL_DEGRANULATION                                    |
| 17:42426940 | <i>FAM171A2</i> | REACTOME_NEUTROPHIL_DEGRANULATION                                    |
| 17:76869878 | <i>DNAH17</i>   | REACTOME_NEUTROPHIL_DEGRANULATION                                    |
| 2:134902070 | <i>TMEM163</i>  | REACTOME_N_GLYCAN_ANTENNAE_ELONGATION_IN_THE_MEDIAL_TRANS_GOLGI      |
| 2:134932210 | <i>TMEM163</i>  | REACTOME_N_GLYCAN_ANTENNAE_ELONGATION_IN_THE_MEDIAL_TRANS_GOLGI      |
| 2:134956835 | <i>TMEM163</i>  | REACTOME_N_GLYCAN_ANTENNAE_ELONGATION_IN_THE_MEDIAL_TRANS_GOLGI      |
| 2:134986578 | <i>TMEM163</i>  | REACTOME_N_GLYCAN_ANTENNAE_ELONGATION_IN_THE_MEDIAL_TRANS_GOLGI      |
| 2:134993021 | <i>TMEM163</i>  | REACTOME_N_GLYCAN_ANTENNAE_ELONGATION_IN_THE_MEDIAL_TRANS_GOLGI      |
| 2:135035038 | <i>TMEM163</i>  | REACTOME_N_GLYCAN_ANTENNAE_ELONGATION_IN_THE_MEDIAL_TRANS_GOLGI      |
| 2:135040234 | <i>TMEM163</i>  | REACTOME_N_GLYCAN_ANTENNAE_ELONGATION_IN_THE_MEDIAL_TRANS_GOLGI      |
| 2:135165078 | <i>TMEM163</i>  | REACTOME_N_GLYCAN_ANTENNAE_ELONGATION_IN_THE_MEDIAL_TRANS_GOLGI      |
| 2:135166385 | <i>TMEM163</i>  | REACTOME_N_GLYCAN_ANTENNAE_ELONGATION_IN_THE_MEDIAL_TRANS_GOLGI      |
| 2:134902070 | <i>TMEM163</i>  | REACTOME_N_GLYCAN_ANTENNAE_ELONGATION                                |
| 2:134932210 | <i>TMEM163</i>  | REACTOME_N_GLYCAN_ANTENNAE_ELONGATION                                |
| 2:134956835 | <i>TMEM163</i>  | REACTOME_N_GLYCAN_ANTENNAE_ELONGATION                                |
| 2:134986578 | <i>TMEM163</i>  | REACTOME_N_GLYCAN_ANTENNAE_ELONGATION                                |
| 2:134993021 | <i>TMEM163</i>  | REACTOME_N_GLYCAN_ANTENNAE_ELONGATION                                |
| 2:135035038 | <i>TMEM163</i>  | REACTOME_N_GLYCAN_ANTENNAE_ELONGATION                                |
| 2:135040234 | <i>TMEM163</i>  | REACTOME_N_GLYCAN_ANTENNAE_ELONGATION                                |
| 2:135165078 | <i>TMEM163</i>  | REACTOME_N_GLYCAN_ANTENNAE_ELONGATION                                |
| 2:135166385 | <i>TMEM163</i>  | REACTOME_N_GLYCAN_ANTENNAE_ELONGATION                                |
| 6:32151443  | <i>HLA-DRB5</i> | REACTOME_N_GLYCAN_TRIMMING_IN_THE_ER_AND_CALNEXIN_CALRETICULIN_CYCLE |
| 3:122259640 | <i>KPNA1</i>    | REACTOME_NICOTINAMIDE_SALVAGING                                      |
| 5:102889674 | <i>PAM</i>      | REACTOME_NICOTINAMIDE_SALVAGING                                      |
| 3:122259640 | <i>KPNA1</i>    | REACTOME_NICOTINATE_METABOLISM                                       |
| 4:15709252  | <i>BST1</i>     | REACTOME_NICOTINATE_METABOLISM                                       |
| 4:15713608  | <i>BST1</i>     | REACTOME_NICOTINATE_METABOLISM                                       |
| 4:15724372  | <i>BST1</i>     | REACTOME_NICOTINATE_METABOLISM                                       |
| 4:15737882  | <i>BST1</i>     | REACTOME_NICOTINATE_METABOLISM                                       |
| 4:15789288  | <i>BST1</i>     | REACTOME_NICOTINATE_METABOLISM                                       |
| 4:15816670  | <i>BST1</i>     | REACTOME_NICOTINATE_METABOLISM                                       |
| 4:15829612  | <i>BST1</i>     | REACTOME_NICOTINATE_METABOLISM                                       |
| 5:102889674 | <i>PAM</i>      | REACTOME_NICOTINATE_METABOLISM                                       |
| 11:10647977 | <i>RNF141</i>   | REACTOME_NITRIC_OXIDE_STIMULATES_GUANYLATE_CYCLASE                   |
| 11:10648481 | <i>RNF141</i>   | REACTOME_NITRIC_OXIDE_STIMULATES_GUANYLATE_CYCLASE                   |
| 11:10660840 | <i>RNF141</i>   | REACTOME_NITRIC_OXIDE_STIMULATES_GUANYLATE_CYCLASE                   |
| 16:50730088 | <i>CASC16</i>   | REACTOME_NOD1_2_SIGNALING_PATHWAY                                    |
| 16:50730446 | <i>CASC16</i>   | REACTOME_NOD1_2_SIGNALING_PATHWAY                                    |
| 16:50745926 | <i>CASC16</i>   | REACTOME_NOD1_2_SIGNALING_PATHWAY                                    |
| 16:50790891 | <i>CASC16</i>   | REACTOME_NOD1_2_SIGNALING_PATHWAY                                    |
| 1:227067656 | <i>ITPKB</i>    | REACTOME_NONCANONICAL_ACTIVATION_OF_NOTCH3                           |

|             |                 |                                                                      |
|-------------|-----------------|----------------------------------------------------------------------|
| 3:49162284  | <i>IP6K2</i>    | REACTOME_NON_INTEGRIN_MEMBRANE_ECM_INTERACTIONS                      |
| 3:49162583  | <i>IP6K2</i>    | REACTOME_NON_INTEGRIN_MEMBRANE_ECM_INTERACTIONS                      |
| 3:49561208  | <i>IP6K2</i>    | REACTOME_NON_INTEGRIN_MEMBRANE_ECM_INTERACTIONS                      |
| 6:30850582  | <i>TRIM40</i>   | REACTOME_NON_INTEGRIN_MEMBRANE_ECM_INTERACTIONS                      |
| 6:33153528  | <i>HLA-DRB5</i> | REACTOME_NON_INTEGRIN_MEMBRANE_ECM_INTERACTIONS                      |
| 6:112494762 | <i>FYN</i>      | REACTOME_NON_INTEGRIN_MEMBRANE_ECM_INTERACTIONS                      |
| 6:112531401 | <i>FYN</i>      | REACTOME_NON_INTEGRIN_MEMBRANE_ECM_INTERACTIONS                      |
| 6:112561154 | <i>FYN</i>      | REACTOME_NON_INTEGRIN_MEMBRANE_ECM_INTERACTIONS                      |
| 6:112561430 | <i>FYN</i>      | REACTOME_NON_INTEGRIN_MEMBRANE_ECM_INTERACTIONS                      |
| 5:133558885 | <i>C5orf24</i>  | REACTOME_NONSENSE_MEDIATED_DECAY_NMD                                 |
| 6:72646790  | <i>RIMS1</i>    | REACTOME_NOREPINEPHRINE_NEUROTRANSMITTER_RELEASE_CYCLE               |
| 6:72648340  | <i>RIMS1</i>    | REACTOME_NOREPINEPHRINE_NEUROTRANSMITTER_RELEASE_CYCLE               |
| 6:72686444  | <i>RIMS1</i>    | REACTOME_NOREPINEPHRINE_NEUROTRANSMITTER_RELEASE_CYCLE               |
| 6:72716358  | <i>RIMS1</i>    | REACTOME_NOREPINEPHRINE_NEUROTRANSMITTER_RELEASE_CYCLE               |
| 6:72904599  | <i>RIMS1</i>    | REACTOME_NOREPINEPHRINE_NEUROTRANSMITTER_RELEASE_CYCLE               |
| 6:72913435  | <i>RIMS1</i>    | REACTOME_NOREPINEPHRINE_NEUROTRANSMITTER_RELEASE_CYCLE               |
| 6:72930929  | <i>RIMS1</i>    | REACTOME_NOREPINEPHRINE_NEUROTRANSMITTER_RELEASE_CYCLE               |
| 6:72982289  | <i>RIMS1</i>    | REACTOME_NOREPINEPHRINE_NEUROTRANSMITTER_RELEASE_CYCLE               |
| 6:72986711  | <i>RIMS1</i>    | REACTOME_NOREPINEPHRINE_NEUROTRANSMITTER_RELEASE_CYCLE               |
| 6:73008061  | <i>RIMS1</i>    | REACTOME_NOREPINEPHRINE_NEUROTRANSMITTER_RELEASE_CYCLE               |
| 6:73060492  | <i>RIMS1</i>    | REACTOME_NOREPINEPHRINE_NEUROTRANSMITTER_RELEASE_CYCLE               |
| 2:169659620 | <i>STK39</i>    | REACTOME_NOSTRIN_MEDIATED_ENOS_TRAFFICKING                           |
| 19:3008151  | <i>SPPL2B</i>   | REACTOME_NOTCH1_INTRACELLULAR_DOMAIN_REGULATES_TRANSCRIPTION         |
| 19:3024077  | <i>SPPL2B</i>   | REACTOME_NOTCH1_INTRACELLULAR_DOMAIN_REGULATES_TRANSCRIPTION         |
| 1:227067656 | <i>ITPKB</i>    | REACTOME_NOTCH2_ACTIVATION_AND_TRANSMISSION_OF_SIGNAL_TO_THE_NUCLEUS |
| 12:41144387 | <i>LRRK2_2</i>  | REACTOME_NOTCH2_ACTIVATION_AND_TRANSMISSION_OF_SIGNAL_TO_THE_NUCLEUS |
| 12:41147295 | <i>LRRK2_2</i>  | REACTOME_NOTCH2_ACTIVATION_AND_TRANSMISSION_OF_SIGNAL_TO_THE_NUCLEUS |
| 12:41195135 | <i>LRRK2_2</i>  | REACTOME_NOTCH2_ACTIVATION_AND_TRANSMISSION_OF_SIGNAL_TO_THE_NUCLEUS |
| 12:41251554 | <i>LRRK2_2</i>  | REACTOME_NOTCH2_ACTIVATION_AND_TRANSMISSION_OF_SIGNAL_TO_THE_NUCLEUS |
| 12:41255129 | <i>LRRK2_2</i>  | REACTOME_NOTCH2_ACTIVATION_AND_TRANSMISSION_OF_SIGNAL_TO_THE_NUCLEUS |
| 12:41297969 | <i>LRRK2_2</i>  | REACTOME_NOTCH2_ACTIVATION_AND_TRANSMISSION_OF_SIGNAL_TO_THE_NUCLEUS |
| 12:41407403 | <i>LRRK2_2</i>  | REACTOME_NOTCH2_ACTIVATION_AND_TRANSMISSION_OF_SIGNAL_TO_THE_NUCLEUS |
| 1:227067656 | <i>ITPKB</i>    | REACTOME_NOTCH3_ACTIVATION_AND_TRANSMISSION_OF_SIGNAL_TO_THE_NUCLEUS |
| 1:227067656 | <i>ITPKB</i>    | REACTOME_NOTCH4_ACTIVATION_AND_TRANSMISSION_OF_SIGNAL_TO_THE_NUCLEUS |
| 6:32179319  | <i>HLA-DRB5</i> | REACTOME_NOTCH4_ACTIVATION_AND_TRANSMISSION_OF_SIGNAL_TO_THE_NUCLEUS |
| 6:32186193  | <i>HLA-DRB5</i> | REACTOME_NOTCH4_ACTIVATION_AND_TRANSMISSION_OF_SIGNAL_TO_THE_NUCLEUS |
| 6:32179319  | <i>HLA-DRB5</i> | REACTOME_NOTCH4_INTRACELLULAR_DOMAIN_REGULATES_TRANSCRIPTION         |
| 6:32186193  | <i>HLA-DRB5</i> | REACTOME_NOTCH4_INTRACELLULAR_DOMAIN_REGULATES_TRANSCRIPTION         |
| 6:32179319  | <i>HLA-DRB5</i> | REACTOME_NOTCH_HLH_TRANSCRIPTION_PATHWAY                             |
| 6:32186193  | <i>HLA-DRB5</i> | REACTOME_NOTCH_HLH_TRANSCRIPTION_PATHWAY                             |
| 1:155975202 | <i>GBAP1</i>    | REACTOME_NRAGE_SIGNALS_DEATH_THROUGH_JNK                             |
| 17:7101771  | <i>V1NB1</i>    | REACTOME_NRCAM_INTERACTIONS                                          |
| 1:227067656 | <i>ITPKB</i>    | REACTOME_NRIF_SIGNALS_CELL_DEATH_FROM_THE_NUCLEUS                    |
| 6:112137847 | <i>FYN</i>      | REACTOME_NTRK2_ACTIVATES_RAC1                                        |
| 6:112151452 | <i>FYN</i>      | REACTOME_NTRK2_ACTIVATES_RAC1                                        |
| 6:112175069 | <i>FYN</i>      | REACTOME_NTRK2_ACTIVATES_RAC1                                        |
| 1:156059276 | <i>GBAP1</i>    | REACTOME_NUCLEAR_ENVELOPE_BREAKDOWN                                  |
| 1:156059276 | <i>GBAP1</i>    | REACTOME_NUCLEAR_ENVELOPE_REASSEMBLY                                 |
| 5:133558885 | <i>C5orf24</i>  | REACTOME_NUCLEAR_ENVELOPE_REASSEMBLY                                 |
| 5:133558885 | <i>C5orf24</i>  | REACTOME_NUCLEAR_EVENTS_KINASE_AND_TRANSCRIPTION_FACTOR_ACTIVATION   |
| 17:41845031 | <i>FAM171A2</i> | REACTOME_NUCLEAR_EVENTS_KINASE_AND_TRANSCRIPTION_FACTOR_ACTIVATION   |
| 15:61016235 | <i>VPS13C</i>   | REACTOME_NUCLEAR_RECEPTOR_TRANSCRIPTION_PATHWAY                      |
| 15:61065568 | <i>VPS13C</i>   | REACTOME_NUCLEAR_RECEPTOR_TRANSCRIPTION_PATHWAY                      |

|              |          |                                                                                                  |
|--------------|----------|--------------------------------------------------------------------------------------------------|
| 15:61094298  | VPS13C   | REACTOME_NUCLEAR_RECEPTOR_TRANSCRIPTION_PATHWAY                                                  |
| 15:61140736  | VPS13C   | REACTOME_NUCLEAR_RECEPTOR_TRANSCRIPTION_PATHWAY                                                  |
| 15:61142062  | VPS13C   | REACTOME_NUCLEAR_RECEPTOR_TRANSCRIPTION_PATHWAY                                                  |
| 15:61162571  | VPS13C   | REACTOME_NUCLEAR_RECEPTOR_TRANSCRIPTION_PATHWAY                                                  |
| 15:61191617  | VPS13C   | REACTOME_NUCLEAR_RECEPTOR_TRANSCRIPTION_PATHWAY                                                  |
| 15:61195427  | VPS13C   | REACTOME_NUCLEAR_RECEPTOR_TRANSCRIPTION_PATHWAY                                                  |
| 15:61221682  | VPS13C   | REACTOME_NUCLEAR_RECEPTOR_TRANSCRIPTION_PATHWAY                                                  |
| 15:61298486  | VPS13C   | REACTOME_NUCLEAR_RECEPTOR_TRANSCRIPTION_PATHWAY                                                  |
| 15:61375480  | VPS13C   | REACTOME_NUCLEAR_RECEPTOR_TRANSCRIPTION_PATHWAY                                                  |
| 15:61434581  | VPS13C   | REACTOME_NUCLEAR_RECEPTOR_TRANSCRIPTION_PATHWAY                                                  |
| 15:61467078  | VPS13C   | REACTOME_NUCLEAR_RECEPTOR_TRANSCRIPTION_PATHWAY                                                  |
| 15:61470808  | VPS13C   | REACTOME_NUCLEAR_RECEPTOR_TRANSCRIPTION_PATHWAY                                                  |
| 15:61500263  | VPS13C   | REACTOME_NUCLEAR_RECEPTOR_TRANSCRIPTION_PATHWAY                                                  |
| 1:227067656  | ITPKB    | REACTOME_NUCLEAR_SIGNALING_BY_ERBB4                                                              |
| 17:42990894  | CRHR1_2  | REACTOME_NUCLEAR_SIGNALING_BY_ERBB4                                                              |
| 10:104847713 | GBF1     | REACTOME_NUCLEOBASE_CATABOLISM                                                                   |
| 10:104861736 | GBF1     | REACTOME_NUCLEOBASE_CATABOLISM                                                                   |
| 10:104926485 | GBF1     | REACTOME_NUCLEOBASE_CATABOLISM                                                                   |
| 10:104929716 | GBF1     | REACTOME_NUCLEOBASE_CATABOLISM                                                                   |
| 14:74477206  | RPS6KL1  | REACTOME_NUCLEOBASE_CATABOLISM                                                                   |
| 16:50730088  | CASC16   | REACTOME_NUCLEOTIDE_BINDING_DOMAIN_LEUCINE_RICH_REPEAT_CONTAINING_RECEPTOR_NLR_SIGNALING_PATHWAY |
| 16:50730446  | CASC16   | REACTOME_NUCLEOTIDE_BINDING_DOMAIN_LEUCINE_RICH_REPEAT_CONTAINING_RECEPTOR_NLR_SIGNALING_PATHWAY |
| 16:50745926  | CASC16   | REACTOME_NUCLEOTIDE_BINDING_DOMAIN_LEUCINE_RICH_REPEAT_CONTAINING_RECEPTOR_NLR_SIGNALING_PATHWAY |
| 16:50790891  | CASC16   | REACTOME_NUCLEOTIDE_BINDING_DOMAIN_LEUCINE_RICH_REPEAT_CONTAINING_RECEPTOR_NLR_SIGNALING_PATHWAY |
| 1:226568665  | ITPKB    | REACTOME_NUCLEOTIDE_EXCISION_REPAIR                                                              |
| 12:133206648 | FBRSL1   | REACTOME_NUCLEOTIDE_EXCISION_REPAIR                                                              |
| 12:133223685 | FBRSL1   | REACTOME_NUCLEOTIDE_EXCISION_REPAIR                                                              |
| 3:150935203  | MED12L   | REACTOME_NUCLEOTIDE_LIKE_PURINERGIC_RECEPTORS                                                    |
| 3:151090424  | MED12L   | REACTOME_NUCLEOTIDE_LIKE_PURINERGIC_RECEPTORS                                                    |
| 3:151099733  | MED12L   | REACTOME_NUCLEOTIDE_LIKE_PURINERGIC_RECEPTORS                                                    |
| 11:10392432  | RNF141   | REACTOME_NUCLEOTIDE_SALVAGE                                                                      |
| 11:10429998  | RNF141   | REACTOME_NUCLEOTIDE_SALVAGE                                                                      |
| 11:10458098  | RNF141   | REACTOME_NUCLEOTIDE_SALVAGE                                                                      |
| 11:10471738  | RNF141   | REACTOME_NUCLEOTIDE_SALVAGE                                                                      |
| 11:10487997  | RNF141   | REACTOME_NUCLEOTIDE_SALVAGE                                                                      |
| 11:10494132  | RNF141   | REACTOME_NUCLEOTIDE_SALVAGE                                                                      |
| 17:76177567  | DNAH17   | REACTOME_NUCLEOTIDE_SALVAGE                                                                      |
| 17:42332803  | FAM171A2 | REACTOME_O2_CO2_EXCHANGE_IN_ERYTHROCYTES                                                         |
| 17:42338993  | FAM171A2 | REACTOME_O2_CO2_EXCHANGE_IN_ERYTHROCYTES                                                         |
| 3:122645304  | KPNA1    | REACTOME_O_GLYCOSYLATION_OF_TSR_DOMAIN_CONTAINING_PROTEINS                                       |
| 3:122720608  | KPNA1    | REACTOME_O_GLYCOSYLATION_OF_TSR_DOMAIN_CONTAINING_PROTEINS                                       |
| 9:18502815   | SH3GL2_2 | REACTOME_O_GLYCOSYLATION_OF_TSR_DOMAIN_CONTAINING_PROTEINS                                       |
| 9:18522254   | SH3GL2_2 | REACTOME_O_GLYCOSYLATION_OF_TSR_DOMAIN_CONTAINING_PROTEINS                                       |
| 9:18583014   | SH3GL2_2 | REACTOME_O_GLYCOSYLATION_OF_TSR_DOMAIN_CONTAINING_PROTEINS                                       |
| 9:18623302   | SH3GL2_2 | REACTOME_O_GLYCOSYLATION_OF_TSR_DOMAIN_CONTAINING_PROTEINS                                       |
| 9:18633417   | SH3GL2_2 | REACTOME_O_GLYCOSYLATION_OF_TSR_DOMAIN_CONTAINING_PROTEINS                                       |
| 9:18663540   | SH3GL2_2 | REACTOME_O_GLYCOSYLATION_OF_TSR_DOMAIN_CONTAINING_PROTEINS                                       |
| 9:18721847   | SH3GL2_2 | REACTOME_O_GLYCOSYLATION_OF_TSR_DOMAIN_CONTAINING_PROTEINS                                       |
| 9:18725820   | SH3GL2_2 | REACTOME_O_GLYCOSYLATION_OF_TSR_DOMAIN_CONTAINING_PROTEINS                                       |
| 6:29373213   | TRIM40   | REACTOME_OLFACTORY_SIGNALING_PATHWAY                                                             |
| 6:29407378   | TRIM40   | REACTOME_OLFACTORY_SIGNALING_PATHWAY                                                             |
| 6:29412222   | TRIM40   | REACTOME_OLFACTORY_SIGNALING_PATHWAY                                                             |
| 3:182976382  | MCCC1    | REACTOME_O_LINKED_GLYCOSYLATION_OF_MUCINS                                                        |

|              |                 |                                           |
|--------------|-----------------|-------------------------------------------|
| 3:182979912  | <i>MCCC1</i>    | REACTOME_O_LINKED_GLYCOSYLATION_OF_MUCINS |
| 3:183005320  | <i>MCCC1</i>    | REACTOME_O_LINKED_GLYCOSYLATION_OF_MUCINS |
| 11:11299050  | <i>RNF141</i>   | REACTOME_O_LINKED_GLYCOSYLATION_OF_MUCINS |
| 11:11316049  | <i>RNF141</i>   | REACTOME_O_LINKED_GLYCOSYLATION_OF_MUCINS |
| 11:11364660  | <i>RNF141</i>   | REACTOME_O_LINKED_GLYCOSYLATION_OF_MUCINS |
| 11:11399582  | <i>RNF141</i>   | REACTOME_O_LINKED_GLYCOSYLATION_OF_MUCINS |
| 11:11412180  | <i>RNF141</i>   | REACTOME_O_LINKED_GLYCOSYLATION_OF_MUCINS |
| 11:11494181  | <i>RNF141</i>   | REACTOME_O_LINKED_GLYCOSYLATION_OF_MUCINS |
| 11:11504200  | <i>RNF141</i>   | REACTOME_O_LINKED_GLYCOSYLATION_OF_MUCINS |
| 11:11508780  | <i>RNF141</i>   | REACTOME_O_LINKED_GLYCOSYLATION_OF_MUCINS |
| 11:11519365  | <i>RNF141</i>   | REACTOME_O_LINKED_GLYCOSYLATION_OF_MUCINS |
| 12:132687184 | <i>FBRSL1</i>   | REACTOME_O_LINKED_GLYCOSYLATION_OF_MUCINS |
| 3:49561208   | <i>IP6K2</i>    | REACTOME_O_LINKED_GLYCOSYLATION           |
| 3:122645304  | <i>KPNA1</i>    | REACTOME_O_LINKED_GLYCOSYLATION           |
| 3:122720608  | <i>KPNA1</i>    | REACTOME_O_LINKED_GLYCOSYLATION           |
| 3:182976382  | <i>MCCC1</i>    | REACTOME_O_LINKED_GLYCOSYLATION           |
| 3:182979912  | <i>MCCC1</i>    | REACTOME_O_LINKED_GLYCOSYLATION           |
| 3:183005320  | <i>MCCC1</i>    | REACTOME_O_LINKED_GLYCOSYLATION           |
| 9:18502815   | <i>SH3GL2_2</i> | REACTOME_O_LINKED_GLYCOSYLATION           |
| 9:18522254   | <i>SH3GL2_2</i> | REACTOME_O_LINKED_GLYCOSYLATION           |
| 9:18583014   | <i>SH3GL2_2</i> | REACTOME_O_LINKED_GLYCOSYLATION           |
| 9:18623302   | <i>SH3GL2_2</i> | REACTOME_O_LINKED_GLYCOSYLATION           |
| 9:18633417   | <i>SH3GL2_2</i> | REACTOME_O_LINKED_GLYCOSYLATION           |
| 9:18663540   | <i>SH3GL2_2</i> | REACTOME_O_LINKED_GLYCOSYLATION           |
| 9:18721847   | <i>SH3GL2_2</i> | REACTOME_O_LINKED_GLYCOSYLATION           |
| 9:18725820   | <i>SH3GL2_2</i> | REACTOME_O_LINKED_GLYCOSYLATION           |
| 11:11299050  | <i>RNF141</i>   | REACTOME_O_LINKED_GLYCOSYLATION           |
| 11:11316049  | <i>RNF141</i>   | REACTOME_O_LINKED_GLYCOSYLATION           |
| 11:11364660  | <i>RNF141</i>   | REACTOME_O_LINKED_GLYCOSYLATION           |
| 11:11399582  | <i>RNF141</i>   | REACTOME_O_LINKED_GLYCOSYLATION           |
| 11:11412180  | <i>RNF141</i>   | REACTOME_O_LINKED_GLYCOSYLATION           |
| 11:11494181  | <i>RNF141</i>   | REACTOME_O_LINKED_GLYCOSYLATION           |
| 11:11504200  | <i>RNF141</i>   | REACTOME_O_LINKED_GLYCOSYLATION           |
| 11:11508780  | <i>RNF141</i>   | REACTOME_O_LINKED_GLYCOSYLATION           |
| 11:11519365  | <i>RNF141</i>   | REACTOME_O_LINKED_GLYCOSYLATION           |
| 12:132687184 | <i>FBRSL1</i>   | REACTOME_O_LINKED_GLYCOSYLATION           |
| 17:7578671   | <i>V1NB1</i>    | REACTOME_ONCOGENE_INDUCED_SENESCENCE      |
| 1:156059276  | <i>GBAP1</i>    | REACTOME_ONCOGENIC_MAPK_SIGNALING         |
| 4:114424939  | <i>CAMK2D</i>   | REACTOME_ONCOGENIC_MAPK_SIGNALING         |
| 4:114494052  | <i>CAMK2D</i>   | REACTOME_ONCOGENIC_MAPK_SIGNALING         |
| 4:114529492  | <i>CAMK2D</i>   | REACTOME_ONCOGENIC_MAPK_SIGNALING         |
| 4:114539964  | <i>CAMK2D</i>   | REACTOME_ONCOGENIC_MAPK_SIGNALING         |
| 4:114597918  | <i>CAMK2D</i>   | REACTOME_ONCOGENIC_MAPK_SIGNALING         |
| 17:42454243  | <i>FAM171A2</i> | REACTOME_ONCOGENIC_MAPK_SIGNALING         |
| 3:48835245   | <i>IP6K2</i>    | REACTOME_OPIOID_SIGNALLING                |
| 3:123089448  | <i>KPNA1</i>    | REACTOME_OPIOID_SIGNALLING                |
| 4:114424939  | <i>CAMK2D</i>   | REACTOME_OPIOID_SIGNALLING                |
| 4:114494052  | <i>CAMK2D</i>   | REACTOME_OPIOID_SIGNALLING                |
| 4:114529492  | <i>CAMK2D</i>   | REACTOME_OPIOID_SIGNALLING                |
| 4:114539964  | <i>CAMK2D</i>   | REACTOME_OPIOID_SIGNALLING                |
| 4:114597918  | <i>CAMK2D</i>   | REACTOME_OPIOID_SIGNALLING                |
| 5:59236972   | <i>ELOVL7</i>   | REACTOME_OPIOID_SIGNALLING                |
| 5:59490965   | <i>ELOVL7</i>   | REACTOME_OPIOID_SIGNALLING                |

|              |                |                                               |
|--------------|----------------|-----------------------------------------------|
| 5:59554719   | <i>ELOVL7</i>  | REACTOME_OPIOID_SIGNALLING                    |
| 5:59705316   | <i>ELOVL7</i>  | REACTOME_OPIOID_SIGNALLING                    |
| 5:59736085   | <i>ELOVL7</i>  | REACTOME_OPIOID_SIGNALLING                    |
| 5:59812853   | <i>ELOVL7</i>  | REACTOME_OPIOID_SIGNALLING                    |
| 5:133558885  | <i>C5orf24</i> | REACTOME_OPIOID_SIGNALLING                    |
| 8:131799767  | <i>FAM49B</i>  | REACTOME_OPIOID_SIGNALLING                    |
| 8:131845512  | <i>FAM49B</i>  | REACTOME_OPIOID_SIGNALLING                    |
| 8:131865425  | <i>FAM49B</i>  | REACTOME_OPIOID_SIGNALLING                    |
| 8:131901170  | <i>FAM49B</i>  | REACTOME_OPIOID_SIGNALLING                    |
| 16:50300511  | <i>CASC16</i>  | REACTOME_OPIOID_SIGNALLING                    |
| 16:50317039  | <i>CASC16</i>  | REACTOME_OPIOID_SIGNALLING                    |
| 19:2557113   | <i>SPPL2B</i>  | REACTOME_OPIOID_SIGNALLING                    |
| 19:2563327   | <i>SPPL2B</i>  | REACTOME_OPIOID_SIGNALLING                    |
| 19:2580057   | <i>SPPL2B</i>  | REACTOME_OPIOID_SIGNALLING                    |
| 19:2660983   | <i>SPPL2B</i>  | REACTOME_OPIOID_SIGNALLING                    |
| 20:5934513   | <i>CRLS1</i>   | REACTOME_ORC1_REMOVAL_FROM_CHROMATIN          |
| 20:5935522   | <i>CRLS1</i>   | REACTOME_ORC1_REMOVAL_FROM_CHROMATIN          |
| 20:5968737   | <i>CRLS1</i>   | REACTOME_ORC1_REMOVAL_FROM_CHROMATIN          |
| 20:5968964   | <i>CRLS1</i>   | REACTOME_ORC1_REMOVAL_FROM_CHROMATIN          |
| 1:155181232  | <i>GBAP1</i>   | REACTOME_ORGANELLE_BIOGENESIS_AND_MAINTENANCE |
| 3:121553904  | <i>KPNA1</i>   | REACTOME_ORGANELLE_BIOGENESIS_AND_MAINTENANCE |
| 4:15492268   | <i>BST1</i>    | REACTOME_ORGANELLE_BIOGENESIS_AND_MAINTENANCE |
| 4:15547513   | <i>BST1</i>    | REACTOME_ORGANELLE_BIOGENESIS_AND_MAINTENANCE |
| 6:30601232   | <i>TRIM40</i>  | REACTOME_ORGANELLE_BIOGENESIS_AND_MAINTENANCE |
| 6:30612107   | <i>TRIM40</i>  | REACTOME_ORGANELLE_BIOGENESIS_AND_MAINTENANCE |
| 8:131145058  | <i>FAM49B</i>  | REACTOME_ORGANELLE_BIOGENESIS_AND_MAINTENANCE |
| 8:131153067  | <i>FAM49B</i>  | REACTOME_ORGANELLE_BIOGENESIS_AND_MAINTENANCE |
| 8:131245821  | <i>FAM49B</i>  | REACTOME_ORGANELLE_BIOGENESIS_AND_MAINTENANCE |
| 8:131328260  | <i>FAM49B</i>  | REACTOME_ORGANELLE_BIOGENESIS_AND_MAINTENANCE |
| 8:131404984  | <i>FAM49B</i>  | REACTOME_ORGANELLE_BIOGENESIS_AND_MAINTENANCE |
| 8:131408202  | <i>FAM49B</i>  | REACTOME_ORGANELLE_BIOGENESIS_AND_MAINTENANCE |
| 8:131455469  | <i>FAM49B</i>  | REACTOME_ORGANELLE_BIOGENESIS_AND_MAINTENANCE |
| 9:34300212   | <i>UBAP2</i>   | REACTOME_ORGANELLE_BIOGENESIS_AND_MAINTENANCE |
| 10:104005410 | <i>GBF1</i>    | REACTOME_ORGANELLE_BIOGENESIS_AND_MAINTENANCE |
| 10:104034550 | <i>GBF1</i>    | REACTOME_ORGANELLE_BIOGENESIS_AND_MAINTENANCE |
| 10:104258303 | <i>GBF1</i>    | REACTOME_ORGANELLE_BIOGENESIS_AND_MAINTENANCE |
| 10:104443875 | <i>GBF1</i>    | REACTOME_ORGANELLE_BIOGENESIS_AND_MAINTENANCE |
| 10:104452818 | <i>GBF1</i>    | REACTOME_ORGANELLE_BIOGENESIS_AND_MAINTENANCE |
| 16:19562008  | <i>SYT17</i>   | REACTOME_ORGANELLE_BIOGENESIS_AND_MAINTENANCE |
| 4:114424939  | <i>CAMK2D</i>  | REACTOME_OTHER_INTERLEUKIN_SIGNALING          |
| 4:114494052  | <i>CAMK2D</i>  | REACTOME_OTHER_INTERLEUKIN_SIGNALING          |
| 4:114529492  | <i>CAMK2D</i>  | REACTOME_OTHER_INTERLEUKIN_SIGNALING          |
| 4:114539964  | <i>CAMK2D</i>  | REACTOME_OTHER_INTERLEUKIN_SIGNALING          |
| 4:114597918  | <i>CAMK2D</i>  | REACTOME_OTHER_INTERLEUKIN_SIGNALING          |
| 5:133558885  | <i>C5orf24</i> | REACTOME_OTHER_INTERLEUKIN_SIGNALING          |
| 6:112137847  | <i>FYN</i>     | REACTOME_OTHER_INTERLEUKIN_SIGNALING          |
| 6:112151452  | <i>FYN</i>     | REACTOME_OTHER_INTERLEUKIN_SIGNALING          |
| 6:112175069  | <i>FYN</i>     | REACTOME_OTHER_INTERLEUKIN_SIGNALING          |
| 8:21565088   | <i>BIN3</i>    | REACTOME_OTHER_INTERLEUKIN_SIGNALING          |
| 8:21582921   | <i>BIN3</i>    | REACTOME_OTHER_INTERLEUKIN_SIGNALING          |
| 8:21665306   | <i>BIN3</i>    | REACTOME_OTHER_INTERLEUKIN_SIGNALING          |
| 8:21668901   | <i>BIN3</i>    | REACTOME_OTHER_INTERLEUKIN_SIGNALING          |
| 11:83219006  | <i>DLG2</i>    | REACTOME_OTHER_INTERLEUKIN_SIGNALING          |

|              |                 |                                                          |
|--------------|-----------------|----------------------------------------------------------|
| 11:83232915  | <i>DLG2</i>     | REACTOME_OTHER_INTERLEUKIN_SIGNALING                     |
| 11:83282740  | <i>DLG2</i>     | REACTOME_OTHER_INTERLEUKIN_SIGNALING                     |
| 11:83387273  | <i>DLG2</i>     | REACTOME_OTHER_INTERLEUKIN_SIGNALING                     |
| 11:83538733  | <i>DLG2</i>     | REACTOME_OTHER_INTERLEUKIN_SIGNALING                     |
| 11:83544472  | <i>DLG2</i>     | REACTOME_OTHER_INTERLEUKIN_SIGNALING                     |
| 11:83578152  | <i>DLG2</i>     | REACTOME_OTHER_INTERLEUKIN_SIGNALING                     |
| 11:83647657  | <i>DLG2</i>     | REACTOME_OTHER_INTERLEUKIN_SIGNALING                     |
| 11:83669903  | <i>DLG2</i>     | REACTOME_OTHER_INTERLEUKIN_SIGNALING                     |
| 11:83736246  | <i>DLG2</i>     | REACTOME_OTHER_INTERLEUKIN_SIGNALING                     |
| 11:83762918  | <i>DLG2</i>     | REACTOME_OTHER_INTERLEUKIN_SIGNALING                     |
| 11:83823752  | <i>DLG2</i>     | REACTOME_OTHER_INTERLEUKIN_SIGNALING                     |
| 11:83839992  | <i>DLG2</i>     | REACTOME_OTHER_INTERLEUKIN_SIGNALING                     |
| 11:84104763  | <i>DLG2</i>     | REACTOME_OTHER_INTERLEUKIN_SIGNALING                     |
| 11:84169039  | <i>DLG2</i>     | REACTOME_OTHER_INTERLEUKIN_SIGNALING                     |
| 11:84221628  | <i>DLG2</i>     | REACTOME_OTHER_INTERLEUKIN_SIGNALING                     |
| 11:84312008  | <i>DLG2</i>     | REACTOME_OTHER_INTERLEUKIN_SIGNALING                     |
| 11:84324361  | <i>DLG2</i>     | REACTOME_OTHER_INTERLEUKIN_SIGNALING                     |
| 11:84360346  | <i>DLG2</i>     | REACTOME_OTHER_INTERLEUKIN_SIGNALING                     |
| 11:84403409  | <i>DLG2</i>     | REACTOME_OTHER_INTERLEUKIN_SIGNALING                     |
| 17:7101771   | <i>V1NB1</i>    | REACTOME_OTHER_INTERLEUKIN_SIGNALING                     |
| 17:40392358  | <i>RETREG3</i>  | REACTOME_OTHER_INTERLEUKIN_SIGNALING                     |
| 17:42454243  | <i>FAM171A2</i> | REACTOME_OTHER_INTERLEUKIN_SIGNALING                     |
| 3:49406095   | <i>IP6K2</i>    | REACTOME_OVARIAN_TUMOR_DOMAIN_PROTEASES                  |
| 3:49424231   | <i>IP6K2</i>    | REACTOME_OVARIAN_TUMOR_DOMAIN_PROTEASES                  |
| 3:49450137   | <i>IP6K2</i>    | REACTOME_OVARIAN_TUMOR_DOMAIN_PROTEASES                  |
| 16:50730088  | <i>CASC16</i>   | REACTOME_OVARIAN_TUMOR_DOMAIN_PROTEASES                  |
| 16:50730446  | <i>CASC16</i>   | REACTOME_OVARIAN_TUMOR_DOMAIN_PROTEASES                  |
| 16:50745926  | <i>CASC16</i>   | REACTOME_OVARIAN_TUMOR_DOMAIN_PROTEASES                  |
| 17:7578671   | <i>V1NB1</i>    | REACTOME_OVARIAN_TUMOR_DOMAIN_PROTEASES                  |
| 2:102357447  | <i>MAP4K4</i>   | REACTOME_OXIDATIVE_STRESS_INDUCED_SENESCENCE             |
| 2:102379173  | <i>MAP4K4</i>   | REACTOME_OXIDATIVE_STRESS_INDUCED_SENESCENCE             |
| 2:102413116  | <i>MAP4K4</i>   | REACTOME_OXIDATIVE_STRESS_INDUCED_SENESCENCE             |
| 17:7578671   | <i>V1NB1</i>    | REACTOME_OXIDATIVE_STRESS_INDUCED_SENESCENCE             |
| 17:42454243  | <i>FAM171A2</i> | REACTOME_P130CAS_LINKAGE_TO_MAPK_SIGNALING_FOR_INTEGRINS |
| 3:150935203  | <i>MED12L</i>   | REACTOME_P2Y_RECEPTORS                                   |
| 3:151090424  | <i>MED12L</i>   | REACTOME_P2Y_RECEPTORS                                   |
| 3:151099733  | <i>MED12L</i>   | REACTOME_P2Y_RECEPTORS                                   |
| 1:155975202  | <i>GBAP1</i>    | REACTOME_P75_NTR_RECEPTOR_MEDIATED_SIGNALLING            |
| 1:227067656  | <i>ITPKB</i>    | REACTOME_P75_NTR_RECEPTOR_MEDIATED_SIGNALLING            |
| 3:49406095   | <i>IP6K2</i>    | REACTOME_P75_NTR_RECEPTOR_MEDIATED_SIGNALLING            |
| 3:49424231   | <i>IP6K2</i>    | REACTOME_P75_NTR_RECEPTOR_MEDIATED_SIGNALLING            |
| 3:49450137   | <i>IP6K2</i>    | REACTOME_P75_NTR_RECEPTOR_MEDIATED_SIGNALLING            |
| 3:49406095   | <i>IP6K2</i>    | REACTOME_P75NTR_REGULATES_AXONOGENESIS                   |
| 3:49424231   | <i>IP6K2</i>    | REACTOME_P75NTR_REGULATES_AXONOGENESIS                   |
| 3:49450137   | <i>IP6K2</i>    | REACTOME_P75NTR_REGULATES_AXONOGENESIS                   |
| 9:33447547   | <i>UBAP2</i>    | REACTOME_PASSIVE_TRANSPORT_BY_AQUAPORINS                 |
| 12:133206648 | <i>FBRSL1</i>   | REACTOME_PCNA_DEPENDENT_LONG_PATCH_BASE_EXCISION_REPAIR  |
| 12:133223685 | <i>FBRSL1</i>   | REACTOME_PCNA_DEPENDENT_LONG_PATCH_BASE_EXCISION_REPAIR  |
| 3:49406095   | <i>IP6K2</i>    | REACTOME_PCP_CE_PATHWAY                                  |
| 3:49424231   | <i>IP6K2</i>    | REACTOME_PCP_CE_PATHWAY                                  |
| 3:49450137   | <i>IP6K2</i>    | REACTOME_PCP_CE_PATHWAY                                  |
| 17:7129974   | <i>V1NB1</i>    | REACTOME_PCP_CE_PATHWAY                                  |
| 6:32602372   | <i>HLA-DRB5</i> | REACTOME_PD_1_SIGNALING                                  |

|              |                     |                                                                                                 |
|--------------|---------------------|-------------------------------------------------------------------------------------------------|
| 6:112137847  | <i>FYN</i>          | REACTOME_PECAM1_INTERACTIONS                                                                    |
| 6:112151452  | <i>FYN</i>          | REACTOME_PECAM1_INTERACTIONS                                                                    |
| 6:112175069  | <i>FYN</i>          | REACTOME_PECAM1_INTERACTIONS                                                                    |
| 8:11558567   | <i>CTSB</i>         | REACTOME_PEPTIDE_HORMONE_METABOLISM                                                             |
| 8:11599269   | <i>CTSB</i>         | REACTOME_PEPTIDE_HORMONE_METABOLISM                                                             |
| 4:76924571   | <i>FAM47E-STBD1</i> | REACTOME_PEPTIDE_LIGAND_BINDING_RECEPTORS                                                       |
| 20:5290081   | <i>CRLS1</i>        | REACTOME_PEPTIDE_LIGAND_BINDING_RECEPTORS                                                       |
| 1:161875645  | <i>FCGR2A</i>       | REACTOME_PERK_REGULATES_GENE_EXPRESSION                                                         |
| 1:161930954  | <i>FCGR2A</i>       | REACTOME_PERK_REGULATES_GENE_EXPRESSION                                                         |
| 4:114424939  | <i>CAMK2D</i>       | REACTOME_PHASE_0_RAPID_DEPOLARISATION                                                           |
| 4:114494052  | <i>CAMK2D</i>       | REACTOME_PHASE_0_RAPID_DEPOLARISATION                                                           |
| 4:114529492  | <i>CAMK2D</i>       | REACTOME_PHASE_0_RAPID_DEPOLARISATION                                                           |
| 4:114539964  | <i>CAMK2D</i>       | REACTOME_PHASE_0_RAPID_DEPOLARISATION                                                           |
| 4:114597918  | <i>CAMK2D</i>       | REACTOME_PHASE_0_RAPID_DEPOLARISATION                                                           |
| 2:95967628   | <i>KCNIP3</i>       | REACTOME_PHASE_1_INACTIVATION_OF_FAST_NAPLUS_CHANNELS                                           |
| 14:88681675  | <i>GALC</i>         | REACTOME_PHASE_4_RESTING_MEMBRANE_POTENTIAL                                                     |
| 14:88709038  | <i>GALC</i>         | REACTOME_PHASE_4_RESTING_MEMBRANE_POTENTIAL                                                     |
| 14:88738350  | <i>GALC</i>         | REACTOME_PHASE_4_RESTING_MEMBRANE_POTENTIAL                                                     |
| 14:88769689  | <i>GALC</i>         | REACTOME_PHASE_4_RESTING_MEMBRANE_POTENTIAL                                                     |
| 14:88778263  | <i>GALC</i>         | REACTOME_PHASE_4_RESTING_MEMBRANE_POTENTIAL                                                     |
| 7:65705034   | <i>GS1-124K5.11</i> | REACTOME_PHASE_II_CONJUGATION_OF_COMPOUNDS                                                      |
| 7:65824287   | <i>GS1-124K5.11</i> | REACTOME_PHASE_II_CONJUGATION_OF_COMPOUNDS                                                      |
| 10:104635620 | <i>GBF1</i>         | REACTOME_PHASE_II_CONJUGATION_OF_COMPOUNDS                                                      |
| 4:17465704   | <i>LCORL</i>        | REACTOME_PHENYLALANINE_AND_TYROSINE_METABOLISM                                                  |
| 4:17503839   | <i>LCORL</i>        | REACTOME_PHENYLALANINE_AND_TYROSINE_METABOLISM                                                  |
| 4:17465704   | <i>LCORL</i>        | REACTOME_PHENYLALANINE_METABOLISM                                                               |
| 4:17503839   | <i>LCORL</i>        | REACTOME_PHENYLALANINE_METABOLISM                                                               |
| 14:74477206  | <i>RPS6KL1</i>      | REACTOME_PHOSPHATE_BOND_HYDROLYSIS_BY_NTPDASE_PROTEINS                                          |
| 2:96858914   | <i>KCNIP3</i>       | REACTOME_PHOSPHOLIPID_METABOLISM                                                                |
| 6:31846234   | <i>HLA-DRB5</i>     | REACTOME_PHOSPHOLIPID_METABOLISM                                                                |
| 8:17161374   | <i>FGF20</i>        | REACTOME_PHOSPHOLIPID_METABOLISM                                                                |
| 8:17176046   | <i>FGF20</i>        | REACTOME_PHOSPHOLIPID_METABOLISM                                                                |
| 8:17243260   | <i>FGF20</i>        | REACTOME_PHOSPHOLIPID_METABOLISM                                                                |
| 8:17260937   | <i>FGF20</i>        | REACTOME_PHOSPHOLIPID_METABOLISM                                                                |
| 10:121505277 | <i>INPP5F</i>       | REACTOME_PHOSPHOLIPID_METABOLISM                                                                |
| 10:121538407 | <i>INPP5F</i>       | REACTOME_PHOSPHOLIPID_METABOLISM                                                                |
| 10:121560563 | <i>INPP5F</i>       | REACTOME_PHOSPHOLIPID_METABOLISM                                                                |
| 12:123561638 | <i>HIP1R</i>        | REACTOME_PHOSPHOLIPID_METABOLISM                                                                |
| 12:123585705 | <i>HIP1R</i>        | REACTOME_PHOSPHOLIPID_METABOLISM                                                                |
| 16:29871730  | <i>CD19</i>         | REACTOME_PHOSPHOLIPID_METABOLISM                                                                |
| 17:6370241   | <i>V1NB1</i>        | REACTOME_PHOSPHOLIPID_METABOLISM                                                                |
| 17:6406333   | <i>V1NB1</i>        | REACTOME_PHOSPHOLIPID_METABOLISM                                                                |
| 20:5575860   | <i>CRLS1</i>        | REACTOME_PHOSPHOLIPID_METABOLISM                                                                |
| 20:6011934   | <i>CRLS1</i>        | REACTOME_PHOSPHOLIPID_METABOLISM                                                                |
| 6:32602372   | <i>HLA-DRB5</i>     | REACTOME_PHOSPHORYLATION_OF_CD3_AND_TCR_ZETA_CHAINS                                             |
| 17:45215865  | <i>WNT3</i>         | REACTOME_PHOSPHORYLATION_OF_THE_APC_C                                                           |
| 17:45244822  | <i>WNT3</i>         | REACTOME_PHOSPHORYLATION_OF_THE_APC_C                                                           |
| 5:133558885  | <i>C5orf24</i>      | ME_PHOSPHORYLATION_SITE_MUTANTS_OF_CTNNB1_ARE_NOT_TARGETED_TO_THE_PROTEASOME_BY_THE_DESTRUCTION |
| 8:11558567   | <i>CTSB</i>         | REACTOME_PHYSIOLOGICAL_FACTORS                                                                  |
| 8:11599269   | <i>CTSB</i>         | REACTOME_PHYSIOLOGICAL_FACTORS                                                                  |
| 3:49406095   | <i>IP6K2</i>        | REACTOME_PI3K_AKT_ACTIVATION                                                                    |
| 3:49424231   | <i>IP6K2</i>        | REACTOME_PI3K_AKT_ACTIVATION                                                                    |
| 3:49450137   | <i>IP6K2</i>        | REACTOME_PI3K_AKT_ACTIVATION                                                                    |

|              |                 |                                                        |
|--------------|-----------------|--------------------------------------------------------|
| 6:112137847  | <i>FYN</i>      | REACTOME_PI3K_AKT_SIGNALING_IN_CANCER                  |
| 6:112151452  | <i>FYN</i>      | REACTOME_PI3K_AKT_SIGNALING_IN_CANCER                  |
| 6:112175069  | <i>FYN</i>      | REACTOME_PI3K_AKT_SIGNALING_IN_CANCER                  |
| 17:7578671   | <i>V1NB1</i>    | REACTOME_PI5P_REGULATES_TP53_ACETYLATION               |
| 8:17161374   | <i>FGF20</i>    | REACTOME_PI_METABOLISM                                 |
| 8:17176046   | <i>FGF20</i>    | REACTOME_PI_METABOLISM                                 |
| 8:17243260   | <i>FGF20</i>    | REACTOME_PI_METABOLISM                                 |
| 8:17260937   | <i>FGF20</i>    | REACTOME_PI_METABOLISM                                 |
| 10:121505277 | <i>INPP5F</i>   | REACTOME_PI_METABOLISM                                 |
| 10:121538407 | <i>INPP5F</i>   | REACTOME_PI_METABOLISM                                 |
| 10:121560563 | <i>INPP5F</i>   | REACTOME_PI_METABOLISM                                 |
| 3:48835245   | <i>IP6K2</i>    | REACTOME_PKA_ACTIVATION_IN_GLUCAGON_SIGNALLING         |
| 3:123089448  | <i>KPNA1</i>    | REACTOME_PKA_ACTIVATION_IN_GLUCAGON_SIGNALLING         |
| 8:131799767  | <i>FAM49B</i>   | REACTOME_PKA_ACTIVATION_IN_GLUCAGON_SIGNALLING         |
| 8:131845512  | <i>FAM49B</i>   | REACTOME_PKA_ACTIVATION_IN_GLUCAGON_SIGNALLING         |
| 8:131865425  | <i>FAM49B</i>   | REACTOME_PKA_ACTIVATION_IN_GLUCAGON_SIGNALLING         |
| 8:131901170  | <i>FAM49B</i>   | REACTOME_PKA_ACTIVATION_IN_GLUCAGON_SIGNALLING         |
| 16:50300511  | <i>CASC16</i>   | REACTOME_PKA_ACTIVATION_IN_GLUCAGON_SIGNALLING         |
| 16:50317039  | <i>CASC16</i>   | REACTOME_PKA_ACTIVATION_IN_GLUCAGON_SIGNALLING         |
| 3:48835245   | <i>IP6K2</i>    | REACTOME_PKA_MEDIATED_PHOSPHORYLATION_OF_CREB          |
| 3:123089448  | <i>KPNA1</i>    | REACTOME_PKA_MEDIATED_PHOSPHORYLATION_OF_CREB          |
| 8:131799767  | <i>FAM49B</i>   | REACTOME_PKA_MEDIATED_PHOSPHORYLATION_OF_CREB          |
| 8:131845512  | <i>FAM49B</i>   | REACTOME_PKA_MEDIATED_PHOSPHORYLATION_OF_CREB          |
| 8:131865425  | <i>FAM49B</i>   | REACTOME_PKA_MEDIATED_PHOSPHORYLATION_OF_CREB          |
| 8:131901170  | <i>FAM49B</i>   | REACTOME_PKA_MEDIATED_PHOSPHORYLATION_OF_CREB          |
| 16:50300511  | <i>CASC16</i>   | REACTOME_PKA_MEDIATED_PHOSPHORYLATION_OF_CREB          |
| 16:50317039  | <i>CASC16</i>   | REACTOME_PKA_MEDIATED_PHOSPHORYLATION_OF_CREB          |
| 1:155359992  | <i>GBAP1</i>    | REACTOME_PKMTS_METHYLATE_HISTONE_LYSINES               |
| 6:31862876   | <i>HLA-DRB5</i> | REACTOME_PKMTS_METHYLATE_HISTONE_LYSINES               |
| 19:2172266   | <i>SPPL2B</i>   | REACTOME_PKMTS_METHYLATE_HISTONE_LYSINES               |
| 19:2202252   | <i>SPPL2B</i>   | REACTOME_PKMTS_METHYLATE_HISTONE_LYSINES               |
| 3:49406095   | <i>IP6K2</i>    | REACTOME_PLATELET_ACTIVATION_SIGNALING_AND_AGGREGATION |
| 3:49424231   | <i>IP6K2</i>    | REACTOME_PLATELET_ACTIVATION_SIGNALING_AND_AGGREGATION |
| 3:49450137   | <i>IP6K2</i>    | REACTOME_PLATELET_ACTIVATION_SIGNALING_AND_AGGREGATION |
| 3:151090424  | <i>MED12L</i>   | REACTOME_PLATELET_ACTIVATION_SIGNALING_AND_AGGREGATION |
| 3:151099733  | <i>MED12L</i>   | REACTOME_PLATELET_ACTIVATION_SIGNALING_AND_AGGREGATION |
| 4:90804532   | <i>SNCA_2</i>   | REACTOME_PLATELET_ACTIVATION_SIGNALING_AND_AGGREGATION |
| 4:90868355   | <i>SNCA_2</i>   | REACTOME_PLATELET_ACTIVATION_SIGNALING_AND_AGGREGATION |
| 6:31682029   | <i>HLA-DRB5</i> | REACTOME_PLATELET_ACTIVATION_SIGNALING_AND_AGGREGATION |
| 6:112137847  | <i>FYN</i>      | REACTOME_PLATELET_ACTIVATION_SIGNALING_AND_AGGREGATION |
| 6:112151452  | <i>FYN</i>      | REACTOME_PLATELET_ACTIVATION_SIGNALING_AND_AGGREGATION |
| 6:112175069  | <i>FYN</i>      | REACTOME_PLATELET_ACTIVATION_SIGNALING_AND_AGGREGATION |
| 8:130914130  | <i>FAM49B</i>   | REACTOME_PLATELET_ACTIVATION_SIGNALING_AND_AGGREGATION |
| 8:131002284  | <i>FAM49B</i>   | REACTOME_PLATELET_ACTIVATION_SIGNALING_AND_AGGREGATION |
| 17:42454243  | <i>FAM171A2</i> | REACTOME_PLATELET_ACTIVATION_SIGNALING_AND_AGGREGATION |
| 17:76969183  | <i>DNAH17</i>   | REACTOME_PLATELET_ACTIVATION_SIGNALING_AND_AGGREGATION |
| 19:2557113   | <i>SPPL2B</i>   | REACTOME_PLATELET_ACTIVATION_SIGNALING_AND_AGGREGATION |
| 19:2563327   | <i>SPPL2B</i>   | REACTOME_PLATELET_ACTIVATION_SIGNALING_AND_AGGREGATION |
| 19:2580057   | <i>SPPL2B</i>   | REACTOME_PLATELET_ACTIVATION_SIGNALING_AND_AGGREGATION |
| 19:2660983   | <i>SPPL2B</i>   | REACTOME_PLATELET_ACTIVATION_SIGNALING_AND_AGGREGATION |
| 19:3142784   | <i>SPPL2B</i>   | REACTOME_PLATELET_ACTIVATION_SIGNALING_AND_AGGREGATION |
| 19:3147326   | <i>SPPL2B</i>   | REACTOME_PLATELET_ACTIVATION_SIGNALING_AND_AGGREGATION |
| 6:112137847  | <i>FYN</i>      | REACTOME_PLATELET_ADHESION_TO_EXPOSED_COLLAGEN         |

|              |                     |                                                                              |
|--------------|---------------------|------------------------------------------------------------------------------|
| 6:112151452  | <i>FYN</i>          | REACTOME_PLATELET_ADHESION_TO_EXPOSED_COLLAGEN                               |
| 6:112175069  | <i>FYN</i>          | REACTOME_PLATELET_ADHESION_TO_EXPOSED_COLLAGEN                               |
| 17:42454243  | <i>FAM171A2</i>     | REACTOME_PLATELET_AGGREGATION_PLUG_FORMATION                                 |
| 5:133558885  | <i>C5orf24</i>      | REACTOME_PLATELET_HOMEOSTASIS                                                |
| 11:10647977  | <i>RNF141</i>       | REACTOME_PLATELET_HOMEOSTASIS                                                |
| 11:10648481  | <i>RNF141</i>       | REACTOME_PLATELET_HOMEOSTASIS                                                |
| 11:10660840  | <i>RNF141</i>       | REACTOME_PLATELET_HOMEOSTASIS                                                |
| 19:2557113   | <i>SPPL2B</i>       | REACTOME_PLATELET_HOMEOSTASIS                                                |
| 19:2563327   | <i>SPPL2B</i>       | REACTOME_PLATELET_HOMEOSTASIS                                                |
| 19:2580057   | <i>SPPL2B</i>       | REACTOME_PLATELET_HOMEOSTASIS                                                |
| 19:2660983   | <i>SPPL2B</i>       | REACTOME_PLATELET_HOMEOSTASIS                                                |
| 5:133558885  | <i>C5orf24</i>      | REACTOME_PLATELET_SENSITIZATION_BY_LDL                                       |
| 1:226568665  | <i>ITPKB</i>        | REACTOME_POLB_DEPENDENT_LONG_PATCH_BASE_EXCISION_REPAIR                      |
| 1:226497419  | <i>ITPKB</i>        | REACTOME_POLO_LIKE_KINASE_MEDIATED_EVENTS                                    |
| 3:48199695   | <i>IP6K2</i>        | REACTOME_POLO_LIKE_KINASE_MEDIATED_EVENTS                                    |
| 3:48214438   | <i>IP6K2</i>        | REACTOME_POLO_LIKE_KINASE_MEDIATED_EVENTS                                    |
| 14:74640180  | <i>RPS6KL1</i>      | REACTOME_POLO_LIKE_KINASE_MEDIATED_EVENTS                                    |
| 6:31862876   | <i>HLA-DRB5</i>     | REACTOME_POSITIVE_EPIGENETIC_REGULATION_OF_RRNA_EXPRESSION                   |
| 1:172386261  | <i>VAMP4</i>        | REACTOME_POST_TRANSLATIONAL_MODIFICATION: SYNTHESIS_OF_GPI_ANCHORED_PROTEINS |
| 1:172388441  | <i>VAMP4</i>        | REACTOME_POST_TRANSLATIONAL_MODIFICATION: SYNTHESIS_OF_GPI_ANCHORED_PROTEINS |
| 1:172389198  | <i>VAMP4</i>        | REACTOME_POST_TRANSLATIONAL_MODIFICATION: SYNTHESIS_OF_GPI_ANCHORED_PROTEINS |
| 4:15709252   | <i>BST1</i>         | REACTOME_POST_TRANSLATIONAL_MODIFICATION: SYNTHESIS_OF_GPI_ANCHORED_PROTEINS |
| 4:15713608   | <i>BST1</i>         | REACTOME_POST_TRANSLATIONAL_MODIFICATION: SYNTHESIS_OF_GPI_ANCHORED_PROTEINS |
| 4:15724372   | <i>BST1</i>         | REACTOME_POST_TRANSLATIONAL_MODIFICATION: SYNTHESIS_OF_GPI_ANCHORED_PROTEINS |
| 4:15737882   | <i>BST1</i>         | REACTOME_POST_TRANSLATIONAL_MODIFICATION: SYNTHESIS_OF_GPI_ANCHORED_PROTEINS |
| 4:76986566   | <i>FAM47E-STBD1</i> | REACTOME_POST_TRANSLATIONAL_MODIFICATION: SYNTHESIS_OF_GPI_ANCHORED_PROTEINS |
| 4:77021433   | <i>FAM47E-STBD1</i> | REACTOME_POST_TRANSLATIONAL_MODIFICATION: SYNTHESIS_OF_GPI_ANCHORED_PROTEINS |
| 6:133025715  | <i>RPS12</i>        | REACTOME_POST_TRANSLATIONAL_MODIFICATION: SYNTHESIS_OF_GPI_ANCHORED_PROTEINS |
| 6:133028870  | <i>RPS12</i>        | REACTOME_POST_TRANSLATIONAL_MODIFICATION: SYNTHESIS_OF_GPI_ANCHORED_PROTEINS |
| 6:133075265  | <i>RPS12</i>        | REACTOME_POST_TRANSLATIONAL_MODIFICATION: SYNTHESIS_OF_GPI_ANCHORED_PROTEINS |
| 11:132796757 | <i>IGSF9B</i>       | REACTOME_POST_TRANSLATIONAL_MODIFICATION: SYNTHESIS_OF_GPI_ANCHORED_PROTEINS |
| 11:132803872 | <i>IGSF9B</i>       | REACTOME_POST_TRANSLATIONAL_MODIFICATION: SYNTHESIS_OF_GPI_ANCHORED_PROTEINS |
| 11:132894570 | <i>IGSF9B</i>       | REACTOME_POST_TRANSLATIONAL_MODIFICATION: SYNTHESIS_OF_GPI_ANCHORED_PROTEINS |
| 11:132905763 | <i>IGSF9B</i>       | REACTOME_POST_TRANSLATIONAL_MODIFICATION: SYNTHESIS_OF_GPI_ANCHORED_PROTEINS |
| 11:132911017 | <i>IGSF9B</i>       | REACTOME_POST_TRANSLATIONAL_MODIFICATION: SYNTHESIS_OF_GPI_ANCHORED_PROTEINS |
| 11:132913867 | <i>IGSF9B</i>       | REACTOME_POST_TRANSLATIONAL_MODIFICATION: SYNTHESIS_OF_GPI_ANCHORED_PROTEINS |
| 11:132920409 | <i>IGSF9B</i>       | REACTOME_POST_TRANSLATIONAL_MODIFICATION: SYNTHESIS_OF_GPI_ANCHORED_PROTEINS |
| 11:132922730 | <i>IGSF9B</i>       | REACTOME_POST_TRANSLATIONAL_MODIFICATION: SYNTHESIS_OF_GPI_ANCHORED_PROTEINS |
| 11:132941181 | <i>IGSF9B</i>       | REACTOME_POST_TRANSLATIONAL_MODIFICATION: SYNTHESIS_OF_GPI_ANCHORED_PROTEINS |
| 11:133012999 | <i>IGSF9B</i>       | REACTOME_POST_TRANSLATIONAL_MODIFICATION: SYNTHESIS_OF_GPI_ANCHORED_PROTEINS |
| 11:133022507 | <i>IGSF9B</i>       | REACTOME_POST_TRANSLATIONAL_MODIFICATION: SYNTHESIS_OF_GPI_ANCHORED_PROTEINS |
| 11:133088981 | <i>IGSF9B</i>       | REACTOME_POST_TRANSLATIONAL_MODIFICATION: SYNTHESIS_OF_GPI_ANCHORED_PROTEINS |
| 11:133095792 | <i>IGSF9B</i>       | REACTOME_POST_TRANSLATIONAL_MODIFICATION: SYNTHESIS_OF_GPI_ANCHORED_PROTEINS |
| 11:133147495 | <i>IGSF9B</i>       | REACTOME_POST_TRANSLATIONAL_MODIFICATION: SYNTHESIS_OF_GPI_ANCHORED_PROTEINS |
| 11:133341504 | <i>IGSF9B</i>       | REACTOME_POST_TRANSLATIONAL_MODIFICATION: SYNTHESIS_OF_GPI_ANCHORED_PROTEINS |
| 1:156037357  | <i>GBAP1</i>        | REACTOME_POST_TRANSLATIONAL_PROTEIN_MODIFICATION                             |
| 1:172386261  | <i>VAMP4</i>        | REACTOME_POST_TRANSLATIONAL_PROTEIN_MODIFICATION                             |
| 1:172388441  | <i>VAMP4</i>        | REACTOME_POST_TRANSLATIONAL_PROTEIN_MODIFICATION                             |
| 1:172389198  | <i>VAMP4</i>        | REACTOME_POST_TRANSLATIONAL_PROTEIN_MODIFICATION                             |
| 1:226568665  | <i>ITPKB</i>        | REACTOME_POST_TRANSLATIONAL_PROTEIN_MODIFICATION                             |
| 2:17941653   | <i>KCNS3</i>        | REACTOME_POST_TRANSLATIONAL_PROTEIN_MODIFICATION                             |
| 2:17963171   | <i>KCNS3</i>        | REACTOME_POST_TRANSLATIONAL_PROTEIN_MODIFICATION                             |
| 2:134902070  | <i>TMEM163</i>      | REACTOME_POST_TRANSLATIONAL_PROTEIN_MODIFICATION                             |

|             |                     |                                                  |
|-------------|---------------------|--------------------------------------------------|
| 2:134932210 | <i>TMEM163</i>      | REACTOME_POST_TRANSLATIONAL_PROTEIN_MODIFICATION |
| 2:134956835 | <i>TMEM163</i>      | REACTOME_POST_TRANSLATIONAL_PROTEIN_MODIFICATION |
| 2:134986578 | <i>TMEM163</i>      | REACTOME_POST_TRANSLATIONAL_PROTEIN_MODIFICATION |
| 2:134993021 | <i>TMEM163</i>      | REACTOME_POST_TRANSLATIONAL_PROTEIN_MODIFICATION |
| 2:135035038 | <i>TMEM163</i>      | REACTOME_POST_TRANSLATIONAL_PROTEIN_MODIFICATION |
| 2:135040234 | <i>TMEM163</i>      | REACTOME_POST_TRANSLATIONAL_PROTEIN_MODIFICATION |
| 2:135165078 | <i>TMEM163</i>      | REACTOME_POST_TRANSLATIONAL_PROTEIN_MODIFICATION |
| 2:135166385 | <i>TMEM163</i>      | REACTOME_POST_TRANSLATIONAL_PROTEIN_MODIFICATION |
| 3:18395010  | <i>SATB1</i>        | REACTOME_POST_TRANSLATIONAL_PROTEIN_MODIFICATION |
| 3:18472577  | <i>SATB1</i>        | REACTOME_POST_TRANSLATIONAL_PROTEIN_MODIFICATION |
| 3:48199695  | <i>IP6K2</i>        | REACTOME_POST_TRANSLATIONAL_PROTEIN_MODIFICATION |
| 3:48214438  | <i>IP6K2</i>        | REACTOME_POST_TRANSLATIONAL_PROTEIN_MODIFICATION |
| 3:49162284  | <i>IP6K2</i>        | REACTOME_POST_TRANSLATIONAL_PROTEIN_MODIFICATION |
| 3:49162583  | <i>IP6K2</i>        | REACTOME_POST_TRANSLATIONAL_PROTEIN_MODIFICATION |
| 3:49406095  | <i>IP6K2</i>        | REACTOME_POST_TRANSLATIONAL_PROTEIN_MODIFICATION |
| 3:49424231  | <i>IP6K2</i>        | REACTOME_POST_TRANSLATIONAL_PROTEIN_MODIFICATION |
| 3:49450137  | <i>IP6K2</i>        | REACTOME_POST_TRANSLATIONAL_PROTEIN_MODIFICATION |
| 3:49462410  | <i>IP6K2</i>        | REACTOME_POST_TRANSLATIONAL_PROTEIN_MODIFICATION |
| 3:49561208  | <i>IP6K2</i>        | REACTOME_POST_TRANSLATIONAL_PROTEIN_MODIFICATION |
| 3:49740895  | <i>IP6K2</i>        | REACTOME_POST_TRANSLATIONAL_PROTEIN_MODIFICATION |
| 3:121319489 | <i>KPNA1</i>        | REACTOME_POST_TRANSLATIONAL_PROTEIN_MODIFICATION |
| 3:121324643 | <i>KPNA1</i>        | REACTOME_POST_TRANSLATIONAL_PROTEIN_MODIFICATION |
| 3:121340955 | <i>KPNA1</i>        | REACTOME_POST_TRANSLATIONAL_PROTEIN_MODIFICATION |
| 3:121411876 | <i>KPNA1</i>        | REACTOME_POST_TRANSLATIONAL_PROTEIN_MODIFICATION |
| 3:121412702 | <i>KPNA1</i>        | REACTOME_POST_TRANSLATIONAL_PROTEIN_MODIFICATION |
| 3:122645304 | <i>KPNA1</i>        | REACTOME_POST_TRANSLATIONAL_PROTEIN_MODIFICATION |
| 3:122720608 | <i>KPNA1</i>        | REACTOME_POST_TRANSLATIONAL_PROTEIN_MODIFICATION |
| 3:122986429 | <i>KPNA1</i>        | REACTOME_POST_TRANSLATIONAL_PROTEIN_MODIFICATION |
| 3:182656610 | <i>MCCC1</i>        | REACTOME_POST_TRANSLATIONAL_PROTEIN_MODIFICATION |
| 3:182976382 | <i>MCCC1</i>        | REACTOME_POST_TRANSLATIONAL_PROTEIN_MODIFICATION |
| 3:182979912 | <i>MCCC1</i>        | REACTOME_POST_TRANSLATIONAL_PROTEIN_MODIFICATION |
| 3:183005320 | <i>MCCC1</i>        | REACTOME_POST_TRANSLATIONAL_PROTEIN_MODIFICATION |
| 4:15608677  | <i>BST1</i>         | REACTOME_POST_TRANSLATIONAL_PROTEIN_MODIFICATION |
| 4:15618898  | <i>BST1</i>         | REACTOME_POST_TRANSLATIONAL_PROTEIN_MODIFICATION |
| 4:15709252  | <i>BST1</i>         | REACTOME_POST_TRANSLATIONAL_PROTEIN_MODIFICATION |
| 4:15713608  | <i>BST1</i>         | REACTOME_POST_TRANSLATIONAL_PROTEIN_MODIFICATION |
| 4:15724372  | <i>BST1</i>         | REACTOME_POST_TRANSLATIONAL_PROTEIN_MODIFICATION |
| 4:15737882  | <i>BST1</i>         | REACTOME_POST_TRANSLATIONAL_PROTEIN_MODIFICATION |
| 4:76695927  | <i>FAM47E-STBD1</i> | REACTOME_POST_TRANSLATIONAL_PROTEIN_MODIFICATION |
| 4:76986566  | <i>FAM47E-STBD1</i> | REACTOME_POST_TRANSLATIONAL_PROTEIN_MODIFICATION |
| 4:77021433  | <i>FAM47E-STBD1</i> | REACTOME_POST_TRANSLATIONAL_PROTEIN_MODIFICATION |
| 4:113947327 | <i>CAMK2D</i>       | REACTOME_POST_TRANSLATIONAL_PROTEIN_MODIFICATION |
| 4:114015252 | <i>CAMK2D</i>       | REACTOME_POST_TRANSLATIONAL_PROTEIN_MODIFICATION |
| 4:114032570 | <i>CAMK2D</i>       | REACTOME_POST_TRANSLATIONAL_PROTEIN_MODIFICATION |
| 4:114067233 | <i>CAMK2D</i>       | REACTOME_POST_TRANSLATIONAL_PROTEIN_MODIFICATION |
| 4:114077386 | <i>CAMK2D</i>       | REACTOME_POST_TRANSLATIONAL_PROTEIN_MODIFICATION |
| 4:114113772 | <i>CAMK2D</i>       | REACTOME_POST_TRANSLATIONAL_PROTEIN_MODIFICATION |
| 4:114122398 | <i>CAMK2D</i>       | REACTOME_POST_TRANSLATIONAL_PROTEIN_MODIFICATION |
| 4:114172749 | <i>CAMK2D</i>       | REACTOME_POST_TRANSLATIONAL_PROTEIN_MODIFICATION |
| 4:114217997 | <i>CAMK2D</i>       | REACTOME_POST_TRANSLATIONAL_PROTEIN_MODIFICATION |
| 4:114899005 | <i>CAMK2D</i>       | REACTOME_POST_TRANSLATIONAL_PROTEIN_MODIFICATION |
| 5:133710339 | <i>C5orf24</i>      | REACTOME_POST_TRANSLATIONAL_PROTEIN_MODIFICATION |
| 6:32151443  | <i>HLA-DRB5</i>     | REACTOME_POST_TRANSLATIONAL_PROTEIN_MODIFICATION |

|              |                     |                                                  |
|--------------|---------------------|--------------------------------------------------|
| 6:33287183   | <i>HLA-DRB5</i>     | REACTOME_POST_TRANSLATIONAL_PROTEIN_MODIFICATION |
| 6:133025715  | <i>RPS12</i>        | REACTOME_POST_TRANSLATIONAL_PROTEIN_MODIFICATION |
| 6:133028870  | <i>RPS12</i>        | REACTOME_POST_TRANSLATIONAL_PROTEIN_MODIFICATION |
| 6:133075265  | <i>RPS12</i>        | REACTOME_POST_TRANSLATIONAL_PROTEIN_MODIFICATION |
| 7:66096028   | <i>GS1-124K5.11</i> | REACTOME_POST_TRANSLATIONAL_PROTEIN_MODIFICATION |
| 7:66136281   | <i>GS1-124K5.11</i> | REACTOME_POST_TRANSLATIONAL_PROTEIN_MODIFICATION |
| 9:18502815   | <i>SH3GL2_2</i>     | REACTOME_POST_TRANSLATIONAL_PROTEIN_MODIFICATION |
| 9:18522254   | <i>SH3GL2_2</i>     | REACTOME_POST_TRANSLATIONAL_PROTEIN_MODIFICATION |
| 9:18583014   | <i>SH3GL2_2</i>     | REACTOME_POST_TRANSLATIONAL_PROTEIN_MODIFICATION |
| 9:18623302   | <i>SH3GL2_2</i>     | REACTOME_POST_TRANSLATIONAL_PROTEIN_MODIFICATION |
| 9:18633417   | <i>SH3GL2_2</i>     | REACTOME_POST_TRANSLATIONAL_PROTEIN_MODIFICATION |
| 9:18663540   | <i>SH3GL2_2</i>     | REACTOME_POST_TRANSLATIONAL_PROTEIN_MODIFICATION |
| 9:18721847   | <i>SH3GL2_2</i>     | REACTOME_POST_TRANSLATIONAL_PROTEIN_MODIFICATION |
| 9:18725820   | <i>SH3GL2_2</i>     | REACTOME_POST_TRANSLATIONAL_PROTEIN_MODIFICATION |
| 9:33845203   | <i>UBAP2</i>        | REACTOME_POST_TRANSLATIONAL_PROTEIN_MODIFICATION |
| 10:103185542 | <i>GBF1</i>         | REACTOME_POST_TRANSLATIONAL_PROTEIN_MODIFICATION |
| 10:103305087 | <i>GBF1</i>         | REACTOME_POST_TRANSLATIONAL_PROTEIN_MODIFICATION |
| 10:103308244 | <i>GBF1</i>         | REACTOME_POST_TRANSLATIONAL_PROTEIN_MODIFICATION |
| 10:104005410 | <i>GBF1</i>         | REACTOME_POST_TRANSLATIONAL_PROTEIN_MODIFICATION |
| 10:104034550 | <i>GBF1</i>         | REACTOME_POST_TRANSLATIONAL_PROTEIN_MODIFICATION |
| 10:104258303 | <i>GBF1</i>         | REACTOME_POST_TRANSLATIONAL_PROTEIN_MODIFICATION |
| 10:121669571 | <i>INPP5F</i>       | REACTOME_POST_TRANSLATIONAL_PROTEIN_MODIFICATION |
| 10:121683206 | <i>INPP5F</i>       | REACTOME_POST_TRANSLATIONAL_PROTEIN_MODIFICATION |
| 10:121686714 | <i>INPP5F</i>       | REACTOME_POST_TRANSLATIONAL_PROTEIN_MODIFICATION |
| 10:121689030 | <i>INPP5F</i>       | REACTOME_POST_TRANSLATIONAL_PROTEIN_MODIFICATION |
| 11:11299050  | <i>RNF141</i>       | REACTOME_POST_TRANSLATIONAL_PROTEIN_MODIFICATION |
| 11:11316049  | <i>RNF141</i>       | REACTOME_POST_TRANSLATIONAL_PROTEIN_MODIFICATION |
| 11:11364660  | <i>RNF141</i>       | REACTOME_POST_TRANSLATIONAL_PROTEIN_MODIFICATION |
| 11:11399582  | <i>RNF141</i>       | REACTOME_POST_TRANSLATIONAL_PROTEIN_MODIFICATION |
| 11:11412180  | <i>RNF141</i>       | REACTOME_POST_TRANSLATIONAL_PROTEIN_MODIFICATION |
| 11:11494181  | <i>RNF141</i>       | REACTOME_POST_TRANSLATIONAL_PROTEIN_MODIFICATION |
| 11:11504200  | <i>RNF141</i>       | REACTOME_POST_TRANSLATIONAL_PROTEIN_MODIFICATION |
| 11:11508780  | <i>RNF141</i>       | REACTOME_POST_TRANSLATIONAL_PROTEIN_MODIFICATION |
| 11:11519365  | <i>RNF141</i>       | REACTOME_POST_TRANSLATIONAL_PROTEIN_MODIFICATION |
| 11:82719121  | <i>DLG2</i>         | REACTOME_POST_TRANSLATIONAL_PROTEIN_MODIFICATION |
| 11:132796757 | <i>IGSF9B</i>       | REACTOME_POST_TRANSLATIONAL_PROTEIN_MODIFICATION |
| 11:132803872 | <i>IGSF9B</i>       | REACTOME_POST_TRANSLATIONAL_PROTEIN_MODIFICATION |
| 11:132894570 | <i>IGSF9B</i>       | REACTOME_POST_TRANSLATIONAL_PROTEIN_MODIFICATION |
| 11:132905763 | <i>IGSF9B</i>       | REACTOME_POST_TRANSLATIONAL_PROTEIN_MODIFICATION |
| 11:132911017 | <i>IGSF9B</i>       | REACTOME_POST_TRANSLATIONAL_PROTEIN_MODIFICATION |
| 11:132913867 | <i>IGSF9B</i>       | REACTOME_POST_TRANSLATIONAL_PROTEIN_MODIFICATION |
| 11:132920409 | <i>IGSF9B</i>       | REACTOME_POST_TRANSLATIONAL_PROTEIN_MODIFICATION |
| 11:132922730 | <i>IGSF9B</i>       | REACTOME_POST_TRANSLATIONAL_PROTEIN_MODIFICATION |
| 11:132941181 | <i>IGSF9B</i>       | REACTOME_POST_TRANSLATIONAL_PROTEIN_MODIFICATION |
| 11:133012999 | <i>IGSF9B</i>       | REACTOME_POST_TRANSLATIONAL_PROTEIN_MODIFICATION |
| 11:133022507 | <i>IGSF9B</i>       | REACTOME_POST_TRANSLATIONAL_PROTEIN_MODIFICATION |
| 11:133088981 | <i>IGSF9B</i>       | REACTOME_POST_TRANSLATIONAL_PROTEIN_MODIFICATION |
| 11:133095792 | <i>IGSF9B</i>       | REACTOME_POST_TRANSLATIONAL_PROTEIN_MODIFICATION |
| 11:133147495 | <i>IGSF9B</i>       | REACTOME_POST_TRANSLATIONAL_PROTEIN_MODIFICATION |
| 11:133341504 | <i>IGSF9B</i>       | REACTOME_POST_TRANSLATIONAL_PROTEIN_MODIFICATION |
| 12:132687184 | <i>FBRSL1</i>       | REACTOME_POST_TRANSLATIONAL_PROTEIN_MODIFICATION |
| 14:56110265  | <i>GCH1</i>         | REACTOME_POST_TRANSLATIONAL_PROTEIN_MODIFICATION |
| 14:76135546  | <i>RPS6KL1</i>      | REACTOME_POST_TRANSLATIONAL_PROTEIN_MODIFICATION |

|             |                |                                                  |
|-------------|----------------|--------------------------------------------------|
| 14:76159192 | <i>RPS6KL1</i> | REACTOME_POST_TRANSLATIONAL_PROTEIN_MODIFICATION |
| 14:76169229 | <i>RPS6KL1</i> | REACTOME_POST_TRANSLATIONAL_PROTEIN_MODIFICATION |
| 14:76170371 | <i>RPS6KL1</i> | REACTOME_POST_TRANSLATIONAL_PROTEIN_MODIFICATION |
| 14:76244271 | <i>RPS6KL1</i> | REACTOME_POST_TRANSLATIONAL_PROTEIN_MODIFICATION |
| 15:61016235 | <i>VPS13C</i>  | REACTOME_POST_TRANSLATIONAL_PROTEIN_MODIFICATION |
| 15:61065568 | <i>VPS13C</i>  | REACTOME_POST_TRANSLATIONAL_PROTEIN_MODIFICATION |
| 15:61094298 | <i>VPS13C</i>  | REACTOME_POST_TRANSLATIONAL_PROTEIN_MODIFICATION |
| 15:61140736 | <i>VPS13C</i>  | REACTOME_POST_TRANSLATIONAL_PROTEIN_MODIFICATION |
| 15:61142062 | <i>VPS13C</i>  | REACTOME_POST_TRANSLATIONAL_PROTEIN_MODIFICATION |
| 15:61162571 | <i>VPS13C</i>  | REACTOME_POST_TRANSLATIONAL_PROTEIN_MODIFICATION |
| 15:61191617 | <i>VPS13C</i>  | REACTOME_POST_TRANSLATIONAL_PROTEIN_MODIFICATION |
| 15:61195427 | <i>VPS13C</i>  | REACTOME_POST_TRANSLATIONAL_PROTEIN_MODIFICATION |
| 15:61221682 | <i>VPS13C</i>  | REACTOME_POST_TRANSLATIONAL_PROTEIN_MODIFICATION |
| 15:61298486 | <i>VPS13C</i>  | REACTOME_POST_TRANSLATIONAL_PROTEIN_MODIFICATION |
| 15:61375480 | <i>VPS13C</i>  | REACTOME_POST_TRANSLATIONAL_PROTEIN_MODIFICATION |
| 15:61434581 | <i>VPS13C</i>  | REACTOME_POST_TRANSLATIONAL_PROTEIN_MODIFICATION |
| 15:61467078 | <i>VPS13C</i>  | REACTOME_POST_TRANSLATIONAL_PROTEIN_MODIFICATION |
| 15:61470808 | <i>VPS13C</i>  | REACTOME_POST_TRANSLATIONAL_PROTEIN_MODIFICATION |
| 15:61500263 | <i>VPS13C</i>  | REACTOME_POST_TRANSLATIONAL_PROTEIN_MODIFICATION |
| 16:19562008 | <i>SYT17</i>   | REACTOME_POST_TRANSLATIONAL_PROTEIN_MODIFICATION |
| 16:50730088 | <i>CASC16</i>  | REACTOME_POST_TRANSLATIONAL_PROTEIN_MODIFICATION |
| 16:50730446 | <i>CASC16</i>  | REACTOME_POST_TRANSLATIONAL_PROTEIN_MODIFICATION |
| 16:50745926 | <i>CASC16</i>  | REACTOME_POST_TRANSLATIONAL_PROTEIN_MODIFICATION |
| 16:50790891 | <i>CASC16</i>  | REACTOME_POST_TRANSLATIONAL_PROTEIN_MODIFICATION |
| 17:7491546  | <i>V1NB1</i>   | REACTOME_POST_TRANSLATIONAL_PROTEIN_MODIFICATION |
| 17:7578671  | <i>V1NB1</i>   | REACTOME_POST_TRANSLATIONAL_PROTEIN_MODIFICATION |
| 17:44800946 | <i>WNT3</i>    | REACTOME_POST_TRANSLATIONAL_PROTEIN_MODIFICATION |
| 17:44833217 | <i>WNT3</i>    | REACTOME_POST_TRANSLATIONAL_PROTEIN_MODIFICATION |
| 17:45020426 | <i>WNT3</i>    | REACTOME_POST_TRANSLATIONAL_PROTEIN_MODIFICATION |
| 17:45059032 | <i>WNT3</i>    | REACTOME_POST_TRANSLATIONAL_PROTEIN_MODIFICATION |
| 17:45089680 | <i>WNT3</i>    | REACTOME_POST_TRANSLATIONAL_PROTEIN_MODIFICATION |
| 1:154701406 | <i>GBAP1</i>   | REACTOME_POTASSIUM_CHANNELS                      |
| 1:154776412 | <i>GBAP1</i>   | REACTOME_POTASSIUM_CHANNELS                      |
| 1:154801670 | <i>GBAP1</i>   | REACTOME_POTASSIUM_CHANNELS                      |
| 1:154804988 | <i>GBAP1</i>   | REACTOME_POTASSIUM_CHANNELS                      |
| 2:18091890  | <i>KCNS3</i>   | REACTOME_POTASSIUM_CHANNELS                      |
| 2:18130187  | <i>KCNS3</i>   | REACTOME_POTASSIUM_CHANNELS                      |
| 2:18141542  | <i>KCNS3</i>   | REACTOME_POTASSIUM_CHANNELS                      |
| 2:18143082  | <i>KCNS3</i>   | REACTOME_POTASSIUM_CHANNELS                      |
| 2:18176120  | <i>KCNS3</i>   | REACTOME_POTASSIUM_CHANNELS                      |
| 2:18247777  | <i>KCNS3</i>   | REACTOME_POTASSIUM_CHANNELS                      |
| 2:18299564  | <i>KCNS3</i>   | REACTOME_POTASSIUM_CHANNELS                      |
| 2:18315537  | <i>KCNS3</i>   | REACTOME_POTASSIUM_CHANNELS                      |
| 2:18335515  | <i>KCNS3</i>   | REACTOME_POTASSIUM_CHANNELS                      |
| 2:18455049  | <i>KCNS3</i>   | REACTOME_POTASSIUM_CHANNELS                      |
| 2:18472861  | <i>KCNS3</i>   | REACTOME_POTASSIUM_CHANNELS                      |
| 3:19236100  | <i>SATB1</i>   | REACTOME_POTASSIUM_CHANNELS                      |
| 3:19312697  | <i>SATB1</i>   | REACTOME_POTASSIUM_CHANNELS                      |
| 3:19329968  | <i>SATB1</i>   | REACTOME_POTASSIUM_CHANNELS                      |
| 3:19334895  | <i>SATB1</i>   | REACTOME_POTASSIUM_CHANNELS                      |
| 3:19352476  | <i>SATB1</i>   | REACTOME_POTASSIUM_CHANNELS                      |
| 6:29565889  | <i>TRIM40</i>  | REACTOME_POTASSIUM_CHANNELS                      |
| 6:29590715  | <i>TRIM40</i>  | REACTOME_POTASSIUM_CHANNELS                      |

|             |                 |                                                                   |
|-------------|-----------------|-------------------------------------------------------------------|
| 6:73383348  | <i>RIMS1</i>    | REACTOME_POTASSIUM_CHANNELS                                       |
| 6:73448086  | <i>RIMS1</i>    | REACTOME_POTASSIUM_CHANNELS                                       |
| 14:88681675 | <i>GALC</i>     | REACTOME_POTASSIUM_CHANNELS                                       |
| 14:88709038 | <i>GALC</i>     | REACTOME_POTASSIUM_CHANNELS                                       |
| 14:88738350 | <i>GALC</i>     | REACTOME_POTASSIUM_CHANNELS                                       |
| 14:88769689 | <i>GALC</i>     | REACTOME_POTASSIUM_CHANNELS                                       |
| 14:88778263 | <i>GALC</i>     | REACTOME_POTASSIUM_CHANNELS                                       |
| 17:7832034  | <i>V1NB1</i>    | REACTOME_POTASSIUM_CHANNELS                                       |
| 19:2557113  | <i>SPPL2B</i>   | REACTOME_POTASSIUM_CHANNELS                                       |
| 19:2563327  | <i>SPPL2B</i>   | REACTOME_POTASSIUM_CHANNELS                                       |
| 19:2580057  | <i>SPPL2B</i>   | REACTOME_POTASSIUM_CHANNELS                                       |
| 19:2660983  | <i>SPPL2B</i>   | REACTOME_POTASSIUM_CHANNELS                                       |
| 21:38984964 | <i>DYRK1A</i>   | REACTOME_POTASSIUM_CHANNELS                                       |
| 21:39018136 | <i>DYRK1A</i>   | REACTOME_POTASSIUM_CHANNELS                                       |
| 21:39021814 | <i>DYRK1A</i>   | REACTOME_POTASSIUM_CHANNELS                                       |
| 21:39039956 | <i>DYRK1A</i>   | REACTOME_POTASSIUM_CHANNELS                                       |
| 21:39088785 | <i>DYRK1A</i>   | REACTOME_POTASSIUM_CHANNELS                                       |
| 21:39108160 | <i>DYRK1A</i>   | REACTOME_POTASSIUM_CHANNELS                                       |
| 21:39120480 | <i>DYRK1A</i>   | REACTOME_POTASSIUM_CHANNELS                                       |
| 21:39134980 | <i>DYRK1A</i>   | REACTOME_POTASSIUM_CHANNELS                                       |
| 21:39197323 | <i>DYRK1A</i>   | REACTOME_POTASSIUM_CHANNELS                                       |
| 21:39217472 | <i>DYRK1A</i>   | REACTOME_POTASSIUM_CHANNELS                                       |
| 5:133558885 | <i>C5orf24</i>  | REACTOME_PP2A_MEDIATED_DEPHOSPHORYLATION_OF_KEY_METABOLIC_FACTORS |
| 6:33381459  | <i>HLA-DRB5</i> | REACTOME_PRC2_METHYLATES_HISTONES_AND_DNA                         |
| 6:32179319  | <i>HLA-DRB5</i> | REACTOME_PRE_NOTCH_EXPRESSION_AND_PROCESSING                      |
| 6:32186193  | <i>HLA-DRB5</i> | REACTOME_PRE_NOTCH_EXPRESSION_AND_PROCESSING                      |
| 17:7578671  | <i>V1NB1</i>    | REACTOME_PRE_NOTCH_EXPRESSION_AND_PROCESSING                      |
| 6:32179319  | <i>HLA-DRB5</i> | REACTOME_PRE_NOTCH_PROCESSING_IN_GOLGI                            |
| 6:32186193  | <i>HLA-DRB5</i> | REACTOME_PRE_NOTCH_PROCESSING_IN_GOLGI                            |
| 6:32179319  | <i>HLA-DRB5</i> | REACTOME_PRE_NOTCH_PROCESSING_IN_THE_ENDOPLASMIC_RETICULUM        |
| 6:32186193  | <i>HLA-DRB5</i> | REACTOME_PRE_NOTCH_PROCESSING_IN_THE_ENDOPLASMIC_RETICULUM        |
| 19:2557113  | <i>SPPL2B</i>   | REACTOME_PRESYNAPTIC_FUNCTION_OF_KAINATE_RECEPTORS                |
| 19:2563327  | <i>SPPL2B</i>   | REACTOME_PRESYNAPTIC_FUNCTION_OF_KAINATE_RECEPTORS                |
| 19:2580057  | <i>SPPL2B</i>   | REACTOME_PRESYNAPTIC_FUNCTION_OF_KAINATE_RECEPTORS                |
| 19:2660983  | <i>SPPL2B</i>   | REACTOME_PRESYNAPTIC_FUNCTION_OF_KAINATE_RECEPTORS                |
| 5:134132269 | <i>C5orf24</i>  | REACTOME_PROCESSING_OF_CAPPED_INTRON_CONTAINING_PRE_MRNA          |
| 6:30628082  | <i>TRIM40</i>   | REACTOME_PROCESSING_OF_CAPPED_INTRON_CONTAINING_PRE_MRNA          |
| 6:30631063  | <i>TRIM40</i>   | REACTOME_PROCESSING_OF_CAPPED_INTRON_CONTAINING_PRE_MRNA          |
| 6:30639369  | <i>TRIM40</i>   | REACTOME_PROCESSING_OF_CAPPED_INTRON_CONTAINING_PRE_MRNA          |
| 17:42929985 | <i>CRHR1_2</i>  | REACTOME_PROCESSING_OF_CAPPED_INTRON_CONTAINING_PRE_MRNA          |
| 17:59791813 | <i>BRIP1</i>    | REACTOME_PROCESSING_OF_DNA_DOUBLE_STRAND_BREAK_ENDS               |
| 17:59922925 | <i>BRIP1</i>    | REACTOME_PROCESSING_OF_DNA_DOUBLE_STRAND_BREAK_ENDS               |
| 8:16929685  | <i>FGF20</i>    | REACTOME_PROCESSING_OF_SMDT1                                      |
| 8:16967392  | <i>FGF20</i>    | REACTOME_PROCESSING_OF_SMDT1                                      |
| 8:16971257  | <i>FGF20</i>    | REACTOME_PROCESSING_OF_SMDT1                                      |
| 1:156059276 | <i>GBAP1</i>    | REACTOME_PROGRAMMED_CELL_DEATH                                    |
| 3:18395010  | <i>SATB1</i>    | REACTOME_PROGRAMMED_CELL_DEATH                                    |
| 3:18472577  | <i>SATB1</i>    | REACTOME_PROGRAMMED_CELL_DEATH                                    |
| 3:122200170 | <i>KPNA1</i>    | REACTOME_PROGRAMMED_CELL_DEATH                                    |
| 8:23050400  | <i>BIN3</i>     | REACTOME_PROGRAMMED_CELL_DEATH                                    |
| 17:7578671  | <i>V1NB1</i>    | REACTOME_PROGRAMMED_CELL_DEATH                                    |
| 17:43181287 | <i>CRHR1_2</i>  | REACTOME_PROGRAMMED_CELL_DEATH                                    |
| 17:43184627 | <i>CRHR1_2</i>  | REACTOME_PROGRAMMED_CELL_DEATH                                    |

|              |                 |                                                                |
|--------------|-----------------|----------------------------------------------------------------|
| 17:43999203  | <i>WNT3</i>     | REACTOME_PROGRAMMED_CELL_DEATH                                 |
| 17:44005297  | <i>WNT3</i>     | REACTOME_PROGRAMMED_CELL_DEATH                                 |
| 17:44019712  | <i>WNT3</i>     | REACTOME_PROGRAMMED_CELL_DEATH                                 |
| 17:44060492  | <i>WNT3</i>     | REACTOME_PROGRAMMED_CELL_DEATH                                 |
| 17:44065263  | <i>WNT3</i>     | REACTOME_PROGRAMMED_CELL_DEATH                                 |
| 17:44081178  | <i>WNT3</i>     | REACTOME_PROGRAMMED_CELL_DEATH                                 |
| 17:44083297  | <i>WNT3</i>     | REACTOME_PROGRAMMED_CELL_DEATH                                 |
| 10:103185542 | <i>GBF1</i>     | REACTOME_PROLACTIN_RECEPTOR_SIGNALING                          |
| 10:103305087 | <i>GBF1</i>     | REACTOME_PROLACTIN_RECEPTOR_SIGNALING                          |
| 10:103308244 | <i>GBF1</i>     | REACTOME_PROLACTIN_RECEPTOR_SIGNALING                          |
| 17:40392358  | <i>RETREG3</i>  | REACTOME_PROLACTIN_RECEPTOR_SIGNALING                          |
| 19:2557113   | <i>SPPL2B</i>   | REACTOME_PROSTACYCLIN_SIGNALLING_THROUGH_PROSTACYCLIN_RECEPTOR |
| 19:2563327   | <i>SPPL2B</i>   | REACTOME_PROSTACYCLIN_SIGNALLING_THROUGH_PROSTACYCLIN_RECEPTOR |
| 19:2580057   | <i>SPPL2B</i>   | REACTOME_PROSTACYCLIN_SIGNALLING_THROUGH_PROSTACYCLIN_RECEPTOR |
| 19:2660983   | <i>SPPL2B</i>   | REACTOME_PROSTACYCLIN_SIGNALLING_THROUGH_PROSTACYCLIN_RECEPTOR |
| 1:155205634  | <i>GBAP1</i>    | REACTOME_PROTEIN_FOLDING                                       |
| 4:15608677   | <i>BST1</i>     | REACTOME_PROTEIN_FOLDING                                       |
| 4:15618898   | <i>BST1</i>     | REACTOME_PROTEIN_FOLDING                                       |
| 19:2557113   | <i>SPPL2B</i>   | REACTOME_PROTEIN_FOLDING                                       |
| 19:2563327   | <i>SPPL2B</i>   | REACTOME_PROTEIN_FOLDING                                       |
| 19:2580057   | <i>SPPL2B</i>   | REACTOME_PROTEIN_FOLDING                                       |
| 19:2660983   | <i>SPPL2B</i>   | REACTOME_PROTEIN_FOLDING                                       |
| 1:155181232  | <i>GBAP1</i>    | REACTOME_PROTEIN_LOCALIZATION                                  |
| 3:150298317  | <i>MED12L</i>   | REACTOME_PROTEIN_LOCALIZATION                                  |
| 3:150303590  | <i>MED12L</i>   | REACTOME_PROTEIN_LOCALIZATION                                  |
| 6:31607942   | <i>HLA-DRB5</i> | REACTOME_PROTEIN_LOCALIZATION                                  |
| 12:39960237  | <i>LRRK2_2</i>  | REACTOME_PROTEIN_LOCALIZATION                                  |
| 12:133295501 | <i>FBRSL1</i>   | REACTOME_PROTEIN_LOCALIZATION                                  |
| 19:2771641   | <i>SPPL2B</i>   | REACTOME_PROTEIN_LOCALIZATION                                  |
| 11:83219006  | <i>DLG2</i>     | REACTOME_PROTEIN_PROTEIN_INTERACTIONS_AT_SYNAPSES              |
| 11:83232915  | <i>DLG2</i>     | REACTOME_PROTEIN_PROTEIN_INTERACTIONS_AT_SYNAPSES              |
| 11:83282740  | <i>DLG2</i>     | REACTOME_PROTEIN_PROTEIN_INTERACTIONS_AT_SYNAPSES              |
| 11:83387273  | <i>DLG2</i>     | REACTOME_PROTEIN_PROTEIN_INTERACTIONS_AT_SYNAPSES              |
| 11:83538733  | <i>DLG2</i>     | REACTOME_PROTEIN_PROTEIN_INTERACTIONS_AT_SYNAPSES              |
| 11:83544472  | <i>DLG2</i>     | REACTOME_PROTEIN_PROTEIN_INTERACTIONS_AT_SYNAPSES              |
| 11:83578152  | <i>DLG2</i>     | REACTOME_PROTEIN_PROTEIN_INTERACTIONS_AT_SYNAPSES              |
| 11:83647657  | <i>DLG2</i>     | REACTOME_PROTEIN_PROTEIN_INTERACTIONS_AT_SYNAPSES              |
| 11:83669903  | <i>DLG2</i>     | REACTOME_PROTEIN_PROTEIN_INTERACTIONS_AT_SYNAPSES              |
| 11:83736246  | <i>DLG2</i>     | REACTOME_PROTEIN_PROTEIN_INTERACTIONS_AT_SYNAPSES              |
| 11:83762918  | <i>DLG2</i>     | REACTOME_PROTEIN_PROTEIN_INTERACTIONS_AT_SYNAPSES              |
| 11:83823752  | <i>DLG2</i>     | REACTOME_PROTEIN_PROTEIN_INTERACTIONS_AT_SYNAPSES              |
| 11:83839992  | <i>DLG2</i>     | REACTOME_PROTEIN_PROTEIN_INTERACTIONS_AT_SYNAPSES              |
| 11:84104763  | <i>DLG2</i>     | REACTOME_PROTEIN_PROTEIN_INTERACTIONS_AT_SYNAPSES              |
| 11:84169039  | <i>DLG2</i>     | REACTOME_PROTEIN_PROTEIN_INTERACTIONS_AT_SYNAPSES              |
| 11:84221628  | <i>DLG2</i>     | REACTOME_PROTEIN_PROTEIN_INTERACTIONS_AT_SYNAPSES              |
| 11:84312008  | <i>DLG2</i>     | REACTOME_PROTEIN_PROTEIN_INTERACTIONS_AT_SYNAPSES              |
| 11:84324361  | <i>DLG2</i>     | REACTOME_PROTEIN_PROTEIN_INTERACTIONS_AT_SYNAPSES              |
| 11:84360346  | <i>DLG2</i>     | REACTOME_PROTEIN_PROTEIN_INTERACTIONS_AT_SYNAPSES              |
| 11:84403409  | <i>DLG2</i>     | REACTOME_PROTEIN_PROTEIN_INTERACTIONS_AT_SYNAPSES              |
| 17:7101771   | <i>V1NB1</i>    | REACTOME_PROTEIN_PROTEIN_INTERACTIONS_AT_SYNAPSES              |
| 5:133710339  | <i>C5orf24</i>  | REACTOME_PROTEIN_UBIQUITINATION                                |
| 9:33845203   | <i>UBAP2</i>    | REACTOME_PROTEIN_UBIQUITINATION                                |
| 17:7578671   | <i>V1NB1</i>    | REACTOME_PTEN_REGULATION                                       |

|              |                |                                                                   |
|--------------|----------------|-------------------------------------------------------------------|
| 7:23277372   | <i>GPNUMB</i>  | REACTOME_PTK6_PROMOTES_HIF1A_STABILIZATION                        |
| 7:23282960   | <i>GPNUMB</i>  | REACTOME_PTK6_PROMOTES_HIF1A_STABILIZATION                        |
| 7:23293746   | <i>GPNUMB</i>  | REACTOME_PTK6_PROMOTES_HIF1A_STABILIZATION                        |
| 7:23313171   | <i>GPNUMB</i>  | REACTOME_PTK6_PROMOTES_HIF1A_STABILIZATION                        |
| 12:40614434  | <i>LRRK2_2</i> | REACTOME_PTK6_PROMOTES_HIF1A_STABILIZATION                        |
| 12:40614656  | <i>LRRK2_2</i> | REACTOME_PTK6_PROMOTES_HIF1A_STABILIZATION                        |
| 12:40617231  | <i>LRRK2_2</i> | REACTOME_PTK6_PROMOTES_HIF1A_STABILIZATION                        |
| 12:40653993  | <i>LRRK2_2</i> | REACTOME_PTK6_PROMOTES_HIF1A_STABILIZATION                        |
| 12:40698422  | <i>LRRK2_2</i> | REACTOME_PTK6_PROMOTES_HIF1A_STABILIZATION                        |
| 12:40707861  | <i>LRRK2_2</i> | REACTOME_PTK6_PROMOTES_HIF1A_STABILIZATION                        |
| 12:40734202  | <i>LRRK2_2</i> | REACTOME_PTK6_PROMOTES_HIF1A_STABILIZATION                        |
| 12:40753796  | <i>LRRK2_2</i> | REACTOME_PTK6_PROMOTES_HIF1A_STABILIZATION                        |
| 3:49406095   | <i>IP6K2</i>   | REACTOME_PTK6_REGULATES_RHO_GTPASES_RAS_GTPASE_AND_MAP_KINASES    |
| 3:49424231   | <i>IP6K2</i>   | REACTOME_PTK6_REGULATES_RHO_GTPASES_RAS_GTPASE_AND_MAP_KINASES    |
| 3:49450137   | <i>IP6K2</i>   | REACTOME_PTK6_REGULATES_RHO_GTPASES_RAS_GTPASE_AND_MAP_KINASES    |
| 10:104847713 | <i>GBF1</i>    | REACTOME_PURINE_CATABOLISM                                        |
| 10:104861736 | <i>GBF1</i>    | REACTOME_PURINE_CATABOLISM                                        |
| 10:104926485 | <i>GBF1</i>    | REACTOME_PURINE_CATABOLISM                                        |
| 10:104929716 | <i>GBF1</i>    | REACTOME_PURINE_CATABOLISM                                        |
| 11:10392432  | <i>RNF141</i>  | REACTOME_PURINE_SALVAGE                                           |
| 11:10429998  | <i>RNF141</i>  | REACTOME_PURINE_SALVAGE                                           |
| 11:10458098  | <i>RNF141</i>  | REACTOME_PURINE_SALVAGE                                           |
| 11:10471738  | <i>RNF141</i>  | REACTOME_PURINE_SALVAGE                                           |
| 11:10487997  | <i>RNF141</i>  | REACTOME_PURINE_SALVAGE                                           |
| 11:10494132  | <i>RNF141</i>  | REACTOME_PURINE_SALVAGE                                           |
| 17:76177567  | <i>DNAH17</i>  | REACTOME_PYRIMIDINE_SALVAGE                                       |
| 2:135921205  | <i>TMEM163</i> | REACTOME_RAB_GEF5_EXCHANGE_GTP_FOR_GDP_ON_RABS                    |
| 1:156037357  | <i>GBAP1</i>   | REACTOME_RAB_GERANYLGERANYLATION                                  |
| 11:82719121  | <i>DLG2</i>    | REACTOME_RAB_GERANYLGERANYLATION                                  |
| 2:135921205  | <i>TMEM163</i> | REACTOME_RAB_REGULATION_OF_TRAFFICKING                            |
| 4:114424939  | <i>CAMK2D</i>  | REACTOME_RAF_ACTIVATION                                           |
| 4:114494052  | <i>CAMK2D</i>  | REACTOME_RAF_ACTIVATION                                           |
| 4:114529492  | <i>CAMK2D</i>  | REACTOME_RAF_ACTIVATION                                           |
| 4:114539964  | <i>CAMK2D</i>  | REACTOME_RAF_ACTIVATION                                           |
| 4:114597918  | <i>CAMK2D</i>  | REACTOME_RAF_ACTIVATION                                           |
| 5:133558885  | <i>C5orf24</i> | REACTOME_RAF_ACTIVATION                                           |
| 4:114424939  | <i>CAMK2D</i>  | REACTOME_RAS_ACTIVATION_UPON_CA2PLUS_INFLUX_THROUGH_NMDA_RECEPTOR |
| 4:114494052  | <i>CAMK2D</i>  | REACTOME_RAS_ACTIVATION_UPON_CA2PLUS_INFLUX_THROUGH_NMDA_RECEPTOR |
| 4:114529492  | <i>CAMK2D</i>  | REACTOME_RAS_ACTIVATION_UPON_CA2PLUS_INFLUX_THROUGH_NMDA_RECEPTOR |
| 4:114539964  | <i>CAMK2D</i>  | REACTOME_RAS_ACTIVATION_UPON_CA2PLUS_INFLUX_THROUGH_NMDA_RECEPTOR |
| 4:114597918  | <i>CAMK2D</i>  | REACTOME_RAS_ACTIVATION_UPON_CA2PLUS_INFLUX_THROUGH_NMDA_RECEPTOR |
| 11:83219006  | <i>DLG2</i>    | REACTOME_RAS_ACTIVATION_UPON_CA2PLUS_INFLUX_THROUGH_NMDA_RECEPTOR |
| 11:83232915  | <i>DLG2</i>    | REACTOME_RAS_ACTIVATION_UPON_CA2PLUS_INFLUX_THROUGH_NMDA_RECEPTOR |
| 11:83282740  | <i>DLG2</i>    | REACTOME_RAS_ACTIVATION_UPON_CA2PLUS_INFLUX_THROUGH_NMDA_RECEPTOR |
| 11:83387273  | <i>DLG2</i>    | REACTOME_RAS_ACTIVATION_UPON_CA2PLUS_INFLUX_THROUGH_NMDA_RECEPTOR |
| 11:83538733  | <i>DLG2</i>    | REACTOME_RAS_ACTIVATION_UPON_CA2PLUS_INFLUX_THROUGH_NMDA_RECEPTOR |
| 11:83544472  | <i>DLG2</i>    | REACTOME_RAS_ACTIVATION_UPON_CA2PLUS_INFLUX_THROUGH_NMDA_RECEPTOR |
| 11:83578152  | <i>DLG2</i>    | REACTOME_RAS_ACTIVATION_UPON_CA2PLUS_INFLUX_THROUGH_NMDA_RECEPTOR |
| 11:83647657  | <i>DLG2</i>    | REACTOME_RAS_ACTIVATION_UPON_CA2PLUS_INFLUX_THROUGH_NMDA_RECEPTOR |
| 11:83669903  | <i>DLG2</i>    | REACTOME_RAS_ACTIVATION_UPON_CA2PLUS_INFLUX_THROUGH_NMDA_RECEPTOR |
| 11:83736246  | <i>DLG2</i>    | REACTOME_RAS_ACTIVATION_UPON_CA2PLUS_INFLUX_THROUGH_NMDA_RECEPTOR |
| 11:83762918  | <i>DLG2</i>    | REACTOME_RAS_ACTIVATION_UPON_CA2PLUS_INFLUX_THROUGH_NMDA_RECEPTOR |
| 11:83823752  | <i>DLG2</i>    | REACTOME_RAS_ACTIVATION_UPON_CA2PLUS_INFLUX_THROUGH_NMDA_RECEPTOR |

|              |                 |                                                                                                         |
|--------------|-----------------|---------------------------------------------------------------------------------------------------------|
| 11:83839992  | <i>DLG2</i>     | REACTOME_RAS_ACTIVATION_UPON_CA2PLUS_INFLUX_THROUGH_NMDA_RECEPTOR                                       |
| 11:84104763  | <i>DLG2</i>     | REACTOME_RAS_ACTIVATION_UPON_CA2PLUS_INFLUX_THROUGH_NMDA_RECEPTOR                                       |
| 11:84169039  | <i>DLG2</i>     | REACTOME_RAS_ACTIVATION_UPON_CA2PLUS_INFLUX_THROUGH_NMDA_RECEPTOR                                       |
| 11:84221628  | <i>DLG2</i>     | REACTOME_RAS_ACTIVATION_UPON_CA2PLUS_INFLUX_THROUGH_NMDA_RECEPTOR                                       |
| 11:84312008  | <i>DLG2</i>     | REACTOME_RAS_ACTIVATION_UPON_CA2PLUS_INFLUX_THROUGH_NMDA_RECEPTOR                                       |
| 11:84324361  | <i>DLG2</i>     | REACTOME_RAS_ACTIVATION_UPON_CA2PLUS_INFLUX_THROUGH_NMDA_RECEPTOR                                       |
| 11:84360346  | <i>DLG2</i>     | REACTOME_RAS_ACTIVATION_UPON_CA2PLUS_INFLUX_THROUGH_NMDA_RECEPTOR                                       |
| 11:84403409  | <i>DLG2</i>     | REACTOME_RAS_ACTIVATION_UPON_CA2PLUS_INFLUX_THROUGH_NMDA_RECEPTOR                                       |
| 17:7101771   | <i>V1NB1</i>    | REACTOME_RAS_ACTIVATION_UPON_CA2PLUS_INFLUX_THROUGH_NMDA_RECEPTOR                                       |
| 12:133295501 | <i>FBRSL1</i>   | REACTOME_RECEPTOR_MEDIATED_MITOPHAGY                                                                    |
| 5:133710339  | <i>C5orf24</i>  | REACTOME_RECOGNITION_OF_DNA_DAMAGE_BY_PCNA_CONTAINING_REPLICATION_COMPLEX                               |
| 12:133206648 | <i>FBRSL1</i>   | REACTOME_RECOGNITION_OF_DNA_DAMAGE_BY_PCNA_CONTAINING_REPLICATION_COMPLEX                               |
| 12:133223685 | <i>FBRSL1</i>   | REACTOME_RECOGNITION_OF_DNA_DAMAGE_BY_PCNA_CONTAINING_REPLICATION_COMPLEX                               |
| 10:104258303 | <i>GBF1</i>     | REACTOME_RECRUITMENT_OF_NUMA_TO_MITOTIC_CENTROSOMES                                                     |
| 16:19562008  | <i>SYT17</i>    | REACTOME_RECRUITMENT_OF_NUMA_TO_MITOTIC_CENTROSOMES                                                     |
| 17:40818584  | <i>RETREG3</i>  | REACTOME_RECRUITMENT_OF_NUMA_TO_MITOTIC_CENTROSOMES                                                     |
| 1:171837985  | <i>VAMP4</i>    | REACTOME_RECYCLING_PATHWAY_OF_L1                                                                        |
| 1:171945488  | <i>VAMP4</i>    | REACTOME_RECYCLING_PATHWAY_OF_L1                                                                        |
| 1:172137119  | <i>VAMP4</i>    | REACTOME_RECYCLING_PATHWAY_OF_L1                                                                        |
| 1:172386261  | <i>VAMP4</i>    | REACTOME_RECYCLING_PATHWAY_OF_L1                                                                        |
| 9:17579690   | <i>SH3GL2_2</i> | REACTOME_RECYCLING_PATHWAY_OF_L1                                                                        |
| 9:17587160   | <i>SH3GL2_2</i> | REACTOME_RECYCLING_PATHWAY_OF_L1                                                                        |
| 9:17609302   | <i>SH3GL2_2</i> | REACTOME_RECYCLING_PATHWAY_OF_L1                                                                        |
| 9:17626762   | <i>SH3GL2_2</i> | REACTOME_RECYCLING_PATHWAY_OF_L1                                                                        |
| 9:17627444   | <i>SH3GL2_2</i> | REACTOME_RECYCLING_PATHWAY_OF_L1                                                                        |
| 9:17642664   | <i>SH3GL2_2</i> | REACTOME_RECYCLING_PATHWAY_OF_L1                                                                        |
| 9:17710876   | <i>SH3GL2_2</i> | REACTOME_RECYCLING_PATHWAY_OF_L1                                                                        |
| 9:17732590   | <i>SH3GL2_2</i> | REACTOME_RECYCLING_PATHWAY_OF_L1                                                                        |
| 9:17737514   | <i>SH3GL2_2</i> | REACTOME_RECYCLING_PATHWAY_OF_L1                                                                        |
| 9:17758945   | <i>SH3GL2_2</i> | REACTOME_RECYCLING_PATHWAY_OF_L1                                                                        |
| 6:112137847  | <i>FYN</i>      | REACTOME_REELIN_SIGNALLING_PATHWAY                                                                      |
| 6:112151452  | <i>FYN</i>      | REACTOME_REELIN_SIGNALLING_PATHWAY                                                                      |
| 6:112175069  | <i>FYN</i>      | REACTOME_REELIN_SIGNALLING_PATHWAY                                                                      |
| 8:23050400   | <i>BIN3</i>     | REACTOME_REGULATED_NECROSIS                                                                             |
| 1:227067656  | <i>ITPKB</i>    | REACTOME_REGULATED_PROTEOLYSIS_OF_P75NTR                                                                |
| 8:23050400   | <i>BIN3</i>     | REACTOME_REGULATION_BY_C_FLIP                                                                           |
| 8:11679472   | <i>CTSB</i>     | REACTOME_REGULATION_OF_CHOLESTEROL_BIOSYNTHESIS_BY_SREBP_SREBF                                          |
| 3:49561208   | <i>IP6K2</i>    | REACTOME_REGULATION_OF_EXPRESSION_OF_SLITS_AND_ROBOS                                                    |
| 5:133558885  | <i>C5orf24</i>  | REACTOME_REGULATION_OF_GLYCOLYSIS_BY_FRUCTOSE_2_6_BISPHOSPHATE_METABOLISM                               |
| 10:14908849  | <i>ITGA8</i>    | REACTOME_REGULATION_OF_HSF1_MEDIATED_HEAT_SHOCK_RESPONSE                                                |
| 10:121429633 | <i>INPP5F</i>   | REACTOME_REGULATION_OF_HSF1_MEDIATED_HEAT_SHOCK_RESPONSE                                                |
| 10:121437329 | <i>INPP5F</i>   | REACTOME_REGULATION_OF_HSF1_MEDIATED_HEAT_SHOCK_RESPONSE                                                |
| 17:40132591  | <i>RETREG3</i>  | REACTOME_REGULATION_OF_HSF1_MEDIATED_HEAT_SHOCK_RESPONSE                                                |
| 3:49162284   | <i>IP6K2</i>    | REGULATION_OF_INSULIN_LIKE_GROWTH_FACTOR_IGF_TRANSPORT_AND_UPTAKE_BY_INSULIN_LIKE_GROWTH_FACTOR_BINDING |
| 3:49162583   | <i>IP6K2</i>    | REGULATION_OF_INSULIN_LIKE_GROWTH_FACTOR_IGF_TRANSPORT_AND_UPTAKE_BY_INSULIN_LIKE_GROWTH_FACTOR_BINDING |
| 14:56110265  | <i>GCH1</i>     | REGULATION_OF_INSULIN_LIKE_GROWTH_FACTOR_IGF_TRANSPORT_AND_UPTAKE_BY_INSULIN_LIKE_GROWTH_FACTOR_BINDING |
| 2:18091890   | <i>KCNS3</i>    | REACTOME_REGULATION_OF_INSULIN_SECRETION                                                                |
| 2:18130187   | <i>KCNS3</i>    | REACTOME_REGULATION_OF_INSULIN_SECRETION                                                                |
| 2:18141542   | <i>KCNS3</i>    | REACTOME_REGULATION_OF_INSULIN_SECRETION                                                                |
| 2:18143082   | <i>KCNS3</i>    | REACTOME_REGULATION_OF_INSULIN_SECRETION                                                                |
| 2:18176120   | <i>KCNS3</i>    | REACTOME_REGULATION_OF_INSULIN_SECRETION                                                                |
| 2:18247777   | <i>KCNS3</i>    | REACTOME_REGULATION_OF_INSULIN_SECRETION                                                                |
| 2:18299564   | <i>KCNS3</i>    | REACTOME_REGULATION_OF_INSULIN_SECRETION                                                                |

|              |        |                                                                                                    |
|--------------|--------|----------------------------------------------------------------------------------------------------|
| 2:18315537   | KCNS3  | REACTOME_REGULATION_OF_INSULIN_SECRETION                                                           |
| 2:18335515   | KCNS3  | REACTOME_REGULATION_OF_INSULIN_SECRETION                                                           |
| 2:18455049   | KCNS3  | REACTOME_REGULATION_OF_INSULIN_SECRETION                                                           |
| 2:18472861   | KCNS3  | REACTOME_REGULATION_OF_INSULIN_SECRETION                                                           |
| 3:48835245   | IP6K2  | REACTOME_REGULATION_OF_INSULIN_SECRETION                                                           |
| 3:123089448  | KPNA1  | REACTOME_REGULATION_OF_INSULIN_SECRETION                                                           |
| 8:131799767  | FAM49B | REACTOME_REGULATION_OF_INSULIN_SECRETION                                                           |
| 8:131845512  | FAM49B | REACTOME_REGULATION_OF_INSULIN_SECRETION                                                           |
| 8:131865425  | FAM49B | REACTOME_REGULATION_OF_INSULIN_SECRETION                                                           |
| 8:131901170  | FAM49B | REACTOME_REGULATION_OF_INSULIN_SECRETION                                                           |
| 19:2557113   | SPPL2B | REACTOME_REGULATION_OF_INSULIN_SECRETION                                                           |
| 19:2563327   | SPPL2B | REACTOME_REGULATION_OF_INSULIN_SECRETION                                                           |
| 19:2580057   | SPPL2B | REACTOME_REGULATION_OF_INSULIN_SECRETION                                                           |
| 19:2660983   | SPPL2B | REACTOME_REGULATION_OF_INSULIN_SECRETION                                                           |
| 19:3142784   | SPPL2B | REACTOME_REGULATION_OF_INSULIN_SECRETION                                                           |
| 19:3147326   | SPPL2B | REACTOME_REGULATION_OF_INSULIN_SECRETION                                                           |
| 6:112137847  | FYN    | REACTOME_REGULATION_OF_KIT_SIGNALING                                                               |
| 6:112151452  | FYN    | REACTOME_REGULATION_OF_KIT_SIGNALING                                                               |
| 6:112175069  | FYN    | REACTOME_REGULATION_OF_KIT_SIGNALING                                                               |
| 2:101439596  | MAP4K4 | EACTOME_REGULATION_OF_LIPID_METABOLISM_BY_PEROXISOME_PROLIFERATOR_ACTIVATED_RECEPTOR_ALPHA_PPARALP |
| 2:101464631  | MAP4K4 | EACTOME_REGULATION_OF_LIPID_METABOLISM_BY_PEROXISOME_PROLIFERATOR_ACTIVATED_RECEPTOR_ALPHA_PPARALP |
| 2:101547064  | MAP4K4 | EACTOME_REGULATION_OF_LIPID_METABOLISM_BY_PEROXISOME_PROLIFERATOR_ACTIVATED_RECEPTOR_ALPHA_PPARALP |
| 2:101550181  | MAP4K4 | EACTOME_REGULATION_OF_LIPID_METABOLISM_BY_PEROXISOME_PROLIFERATOR_ACTIVATED_RECEPTOR_ALPHA_PPARALP |
| 2:101578010  | MAP4K4 | EACTOME_REGULATION_OF_LIPID_METABOLISM_BY_PEROXISOME_PROLIFERATOR_ACTIVATED_RECEPTOR_ALPHA_PPARALP |
| 2:101603812  | MAP4K4 | EACTOME_REGULATION_OF_LIPID_METABOLISM_BY_PEROXISOME_PROLIFERATOR_ACTIVATED_RECEPTOR_ALPHA_PPARALP |
| 4:17622910   | LCORL  | EACTOME_REGULATION_OF_LIPID_METABOLISM_BY_PEROXISOME_PROLIFERATOR_ACTIVATED_RECEPTOR_ALPHA_PPARALP |
| 8:11679472   | CTSB   | EACTOME_REGULATION_OF_LIPID_METABOLISM_BY_PEROXISOME_PROLIFERATOR_ACTIVATED_RECEPTOR_ALPHA_PPARALP |
| 15:61016235  | VPS13C | EACTOME_REGULATION_OF_LIPID_METABOLISM_BY_PEROXISOME_PROLIFERATOR_ACTIVATED_RECEPTOR_ALPHA_PPARALP |
| 15:61065568  | VPS13C | EACTOME_REGULATION_OF_LIPID_METABOLISM_BY_PEROXISOME_PROLIFERATOR_ACTIVATED_RECEPTOR_ALPHA_PPARALP |
| 15:61094298  | VPS13C | EACTOME_REGULATION_OF_LIPID_METABOLISM_BY_PEROXISOME_PROLIFERATOR_ACTIVATED_RECEPTOR_ALPHA_PPARALP |
| 15:61140736  | VPS13C | EACTOME_REGULATION_OF_LIPID_METABOLISM_BY_PEROXISOME_PROLIFERATOR_ACTIVATED_RECEPTOR_ALPHA_PPARALP |
| 15:61142062  | VPS13C | EACTOME_REGULATION_OF_LIPID_METABOLISM_BY_PEROXISOME_PROLIFERATOR_ACTIVATED_RECEPTOR_ALPHA_PPARALP |
| 15:61162571  | VPS13C | EACTOME_REGULATION_OF_LIPID_METABOLISM_BY_PEROXISOME_PROLIFERATOR_ACTIVATED_RECEPTOR_ALPHA_PPARALP |
| 15:61191617  | VPS13C | EACTOME_REGULATION_OF_LIPID_METABOLISM_BY_PEROXISOME_PROLIFERATOR_ACTIVATED_RECEPTOR_ALPHA_PPARALP |
| 15:61195427  | VPS13C | EACTOME_REGULATION_OF_LIPID_METABOLISM_BY_PEROXISOME_PROLIFERATOR_ACTIVATED_RECEPTOR_ALPHA_PPARALP |
| 15:61221682  | VPS13C | EACTOME_REGULATION_OF_LIPID_METABOLISM_BY_PEROXISOME_PROLIFERATOR_ACTIVATED_RECEPTOR_ALPHA_PPARALP |
| 15:61298486  | VPS13C | EACTOME_REGULATION_OF_LIPID_METABOLISM_BY_PEROXISOME_PROLIFERATOR_ACTIVATED_RECEPTOR_ALPHA_PPARALP |
| 15:61375480  | VPS13C | EACTOME_REGULATION_OF_LIPID_METABOLISM_BY_PEROXISOME_PROLIFERATOR_ACTIVATED_RECEPTOR_ALPHA_PPARALP |
| 15:61434581  | VPS13C | EACTOME_REGULATION_OF_LIPID_METABOLISM_BY_PEROXISOME_PROLIFERATOR_ACTIVATED_RECEPTOR_ALPHA_PPARALP |
| 15:61467078  | VPS13C | EACTOME_REGULATION_OF_LIPID_METABOLISM_BY_PEROXISOME_PROLIFERATOR_ACTIVATED_RECEPTOR_ALPHA_PPARALP |
| 15:61470808  | VPS13C | EACTOME_REGULATION_OF_LIPID_METABOLISM_BY_PEROXISOME_PROLIFERATOR_ACTIVATED_RECEPTOR_ALPHA_PPARALP |
| 15:61500263  | VPS13C | EACTOME_REGULATION_OF_LIPID_METABOLISM_BY_PEROXISOME_PROLIFERATOR_ACTIVATED_RECEPTOR_ALPHA_PPARALP |
| 17:60124582  | BRIP1  | EACTOME_REGULATION_OF_LIPID_METABOLISM_BY_PEROXISOME_PROLIFERATOR_ACTIVATED_RECEPTOR_ALPHA_PPARALP |
| 4:114424939  | CAMK2D | REACTOME_REGULATION_OF_MECP2_EXPRESSION_AND_ACTIVITY                                               |
| 4:114494052  | CAMK2D | REACTOME_REGULATION_OF_MECP2_EXPRESSION_AND_ACTIVITY                                               |
| 4:114529492  | CAMK2D | REACTOME_REGULATION_OF_MECP2_EXPRESSION_AND_ACTIVITY                                               |
| 4:114539964  | CAMK2D | REACTOME_REGULATION_OF_MECP2_EXPRESSION_AND_ACTIVITY                                               |
| 4:114597918  | CAMK2D | REACTOME_REGULATION_OF_MECP2_EXPRESSION_AND_ACTIVITY                                               |
| 10:103185542 | GBF1   | REACTOME_REGULATION_OF_MITOTIC_CELL_CYCLE                                                          |
| 10:103305087 | GBF1   | REACTOME_REGULATION_OF_MITOTIC_CELL_CYCLE                                                          |
| 10:103308244 | GBF1   | REACTOME_REGULATION_OF_MITOTIC_CELL_CYCLE                                                          |
| 17:45215865  | WNT3   | REACTOME_REGULATION_OF_MITOTIC_CELL_CYCLE                                                          |
| 17:45244822  | WNT3   | REACTOME_REGULATION_OF_MITOTIC_CELL_CYCLE                                                          |

|              |                 |                                                                                            |
|--------------|-----------------|--------------------------------------------------------------------------------------------|
| 10:103185542 | <i>GBF1</i>     | REACTOME_REGULATION_OF_PLK1_ACTIVITY_AT_G2_M_TRANSITION                                    |
| 10:103305087 | <i>GBF1</i>     | REACTOME_REGULATION_OF_PLK1_ACTIVITY_AT_G2_M_TRANSITION                                    |
| 10:103308244 | <i>GBF1</i>     | REACTOME_REGULATION_OF_PLK1_ACTIVITY_AT_G2_M_TRANSITION                                    |
| 10:104258303 | <i>GBF1</i>     | REACTOME_REGULATION_OF_PLK1_ACTIVITY_AT_G2_M_TRANSITION                                    |
| 16:19562008  | <i>SYT17</i>    | REACTOME_REGULATION_OF_PLK1_ACTIVITY_AT_G2_M_TRANSITION                                    |
| 17:7578671   | <i>V1NB1</i>    | REACTOME_REGULATION_OF_PTEN_GENE_TRANSCRIPTION                                             |
| 6:112137847  | <i>FYN</i>      | REACTOME_REGULATION_OF_SIGNALING_BY_CBL                                                    |
| 6:112151452  | <i>FYN</i>      | REACTOME_REGULATION_OF_SIGNALING_BY_CBL                                                    |
| 6:112175069  | <i>FYN</i>      | REACTOME_REGULATION_OF_SIGNALING_BY_CBL                                                    |
| 1:226074321  | <i>ITPKB</i>    | REACTOME_REGULATION_OF_SIGNALING_BY_NODAL                                                  |
| 16:50790891  | <i>CASC16</i>   | REACTOME_REGULATION_OF_TNFR1_SIGNALING                                                     |
| 19:2335872   | <i>SPPL2B</i>   | REACTOME_REGULATION_OF_TNFR1_SIGNALING                                                     |
| 19:2346990   | <i>SPPL2B</i>   | REACTOME_REGULATION_OF_TNFR1_SIGNALING                                                     |
| 19:2352757   | <i>SPPL2B</i>   | REACTOME_REGULATION_OF_TNFR1_SIGNALING                                                     |
| 5:133558885  | <i>C5orf24</i>  | REACTOME_REGULATION_OF_TP53_ACTIVITY                                                       |
| 6:31862876   | <i>HLA-DRB5</i> | REACTOME_REGULATION_OF_TP53_ACTIVITY                                                       |
| 6:33287183   | <i>HLA-DRB5</i> | REACTOME_REGULATION_OF_TP53_ACTIVITY                                                       |
| 17:7578671   | <i>V1NB1</i>    | REACTOME_REGULATION_OF_TP53_ACTIVITY                                                       |
| 17:59791813  | <i>BRIP1</i>    | REACTOME_REGULATION_OF_TP53_ACTIVITY                                                       |
| 17:59922925  | <i>BRIP1</i>    | REACTOME_REGULATION_OF_TP53_ACTIVITY                                                       |
| 17:7578671   | <i>V1NB1</i>    | REACTOME_REGULATION_OF_TP53_ACTIVITY_THROUGH_ACETYLATION                                   |
| 17:7578671   | <i>V1NB1</i>    | REACTOME_REGULATION_OF_TP53_ACTIVITY_THROUGH_ASSOCIATION_WITH_CO_FACTORS                   |
| 6:31862876   | <i>HLA-DRB5</i> | REACTOME_REGULATION_OF_TP53_ACTIVITY_THROUGH_METHYLATION                                   |
| 17:7578671   | <i>V1NB1</i>    | REACTOME_REGULATION_OF_TP53_ACTIVITY_THROUGH_METHYLATION                                   |
| 17:7578671   | <i>V1NB1</i>    | REACTOME_REGULATION_OF_TP53_ACTIVITY_THROUGH_PHOSPHORYLATION                               |
| 17:59791813  | <i>BRIP1</i>    | REACTOME_REGULATION_OF_TP53_ACTIVITY_THROUGH_PHOSPHORYLATION                               |
| 17:59922925  | <i>BRIP1</i>    | REACTOME_REGULATION_OF_TP53_ACTIVITY_THROUGH_PHOSPHORYLATION                               |
| 5:133558885  | <i>C5orf24</i>  | REACTOME_REGULATION_OF_TP53_EXPRESSION_AND_DEGRADATION                                     |
| 6:33287183   | <i>HLA-DRB5</i> | REACTOME_REGULATION_OF_TP53_EXPRESSION_AND_DEGRADATION                                     |
| 17:7578671   | <i>V1NB1</i>    | REACTOME_REGULATION_OF_TP53_EXPRESSION_AND_DEGRADATION                                     |
| 19:3008151   | <i>SPPL2B</i>   | REACTOME_REPRESSION_OF_WNT_TARGET_GENES                                                    |
| 19:3024077   | <i>SPPL2B</i>   | REACTOME_REPRESSION_OF_WNT_TARGET_GENES                                                    |
| 1:156059276  | <i>GBAP1</i>    | REACTOME_REPRODUCTION                                                                      |
| 5:134307319  | <i>C5orf24</i>  | REACTOME_REPRODUCTION                                                                      |
| 5:134315853  | <i>C5orf24</i>  | REACTOME_REPRODUCTION                                                                      |
| 6:31716436   | <i>HLA-DRB5</i> | REACTOME_REPRODUCTION                                                                      |
| 14:75495059  | <i>RPS6KL1</i>  | REACTOME_REPRODUCTION                                                                      |
| 1:226568665  | <i>ITPKB</i>    | REACTOME_RESOLUTION_OF_ABASIC_SITES_AP_SITES                                               |
| 12:133206648 | <i>FBRSL1</i>   | REACTOME_RESOLUTION_OF_ABASIC_SITES_AP_SITES                                               |
| 12:133223685 | <i>FBRSL1</i>   | REACTOME_RESOLUTION_OF_ABASIC_SITES_AP_SITES                                               |
| 1:226568665  | <i>ITPKB</i>    | REACTOME_RESOLUTION_OF_AP_SITES_VIA_THE_MULTIPLE_NUCLEOTIDE_PATCH_REPLACEMENT_PATHWAY      |
| 12:133206648 | <i>FBRSL1</i>   | REACTOME_RESOLUTION_OF_AP_SITES_VIA_THE_MULTIPLE_NUCLEOTIDE_PATCH_REPLACEMENT_PATHWAY      |
| 12:133223685 | <i>FBRSL1</i>   | REACTOME_RESOLUTION_OF_AP_SITES_VIA_THE_MULTIPLE_NUCLEOTIDE_PATCH_REPLACEMENT_PATHWAY      |
| 2:17941653   | <i>KCNS3</i>    | REACTOME_RESOLUTION_OF_D_LOOP_STRUCTURES                                                   |
| 2:17963171   | <i>KCNS3</i>    | REACTOME_RESOLUTION_OF_D_LOOP_STRUCTURES                                                   |
| 17:59791813  | <i>BRIP1</i>    | REACTOME_RESOLUTION_OF_D_LOOP_STRUCTURES                                                   |
| 17:59922925  | <i>BRIP1</i>    | REACTOME_RESOLUTION_OF_D_LOOP_STRUCTURES                                                   |
| 17:59791813  | <i>BRIP1</i>    | REACTOME_RESOLUTION_OF_D_LOOP_STRUCTURES_THROUGH_SYNTHESIS_DEPENDENT_STRAND_ANNEALING_SDSA |
| 17:59922925  | <i>BRIP1</i>    | REACTOME_RESOLUTION_OF_D_LOOP_STRUCTURES_THROUGH_SYNTHESIS_DEPENDENT_STRAND_ANNEALING_SDSA |
| 2:169747216  | <i>STK39</i>    | REACTOME_RESOLUTION_OF_SISTER_CHROMATID_COHESION                                           |
| 5:133558885  | <i>C5orf24</i>  | REACTOME_RESOLUTION_OF_SISTER_CHROMATID_COHESION                                           |
| 12:122816734 | <i>HIP1R</i>    | REACTOME_RESOLUTION_OF_SISTER_CHROMATID_COHESION                                           |
| 12:122817580 | <i>HIP1R</i>    | REACTOME_RESOLUTION_OF_SISTER_CHROMATID_COHESION                                           |

|              |                 |                                                                                                         |
|--------------|-----------------|---------------------------------------------------------------------------------------------------------|
| 12:122853197 | <i>HIP1R</i>    | REACTOME_RESOLUTION_OF_SISTER_CHROMATID_COHESION                                                        |
| 12:123057792 | <i>HIP1R</i>    | REACTOME_RESOLUTION_OF_SISTER_CHROMATID_COHESION                                                        |
| 12:123110365 | <i>HIP1R</i>    | REACTOME_RESOLUTION_OF_SISTER_CHROMATID_COHESION                                                        |
| 12:123110785 | <i>HIP1R</i>    | REACTOME_RESOLUTION_OF_SISTER_CHROMATID_COHESION                                                        |
| 1:161171736  | <i>FCGR2A</i>   | RESPIRATORY_ELECTRON_TRANSPORT_ATP_SYNTHESIS_BY_CHEMIOSMOTIC_COUPLING_AND_HEAT_PRODUCTION_BY_UNCOUPLING |
| 5:60273923   | <i>ELOVL7</i>   | RESPIRATORY_ELECTRON_TRANSPORT_ATP_SYNTHESIS_BY_CHEMIOSMOTIC_COUPLING_AND_HEAT_PRODUCTION_BY_UNCOUPLING |
| 5:60288288   | <i>ELOVL7</i>   | RESPIRATORY_ELECTRON_TRANSPORT_ATP_SYNTHESIS_BY_CHEMIOSMOTIC_COUPLING_AND_HEAT_PRODUCTION_BY_UNCOUPLING |
| 1:161171736  | <i>FCGR2A</i>   | REACTOME_RESPIRATORY_ELECTRON_TRANSPORT                                                                 |
| 5:60273923   | <i>ELOVL7</i>   | REACTOME_RESPIRATORY_ELECTRON_TRANSPORT                                                                 |
| 5:60288288   | <i>ELOVL7</i>   | REACTOME_RESPIRATORY_ELECTRON_TRANSPORT                                                                 |
| 4:90804532   | <i>SNCA_2</i>   | REACTOME_RESPONSE_TO_ELEVATED_PLATELET_CYTOSOLIC_CA2PLUS                                                |
| 4:90868355   | <i>SNCA_2</i>   | REACTOME_RESPONSE_TO_ELEVATED_PLATELET_CYTOSOLIC_CA2PLUS                                                |
| 6:31682029   | <i>HLA-DRB5</i> | REACTOME_RESPONSE_TO_ELEVATED_PLATELET_CYTOSOLIC_CA2PLUS                                                |
| 8:130914130  | <i>FAM49B</i>   | REACTOME_RESPONSE_TO_ELEVATED_PLATELET_CYTOSOLIC_CA2PLUS                                                |
| 8:131002284  | <i>FAM49B</i>   | REACTOME_RESPONSE_TO_ELEVATED_PLATELET_CYTOSOLIC_CA2PLUS                                                |
| 17:42454243  | <i>FAM171A2</i> | REACTOME_RESPONSE_TO_ELEVATED_PLATELET_CYTOSOLIC_CA2PLUS                                                |
| 17:76969183  | <i>DNAH17</i>   | REACTOME_RESPONSE_TO_ELEVATED_PLATELET_CYTOSOLIC_CA2PLUS                                                |
| 1:171837985  | <i>VAMP4</i>    | REACTOME_RETROGRADE_NEUROTROPHIN_SIGNALLING                                                             |
| 1:171945488  | <i>VAMP4</i>    | REACTOME_RETROGRADE_NEUROTROPHIN_SIGNALLING                                                             |
| 1:172137119  | <i>VAMP4</i>    | REACTOME_RETROGRADE_NEUROTROPHIN_SIGNALLING                                                             |
| 1:172386261  | <i>VAMP4</i>    | REACTOME_RETROGRADE_NEUROTROPHIN_SIGNALLING                                                             |
| 9:17579690   | <i>SH3GL2_2</i> | REACTOME_RETROGRADE_NEUROTROPHIN_SIGNALLING                                                             |
| 9:17587160   | <i>SH3GL2_2</i> | REACTOME_RETROGRADE_NEUROTROPHIN_SIGNALLING                                                             |
| 9:17609302   | <i>SH3GL2_2</i> | REACTOME_RETROGRADE_NEUROTROPHIN_SIGNALLING                                                             |
| 9:17626762   | <i>SH3GL2_2</i> | REACTOME_RETROGRADE_NEUROTROPHIN_SIGNALLING                                                             |
| 9:17627444   | <i>SH3GL2_2</i> | REACTOME_RETROGRADE_NEUROTROPHIN_SIGNALLING                                                             |
| 9:17642664   | <i>SH3GL2_2</i> | REACTOME_RETROGRADE_NEUROTROPHIN_SIGNALLING                                                             |
| 9:17710876   | <i>SH3GL2_2</i> | REACTOME_RETROGRADE_NEUROTROPHIN_SIGNALLING                                                             |
| 9:17732590   | <i>SH3GL2_2</i> | REACTOME_RETROGRADE_NEUROTROPHIN_SIGNALLING                                                             |
| 9:17737514   | <i>SH3GL2_2</i> | REACTOME_RETROGRADE_NEUROTROPHIN_SIGNALLING                                                             |
| 9:17758945   | <i>SH3GL2_2</i> | REACTOME_RETROGRADE_NEUROTROPHIN_SIGNALLING                                                             |
| 1:171689486  | <i>VAMP4</i>    | REACTOME_RETROGRADE_TRANSPORT_AT_THE_TRANS_GOLGI_NETWORK                                                |
| 17:44800946  | <i>WNT3</i>     | REACTOME_RETROGRADE_TRANSPORT_AT_THE_TRANS_GOLGI_NETWORK                                                |
| 17:44833217  | <i>WNT3</i>     | REACTOME_RETROGRADE_TRANSPORT_AT_THE_TRANS_GOLGI_NETWORK                                                |
| 8:21565088   | <i>BIN3</i>     | REACTOME_RET_SIGNALING                                                                                  |
| 8:21582921   | <i>BIN3</i>     | REACTOME_RET_SIGNALING                                                                                  |
| 8:21665306   | <i>BIN3</i>     | REACTOME_RET_SIGNALING                                                                                  |
| 8:21668901   | <i>BIN3</i>     | REACTOME_RET_SIGNALING                                                                                  |
| 1:155975202  | <i>GBAP1</i>    | REACTOME_RHO_GTPASE_CYCLE                                                                               |
| 1:161035780  | <i>FCGR2A</i>   | REACTOME_RHO_GTPASE_CYCLE                                                                               |
| 3:49406095   | <i>IP6K2</i>    | REACTOME_RHO_GTPASE_CYCLE                                                                               |
| 3:49424231   | <i>IP6K2</i>    | REACTOME_RHO_GTPASE_CYCLE                                                                               |
| 3:49450137   | <i>IP6K2</i>    | REACTOME_RHO_GTPASE_CYCLE                                                                               |
| 4:89711319   | <i>SNCA_2</i>   | REACTOME_RHO_GTPASE_CYCLE                                                                               |
| 4:89740128   | <i>SNCA_2</i>   | REACTOME_RHO_GTPASE_CYCLE                                                                               |
| 4:90002389   | <i>SNCA_2</i>   | REACTOME_RHO_GTPASE_CYCLE                                                                               |
| 5:59958372   | <i>ELOVL7</i>   | REACTOME_RHO_GTPASE_CYCLE                                                                               |
| 17:43472507  | <i>CRHR1_2</i>  | REACTOME_RHO_GTPASE_CYCLE                                                                               |
| 2:169747216  | <i>STK39</i>    | REACTOME_RHO_GTPASE_EFFECTORS                                                                           |
| 3:49406095   | <i>IP6K2</i>    | REACTOME_RHO_GTPASE_EFFECTORS                                                                           |
| 3:49424231   | <i>IP6K2</i>    | REACTOME_RHO_GTPASE_EFFECTORS                                                                           |
| 3:49450137   | <i>IP6K2</i>    | REACTOME_RHO_GTPASE_EFFECTORS                                                                           |
| 5:133558885  | <i>C5orf24</i>  | REACTOME_RHO_GTPASE_EFFECTORS                                                                           |

|              |                 |                                                                           |
|--------------|-----------------|---------------------------------------------------------------------------|
| 12:122816734 | <i>HIP1R</i>    | REACTOME_RHO_GTPASE_EFFECTORS                                             |
| 12:122817580 | <i>HIP1R</i>    | REACTOME_RHO_GTPASE_EFFECTORS                                             |
| 12:122853197 | <i>HIP1R</i>    | REACTOME_RHO_GTPASE_EFFECTORS                                             |
| 12:123057792 | <i>HIP1R</i>    | REACTOME_RHO_GTPASE_EFFECTORS                                             |
| 12:123110365 | <i>HIP1R</i>    | REACTOME_RHO_GTPASE_EFFECTORS                                             |
| 12:123110785 | <i>HIP1R</i>    | REACTOME_RHO_GTPASE_EFFECTORS                                             |
| 14:56110265  | <i>GCH1</i>     | REACTOME_RHO_GTPASE_EFFECTORS                                             |
| 17:7101771   | <i>V1NB1</i>    | REACTOME_RHO_GTPASE_EFFECTORS                                             |
| 17:7129974   | <i>V1NB1</i>    | REACTOME_RHO_GTPASE_EFFECTORS                                             |
| 17:43302259  | <i>CRHR1_2</i>  | REACTOME_RHO_GTPASE_EFFECTORS                                             |
| 3:49406095   | <i>IP6K2</i>    | REACTOME_RHO_GTPASES_ACTIVATE_CIT                                         |
| 3:49424231   | <i>IP6K2</i>    | REACTOME_RHO_GTPASES_ACTIVATE_CIT                                         |
| 3:49450137   | <i>IP6K2</i>    | REACTOME_RHO_GTPASES_ACTIVATE_CIT                                         |
| 17:7101771   | <i>V1NB1</i>    | REACTOME_RHO_GTPASES_ACTIVATE_CIT                                         |
| 2:169747216  | <i>STK39</i>    | REACTOME_RHO_GTPASES_ACTIVATE_FORMINS                                     |
| 3:49406095   | <i>IP6K2</i>    | REACTOME_RHO_GTPASES_ACTIVATE_FORMINS                                     |
| 3:49424231   | <i>IP6K2</i>    | REACTOME_RHO_GTPASES_ACTIVATE_FORMINS                                     |
| 3:49450137   | <i>IP6K2</i>    | REACTOME_RHO_GTPASES_ACTIVATE_FORMINS                                     |
| 5:133558885  | <i>C5orf24</i>  | REACTOME_RHO_GTPASES_ACTIVATE_FORMINS                                     |
| 12:122816734 | <i>HIP1R</i>    | REACTOME_RHO_GTPASES_ACTIVATE_FORMINS                                     |
| 12:122817580 | <i>HIP1R</i>    | REACTOME_RHO_GTPASES_ACTIVATE_FORMINS                                     |
| 12:122853197 | <i>HIP1R</i>    | REACTOME_RHO_GTPASES_ACTIVATE_FORMINS                                     |
| 12:123057792 | <i>HIP1R</i>    | REACTOME_RHO_GTPASES_ACTIVATE_FORMINS                                     |
| 12:123110365 | <i>HIP1R</i>    | REACTOME_RHO_GTPASES_ACTIVATE_FORMINS                                     |
| 12:123110785 | <i>HIP1R</i>    | REACTOME_RHO_GTPASES_ACTIVATE_FORMINS                                     |
| 17:7129974   | <i>V1NB1</i>    | REACTOME_RHO_GTPASES_ACTIVATE_FORMINS                                     |
| 17:43302259  | <i>CRHR1_2</i>  | REACTOME_RHO_GTPASES_ACTIVATE_FORMINS                                     |
| 12:122816734 | <i>HIP1R</i>    | REACTOME_RHO_GTPASES_ACTIVATE_IQGAPS                                      |
| 12:122817580 | <i>HIP1R</i>    | REACTOME_RHO_GTPASES_ACTIVATE_IQGAPS                                      |
| 12:122853197 | <i>HIP1R</i>    | REACTOME_RHO_GTPASES_ACTIVATE_IQGAPS                                      |
| 3:49406095   | <i>IP6K2</i>    | REACTOME_RHO_GTPASES_ACTIVATE_KTN1                                        |
| 3:49424231   | <i>IP6K2</i>    | REACTOME_RHO_GTPASES_ACTIVATE_KTN1                                        |
| 3:49450137   | <i>IP6K2</i>    | REACTOME_RHO_GTPASES_ACTIVATE_KTN1                                        |
| 14:56110265  | <i>GCH1</i>     | REACTOME_RHO_GTPASES_ACTIVATE_KTN1                                        |
| 3:49406095   | <i>IP6K2</i>    | REACTOME_RHO_GTPASES_ACTIVATE_PKNS                                        |
| 3:49424231   | <i>IP6K2</i>    | REACTOME_RHO_GTPASES_ACTIVATE_PKNS                                        |
| 3:49450137   | <i>IP6K2</i>    | REACTOME_RHO_GTPASES_ACTIVATE_PKNS                                        |
| 3:49406095   | <i>IP6K2</i>    | REACTOME_RHO_GTPASES_ACTIVATE_RHOTEKIN_AND_RHOPHILINS                     |
| 3:49424231   | <i>IP6K2</i>    | REACTOME_RHO_GTPASES_ACTIVATE_RHOTEKIN_AND_RHOPHILINS                     |
| 3:49450137   | <i>IP6K2</i>    | REACTOME_RHO_GTPASES_ACTIVATE_RHOTEKIN_AND_RHOPHILINS                     |
| 3:49406095   | <i>IP6K2</i>    | REACTOME_RHO_GTPASES_ACTIVATE_ROCKS                                       |
| 3:49424231   | <i>IP6K2</i>    | REACTOME_RHO_GTPASES_ACTIVATE_ROCKS                                       |
| 3:49450137   | <i>IP6K2</i>    | REACTOME_RHO_GTPASES_ACTIVATE_ROCKS                                       |
| 12:46134812  | <i>SCAF11</i>   | REACTOME_RMTS_METHYLATE_HISTONE_ARGININES                                 |
| 12:46206268  | <i>SCAF11</i>   | REACTOME_RMTS_METHYLATE_HISTONE_ARGININES                                 |
| 8:22108784   | <i>BIN3</i>     | REACTOME_RNA_POLYMERASE_III_CHAIN_ELONGATION                              |
| 8:22108784   | <i>BIN3</i>     | REACTOME_RNA_POLYMERASE_III_TRANSCRIPTION_INITIATION_FROM_TYPE_1_PROMOTER |
| 8:22108784   | <i>BIN3</i>     | REACTOME_RNA_POLYMERASE_III_TRANSCRIPTION_INITIATION_FROM_TYPE_3_PROMOTER |
| 8:22108784   | <i>BIN3</i>     | REACTOME_RNA_POLYMERASE_III_TRANSCRIPTION                                 |
| 8:22108784   | <i>BIN3</i>     | REACTOME_RNA_POLYMERASE_III_TRANSCRIPTION_TERMINATION                     |
| 2:135708115  | <i>TMEM163</i>  | REACTOME_RNA_POLYMERASE_II_PRE_TRANSCRIPTION_EVENTS                       |
| 6:31925679   | <i>HLA-DRB5</i> | REACTOME_RNA_POLYMERASE_II_PRE_TRANSCRIPTION_EVENTS                       |
| 2:135708115  | <i>TMEM163</i>  | REACTOME_RNA_POLYMERASE_II_TRANSCRIBES_SNRNA_GENES                        |

|              |                 |                                                                                                |
|--------------|-----------------|------------------------------------------------------------------------------------------------|
| 17:59967940  | <i>BRIP1</i>    | REACTOME_RNA_POLYMERASE_II_TRANSCRIBES_SNRNA_GENES                                             |
| 2:135708115  | <i>TMEM163</i>  | REACTOME_RNA_POLYMERASE_II_TRANSCRIPTION_ELONGATION                                            |
| 6:31925679   | <i>HLA-DRB5</i> | REACTOME_RNA_POLYMERASE_II_TRANSCRIPTION_ELONGATION                                            |
| 6:31862876   | <i>HLA-DRB5</i> | REACTOME_RNA_POLYMERASE_I_TRANSCRIPTION_INITIATION                                             |
| 6:31862876   | <i>HLA-DRB5</i> | REACTOME_RNA_POLYMERASE_I_TRANSCRIPTION                                                        |
| 3:48835245   | <i>IP6K2</i>    | REACTOME_ROBO_RECEPTORS_BIND_AKAP5                                                             |
| 6:112137847  | <i>FYN</i>      | REACTOME_ROLE_OF_LAT2_NTAL_LAB_ON_CALCIUM_MOBILIZATION                                         |
| 6:112151452  | <i>FYN</i>      | REACTOME_ROLE_OF_LAT2_NTAL_LAB_ON_CALCIUM_MOBILIZATION                                         |
| 6:112175069  | <i>FYN</i>      | REACTOME_ROLE_OF_LAT2_NTAL_LAB_ON_CALCIUM_MOBILIZATION                                         |
| 15:61016235  | <i>VPS13C</i>   | REACTOME_RORA_ACTIVATES_GENE_EXPRESSION                                                        |
| 15:61065568  | <i>VPS13C</i>   | REACTOME_RORA_ACTIVATES_GENE_EXPRESSION                                                        |
| 15:61094298  | <i>VPS13C</i>   | REACTOME_RORA_ACTIVATES_GENE_EXPRESSION                                                        |
| 15:61140736  | <i>VPS13C</i>   | REACTOME_RORA_ACTIVATES_GENE_EXPRESSION                                                        |
| 15:61142062  | <i>VPS13C</i>   | REACTOME_RORA_ACTIVATES_GENE_EXPRESSION                                                        |
| 15:61162571  | <i>VPS13C</i>   | REACTOME_RORA_ACTIVATES_GENE_EXPRESSION                                                        |
| 15:61191617  | <i>VPS13C</i>   | REACTOME_RORA_ACTIVATES_GENE_EXPRESSION                                                        |
| 15:61195427  | <i>VPS13C</i>   | REACTOME_RORA_ACTIVATES_GENE_EXPRESSION                                                        |
| 15:61221682  | <i>VPS13C</i>   | REACTOME_RORA_ACTIVATES_GENE_EXPRESSION                                                        |
| 15:61298486  | <i>VPS13C</i>   | REACTOME_RORA_ACTIVATES_GENE_EXPRESSION                                                        |
| 15:61375480  | <i>VPS13C</i>   | REACTOME_RORA_ACTIVATES_GENE_EXPRESSION                                                        |
| 15:61434581  | <i>VPS13C</i>   | REACTOME_RORA_ACTIVATES_GENE_EXPRESSION                                                        |
| 15:61467078  | <i>VPS13C</i>   | REACTOME_RORA_ACTIVATES_GENE_EXPRESSION                                                        |
| 15:61470808  | <i>VPS13C</i>   | REACTOME_RORA_ACTIVATES_GENE_EXPRESSION                                                        |
| 15:61500263  | <i>VPS13C</i>   | REACTOME_RORA_ACTIVATES_GENE_EXPRESSION                                                        |
| 12:124219791 | <i>HIP1R</i>    | REACTOME_ROS_AND_RNS_PRODUCTION_IN_PHAGOCYTES                                                  |
| 9:33467577   | <i>UBAP2</i>    | REACTOME_RRNA_MODIFICATION_IN_THE_NUCLEUS_AND_CYTOSOL                                          |
| 9:33467577   | <i>UBAP2</i>    | REACTOME_RRNA_PROCESSING_IN_THE_NUCLEUS_AND_CYTOSOL                                            |
| 9:33467577   | <i>UBAP2</i>    | REACTOME_RRNA_PROCESSING                                                                       |
| 12:46134812  | <i>SCAF11</i>   | REACTOME_RUNX1_INTERACTS_WITH_CO_FACTORS_WHOSE_PRECISE_EFFECT_ON_RUNX1_TARGETS_IS_NOT_KNOWN    |
| 12:46206268  | <i>SCAF11</i>   | REACTOME_RUNX1_INTERACTS_WITH_CO_FACTORS_WHOSE_PRECISE_EFFECT_ON_RUNX1_TARGETS_IS_NOT_KNOWN    |
| 17:42454243  | <i>FAM171A2</i> | REACTOME_RUNX1_REGULATES_GENES_INVOLVED_IN_MEGAKARYOCYTE_DIFFERENTIATION_AND_PLATELET_FUNCTION |
| 8:11353586   | <i>CTSB</i>     | REACTOME_RUNX1_REGULATES_TRANSCRIPTION_OF_GENES_INVOLVED_IN_BCR_SIGNALING                      |
| 8:11363667   | <i>CTSB</i>     | REACTOME_RUNX1_REGULATES_TRANSCRIPTION_OF_GENES_INVOLVED_IN_BCR_SIGNALING                      |
| 8:11381148   | <i>CTSB</i>     | REACTOME_RUNX1_REGULATES_TRANSCRIPTION_OF_GENES_INVOLVED_IN_BCR_SIGNALING                      |
| 19:1611856   | <i>SPPL2B</i>   | REACTOME_RUNX1_REGULATES_TRANSCRIPTION_OF_GENES_INVOLVED_IN_DIFFERENTIATION_OF_HSCS            |
| 14:55515304  | <i>GCH1</i>     | REACTOME_RUNX1_REGULATES_TRANSCRIPTION_OF_GENES_INVOLVED_IN_DIFFERENTIATION_OF_KERATINOCYTES   |
| 17:7578671   | <i>V1NB1</i>    | REACTOME_RUNX3_REGULATES_CDKN1A_TRANSCRIPTION                                                  |
| 16:30510571  | <i>SETD1A</i>   | REACTOME_RUNX3_REGULATES_IMMUNE_RESPONSE_AND_CELL_MIGRATION                                    |
| 16:30516492  | <i>SETD1A</i>   | REACTOME_RUNX3_REGULATES_IMMUNE_RESPONSE_AND_CELL_MIGRATION                                    |
| 16:30520856  | <i>SETD1A</i>   | REACTOME_RUNX3_REGULATES_IMMUNE_RESPONSE_AND_CELL_MIGRATION                                    |
| 6:32941506   | <i>HLA-DRB5</i> | REACTOME_RUNX3_REGULATES_P14_ARF                                                               |
| 8:16086683   | <i>FGF20</i>    | REACTOME_SCAVENGING_BY_CLASS_A_RECEPTORS                                                       |
| 8:16135246   | <i>FGF20</i>    | REACTOME_SCAVENGING_BY_CLASS_A_RECEPTORS                                                       |
| 6:112137847  | <i>FYN</i>      | REACTOME_SEMA3A_PAK_DEPENDENT_AXON_REPULSION                                                   |
| 6:112151452  | <i>FYN</i>      | REACTOME_SEMA3A_PAK_DEPENDENT_AXON_REPULSION                                                   |
| 6:112175069  | <i>FYN</i>      | REACTOME_SEMA3A_PAK_DEPENDENT_AXON_REPULSION                                                   |
| 6:112137847  | <i>FYN</i>      | REACTOME_SEMA3A_PLEXIN_REPULSION_SIGNALING_BY_INHIBITING_INTEGRIN_ADHESION                     |
| 6:112151452  | <i>FYN</i>      | REACTOME_SEMA3A_PLEXIN_REPULSION_SIGNALING_BY_INHIBITING_INTEGRIN_ADHESION                     |
| 6:112175069  | <i>FYN</i>      | REACTOME_SEMA3A_PLEXIN_REPULSION_SIGNALING_BY_INHIBITING_INTEGRIN_ADHESION                     |
| 3:49406095   | <i>IP6K2</i>    | REACTOME_SEMA4D_INDUCED_CELL_MIGRATION_AND_GROWTH_CONE_COLLAPSE                                |
| 3:49424231   | <i>IP6K2</i>    | REACTOME_SEMA4D_INDUCED_CELL_MIGRATION_AND_GROWTH_CONE_COLLAPSE                                |
| 3:49450137   | <i>IP6K2</i>    | REACTOME_SEMA4D_INDUCED_CELL_MIGRATION_AND_GROWTH_CONE_COLLAPSE                                |
| 3:49406095   | <i>IP6K2</i>    | REACTOME_SEMA4D_IN_SEMAPHORIN_SIGNALING                                                        |

|             |                 |                                                                      |
|-------------|-----------------|----------------------------------------------------------------------|
| 3:49424231  | <i>IP6K2</i>    | REACTOME_SEMA4D_IN_SEMAPHORIN_SIGNALING                              |
| 3:49450137  | <i>IP6K2</i>    | REACTOME_SEMA4D_IN_SEMAPHORIN_SIGNALING                              |
| 3:49406095  | <i>IP6K2</i>    | REACTOME_SEMA4D_MEDIATED_INHIBITION_OF_CELL_ATTACHMENT_AND_MIGRATION |
| 3:49424231  | <i>IP6K2</i>    | REACTOME_SEMA4D_MEDIATED_INHIBITION_OF_CELL_ATTACHMENT_AND_MIGRATION |
| 3:49450137  | <i>IP6K2</i>    | REACTOME_SEMA4D_MEDIATED_INHIBITION_OF_CELL_ATTACHMENT_AND_MIGRATION |
| 3:49406095  | <i>IP6K2</i>    | REACTOME_SEMAPHORIN_INTERACTIONS                                     |
| 3:49424231  | <i>IP6K2</i>    | REACTOME_SEMAPHORIN_INTERACTIONS                                     |
| 3:49450137  | <i>IP6K2</i>    | REACTOME_SEMAPHORIN_INTERACTIONS                                     |
| 6:112137847 | <i>FYN</i>      | REACTOME_SEMAPHORIN_INTERACTIONS                                     |
| 6:112151452 | <i>FYN</i>      | REACTOME_SEMAPHORIN_INTERACTIONS                                     |
| 6:112175069 | <i>FYN</i>      | REACTOME_SEMAPHORIN_INTERACTIONS                                     |
| 6:31862876  | <i>HLA-DRB5</i> | REACTOME_SENESCENCE_ASSOCIATED_SECRETORY_PHENOTYPE_SASP              |
| 17:45215865 | <i>WNT3</i>     | REACTOME_SENESCENCE_ASSOCIATED_SECRETORY_PHENOTYPE_SASP              |
| 17:45244822 | <i>WNT3</i>     | REACTOME_SENESCENCE_ASSOCIATED_SECRETORY_PHENOTYPE_SASP              |
| 6:72646790  | <i>RIMS1</i>    | REACTOME_SEROTONIN_NEUROTRANSMITTER_RELEASE_CYCLE                    |
| 6:72648340  | <i>RIMS1</i>    | REACTOME_SEROTONIN_NEUROTRANSMITTER_RELEASE_CYCLE                    |
| 6:72686444  | <i>RIMS1</i>    | REACTOME_SEROTONIN_NEUROTRANSMITTER_RELEASE_CYCLE                    |
| 6:72716358  | <i>RIMS1</i>    | REACTOME_SEROTONIN_NEUROTRANSMITTER_RELEASE_CYCLE                    |
| 6:72904599  | <i>RIMS1</i>    | REACTOME_SEROTONIN_NEUROTRANSMITTER_RELEASE_CYCLE                    |
| 6:72913435  | <i>RIMS1</i>    | REACTOME_SEROTONIN_NEUROTRANSMITTER_RELEASE_CYCLE                    |
| 6:72930929  | <i>RIMS1</i>    | REACTOME_SEROTONIN_NEUROTRANSMITTER_RELEASE_CYCLE                    |
| 6:72982289  | <i>RIMS1</i>    | REACTOME_SEROTONIN_NEUROTRANSMITTER_RELEASE_CYCLE                    |
| 6:72986711  | <i>RIMS1</i>    | REACTOME_SEROTONIN_NEUROTRANSMITTER_RELEASE_CYCLE                    |
| 6:73008061  | <i>RIMS1</i>    | REACTOME_SEROTONIN_NEUROTRANSMITTER_RELEASE_CYCLE                    |
| 6:73060492  | <i>RIMS1</i>    | REACTOME_SEROTONIN_NEUROTRANSMITTER_RELEASE_CYCLE                    |
| 3:151090424 | <i>MED12L</i>   | REACTOME_SIGNAL_AMPLIFICATION                                        |
| 3:151099733 | <i>MED12L</i>   | REACTOME_SIGNAL_AMPLIFICATION                                        |
| 19:2557113  | <i>SPPL2B</i>   | REACTOME_SIGNAL_AMPLIFICATION                                        |
| 19:2563327  | <i>SPPL2B</i>   | REACTOME_SIGNAL_AMPLIFICATION                                        |
| 19:2580057  | <i>SPPL2B</i>   | REACTOME_SIGNAL_AMPLIFICATION                                        |
| 19:2660983  | <i>SPPL2B</i>   | REACTOME_SIGNAL_AMPLIFICATION                                        |
| 19:3142784  | <i>SPPL2B</i>   | REACTOME_SIGNAL_AMPLIFICATION                                        |
| 19:3147326  | <i>SPPL2B</i>   | REACTOME_SIGNAL_AMPLIFICATION                                        |
| 19:2251817  | <i>SPPL2B</i>   | REACTOME_SIGNALING_BY_BMP                                            |
| 1:156059276 | <i>GBAP1</i>    | REACTOME_SIGNALING_BY_BRAF_AND_RAF_FUSIONS                           |
| 4:114424939 | <i>CAMK2D</i>   | REACTOME_SIGNALING_BY_BRAF_AND_RAF_FUSIONS                           |
| 4:114494052 | <i>CAMK2D</i>   | REACTOME_SIGNALING_BY_BRAF_AND_RAF_FUSIONS                           |
| 4:114529492 | <i>CAMK2D</i>   | REACTOME_SIGNALING_BY_BRAF_AND_RAF_FUSIONS                           |
| 4:114539964 | <i>CAMK2D</i>   | REACTOME_SIGNALING_BY_BRAF_AND_RAF_FUSIONS                           |
| 4:114597918 | <i>CAMK2D</i>   | REACTOME_SIGNALING_BY_BRAF_AND_RAF_FUSIONS                           |
| 17:42454243 | <i>FAM171A2</i> | REACTOME_SIGNALING_BY_BRAF_AND_RAF_FUSIONS                           |
| 17:40392358 | <i>RETREG3</i>  | REACTOME_SIGNALING_BY_CYTOSOLIC_FGFR1_FUSION_MUTANTS                 |
| 9:17579690  | <i>SH3GL2_2</i> | REACTOME_SIGNALING_BY_EGFR                                           |
| 9:17587160  | <i>SH3GL2_2</i> | REACTOME_SIGNALING_BY_EGFR                                           |
| 9:17609302  | <i>SH3GL2_2</i> | REACTOME_SIGNALING_BY_EGFR                                           |
| 9:17626762  | <i>SH3GL2_2</i> | REACTOME_SIGNALING_BY_EGFR                                           |
| 9:17627444  | <i>SH3GL2_2</i> | REACTOME_SIGNALING_BY_EGFR                                           |
| 9:17642664  | <i>SH3GL2_2</i> | REACTOME_SIGNALING_BY_EGFR                                           |
| 9:17710876  | <i>SH3GL2_2</i> | REACTOME_SIGNALING_BY_EGFR                                           |
| 9:17732590  | <i>SH3GL2_2</i> | REACTOME_SIGNALING_BY_EGFR                                           |
| 9:17737514  | <i>SH3GL2_2</i> | REACTOME_SIGNALING_BY_EGFR                                           |
| 9:17758945  | <i>SH3GL2_2</i> | REACTOME_SIGNALING_BY_EGFR                                           |
| 3:49406095  | <i>IP6K2</i>    | REACTOME_SIGNALING_BY_ERBB2                                          |

|              |                     |                                        |
|--------------|---------------------|----------------------------------------|
| 3:49424231   | <i>IP6K2</i>        | REACTOME_SIGNALING_BY_ERBB2            |
| 3:49450137   | <i>IP6K2</i>        | REACTOME_SIGNALING_BY_ERBB2            |
| 6:112137847  | <i>FYN</i>          | REACTOME_SIGNALING_BY_ERBB2            |
| 6:112151452  | <i>FYN</i>          | REACTOME_SIGNALING_BY_ERBB2            |
| 6:112175069  | <i>FYN</i>          | REACTOME_SIGNALING_BY_ERBB2            |
| 1:227067656  | <i>ITPKB</i>        | REACTOME_SIGNALING_BY_ERBB4            |
| 17:7101771   | <i>V1NB1</i>        | REACTOME_SIGNALING_BY_ERBB4            |
| 17:42990894  | <i>CRHR1_2</i>      | REACTOME_SIGNALING_BY_ERBB4            |
| 17:40392358  | <i>RETREG3</i>      | REACTOME_SIGNALING_BY_ERYTHROPOIETIN   |
| 17:40392358  | <i>RETREG3</i>      | REACTOME_SIGNALING_BY_FGFR1_IN_DISEASE |
| 5:133558885  | <i>C5orf24</i>      | REACTOME_SIGNALING_BY_FGFR1            |
| 5:133558885  | <i>C5orf24</i>      | REACTOME_SIGNALING_BY_FGFR2            |
| 5:133558885  | <i>C5orf24</i>      | REACTOME_SIGNALING_BY_FGFR3            |
| 5:133558885  | <i>C5orf24</i>      | REACTOME_SIGNALING_BY_FGFR4            |
| 17:40392358  | <i>RETREG3</i>      | REACTOME_SIGNALING_BY_FGFR_IN_DISEASE  |
| 5:133558885  | <i>C5orf24</i>      | REACTOME_SIGNALING_BY_FGFR             |
| 1:155975202  | <i>GBAP1</i>        | REACTOME_SIGNALING_BY_GPCR             |
| 2:170012307  | <i>STK39</i>        | REACTOME_SIGNALING_BY_GPCR             |
| 2:170028024  | <i>STK39</i>        | REACTOME_SIGNALING_BY_GPCR             |
| 2:170066424  | <i>STK39</i>        | REACTOME_SIGNALING_BY_GPCR             |
| 3:48835245   | <i>IP6K2</i>        | REACTOME_SIGNALING_BY_GPCR             |
| 3:49406095   | <i>IP6K2</i>        | REACTOME_SIGNALING_BY_GPCR             |
| 3:49424231   | <i>IP6K2</i>        | REACTOME_SIGNALING_BY_GPCR             |
| 3:49450137   | <i>IP6K2</i>        | REACTOME_SIGNALING_BY_GPCR             |
| 3:123089448  | <i>KPNA1</i>        | REACTOME_SIGNALING_BY_GPCR             |
| 3:150935203  | <i>MED12L</i>       | REACTOME_SIGNALING_BY_GPCR             |
| 3:151090424  | <i>MED12L</i>       | REACTOME_SIGNALING_BY_GPCR             |
| 3:151099733  | <i>MED12L</i>       | REACTOME_SIGNALING_BY_GPCR             |
| 4:76924571   | <i>FAM47E-STBD1</i> | REACTOME_SIGNALING_BY_GPCR             |
| 4:114424939  | <i>CAMK2D</i>       | REACTOME_SIGNALING_BY_GPCR             |
| 4:114494052  | <i>CAMK2D</i>       | REACTOME_SIGNALING_BY_GPCR             |
| 4:114529492  | <i>CAMK2D</i>       | REACTOME_SIGNALING_BY_GPCR             |
| 4:114539964  | <i>CAMK2D</i>       | REACTOME_SIGNALING_BY_GPCR             |
| 4:114597918  | <i>CAMK2D</i>       | REACTOME_SIGNALING_BY_GPCR             |
| 5:59236972   | <i>ELOVL7</i>       | REACTOME_SIGNALING_BY_GPCR             |
| 5:59490965   | <i>ELOVL7</i>       | REACTOME_SIGNALING_BY_GPCR             |
| 5:59554719   | <i>ELOVL7</i>       | REACTOME_SIGNALING_BY_GPCR             |
| 5:59705316   | <i>ELOVL7</i>       | REACTOME_SIGNALING_BY_GPCR             |
| 5:59736085   | <i>ELOVL7</i>       | REACTOME_SIGNALING_BY_GPCR             |
| 5:59812853   | <i>ELOVL7</i>       | REACTOME_SIGNALING_BY_GPCR             |
| 5:133558885  | <i>C5orf24</i>      | REACTOME_SIGNALING_BY_GPCR             |
| 6:29407378   | <i>TRIM40</i>       | REACTOME_SIGNALING_BY_GPCR             |
| 6:29412222   | <i>TRIM40</i>       | REACTOME_SIGNALING_BY_GPCR             |
| 6:29565889   | <i>TRIM40</i>       | REACTOME_SIGNALING_BY_GPCR             |
| 6:29590715   | <i>TRIM40</i>       | REACTOME_SIGNALING_BY_GPCR             |
| 8:131799767  | <i>FAM49B</i>       | REACTOME_SIGNALING_BY_GPCR             |
| 8:131845512  | <i>FAM49B</i>       | REACTOME_SIGNALING_BY_GPCR             |
| 8:131865425  | <i>FAM49B</i>       | REACTOME_SIGNALING_BY_GPCR             |
| 8:131901170  | <i>FAM49B</i>       | REACTOME_SIGNALING_BY_GPCR             |
| 10:15199347  | <i>ITGA8</i>        | REACTOME_SIGNALING_BY_GPCR             |
| 10:121054578 | <i>INPP5F</i>       | REACTOME_SIGNALING_BY_GPCR             |
| 10:121077191 | <i>INPP5F</i>       | REACTOME_SIGNALING_BY_GPCR             |
| 10:121085648 | <i>INPP5F</i>       | REACTOME_SIGNALING_BY_GPCR             |

|              |                |                                        |
|--------------|----------------|----------------------------------------|
| 10:121104943 | <i>INPP5F</i>  | REACTOME_SIGNALING_BY_GPCR             |
| 10:121114292 | <i>INPP5F</i>  | REACTOME_SIGNALING_BY_GPCR             |
| 10:121191186 | <i>INPP5F</i>  | REACTOME_SIGNALING_BY_GPCR             |
| 10:121201427 | <i>INPP5F</i>  | REACTOME_SIGNALING_BY_GPCR             |
| 10:121295884 | <i>INPP5F</i>  | REACTOME_SIGNALING_BY_GPCR             |
| 14:88472612  | <i>GALC</i>    | REACTOME_SIGNALING_BY_GPCR             |
| 16:50300511  | <i>CASC16</i>  | REACTOME_SIGNALING_BY_GPCR             |
| 16:50317039  | <i>CASC16</i>  | REACTOME_SIGNALING_BY_GPCR             |
| 17:43181287  | <i>CRHR1_2</i> | REACTOME_SIGNALING_BY_GPCR             |
| 17:43184627  | <i>CRHR1_2</i> | REACTOME_SIGNALING_BY_GPCR             |
| 17:43744203  | <i>CRHR1_2</i> | REACTOME_SIGNALING_BY_GPCR             |
| 17:43748712  | <i>CRHR1_2</i> | REACTOME_SIGNALING_BY_GPCR             |
| 17:43784228  | <i>CRHR1_2</i> | REACTOME_SIGNALING_BY_GPCR             |
| 17:43791502  | <i>CRHR1_2</i> | REACTOME_SIGNALING_BY_GPCR             |
| 17:43796210  | <i>CRHR1_2</i> | REACTOME_SIGNALING_BY_GPCR             |
| 17:43843861  | <i>CRHR1_2</i> | REACTOME_SIGNALING_BY_GPCR             |
| 17:43847503  | <i>CRHR1_2</i> | REACTOME_SIGNALING_BY_GPCR             |
| 17:43849514  | <i>CRHR1_2</i> | REACTOME_SIGNALING_BY_GPCR             |
| 17:44843651  | <i>WNT3</i>    | REACTOME_SIGNALING_BY_GPCR             |
| 17:44870978  | <i>WNT3</i>    | REACTOME_SIGNALING_BY_GPCR             |
| 17:44871422  | <i>WNT3</i>    | REACTOME_SIGNALING_BY_GPCR             |
| 17:44888209  | <i>WNT3</i>    | REACTOME_SIGNALING_BY_GPCR             |
| 17:44888715  | <i>WNT3</i>    | REACTOME_SIGNALING_BY_GPCR             |
| 17:44906949  | <i>WNT3</i>    | REACTOME_SIGNALING_BY_GPCR             |
| 17:44912901  | <i>WNT3</i>    | REACTOME_SIGNALING_BY_GPCR             |
| 17:44931399  | <i>WNT3</i>    | REACTOME_SIGNALING_BY_GPCR             |
| 17:44947756  | <i>WNT3</i>    | REACTOME_SIGNALING_BY_GPCR             |
| 19:2557113   | <i>SPPL2B</i>  | REACTOME_SIGNALING_BY_GPCR             |
| 19:2563327   | <i>SPPL2B</i>  | REACTOME_SIGNALING_BY_GPCR             |
| 19:2580057   | <i>SPPL2B</i>  | REACTOME_SIGNALING_BY_GPCR             |
| 19:2660983   | <i>SPPL2B</i>  | REACTOME_SIGNALING_BY_GPCR             |
| 19:3142784   | <i>SPPL2B</i>  | REACTOME_SIGNALING_BY_GPCR             |
| 19:3147326   | <i>SPPL2B</i>  | REACTOME_SIGNALING_BY_GPCR             |
| 20:5290081   | <i>CRLS1</i>   | REACTOME_SIGNALING_BY_GPCR             |
| 3:48835245   | <i>IP6K2</i>   | REACTOME_SIGNALING_BY_HEDGEHOG         |
| 3:123089448  | <i>KPNA1</i>   | REACTOME_SIGNALING_BY_HEDGEHOG         |
| 8:131799767  | <i>FAM49B</i>  | REACTOME_SIGNALING_BY_HEDGEHOG         |
| 8:131845512  | <i>FAM49B</i>  | REACTOME_SIGNALING_BY_HEDGEHOG         |
| 8:131865425  | <i>FAM49B</i>  | REACTOME_SIGNALING_BY_HEDGEHOG         |
| 8:131901170  | <i>FAM49B</i>  | REACTOME_SIGNALING_BY_HEDGEHOG         |
| 10:103185542 | <i>GBF1</i>    | REACTOME_SIGNALING_BY_HEDGEHOG         |
| 10:103305087 | <i>GBF1</i>    | REACTOME_SIGNALING_BY_HEDGEHOG         |
| 10:103308244 | <i>GBF1</i>    | REACTOME_SIGNALING_BY_HEDGEHOG         |
| 10:104278055 | <i>GBF1</i>    | REACTOME_SIGNALING_BY_HEDGEHOG         |
| 10:104305501 | <i>GBF1</i>    | REACTOME_SIGNALING_BY_HEDGEHOG         |
| 16:50300511  | <i>CASC16</i>  | REACTOME_SIGNALING_BY_HEDGEHOG         |
| 16:50317039  | <i>CASC16</i>  | REACTOME_SIGNALING_BY_HEDGEHOG         |
| 17:7129974   | <i>V1NB1</i>   | REACTOME_SIGNALING_BY_HIPPO            |
| 12:124219791 | <i>HIP1R</i>   | REACTOME_SIGNALING_BY_INSULIN_RECEPTOR |
| 2:102612026  | <i>MAP4K4</i>  | REACTOME_SIGNALING_BY_INTERLEUKINS     |
| 2:102621855  | <i>MAP4K4</i>  | REACTOME_SIGNALING_BY_INTERLEUKINS     |
| 2:102631503  | <i>MAP4K4</i>  | REACTOME_SIGNALING_BY_INTERLEUKINS     |
| 2:102633387  | <i>MAP4K4</i>  | REACTOME_SIGNALING_BY_INTERLEUKINS     |

|              |          |                                    |
|--------------|----------|------------------------------------|
| 2:102720323  | MAP4K4   | REACTOME_SIGNALING_BY_INTERLEUKINS |
| 2:102783052  | MAP4K4   | REACTOME_SIGNALING_BY_INTERLEUKINS |
| 2:102826146  | MAP4K4   | REACTOME_SIGNALING_BY_INTERLEUKINS |
| 2:103047986  | MAP4K4   | REACTOME_SIGNALING_BY_INTERLEUKINS |
| 2:103063855  | MAP4K4   | REACTOME_SIGNALING_BY_INTERLEUKINS |
| 2:103066346  | MAP4K4   | REACTOME_SIGNALING_BY_INTERLEUKINS |
| 4:114424939  | CAMK2D   | REACTOME_SIGNALING_BY_INTERLEUKINS |
| 4:114494052  | CAMK2D   | REACTOME_SIGNALING_BY_INTERLEUKINS |
| 4:114529492  | CAMK2D   | REACTOME_SIGNALING_BY_INTERLEUKINS |
| 4:114539964  | CAMK2D   | REACTOME_SIGNALING_BY_INTERLEUKINS |
| 4:114597918  | CAMK2D   | REACTOME_SIGNALING_BY_INTERLEUKINS |
| 5:133558885  | C5orf24  | REACTOME_SIGNALING_BY_INTERLEUKINS |
| 6:32151443   | HLA-DRB5 | REACTOME_SIGNALING_BY_INTERLEUKINS |
| 6:112137847  | FYN      | REACTOME_SIGNALING_BY_INTERLEUKINS |
| 6:112151452  | FYN      | REACTOME_SIGNALING_BY_INTERLEUKINS |
| 6:112175069  | FYN      | REACTOME_SIGNALING_BY_INTERLEUKINS |
| 8:21565088   | BIN3     | REACTOME_SIGNALING_BY_INTERLEUKINS |
| 8:21582921   | BIN3     | REACTOME_SIGNALING_BY_INTERLEUKINS |
| 8:21665306   | BIN3     | REACTOME_SIGNALING_BY_INTERLEUKINS |
| 8:21668901   | BIN3     | REACTOME_SIGNALING_BY_INTERLEUKINS |
| 10:103185542 | GBF1     | REACTOME_SIGNALING_BY_INTERLEUKINS |
| 10:103305087 | GBF1     | REACTOME_SIGNALING_BY_INTERLEUKINS |
| 10:103308244 | GBF1     | REACTOME_SIGNALING_BY_INTERLEUKINS |
| 11:83219006  | DLG2     | REACTOME_SIGNALING_BY_INTERLEUKINS |
| 11:83232915  | DLG2     | REACTOME_SIGNALING_BY_INTERLEUKINS |
| 11:83282740  | DLG2     | REACTOME_SIGNALING_BY_INTERLEUKINS |
| 11:83387273  | DLG2     | REACTOME_SIGNALING_BY_INTERLEUKINS |
| 11:83538733  | DLG2     | REACTOME_SIGNALING_BY_INTERLEUKINS |
| 11:83544472  | DLG2     | REACTOME_SIGNALING_BY_INTERLEUKINS |
| 11:83578152  | DLG2     | REACTOME_SIGNALING_BY_INTERLEUKINS |
| 11:83647657  | DLG2     | REACTOME_SIGNALING_BY_INTERLEUKINS |
| 11:83669903  | DLG2     | REACTOME_SIGNALING_BY_INTERLEUKINS |
| 11:83736246  | DLG2     | REACTOME_SIGNALING_BY_INTERLEUKINS |
| 11:83762918  | DLG2     | REACTOME_SIGNALING_BY_INTERLEUKINS |
| 11:83823752  | DLG2     | REACTOME_SIGNALING_BY_INTERLEUKINS |
| 11:83839992  | DLG2     | REACTOME_SIGNALING_BY_INTERLEUKINS |
| 11:84104763  | DLG2     | REACTOME_SIGNALING_BY_INTERLEUKINS |
| 11:84169039  | DLG2     | REACTOME_SIGNALING_BY_INTERLEUKINS |
| 11:84221628  | DLG2     | REACTOME_SIGNALING_BY_INTERLEUKINS |
| 11:84312008  | DLG2     | REACTOME_SIGNALING_BY_INTERLEUKINS |
| 11:84324361  | DLG2     | REACTOME_SIGNALING_BY_INTERLEUKINS |
| 11:84360346  | DLG2     | REACTOME_SIGNALING_BY_INTERLEUKINS |
| 11:84403409  | DLG2     | REACTOME_SIGNALING_BY_INTERLEUKINS |
| 15:61016235  | VPS13C   | REACTOME_SIGNALING_BY_INTERLEUKINS |
| 15:61065568  | VPS13C   | REACTOME_SIGNALING_BY_INTERLEUKINS |
| 15:61094298  | VPS13C   | REACTOME_SIGNALING_BY_INTERLEUKINS |
| 15:61140736  | VPS13C   | REACTOME_SIGNALING_BY_INTERLEUKINS |
| 15:61142062  | VPS13C   | REACTOME_SIGNALING_BY_INTERLEUKINS |
| 15:61162571  | VPS13C   | REACTOME_SIGNALING_BY_INTERLEUKINS |
| 15:61191617  | VPS13C   | REACTOME_SIGNALING_BY_INTERLEUKINS |
| 15:61195427  | VPS13C   | REACTOME_SIGNALING_BY_INTERLEUKINS |
| 15:61221682  | VPS13C   | REACTOME_SIGNALING_BY_INTERLEUKINS |
| 15:61298486  | VPS13C   | REACTOME_SIGNALING_BY_INTERLEUKINS |

|             |          |                                                             |
|-------------|----------|-------------------------------------------------------------|
| 15:61375480 | VPS13C   | REACTOME_SIGNALING_BY_INTERLEUKINS                          |
| 15:61434581 | VPS13C   | REACTOME_SIGNALING_BY_INTERLEUKINS                          |
| 15:61467078 | VPS13C   | REACTOME_SIGNALING_BY_INTERLEUKINS                          |
| 15:61470808 | VPS13C   | REACTOME_SIGNALING_BY_INTERLEUKINS                          |
| 15:61500263 | VPS13C   | REACTOME_SIGNALING_BY_INTERLEUKINS                          |
| 16:31370452 | SETD1A   | REACTOME_SIGNALING_BY_INTERLEUKINS                          |
| 16:50730088 | CASC16   | REACTOME_SIGNALING_BY_INTERLEUKINS                          |
| 16:50730446 | CASC16   | REACTOME_SIGNALING_BY_INTERLEUKINS                          |
| 16:50745926 | CASC16   | REACTOME_SIGNALING_BY_INTERLEUKINS                          |
| 17:7101771  | V1NB1    | REACTOME_SIGNALING_BY_INTERLEUKINS                          |
| 17:7578671  | V1NB1    | REACTOME_SIGNALING_BY_INTERLEUKINS                          |
| 17:40392358 | RETREG3  | REACTOME_SIGNALING_BY_INTERLEUKINS                          |
| 17:41845031 | FAM171A2 | REACTOME_SIGNALING_BY_INTERLEUKINS                          |
| 17:42454243 | FAM171A2 | REACTOME_SIGNALING_BY_INTERLEUKINS                          |
| 17:40392358 | RETREG3  | REACTOME_SIGNALING_BY_LEPTIN                                |
| 3:49162284  | IP6K2    | REACTOME_SIGNALING_BY_MET                                   |
| 3:49162583  | IP6K2    | REACTOME_SIGNALING_BY_MET                                   |
| 6:33153528  | HLA-DRB5 | REACTOME_SIGNALING_BY_MET                                   |
| 6:112494762 | FYN      | REACTOME_SIGNALING_BY_MET                                   |
| 6:112531401 | FYN      | REACTOME_SIGNALING_BY_MET                                   |
| 6:112561154 | FYN      | REACTOME_SIGNALING_BY_MET                                   |
| 6:112561430 | FYN      | REACTOME_SIGNALING_BY_MET                                   |
| 9:17579690  | SH3GL2_2 | REACTOME_SIGNALING_BY_MET                                   |
| 9:17587160  | SH3GL2_2 | REACTOME_SIGNALING_BY_MET                                   |
| 9:17609302  | SH3GL2_2 | REACTOME_SIGNALING_BY_MET                                   |
| 9:17626762  | SH3GL2_2 | REACTOME_SIGNALING_BY_MET                                   |
| 9:17627444  | SH3GL2_2 | REACTOME_SIGNALING_BY_MET                                   |
| 9:17642664  | SH3GL2_2 | REACTOME_SIGNALING_BY_MET                                   |
| 9:17710876  | SH3GL2_2 | REACTOME_SIGNALING_BY_MET                                   |
| 9:17732590  | SH3GL2_2 | REACTOME_SIGNALING_BY_MET                                   |
| 9:17737514  | SH3GL2_2 | REACTOME_SIGNALING_BY_MET                                   |
| 9:17758945  | SH3GL2_2 | REACTOME_SIGNALING_BY_MET                                   |
| 4:114424939 | CAMK2D   | REACTOME_SIGNALING_BY_MODERATE_KINASE_ACTIVITY_BRAF_MUTANTS |
| 4:114494052 | CAMK2D   | REACTOME_SIGNALING_BY_MODERATE_KINASE_ACTIVITY_BRAF_MUTANTS |
| 4:114529492 | CAMK2D   | REACTOME_SIGNALING_BY_MODERATE_KINASE_ACTIVITY_BRAF_MUTANTS |
| 4:114539964 | CAMK2D   | REACTOME_SIGNALING_BY_MODERATE_KINASE_ACTIVITY_BRAF_MUTANTS |
| 4:114597918 | CAMK2D   | REACTOME_SIGNALING_BY_MODERATE_KINASE_ACTIVITY_BRAF_MUTANTS |
| 17:42454243 | FAM171A2 | REACTOME_SIGNALING_BY_MODERATE_KINASE_ACTIVITY_BRAF_MUTANTS |
| 1:226074321 | ITPKB    | REACTOME_SIGNALING_BY_NODAL                                 |
| 3:49406095  | IP6K2    | REACTOME_SIGNALING_BY_NON_RECEPTOR_TYROSINE_KINASES         |
| 3:49424231  | IP6K2    | REACTOME_SIGNALING_BY_NON_RECEPTOR_TYROSINE_KINASES         |
| 3:49450137  | IP6K2    | REACTOME_SIGNALING_BY_NON_RECEPTOR_TYROSINE_KINASES         |
| 7:23277372  | GPNMB    | REACTOME_SIGNALING_BY_NON_RECEPTOR_TYROSINE_KINASES         |
| 7:23282960  | GPNMB    | REACTOME_SIGNALING_BY_NON_RECEPTOR_TYROSINE_KINASES         |
| 7:23293746  | GPNMB    | REACTOME_SIGNALING_BY_NON_RECEPTOR_TYROSINE_KINASES         |
| 7:23313171  | GPNMB    | REACTOME_SIGNALING_BY_NON_RECEPTOR_TYROSINE_KINASES         |
| 12:40614434 | LRRK2_2  | REACTOME_SIGNALING_BY_NON_RECEPTOR_TYROSINE_KINASES         |
| 12:40614656 | LRRK2_2  | REACTOME_SIGNALING_BY_NON_RECEPTOR_TYROSINE_KINASES         |
| 12:40617231 | LRRK2_2  | REACTOME_SIGNALING_BY_NON_RECEPTOR_TYROSINE_KINASES         |
| 12:40653993 | LRRK2_2  | REACTOME_SIGNALING_BY_NON_RECEPTOR_TYROSINE_KINASES         |
| 12:40698422 | LRRK2_2  | REACTOME_SIGNALING_BY_NON_RECEPTOR_TYROSINE_KINASES         |
| 12:40707861 | LRRK2_2  | REACTOME_SIGNALING_BY_NON_RECEPTOR_TYROSINE_KINASES         |
| 12:40734202 | LRRK2_2  | REACTOME_SIGNALING_BY_NON_RECEPTOR_TYROSINE_KINASES         |

|             |                 |                                                     |
|-------------|-----------------|-----------------------------------------------------|
| 12:40753796 | <i>LRRK2_2</i>  | REACTOME_SIGNALING_BY_NON_RECEPTOR_TYROSINE_KINASES |
| 1:227067656 | <i>ITPKB</i>    | REACTOME_SIGNALING_BY_NOTCH1_IN_CANCER              |
| 1:227067656 | <i>ITPKB</i>    | REACTOME_SIGNALING_BY_NOTCH1                        |
| 12:41144387 | <i>LRRK2_2</i>  | REACTOME_SIGNALING_BY_NOTCH1                        |
| 12:41147295 | <i>LRRK2_2</i>  | REACTOME_SIGNALING_BY_NOTCH1                        |
| 12:41195135 | <i>LRRK2_2</i>  | REACTOME_SIGNALING_BY_NOTCH1                        |
| 12:41251554 | <i>LRRK2_2</i>  | REACTOME_SIGNALING_BY_NOTCH1                        |
| 12:41255129 | <i>LRRK2_2</i>  | REACTOME_SIGNALING_BY_NOTCH1                        |
| 12:41297969 | <i>LRRK2_2</i>  | REACTOME_SIGNALING_BY_NOTCH1                        |
| 12:41407403 | <i>LRRK2_2</i>  | REACTOME_SIGNALING_BY_NOTCH1                        |
| 19:3008151  | <i>SPPL2B</i>   | REACTOME_SIGNALING_BY_NOTCH1                        |
| 19:3024077  | <i>SPPL2B</i>   | REACTOME_SIGNALING_BY_NOTCH1                        |
| 1:227067656 | <i>ITPKB</i>    | REACTOME_SIGNALING_BY_NOTCH2                        |
| 12:41144387 | <i>LRRK2_2</i>  | REACTOME_SIGNALING_BY_NOTCH2                        |
| 12:41147295 | <i>LRRK2_2</i>  | REACTOME_SIGNALING_BY_NOTCH2                        |
| 12:41195135 | <i>LRRK2_2</i>  | REACTOME_SIGNALING_BY_NOTCH2                        |
| 12:41251554 | <i>LRRK2_2</i>  | REACTOME_SIGNALING_BY_NOTCH2                        |
| 12:41255129 | <i>LRRK2_2</i>  | REACTOME_SIGNALING_BY_NOTCH2                        |
| 12:41297969 | <i>LRRK2_2</i>  | REACTOME_SIGNALING_BY_NOTCH2                        |
| 12:41407403 | <i>LRRK2_2</i>  | REACTOME_SIGNALING_BY_NOTCH2                        |
| 1:227067656 | <i>ITPKB</i>    | REACTOME_SIGNALING_BY_NOTCH3                        |
| 1:227067656 | <i>ITPKB</i>    | REACTOME_SIGNALING_BY_NOTCH4                        |
| 6:32179319  | <i>HLA-DRB5</i> | REACTOME_SIGNALING_BY_NOTCH4                        |
| 6:32186193  | <i>HLA-DRB5</i> | REACTOME_SIGNALING_BY_NOTCH4                        |
| 1:227067656 | <i>ITPKB</i>    | REACTOME_SIGNALING_BY_NOTCH                         |
| 6:32179319  | <i>HLA-DRB5</i> | REACTOME_SIGNALING_BY_NOTCH                         |
| 6:32186193  | <i>HLA-DRB5</i> | REACTOME_SIGNALING_BY_NOTCH                         |
| 12:41144387 | <i>LRRK2_2</i>  | REACTOME_SIGNALING_BY_NOTCH                         |
| 12:41147295 | <i>LRRK2_2</i>  | REACTOME_SIGNALING_BY_NOTCH                         |
| 12:41195135 | <i>LRRK2_2</i>  | REACTOME_SIGNALING_BY_NOTCH                         |
| 12:41251554 | <i>LRRK2_2</i>  | REACTOME_SIGNALING_BY_NOTCH                         |
| 12:41255129 | <i>LRRK2_2</i>  | REACTOME_SIGNALING_BY_NOTCH                         |
| 12:41297969 | <i>LRRK2_2</i>  | REACTOME_SIGNALING_BY_NOTCH                         |
| 12:41407403 | <i>LRRK2_2</i>  | REACTOME_SIGNALING_BY_NOTCH                         |
| 17:7578671  | <i>V1NB1</i>    | REACTOME_SIGNALING_BY_NOTCH                         |
| 19:3008151  | <i>SPPL2B</i>   | REACTOME_SIGNALING_BY_NOTCH                         |
| 19:3024077  | <i>SPPL2B</i>   | REACTOME_SIGNALING_BY_NOTCH                         |
| 1:171837985 | <i>VAMP4</i>    | REACTOME_SIGNALING_BY_NTRK1_TRKA                    |
| 1:171945488 | <i>VAMP4</i>    | REACTOME_SIGNALING_BY_NTRK1_TRKA                    |
| 1:172137119 | <i>VAMP4</i>    | REACTOME_SIGNALING_BY_NTRK1_TRKA                    |
| 1:172386261 | <i>VAMP4</i>    | REACTOME_SIGNALING_BY_NTRK1_TRKA                    |
| 3:49406095  | <i>IP6K2</i>    | REACTOME_SIGNALING_BY_NTRK1_TRKA                    |
| 3:49424231  | <i>IP6K2</i>    | REACTOME_SIGNALING_BY_NTRK1_TRKA                    |
| 3:49450137  | <i>IP6K2</i>    | REACTOME_SIGNALING_BY_NTRK1_TRKA                    |
| 5:133558885 | <i>C5orf24</i>  | REACTOME_SIGNALING_BY_NTRK1_TRKA                    |
| 9:17579690  | <i>SH3GL2_2</i> | REACTOME_SIGNALING_BY_NTRK1_TRKA                    |
| 9:17587160  | <i>SH3GL2_2</i> | REACTOME_SIGNALING_BY_NTRK1_TRKA                    |
| 9:17609302  | <i>SH3GL2_2</i> | REACTOME_SIGNALING_BY_NTRK1_TRKA                    |
| 9:17626762  | <i>SH3GL2_2</i> | REACTOME_SIGNALING_BY_NTRK1_TRKA                    |
| 9:17627444  | <i>SH3GL2_2</i> | REACTOME_SIGNALING_BY_NTRK1_TRKA                    |
| 9:17642664  | <i>SH3GL2_2</i> | REACTOME_SIGNALING_BY_NTRK1_TRKA                    |
| 9:17710876  | <i>SH3GL2_2</i> | REACTOME_SIGNALING_BY_NTRK1_TRKA                    |
| 9:17732590  | <i>SH3GL2_2</i> | REACTOME_SIGNALING_BY_NTRK1_TRKA                    |

|             |                 |                                         |
|-------------|-----------------|-----------------------------------------|
| 9:17737514  | <i>SH3GL2_2</i> | REACTOME_SIGNALING_BY_NTRK1_TRKA        |
| 9:17758945  | <i>SH3GL2_2</i> | REACTOME_SIGNALING_BY_NTRK1_TRKA        |
| 17:41845031 | <i>FAM171A2</i> | REACTOME_SIGNALING_BY_NTRK1_TRKA        |
| 18:40409806 | <i>RIT2</i>     | REACTOME_SIGNALING_BY_NTRK1_TRKA        |
| 18:40494893 | <i>RIT2</i>     | REACTOME_SIGNALING_BY_NTRK1_TRKA        |
| 18:40543738 | <i>RIT2</i>     | REACTOME_SIGNALING_BY_NTRK1_TRKA        |
| 18:40612823 | <i>RIT2</i>     | REACTOME_SIGNALING_BY_NTRK1_TRKA        |
| 18:40649778 | <i>RIT2</i>     | REACTOME_SIGNALING_BY_NTRK1_TRKA        |
| 18:40671720 | <i>RIT2</i>     | REACTOME_SIGNALING_BY_NTRK1_TRKA        |
| 18:40673380 | <i>RIT2</i>     | REACTOME_SIGNALING_BY_NTRK1_TRKA        |
| 6:112137847 | <i>FYN</i>      | REACTOME_SIGNALING_BY_NTRK2_TRKB        |
| 6:112151452 | <i>FYN</i>      | REACTOME_SIGNALING_BY_NTRK2_TRKB        |
| 6:112175069 | <i>FYN</i>      | REACTOME_SIGNALING_BY_NTRK2_TRKB        |
| 1:171837985 | <i>VAMP4</i>    | REACTOME_SIGNALING_BY_NTRKS             |
| 1:171945488 | <i>VAMP4</i>    | REACTOME_SIGNALING_BY_NTRKS             |
| 1:172137119 | <i>VAMP4</i>    | REACTOME_SIGNALING_BY_NTRKS             |
| 1:172386261 | <i>VAMP4</i>    | REACTOME_SIGNALING_BY_NTRKS             |
| 3:49406095  | <i>IP6K2</i>    | REACTOME_SIGNALING_BY_NTRKS             |
| 3:49424231  | <i>IP6K2</i>    | REACTOME_SIGNALING_BY_NTRKS             |
| 3:49450137  | <i>IP6K2</i>    | REACTOME_SIGNALING_BY_NTRKS             |
| 5:133558885 | <i>C5orf24</i>  | REACTOME_SIGNALING_BY_NTRKS             |
| 6:112137847 | <i>FYN</i>      | REACTOME_SIGNALING_BY_NTRKS             |
| 6:112151452 | <i>FYN</i>      | REACTOME_SIGNALING_BY_NTRKS             |
| 6:112175069 | <i>FYN</i>      | REACTOME_SIGNALING_BY_NTRKS             |
| 9:17579690  | <i>SH3GL2_2</i> | REACTOME_SIGNALING_BY_NTRKS             |
| 9:17587160  | <i>SH3GL2_2</i> | REACTOME_SIGNALING_BY_NTRKS             |
| 9:17609302  | <i>SH3GL2_2</i> | REACTOME_SIGNALING_BY_NTRKS             |
| 9:17626762  | <i>SH3GL2_2</i> | REACTOME_SIGNALING_BY_NTRKS             |
| 9:17627444  | <i>SH3GL2_2</i> | REACTOME_SIGNALING_BY_NTRKS             |
| 9:17642664  | <i>SH3GL2_2</i> | REACTOME_SIGNALING_BY_NTRKS             |
| 9:17710876  | <i>SH3GL2_2</i> | REACTOME_SIGNALING_BY_NTRKS             |
| 9:17732590  | <i>SH3GL2_2</i> | REACTOME_SIGNALING_BY_NTRKS             |
| 9:17737514  | <i>SH3GL2_2</i> | REACTOME_SIGNALING_BY_NTRKS             |
| 9:17758945  | <i>SH3GL2_2</i> | REACTOME_SIGNALING_BY_NTRKS             |
| 17:41845031 | <i>FAM171A2</i> | REACTOME_SIGNALING_BY_NTRKS             |
| 18:40409806 | <i>RIT2</i>     | REACTOME_SIGNALING_BY_NTRKS             |
| 18:40494893 | <i>RIT2</i>     | REACTOME_SIGNALING_BY_NTRKS             |
| 18:40543738 | <i>RIT2</i>     | REACTOME_SIGNALING_BY_NTRKS             |
| 18:40612823 | <i>RIT2</i>     | REACTOME_SIGNALING_BY_NTRKS             |
| 18:40649778 | <i>RIT2</i>     | REACTOME_SIGNALING_BY_NTRKS             |
| 18:40671720 | <i>RIT2</i>     | REACTOME_SIGNALING_BY_NTRKS             |
| 18:40673380 | <i>RIT2</i>     | REACTOME_SIGNALING_BY_NTRKS             |
| 14:38061742 | <i>MIPOL1</i>   | REACTOME_SIGNALING_BY_NUCLEAR_RECEPTORS |
| 19:2557113  | <i>SPPL2B</i>   | REACTOME_SIGNALING_BY_NUCLEAR_RECEPTORS |
| 19:2563327  | <i>SPPL2B</i>   | REACTOME_SIGNALING_BY_NUCLEAR_RECEPTORS |
| 19:2580057  | <i>SPPL2B</i>   | REACTOME_SIGNALING_BY_NUCLEAR_RECEPTORS |
| 19:2660983  | <i>SPPL2B</i>   | REACTOME_SIGNALING_BY_NUCLEAR_RECEPTORS |
| 17:40392358 | <i>RETREG3</i>  | REACTOME_SIGNALING_BY_PDGF              |
| 4:114424939 | <i>CAMK2D</i>   | REACTOME_SIGNALING_BY_RAS_MUTANTS       |
| 4:114494052 | <i>CAMK2D</i>   | REACTOME_SIGNALING_BY_RAS_MUTANTS       |
| 4:114529492 | <i>CAMK2D</i>   | REACTOME_SIGNALING_BY_RAS_MUTANTS       |
| 4:114539964 | <i>CAMK2D</i>   | REACTOME_SIGNALING_BY_RAS_MUTANTS       |
| 4:114597918 | <i>CAMK2D</i>   | REACTOME_SIGNALING_BY_RAS_MUTANTS       |

|              |                 |                                                 |
|--------------|-----------------|-------------------------------------------------|
| 17:42454243  | <i>FAM171A2</i> | REACTOME_SIGNALING_BY_RAS_MUTANTS               |
| 1:171837985  | <i>VAMP4</i>    | REACTOME_SIGNALING_BY_RECEPTOR_TYROSINE_KINASES |
| 1:171945488  | <i>VAMP4</i>    | REACTOME_SIGNALING_BY_RECEPTOR_TYROSINE_KINASES |
| 1:172137119  | <i>VAMP4</i>    | REACTOME_SIGNALING_BY_RECEPTOR_TYROSINE_KINASES |
| 1:172386261  | <i>VAMP4</i>    | REACTOME_SIGNALING_BY_RECEPTOR_TYROSINE_KINASES |
| 1:227067656  | <i>ITPKB</i>    | REACTOME_SIGNALING_BY_RECEPTOR_TYROSINE_KINASES |
| 3:49162284   | <i>IP6K2</i>    | REACTOME_SIGNALING_BY_RECEPTOR_TYROSINE_KINASES |
| 3:49162583   | <i>IP6K2</i>    | REACTOME_SIGNALING_BY_RECEPTOR_TYROSINE_KINASES |
| 3:49406095   | <i>IP6K2</i>    | REACTOME_SIGNALING_BY_RECEPTOR_TYROSINE_KINASES |
| 3:49424231   | <i>IP6K2</i>    | REACTOME_SIGNALING_BY_RECEPTOR_TYROSINE_KINASES |
| 3:49450137   | <i>IP6K2</i>    | REACTOME_SIGNALING_BY_RECEPTOR_TYROSINE_KINASES |
| 5:133558885  | <i>C5orf24</i>  | REACTOME_SIGNALING_BY_RECEPTOR_TYROSINE_KINASES |
| 6:33153528   | <i>HLA-DRB5</i> | REACTOME_SIGNALING_BY_RECEPTOR_TYROSINE_KINASES |
| 6:112137847  | <i>FYN</i>      | REACTOME_SIGNALING_BY_RECEPTOR_TYROSINE_KINASES |
| 6:112151452  | <i>FYN</i>      | REACTOME_SIGNALING_BY_RECEPTOR_TYROSINE_KINASES |
| 6:112175069  | <i>FYN</i>      | REACTOME_SIGNALING_BY_RECEPTOR_TYROSINE_KINASES |
| 6:112494762  | <i>FYN</i>      | REACTOME_SIGNALING_BY_RECEPTOR_TYROSINE_KINASES |
| 6:112531401  | <i>FYN</i>      | REACTOME_SIGNALING_BY_RECEPTOR_TYROSINE_KINASES |
| 6:112561154  | <i>FYN</i>      | REACTOME_SIGNALING_BY_RECEPTOR_TYROSINE_KINASES |
| 6:112561430  | <i>FYN</i>      | REACTOME_SIGNALING_BY_RECEPTOR_TYROSINE_KINASES |
| 9:17579690   | <i>SH3GL2_2</i> | REACTOME_SIGNALING_BY_RECEPTOR_TYROSINE_KINASES |
| 9:17587160   | <i>SH3GL2_2</i> | REACTOME_SIGNALING_BY_RECEPTOR_TYROSINE_KINASES |
| 9:17609302   | <i>SH3GL2_2</i> | REACTOME_SIGNALING_BY_RECEPTOR_TYROSINE_KINASES |
| 9:17626762   | <i>SH3GL2_2</i> | REACTOME_SIGNALING_BY_RECEPTOR_TYROSINE_KINASES |
| 9:17627444   | <i>SH3GL2_2</i> | REACTOME_SIGNALING_BY_RECEPTOR_TYROSINE_KINASES |
| 9:17642664   | <i>SH3GL2_2</i> | REACTOME_SIGNALING_BY_RECEPTOR_TYROSINE_KINASES |
| 9:17710876   | <i>SH3GL2_2</i> | REACTOME_SIGNALING_BY_RECEPTOR_TYROSINE_KINASES |
| 9:17732590   | <i>SH3GL2_2</i> | REACTOME_SIGNALING_BY_RECEPTOR_TYROSINE_KINASES |
| 9:17737514   | <i>SH3GL2_2</i> | REACTOME_SIGNALING_BY_RECEPTOR_TYROSINE_KINASES |
| 9:17758945   | <i>SH3GL2_2</i> | REACTOME_SIGNALING_BY_RECEPTOR_TYROSINE_KINASES |
| 12:124219791 | <i>HIP1R</i>    | REACTOME_SIGNALING_BY_RECEPTOR_TYROSINE_KINASES |
| 17:7101771   | <i>V1NB1</i>    | REACTOME_SIGNALING_BY_RECEPTOR_TYROSINE_KINASES |
| 17:39883520  | <i>RETREG3</i>  | REACTOME_SIGNALING_BY_RECEPTOR_TYROSINE_KINASES |
| 17:40392358  | <i>RETREG3</i>  | REACTOME_SIGNALING_BY_RECEPTOR_TYROSINE_KINASES |
| 17:41845031  | <i>FAM171A2</i> | REACTOME_SIGNALING_BY_RECEPTOR_TYROSINE_KINASES |
| 17:42990894  | <i>CRHR1_2</i>  | REACTOME_SIGNALING_BY_RECEPTOR_TYROSINE_KINASES |
| 18:40409806  | <i>RIT2</i>     | REACTOME_SIGNALING_BY_RECEPTOR_TYROSINE_KINASES |
| 18:40494893  | <i>RIT2</i>     | REACTOME_SIGNALING_BY_RECEPTOR_TYROSINE_KINASES |
| 18:40543738  | <i>RIT2</i>     | REACTOME_SIGNALING_BY_RECEPTOR_TYROSINE_KINASES |
| 18:40612823  | <i>RIT2</i>     | REACTOME_SIGNALING_BY_RECEPTOR_TYROSINE_KINASES |
| 18:40649778  | <i>RIT2</i>     | REACTOME_SIGNALING_BY_RECEPTOR_TYROSINE_KINASES |
| 18:40671720  | <i>RIT2</i>     | REACTOME_SIGNALING_BY_RECEPTOR_TYROSINE_KINASES |
| 18:40673380  | <i>RIT2</i>     | REACTOME_SIGNALING_BY_RECEPTOR_TYROSINE_KINASES |
| 1:155975202  | <i>GBAP1</i>    | REACTOME_SIGNALING_BY_RHO_GTPASES               |
| 1:161035780  | <i>FCGR2A</i>   | REACTOME_SIGNALING_BY_RHO_GTPASES               |
| 2:169747216  | <i>STK39</i>    | REACTOME_SIGNALING_BY_RHO_GTPASES               |
| 3:49406095   | <i>IP6K2</i>    | REACTOME_SIGNALING_BY_RHO_GTPASES               |
| 3:49424231   | <i>IP6K2</i>    | REACTOME_SIGNALING_BY_RHO_GTPASES               |
| 3:49450137   | <i>IP6K2</i>    | REACTOME_SIGNALING_BY_RHO_GTPASES               |
| 4:89711319   | <i>SNCA_2</i>   | REACTOME_SIGNALING_BY_RHO_GTPASES               |
| 4:89740128   | <i>SNCA_2</i>   | REACTOME_SIGNALING_BY_RHO_GTPASES               |
| 4:90002389   | <i>SNCA_2</i>   | REACTOME_SIGNALING_BY_RHO_GTPASES               |
| 5:59958372   | <i>ELOVL7</i>   | REACTOME_SIGNALING_BY_RHO_GTPASES               |

|              |                |                                                 |
|--------------|----------------|-------------------------------------------------|
| 5:133558885  | <i>C5orf24</i> | REACTOME_SIGNALING_BY_RHO_GTPASES               |
| 12:122816734 | <i>HIP1R</i>   | REACTOME_SIGNALING_BY_RHO_GTPASES               |
| 12:122817580 | <i>HIP1R</i>   | REACTOME_SIGNALING_BY_RHO_GTPASES               |
| 12:122853197 | <i>HIP1R</i>   | REACTOME_SIGNALING_BY_RHO_GTPASES               |
| 12:123057792 | <i>HIP1R</i>   | REACTOME_SIGNALING_BY_RHO_GTPASES               |
| 12:123110365 | <i>HIP1R</i>   | REACTOME_SIGNALING_BY_RHO_GTPASES               |
| 12:123110785 | <i>HIP1R</i>   | REACTOME_SIGNALING_BY_RHO_GTPASES               |
| 14:56110265  | <i>GCH1</i>    | REACTOME_SIGNALING_BY_RHO_GTPASES               |
| 17:7101771   | <i>V1NB1</i>   | REACTOME_SIGNALING_BY_RHO_GTPASES               |
| 17:7129974   | <i>V1NB1</i>   | REACTOME_SIGNALING_BY_RHO_GTPASES               |
| 17:43302259  | <i>CRHR1_2</i> | REACTOME_SIGNALING_BY_RHO_GTPASES               |
| 17:43472507  | <i>CRHR1_2</i> | REACTOME_SIGNALING_BY_RHO_GTPASES               |
| 3:48835245   | <i>IP6K2</i>   | REACTOME_SIGNALING_BY_ROBO_RECEPTORS            |
| 3:49406095   | <i>IP6K2</i>   | REACTOME_SIGNALING_BY_ROBO_RECEPTORS            |
| 3:49424231   | <i>IP6K2</i>   | REACTOME_SIGNALING_BY_ROBO_RECEPTORS            |
| 3:49450137   | <i>IP6K2</i>   | REACTOME_SIGNALING_BY_ROBO_RECEPTORS            |
| 3:49561208   | <i>IP6K2</i>   | REACTOME_SIGNALING_BY_ROBO_RECEPTORS            |
| 6:112137847  | <i>FYN</i>     | REACTOME_SIGNALING_BY_SCF_KIT                   |
| 6:112151452  | <i>FYN</i>     | REACTOME_SIGNALING_BY_SCF_KIT                   |
| 6:112175069  | <i>FYN</i>     | REACTOME_SIGNALING_BY_SCF_KIT                   |
| 17:40392358  | <i>RETREG3</i> | REACTOME_SIGNALING_BY_SCF_KIT                   |
| 1:226568665  | <i>ITPKB</i>   | REACTOME_SIGNALING_BY_TGF_BETA_FAMILY_MEMBERS   |
| 2:135708115  | <i>TMEM163</i> | REACTOME_SIGNALING_BY_TGF_BETA_FAMILY_MEMBERS   |
| 3:49406095   | <i>IP6K2</i>   | REACTOME_SIGNALING_BY_TGF_BETA_FAMILY_MEMBERS   |
| 3:49424231   | <i>IP6K2</i>   | REACTOME_SIGNALING_BY_TGF_BETA_FAMILY_MEMBERS   |
| 3:49450137   | <i>IP6K2</i>   | REACTOME_SIGNALING_BY_TGF_BETA_FAMILY_MEMBERS   |
| 19:2251817   | <i>SPPL2B</i>  | REACTOME_SIGNALING_BY_TGF_BETA_FAMILY_MEMBERS   |
| 1:226568665  | <i>ITPKB</i>   | REACTOME_SIGNALING_BY_TGF_BETA_RECEPTOR_COMPLEX |
| 2:135708115  | <i>TMEM163</i> | REACTOME_SIGNALING_BY_TGF_BETA_RECEPTOR_COMPLEX |
| 3:49406095   | <i>IP6K2</i>   | REACTOME_SIGNALING_BY_TGF_BETA_RECEPTOR_COMPLEX |
| 3:49424231   | <i>IP6K2</i>   | REACTOME_SIGNALING_BY_TGF_BETA_RECEPTOR_COMPLEX |
| 3:49450137   | <i>IP6K2</i>   | REACTOME_SIGNALING_BY_TGF_BETA_RECEPTOR_COMPLEX |
| 6:112137847  | <i>FYN</i>     | REACTOME_SIGNALING_BY_THE_B_CELL_RECEPTOR_BCR   |
| 6:112151452  | <i>FYN</i>     | REACTOME_SIGNALING_BY_THE_B_CELL_RECEPTOR_BCR   |
| 6:112175069  | <i>FYN</i>     | REACTOME_SIGNALING_BY_THE_B_CELL_RECEPTOR_BCR   |
| 8:11353586   | <i>CTSB</i>    | REACTOME_SIGNALING_BY_THE_B_CELL_RECEPTOR_BCR   |
| 8:11363667   | <i>CTSB</i>    | REACTOME_SIGNALING_BY_THE_B_CELL_RECEPTOR_BCR   |
| 8:11381148   | <i>CTSB</i>    | REACTOME_SIGNALING_BY_THE_B_CELL_RECEPTOR_BCR   |
| 10:103185542 | <i>GBF1</i>    | REACTOME_SIGNALING_BY_THE_B_CELL_RECEPTOR_BCR   |
| 10:103305087 | <i>GBF1</i>    | REACTOME_SIGNALING_BY_THE_B_CELL_RECEPTOR_BCR   |
| 10:103308244 | <i>GBF1</i>    | REACTOME_SIGNALING_BY_THE_B_CELL_RECEPTOR_BCR   |
| 3:49406095   | <i>IP6K2</i>   | REACTOME_SIGNALING_BY_VEGF                      |
| 3:49424231   | <i>IP6K2</i>   | REACTOME_SIGNALING_BY_VEGF                      |
| 3:49450137   | <i>IP6K2</i>   | REACTOME_SIGNALING_BY_VEGF                      |
| 6:112137847  | <i>FYN</i>     | REACTOME_SIGNALING_BY_VEGF                      |
| 6:112151452  | <i>FYN</i>     | REACTOME_SIGNALING_BY_VEGF                      |
| 6:112175069  | <i>FYN</i>     | REACTOME_SIGNALING_BY_VEGF                      |
| 17:39883520  | <i>RETREG3</i> | REACTOME_SIGNALING_BY_VEGF                      |
| 5:133558885  | <i>C5orf24</i> | REACTOME_SIGNALING_BY_WNT_IN_CANCER             |
| 3:49406095   | <i>IP6K2</i>   | REACTOME_SIGNALING_BY_WNT                       |
| 3:49424231   | <i>IP6K2</i>   | REACTOME_SIGNALING_BY_WNT                       |
| 3:49450137   | <i>IP6K2</i>   | REACTOME_SIGNALING_BY_WNT                       |
| 5:133558885  | <i>C5orf24</i> | REACTOME_SIGNALING_BY_WNT                       |

|              |                 |                                               |
|--------------|-----------------|-----------------------------------------------|
| 10:103185542 | <i>GBF1</i>     | REACTOME_SIGNALING_BY_WNT                     |
| 10:103305087 | <i>GBF1</i>     | REACTOME_SIGNALING_BY_WNT                     |
| 10:103308244 | <i>GBF1</i>     | REACTOME_SIGNALING_BY_WNT                     |
| 17:7129974   | <i>V1NB1</i>    | REACTOME_SIGNALING_BY_WNT                     |
| 17:44843651  | <i>WNT3</i>     | REACTOME_SIGNALING_BY_WNT                     |
| 17:44870978  | <i>WNT3</i>     | REACTOME_SIGNALING_BY_WNT                     |
| 17:44871422  | <i>WNT3</i>     | REACTOME_SIGNALING_BY_WNT                     |
| 17:44888209  | <i>WNT3</i>     | REACTOME_SIGNALING_BY_WNT                     |
| 17:44888715  | <i>WNT3</i>     | REACTOME_SIGNALING_BY_WNT                     |
| 17:44906949  | <i>WNT3</i>     | REACTOME_SIGNALING_BY_WNT                     |
| 17:44912901  | <i>WNT3</i>     | REACTOME_SIGNALING_BY_WNT                     |
| 17:44931399  | <i>WNT3</i>     | REACTOME_SIGNALING_BY_WNT                     |
| 17:44947756  | <i>WNT3</i>     | REACTOME_SIGNALING_BY_WNT                     |
| 19:2557113   | <i>SPPL2B</i>   | REACTOME_SIGNALING_BY_WNT                     |
| 19:2563327   | <i>SPPL2B</i>   | REACTOME_SIGNALING_BY_WNT                     |
| 19:2580057   | <i>SPPL2B</i>   | REACTOME_SIGNALING_BY_WNT                     |
| 19:2660983   | <i>SPPL2B</i>   | REACTOME_SIGNALING_BY_WNT                     |
| 19:3008151   | <i>SPPL2B</i>   | REACTOME_SIGNALING_BY_WNT                     |
| 19:3024077   | <i>SPPL2B</i>   | REACTOME_SIGNALING_BY_WNT                     |
| 18:40409806  | <i>RIT2</i>     | REACTOME_SIGNALLING_TO_ERKS                   |
| 18:40494893  | <i>RIT2</i>     | REACTOME_SIGNALLING_TO_ERKS                   |
| 18:40543738  | <i>RIT2</i>     | REACTOME_SIGNALLING_TO_ERKS                   |
| 18:40612823  | <i>RIT2</i>     | REACTOME_SIGNALLING_TO_ERKS                   |
| 18:40649778  | <i>RIT2</i>     | REACTOME_SIGNALLING_TO_ERKS                   |
| 18:40671720  | <i>RIT2</i>     | REACTOME_SIGNALLING_TO_ERKS                   |
| 18:40673380  | <i>RIT2</i>     | REACTOME_SIGNALLING_TO_ERKS                   |
| 18:40409806  | <i>RIT2</i>     | REACTOME_SIGNALLING_TO_P38_VIA_RIT_AND_RIN    |
| 18:40494893  | <i>RIT2</i>     | REACTOME_SIGNALLING_TO_P38_VIA_RIT_AND_RIN    |
| 18:40543738  | <i>RIT2</i>     | REACTOME_SIGNALLING_TO_P38_VIA_RIT_AND_RIN    |
| 18:40612823  | <i>RIT2</i>     | REACTOME_SIGNALLING_TO_P38_VIA_RIT_AND_RIN    |
| 18:40649778  | <i>RIT2</i>     | REACTOME_SIGNALLING_TO_P38_VIA_RIT_AND_RIN    |
| 18:40671720  | <i>RIT2</i>     | REACTOME_SIGNALLING_TO_P38_VIA_RIT_AND_RIN    |
| 18:40673380  | <i>RIT2</i>     | REACTOME_SIGNALLING_TO_P38_VIA_RIT_AND_RIN    |
| 17:42454243  | <i>FAM171A2</i> | REACTOME_SIGNAL_TRANSDUCTION_BY_L1            |
| 1:205884274  | <i>RAB29</i>    | REACTOME_SLC_MEDIATED_TRANSMEMBRANE_TRANSPORT |
| 2:103267601  | <i>MAP4K4</i>   | REACTOME_SLC_MEDIATED_TRANSMEMBRANE_TRANSPORT |
| 2:103282717  | <i>MAP4K4</i>   | REACTOME_SLC_MEDIATED_TRANSMEMBRANE_TRANSPORT |
| 2:103317676  | <i>MAP4K4</i>   | REACTOME_SLC_MEDIATED_TRANSMEMBRANE_TRANSPORT |
| 5:101579003  | <i>PAM</i>      | REACTOME_SLC_MEDIATED_TRANSMEMBRANE_TRANSPORT |
| 6:31846234   | <i>HLA-DRB5</i> | REACTOME_SLC_MEDIATED_TRANSMEMBRANE_TRANSPORT |
| 8:17390689   | <i>FGF20</i>    | REACTOME_SLC_MEDIATED_TRANSMEMBRANE_TRANSPORT |
| 8:17402274   | <i>FGF20</i>    | REACTOME_SLC_MEDIATED_TRANSMEMBRANE_TRANSPORT |
| 8:17427186   | <i>FGF20</i>    | REACTOME_SLC_MEDIATED_TRANSMEMBRANE_TRANSPORT |
| 12:40240262  | <i>LRRK2_2</i>  | REACTOME_SLC_MEDIATED_TRANSMEMBRANE_TRANSPORT |
| 12:40252360  | <i>LRRK2_2</i>  | REACTOME_SLC_MEDIATED_TRANSMEMBRANE_TRANSPORT |
| 12:40267539  | <i>LRRK2_2</i>  | REACTOME_SLC_MEDIATED_TRANSMEMBRANE_TRANSPORT |
| 12:40302599  | <i>LRRK2_2</i>  | REACTOME_SLC_MEDIATED_TRANSMEMBRANE_TRANSPORT |
| 12:40348056  | <i>LRRK2_2</i>  | REACTOME_SLC_MEDIATED_TRANSMEMBRANE_TRANSPORT |
| 12:40349236  | <i>LRRK2_2</i>  | REACTOME_SLC_MEDIATED_TRANSMEMBRANE_TRANSPORT |
| 12:40378773  | <i>LRRK2_2</i>  | REACTOME_SLC_MEDIATED_TRANSMEMBRANE_TRANSPORT |
| 12:40393852  | <i>LRRK2_2</i>  | REACTOME_SLC_MEDIATED_TRANSMEMBRANE_TRANSPORT |
| 12:40405478  | <i>LRRK2_2</i>  | REACTOME_SLC_MEDIATED_TRANSMEMBRANE_TRANSPORT |
| 12:40413305  | <i>LRRK2_2</i>  | REACTOME_SLC_MEDIATED_TRANSMEMBRANE_TRANSPORT |

|              |                 |                                                                      |
|--------------|-----------------|----------------------------------------------------------------------|
| 12:40414626  | <i>LRRK2_2</i>  | REACTOME_SLC_MEDIATED_TRANSMEMBRANE_TRANSPORT                        |
| 12:40437969  | <i>LRRK2_2</i>  | REACTOME_SLC_MEDIATED_TRANSMEMBRANE_TRANSPORT                        |
| 12:46618863  | <i>SCAF11</i>   | REACTOME_SLC_MEDIATED_TRANSMEMBRANE_TRANSPORT                        |
| 12:47192323  | <i>SCAF11</i>   | REACTOME_SLC_MEDIATED_TRANSMEMBRANE_TRANSPORT                        |
| 12:47222402  | <i>SCAF11</i>   | REACTOME_SLC_MEDIATED_TRANSMEMBRANE_TRANSPORT                        |
| 17:6594869   | <i>V1NB1</i>    | REACTOME_SLC_MEDIATED_TRANSMEMBRANE_TRANSPORT                        |
| 17:6612244   | <i>V1NB1</i>    | REACTOME_SLC_MEDIATED_TRANSMEMBRANE_TRANSPORT                        |
| 17:42332803  | <i>FAM171A2</i> | REACTOME_SLC_MEDIATED_TRANSMEMBRANE_TRANSPORT                        |
| 17:42338993  | <i>FAM171A2</i> | REACTOME_SLC_MEDIATED_TRANSMEMBRANE_TRANSPORT                        |
| 17:42332803  | <i>FAM171A2</i> | REACTOME_SLC_TRANSPORTER_DISORDERS                                   |
| 17:42338993  | <i>FAM171A2</i> | REACTOME_SLC_TRANSPORTER_DISORDERS                                   |
| 2:135708115  | <i>TMEM163</i>  | REACTOME_SMAD2_SMAD3:SMAD4_HETEROTRIMER_REGULATES_TRANSCRIPTION      |
| 8:22421355   | <i>BIN3</i>     | REACTOME_SMOOTH_MUSCLE_CONTRACTION                                   |
| 17:6594869   | <i>V1NB1</i>    | REACTOME_SODIUM_COUPLED_SULPHATE_DI_AND_TRI_CARBOXYLATE_TRANSPORTERS |
| 17:6612244   | <i>V1NB1</i>    | REACTOME_SODIUM_COUPLED_SULPHATE_DI_AND_TRI_CARBOXYLATE_TRANSPORTERS |
| 2:103267601  | <i>MAP4K4</i>   | REACTOME_SODIUM_PROTON_EXCHANGERS                                    |
| 2:103282717  | <i>MAP4K4</i>   | REACTOME_SODIUM_PROTON_EXCHANGERS                                    |
| 2:103317676  | <i>MAP4K4</i>   | REACTOME_SODIUM_PROTON_EXCHANGERS                                    |
| 5:134307319  | <i>C5orf24</i>  | REACTOME_SPERM_MOTILITY_AND_TAXES                                    |
| 5:134315853  | <i>C5orf24</i>  | REACTOME_SPERM_MOTILITY_AND_TAXES                                    |
| 1:226497419  | <i>ITPKB</i>    | REACTOME_S_PHASE                                                     |
| 3:48199695   | <i>IP6K2</i>    | REACTOME_S_PHASE                                                     |
| 3:48214438   | <i>IP6K2</i>    | REACTOME_S_PHASE                                                     |
| 12:133206648 | <i>FBRSL1</i>   | REACTOME_S_PHASE                                                     |
| 12:133223685 | <i>FBRSL1</i>   | REACTOME_S_PHASE                                                     |
| 14:74640180  | <i>RPS6KL1</i>  | REACTOME_S_PHASE                                                     |
| 17:45215865  | <i>WNT3</i>     | REACTOME_S_PHASE                                                     |
| 17:45244822  | <i>WNT3</i>     | REACTOME_S_PHASE                                                     |
| 20:5934513   | <i>CRLS1</i>    | REACTOME_S_PHASE                                                     |
| 20:5935522   | <i>CRLS1</i>    | REACTOME_S_PHASE                                                     |
| 20:5968737   | <i>CRLS1</i>    | REACTOME_S_PHASE                                                     |
| 20:5968964   | <i>CRLS1</i>    | REACTOME_S_PHASE                                                     |
| 2:169389091  | <i>STK39</i>    | REACTOME_SPHINGOLIPID_DE_NOVO_BIOSYNTHESIS                           |
| 2:169518974  | <i>STK39</i>    | REACTOME_SPHINGOLIPID_DE_NOVO_BIOSYNTHESIS                           |
| 2:169519063  | <i>STK39</i>    | REACTOME_SPHINGOLIPID_DE_NOVO_BIOSYNTHESIS                           |
| 2:169520026  | <i>STK39</i>    | REACTOME_SPHINGOLIPID_DE_NOVO_BIOSYNTHESIS                           |
| 2:169550660  | <i>STK39</i>    | REACTOME_SPHINGOLIPID_DE_NOVO_BIOSYNTHESIS                           |
| 2:169561027  | <i>STK39</i>    | REACTOME_SPHINGOLIPID_DE_NOVO_BIOSYNTHESIS                           |
| 2:169597744  | <i>STK39</i>    | REACTOME_SPHINGOLIPID_DE_NOVO_BIOSYNTHESIS                           |
| 3:160668220  | <i>SPTSSB</i>   | REACTOME_SPHINGOLIPID_DE_NOVO_BIOSYNTHESIS                           |
| 3:161068566  | <i>SPTSSB</i>   | REACTOME_SPHINGOLIPID_DE_NOVO_BIOSYNTHESIS                           |
| 3:161075189  | <i>SPTSSB</i>   | REACTOME_SPHINGOLIPID_DE_NOVO_BIOSYNTHESIS                           |
| 1:155205634  | <i>GBAP1</i>    | REACTOME_SPHINGOLIPID_METABOLISM                                     |
| 2:169389091  | <i>STK39</i>    | REACTOME_SPHINGOLIPID_METABOLISM                                     |
| 2:169518974  | <i>STK39</i>    | REACTOME_SPHINGOLIPID_METABOLISM                                     |
| 2:169519063  | <i>STK39</i>    | REACTOME_SPHINGOLIPID_METABOLISM                                     |
| 2:169520026  | <i>STK39</i>    | REACTOME_SPHINGOLIPID_METABOLISM                                     |
| 2:169550660  | <i>STK39</i>    | REACTOME_SPHINGOLIPID_METABOLISM                                     |
| 2:169561027  | <i>STK39</i>    | REACTOME_SPHINGOLIPID_METABOLISM                                     |
| 2:169597744  | <i>STK39</i>    | REACTOME_SPHINGOLIPID_METABOLISM                                     |
| 3:160668220  | <i>SPTSSB</i>   | REACTOME_SPHINGOLIPID_METABOLISM                                     |
| 3:160817877  | <i>SPTSSB</i>   | REACTOME_SPHINGOLIPID_METABOLISM                                     |
| 3:161068566  | <i>SPTSSB</i>   | REACTOME_SPHINGOLIPID_METABOLISM                                     |

|             |                 |                                                                 |
|-------------|-----------------|-----------------------------------------------------------------|
| 3:161075189 | <i>SPTSSB</i>   | REACTOME_SPHINGOLIPID_METABOLISM                                |
| 4:114899005 | <i>CAMK2D</i>   | REACTOME_SPHINGOLIPID_METABOLISM                                |
| 14:88372366 | <i>GALC</i>     | REACTOME_SPHINGOLIPID_METABOLISM                                |
| 14:88393900 | <i>GALC</i>     | REACTOME_SPHINGOLIPID_METABOLISM                                |
| 14:88415750 | <i>GALC</i>     | REACTOME_SPHINGOLIPID_METABOLISM                                |
| 14:88443553 | <i>GALC</i>     | REACTOME_SPHINGOLIPID_METABOLISM                                |
| 5:133558885 | <i>C5orf24</i>  | REACTOME_SPRY_REGULATION_OF_FGF_SIGNALING                       |
| 17:7578671  | <i>V1NB1</i>    | REACTOME_STABILIZATION_OF_P53                                   |
| 17:40392358 | <i>RETREG3</i>  | REACTOME_STAT5_ACTIVATION                                       |
| 4:170563153 | <i>CLCN3</i>    | REACTOME_STIMULI_SENSING_CHANNELS                               |
| 4:170569172 | <i>CLCN3</i>    | REACTOME_STIMULI_SENSING_CHANNELS                               |
| 4:170620812 | <i>CLCN3</i>    | REACTOME_STIMULI_SENSING_CHANNELS                               |
| 12:45755099 | <i>SCAF11</i>   | REACTOME_STIMULI_SENSING_CHANNELS                               |
| 17:40938261 | <i>RETREG3</i>  | REACTOME_STIMULI_SENSING_CHANNELS                               |
| 3:18395010  | <i>SATB1</i>    | REACTOME_SUMOYLATION_OF_CHROMATIN_ORGANIZATION_PROTEINS         |
| 3:18472577  | <i>SATB1</i>    | REACTOME_SUMOYLATION_OF_CHROMATIN_ORGANIZATION_PROTEINS         |
| 1:226568665 | <i>ITPKB</i>    | REACTOME_SUMOYLATION_OF_DNA_DAMAGE_RESPONSE_AND_REPAIR_PROTEINS |
| 2:17941653  | <i>KCNS3</i>    | REACTOME_SUMOYLATION_OF_DNA_DAMAGE_RESPONSE_AND_REPAIR_PROTEINS |
| 2:17963171  | <i>KCNS3</i>    | REACTOME_SUMOYLATION_OF_DNA_DAMAGE_RESPONSE_AND_REPAIR_PROTEINS |
| 15:61016235 | <i>VPS13C</i>   | REACTOME_SUMOYLATION_OF_INTRACELLULAR_RECEPTORS                 |
| 15:61065568 | <i>VPS13C</i>   | REACTOME_SUMOYLATION_OF_INTRACELLULAR_RECEPTORS                 |
| 15:61094298 | <i>VPS13C</i>   | REACTOME_SUMOYLATION_OF_INTRACELLULAR_RECEPTORS                 |
| 15:61140736 | <i>VPS13C</i>   | REACTOME_SUMOYLATION_OF_INTRACELLULAR_RECEPTORS                 |
| 15:61142062 | <i>VPS13C</i>   | REACTOME_SUMOYLATION_OF_INTRACELLULAR_RECEPTORS                 |
| 15:61162571 | <i>VPS13C</i>   | REACTOME_SUMOYLATION_OF_INTRACELLULAR_RECEPTORS                 |
| 15:61191617 | <i>VPS13C</i>   | REACTOME_SUMOYLATION_OF_INTRACELLULAR_RECEPTORS                 |
| 15:61195427 | <i>VPS13C</i>   | REACTOME_SUMOYLATION_OF_INTRACELLULAR_RECEPTORS                 |
| 15:61221682 | <i>VPS13C</i>   | REACTOME_SUMOYLATION_OF_INTRACELLULAR_RECEPTORS                 |
| 15:61298486 | <i>VPS13C</i>   | REACTOME_SUMOYLATION_OF_INTRACELLULAR_RECEPTORS                 |
| 15:61375480 | <i>VPS13C</i>   | REACTOME_SUMOYLATION_OF_INTRACELLULAR_RECEPTORS                 |
| 15:61434581 | <i>VPS13C</i>   | REACTOME_SUMOYLATION_OF_INTRACELLULAR_RECEPTORS                 |
| 15:61467078 | <i>VPS13C</i>   | REACTOME_SUMOYLATION_OF_INTRACELLULAR_RECEPTORS                 |
| 15:61470808 | <i>VPS13C</i>   | REACTOME_SUMOYLATION_OF_INTRACELLULAR_RECEPTORS                 |
| 15:61500263 | <i>VPS13C</i>   | REACTOME_SUMOYLATION_OF_INTRACELLULAR_RECEPTORS                 |
| 6:33287183  | <i>HLA-DRB5</i> | REACTOME_SUMOYLATION_OF_TRANSCRIPTION_COFACTORS                 |
| 17:7578671  | <i>V1NB1</i>    | REACTOME_SUMOYLATION_OF_TRANSCRIPTION_FACTORS                   |
| 1:226568665 | <i>ITPKB</i>    | REACTOME_SUMOYLATION                                            |
| 2:17941653  | <i>KCNS3</i>    | REACTOME_SUMOYLATION                                            |
| 2:17963171  | <i>KCNS3</i>    | REACTOME_SUMOYLATION                                            |
| 3:18395010  | <i>SATB1</i>    | REACTOME_SUMOYLATION                                            |
| 3:18472577  | <i>SATB1</i>    | REACTOME_SUMOYLATION                                            |
| 6:33287183  | <i>HLA-DRB5</i> | REACTOME_SUMOYLATION                                            |
| 15:61016235 | <i>VPS13C</i>   | REACTOME_SUMOYLATION                                            |
| 15:61065568 | <i>VPS13C</i>   | REACTOME_SUMOYLATION                                            |
| 15:61094298 | <i>VPS13C</i>   | REACTOME_SUMOYLATION                                            |
| 15:61140736 | <i>VPS13C</i>   | REACTOME_SUMOYLATION                                            |
| 15:61142062 | <i>VPS13C</i>   | REACTOME_SUMOYLATION                                            |
| 15:61162571 | <i>VPS13C</i>   | REACTOME_SUMOYLATION                                            |
| 15:61191617 | <i>VPS13C</i>   | REACTOME_SUMOYLATION                                            |
| 15:61195427 | <i>VPS13C</i>   | REACTOME_SUMOYLATION                                            |
| 15:61221682 | <i>VPS13C</i>   | REACTOME_SUMOYLATION                                            |
| 15:61298486 | <i>VPS13C</i>   | REACTOME_SUMOYLATION                                            |
| 15:61375480 | <i>VPS13C</i>   | REACTOME_SUMOYLATION                                            |

|              |              |                                                                               |
|--------------|--------------|-------------------------------------------------------------------------------|
| 15:61434581  | VPS13C       | REACTOME_SUMOYLATION                                                          |
| 15:61467078  | VPS13C       | REACTOME_SUMOYLATION                                                          |
| 15:61470808  | VPS13C       | REACTOME_SUMOYLATION                                                          |
| 15:61500263  | VPS13C       | REACTOME_SUMOYLATION                                                          |
| 17:7578671   | V1NB1        | REACTOME_SUMOYLATION                                                          |
| 8:17014585   | FGF20        | REACTOME_SURFACTANT_METABOLISM                                                |
| 8:17030852   | FGF20        | REACTOME_SURFACTANT_METABOLISM                                                |
| 8:17053322   | FGF20        | REACTOME_SURFACTANT_METABOLISM                                                |
| 17:45215865  | WNT3         | REACTOME_SWITCHING_OF_ORIGINS_TO_A_POST_REPLICATIVE_STATE                     |
| 17:45244822  | WNT3         | REACTOME_SWITCHING_OF_ORIGINS_TO_A_POST_REPLICATIVE_STATE                     |
| 20:5934513   | CRLS1        | REACTOME_SWITCHING_OF_ORIGINS_TO_A_POST_REPLICATIVE_STATE                     |
| 20:5935522   | CRLS1        | REACTOME_SWITCHING_OF_ORIGINS_TO_A_POST_REPLICATIVE_STATE                     |
| 20:5968737   | CRLS1        | REACTOME_SWITCHING_OF_ORIGINS_TO_A_POST_REPLICATIVE_STATE                     |
| 20:5968964   | CRLS1        | REACTOME_SWITCHING_OF_ORIGINS_TO_A_POST_REPLICATIVE_STATE                     |
| 17:7101771   | V1NB1        | REACTOME_SYNAPTIC_ADHESION_LIKE_MOLECULES                                     |
| 17:7983799   | V1NB1        | REACTOME_SYNTHESIS_OF_12_EICOSATETRAENOIC_ACID_DERIVATIVES                    |
| 17:8019125   | V1NB1        | REACTOME_SYNTHESIS_OF_12_EICOSATETRAENOIC_ACID_DERIVATIVES                    |
| 5:133710339  | C5orf24      | REACTOME_SYNTHESIS_OF_ACTIVE_UBIQUITIN: ROLES_OF_E1_AND_E2_ENZYMES            |
| 9:33845203   | UBAP2        | REACTOME_SYNTHESIS_OF_ACTIVE_UBIQUITIN: ROLES_OF_E1_AND_E2_ENZYMES            |
| 16:30999462  | SETD1A       | REACTOME_SYNTHESIS_OF_BILE_ACIDS_AND_BILE_SALTS                               |
| 16:30999462  | SETD1A       | REACTOME_SYNTHESIS_OF_BILE_ACIDS_AND_BILE_SALTS_VIA_24_HYDROXYCHOLESTEROL     |
| 16:30999462  | SETD1A       | REACTOME_SYNTHESIS_OF_BILE_ACIDS_AND_BILE_SALTS_VIA_27_HYDROXYCHOLESTEROL     |
| 16:30999462  | SETD1A       | REACTOME_SYNTHESIS_OF_BILE_ACIDS_AND_BILE_SALTS_VIA_7ALPHA_HYDROXYCHOLESTEROL |
| 1:172386261  | VAMP4        | REACTOME_SYNTHESIS_OF_GLYCOSYLPHOSPHATIDYLINOSITOL_GPI                        |
| 1:172388441  | VAMP4        | REACTOME_SYNTHESIS_OF_GLYCOSYLPHOSPHATIDYLINOSITOL_GPI                        |
| 1:172389198  | VAMP4        | REACTOME_SYNTHESIS_OF_GLYCOSYLPHOSPHATIDYLINOSITOL_GPI                        |
| 8:17161374   | FGF20        | REACTOME_SYNTHESIS_OF_IP2_IP_AND_INS_IN_THE_CYTOSOL                           |
| 8:17176046   | FGF20        | REACTOME_SYNTHESIS_OF_IP2_IP_AND_INS_IN_THE_CYTOSOL                           |
| 8:17243260   | FGF20        | REACTOME_SYNTHESIS_OF_IP2_IP_AND_INS_IN_THE_CYTOSOL                           |
| 8:17260937   | FGF20        | REACTOME_SYNTHESIS_OF_IP2_IP_AND_INS_IN_THE_CYTOSOL                           |
| 1:226907849  | ITPKB        | REACTOME_SYNTHESIS_OF_IP3_AND_IP4_IN_THE_CYTOSOL                              |
| 1:226910340  | ITPKB        | REACTOME_SYNTHESIS_OF_IP3_AND_IP4_IN_THE_CYTOSOL                              |
| 1:226916078  | ITPKB        | REACTOME_SYNTHESIS_OF_IP3_AND_IP4_IN_THE_CYTOSOL                              |
| 17:43195981  | CRHR1_2      | REACTOME_SYNTHESIS_OF_IP3_AND_IP4_IN_THE_CYTOSOL                              |
| 2:96858914   | KCNIP3       | REACTOME_SYNTHESIS_OF_PC                                                      |
| 6:31846234   | HLA-DRB5     | REACTOME_SYNTHESIS_OF_PC                                                      |
| 10:121505277 | INPP5F       | REACTOME_SYNTHESIS_OF_PIPS_AT_THE_EARLY_ENDOSOME_MEMBRANE                     |
| 10:121538407 | INPP5F       | REACTOME_SYNTHESIS_OF_PIPS_AT_THE_EARLY_ENDOSOME_MEMBRANE                     |
| 10:121560563 | INPP5F       | REACTOME_SYNTHESIS_OF_PIPS_AT_THE_EARLY_ENDOSOME_MEMBRANE                     |
| 8:17161374   | FGF20        | REACTOME_SYNTHESIS_OF_PIPS_AT_THE_LATE_ENDOSOME_MEMBRANE                      |
| 8:17176046   | FGF20        | REACTOME_SYNTHESIS_OF_PIPS_AT_THE_LATE_ENDOSOME_MEMBRANE                      |
| 8:17243260   | FGF20        | REACTOME_SYNTHESIS_OF_PIPS_AT_THE_LATE_ENDOSOME_MEMBRANE                      |
| 8:17260937   | FGF20        | REACTOME_SYNTHESIS_OF_PIPS_AT_THE_LATE_ENDOSOME_MEMBRANE                      |
| 12:123561638 | HIP1R        | REACTOME_SYNTHESIS_OF_PI                                                      |
| 12:123585705 | HIP1R        | REACTOME_SYNTHESIS_OF_PI                                                      |
| 16:29871730  | CD19         | REACTOME_SYNTHESIS_OF_PI                                                      |
| 17:6370241   | V1NB1        | REACTOME_SYNTHESIS_OF_PI                                                      |
| 17:6406333   | V1NB1        | REACTOME_SYNTHESIS_OF_PI                                                      |
| 5:60053220   | ELOVL7       | REACTOME_SYNTHESIS_OF_VERY_LONG_CHAIN_FATTY_ACYL_COAS                         |
| 5:60085489   | ELOVL7       | REACTOME_SYNTHESIS_OF_VERY_LONG_CHAIN_FATTY_ACYL_COAS                         |
| 5:60093890   | ELOVL7       | REACTOME_SYNTHESIS_OF_VERY_LONG_CHAIN_FATTY_ACYL_COAS                         |
| 7:66487445   | GS1-124K5.11 | REACTOME_SYNTHESIS_OF_WYBUTOSINE_AT_G37_OF_TRNA_PHE                           |
| 7:66543959   | GS1-124K5.11 | REACTOME_SYNTHESIS_OF_WYBUTOSINE_AT_G37_OF_TRNA_PHE                           |

|              |                     |                                                                                                   |
|--------------|---------------------|---------------------------------------------------------------------------------------------------|
| 7:66638082   | <i>GS1-124K5.11</i> | REACTOME_SYNTHESIS_OF_WYBUTOSINE_AT_G37_OF_TRNA_PHE                                               |
| 8:11558567   | <i>CTSB</i>         | REACTOME_SYNTHESIS_SECRETION_AND_INACTIVATION_OF_GLUCOSE_DEPENDENT_INSULINOTROPIC_POLYPEPTIDE_GIP |
| 8:11599269   | <i>CTSB</i>         | REACTOME_SYNTHESIS_SECRETION_AND_INACTIVATION_OF_GLUCOSE_DEPENDENT_INSULINOTROPIC_POLYPEPTIDE_GIP |
| 6:32151443   | <i>HLA-DRB5</i>     | REACTOME_TAK1_ACTIVATES_NFKB_BY_PHOSPHORYLATION_AND_ACTIVATION_OF_IKKS_COMPLEX                    |
| 16:50730088  | <i>CASC16</i>       | REACTOME_TAK1_ACTIVATES_NFKB_BY_PHOSPHORYLATION_AND_ACTIVATION_OF_IKKS_COMPLEX                    |
| 16:50730446  | <i>CASC16</i>       | REACTOME_TAK1_ACTIVATES_NFKB_BY_PHOSPHORYLATION_AND_ACTIVATION_OF_IKKS_COMPLEX                    |
| 16:50745926  | <i>CASC16</i>       | REACTOME_TAK1_ACTIVATES_NFKB_BY_PHOSPHORYLATION_AND_ACTIVATION_OF_IKKS_COMPLEX                    |
| 14:88681675  | <i>GALC</i>         | REACTOME_TANDEM_PORE_DOMAIN_POTASSIUM_CHANNELS                                                    |
| 14:88709038  | <i>GALC</i>         | REACTOME_TANDEM_PORE_DOMAIN_POTASSIUM_CHANNELS                                                    |
| 14:88738350  | <i>GALC</i>         | REACTOME_TANDEM_PORE_DOMAIN_POTASSIUM_CHANNELS                                                    |
| 14:88769689  | <i>GALC</i>         | REACTOME_TANDEM_PORE_DOMAIN_POTASSIUM_CHANNELS                                                    |
| 14:88778263  | <i>GALC</i>         | REACTOME_TANDEM_PORE_DOMAIN_POTASSIUM_CHANNELS                                                    |
| 5:133558885  | <i>C5orf24</i>      | REACTOME_TCF_DEPENDENT_SIGNALING_IN_RESPONSE_TO_WNT                                               |
| 10:103185542 | <i>GBF1</i>         | REACTOME_TCF_DEPENDENT_SIGNALING_IN_RESPONSE_TO_WNT                                               |
| 10:103305087 | <i>GBF1</i>         | REACTOME_TCF_DEPENDENT_SIGNALING_IN_RESPONSE_TO_WNT                                               |
| 10:103308244 | <i>GBF1</i>         | REACTOME_TCF_DEPENDENT_SIGNALING_IN_RESPONSE_TO_WNT                                               |
| 17:7129974   | <i>V1NB1</i>        | REACTOME_TCF_DEPENDENT_SIGNALING_IN_RESPONSE_TO_WNT                                               |
| 17:44843651  | <i>WNT3</i>         | REACTOME_TCF_DEPENDENT_SIGNALING_IN_RESPONSE_TO_WNT                                               |
| 17:44870978  | <i>WNT3</i>         | REACTOME_TCF_DEPENDENT_SIGNALING_IN_RESPONSE_TO_WNT                                               |
| 17:44871422  | <i>WNT3</i>         | REACTOME_TCF_DEPENDENT_SIGNALING_IN_RESPONSE_TO_WNT                                               |
| 17:44888209  | <i>WNT3</i>         | REACTOME_TCF_DEPENDENT_SIGNALING_IN_RESPONSE_TO_WNT                                               |
| 17:44888715  | <i>WNT3</i>         | REACTOME_TCF_DEPENDENT_SIGNALING_IN_RESPONSE_TO_WNT                                               |
| 17:44906949  | <i>WNT3</i>         | REACTOME_TCF_DEPENDENT_SIGNALING_IN_RESPONSE_TO_WNT                                               |
| 19:3008151   | <i>SPPL2B</i>       | REACTOME_TCF_DEPENDENT_SIGNALING_IN_RESPONSE_TO_WNT                                               |
| 19:3024077   | <i>SPPL2B</i>       | REACTOME_TCF_DEPENDENT_SIGNALING_IN_RESPONSE_TO_WNT                                               |
| 6:32602372   | <i>HLA-DRB5</i>     | REACTOME_TCR_SIGNALING                                                                            |
| 10:103185542 | <i>GBF1</i>         | REACTOME_TCR_SIGNALING                                                                            |
| 10:103305087 | <i>GBF1</i>         | REACTOME_TCR_SIGNALING                                                                            |
| 10:103308244 | <i>GBF1</i>         | REACTOME_TCR_SIGNALING                                                                            |
| 12:133206648 | <i>FBRSL1</i>       | REACTOME_TELOMERE_C_STRAND_LAGGING_STRAND_SYNTHESIS                                               |
| 12:133223685 | <i>FBRSL1</i>       | REACTOME_TELOMERE_C_STRAND_LAGGING_STRAND_SYNTHESIS                                               |
| 12:133206648 | <i>FBRSL1</i>       | REACTOME_TELOMERE_MAINTENANCE                                                                     |
| 12:133223685 | <i>FBRSL1</i>       | REACTOME_TELOMERE_MAINTENANCE                                                                     |
| 12:133206648 | <i>FBRSL1</i>       | REACTOME_TERMINATION_OF_TRANSLESION_DNA_SYNTHESIS                                                 |
| 12:133223685 | <i>FBRSL1</i>       | REACTOME_TERMINATION_OF_TRANSLESION_DNA_SYNTHESIS                                                 |
| 14:55348869  | <i>GCH1</i>         | REACTOME_TETRAHYDROBIOPTERIN_BH4_SYNTHESIS_RECYCLING_SALVAGE_AND_REGULATION                       |
| 3:49406095   | <i>IP6K2</i>        | REACTOME_TGF_BETA_RECEPTOR_SIGNALING_IN_EMT_EPITHELIAL_TO_MESENCHYMAL_TRANSITION                  |
| 3:49424231   | <i>IP6K2</i>        | REACTOME_TGF_BETA_RECEPTOR_SIGNALING_IN_EMT_EPITHELIAL_TO_MESENCHYMAL_TRANSITION                  |
| 3:49450137   | <i>IP6K2</i>        | REACTOME_TGF_BETA_RECEPTOR_SIGNALING_IN_EMT_EPITHELIAL_TO_MESENCHYMAL_TRANSITION                  |
| 4:114899005  | <i>CAMK2D</i>       | REACTOME_THE_ACTIVATION_OF_ARYLSULFATASES                                                         |
| 1:161171736  | <i>FCGR2A</i>       | REACTOME_THE_CITRIC_ACID_TCA_CYCLE_AND_RESPIRATORY_ELECTRON_TRANSPORT                             |
| 5:60273923   | <i>ELOVL7</i>       | REACTOME_THE_CITRIC_ACID_TCA_CYCLE_AND_RESPIRATORY_ELECTRON_TRANSPORT                             |
| 5:60288288   | <i>ELOVL7</i>       | REACTOME_THE_CITRIC_ACID_TCA_CYCLE_AND_RESPIRATORY_ELECTRON_TRANSPORT                             |
| 10:15199347  | <i>ITGA8</i>        | REACTOME_THE_PHOTOTRANSDUCTION_CASCADE                                                            |
| 17:43181287  | <i>CRHR1_2</i>      | REACTOME_THE_PHOTOTRANSDUCTION_CASCADE                                                            |
| 17:43184627  | <i>CRHR1_2</i>      | REACTOME_THE_PHOTOTRANSDUCTION_CASCADE                                                            |
| 17:7578671   | <i>V1NB1</i>        | REACTOME_THE_ROLE_OF_GTSE1_IN_G2_M_PROGRESSION_AFTER_G2_CHECKPOINT                                |
| 6:112137847  | <i>FYN</i>          | REACTOME_THE_ROLE_OF_NEF_IN_HIV_1_REPLICATION_AND_DISEASE_PATHOGENESIS                            |
| 6:112151452  | <i>FYN</i>          | REACTOME_THE_ROLE_OF_NEF_IN_HIV_1_REPLICATION_AND_DISEASE_PATHOGENESIS                            |
| 6:112175069  | <i>FYN</i>          | REACTOME_THE_ROLE_OF_NEF_IN_HIV_1_REPLICATION_AND_DISEASE_PATHOGENESIS                            |
| 19:2557113   | <i>SPPL2B</i>       | REACTOME_THROMBIN_SIGNALLING_THROUGH_PROTEINASE_ACTIVATED_RECEPTORS_PARS                          |
| 19:2563327   | <i>SPPL2B</i>       | REACTOME_THROMBIN_SIGNALLING_THROUGH_PROTEINASE_ACTIVATED_RECEPTORS_PARS                          |
| 19:2580057   | <i>SPPL2B</i>       | REACTOME_THROMBIN_SIGNALLING_THROUGH_PROTEINASE_ACTIVATED_RECEPTORS_PARS                          |

|              |                 |                                                                                       |
|--------------|-----------------|---------------------------------------------------------------------------------------|
| 19:2660983   | <i>SPPL2B</i>   | REACTOME_THROMBIN_SIGNALLING_THROUGH_PROTEINASE_ACTIVATED_RECEPTORS_PARS              |
| 19:3142784   | <i>SPPL2B</i>   | REACTOME_THROMBIN_SIGNALLING_THROUGH_PROTEINASE_ACTIVATED_RECEPTORS_PARS              |
| 19:3147326   | <i>SPPL2B</i>   | REACTOME_THROMBIN_SIGNALLING_THROUGH_PROTEINASE_ACTIVATED_RECEPTORS_PARS              |
| 19:2557113   | <i>SPPL2B</i>   | REACTOME_THROMBOXANE_SIGNALLING_THROUGH_TP_RECEPTOR                                   |
| 19:2563327   | <i>SPPL2B</i>   | REACTOME_THROMBOXANE_SIGNALLING_THROUGH_TP_RECEPTOR                                   |
| 19:2580057   | <i>SPPL2B</i>   | REACTOME_THROMBOXANE_SIGNALLING_THROUGH_TP_RECEPTOR                                   |
| 19:2660983   | <i>SPPL2B</i>   | REACTOME_THROMBOXANE_SIGNALLING_THROUGH_TP_RECEPTOR                                   |
| 19:3142784   | <i>SPPL2B</i>   | REACTOME_THROMBOXANE_SIGNALLING_THROUGH_TP_RECEPTOR                                   |
| 19:3147326   | <i>SPPL2B</i>   | REACTOME_THROMBOXANE_SIGNALLING_THROUGH_TP_RECEPTOR                                   |
| 21:37854286  | <i>DYRK1A</i>   | REACTOME_TIGHT_JUNCTION_INTERACTIONS                                                  |
| 21:37859449  | <i>DYRK1A</i>   | REACTOME_TIGHT_JUNCTION_INTERACTIONS                                                  |
| 21:37860785  | <i>DYRK1A</i>   | REACTOME_TIGHT_JUNCTION_INTERACTIONS                                                  |
| 21:37894089  | <i>DYRK1A</i>   | REACTOME_TIGHT_JUNCTION_INTERACTIONS                                                  |
| 21:37899076  | <i>DYRK1A</i>   | REACTOME_TIGHT_JUNCTION_INTERACTIONS                                                  |
| 16:50790891  | <i>CASC16</i>   | REACTOME_TNFR1_INDUCED_NFKAPPAB_SIGNALING_PATHWAY                                     |
| 16:50790891  | <i>CASC16</i>   | REACTOME_TNFR1_INDUCED_PROAPOPTOTIC_SIGNALING                                         |
| 10:103185542 | <i>GBF1</i>     | REACTOME_TNFR2_NON_CANONICAL_NF_KB_PATHWAY                                            |
| 10:103305087 | <i>GBF1</i>     | REACTOME_TNFR2_NON_CANONICAL_NF_KB_PATHWAY                                            |
| 10:103308244 | <i>GBF1</i>     | REACTOME_TNFR2_NON_CANONICAL_NF_KB_PATHWAY                                            |
| 17:7455536   | <i>V1NB1</i>    | REACTOME_TNFR2_NON_CANONICAL_NF_KB_PATHWAY                                            |
| 17:43390763  | <i>CRHR1_2</i>  | REACTOME_TNFR2_NON_CANONICAL_NF_KB_PATHWAY                                            |
| 17:7455536   | <i>V1NB1</i>    | REACTOME_TNF_RECEPTOR_SUPERFAMILY_TNFSF_MEMBERS_MEDIATING_NON_CANONICAL_NF_KB_PATHWAY |
| 17:43390763  | <i>CRHR1_2</i>  | REACTOME_TNF_RECEPTOR_SUPERFAMILY_TNFSF_MEMBERS_MEDIATING_NON_CANONICAL_NF_KB_PATHWAY |
| 16:50790891  | <i>CASC16</i>   | REACTOME_TNF_SIGNALING                                                                |
| 19:2335872   | <i>SPPL2B</i>   | REACTOME_TNF_SIGNALING                                                                |
| 19:2346990   | <i>SPPL2B</i>   | REACTOME_TNF_SIGNALING                                                                |
| 19:2352757   | <i>SPPL2B</i>   | REACTOME_TNF_SIGNALING                                                                |
| 1:171837985  | <i>VAMP4</i>    | REACTOME_TOLL_LIKE_RECEPTOR_4_TLR4_CASCADE                                            |
| 1:171945488  | <i>VAMP4</i>    | REACTOME_TOLL_LIKE_RECEPTOR_4_TLR4_CASCADE                                            |
| 1:172137119  | <i>VAMP4</i>    | REACTOME_TOLL_LIKE_RECEPTOR_4_TLR4_CASCADE                                            |
| 1:172386261  | <i>VAMP4</i>    | REACTOME_TOLL_LIKE_RECEPTOR_4_TLR4_CASCADE                                            |
| 5:133558885  | <i>C5orf24</i>  | REACTOME_TOLL_LIKE_RECEPTOR_4_TLR4_CASCADE                                            |
| 6:32151443   | <i>HLA-DRB5</i> | REACTOME_TOLL_LIKE_RECEPTOR_4_TLR4_CASCADE                                            |
| 10:103185542 | <i>GBF1</i>     | REACTOME_TOLL_LIKE_RECEPTOR_4_TLR4_CASCADE                                            |
| 10:103305087 | <i>GBF1</i>     | REACTOME_TOLL_LIKE_RECEPTOR_4_TLR4_CASCADE                                            |
| 10:103308244 | <i>GBF1</i>     | REACTOME_TOLL_LIKE_RECEPTOR_4_TLR4_CASCADE                                            |
| 16:50730088  | <i>CASC16</i>   | REACTOME_TOLL_LIKE_RECEPTOR_4_TLR4_CASCADE                                            |
| 16:50730446  | <i>CASC16</i>   | REACTOME_TOLL_LIKE_RECEPTOR_4_TLR4_CASCADE                                            |
| 16:50745926  | <i>CASC16</i>   | REACTOME_TOLL_LIKE_RECEPTOR_4_TLR4_CASCADE                                            |
| 17:41845031  | <i>FAM171A2</i> | REACTOME_TOLL_LIKE_RECEPTOR_4_TLR4_CASCADE                                            |
| 5:133558885  | <i>C5orf24</i>  | REACTOME_TOLL_LIKE_RECEPTOR_9_TLR9_CASCADE                                            |
| 6:32151443   | <i>HLA-DRB5</i> | REACTOME_TOLL_LIKE_RECEPTOR_9_TLR9_CASCADE                                            |
| 10:103185542 | <i>GBF1</i>     | REACTOME_TOLL_LIKE_RECEPTOR_9_TLR9_CASCADE                                            |
| 10:103305087 | <i>GBF1</i>     | REACTOME_TOLL_LIKE_RECEPTOR_9_TLR9_CASCADE                                            |
| 10:103308244 | <i>GBF1</i>     | REACTOME_TOLL_LIKE_RECEPTOR_9_TLR9_CASCADE                                            |
| 16:50730088  | <i>CASC16</i>   | REACTOME_TOLL_LIKE_RECEPTOR_9_TLR9_CASCADE                                            |
| 16:50730446  | <i>CASC16</i>   | REACTOME_TOLL_LIKE_RECEPTOR_9_TLR9_CASCADE                                            |
| 16:50745926  | <i>CASC16</i>   | REACTOME_TOLL_LIKE_RECEPTOR_9_TLR9_CASCADE                                            |
| 17:41845031  | <i>FAM171A2</i> | REACTOME_TOLL_LIKE_RECEPTOR_9_TLR9_CASCADE                                            |
| 1:171837985  | <i>VAMP4</i>    | REACTOME_TOLL_LIKE_RECEPTOR_CASCADES                                                  |
| 1:171945488  | <i>VAMP4</i>    | REACTOME_TOLL_LIKE_RECEPTOR_CASCADES                                                  |
| 1:172137119  | <i>VAMP4</i>    | REACTOME_TOLL_LIKE_RECEPTOR_CASCADES                                                  |
| 1:172386261  | <i>VAMP4</i>    | REACTOME_TOLL_LIKE_RECEPTOR_CASCADES                                                  |

|              |                 |                                                                                                      |
|--------------|-----------------|------------------------------------------------------------------------------------------------------|
| 5:133558885  | <i>C5orf24</i>  | REACTOME_TOLL LIKE RECEPTOR_CASCADES                                                                 |
| 6:32151443   | <i>HLA-DRB5</i> | REACTOME_TOLL LIKE RECEPTOR_CASCADES                                                                 |
| 8:11712443   | <i>CTSB</i>     | REACTOME_TOLL LIKE RECEPTOR_CASCADES                                                                 |
| 10:103185542 | <i>GBF1</i>     | REACTOME_TOLL LIKE RECEPTOR_CASCADES                                                                 |
| 10:103305087 | <i>GBF1</i>     | REACTOME_TOLL LIKE RECEPTOR_CASCADES                                                                 |
| 10:103308244 | <i>GBF1</i>     | REACTOME_TOLL LIKE RECEPTOR_CASCADES                                                                 |
| 16:50730088  | <i>CASC16</i>   | REACTOME_TOLL LIKE RECEPTOR_CASCADES                                                                 |
| 16:50730446  | <i>CASC16</i>   | REACTOME_TOLL LIKE RECEPTOR_CASCADES                                                                 |
| 16:50745926  | <i>CASC16</i>   | REACTOME_TOLL LIKE RECEPTOR_CASCADES                                                                 |
| 17:41845031  | <i>FAM171A2</i> | REACTOME_TOLL LIKE RECEPTOR_CASCADES                                                                 |
| 5:133558885  | <i>C5orf24</i>  | REACTOME_TOLL LIKE RECEPTOR_TLR1:TLR2_CASCADE                                                        |
| 6:32151443   | <i>HLA-DRB5</i> | REACTOME_TOLL LIKE RECEPTOR_TLR1:TLR2_CASCADE                                                        |
| 10:103185542 | <i>GBF1</i>     | REACTOME_TOLL LIKE RECEPTOR_TLR1:TLR2_CASCADE                                                        |
| 10:103305087 | <i>GBF1</i>     | REACTOME_TOLL LIKE RECEPTOR_TLR1:TLR2_CASCADE                                                        |
| 10:103308244 | <i>GBF1</i>     | REACTOME_TOLL LIKE RECEPTOR_TLR1:TLR2_CASCADE                                                        |
| 16:50730088  | <i>CASC16</i>   | REACTOME_TOLL LIKE RECEPTOR_TLR1:TLR2_CASCADE                                                        |
| 16:50730446  | <i>CASC16</i>   | REACTOME_TOLL LIKE RECEPTOR_TLR1:TLR2_CASCADE                                                        |
| 16:50745926  | <i>CASC16</i>   | REACTOME_TOLL LIKE RECEPTOR_TLR1:TLR2_CASCADE                                                        |
| 17:41845031  | <i>FAM171A2</i> | REACTOME_TOLL LIKE RECEPTOR_TLR1:TLR2_CASCADE                                                        |
| 17:7578671   | <i>V1NB1</i>    | REACTOME_TP53_REGULATES_METABOLIC_GENES                                                              |
| 17:7578671   | <i>V1NB1</i>    | P53_REGULATES_TRANSCRIPTION_OF_ADDITIONAL_CELL_CYCLE_GENES_WHOSE_EXACT_ROLE_IN_THE_P53_PATHWAY_REM   |
| 17:7578671   | <i>V1NB1</i>    | REACTOME_TP53_REGULATES_TRANSCRIPTION_OF_CASPASE_ACTIVATORS_AND_CASPASES                             |
| 17:7578671   | <i>V1NB1</i>    | REACTOME_TP53_REGULATES_TRANSCRIPTION_OF_CELL_CYCLE_GENES                                            |
| 8:22974278   | <i>BIN3</i>     | REACTOME_TP53_REGULATES_TRANSCRIPTION_OF_CELL_DEATH_GENES                                            |
| 8:23050400   | <i>BIN3</i>     | REACTOME_TP53_REGULATES_TRANSCRIPTION_OF_CELL_DEATH_GENES                                            |
| 17:7578671   | <i>V1NB1</i>    | REACTOME_TP53_REGULATES_TRANSCRIPTION_OF_CELL_DEATH_GENES                                            |
| 8:22974278   | <i>BIN3</i>     | REACTOME_TP53_REGULATES_TRANSCRIPTION_OF_DEATH_RECEPTORS_AND_LIGANDS                                 |
| 8:23050400   | <i>BIN3</i>     | REACTOME_TP53_REGULATES_TRANSCRIPTION_OF_DEATH_RECEPTORS_AND_LIGANDS                                 |
| 17:7578671   | <i>V1NB1</i>    | REACTOME_TP53_REGULATES_TRANSCRIPTION_OF_DEATH_RECEPTORS_AND_LIGANDS                                 |
| 2:135708115  | <i>TMEM163</i>  | REACTOME_TP53_REGULATES_TRANSCRIPTION_OF_DNA_REPAIR_GENES                                            |
| 6:31925679   | <i>HLA-DRB5</i> | REACTOME_TP53_REGULATES_TRANSCRIPTION_OF_DNA_REPAIR_GENES                                            |
| 17:7578671   | <i>V1NB1</i>    | REACTOME_TP53_REGULATES_TRANSCRIPTION_OF_DNA_REPAIR_GENES                                            |
| 17:7578671   | <i>V1NB1</i>    | REACTOME_TP53_REGULATES_TRANSCRIPTION_OF_GENES_INVOLVED_IN_CYTOCHROME_C_RELEASE                      |
| 17:7578671   | <i>V1NB1</i>    | REACTOME_TP53_REGULATES_TRANSCRIPTION_OF_GENES_INVOLVED_IN_G1_CELL_CYCLE_ARREST                      |
| 17:7578671   | <i>V1NB1</i>    | REACTOME_TP53_REGULATES_TRANSCRIPTION_OF_GENES_INVOLVED_IN_G2_CELL_CYCLE_ARREST                      |
| 17:7578671   | <i>V1NB1</i>    | ATES_TRANSCRIPTION_OF_SEVERAL_ADDITIONAL_CELL_DEATH_GENES_WHOSE_SPECIFIC_ROLES_IN_P53_DEPENDENT_APOP |
| 6:32151443   | <i>HLA-DRB5</i> | REACTOME_TRAF6_MEDIATED_NF_KB_ACTIVATION                                                             |
| 8:11712443   | <i>CTSB</i>     | REACTOME_TRAFFICKING_AND_PROCESSING_OF_ENDOSOMAL_TLR                                                 |
| 17:44800946  | <i>WNT3</i>     | REACTOME_TRAFFICKING_OF_GLR2_CONTAINING_AMPA_RECEPTORS                                               |
| 17:44833217  | <i>WNT3</i>     | REACTOME_TRAFFICKING_OF_GLR2_CONTAINING_AMPA_RECEPTORS                                               |
| 10:104443875 | <i>GBF1</i>     | REACTOME_TRAFFICKING_OF_MYRISTOYLATED_PROTEINS_TO_THE_CILIUM                                         |
| 10:104452818 | <i>GBF1</i>     | REACTOME_TRAFFICKING_OF_MYRISTOYLATED_PROTEINS_TO_THE_CILIUM                                         |
| 8:23050400   | <i>BIN3</i>     | REACTOME_TRAIL_SIGNALING                                                                             |
| 1:226568665  | <i>ITPKB</i>    | REACTOME_TRANSCRIPTIONAL_ACTIVITY_OF_SMAD2_SMAD3:SMAD4_HETEROTRIMER                                  |
| 2:135708115  | <i>TMEM163</i>  | REACTOME_TRANSCRIPTIONAL_ACTIVITY_OF_SMAD2_SMAD3:SMAD4_HETEROTRIMER                                  |
| 6:31862876   | <i>HLA-DRB5</i> | REACTOME_TRANSCRIPTIONAL_REGULATION_BY_E2F6                                                          |
| 4:114424939  | <i>CAMK2D</i>   | REACTOME_TRANSCRIPTIONAL_REGULATION_BY_MECP2                                                         |
| 4:114494052  | <i>CAMK2D</i>   | REACTOME_TRANSCRIPTIONAL_REGULATION_BY_MECP2                                                         |
| 4:114529492  | <i>CAMK2D</i>   | REACTOME_TRANSCRIPTIONAL_REGULATION_BY_MECP2                                                         |
| 4:114539964  | <i>CAMK2D</i>   | REACTOME_TRANSCRIPTIONAL_REGULATION_BY_MECP2                                                         |
| 4:114597918  | <i>CAMK2D</i>   | REACTOME_TRANSCRIPTIONAL_REGULATION_BY_MECP2                                                         |
| 8:11353586   | <i>CTSB</i>     | REACTOME_TRANSCRIPTIONAL_REGULATION_BY_RUNX1                                                         |
| 8:11363667   | <i>CTSB</i>     | REACTOME_TRANSCRIPTIONAL_REGULATION_BY_RUNX1                                                         |

|              |                 |                                                                                                         |
|--------------|-----------------|---------------------------------------------------------------------------------------------------------|
| 8:11381148   | <i>CTSB</i>     | REACTOME_TRANSCRIPTIONAL_REGULATION_BY_RUNX1                                                            |
| 12:46134812  | <i>SCAF11</i>   | REACTOME_TRANSCRIPTIONAL_REGULATION_BY_RUNX1                                                            |
| 12:46206268  | <i>SCAF11</i>   | REACTOME_TRANSCRIPTIONAL_REGULATION_BY_RUNX1                                                            |
| 14:55515304  | <i>GCH1</i>     | REACTOME_TRANSCRIPTIONAL_REGULATION_BY_RUNX1                                                            |
| 17:42454243  | <i>FAM171A2</i> | REACTOME_TRANSCRIPTIONAL_REGULATION_BY_RUNX1                                                            |
| 19:1611856   | <i>SPPL2B</i>   | REACTOME_TRANSCRIPTIONAL_REGULATION_BY_RUNX1                                                            |
| 6:32941506   | <i>HLA-DRB5</i> | REACTOME_TRANSCRIPTIONAL_REGULATION_BY_RUNX3                                                            |
| 16:30510571  | <i>SETD1A</i>   | REACTOME_TRANSCRIPTIONAL_REGULATION_BY_RUNX3                                                            |
| 16:30516492  | <i>SETD1A</i>   | REACTOME_TRANSCRIPTIONAL_REGULATION_BY_RUNX3                                                            |
| 16:30520856  | <i>SETD1A</i>   | REACTOME_TRANSCRIPTIONAL_REGULATION_BY_RUNX3                                                            |
| 17:7578671   | <i>V1NB1</i>    | REACTOME_TRANSCRIPTIONAL_REGULATION_BY_RUNX3                                                            |
| 2:135708115  | <i>TMEM163</i>  | REACTOME_TRANSCRIPTIONAL_REGULATION_BY_TP53                                                             |
| 5:133558885  | <i>C5orf24</i>  | REACTOME_TRANSCRIPTIONAL_REGULATION_BY_TP53                                                             |
| 6:31862876   | <i>HLA-DRB5</i> | REACTOME_TRANSCRIPTIONAL_REGULATION_BY_TP53                                                             |
| 6:31925679   | <i>HLA-DRB5</i> | REACTOME_TRANSCRIPTIONAL_REGULATION_BY_TP53                                                             |
| 6:33287183   | <i>HLA-DRB5</i> | REACTOME_TRANSCRIPTIONAL_REGULATION_BY_TP53                                                             |
| 8:22974278   | <i>BIN3</i>     | REACTOME_TRANSCRIPTIONAL_REGULATION_BY_TP53                                                             |
| 8:23050400   | <i>BIN3</i>     | REACTOME_TRANSCRIPTIONAL_REGULATION_BY_TP53                                                             |
| 17:7578671   | <i>V1NB1</i>    | REACTOME_TRANSCRIPTIONAL_REGULATION_BY_TP53                                                             |
| 17:59791813  | <i>BRIP1</i>    | REACTOME_TRANSCRIPTIONAL_REGULATION_BY_TP53                                                             |
| 17:59922925  | <i>BRIP1</i>    | REACTOME_TRANSCRIPTIONAL_REGULATION_BY_TP53                                                             |
| 4:17622910   | <i>LCORL</i>    | REACTOME_TRANSCRIPTIONAL_REGULATION_OF_WHITE_ADIPOCYTE_DIFFERENTIATION                                  |
| 17:60124582  | <i>BRIP1</i>    | REACTOME_TRANSCRIPTIONAL_REGULATION_OF_WHITE_ADIPOCYTE_DIFFERENTIATION                                  |
| 12:133206648 | <i>FBRSL1</i>   | REACTOME_TRANSCRIPTION_COUPLED_NUCLEOTIDE_EXCISION_REPAIR_TC_NER                                        |
| 12:133223685 | <i>FBRSL1</i>   | REACTOME_TRANSCRIPTION_COUPLED_NUCLEOTIDE_EXCISION_REPAIR_TC_NER                                        |
| 1:226497419  | <i>ITPKB</i>    | REACTOME_TRANSCRIPTION_OF_E2F_TARGETS_UNDER_NEGATIVE_CONTROL_BY_DREAM_COMPLEX                           |
| 3:48199695   | <i>IP6K2</i>    | REACTOME_TRANSCRIPTION_OF_E2F_TARGETS_UNDER_NEGATIVE_CONTROL_BY_DREAM_COMPLEX                           |
| 3:48214438   | <i>IP6K2</i>    | REACTOME_TRANSCRIPTION_OF_E2F_TARGETS_UNDER_NEGATIVE_CONTROL_BY_DREAM_COMPLEX                           |
| 14:74640180  | <i>RPS6KL1</i>  | REACTOME_TRANSCRIPTION_OF_E2F_TARGETS_UNDER_NEGATIVE_CONTROL_BY_DREAM_COMPLEX                           |
| 1:226497419  | <i>ITPKB</i>    | REACTOME_TRANSCRIPTION_OF_E2F_TARGETS_UNDER_NEGATIVE_CONTROL_BY_P107_RBL1_AND_P130_RBL2_IN_COMPLEX_WITH |
| 14:74640180  | <i>RPS6KL1</i>  | REACTOME_TRANSCRIPTION_OF_E2F_TARGETS_UNDER_NEGATIVE_CONTROL_BY_P107_RBL1_AND_P130_RBL2_IN_COMPLEX_WITH |
| 2:135708115  | <i>TMEM163</i>  | REACTOME_TRANSCRIPTION_OF_THE_HIV_GENOME                                                                |
| 6:31925679   | <i>HLA-DRB5</i> | REACTOME_TRANSCRIPTION_OF_THE_HIV_GENOME                                                                |
| 12:124219791 | <i>HIP1R</i>    | REACTOME_TRANSFERRIN_ENDOCYTOSIS_AND_RECYCLING                                                          |
| 1:226351254  | <i>ITPKB</i>    | REACTOME_TRANS_GOLGI_NETWORK_VESICLE_BUDDING                                                            |
| 1:226372766  | <i>ITPKB</i>    | REACTOME_TRANS_GOLGI_NETWORK_VESICLE_BUDDING                                                            |
| 3:121411876  | <i>KPNA1</i>    | REACTOME_TRANS_GOLGI_NETWORK_VESICLE_BUDDING                                                            |
| 3:121412702  | <i>KPNA1</i>    | REACTOME_TRANS_GOLGI_NETWORK_VESICLE_BUDDING                                                            |
| 4:925376     | <i>GAK</i>      | REACTOME_TRANS_GOLGI_NETWORK_VESICLE_BUDDING                                                            |
| 9:17579690   | <i>SH3GL2_2</i> | REACTOME_TRANS_GOLGI_NETWORK_VESICLE_BUDDING                                                            |
| 9:17587160   | <i>SH3GL2_2</i> | REACTOME_TRANS_GOLGI_NETWORK_VESICLE_BUDDING                                                            |
| 9:17609302   | <i>SH3GL2_2</i> | REACTOME_TRANS_GOLGI_NETWORK_VESICLE_BUDDING                                                            |
| 9:17626762   | <i>SH3GL2_2</i> | REACTOME_TRANS_GOLGI_NETWORK_VESICLE_BUDDING                                                            |
| 9:17627444   | <i>SH3GL2_2</i> | REACTOME_TRANS_GOLGI_NETWORK_VESICLE_BUDDING                                                            |
| 9:17642664   | <i>SH3GL2_2</i> | REACTOME_TRANS_GOLGI_NETWORK_VESICLE_BUDDING                                                            |
| 9:17710876   | <i>SH3GL2_2</i> | REACTOME_TRANS_GOLGI_NETWORK_VESICLE_BUDDING                                                            |
| 9:17732590   | <i>SH3GL2_2</i> | REACTOME_TRANS_GOLGI_NETWORK_VESICLE_BUDDING                                                            |
| 9:17737514   | <i>SH3GL2_2</i> | REACTOME_TRANS_GOLGI_NETWORK_VESICLE_BUDDING                                                            |
| 9:17758945   | <i>SH3GL2_2</i> | REACTOME_TRANS_GOLGI_NETWORK_VESICLE_BUDDING                                                            |
| 10:104005410 | <i>GBF1</i>     | REACTOME_TRANS_GOLGI_NETWORK_VESICLE_BUDDING                                                            |
| 10:104034550 | <i>GBF1</i>     | REACTOME_TRANS_GOLGI_NETWORK_VESICLE_BUDDING                                                            |
| 12:123326598 | <i>HIP1R</i>    | REACTOME_TRANS_GOLGI_NETWORK_VESICLE_BUDDING                                                            |
| 1:155698425  | <i>GBAP1</i>    | REACTOME_TRANSLATION                                                                                    |

|              |                     |                                                                                             |
|--------------|---------------------|---------------------------------------------------------------------------------------------|
| 6:31758240   | <i>HLA-DRB5</i>     | REACTOME_TRANSLATION                                                                        |
| 6:31762311   | <i>HLA-DRB5</i>     | REACTOME_TRANSLATION                                                                        |
| 17:7479140   | <i>V1NB1</i>        | REACTOME_TRANSLATION                                                                        |
| 17:7480325   | <i>V1NB1</i>        | REACTOME_TRANSLATION                                                                        |
| 4:76407998   | <i>FAM47E-STBD1</i> | REACTOME_TRANSLESION_SYNTHESIS_BY_POLH                                                      |
| 6:111628626  | <i>FYN</i>          | REACTOME_TRANSLESION_SYNTHESIS_BY_POLK                                                      |
| 4:76407998   | <i>FAM47E-STBD1</i> | REACTOME_TRANSLESION_SYNTHESIS_BY_Y_FAMILY_DNA_POLYMERASES_BYPASSES_LESIONS_ON_DNA_TEMPLATE |
| 6:111628626  | <i>FYN</i>          | REACTOME_TRANSLESION_SYNTHESIS_BY_Y_FAMILY_DNA_POLYMERASES_BYPASSES_LESIONS_ON_DNA_TEMPLATE |
| 12:133206648 | <i>FBRSL1</i>       | REACTOME_TRANSLESION_SYNTHESIS_BY_Y_FAMILY_DNA_POLYMERASES_BYPASSES_LESIONS_ON_DNA_TEMPLATE |
| 12:133223685 | <i>FBRSL1</i>       | REACTOME_TRANSLESION_SYNTHESIS_BY_Y_FAMILY_DNA_POLYMERASES_BYPASSES_LESIONS_ON_DNA_TEMPLATE |
| 6:32602372   | <i>HLA-DRB5</i>     | REACTOME_TRANSLOCATION_OF_ZAP_70_TO_IMMUNOLOGICAL_SYNAPSE                                   |
| 3:48835245   | <i>IP6K2</i>        | REACTOME_TRANSMISSION_ACROSS_CHEMICAL_SYNAPSES                                              |
| 3:123089448  | <i>KPNA1</i>        | REACTOME_TRANSMISSION_ACROSS_CHEMICAL_SYNAPSES                                              |
| 4:114424939  | <i>CAMK2D</i>       | REACTOME_TRANSMISSION_ACROSS_CHEMICAL_SYNAPSES                                              |
| 4:114494052  | <i>CAMK2D</i>       | REACTOME_TRANSMISSION_ACROSS_CHEMICAL_SYNAPSES                                              |
| 4:114529492  | <i>CAMK2D</i>       | REACTOME_TRANSMISSION_ACROSS_CHEMICAL_SYNAPSES                                              |
| 4:114539964  | <i>CAMK2D</i>       | REACTOME_TRANSMISSION_ACROSS_CHEMICAL_SYNAPSES                                              |
| 4:114597918  | <i>CAMK2D</i>       | REACTOME_TRANSMISSION_ACROSS_CHEMICAL_SYNAPSES                                              |
| 6:29565889   | <i>TRIM40</i>       | REACTOME_TRANSMISSION_ACROSS_CHEMICAL_SYNAPSES                                              |
| 6:29590715   | <i>TRIM40</i>       | REACTOME_TRANSMISSION_ACROSS_CHEMICAL_SYNAPSES                                              |
| 6:72646790   | <i>RIMS1</i>        | REACTOME_TRANSMISSION_ACROSS_CHEMICAL_SYNAPSES                                              |
| 6:72648340   | <i>RIMS1</i>        | REACTOME_TRANSMISSION_ACROSS_CHEMICAL_SYNAPSES                                              |
| 6:72686444   | <i>RIMS1</i>        | REACTOME_TRANSMISSION_ACROSS_CHEMICAL_SYNAPSES                                              |
| 6:72716358   | <i>RIMS1</i>        | REACTOME_TRANSMISSION_ACROSS_CHEMICAL_SYNAPSES                                              |
| 6:72904599   | <i>RIMS1</i>        | REACTOME_TRANSMISSION_ACROSS_CHEMICAL_SYNAPSES                                              |
| 6:72913435   | <i>RIMS1</i>        | REACTOME_TRANSMISSION_ACROSS_CHEMICAL_SYNAPSES                                              |
| 6:72930929   | <i>RIMS1</i>        | REACTOME_TRANSMISSION_ACROSS_CHEMICAL_SYNAPSES                                              |
| 6:72982289   | <i>RIMS1</i>        | REACTOME_TRANSMISSION_ACROSS_CHEMICAL_SYNAPSES                                              |
| 6:72986711   | <i>RIMS1</i>        | REACTOME_TRANSMISSION_ACROSS_CHEMICAL_SYNAPSES                                              |
| 6:73008061   | <i>RIMS1</i>        | REACTOME_TRANSMISSION_ACROSS_CHEMICAL_SYNAPSES                                              |
| 6:73060492   | <i>RIMS1</i>        | REACTOME_TRANSMISSION_ACROSS_CHEMICAL_SYNAPSES                                              |
| 8:131799767  | <i>FAM49B</i>       | REACTOME_TRANSMISSION_ACROSS_CHEMICAL_SYNAPSES                                              |
| 8:131845512  | <i>FAM49B</i>       | REACTOME_TRANSMISSION_ACROSS_CHEMICAL_SYNAPSES                                              |
| 8:131865425  | <i>FAM49B</i>       | REACTOME_TRANSMISSION_ACROSS_CHEMICAL_SYNAPSES                                              |
| 8:131901170  | <i>FAM49B</i>       | REACTOME_TRANSMISSION_ACROSS_CHEMICAL_SYNAPSES                                              |
| 11:83219006  | <i>DLG2</i>         | REACTOME_TRANSMISSION_ACROSS_CHEMICAL_SYNAPSES                                              |
| 11:83232915  | <i>DLG2</i>         | REACTOME_TRANSMISSION_ACROSS_CHEMICAL_SYNAPSES                                              |
| 11:83282740  | <i>DLG2</i>         | REACTOME_TRANSMISSION_ACROSS_CHEMICAL_SYNAPSES                                              |
| 11:83387273  | <i>DLG2</i>         | REACTOME_TRANSMISSION_ACROSS_CHEMICAL_SYNAPSES                                              |
| 11:83538733  | <i>DLG2</i>         | REACTOME_TRANSMISSION_ACROSS_CHEMICAL_SYNAPSES                                              |
| 11:83544472  | <i>DLG2</i>         | REACTOME_TRANSMISSION_ACROSS_CHEMICAL_SYNAPSES                                              |
| 11:83578152  | <i>DLG2</i>         | REACTOME_TRANSMISSION_ACROSS_CHEMICAL_SYNAPSES                                              |
| 11:83647657  | <i>DLG2</i>         | REACTOME_TRANSMISSION_ACROSS_CHEMICAL_SYNAPSES                                              |
| 11:83669903  | <i>DLG2</i>         | REACTOME_TRANSMISSION_ACROSS_CHEMICAL_SYNAPSES                                              |
| 11:83736246  | <i>DLG2</i>         | REACTOME_TRANSMISSION_ACROSS_CHEMICAL_SYNAPSES                                              |
| 11:83762918  | <i>DLG2</i>         | REACTOME_TRANSMISSION_ACROSS_CHEMICAL_SYNAPSES                                              |
| 11:83823752  | <i>DLG2</i>         | REACTOME_TRANSMISSION_ACROSS_CHEMICAL_SYNAPSES                                              |
| 11:83839992  | <i>DLG2</i>         | REACTOME_TRANSMISSION_ACROSS_CHEMICAL_SYNAPSES                                              |
| 11:84104763  | <i>DLG2</i>         | REACTOME_TRANSMISSION_ACROSS_CHEMICAL_SYNAPSES                                              |
| 11:84169039  | <i>DLG2</i>         | REACTOME_TRANSMISSION_ACROSS_CHEMICAL_SYNAPSES                                              |
| 11:84221628  | <i>DLG2</i>         | REACTOME_TRANSMISSION_ACROSS_CHEMICAL_SYNAPSES                                              |
| 11:84312008  | <i>DLG2</i>         | REACTOME_TRANSMISSION_ACROSS_CHEMICAL_SYNAPSES                                              |
| 11:84324361  | <i>DLG2</i>         | REACTOME_TRANSMISSION_ACROSS_CHEMICAL_SYNAPSES                                              |

|             |                 |                                                                                   |
|-------------|-----------------|-----------------------------------------------------------------------------------|
| 11:84360346 | <i>DLG2</i>     | REACTOME_TRANSMISSION_ACROSS_CHEMICAL_SYNAPSES                                    |
| 11:84403409 | <i>DLG2</i>     | REACTOME_TRANSMISSION_ACROSS_CHEMICAL_SYNAPSES                                    |
| 12:46618863 | <i>SCAF11</i>   | REACTOME_TRANSMISSION_ACROSS_CHEMICAL_SYNAPSES                                    |
| 16:50300511 | <i>CASC16</i>   | REACTOME_TRANSMISSION_ACROSS_CHEMICAL_SYNAPSES                                    |
| 16:50317039 | <i>CASC16</i>   | REACTOME_TRANSMISSION_ACROSS_CHEMICAL_SYNAPSES                                    |
| 17:7101771  | <i>V1NB1</i>    | REACTOME_TRANSMISSION_ACROSS_CHEMICAL_SYNAPSES                                    |
| 17:43999203 | <i>WNT3</i>     | REACTOME_TRANSMISSION_ACROSS_CHEMICAL_SYNAPSES                                    |
| 17:44005297 | <i>WNT3</i>     | REACTOME_TRANSMISSION_ACROSS_CHEMICAL_SYNAPSES                                    |
| 17:44019712 | <i>WNT3</i>     | REACTOME_TRANSMISSION_ACROSS_CHEMICAL_SYNAPSES                                    |
| 17:44060492 | <i>WNT3</i>     | REACTOME_TRANSMISSION_ACROSS_CHEMICAL_SYNAPSES                                    |
| 17:44065263 | <i>WNT3</i>     | REACTOME_TRANSMISSION_ACROSS_CHEMICAL_SYNAPSES                                    |
| 17:44081178 | <i>WNT3</i>     | REACTOME_TRANSMISSION_ACROSS_CHEMICAL_SYNAPSES                                    |
| 17:44083297 | <i>WNT3</i>     | REACTOME_TRANSMISSION_ACROSS_CHEMICAL_SYNAPSES                                    |
| 17:44800946 | <i>WNT3</i>     | REACTOME_TRANSMISSION_ACROSS_CHEMICAL_SYNAPSES                                    |
| 17:44833217 | <i>WNT3</i>     | REACTOME_TRANSMISSION_ACROSS_CHEMICAL_SYNAPSES                                    |
| 19:2557113  | <i>SPPL2B</i>   | REACTOME_TRANSMISSION_ACROSS_CHEMICAL_SYNAPSES                                    |
| 19:2563327  | <i>SPPL2B</i>   | REACTOME_TRANSMISSION_ACROSS_CHEMICAL_SYNAPSES                                    |
| 19:2580057  | <i>SPPL2B</i>   | REACTOME_TRANSMISSION_ACROSS_CHEMICAL_SYNAPSES                                    |
| 19:2660983  | <i>SPPL2B</i>   | REACTOME_TRANSMISSION_ACROSS_CHEMICAL_SYNAPSES                                    |
| 21:38984964 | <i>DYRK1A</i>   | REACTOME_TRANSMISSION_ACROSS_CHEMICAL_SYNAPSES                                    |
| 21:39018136 | <i>DYRK1A</i>   | REACTOME_TRANSMISSION_ACROSS_CHEMICAL_SYNAPSES                                    |
| 21:39021814 | <i>DYRK1A</i>   | REACTOME_TRANSMISSION_ACROSS_CHEMICAL_SYNAPSES                                    |
| 21:39039956 | <i>DYRK1A</i>   | REACTOME_TRANSMISSION_ACROSS_CHEMICAL_SYNAPSES                                    |
| 21:39088785 | <i>DYRK1A</i>   | REACTOME_TRANSMISSION_ACROSS_CHEMICAL_SYNAPSES                                    |
| 21:39108160 | <i>DYRK1A</i>   | REACTOME_TRANSMISSION_ACROSS_CHEMICAL_SYNAPSES                                    |
| 21:39120480 | <i>DYRK1A</i>   | REACTOME_TRANSMISSION_ACROSS_CHEMICAL_SYNAPSES                                    |
| 21:39134980 | <i>DYRK1A</i>   | REACTOME_TRANSMISSION_ACROSS_CHEMICAL_SYNAPSES                                    |
| 21:39197323 | <i>DYRK1A</i>   | REACTOME_TRANSMISSION_ACROSS_CHEMICAL_SYNAPSES                                    |
| 21:39217472 | <i>DYRK1A</i>   | REACTOME_TRANSMISSION_ACROSS_CHEMICAL_SYNAPSES                                    |
| 6:31846234  | <i>HLA-DRB5</i> | REACTOME_TRANSPORT_OF_BILE_SALTS_AND_ORGANIC_ACIDS_METAL_IONS_AND_AMINE_COMPOUNDS |
| 12:40240262 | <i>LRRK2_2</i>  | REACTOME_TRANSPORT_OF_BILE_SALTS_AND_ORGANIC_ACIDS_METAL_IONS_AND_AMINE_COMPOUNDS |
| 12:40252360 | <i>LRRK2_2</i>  | REACTOME_TRANSPORT_OF_BILE_SALTS_AND_ORGANIC_ACIDS_METAL_IONS_AND_AMINE_COMPOUNDS |
| 12:40267539 | <i>LRRK2_2</i>  | REACTOME_TRANSPORT_OF_BILE_SALTS_AND_ORGANIC_ACIDS_METAL_IONS_AND_AMINE_COMPOUNDS |
| 12:40302599 | <i>LRRK2_2</i>  | REACTOME_TRANSPORT_OF_BILE_SALTS_AND_ORGANIC_ACIDS_METAL_IONS_AND_AMINE_COMPOUNDS |
| 12:40348056 | <i>LRRK2_2</i>  | REACTOME_TRANSPORT_OF_BILE_SALTS_AND_ORGANIC_ACIDS_METAL_IONS_AND_AMINE_COMPOUNDS |
| 12:40349236 | <i>LRRK2_2</i>  | REACTOME_TRANSPORT_OF_BILE_SALTS_AND_ORGANIC_ACIDS_METAL_IONS_AND_AMINE_COMPOUNDS |
| 12:40378773 | <i>LRRK2_2</i>  | REACTOME_TRANSPORT_OF_BILE_SALTS_AND_ORGANIC_ACIDS_METAL_IONS_AND_AMINE_COMPOUNDS |
| 12:40393852 | <i>LRRK2_2</i>  | REACTOME_TRANSPORT_OF_BILE_SALTS_AND_ORGANIC_ACIDS_METAL_IONS_AND_AMINE_COMPOUNDS |
| 12:40405478 | <i>LRRK2_2</i>  | REACTOME_TRANSPORT_OF_BILE_SALTS_AND_ORGANIC_ACIDS_METAL_IONS_AND_AMINE_COMPOUNDS |
| 12:40413305 | <i>LRRK2_2</i>  | REACTOME_TRANSPORT_OF_BILE_SALTS_AND_ORGANIC_ACIDS_METAL_IONS_AND_AMINE_COMPOUNDS |
| 12:40414626 | <i>LRRK2_2</i>  | REACTOME_TRANSPORT_OF_BILE_SALTS_AND_ORGANIC_ACIDS_METAL_IONS_AND_AMINE_COMPOUNDS |
| 12:40437969 | <i>LRRK2_2</i>  | REACTOME_TRANSPORT_OF_BILE_SALTS_AND_ORGANIC_ACIDS_METAL_IONS_AND_AMINE_COMPOUNDS |
| 17:6594869  | <i>V1NB1</i>    | REACTOME_TRANSPORT_OF_BILE_SALTS_AND_ORGANIC_ACIDS_METAL_IONS_AND_AMINE_COMPOUNDS |
| 17:6612244  | <i>V1NB1</i>    | REACTOME_TRANSPORT_OF_BILE_SALTS_AND_ORGANIC_ACIDS_METAL_IONS_AND_AMINE_COMPOUNDS |
| 1:205884274 | <i>RAB29</i>    | REACTOME_TRANSPORT_OF_INORGANIC_CATIONS_ANIONS_AND_AMINO_ACIDS_OLIGOPEPTIDES      |
| 2:103267601 | <i>MAP4K4</i>   | REACTOME_TRANSPORT_OF_INORGANIC_CATIONS_ANIONS_AND_AMINO_ACIDS_OLIGOPEPTIDES      |
| 2:103282717 | <i>MAP4K4</i>   | REACTOME_TRANSPORT_OF_INORGANIC_CATIONS_ANIONS_AND_AMINO_ACIDS_OLIGOPEPTIDES      |
| 2:103317676 | <i>MAP4K4</i>   | REACTOME_TRANSPORT_OF_INORGANIC_CATIONS_ANIONS_AND_AMINO_ACIDS_OLIGOPEPTIDES      |
| 8:17390689  | <i>FGF20</i>    | REACTOME_TRANSPORT_OF_INORGANIC_CATIONS_ANIONS_AND_AMINO_ACIDS_OLIGOPEPTIDES      |
| 8:17402274  | <i>FGF20</i>    | REACTOME_TRANSPORT_OF_INORGANIC_CATIONS_ANIONS_AND_AMINO_ACIDS_OLIGOPEPTIDES      |
| 8:17427186  | <i>FGF20</i>    | REACTOME_TRANSPORT_OF_INORGANIC_CATIONS_ANIONS_AND_AMINO_ACIDS_OLIGOPEPTIDES      |
| 12:46618863 | <i>SCAF11</i>   | REACTOME_TRANSPORT_OF_INORGANIC_CATIONS_ANIONS_AND_AMINO_ACIDS_OLIGOPEPTIDES      |
| 12:47192323 | <i>SCAF11</i>   | REACTOME_TRANSPORT_OF_INORGANIC_CATIONS_ANIONS_AND_AMINO_ACIDS_OLIGOPEPTIDES      |

|              |                 |                                                                              |
|--------------|-----------------|------------------------------------------------------------------------------|
| 12:47222402  | <i>SCAF11</i>   | REACTOME_TRANSPORT_OF_INORGANIC_CATIONS_ANIONS_AND_AMINO_ACIDS_OLIGOPEPTIDES |
| 17:42332803  | <i>FAM171A2</i> | REACTOME_TRANSPORT_OF_INORGANIC_CATIONS_ANIONS_AND_AMINO_ACIDS_OLIGOPEPTIDES |
| 17:42338993  | <i>FAM171A2</i> | REACTOME_TRANSPORT_OF_INORGANIC_CATIONS_ANIONS_AND_AMINO_ACIDS_OLIGOPEPTIDES |
| 5:101579003  | <i>PAM</i>      | REACTOME_TRANSPORT_OF_ORGANIC_ANIONS                                         |
| 1:154306180  | <i>GBAP1</i>    | REACTOME_TRANSPORT_OF_SMALL_MOLECULES                                        |
| 1:205884274  | <i>RAB29</i>    | REACTOME_TRANSPORT_OF_SMALL_MOLECULES                                        |
| 2:103267601  | <i>MAP4K4</i>   | REACTOME_TRANSPORT_OF_SMALL_MOLECULES                                        |
| 2:103282717  | <i>MAP4K4</i>   | REACTOME_TRANSPORT_OF_SMALL_MOLECULES                                        |
| 2:103317676  | <i>MAP4K4</i>   | REACTOME_TRANSPORT_OF_SMALL_MOLECULES                                        |
| 3:48835245   | <i>IP6K2</i>    | REACTOME_TRANSPORT_OF_SMALL_MOLECULES                                        |
| 3:123089448  | <i>KPNA1</i>    | REACTOME_TRANSPORT_OF_SMALL_MOLECULES                                        |
| 4:15608677   | <i>BST1</i>     | REACTOME_TRANSPORT_OF_SMALL_MOLECULES                                        |
| 4:15618898   | <i>BST1</i>     | REACTOME_TRANSPORT_OF_SMALL_MOLECULES                                        |
| 4:114424939  | <i>CAMK2D</i>   | REACTOME_TRANSPORT_OF_SMALL_MOLECULES                                        |
| 4:114494052  | <i>CAMK2D</i>   | REACTOME_TRANSPORT_OF_SMALL_MOLECULES                                        |
| 4:114529492  | <i>CAMK2D</i>   | REACTOME_TRANSPORT_OF_SMALL_MOLECULES                                        |
| 4:114539964  | <i>CAMK2D</i>   | REACTOME_TRANSPORT_OF_SMALL_MOLECULES                                        |
| 4:114597918  | <i>CAMK2D</i>   | REACTOME_TRANSPORT_OF_SMALL_MOLECULES                                        |
| 4:170563153  | <i>CLCN3</i>    | REACTOME_TRANSPORT_OF_SMALL_MOLECULES                                        |
| 4:170569172  | <i>CLCN3</i>    | REACTOME_TRANSPORT_OF_SMALL_MOLECULES                                        |
| 4:170620812  | <i>CLCN3</i>    | REACTOME_TRANSPORT_OF_SMALL_MOLECULES                                        |
| 5:101579003  | <i>PAM</i>      | REACTOME_TRANSPORT_OF_SMALL_MOLECULES                                        |
| 6:31846234   | <i>HLA-DRB5</i> | REACTOME_TRANSPORT_OF_SMALL_MOLECULES                                        |
| 6:32151443   | <i>HLA-DRB5</i> | REACTOME_TRANSPORT_OF_SMALL_MOLECULES                                        |
| 8:16929685   | <i>FGF20</i>    | REACTOME_TRANSPORT_OF_SMALL_MOLECULES                                        |
| 8:16967392   | <i>FGF20</i>    | REACTOME_TRANSPORT_OF_SMALL_MOLECULES                                        |
| 8:16971257   | <i>FGF20</i>    | REACTOME_TRANSPORT_OF_SMALL_MOLECULES                                        |
| 8:17390689   | <i>FGF20</i>    | REACTOME_TRANSPORT_OF_SMALL_MOLECULES                                        |
| 8:17402274   | <i>FGF20</i>    | REACTOME_TRANSPORT_OF_SMALL_MOLECULES                                        |
| 8:17427186   | <i>FGF20</i>    | REACTOME_TRANSPORT_OF_SMALL_MOLECULES                                        |
| 8:131799767  | <i>FAM49B</i>   | REACTOME_TRANSPORT_OF_SMALL_MOLECULES                                        |
| 8:131845512  | <i>FAM49B</i>   | REACTOME_TRANSPORT_OF_SMALL_MOLECULES                                        |
| 8:131865425  | <i>FAM49B</i>   | REACTOME_TRANSPORT_OF_SMALL_MOLECULES                                        |
| 8:131901170  | <i>FAM49B</i>   | REACTOME_TRANSPORT_OF_SMALL_MOLECULES                                        |
| 9:33447547   | <i>UBAP2</i>    | REACTOME_TRANSPORT_OF_SMALL_MOLECULES                                        |
| 12:39960237  | <i>LRRK2_2</i>  | REACTOME_TRANSPORT_OF_SMALL_MOLECULES                                        |
| 12:40240262  | <i>LRRK2_2</i>  | REACTOME_TRANSPORT_OF_SMALL_MOLECULES                                        |
| 12:40252360  | <i>LRRK2_2</i>  | REACTOME_TRANSPORT_OF_SMALL_MOLECULES                                        |
| 12:40267539  | <i>LRRK2_2</i>  | REACTOME_TRANSPORT_OF_SMALL_MOLECULES                                        |
| 12:40302599  | <i>LRRK2_2</i>  | REACTOME_TRANSPORT_OF_SMALL_MOLECULES                                        |
| 12:40348056  | <i>LRRK2_2</i>  | REACTOME_TRANSPORT_OF_SMALL_MOLECULES                                        |
| 12:40349236  | <i>LRRK2_2</i>  | REACTOME_TRANSPORT_OF_SMALL_MOLECULES                                        |
| 12:40378773  | <i>LRRK2_2</i>  | REACTOME_TRANSPORT_OF_SMALL_MOLECULES                                        |
| 12:40393852  | <i>LRRK2_2</i>  | REACTOME_TRANSPORT_OF_SMALL_MOLECULES                                        |
| 12:40405478  | <i>LRRK2_2</i>  | REACTOME_TRANSPORT_OF_SMALL_MOLECULES                                        |
| 12:40413305  | <i>LRRK2_2</i>  | REACTOME_TRANSPORT_OF_SMALL_MOLECULES                                        |
| 12:40414626  | <i>LRRK2_2</i>  | REACTOME_TRANSPORT_OF_SMALL_MOLECULES                                        |
| 12:40437969  | <i>LRRK2_2</i>  | REACTOME_TRANSPORT_OF_SMALL_MOLECULES                                        |
| 12:45755099  | <i>SCAF11</i>   | REACTOME_TRANSPORT_OF_SMALL_MOLECULES                                        |
| 12:46618863  | <i>SCAF11</i>   | REACTOME_TRANSPORT_OF_SMALL_MOLECULES                                        |
| 12:47192323  | <i>SCAF11</i>   | REACTOME_TRANSPORT_OF_SMALL_MOLECULES                                        |
| 12:47222402  | <i>SCAF11</i>   | REACTOME_TRANSPORT_OF_SMALL_MOLECULES                                        |
| 12:123453034 | <i>HIP1R</i>    | REACTOME_TRANSPORT_OF_SMALL_MOLECULES                                        |

|              |                     |                                                                  |
|--------------|---------------------|------------------------------------------------------------------|
| 12:124219791 | <i>HIP1R</i>        | REACTOME_TRANSPORT_OF_SMALL_MOLECULES                            |
| 16:50300511  | <i>CASC16</i>       | REACTOME_TRANSPORT_OF_SMALL_MOLECULES                            |
| 16:50317039  | <i>CASC16</i>       | REACTOME_TRANSPORT_OF_SMALL_MOLECULES                            |
| 17:6594869   | <i>V1NB1</i>        | REACTOME_TRANSPORT_OF_SMALL_MOLECULES                            |
| 17:6612244   | <i>V1NB1</i>        | REACTOME_TRANSPORT_OF_SMALL_MOLECULES                            |
| 17:7560294   | <i>V1NB1</i>        | REACTOME_TRANSPORT_OF_SMALL_MOLECULES                            |
| 17:40938261  | <i>RETREG3</i>      | REACTOME_TRANSPORT_OF_SMALL_MOLECULES                            |
| 17:42332803  | <i>FAM171A2</i>     | REACTOME_TRANSPORT_OF_SMALL_MOLECULES                            |
| 17:42338993  | <i>FAM171A2</i>     | REACTOME_TRANSPORT_OF_SMALL_MOLECULES                            |
| 19:1811130   | <i>SPPL2B</i>       | REACTOME_TRANSPORT_OF_SMALL_MOLECULES                            |
| 19:2557113   | <i>SPPL2B</i>       | REACTOME_TRANSPORT_OF_SMALL_MOLECULES                            |
| 19:2563327   | <i>SPPL2B</i>       | REACTOME_TRANSPORT_OF_SMALL_MOLECULES                            |
| 19:2580057   | <i>SPPL2B</i>       | REACTOME_TRANSPORT_OF_SMALL_MOLECULES                            |
| 19:2660983   | <i>SPPL2B</i>       | REACTOME_TRANSPORT_OF_SMALL_MOLECULES                            |
| 5:101579003  | <i>PAM</i>          | REACTOME_TRANSPORT_OF_VITAMINS_NUCLEOSIDES_AND_RELATED_MOLECULES |
| 2:134902070  | <i>TMEM163</i>      | REACTOME_TRANSPORT_TO_THE_GOLGI_AND_SUBSEQUENT_MODIFICATION      |
| 2:134932210  | <i>TMEM163</i>      | REACTOME_TRANSPORT_TO_THE_GOLGI_AND_SUBSEQUENT_MODIFICATION      |
| 2:134956835  | <i>TMEM163</i>      | REACTOME_TRANSPORT_TO_THE_GOLGI_AND_SUBSEQUENT_MODIFICATION      |
| 2:134986578  | <i>TMEM163</i>      | REACTOME_TRANSPORT_TO_THE_GOLGI_AND_SUBSEQUENT_MODIFICATION      |
| 2:134993021  | <i>TMEM163</i>      | REACTOME_TRANSPORT_TO_THE_GOLGI_AND_SUBSEQUENT_MODIFICATION      |
| 2:135035038  | <i>TMEM163</i>      | REACTOME_TRANSPORT_TO_THE_GOLGI_AND_SUBSEQUENT_MODIFICATION      |
| 2:135040234  | <i>TMEM163</i>      | REACTOME_TRANSPORT_TO_THE_GOLGI_AND_SUBSEQUENT_MODIFICATION      |
| 2:135165078  | <i>TMEM163</i>      | REACTOME_TRANSPORT_TO_THE_GOLGI_AND_SUBSEQUENT_MODIFICATION      |
| 2:135166385  | <i>TMEM163</i>      | REACTOME_TRANSPORT_TO_THE_GOLGI_AND_SUBSEQUENT_MODIFICATION      |
| 3:121411876  | <i>KPNA1</i>        | REACTOME_TRANSPORT_TO_THE_GOLGI_AND_SUBSEQUENT_MODIFICATION      |
| 3:121412702  | <i>KPNA1</i>        | REACTOME_TRANSPORT_TO_THE_GOLGI_AND_SUBSEQUENT_MODIFICATION      |
| 3:122986429  | <i>KPNA1</i>        | REACTOME_TRANSPORT_TO_THE_GOLGI_AND_SUBSEQUENT_MODIFICATION      |
| 4:76695927   | <i>FAM47E-STBD1</i> | REACTOME_TRANSPORT_TO_THE_GOLGI_AND_SUBSEQUENT_MODIFICATION      |
| 4:113947327  | <i>CAMK2D</i>       | REACTOME_TRANSPORT_TO_THE_GOLGI_AND_SUBSEQUENT_MODIFICATION      |
| 4:114015252  | <i>CAMK2D</i>       | REACTOME_TRANSPORT_TO_THE_GOLGI_AND_SUBSEQUENT_MODIFICATION      |
| 4:114032570  | <i>CAMK2D</i>       | REACTOME_TRANSPORT_TO_THE_GOLGI_AND_SUBSEQUENT_MODIFICATION      |
| 4:114067233  | <i>CAMK2D</i>       | REACTOME_TRANSPORT_TO_THE_GOLGI_AND_SUBSEQUENT_MODIFICATION      |
| 4:114077386  | <i>CAMK2D</i>       | REACTOME_TRANSPORT_TO_THE_GOLGI_AND_SUBSEQUENT_MODIFICATION      |
| 4:114113772  | <i>CAMK2D</i>       | REACTOME_TRANSPORT_TO_THE_GOLGI_AND_SUBSEQUENT_MODIFICATION      |
| 4:114122398  | <i>CAMK2D</i>       | REACTOME_TRANSPORT_TO_THE_GOLGI_AND_SUBSEQUENT_MODIFICATION      |
| 4:114172749  | <i>CAMK2D</i>       | REACTOME_TRANSPORT_TO_THE_GOLGI_AND_SUBSEQUENT_MODIFICATION      |
| 4:114217997  | <i>CAMK2D</i>       | REACTOME_TRANSPORT_TO_THE_GOLGI_AND_SUBSEQUENT_MODIFICATION      |
| 10:104005410 | <i>GBF1</i>         | REACTOME_TRANSPORT_TO_THE_GOLGI_AND_SUBSEQUENT_MODIFICATION      |
| 10:104034550 | <i>GBF1</i>         | REACTOME_TRANSPORT_TO_THE_GOLGI_AND_SUBSEQUENT_MODIFICATION      |
| 10:104258303 | <i>GBF1</i>         | REACTOME_TRANSPORT_TO_THE_GOLGI_AND_SUBSEQUENT_MODIFICATION      |
| 10:121669571 | <i>INPP5F</i>       | REACTOME_TRANSPORT_TO_THE_GOLGI_AND_SUBSEQUENT_MODIFICATION      |
| 10:121683206 | <i>INPP5F</i>       | REACTOME_TRANSPORT_TO_THE_GOLGI_AND_SUBSEQUENT_MODIFICATION      |
| 10:121686714 | <i>INPP5F</i>       | REACTOME_TRANSPORT_TO_THE_GOLGI_AND_SUBSEQUENT_MODIFICATION      |
| 10:121689030 | <i>INPP5F</i>       | REACTOME_TRANSPORT_TO_THE_GOLGI_AND_SUBSEQUENT_MODIFICATION      |
| 17:44800946  | <i>WNT3</i>         | REACTOME_TRANSPORT_TO_THE_GOLGI_AND_SUBSEQUENT_MODIFICATION      |
| 17:44833217  | <i>WNT3</i>         | REACTOME_TRANSPORT_TO_THE_GOLGI_AND_SUBSEQUENT_MODIFICATION      |
| 17:45020426  | <i>WNT3</i>         | REACTOME_TRANSPORT_TO_THE_GOLGI_AND_SUBSEQUENT_MODIFICATION      |
| 17:45059032  | <i>WNT3</i>         | REACTOME_TRANSPORT_TO_THE_GOLGI_AND_SUBSEQUENT_MODIFICATION      |
| 17:45089680  | <i>WNT3</i>         | REACTOME_TRANSPORT_TO_THE_GOLGI_AND_SUBSEQUENT_MODIFICATION      |
| 5:133558885  | <i>C5orf24</i>      | REACTOME_TRIF_TICAM1_MEDIATED_TLR4_SIGNALING                     |
| 6:32151443   | <i>HLA-DRB5</i>     | REACTOME_TRIF_TICAM1_MEDIATED_TLR4_SIGNALING                     |
| 10:103185542 | <i>GBF1</i>         | REACTOME_TRIF_TICAM1_MEDIATED_TLR4_SIGNALING                     |
| 10:103305087 | <i>GBF1</i>         | REACTOME_TRIF_TICAM1_MEDIATED_TLR4_SIGNALING                     |

|              |                     |                                                                        |
|--------------|---------------------|------------------------------------------------------------------------|
| 10:103308244 | <i>GBF1</i>         | REACTOME_TRIF_TICAM1_MEDIATED_TLR4_SIGNALING                           |
| 16:50730088  | <i>CASC16</i>       | REACTOME_TRIF_TICAM1_MEDIATED_TLR4_SIGNALING                           |
| 16:50730446  | <i>CASC16</i>       | REACTOME_TRIF_TICAM1_MEDIATED_TLR4_SIGNALING                           |
| 16:50745926  | <i>CASC16</i>       | REACTOME_TRIF_TICAM1_MEDIATED_TLR4_SIGNALING                           |
| 17:41845031  | <i>FAM171A2</i>     | REACTOME_TRIF_TICAM1_MEDIATED_TLR4_SIGNALING                           |
| 6:31758240   | <i>HLA-DRB5</i>     | REACTOME_TRNA_AMINOACYLATION                                           |
| 6:31762311   | <i>HLA-DRB5</i>     | REACTOME_TRNA_AMINOACYLATION                                           |
| 7:66487445   | <i>GS1-124K5.11</i> | REACTOME_TRNA_MODIFICATION_IN_THE_NUCLEUS_AND_CYTOSOL                  |
| 7:66543959   | <i>GS1-124K5.11</i> | REACTOME_TRNA_MODIFICATION_IN_THE_NUCLEUS_AND_CYTOSOL                  |
| 7:66638082   | <i>GS1-124K5.11</i> | REACTOME_TRNA_MODIFICATION_IN_THE_NUCLEUS_AND_CYTOSOL                  |
| 7:66487445   | <i>GS1-124K5.11</i> | REACTOME_TRNA_PROCESSING                                               |
| 7:66543959   | <i>GS1-124K5.11</i> | REACTOME_TRNA_PROCESSING                                               |
| 7:66638082   | <i>GS1-124K5.11</i> | REACTOME_TRNA_PROCESSING                                               |
| 16:19085298  | <i>SYT17</i>        | REACTOME_UBIQUINOL_BIOSYNTHESIS                                        |
| 16:19090194  | <i>SYT17</i>        | REACTOME_UBIQUINOL_BIOSYNTHESIS                                        |
| 3:48199695   | <i>IP6K2</i>        | REACTOME_UB_SPECIFIC_PROCESSING_PROTEASES                              |
| 3:48214438   | <i>IP6K2</i>        | REACTOME_UB_SPECIFIC_PROCESSING_PROTEASES                              |
| 3:49740895   | <i>IP6K2</i>        | REACTOME_UB_SPECIFIC_PROCESSING_PROTEASES                              |
| 16:19562008  | <i>SYT17</i>        | REACTOME_UB_SPECIFIC_PROCESSING_PROTEASES                              |
| 16:50790891  | <i>CASC16</i>       | REACTOME_UB_SPECIFIC_PROCESSING_PROTEASES                              |
| 17:7578671   | <i>V1NB1</i>        | REACTOME_UB_SPECIFIC_PROCESSING_PROTEASES                              |
| 4:114424939  | <i>CAMK2D</i>       | REACTOME_UNBLOCKING_OF_NMDA_RECEPTORS_GLUTAMATE_BINDING_AND_ACTIVATION |
| 4:114494052  | <i>CAMK2D</i>       | REACTOME_UNBLOCKING_OF_NMDA_RECEPTORS_GLUTAMATE_BINDING_AND_ACTIVATION |
| 4:114529492  | <i>CAMK2D</i>       | REACTOME_UNBLOCKING_OF_NMDA_RECEPTORS_GLUTAMATE_BINDING_AND_ACTIVATION |
| 4:114539964  | <i>CAMK2D</i>       | REACTOME_UNBLOCKING_OF_NMDA_RECEPTORS_GLUTAMATE_BINDING_AND_ACTIVATION |
| 4:114597918  | <i>CAMK2D</i>       | REACTOME_UNBLOCKING_OF_NMDA_RECEPTORS_GLUTAMATE_BINDING_AND_ACTIVATION |
| 11:83219006  | <i>DLG2</i>         | REACTOME_UNBLOCKING_OF_NMDA_RECEPTORS_GLUTAMATE_BINDING_AND_ACTIVATION |
| 11:83232915  | <i>DLG2</i>         | REACTOME_UNBLOCKING_OF_NMDA_RECEPTORS_GLUTAMATE_BINDING_AND_ACTIVATION |
| 11:83282740  | <i>DLG2</i>         | REACTOME_UNBLOCKING_OF_NMDA_RECEPTORS_GLUTAMATE_BINDING_AND_ACTIVATION |
| 11:83387273  | <i>DLG2</i>         | REACTOME_UNBLOCKING_OF_NMDA_RECEPTORS_GLUTAMATE_BINDING_AND_ACTIVATION |
| 11:83538733  | <i>DLG2</i>         | REACTOME_UNBLOCKING_OF_NMDA_RECEPTORS_GLUTAMATE_BINDING_AND_ACTIVATION |
| 11:83544472  | <i>DLG2</i>         | REACTOME_UNBLOCKING_OF_NMDA_RECEPTORS_GLUTAMATE_BINDING_AND_ACTIVATION |
| 11:83578152  | <i>DLG2</i>         | REACTOME_UNBLOCKING_OF_NMDA_RECEPTORS_GLUTAMATE_BINDING_AND_ACTIVATION |
| 11:83647657  | <i>DLG2</i>         | REACTOME_UNBLOCKING_OF_NMDA_RECEPTORS_GLUTAMATE_BINDING_AND_ACTIVATION |
| 11:83669903  | <i>DLG2</i>         | REACTOME_UNBLOCKING_OF_NMDA_RECEPTORS_GLUTAMATE_BINDING_AND_ACTIVATION |
| 11:83736246  | <i>DLG2</i>         | REACTOME_UNBLOCKING_OF_NMDA_RECEPTORS_GLUTAMATE_BINDING_AND_ACTIVATION |
| 11:83762918  | <i>DLG2</i>         | REACTOME_UNBLOCKING_OF_NMDA_RECEPTORS_GLUTAMATE_BINDING_AND_ACTIVATION |
| 11:83823752  | <i>DLG2</i>         | REACTOME_UNBLOCKING_OF_NMDA_RECEPTORS_GLUTAMATE_BINDING_AND_ACTIVATION |
| 11:83839992  | <i>DLG2</i>         | REACTOME_UNBLOCKING_OF_NMDA_RECEPTORS_GLUTAMATE_BINDING_AND_ACTIVATION |
| 11:84104763  | <i>DLG2</i>         | REACTOME_UNBLOCKING_OF_NMDA_RECEPTORS_GLUTAMATE_BINDING_AND_ACTIVATION |
| 11:84169039  | <i>DLG2</i>         | REACTOME_UNBLOCKING_OF_NMDA_RECEPTORS_GLUTAMATE_BINDING_AND_ACTIVATION |
| 11:84221628  | <i>DLG2</i>         | REACTOME_UNBLOCKING_OF_NMDA_RECEPTORS_GLUTAMATE_BINDING_AND_ACTIVATION |
| 11:84312008  | <i>DLG2</i>         | REACTOME_UNBLOCKING_OF_NMDA_RECEPTORS_GLUTAMATE_BINDING_AND_ACTIVATION |
| 11:84324361  | <i>DLG2</i>         | REACTOME_UNBLOCKING_OF_NMDA_RECEPTORS_GLUTAMATE_BINDING_AND_ACTIVATION |
| 11:84360346  | <i>DLG2</i>         | REACTOME_UNBLOCKING_OF_NMDA_RECEPTORS_GLUTAMATE_BINDING_AND_ACTIVATION |
| 11:84403409  | <i>DLG2</i>         | REACTOME_UNBLOCKING_OF_NMDA_RECEPTORS_GLUTAMATE_BINDING_AND_ACTIVATION |
| 17:7101771   | <i>V1NB1</i>        | REACTOME_UNBLOCKING_OF_NMDA_RECEPTORS_GLUTAMATE_BINDING_AND_ACTIVATION |
| 1:156059276  | <i>GBAP1</i>        | REACTOME_UNFOLDED_PROTEIN_RESPONSE_UPR                                 |
| 1:161875645  | <i>FCGR2A</i>       | REACTOME_UNFOLDED_PROTEIN_RESPONSE_UPR                                 |
| 1:161930954  | <i>FCGR2A</i>       | REACTOME_UNFOLDED_PROTEIN_RESPONSE_UPR                                 |
| 3:122841099  | <i>KPNA1</i>        | REACTOME_UNFOLDED_PROTEIN_RESPONSE_UPR                                 |
| 3:122859868  | <i>KPNA1</i>        | REACTOME_UNFOLDED_PROTEIN_RESPONSE_UPR                                 |
| 3:122898729  | <i>KPNA1</i>        | REACTOME_UNFOLDED_PROTEIN_RESPONSE_UPR                                 |

|             |                     |                                                                       |
|-------------|---------------------|-----------------------------------------------------------------------|
| 3:150298317 | <i>MED12L</i>       | REACTOME_UNFOLDED_PROTEIN_RESPONSE_UPR                                |
| 3:150303590 | <i>MED12L</i>       | REACTOME_UNFOLDED_PROTEIN_RESPONSE_UPR                                |
| 17:45020426 | <i>WNT3</i>         | REACTOME_UNFOLDED_PROTEIN_RESPONSE_UPR                                |
| 17:45059032 | <i>WNT3</i>         | REACTOME_UNFOLDED_PROTEIN_RESPONSE_UPR                                |
| 17:45089680 | <i>WNT3</i>         | REACTOME_UNFOLDED_PROTEIN_RESPONSE_UPR                                |
| 20:5934513  | <i>CRLS1</i>        | REACTOME_UNWINDING_OF_DNA                                             |
| 20:5935522  | <i>CRLS1</i>        | REACTOME_UNWINDING_OF_DNA                                             |
| 20:5968737  | <i>CRLS1</i>        | REACTOME_UNWINDING_OF_DNA                                             |
| 20:5968964  | <i>CRLS1</i>        | REACTOME_UNWINDING_OF_DNA                                             |
| 16:31004169 | <i>SETD1A</i>       | REACTOME_UPTAKE_AND_ACTIONS_OF_BACTERIAL_TOXINS                       |
| 3:48835245  | <i>IP6K2</i>        | REACTOME_VASOPRESSIN_REGULATES_RENAL_WATER_HOMEOSTASIS_VIA_AQUAPORINS |
| 3:123089448 | <i>KPNA1</i>        | REACTOME_VASOPRESSIN_REGULATES_RENAL_WATER_HOMEOSTASIS_VIA_AQUAPORINS |
| 8:131799767 | <i>FAM49B</i>       | REACTOME_VASOPRESSIN_REGULATES_RENAL_WATER_HOMEOSTASIS_VIA_AQUAPORINS |
| 8:131845512 | <i>FAM49B</i>       | REACTOME_VASOPRESSIN_REGULATES_RENAL_WATER_HOMEOSTASIS_VIA_AQUAPORINS |
| 8:131865425 | <i>FAM49B</i>       | REACTOME_VASOPRESSIN_REGULATES_RENAL_WATER_HOMEOSTASIS_VIA_AQUAPORINS |
| 8:131901170 | <i>FAM49B</i>       | REACTOME_VASOPRESSIN_REGULATES_RENAL_WATER_HOMEOSTASIS_VIA_AQUAPORINS |
| 9:33447547  | <i>UBAP2</i>        | REACTOME_VASOPRESSIN_REGULATES_RENAL_WATER_HOMEOSTASIS_VIA_AQUAPORINS |
| 16:50300511 | <i>CASC16</i>       | REACTOME_VASOPRESSIN_REGULATES_RENAL_WATER_HOMEOSTASIS_VIA_AQUAPORINS |
| 16:50317039 | <i>CASC16</i>       | REACTOME_VASOPRESSIN_REGULATES_RENAL_WATER_HOMEOSTASIS_VIA_AQUAPORINS |
| 19:2557113  | <i>SPPL2B</i>       | REACTOME_VASOPRESSIN_REGULATES_RENAL_WATER_HOMEOSTASIS_VIA_AQUAPORINS |
| 19:2563327  | <i>SPPL2B</i>       | REACTOME_VASOPRESSIN_REGULATES_RENAL_WATER_HOMEOSTASIS_VIA_AQUAPORINS |
| 19:2580057  | <i>SPPL2B</i>       | REACTOME_VASOPRESSIN_REGULATES_RENAL_WATER_HOMEOSTASIS_VIA_AQUAPORINS |
| 19:2660983  | <i>SPPL2B</i>       | REACTOME_VASOPRESSIN_REGULATES_RENAL_WATER_HOMEOSTASIS_VIA_AQUAPORINS |
| 17:39883520 | <i>RETREG3</i>      | REACTOME_VEGFR2_MEDIATED_VASCULAR_PERMEABILITY                        |
| 1:155847427 | <i>GBAP1</i>        | REACTOME_VESICLE_MEDIATED_TRANSPORT                                   |
| 1:171689486 | <i>VAMP4</i>        | REACTOME_VESICLE_MEDIATED_TRANSPORT                                   |
| 1:171837985 | <i>VAMP4</i>        | REACTOME_VESICLE_MEDIATED_TRANSPORT                                   |
| 1:171945488 | <i>VAMP4</i>        | REACTOME_VESICLE_MEDIATED_TRANSPORT                                   |
| 1:172137119 | <i>VAMP4</i>        | REACTOME_VESICLE_MEDIATED_TRANSPORT                                   |
| 1:172386261 | <i>VAMP4</i>        | REACTOME_VESICLE_MEDIATED_TRANSPORT                                   |
| 1:226351254 | <i>ITPKB</i>        | REACTOME_VESICLE_MEDIATED_TRANSPORT                                   |
| 1:226372766 | <i>ITPKB</i>        | REACTOME_VESICLE_MEDIATED_TRANSPORT                                   |
| 2:135921205 | <i>TMEM163</i>      | REACTOME_VESICLE_MEDIATED_TRANSPORT                                   |
| 2:170012307 | <i>STK39</i>        | REACTOME_VESICLE_MEDIATED_TRANSPORT                                   |
| 2:170028024 | <i>STK39</i>        | REACTOME_VESICLE_MEDIATED_TRANSPORT                                   |
| 2:170066424 | <i>STK39</i>        | REACTOME_VESICLE_MEDIATED_TRANSPORT                                   |
| 3:121411876 | <i>KPNA1</i>        | REACTOME_VESICLE_MEDIATED_TRANSPORT                                   |
| 3:121412702 | <i>KPNA1</i>        | REACTOME_VESICLE_MEDIATED_TRANSPORT                                   |
| 3:122986429 | <i>KPNA1</i>        | REACTOME_VESICLE_MEDIATED_TRANSPORT                                   |
| 4:925376    | <i>GAK</i>          | REACTOME_VESICLE_MEDIATED_TRANSPORT                                   |
| 4:76695927  | <i>FAM47E-STBD1</i> | REACTOME_VESICLE_MEDIATED_TRANSPORT                                   |
| 4:77104152  | <i>FAM47E-STBD1</i> | REACTOME_VESICLE_MEDIATED_TRANSPORT                                   |
| 4:77124196  | <i>FAM47E-STBD1</i> | REACTOME_VESICLE_MEDIATED_TRANSPORT                                   |
| 4:77134786  | <i>FAM47E-STBD1</i> | REACTOME_VESICLE_MEDIATED_TRANSPORT                                   |
| 4:113947327 | <i>CAMK2D</i>       | REACTOME_VESICLE_MEDIATED_TRANSPORT                                   |
| 4:114015252 | <i>CAMK2D</i>       | REACTOME_VESICLE_MEDIATED_TRANSPORT                                   |
| 4:114032570 | <i>CAMK2D</i>       | REACTOME_VESICLE_MEDIATED_TRANSPORT                                   |
| 4:114067233 | <i>CAMK2D</i>       | REACTOME_VESICLE_MEDIATED_TRANSPORT                                   |
| 4:114077386 | <i>CAMK2D</i>       | REACTOME_VESICLE_MEDIATED_TRANSPORT                                   |
| 4:114113772 | <i>CAMK2D</i>       | REACTOME_VESICLE_MEDIATED_TRANSPORT                                   |
| 4:114122398 | <i>CAMK2D</i>       | REACTOME_VESICLE_MEDIATED_TRANSPORT                                   |
| 4:114172749 | <i>CAMK2D</i>       | REACTOME_VESICLE_MEDIATED_TRANSPORT                                   |
| 4:114217997 | <i>CAMK2D</i>       | REACTOME_VESICLE_MEDIATED_TRANSPORT                                   |

|              |                 |                                             |
|--------------|-----------------|---------------------------------------------|
| 8:16086683   | <i>FGF20</i>    | REACTOME_VESICLE_MEDIATED_TRANSPORT         |
| 8:16135246   | <i>FGF20</i>    | REACTOME_VESICLE_MEDIATED_TRANSPORT         |
| 8:17125768   | <i>FGF20</i>    | REACTOME_VESICLE_MEDIATED_TRANSPORT         |
| 9:17579690   | <i>SH3GL2_2</i> | REACTOME_VESICLE_MEDIATED_TRANSPORT         |
| 9:17587160   | <i>SH3GL2_2</i> | REACTOME_VESICLE_MEDIATED_TRANSPORT         |
| 9:17609302   | <i>SH3GL2_2</i> | REACTOME_VESICLE_MEDIATED_TRANSPORT         |
| 9:17626762   | <i>SH3GL2_2</i> | REACTOME_VESICLE_MEDIATED_TRANSPORT         |
| 9:17627444   | <i>SH3GL2_2</i> | REACTOME_VESICLE_MEDIATED_TRANSPORT         |
| 9:17642664   | <i>SH3GL2_2</i> | REACTOME_VESICLE_MEDIATED_TRANSPORT         |
| 9:17710876   | <i>SH3GL2_2</i> | REACTOME_VESICLE_MEDIATED_TRANSPORT         |
| 9:17732590   | <i>SH3GL2_2</i> | REACTOME_VESICLE_MEDIATED_TRANSPORT         |
| 9:17737514   | <i>SH3GL2_2</i> | REACTOME_VESICLE_MEDIATED_TRANSPORT         |
| 9:17758945   | <i>SH3GL2_2</i> | REACTOME_VESICLE_MEDIATED_TRANSPORT         |
| 10:104005410 | <i>GBF1</i>     | REACTOME_VESICLE_MEDIATED_TRANSPORT         |
| 10:104034550 | <i>GBF1</i>     | REACTOME_VESICLE_MEDIATED_TRANSPORT         |
| 10:104258303 | <i>GBF1</i>     | REACTOME_VESICLE_MEDIATED_TRANSPORT         |
| 10:121669571 | <i>INPP5F</i>   | REACTOME_VESICLE_MEDIATED_TRANSPORT         |
| 10:121683206 | <i>INPP5F</i>   | REACTOME_VESICLE_MEDIATED_TRANSPORT         |
| 10:121686714 | <i>INPP5F</i>   | REACTOME_VESICLE_MEDIATED_TRANSPORT         |
| 10:121689030 | <i>INPP5F</i>   | REACTOME_VESICLE_MEDIATED_TRANSPORT         |
| 11:82719121  | <i>DLG2</i>     | REACTOME_VESICLE_MEDIATED_TRANSPORT         |
| 12:39759090  | <i>LRRK2_2</i>  | REACTOME_VESICLE_MEDIATED_TRANSPORT         |
| 12:39826709  | <i>LRRK2_2</i>  | REACTOME_VESICLE_MEDIATED_TRANSPORT         |
| 12:123326598 | <i>HIP1R</i>    | REACTOME_VESICLE_MEDIATED_TRANSPORT         |
| 17:7129974   | <i>V1NB1</i>    | REACTOME_VESICLE_MEDIATED_TRANSPORT         |
| 17:43017194  | <i>CRHR1_2</i>  | REACTOME_VESICLE_MEDIATED_TRANSPORT         |
| 17:43021962  | <i>CRHR1_2</i>  | REACTOME_VESICLE_MEDIATED_TRANSPORT         |
| 17:44800946  | <i>WNT3</i>     | REACTOME_VESICLE_MEDIATED_TRANSPORT         |
| 17:44833217  | <i>WNT3</i>     | REACTOME_VESICLE_MEDIATED_TRANSPORT         |
| 17:45020426  | <i>WNT3</i>     | REACTOME_VESICLE_MEDIATED_TRANSPORT         |
| 17:45059032  | <i>WNT3</i>     | REACTOME_VESICLE_MEDIATED_TRANSPORT         |
| 17:45089680  | <i>WNT3</i>     | REACTOME_VESICLE_MEDIATED_TRANSPORT         |
| 17:76727455  | <i>DNAH17</i>   | REACTOME_VESICLE_MEDIATED_TRANSPORT         |
| 2:170012307  | <i>STK39</i>    | REACTOME_VISUAL_PHOTOTRANSDUCTION           |
| 2:170028024  | <i>STK39</i>    | REACTOME_VISUAL_PHOTOTRANSDUCTION           |
| 2:170066424  | <i>STK39</i>    | REACTOME_VISUAL_PHOTOTRANSDUCTION           |
| 10:15199347  | <i>ITGA8</i>    | REACTOME_VISUAL_PHOTOTRANSDUCTION           |
| 17:43181287  | <i>CRHR1_2</i>  | REACTOME_VISUAL_PHOTOTRANSDUCTION           |
| 17:43184627  | <i>CRHR1_2</i>  | REACTOME_VISUAL_PHOTOTRANSDUCTION           |
| 6:133025715  | <i>RPS12</i>    | REACTOME_VITAMIN_B5_PANTOTHENATE_METABOLISM |
| 6:133028870  | <i>RPS12</i>    | REACTOME_VITAMIN_B5_PANTOTHENATE_METABOLISM |
| 6:133075265  | <i>RPS12</i>    | REACTOME_VITAMIN_B5_PANTOTHENATE_METABOLISM |
| 2:170012307  | <i>STK39</i>    | REACTOME_VITAMIN_D_CALCIFEROL_METABOLISM    |
| 2:170028024  | <i>STK39</i>    | REACTOME_VITAMIN_D_CALCIFEROL_METABOLISM    |
| 2:170066424  | <i>STK39</i>    | REACTOME_VITAMIN_D_CALCIFEROL_METABOLISM    |
| 2:18091890   | <i>KCNS3</i>    | REACTOME_VOLTAGE_GATED_POTASSIUM_CHANNELS   |
| 2:18130187   | <i>KCNS3</i>    | REACTOME_VOLTAGE_GATED_POTASSIUM_CHANNELS   |
| 2:18141542   | <i>KCNS3</i>    | REACTOME_VOLTAGE_GATED_POTASSIUM_CHANNELS   |
| 2:18143082   | <i>KCNS3</i>    | REACTOME_VOLTAGE_GATED_POTASSIUM_CHANNELS   |
| 2:18176120   | <i>KCNS3</i>    | REACTOME_VOLTAGE_GATED_POTASSIUM_CHANNELS   |
| 2:18247777   | <i>KCNS3</i>    | REACTOME_VOLTAGE_GATED_POTASSIUM_CHANNELS   |
| 2:18299564   | <i>KCNS3</i>    | REACTOME_VOLTAGE_GATED_POTASSIUM_CHANNELS   |
| 2:18315537   | <i>KCNS3</i>    | REACTOME_VOLTAGE_GATED_POTASSIUM_CHANNELS   |

|              |         |                                                        |
|--------------|---------|--------------------------------------------------------|
| 2:18335515   | KCNS3   | REACTOME_VOLTAGE_GATED_POTASSIUM_CHANNELS              |
| 2:18455049   | KCNS3   | REACTOME_VOLTAGE_GATED_POTASSIUM_CHANNELS              |
| 2:18472861   | KCNS3   | REACTOME_VOLTAGE_GATED_POTASSIUM_CHANNELS              |
| 3:19236100   | SATB1   | REACTOME_VOLTAGE_GATED_POTASSIUM_CHANNELS              |
| 3:19312697   | SATB1   | REACTOME_VOLTAGE_GATED_POTASSIUM_CHANNELS              |
| 3:19329968   | SATB1   | REACTOME_VOLTAGE_GATED_POTASSIUM_CHANNELS              |
| 3:19334895   | SATB1   | REACTOME_VOLTAGE_GATED_POTASSIUM_CHANNELS              |
| 3:19352476   | SATB1   | REACTOME_VOLTAGE_GATED_POTASSIUM_CHANNELS              |
| 6:73383348   | RIMS1   | REACTOME_VOLTAGE_GATED_POTASSIUM_CHANNELS              |
| 6:73448086   | RIMS1   | REACTOME_VOLTAGE_GATED_POTASSIUM_CHANNELS              |
| 17:7832034   | V1NB1   | REACTOME_VOLTAGE_GATED_POTASSIUM_CHANNELS              |
| 8:131145058  | FAM49B  | REACTOME_VXPX_CARGO_TARGETING_TO_CILIUM                |
| 8:131153067  | FAM49B  | REACTOME_VXPX_CARGO_TARGETING_TO_CILIUM                |
| 8:131245821  | FAM49B  | REACTOME_VXPX_CARGO_TARGETING_TO_CILIUM                |
| 8:131328260  | FAM49B  | REACTOME_VXPX_CARGO_TARGETING_TO_CILIUM                |
| 8:131404984  | FAM49B  | REACTOME_VXPX_CARGO_TARGETING_TO_CILIUM                |
| 8:131408202  | FAM49B  | REACTOME_VXPX_CARGO_TARGETING_TO_CILIUM                |
| 8:131455469  | FAM49B  | REACTOME_VXPX_CARGO_TARGETING_TO_CILIUM                |
| 10:104005410 | GBF1    | REACTOME_VXPX_CARGO_TARGETING_TO_CILIUM                |
| 10:104034550 | GBF1    | REACTOME_VXPX_CARGO_TARGETING_TO_CILIUM                |
| 17:7129974   | V1NB1   | REACTOME_WNT5A_DEPENDENT_INTERNALIZATION_OF_FZD4       |
| 17:44843651  | WNT3    | REACTOME_WNT_LIGAND_BIOGENESIS_AND_TRAFFICKING         |
| 17:44870978  | WNT3    | REACTOME_WNT_LIGAND_BIOGENESIS_AND_TRAFFICKING         |
| 17:44871422  | WNT3    | REACTOME_WNT_LIGAND_BIOGENESIS_AND_TRAFFICKING         |
| 17:44888209  | WNT3    | REACTOME_WNT_LIGAND_BIOGENESIS_AND_TRAFFICKING         |
| 17:44888715  | WNT3    | REACTOME_WNT_LIGAND_BIOGENESIS_AND_TRAFFICKING         |
| 17:44906949  | WNT3    | REACTOME_WNT_LIGAND_BIOGENESIS_AND_TRAFFICKING         |
| 17:44912901  | WNT3    | REACTOME_WNT_LIGAND_BIOGENESIS_AND_TRAFFICKING         |
| 17:44931399  | WNT3    | REACTOME_WNT_LIGAND_BIOGENESIS_AND_TRAFFICKING         |
| 17:44947756  | WNT3    | REACTOME_WNT_LIGAND_BIOGENESIS_AND_TRAFFICKING         |
| 17:7129974   | V1NB1   | REACTOME_WNT_MEDIATED_ACTIVATION_OF_DVL                |
| 8:11558567   | CTSB    | REACTOME_YAP1_AND_WWTR1_TAZ_STIMULATED_GENE_EXPRESSION |
| 8:11599269   | CTSB    | REACTOME_YAP1_AND_WWTR1_TAZ_STIMULATED_GENE_EXPRESSION |
| 1:226568665  | ITPKB   | SA_CASPASE_CASCADE                                     |
| 17:7578671   | V1NB1   | SA_G1_AND_S_PHASES                                     |
| 3:48199695   | IP6K2   | SA_G2_AND_M_PHASES                                     |
| 3:48214438   | IP6K2   | SA_G2_AND_M_PHASES                                     |
| 4:170477125  | CLCN3   | SA_G2_AND_M_PHASES                                     |
| 3:49406095   | IP6K2   | SA_TRKA_RECEPTOR                                       |
| 3:49424231   | IP6K2   | SA_TRKA_RECEPTOR                                       |
| 3:49450137   | IP6K2   | SA_TRKA_RECEPTOR                                       |
| 3:49561208   | IP6K2   | SIG_BCR_SIGNALING_PATHWAY                              |
| 5:133558885  | C5orf24 | WNT_SIGNALING                                          |
| 10:103185542 | GBF1    | WNT_SIGNALING                                          |
| 10:103305087 | GBF1    | WNT_SIGNALING                                          |
| 10:103308244 | GBF1    | WNT_SIGNALING                                          |
| 16:50612930  | CASC16  | WNT_SIGNALING                                          |
| 16:50643086  | CASC16  | WNT_SIGNALING                                          |
| 17:7129974   | V1NB1   | WNT_SIGNALING                                          |
| 17:44843651  | WNT3    | WNT_SIGNALING                                          |
| 17:44870978  | WNT3    | WNT_SIGNALING                                          |
| 17:44871422  | WNT3    | WNT_SIGNALING                                          |
| 17:44888209  | WNT3    | WNT_SIGNALING                                          |

|             |        |               |
|-------------|--------|---------------|
| 17:44888715 | WNT3   | WNT_SIGNALING |
| 17:44906949 | WNT3   | WNT_SIGNALING |
| 19:3008151  | SPPL2B | WNT_SIGNALING |
| 19:3024077  | SPPL2B | WNT_SIGNALING |

## b) TESTING PHASE

| SNP          | Gene     | Gene-set                        |
|--------------|----------|---------------------------------|
| 17:7352976   | V1NB1    | BIOCARTA_ACH_PATHWAY            |
| 3:48835245   | IP6K2    | BIOCARTA_AGPCR_PATHWAY          |
| 3:49561208   | IP6K2    | BIOCARTA_AGR_PATHWAY            |
| 6:112561154  | FYN      | BIOCARTA_AGR_PATHWAY            |
| 3:48835245   | IP6K2    | BIOCARTA_AKAP13_PATHWAY         |
| 3:49406095   | IP6K2    | BIOCARTA_AKAP13_PATHWAY         |
| 3:49424231   | IP6K2    | BIOCARTA_AKAP13_PATHWAY         |
| 3:49450137   | IP6K2    | BIOCARTA_AKAP13_PATHWAY         |
| 3:48835245   | IP6K2    | BIOCARTA_AKAP95_PATHWAY         |
| 3:48835245   | IP6K2    | BIOCARTA_AKAPCENTROSOME_PATHWAY |
| 3:49406095   | IP6K2    | BIOCARTA_AKAPCENTROSOME_PATHWAY |
| 3:49424231   | IP6K2    | BIOCARTA_AKAPCENTROSOME_PATHWAY |
| 3:49450137   | IP6K2    | BIOCARTA_AKAPCENTROSOME_PATHWAY |
| 6:31897219   | HLA-DRB5 | BIOCARTA_ALTERNATIVE_PATHWAY    |
| 8:131153067  | FAM49B   | BIOCARTA_ARAP_PATHWAY           |
| 8:131190319  | FAM49B   | BIOCARTA_ARAP_PATHWAY           |
| 8:131427864  | FAM49B   | BIOCARTA_ARAP_PATHWAY           |
| 10:104005410 | GBF1     | BIOCARTA_ARAP_PATHWAY           |
| 10:104034550 | GBF1     | BIOCARTA_ARAP_PATHWAY           |
| 17:76727455  | DNAH17   | BIOCARTA_ARAP_PATHWAY           |
| 17:7578671   | V1NB1    | BIOCARTA_ARF_PATHWAY            |
| 17:7578671   | V1NB1    | BIOCARTA_ATM_PATHWAY            |
| 17:7578671   | V1NB1    | BIOCARTA_ATRBRCA_PATHWAY        |
| 3:48835245   | IP6K2    | BIOCARTA_BAD_PATHWAY            |
| 6:112009427  | FYN      | BIOCARTA_BIOPEPTIDES_PATHWAY    |
| 6:112056759  | FYN      | BIOCARTA_BIOPEPTIDES_PATHWAY    |
| 6:112151452  | FYN      | BIOCARTA_BIOPEPTIDES_PATHWAY    |
| 16:30510571  | SETD1A   | BIOCARTA_BLYMPHOCYTE_PATHWAY    |
| 16:30516492  | SETD1A   | BIOCARTA_BLYMPHOCYTE_PATHWAY    |
| 16:30520856  | SETD1A   | BIOCARTA_BLYMPHOCYTE_PATHWAY    |
| 17:7578671   | V1NB1    | BIOCARTA_BTG2_PATHWAY           |
| 3:49406095   | IP6K2    | BIOCARTA_CARDIACEGF_PATHWAY     |
| 3:49424231   | IP6K2    | BIOCARTA_CARDIACEGF_PATHWAY     |
| 3:49450137   | IP6K2    | BIOCARTA_CARDIACEGF_PATHWAY     |
| 3:48835245   | IP6K2    | BIOCARTA_CARM1_PATHWAY          |
| 1:156059276  | GBAP1    | BIOCARTA_CASPASE_PATHWAY        |
| 3:49406095   | IP6K2    | BIOCARTA_CCR3_PATHWAY           |
| 3:49424231   | IP6K2    | BIOCARTA_CCR3_PATHWAY           |
| 3:49450137   | IP6K2    | BIOCARTA_CCR3_PATHWAY           |
| 17:43390763  | CRHR1_2  | BIOCARTA_CD40_PATHWAY           |
| 3:48199695   | IP6K2    | BIOCARTA_CDC25_PATHWAY          |
| 3:48214438   | IP6K2    | BIOCARTA_CDC25_PATHWAY          |
| 3:49406095   | IP6K2    | BIOCARTA_CDC42RAC_PATHWAY       |

|             |                 |                            |
|-------------|-----------------|----------------------------|
| 3:49424231  | <i>IP6K2</i>    | BIOCARTA_CDC42RAC_PATHWAY  |
| 3:49450137  | <i>IP6K2</i>    | BIOCARTA_CDC42RAC_PATHWAY  |
| 3:48199695  | <i>IP6K2</i>    | BIOCARTA_CELLCYCLE_PATHWAY |
| 3:48214438  | <i>IP6K2</i>    | BIOCARTA_CELLCYCLE_PATHWAY |
| 3:48835245  | <i>IP6K2</i>    | BIOCARTA_CFTR_PATHWAY      |
| 17:7578671  | <i>V1NB1</i>    | BIOCARTA_CHEMICAL_PATHWAY  |
| 3:48835245  | <i>IP6K2</i>    | BIOCARTA_CHREBP_PATHWAY    |
| 3:48835245  | <i>IP6K2</i>    | BIOCARTA_CK1_PATHWAY       |
| 6:31873292  | <i>HLA-DRB5</i> | BIOCARTA_CLASSIC_PATHWAY   |
| 6:31879377  | <i>HLA-DRB5</i> | BIOCARTA_CLASSIC_PATHWAY   |
| 6:31895092  | <i>HLA-DRB5</i> | BIOCARTA_CLASSIC_PATHWAY   |
| 6:31897219  | <i>HLA-DRB5</i> | BIOCARTA_CLASSIC_PATHWAY   |
| 6:31873292  | <i>HLA-DRB5</i> | BIOCARTA_COMP_PATHWAY      |
| 6:31879377  | <i>HLA-DRB5</i> | BIOCARTA_COMP_PATHWAY      |
| 6:31895092  | <i>HLA-DRB5</i> | BIOCARTA_COMP_PATHWAY      |
| 6:31897219  | <i>HLA-DRB5</i> | BIOCARTA_COMP_PATHWAY      |
| 3:48835245  | <i>IP6K2</i>    | BIOCARTA_CREB_PATHWAY      |
| 3:48835245  | <i>IP6K2</i>    | BIOCARTA_CSK_PATHWAY       |
| 17:7578671  | <i>V1NB1</i>    | BIOCARTA_CTCF_PATHWAY      |
| 16:30510571 | <i>SETD1A</i>   | BIOCARTA_CTL_PATHWAY       |
| 16:30516492 | <i>SETD1A</i>   | BIOCARTA_CTL_PATHWAY       |
| 16:30520856 | <i>SETD1A</i>   | BIOCARTA_CTL_PATHWAY       |
| 16:31370452 | <i>SETD1A</i>   | BIOCARTA_DC_PATHWAY        |
| 1:156059276 | <i>GBAP1</i>    | BIOCARTA_DEATH_PATHWAY     |
| 17:43390763 | <i>CRHR1_2</i>  | BIOCARTA_DEATH_PATHWAY     |
| 3:48835245  | <i>IP6K2</i>    | BIOCARTA_DREAM_PATHWAY     |
| 3:49406095  | <i>IP6K2</i>    | BIOCARTA_ECM_PATHWAY       |
| 3:49424231  | <i>IP6K2</i>    | BIOCARTA_ECM_PATHWAY       |
| 3:49450137  | <i>IP6K2</i>    | BIOCARTA_ECM_PATHWAY       |
| 6:112009427 | <i>FYN</i>      | BIOCARTA_ECM_PATHWAY       |
| 6:112056759 | <i>FYN</i>      | BIOCARTA_ECM_PATHWAY       |
| 6:112151452 | <i>FYN</i>      | BIOCARTA_ECM_PATHWAY       |
| 3:49406095  | <i>IP6K2</i>    | BIOCARTA_EDG1_PATHWAY      |
| 3:49424231  | <i>IP6K2</i>    | BIOCARTA_EDG1_PATHWAY      |
| 3:49450137  | <i>IP6K2</i>    | BIOCARTA_EDG1_PATHWAY      |
| 17:7578671  | <i>V1NB1</i>    | BIOCARTA_EFP_PATHWAY       |
| 17:7479140  | <i>V1NB1</i>    | BIOCARTA_EIF4_PATHWAY      |
| 17:7480325  | <i>V1NB1</i>    | BIOCARTA_EIF4_PATHWAY      |
| 17:7479140  | <i>V1NB1</i>    | BIOCARTA_EIF_PATHWAY       |
| 17:7480325  | <i>V1NB1</i>    | BIOCARTA_EIF_PATHWAY       |
| 6:112009427 | <i>FYN</i>      | BIOCARTA_EPHA4_PATHWAY     |
| 6:112056759 | <i>FYN</i>      | BIOCARTA_EPHA4_PATHWAY     |
| 6:112151452 | <i>FYN</i>      | BIOCARTA_EPHA4_PATHWAY     |
| 17:40392358 | <i>RETREG3</i>  | BIOCARTA_EPO_PATHWAY       |
| 1:156059276 | <i>GBAP1</i>    | BIOCARTA_FAS_PATHWAY       |
| 19:3156505  | <i>SPPL2B</i>   | BIOCARTA FMLP_PATHWAY      |
| 3:48199695  | <i>IP6K2</i>    | BIOCARTA_G1_PATHWAY        |
| 3:48214438  | <i>IP6K2</i>    | BIOCARTA_G1_PATHWAY        |
| 17:7578671  | <i>V1NB1</i>    | BIOCARTA_G1_PATHWAY        |
| 3:48199695  | <i>IP6K2</i>    | BIOCARTA_G2_PATHWAY        |
| 3:48214438  | <i>IP6K2</i>    | BIOCARTA_G2_PATHWAY        |
| 17:7578671  | <i>V1NB1</i>    | BIOCARTA_G2_PATHWAY        |
| 17:44800946 | <i>WNT3</i>     | BIOCARTA_GABA_PATHWAY      |

|              |          |                               |
|--------------|----------|-------------------------------|
| 17:44833217  | WNT3     | BIOCARTA_GABA_PATHWAY         |
| 3:48835245   | IP6K2    | BIOCARTA_GATA3_PATHWAY        |
| 17:40392358  | RETREG3  | BIOCARTA_GH_PATHWAY           |
| 7:22311894   | GPNMB    | BIOCARTA_GHRELIN_PATHWAY      |
| 17:40392358  | RETREG3  | BIOCARTA_GLEEVEC_PATHWAY      |
| 3:48835245   | IP6K2    | BIOCARTA_GPCR_PATHWAY         |
| 16:30510571  | SETD1A   | BIOCARTA_GRANULOCYTES_PATHWAY |
| 16:30516492  | SETD1A   | BIOCARTA_GRANULOCYTES_PATHWAY |
| 16:30520856  | SETD1A   | BIOCARTA_GRANULOCYTES_PATHWAY |
| 17:8025979   | V1NB1    | BIOCARTA_HES_PATHWAY          |
| 1:156059276  | GBAP1    | BIOCARTA_HIVNEF_PATHWAY       |
| 1:227067656  | ITPKB    | BIOCARTA_HIVNEF_PATHWAY       |
| 17:43390763  | CRHR1_2  | BIOCARTA_HIVNEF_PATHWAY       |
| 3:48835245   | IP6K2    | BIOCARTA_IGF1R_PATHWAY        |
| 17:43390763  | CRHR1_2  | BIOCARTA_IL1R_PATHWAY         |
| 17:40392358  | RETREG3  | BIOCARTA_IL22BP_PATHWAY       |
| 17:40392358  | RETREG3  | BIOCARTA_IL2_PATHWAY          |
| 17:40392358  | RETREG3  | BIOCARTA_IL2RB_PATHWAY        |
| 17:40392358  | RETREG3  | BIOCARTA_IL3_PATHWAY          |
| 6:112009427  | FYN      | BIOCARTA_IL7_PATHWAY          |
| 6:112056759  | FYN      | BIOCARTA_IL7_PATHWAY          |
| 6:112151452  | FYN      | BIOCARTA_IL7_PATHWAY          |
| 17:40392358  | RETREG3  | BIOCARTA_IL7_PATHWAY          |
| 3:49406095   | IP6K2    | BIOCARTA_INTEGRIN_PATHWAY     |
| 3:49424231   | IP6K2    | BIOCARTA_INTEGRIN_PATHWAY     |
| 3:49450137   | IP6K2    | BIOCARTA_INTEGRIN_PATHWAY     |
| 6:112009427  | FYN      | BIOCARTA_INTEGRIN_PATHWAY     |
| 6:112056759  | FYN      | BIOCARTA_INTEGRIN_PATHWAY     |
| 6:112151452  | FYN      | BIOCARTA_INTEGRIN_PATHWAY     |
| 17:7479140   | V1NB1    | BIOCARTA_IRES_PATHWAY         |
| 17:7480325   | V1NB1    | BIOCARTA_IRES_PATHWAY         |
| 17:43390763  | CRHR1_2  | BIOCARTA_KERATINOCYTE_PATHWAY |
| 16:30510571  | SETD1A   | BIOCARTA_LAIR_PATHWAY         |
| 16:30516492  | SETD1A   | BIOCARTA_LAIR_PATHWAY         |
| 16:30520856  | SETD1A   | BIOCARTA_LAIR_PATHWAY         |
| 6:31873292   | HLA-DRB5 | BIOCARTA_LECTIN_PATHWAY       |
| 6:31879377   | HLA-DRB5 | BIOCARTA_LECTIN_PATHWAY       |
| 6:31895092   | HLA-DRB5 | BIOCARTA_LECTIN_PATHWAY       |
| 6:31897219   | HLA-DRB5 | BIOCARTA_LECTIN_PATHWAY       |
| 12:122816734 | HIP1R    | BIOCARTA_LIS1_PATHWAY         |
| 12:122817580 | HIP1R    | BIOCARTA_LIS1_PATHWAY         |
| 12:122853197 | HIP1R    | BIOCARTA_LIS1_PATHWAY         |
| 17:7631694   | V1NB1    | BIOCARTA_LIS1_PATHWAY         |
| 17:7682605   | V1NB1    | BIOCARTA_LIS1_PATHWAY         |
| 16:30510571  | SETD1A   | BIOCARTA_LYM_PATHWAY          |
| 16:30516492  | SETD1A   | BIOCARTA_LYM_PATHWAY          |
| 16:30520856  | SETD1A   | BIOCARTA_LYM_PATHWAY          |
| 16:30510571  | SETD1A   | BIOCARTA_LYMPHOCYTE_PATHWAY   |
| 16:30516492  | SETD1A   | BIOCARTA_LYMPHOCYTE_PATHWAY   |
| 16:30520856  | SETD1A   | BIOCARTA_LYMPHOCYTE_PATHWAY   |
| 3:49406095   | IP6K2    | BIOCARTA_MAL_PATHWAY          |
| 3:49424231   | IP6K2    | BIOCARTA_MAL_PATHWAY          |
| 3:49450137   | IP6K2    | BIOCARTA_MAL_PATHWAY          |

|             |          |                             |
|-------------|----------|-----------------------------|
| 2:102357447 | MAP4K4   | BIOCARTA_MAPK_PATHWAY       |
| 2:102413116 | MAP4K4   | BIOCARTA_MAPK_PATHWAY       |
| 17:43390763 | CRHR1_2  | BIOCARTA_MAPK_PATHWAY       |
| 3:48835245  | IP6K2    | BIOCARTA_MCALPAIN_PATHWAY   |
| 6:32789400  | HLA-DRB5 | BIOCARTA_MHC_PATHWAY        |
| 6:32791831  | HLA-DRB5 | BIOCARTA_MHC_PATHWAY        |
| 6:32797361  | HLA-DRB5 | BIOCARTA_MHC_PATHWAY        |
| 6:32802462  | HLA-DRB5 | BIOCARTA_MHC_PATHWAY        |
| 6:32814942  | HLA-DRB5 | BIOCARTA_MHC_PATHWAY        |
| 16:30510571 | SETD1A   | BIOCARTA_MONOCYTE_PATHWAY   |
| 16:30516492 | SETD1A   | BIOCARTA_MONOCYTE_PATHWAY   |
| 16:30520856 | SETD1A   | BIOCARTA_MONOCYTE_PATHWAY   |
| 3:48835245  | IP6K2    | BIOCARTA_MPR_PATHWAY        |
| 17:7479140  | V1NB1    | BIOCARTA_MTOR_PATHWAY       |
| 17:7480325  | V1NB1    | BIOCARTA_MTOR_PATHWAY       |
| 16:30510571 | SETD1A   | BIOCARTA_NEUTROPHIL_PATHWAY |
| 16:30516492 | SETD1A   | BIOCARTA_NEUTROPHIL_PATHWAY |
| 16:30520856 | SETD1A   | BIOCARTA_NEUTROPHIL_PATHWAY |
| 3:48835245  | IP6K2    | BIOCARTA_NFAT_PATHWAY       |
| 17:43390763 | CRHR1_2  | BIOCARTA_NFKB_PATHWAY       |
| 3:48835245  | IP6K2    | BIOCARTA_NO1_PATHWAY        |
| 3:48835245  | IP6K2    | BIOCARTA_NOS1_PATHWAY       |
| 17:7101771  | V1NB1    | BIOCARTA_NOS1_PATHWAY       |
| 17:43390763 | CRHR1_2  | BIOCARTA_NTHI_PATHWAY       |
| 12:39960237 | LRRK2_2  | BIOCARTA_NUCLEARRS_PATHWAY  |
| 17:7578671  | V1NB1    | BIOCARTA_P53HYPOXIA_PATHWAY |
| 17:7578671  | V1NB1    | BIOCARTA_P53_PATHWAY        |
| 3:49406095  | IP6K2    | BIOCARTA_PAR1_PATHWAY       |
| 3:49424231  | IP6K2    | BIOCARTA_PAR1_PATHWAY       |
| 3:49450137  | IP6K2    | BIOCARTA_PAR1_PATHWAY       |
| 4:90677243  | SNCA_2   | BIOCARTA_PARKIN_PATHWAY     |
| 4:90700329  | SNCA_2   | BIOCARTA_PARKIN_PATHWAY     |
| 4:90727315  | SNCA_2   | BIOCARTA_PARKIN_PATHWAY     |
| 4:90738839  | SNCA_2   | BIOCARTA_PARKIN_PATHWAY     |
| 4:90757294  | SNCA_2   | BIOCARTA_PARKIN_PATHWAY     |
| 11:83188607 | DLG2     | BIOCARTA_PDZS_PATHWAY       |
| 11:83219006 | DLG2     | BIOCARTA_PDZS_PATHWAY       |
| 11:83538733 | DLG2     | BIOCARTA_PDZS_PATHWAY       |
| 11:83544472 | DLG2     | BIOCARTA_PDZS_PATHWAY       |
| 11:83656201 | DLG2     | BIOCARTA_PDZS_PATHWAY       |
| 11:83700228 | DLG2     | BIOCARTA_PDZS_PATHWAY       |
| 11:83762918 | DLG2     | BIOCARTA_PDZS_PATHWAY       |
| 11:83894247 | DLG2     | BIOCARTA_PDZS_PATHWAY       |
| 11:84021037 | DLG2     | BIOCARTA_PDZS_PATHWAY       |
| 11:84324361 | DLG2     | BIOCARTA_PDZS_PATHWAY       |
| 11:84373496 | DLG2     | BIOCARTA_PDZS_PATHWAY       |
| 11:84403409 | DLG2     | BIOCARTA_PDZS_PATHWAY       |
| 17:7101771  | V1NB1    | BIOCARTA_PDZS_PATHWAY       |
| 17:42423844 | FAM171A2 | BIOCARTA_PEPI_PATHWAY       |
| 3:48835245  | IP6K2    | BIOCARTA_PLCE_PATHWAY       |
| 17:7578671  | V1NB1    | BIOCARTA_PLK3_PATHWAY       |
| 17:7578671  | V1NB1    | BIOCARTA_PML_PATHWAY        |
| 3:48835245  | IP6K2    | BIOCARTA_PPARA_PATHWAY      |

|              |                |                             |
|--------------|----------------|-----------------------------|
| 17:40392358  | <i>RETREG3</i> | BIOCARTA_PPARG_PATHWAY      |
| 10:103185542 | <i>GBF1</i>    | BIOCARTA_PS1_PATHWAY        |
| 10:103308244 | <i>GBF1</i>    | BIOCARTA_PS1_PATHWAY        |
| 3:48199695   | <i>IP6K2</i>   | BIOCARTA_PTC1_PATHWAY       |
| 3:48214438   | <i>IP6K2</i>   | BIOCARTA_PTC1_PATHWAY       |
| 1:155975202  | <i>GBAP1</i>   | BIOCARTA_PTDINS_PATHWAY     |
| 3:49406095   | <i>IP6K2</i>   | BIOCARTA_RACCYCD_PATHWAY    |
| 3:49424231   | <i>IP6K2</i>   | BIOCARTA_RACCYCD_PATHWAY    |
| 3:49450137   | <i>IP6K2</i>   | BIOCARTA_RACCYCD_PATHWAY    |
| 3:49406095   | <i>IP6K2</i>   | BIOCARTA_RAS_PATHWAY        |
| 3:49424231   | <i>IP6K2</i>   | BIOCARTA_RAS_PATHWAY        |
| 3:49450137   | <i>IP6K2</i>   | BIOCARTA_RAS_PATHWAY        |
| 3:48199695   | <i>IP6K2</i>   | BIOCARTA_RB_PATHWAY         |
| 3:48214438   | <i>IP6K2</i>   | BIOCARTA_RB_PATHWAY         |
| 17:7578671   | <i>V1NB1</i>   | BIOCARTA_RB_PATHWAY         |
| 6:112009427  | <i>FYN</i>     | BIOCARTA_REELIN_PATHWAY     |
| 6:112056759  | <i>FYN</i>     | BIOCARTA_REELIN_PATHWAY     |
| 6:112151452  | <i>FYN</i>     | BIOCARTA_REELIN_PATHWAY     |
| 3:49406095   | <i>IP6K2</i>   | BIOCARTA_RHO_PATHWAY        |
| 3:49424231   | <i>IP6K2</i>   | BIOCARTA_RHO_PATHWAY        |
| 3:49450137   | <i>IP6K2</i>   | BIOCARTA_RHO_PATHWAY        |
| 17:7578671   | <i>V1NB1</i>   | BIOCARTA_RNA_PATHWAY        |
| 17:43390763  | <i>CRHR1_2</i> | BIOCARTA_RNA_PATHWAY        |
| 3:48835245   | <i>IP6K2</i>   | BIOCARTA_SHH_PATHWAY        |
| 10:104285824 | <i>GBF1</i>    | BIOCARTA_SHH_PATHWAY        |
| 21:38740824  | <i>DYRK1A</i>  | BIOCARTA_SHH_PATHWAY        |
| 21:38770530  | <i>DYRK1A</i>  | BIOCARTA_SHH_PATHWAY        |
| 3:48199695   | <i>IP6K2</i>   | BIOCARTA_SRCRPT_PATHWAY     |
| 3:48214438   | <i>IP6K2</i>   | BIOCARTA_SRCRPT_PATHWAY     |
| 3:48835245   | <i>IP6K2</i>   | BIOCARTA_STATHMIN_PATHWAY   |
| 17:43390763  | <i>CRHR1_2</i> | BIOCARTA_STRESS_PATHWAY     |
| 17:7455536   | <i>V1NB1</i>   | BIOCARTA_TALL1_PATHWAY      |
| 17:43390763  | <i>CRHR1_2</i> | BIOCARTA_TALL1_PATHWAY      |
| 6:112009427  | <i>FYN</i>     | BIOCARTA_TCRA_PATHWAY       |
| 6:112056759  | <i>FYN</i>     | BIOCARTA_TCRA_PATHWAY       |
| 6:112151452  | <i>FYN</i>     | BIOCARTA_TCRA_PATHWAY       |
| 6:112009427  | <i>FYN</i>     | BIOCARTA_TCR_PATHWAY        |
| 6:112056759  | <i>FYN</i>     | BIOCARTA_TCR_PATHWAY        |
| 6:112151452  | <i>FYN</i>     | BIOCARTA_TCR_PATHWAY        |
| 16:30510571  | <i>SETD1A</i>  | BIOCARTA_TCYTOTOXIC_PATHWAY |
| 16:30516492  | <i>SETD1A</i>  | BIOCARTA_TCYTOTOXIC_PATHWAY |
| 16:30520856  | <i>SETD1A</i>  | BIOCARTA_TCYTOTOXIC_PATHWAY |
| 17:7578671   | <i>V1NB1</i>   | BIOCARTA_TEL_PATHWAY        |
| 17:7578671   | <i>V1NB1</i>   | BIOCARTA_TERT_PATHWAY       |
| 3:49406095   | <i>IP6K2</i>   | BIOCARTA_TFF_PATHWAY        |
| 3:49424231   | <i>IP6K2</i>   | BIOCARTA_TFF_PATHWAY        |
| 3:49450137   | <i>IP6K2</i>   | BIOCARTA_TFF_PATHWAY        |
| 16:30510571  | <i>SETD1A</i>  | BIOCARTA_THELPER_PATHWAY    |
| 16:30516492  | <i>SETD1A</i>  | BIOCARTA_THELPER_PATHWAY    |
| 16:30520856  | <i>SETD1A</i>  | BIOCARTA_THELPER_PATHWAY    |
| 17:7578671   | <i>V1NB1</i>   | BIOCARTA_TID_PATHWAY        |
| 1:156059276  | <i>GBAP1</i>   | BIOCARTA_TNFR1_PATHWAY      |
| 17:43390763  | <i>CRHR1_2</i> | BIOCARTA_TNFR2_PATHWAY      |

|              |                 |                                                |
|--------------|-----------------|------------------------------------------------|
| 17:43390763  | <i>CRHR1_2</i>  | BIOCARTA_TOLL_PATHWAY                          |
| 17:40392358  | <i>RETREG3</i>  | BIOCARTA_TPO_PATHWAY                           |
| 6:112009427  | <i>FYN</i>      | BIOCARTA_TSP1_PATHWAY                          |
| 6:112056759  | <i>FYN</i>      | BIOCARTA_TSP1_PATHWAY                          |
| 6:112151452  | <i>FYN</i>      | BIOCARTA_TSP1_PATHWAY                          |
| 3:49406095   | <i>IP6K2</i>    | BIOCARTA_UCALPAIN_PATHWAY                      |
| 3:49424231   | <i>IP6K2</i>    | BIOCARTA_UCALPAIN_PATHWAY                      |
| 3:49450137   | <i>IP6K2</i>    | BIOCARTA_UCALPAIN_PATHWAY                      |
| 3:48835245   | <i>IP6K2</i>    | BIOCARTA_VIP_PATHWAY                           |
| 10:103185542 | <i>GBF1</i>     | BIOCARTA_WNT_PATHWAY                           |
| 10:103308244 | <i>GBF1</i>     | BIOCARTA_WNT_PATHWAY                           |
| 6:32789400   | <i>HLA-DRB5</i> | KEGG_ABC_TRANSPORTERS                          |
| 6:32791831   | <i>HLA-DRB5</i> | KEGG_ABC_TRANSPORTERS                          |
| 6:32797361   | <i>HLA-DRB5</i> | KEGG_ABC_TRANSPORTERS                          |
| 6:32802462   | <i>HLA-DRB5</i> | KEGG_ABC_TRANSPORTERS                          |
| 6:32814942   | <i>HLA-DRB5</i> | KEGG_ABC_TRANSPORTERS                          |
| 12:39960237  | <i>LRRK2_2</i>  | KEGG_ABC_TRANSPORTERS                          |
| 12:123453034 | <i>HIP1R</i>    | KEGG_ABC_TRANSPORTERS                          |
| 17:39883520  | <i>RETREG3</i>  | KEGG_ACUTE_MYELOID_LEUKEMIA                    |
| 17:40392358  | <i>RETREG3</i>  | KEGG_ACUTE_MYELOID_LEUKEMIA                    |
| 3:49406095   | <i>IP6K2</i>    | KEGG_ADHERENS_JUNCTION                         |
| 3:49424231   | <i>IP6K2</i>    | KEGG_ADHERENS_JUNCTION                         |
| 3:49450137   | <i>IP6K2</i>    | KEGG_ADHERENS_JUNCTION                         |
| 6:112009427  | <i>FYN</i>      | KEGG_ADHERENS_JUNCTION                         |
| 6:112056759  | <i>FYN</i>      | KEGG_ADHERENS_JUNCTION                         |
| 6:112151452  | <i>FYN</i>      | KEGG_ADHERENS_JUNCTION                         |
| 17:41056283  | <i>RETREG3</i>  | KEGG_ADIPOCYTOKINE_SIGNALING_PATHWAY           |
| 17:7560294   | <i>V1NB1</i>    | KEGG_ALDOSTERONE_REGULATED_SODIUM_REABSORPTION |
| 6:29798642   | <i>TRIM40</i>   | KEGG_ALLOGRAFT_REJECTION                       |
| 6:32602372   | <i>HLA-DRB5</i> | KEGG_ALLOGRAFT_REJECTION                       |
| 6:32930679   | <i>HLA-DRB5</i> | KEGG_ALLOGRAFT_REJECTION                       |
| 6:32934409   | <i>HLA-DRB5</i> | KEGG_ALLOGRAFT_REJECTION                       |
| 6:32973303   | <i>HLA-DRB5</i> | KEGG_ALLOGRAFT_REJECTION                       |
| 6:32974268   | <i>HLA-DRB5</i> | KEGG_ALLOGRAFT_REJECTION                       |
| 1:161171736  | <i>FCGR2A</i>   | KEGG_ALZHEIMERS_DISEASE                        |
| 1:161875645  | <i>FCGR2A</i>   | KEGG_ALZHEIMERS_DISEASE                        |
| 1:161930954  | <i>FCGR2A</i>   | KEGG_ALZHEIMERS_DISEASE                        |
| 1:227067656  | <i>ITPKB</i>    | KEGG_ALZHEIMERS_DISEASE                        |
| 4:90677243   | <i>SNCA_2</i>   | KEGG_ALZHEIMERS_DISEASE                        |
| 4:90700329   | <i>SNCA_2</i>   | KEGG_ALZHEIMERS_DISEASE                        |
| 4:90727315   | <i>SNCA_2</i>   | KEGG_ALZHEIMERS_DISEASE                        |
| 4:90738839   | <i>SNCA_2</i>   | KEGG_ALZHEIMERS_DISEASE                        |
| 4:90757294   | <i>SNCA_2</i>   | KEGG_ALZHEIMERS_DISEASE                        |
| 17:43999203  | <i>WNT3</i>     | KEGG_ALZHEIMERS_DISEASE                        |
| 17:44005297  | <i>WNT3</i>     | KEGG_ALZHEIMERS_DISEASE                        |
| 17:44019712  | <i>WNT3</i>     | KEGG_ALZHEIMERS_DISEASE                        |
| 17:44060492  | <i>WNT3</i>     | KEGG_ALZHEIMERS_DISEASE                        |
| 17:44065263  | <i>WNT3</i>     | KEGG_ALZHEIMERS_DISEASE                        |
| 17:44081178  | <i>WNT3</i>     | KEGG_ALZHEIMERS_DISEASE                        |
| 17:44083297  | <i>WNT3</i>     | KEGG_ALZHEIMERS_DISEASE                        |
| 6:31758240   | <i>HLA-DRB5</i> | KEGG_AMINOACYL_TRNA_BIOSYNTHESIS               |
| 6:31762311   | <i>HLA-DRB5</i> | KEGG_AMINOACYL_TRNA_BIOSYNTHESIS               |
| 17:7578671   | <i>V1NB1</i>    | KEGG_AMYOTROPHIC_LATERAL_SCLEROSIS_ALS         |

|              |                 |                                                           |
|--------------|-----------------|-----------------------------------------------------------|
| 6:29798642   | <i>TRIM40</i>   | KEGG_ANTIGEN_PROCESSING_AND_PRESENTATION                  |
| 6:32602372   | <i>HLA-DRB5</i> | KEGG_ANTIGEN_PROCESSING_AND_PRESENTATION                  |
| 6:32789400   | <i>HLA-DRB5</i> | KEGG_ANTIGEN_PROCESSING_AND_PRESENTATION                  |
| 6:32791831   | <i>HLA-DRB5</i> | KEGG_ANTIGEN_PROCESSING_AND_PRESENTATION                  |
| 6:32797361   | <i>HLA-DRB5</i> | KEGG_ANTIGEN_PROCESSING_AND_PRESENTATION                  |
| 6:32802462   | <i>HLA-DRB5</i> | KEGG_ANTIGEN_PROCESSING_AND_PRESENTATION                  |
| 6:32814942   | <i>HLA-DRB5</i> | KEGG_ANTIGEN_PROCESSING_AND_PRESENTATION                  |
| 6:32930679   | <i>HLA-DRB5</i> | KEGG_ANTIGEN_PROCESSING_AND_PRESENTATION                  |
| 6:32934409   | <i>HLA-DRB5</i> | KEGG_ANTIGEN_PROCESSING_AND_PRESENTATION                  |
| 6:32973303   | <i>HLA-DRB5</i> | KEGG_ANTIGEN_PROCESSING_AND_PRESENTATION                  |
| 6:32974268   | <i>HLA-DRB5</i> | KEGG_ANTIGEN_PROCESSING_AND_PRESENTATION                  |
| 8:11712443   | <i>CTSB</i>     | KEGG_ANTIGEN_PROCESSING_AND_PRESENTATION                  |
| 3:48835245   | <i>IP6K2</i>    | KEGG_APOPTOSIS                                            |
| 8:23050400   | <i>BIN3</i>     | KEGG_APOPTOSIS                                            |
| 17:7578671   | <i>V1NB1</i>    | KEGG_APOPTOSIS                                            |
| 17:43390763  | <i>CRHR1_2</i>  | KEGG_APOPTOSIS                                            |
| 17:7983799   | <i>V1NB1</i>    | KEGG_ARACHIDONIC_ACID_METABOLISM                          |
| 1:226108200  | <i>ITPKB</i>    | KEGG_ARGININE_AND_PROLINE_METABOLISM                      |
| 1:156059276  | <i>GBAP1</i>    | KEGG_ARRHYTHMOGENIC_RIGHT_VENTRICULAR_CARDIOMYOPATHY_ARVC |
| 3:49561208   | <i>IP6K2</i>    | KEGG_ARRHYTHMOGENIC_RIGHT_VENTRICULAR_CARDIOMYOPATHY_ARVC |
| 10:15569598  | <i>ITGA8</i>    | KEGG_ARRHYTHMOGENIC_RIGHT_VENTRICULAR_CARDIOMYOPATHY_ARVC |
| 10:15652368  | <i>ITGA8</i>    | KEGG_ARRHYTHMOGENIC_RIGHT_VENTRICULAR_CARDIOMYOPATHY_ARVC |
| 17:39883520  | <i>RETREG3</i>  | KEGG_ARRHYTHMOGENIC_RIGHT_VENTRICULAR_CARDIOMYOPATHY_ARVC |
| 6:32602372   | <i>HLA-DRB5</i> | KEGG_ASTHMA                                               |
| 6:32930679   | <i>HLA-DRB5</i> | KEGG_ASTHMA                                               |
| 6:32934409   | <i>HLA-DRB5</i> | KEGG_ASTHMA                                               |
| 6:32973303   | <i>HLA-DRB5</i> | KEGG_ASTHMA                                               |
| 6:32974268   | <i>HLA-DRB5</i> | KEGG_ASTHMA                                               |
| 6:29798642   | <i>TRIM40</i>   | KEGG_AUTOIMMUNE_THYROID_DISEASE                           |
| 6:32602372   | <i>HLA-DRB5</i> | KEGG_AUTOIMMUNE_THYROID_DISEASE                           |
| 6:32930679   | <i>HLA-DRB5</i> | KEGG_AUTOIMMUNE_THYROID_DISEASE                           |
| 6:32934409   | <i>HLA-DRB5</i> | KEGG_AUTOIMMUNE_THYROID_DISEASE                           |
| 6:32973303   | <i>HLA-DRB5</i> | KEGG_AUTOIMMUNE_THYROID_DISEASE                           |
| 6:32974268   | <i>HLA-DRB5</i> | KEGG_AUTOIMMUNE_THYROID_DISEASE                           |
| 3:49406095   | <i>IP6K2</i>    | KEGG_AXON_GUIDANCE                                        |
| 3:49424231   | <i>IP6K2</i>    | KEGG_AXON_GUIDANCE                                        |
| 3:49450137   | <i>IP6K2</i>    | KEGG_AXON_GUIDANCE                                        |
| 3:122645304  | <i>KPNA1</i>    | KEGG_AXON_GUIDANCE                                        |
| 6:112009427  | <i>FYN</i>      | KEGG_AXON_GUIDANCE                                        |
| 6:112056759  | <i>FYN</i>      | KEGG_AXON_GUIDANCE                                        |
| 6:112151452  | <i>FYN</i>      | KEGG_AXON_GUIDANCE                                        |
| 10:104285824 | <i>GBF1</i>     | KEGG_BASAL_CELL_CARCINOMA                                 |
| 17:7129974   | <i>V1NB1</i>    | KEGG_BASAL_CELL_CARCINOMA                                 |
| 17:7578671   | <i>V1NB1</i>    | KEGG_BASAL_CELL_CARCINOMA                                 |
| 17:44843651  | <i>WNT3</i>     | KEGG_BASAL_CELL_CARCINOMA                                 |
| 17:44888209  | <i>WNT3</i>     | KEGG_BASAL_CELL_CARCINOMA                                 |
| 17:44888715  | <i>WNT3</i>     | KEGG_BASAL_CELL_CARCINOMA                                 |
| 17:44906949  | <i>WNT3</i>     | KEGG_BASAL_CELL_CARCINOMA                                 |
| 17:44912901  | <i>WNT3</i>     | KEGG_BASAL_CELL_CARCINOMA                                 |
| 17:44931399  | <i>WNT3</i>     | KEGG_BASAL_CELL_CARCINOMA                                 |
| 17:44947756  | <i>WNT3</i>     | KEGG_BASAL_CELL_CARCINOMA                                 |
| 14:55902186  | <i>GCH1</i>     | KEGG_BASAL_TRANSCRIPTION_FACTORS                          |
| 12:133206648 | <i>FBRSL1</i>   | KEGG_BASE_EXCISION_REPAIR                                 |

|              |                 |                                   |
|--------------|-----------------|-----------------------------------|
| 12:133223685 | <i>FBRSL1</i>   | KEGG_BASE_EXCISION_REPAIR         |
| 12:133225045 | <i>FBRSL1</i>   | KEGG_BASE_EXCISION_REPAIR         |
| 17:7578671   | <i>V1NB1</i>    | KEGG_BLADDER_CANCER               |
| 1:226910340  | <i>ITPKB</i>    | KEGG_CALCIUM_SIGNALING_PATHWAY    |
| 1:226916078  | <i>ITPKB</i>    | KEGG_CALCIUM_SIGNALING_PATHWAY    |
| 4:15709252   | <i>BST1</i>     | KEGG_CALCIUM_SIGNALING_PATHWAY    |
| 4:15713608   | <i>BST1</i>     | KEGG_CALCIUM_SIGNALING_PATHWAY    |
| 4:15724372   | <i>BST1</i>     | KEGG_CALCIUM_SIGNALING_PATHWAY    |
| 4:15737882   | <i>BST1</i>     | KEGG_CALCIUM_SIGNALING_PATHWAY    |
| 4:15789288   | <i>BST1</i>     | KEGG_CALCIUM_SIGNALING_PATHWAY    |
| 4:15816670   | <i>BST1</i>     | KEGG_CALCIUM_SIGNALING_PATHWAY    |
| 4:15829612   | <i>BST1</i>     | KEGG_CALCIUM_SIGNALING_PATHWAY    |
| 4:114424939  | <i>CAMK2D</i>   | KEGG_CALCIUM_SIGNALING_PATHWAY    |
| 17:43195981  | <i>CRHR1_2</i>  | KEGG_CALCIUM_SIGNALING_PATHWAY    |
| 19:3156505   | <i>SPPL2B</i>   | KEGG_CALCIUM_SIGNALING_PATHWAY    |
| 17:7560294   | <i>V1NB1</i>    | KEGG_CARDIAC_MUSCLE_CONTRACTION   |
| 6:29798642   | <i>TRIM40</i>   | KEGG_CELL_ADHESION_MOLECULES_CAMS |
| 6:32602372   | <i>HLA-DRB5</i> | KEGG_CELL_ADHESION_MOLECULES_CAMS |
| 6:32930679   | <i>HLA-DRB5</i> | KEGG_CELL_ADHESION_MOLECULES_CAMS |
| 6:32934409   | <i>HLA-DRB5</i> | KEGG_CELL_ADHESION_MOLECULES_CAMS |
| 6:32973303   | <i>HLA-DRB5</i> | KEGG_CELL_ADHESION_MOLECULES_CAMS |
| 6:32974268   | <i>HLA-DRB5</i> | KEGG_CELL_ADHESION_MOLECULES_CAMS |
| 10:15569598  | <i>ITGA8</i>    | KEGG_CELL_ADHESION_MOLECULES_CAMS |
| 10:15652368  | <i>ITGA8</i>    | KEGG_CELL_ADHESION_MOLECULES_CAMS |
| 11:133947732 | <i>IGSF9B</i>   | KEGG_CELL_ADHESION_MOLECULES_CAMS |
| 12:41147295  | <i>LRRK2_2</i>  | KEGG_CELL_ADHESION_MOLECULES_CAMS |
| 12:41251554  | <i>LRRK2_2</i>  | KEGG_CELL_ADHESION_MOLECULES_CAMS |
| 12:41407403  | <i>LRRK2_2</i>  | KEGG_CELL_ADHESION_MOLECULES_CAMS |
| 16:30510571  | <i>SETD1A</i>   | KEGG_CELL_ADHESION_MOLECULES_CAMS |
| 16:30516492  | <i>SETD1A</i>   | KEGG_CELL_ADHESION_MOLECULES_CAMS |
| 16:30520856  | <i>SETD1A</i>   | KEGG_CELL_ADHESION_MOLECULES_CAMS |
| 3:48199695   | <i>IP6K2</i>    | KEGG_CELL_CYCLE                   |
| 3:48214438   | <i>IP6K2</i>    | KEGG_CELL_CYCLE                   |
| 17:7578671   | <i>V1NB1</i>    | KEGG_CELL_CYCLE                   |
| 17:45215865  | <i>WNT3</i>     | KEGG_CELL_CYCLE                   |
| 17:45244822  | <i>WNT3</i>     | KEGG_CELL_CYCLE                   |
| 3:49406095   | <i>IP6K2</i>    | KEGG_CHEMOKINE_SIGNALING_PATHWAY  |
| 3:49424231   | <i>IP6K2</i>    | KEGG_CHEMOKINE_SIGNALING_PATHWAY  |
| 3:49450137   | <i>IP6K2</i>    | KEGG_CHEMOKINE_SIGNALING_PATHWAY  |
| 3:123057397  | <i>KPNA1</i>    | KEGG_CHEMOKINE_SIGNALING_PATHWAY  |
| 10:121114292 | <i>INPP5F</i>   | KEGG_CHEMOKINE_SIGNALING_PATHWAY  |
| 10:121138071 | <i>INPP5F</i>   | KEGG_CHEMOKINE_SIGNALING_PATHWAY  |
| 10:121191186 | <i>INPP5F</i>   | KEGG_CHEMOKINE_SIGNALING_PATHWAY  |
| 17:40392358  | <i>RETREG3</i>  | KEGG_CHEMOKINE_SIGNALING_PATHWAY  |
| 17:7578671   | <i>V1NB1</i>    | KEGG_CHRONIC_MYELOID_LEUKEMIA     |
| 17:40392358  | <i>RETREG3</i>  | KEGG_CHRONIC_MYELOID_LEUKEMIA     |
| 2:101439596  | <i>MAP4K4</i>   | KEGG_CIRCADIAN_RHYTHM_MAMMAL      |
| 2:101550181  | <i>MAP4K4</i>   | KEGG_CIRCADIAN_RHYTHM_MAMMAL      |
| 2:101603812  | <i>MAP4K4</i>   | KEGG_CIRCADIAN_RHYTHM_MAMMAL      |
| 3:49406095   | <i>IP6K2</i>    | KEGG_COLORECTAL_CANCER            |
| 3:49424231   | <i>IP6K2</i>    | KEGG_COLORECTAL_CANCER            |
| 3:49450137   | <i>IP6K2</i>    | KEGG_COLORECTAL_CANCER            |
| 17:7578671   | <i>V1NB1</i>    | KEGG_COLORECTAL_CANCER            |

|              |                     |                                                                 |
|--------------|---------------------|-----------------------------------------------------------------|
| 6:31897219   | <i>HLA-DRB5</i>     | KEGG_COMPLEMENT_AND_COAGULATION_CASCADES                        |
| 2:102609356  | <i>MAP4K4</i>       | KEGG_CYTOKINE_CYTOKINE_RECEPTOR_INTERACTION                     |
| 2:102636759  | <i>MAP4K4</i>       | KEGG_CYTOKINE_CYTOKINE_RECEPTOR_INTERACTION                     |
| 2:103063855  | <i>MAP4K4</i>       | KEGG_CYTOKINE_CYTOKINE_RECEPTOR_INTERACTION                     |
| 8:23050400   | <i>BIN3</i>         | KEGG_CYTOKINE_CYTOKINE_RECEPTOR_INTERACTION                     |
| 19:2251817   | <i>SPPL2B</i>       | KEGG_CYTOKINE_CYTOKINE_RECEPTOR_INTERACTION                     |
| 1:156059276  | <i>GBAP1</i>        | KEGG_DILATED_CARDIOMYOPATHY                                     |
| 3:49561208   | <i>IP6K2</i>        | KEGG_DILATED_CARDIOMYOPATHY                                     |
| 3:123057397  | <i>KPNA1</i>        | KEGG_DILATED_CARDIOMYOPATHY                                     |
| 10:15569598  | <i>ITGA8</i>        | KEGG_DILATED_CARDIOMYOPATHY                                     |
| 10:15652368  | <i>ITGA8</i>        | KEGG_DILATED_CARDIOMYOPATHY                                     |
| 12:133206648 | <i>FBRSL1</i>       | KEGG_DNA_REPLICATION                                            |
| 12:133223685 | <i>FBRSL1</i>       | KEGG_DNA_REPLICATION                                            |
| 12:133225045 | <i>FBRSL1</i>       | KEGG_DNA_REPLICATION                                            |
| 6:32186193   | <i>HLA-DRB5</i>     | KEGG_DORSO_VENTRAL_AXIS_FORMATION                               |
| 7:65425894   | <i>GS1-124K5.11</i> | KEGG_DRUG_METABOLISM_OTHER_ENZYMES                              |
| 17:76177567  | <i>DNAH17</i>       | KEGG_DRUG_METABOLISM_OTHER_ENZYMES                              |
| 3:49162284   | <i>IP6K2</i>        | KEGG_ECM_RECEPTOR_INTERACTION                                   |
| 3:49162583   | <i>IP6K2</i>        | KEGG_ECM_RECEPTOR_INTERACTION                                   |
| 3:49561208   | <i>IP6K2</i>        | KEGG_ECM_RECEPTOR_INTERACTION                                   |
| 6:32031904   | <i>HLA-DRB5</i>     | KEGG_ECM_RECEPTOR_INTERACTION                                   |
| 6:32062687   | <i>HLA-DRB5</i>     | KEGG_ECM_RECEPTOR_INTERACTION                                   |
| 6:33153528   | <i>HLA-DRB5</i>     | KEGG_ECM_RECEPTOR_INTERACTION                                   |
| 6:112561154  | <i>FYN</i>          | KEGG_ECM_RECEPTOR_INTERACTION                                   |
| 10:15569598  | <i>ITGA8</i>        | KEGG_ECM_RECEPTOR_INTERACTION                                   |
| 10:15652368  | <i>ITGA8</i>        | KEGG_ECM_RECEPTOR_INTERACTION                                   |
| 1:171945488  | <i>VAMP4</i>        | KEGG_ENDOCYTOSIS                                                |
| 1:172137119  | <i>VAMP4</i>        | KEGG_ENDOCYTOSIS                                                |
| 1:172386261  | <i>VAMP4</i>        | KEGG_ENDOCYTOSIS                                                |
| 6:29798642   | <i>TRIM40</i>       | KEGG_ENDOCYTOSIS                                                |
| 8:17125768   | <i>FGF20</i>        | KEGG_ENDOCYTOSIS                                                |
| 8:131153067  | <i>FAM49B</i>       | KEGG_ENDOCYTOSIS                                                |
| 8:131190319  | <i>FAM49B</i>       | KEGG_ENDOCYTOSIS                                                |
| 8:131427864  | <i>FAM49B</i>       | KEGG_ENDOCYTOSIS                                                |
| 9:17579690   | <i>SH3GL2_2</i>     | KEGG_ENDOCYTOSIS                                                |
| 9:17609302   | <i>SH3GL2_2</i>     | KEGG_ENDOCYTOSIS                                                |
| 9:17627444   | <i>SH3GL2_2</i>     | KEGG_ENDOCYTOSIS                                                |
| 9:17710876   | <i>SH3GL2_2</i>     | KEGG_ENDOCYTOSIS                                                |
| 9:17732590   | <i>SH3GL2_2</i>     | KEGG_ENDOCYTOSIS                                                |
| 9:17737514   | <i>SH3GL2_2</i>     | KEGG_ENDOCYTOSIS                                                |
| 9:17758945   | <i>SH3GL2_2</i>     | KEGG_ENDOCYTOSIS                                                |
| 10:121114292 | <i>INPP5F</i>       | KEGG_ENDOCYTOSIS                                                |
| 10:121138071 | <i>INPP5F</i>       | KEGG_ENDOCYTOSIS                                                |
| 10:121191186 | <i>INPP5F</i>       | KEGG_ENDOCYTOSIS                                                |
| 17:7578671   | <i>V1NB1</i>        | KEGG_ENDOMETRIAL_CANCER                                         |
| 11:133947732 | <i>IGSF9B</i>       | KEGG_EPITHELIAL_CELL_SIGNALING_IN_HELICOBACTER_PYLORI_INFECTION |
| 12:124219791 | <i>HIP1R</i>        | KEGG_EPITHELIAL_CELL_SIGNALING_IN_HELICOBACTER_PYLORI_INFECTION |
| 17:43390763  | <i>CRHR1_2</i>      | KEGG_EPITHELIAL_CELL_SIGNALING_IN_HELICOBACTER_PYLORI_INFECTION |
| 4:114424939  | <i>CAMK2D</i>       | KEGG_ERBB_SIGNALING_PATHWAY                                     |
| 17:40392358  | <i>RETREG3</i>      | KEGG_ERBB_SIGNALING_PATHWAY                                     |
| 6:112009427  | <i>FYN</i>          | KEGG_FC_EPSILON_RI_SIGNALING_PATHWAY                            |
| 6:112056759  | <i>FYN</i>          | KEGG_FC_EPSILON_RI_SIGNALING_PATHWAY                            |
| 6:112151452  | <i>FYN</i>          | KEGG_FC_EPSILON_RI_SIGNALING_PATHWAY                            |

|              |              |                                                               |
|--------------|--------------|---------------------------------------------------------------|
| 1:171945488  | VAMP4        | KEGG_FC_GAMMA_R_MEDIATED_PHAGOCYTOSIS                         |
| 1:172137119  | VAMP4        | KEGG_FC_GAMMA_R_MEDIATED_PHAGOCYTOSIS                         |
| 1:172386261  | VAMP4        | KEGG_FC_GAMMA_R_MEDIATED_PHAGOCYTOSIS                         |
| 8:131153067  | FAM49B       | KEGG_FC_GAMMA_R_MEDIATED_PHAGOCYTOSIS                         |
| 8:131190319  | FAM49B       | KEGG_FC_GAMMA_R_MEDIATED_PHAGOCYTOSIS                         |
| 8:131427864  | FAM49B       | KEGG_FC_GAMMA_R_MEDIATED_PHAGOCYTOSIS                         |
| 3:49162284   | IP6K2        | KEGG_FOCAL_ADHESION                                           |
| 3:49162583   | IP6K2        | KEGG_FOCAL_ADHESION                                           |
| 3:49406095   | IP6K2        | KEGG_FOCAL_ADHESION                                           |
| 3:49424231   | IP6K2        | KEGG_FOCAL_ADHESION                                           |
| 3:49450137   | IP6K2        | KEGG_FOCAL_ADHESION                                           |
| 6:32031904   | HLA-DRB5     | KEGG_FOCAL_ADHESION                                           |
| 6:32062687   | HLA-DRB5     | KEGG_FOCAL_ADHESION                                           |
| 6:33153528   | HLA-DRB5     | KEGG_FOCAL_ADHESION                                           |
| 6:112009427  | FYN          | KEGG_FOCAL_ADHESION                                           |
| 6:112056759  | FYN          | KEGG_FOCAL_ADHESION                                           |
| 6:112151452  | FYN          | KEGG_FOCAL_ADHESION                                           |
| 6:112561154  | FYN          | KEGG_FOCAL_ADHESION                                           |
| 10:15569598  | ITGA8        | KEGG_FOCAL_ADHESION                                           |
| 10:15652368  | ITGA8        | KEGG_FOCAL_ADHESION                                           |
| 15:62817568  | VPS13C       | KEGG_FOCAL_ADHESION                                           |
| 14:55348869  | GCH1         | KEGG_FOLATE_BIOSYNTHESIS                                      |
| 17:41056283  | RETREG3      | KEGG_GALACTOSE_METABOLISM                                     |
| 3:123057397  | KPNA1        | KEGG_GAP_JUNCTION                                             |
| 4:114424939  | CAMK2D       | KEGG_GLIOMA                                                   |
| 17:7578671   | V1NB1        | KEGG_GLIOMA                                                   |
| 20:6011934   | CRLS1        | KEGG_GLYCEROPHOSPHOLIPID_METABOLISM                           |
| 17:41056283  | RETREG3      | KEGG_GLYCOLYSIS_GLUONEOGENESIS                                |
| 6:71594785   | RIMS1        | KEGG_GLYCOSAMINOGLYCAN_BIOSYNTHESIS_CHONDROITIN_SULFATE       |
| 6:71594785   | RIMS1        | KEGG_GLYCOSAMINOGLYCAN_BIOSYNTHESIS_HEPARAN_SULFATE           |
| 7:65425894   | GS1-124K5.11 | KEGG_GLYCOSAMINOGLYCAN_DEGRADATION                            |
| 6:33252561   | HLA-DRB5     | KEGG_GLYCOSPHINGOLIPID_BIOSYNTHESIS_GANGLIO_SERIES            |
| 3:160817877  | SPTSSB       | KEGG_GLYCOSPHINGOLIPID_BIOSYNTHESIS_GLOBO_SERIES              |
| 3:182976382  | MCCC1        | KEGG_GLYCOSPHINGOLIPID_BIOSYNTHESIS_LACTO_AND_NEOLACTO_SERIES |
| 3:182979912  | MCCC1        | KEGG_GLYCOSPHINGOLIPID_BIOSYNTHESIS_LACTO_AND_NEOLACTO_SERIES |
| 3:183005320  | MCCC1        | KEGG_GLYCOSPHINGOLIPID_BIOSYNTHESIS_LACTO_AND_NEOLACTO_SERIES |
| 1:172386261  | VAMP4        | KEGG_GLYCOSYLPHOSPHATIDYLINOSITOL_GPI_ANCHOR_BIOSYNTHESIS     |
| 1:172388441  | VAMP4        | KEGG_GLYCOSYLPHOSPHATIDYLINOSITOL_GPI_ANCHOR_BIOSYNTHESIS     |
| 1:172389198  | VAMP4        | KEGG_GLYCOSYLPHOSPHATIDYLINOSITOL_GPI_ANCHOR_BIOSYNTHESIS     |
| 3:123057397  | KPNA1        | KEGG_GNRH_SIGNALING_PATHWAY                                   |
| 4:114424939  | CAMK2D       | KEGG_GNRH_SIGNALING_PATHWAY                                   |
| 6:29798642   | TRIM40       | KEGG_GRAFT_VERSUS_HOST_DISEASE                                |
| 6:32602372   | HLA-DRB5     | KEGG_GRAFT_VERSUS_HOST_DISEASE                                |
| 6:32930679   | HLA-DRB5     | KEGG_GRAFT_VERSUS_HOST_DISEASE                                |
| 6:32934409   | HLA-DRB5     | KEGG_GRAFT_VERSUS_HOST_DISEASE                                |
| 6:32973303   | HLA-DRB5     | KEGG_GRAFT_VERSUS_HOST_DISEASE                                |
| 6:32974268   | HLA-DRB5     | KEGG_GRAFT_VERSUS_HOST_DISEASE                                |
| 2:169999639  | STK39        | KEGG_HEDGEHOG_SIGNALING_PATHWAY                               |
| 2:170028024  | STK39        | KEGG_HEDGEHOG_SIGNALING_PATHWAY                               |
| 10:103185542 | GBF1         | KEGG_HEDGEHOG_SIGNALING_PATHWAY                               |
| 10:103308244 | GBF1         | KEGG_HEDGEHOG_SIGNALING_PATHWAY                               |
| 10:104285824 | GBF1         | KEGG_HEDGEHOG_SIGNALING_PATHWAY                               |
| 17:44843651  | WNT3         | KEGG_HEDGEHOG_SIGNALING_PATHWAY                               |

|              |                 |                                                   |
|--------------|-----------------|---------------------------------------------------|
| 17:44888209  | <i>WNT3</i>     | KEGG_HEDGEHOG_SIGNALING_PATHWAY                   |
| 17:44888715  | <i>WNT3</i>     | KEGG_HEDGEHOG_SIGNALING_PATHWAY                   |
| 17:44906949  | <i>WNT3</i>     | KEGG_HEDGEHOG_SIGNALING_PATHWAY                   |
| 17:44912901  | <i>WNT3</i>     | KEGG_HEDGEHOG_SIGNALING_PATHWAY                   |
| 17:44931399  | <i>WNT3</i>     | KEGG_HEDGEHOG_SIGNALING_PATHWAY                   |
| 17:44947756  | <i>WNT3</i>     | KEGG_HEDGEHOG_SIGNALING_PATHWAY                   |
| 2:102609356  | <i>MAP4K4</i>   | KEGG_HEMATOPOIETIC_CELL_LINEAGE                   |
| 2:102636759  | <i>MAP4K4</i>   | KEGG_HEMATOPOIETIC_CELL_LINEAGE                   |
| 4:15789288   | <i>BST1</i>     | KEGG_HEMATOPOIETIC_CELL_LINEAGE                   |
| 4:15816670   | <i>BST1</i>     | KEGG_HEMATOPOIETIC_CELL_LINEAGE                   |
| 4:15829612   | <i>BST1</i>     | KEGG_HEMATOPOIETIC_CELL_LINEAGE                   |
| 1:161171736  | <i>FCGR2A</i>   | KEGG_HUNTINGTONS_DISEASE                          |
| 14:55902186  | <i>GCH1</i>     | KEGG_HUNTINGTONS_DISEASE                          |
| 17:7101771   | <i>V1NB1</i>    | KEGG_HUNTINGTONS_DISEASE                          |
| 17:7578671   | <i>V1NB1</i>    | KEGG_HUNTINGTONS_DISEASE                          |
| 17:7631694   | <i>V1NB1</i>    | KEGG_HUNTINGTONS_DISEASE                          |
| 17:7682605   | <i>V1NB1</i>    | KEGG_HUNTINGTONS_DISEASE                          |
| 17:39883520  | <i>RETREG3</i>  | KEGG_HUNTINGTONS_DISEASE                          |
| 1:156059276  | <i>GBAP1</i>    | KEGG_HYPERTROPHIC_CARDIOMYOPATHY_HCM              |
| 3:49561208   | <i>IP6K2</i>    | KEGG_HYPERTROPHIC_CARDIOMYOPATHY_HCM              |
| 10:15569598  | <i>ITGA8</i>    | KEGG_HYPERTROPHIC_CARDIOMYOPATHY_HCM              |
| 10:15652368  | <i>ITGA8</i>    | KEGG_HYPERTROPHIC_CARDIOMYOPATHY_HCM              |
| 1:226910340  | <i>ITPKB</i>    | KEGG_INOSITOL_PHOSPHATE_METABOLISM                |
| 1:226916078  | <i>ITPKB</i>    | KEGG_INOSITOL_PHOSPHATE_METABOLISM                |
| 17:43195981  | <i>CRHR1_2</i>  | KEGG_INOSITOL_PHOSPHATE_METABOLISM                |
| 3:48835245   | <i>IP6K2</i>    | KEGG_INSULIN_SIGNALING_PATHWAY                    |
| 14:55515304  | <i>GCH1</i>     | KEGG_INSULIN_SIGNALING_PATHWAY                    |
| 17:41056283  | <i>RETREG3</i>  | KEGG_INSULIN_SIGNALING_PATHWAY                    |
| 6:32602372   | <i>HLA-DRB5</i> | KEGG_INTESTINAL_IMMUNE_NETWORK_FOR_IGA_PRODUCTION |
| 6:32930679   | <i>HLA-DRB5</i> | KEGG_INTESTINAL_IMMUNE_NETWORK_FOR_IGA_PRODUCTION |
| 6:32934409   | <i>HLA-DRB5</i> | KEGG_INTESTINAL_IMMUNE_NETWORK_FOR_IGA_PRODUCTION |
| 6:32973303   | <i>HLA-DRB5</i> | KEGG_INTESTINAL_IMMUNE_NETWORK_FOR_IGA_PRODUCTION |
| 6:32974268   | <i>HLA-DRB5</i> | KEGG_INTESTINAL_IMMUNE_NETWORK_FOR_IGA_PRODUCTION |
| 17:43390763  | <i>CRHR1_2</i>  | KEGG_INTESTINAL_IMMUNE_NETWORK_FOR_IGA_PRODUCTION |
| 14:55515304  | <i>GCH1</i>     | KEGG_JAK_STAT_SIGNALING_PATHWAY                   |
| 17:40392358  | <i>RETREG3</i>  | KEGG_JAK_STAT_SIGNALING_PATHWAY                   |
| 6:32602372   | <i>HLA-DRB5</i> | KEGG_LEISHMANIA_INFECTION                         |
| 6:32930679   | <i>HLA-DRB5</i> | KEGG_LEISHMANIA_INFECTION                         |
| 6:32934409   | <i>HLA-DRB5</i> | KEGG_LEISHMANIA_INFECTION                         |
| 6:32973303   | <i>HLA-DRB5</i> | KEGG_LEISHMANIA_INFECTION                         |
| 6:32974268   | <i>HLA-DRB5</i> | KEGG_LEISHMANIA_INFECTION                         |
| 3:49406095   | <i>IP6K2</i>    | KEGG_LEUKOCYTE_TRANSENDOTHELIAL_MIGRATION         |
| 3:49424231   | <i>IP6K2</i>    | KEGG_LEUKOCYTE_TRANSENDOTHELIAL_MIGRATION         |
| 3:49450137   | <i>IP6K2</i>    | KEGG_LEUKOCYTE_TRANSENDOTHELIAL_MIGRATION         |
| 11:133947732 | <i>IGSF9B</i>   | KEGG_LEUKOCYTE_TRANSENDOTHELIAL_MIGRATION         |
| 16:30510571  | <i>SETD1A</i>   | KEGG_LEUKOCYTE_TRANSENDOTHELIAL_MIGRATION         |
| 16:30516492  | <i>SETD1A</i>   | KEGG_LEUKOCYTE_TRANSENDOTHELIAL_MIGRATION         |
| 16:30520856  | <i>SETD1A</i>   | KEGG_LEUKOCYTE_TRANSENDOTHELIAL_MIGRATION         |
| 17:43744203  | <i>CRHR1_2</i>  | KEGG_LONG_TERM_DEPRESSION                         |
| 17:43748712  | <i>CRHR1_2</i>  | KEGG_LONG_TERM_DEPRESSION                         |
| 17:43767804  | <i>CRHR1_2</i>  | KEGG_LONG_TERM_DEPRESSION                         |
| 17:43784228  | <i>CRHR1_2</i>  | KEGG_LONG_TERM_DEPRESSION                         |
| 17:43791502  | <i>CRHR1_2</i>  | KEGG_LONG_TERM_DEPRESSION                         |

|              |                     |                                                |
|--------------|---------------------|------------------------------------------------|
| 17:43843861  | <i>CRHR1_2</i>      | KEGG_LONG_TERM_DEPRESSION                      |
| 17:43847503  | <i>CRHR1_2</i>      | KEGG_LONG_TERM_DEPRESSION                      |
| 4:114424939  | <i>CAMK2D</i>       | KEGG_LONG_TERM_POTENTIATION                    |
| 1:155359992  | <i>GBAP1</i>        | KEGG_LYSINE_DEGRADATION                        |
| 6:31862876   | <i>HLA-DRB5</i>     | KEGG_LYSINE_DEGRADATION                        |
| 19:2172266   | <i>SPPL2B</i>       | KEGG_LYSINE_DEGRADATION                        |
| 3:182872860  | <i>MCCC1</i>        | KEGG_LYSOSOME                                  |
| 4:77100807   | <i>FAM47E-STBD1</i> | KEGG_LYSOSOME                                  |
| 4:77104152   | <i>FAM47E-STBD1</i> | KEGG_LYSOSOME                                  |
| 4:77124196   | <i>FAM47E-STBD1</i> | KEGG_LYSOSOME                                  |
| 4:77134786   | <i>FAM47E-STBD1</i> | KEGG_LYSOSOME                                  |
| 6:32126002   | <i>HLA-DRB5</i>     | KEGG_LYSOSOME                                  |
| 7:65425894   | <i>GS1-124K5.11</i> | KEGG_LYSOSOME                                  |
| 8:11712443   | <i>CTSB</i>         | KEGG_LYSOSOME                                  |
| 12:123453034 | <i>HIP1R</i>        | KEGG_LYSOSOME                                  |
| 12:124219791 | <i>HIP1R</i>        | KEGG_LYSOSOME                                  |
| 14:88393900  | <i>GALC</i>         | KEGG_LYSOSOME                                  |
| 14:88443553  | <i>GALC</i>         | KEGG_LYSOSOME                                  |
| 19:2114694   | <i>SPPL2B</i>       | KEGG_LYSOSOME                                  |
| 2:102357447  | <i>MAP4K4</i>       | KEGG_MAPK_SIGNALING_PATHWAY                    |
| 2:102413116  | <i>MAP4K4</i>       | KEGG_MAPK_SIGNALING_PATHWAY                    |
| 2:102609356  | <i>MAP4K4</i>       | KEGG_MAPK_SIGNALING_PATHWAY                    |
| 2:102636759  | <i>MAP4K4</i>       | KEGG_MAPK_SIGNALING_PATHWAY                    |
| 17:7578671   | <i>V1NB1</i>        | KEGG_MAPK_SIGNALING_PATHWAY                    |
| 17:43390763  | <i>CRHR1_2</i>      | KEGG_MAPK_SIGNALING_PATHWAY                    |
| 17:43999203  | <i>WNT3</i>         | KEGG_MAPK_SIGNALING_PATHWAY                    |
| 17:44005297  | <i>WNT3</i>         | KEGG_MAPK_SIGNALING_PATHWAY                    |
| 17:44019712  | <i>WNT3</i>         | KEGG_MAPK_SIGNALING_PATHWAY                    |
| 17:44060492  | <i>WNT3</i>         | KEGG_MAPK_SIGNALING_PATHWAY                    |
| 17:44065263  | <i>WNT3</i>         | KEGG_MAPK_SIGNALING_PATHWAY                    |
| 17:44081178  | <i>WNT3</i>         | KEGG_MAPK_SIGNALING_PATHWAY                    |
| 17:44083297  | <i>WNT3</i>         | KEGG_MAPK_SIGNALING_PATHWAY                    |
| 3:123057397  | <i>KPNA1</i>        | KEGG_MELANOGENESIS                             |
| 4:114424939  | <i>CAMK2D</i>       | KEGG_MELANOGENESIS                             |
| 17:7129974   | <i>V1NB1</i>        | KEGG_MELANOGENESIS                             |
| 17:44843651  | <i>WNT3</i>         | KEGG_MELANOGENESIS                             |
| 17:44888209  | <i>WNT3</i>         | KEGG_MELANOGENESIS                             |
| 17:44888715  | <i>WNT3</i>         | KEGG_MELANOGENESIS                             |
| 17:44906949  | <i>WNT3</i>         | KEGG_MELANOGENESIS                             |
| 17:44912901  | <i>WNT3</i>         | KEGG_MELANOGENESIS                             |
| 17:44931399  | <i>WNT3</i>         | KEGG_MELANOGENESIS                             |
| 17:44947756  | <i>WNT3</i>         | KEGG_MELANOGENESIS                             |
| 17:7578671   | <i>V1NB1</i>        | KEGG_MELANOMA                                  |
| 14:75495059  | <i>RPS6KL1</i>      | KEGG_MISMATCH_REPAIR                           |
| 13:49914395  | <i>CAB39L</i>       | KEGG_MTOR_SIGNALING_PATHWAY                    |
| 13:49927732  | <i>CAB39L</i>       | KEGG_MTOR_SIGNALING_PATHWAY                    |
| 13:49948786  | <i>CAB39L</i>       | KEGG_MTOR_SIGNALING_PATHWAY                    |
| 13:49960054  | <i>CAB39L</i>       | KEGG_MTOR_SIGNALING_PATHWAY                    |
| 13:49977462  | <i>CAB39L</i>       | KEGG_MTOR_SIGNALING_PATHWAY                    |
| 6:29798642   | <i>TRIM40</i>       | KEGG_NATURAL_KILLER_CELL_MEDIATED_CYTOTOXICITY |
| 6:112009427  | <i>FYN</i>          | KEGG_NATURAL_KILLER_CELL_MEDIATED_CYTOTOXICITY |
| 6:112056759  | <i>FYN</i>          | KEGG_NATURAL_KILLER_CELL_MEDIATED_CYTOTOXICITY |
| 6:112151452  | <i>FYN</i>          | KEGG_NATURAL_KILLER_CELL_MEDIATED_CYTOTOXICITY |

|              |                 |                                                |
|--------------|-----------------|------------------------------------------------|
| 8:23050400   | <i>BIN3</i>     | KEGG_NATURAL_KILLER_CELL_MEDIATED_CYTOTOXICITY |
| 16:30510571  | <i>SETD1A</i>   | KEGG_NATURAL_KILLER_CELL_MEDIATED_CYTOTOXICITY |
| 16:30516492  | <i>SETD1A</i>   | KEGG_NATURAL_KILLER_CELL_MEDIATED_CYTOTOXICITY |
| 16:30520856  | <i>SETD1A</i>   | KEGG_NATURAL_KILLER_CELL_MEDIATED_CYTOTOXICITY |
| 6:29579544   | <i>TRIM40</i>   | KEGG_NEUROACTIVE_LIGAND_RECEPTOR_INTERACTION   |
| 9:33791164   | <i>UBAP2</i>    | KEGG_NEUROACTIVE_LIGAND_RECEPTOR_INTERACTION   |
| 17:7352976   | <i>V1NB1</i>    | KEGG_NEUROACTIVE_LIGAND_RECEPTOR_INTERACTION   |
| 17:43744203  | <i>CRHR1_2</i>  | KEGG_NEUROACTIVE_LIGAND_RECEPTOR_INTERACTION   |
| 17:43748712  | <i>CRHR1_2</i>  | KEGG_NEUROACTIVE_LIGAND_RECEPTOR_INTERACTION   |
| 17:43767804  | <i>CRHR1_2</i>  | KEGG_NEUROACTIVE_LIGAND_RECEPTOR_INTERACTION   |
| 17:43784228  | <i>CRHR1_2</i>  | KEGG_NEUROACTIVE_LIGAND_RECEPTOR_INTERACTION   |
| 17:43791502  | <i>CRHR1_2</i>  | KEGG_NEUROACTIVE_LIGAND_RECEPTOR_INTERACTION   |
| 17:43843861  | <i>CRHR1_2</i>  | KEGG_NEUROACTIVE_LIGAND_RECEPTOR_INTERACTION   |
| 17:43847503  | <i>CRHR1_2</i>  | KEGG_NEUROACTIVE_LIGAND_RECEPTOR_INTERACTION   |
| 3:49406095   | <i>IP6K2</i>    | KEGG_NEUROTROPHIN_SIGNALING_PATHWAY            |
| 3:49424231   | <i>IP6K2</i>    | KEGG_NEUROTROPHIN_SIGNALING_PATHWAY            |
| 3:49450137   | <i>IP6K2</i>    | KEGG_NEUROTROPHIN_SIGNALING_PATHWAY            |
| 4:114424939  | <i>CAMK2D</i>   | KEGG_NEUROTROPHIN_SIGNALING_PATHWAY            |
| 17:7578671   | <i>V1NB1</i>    | KEGG_NEUROTROPHIN_SIGNALING_PATHWAY            |
| 2:134977261  | <i>TMEM163</i>  | KEGG_N_GLYCAN_BIOSYNTHESIS                     |
| 2:135194840  | <i>TMEM163</i>  | KEGG_N_GLYCAN_BIOSYNTHESIS                     |
| 2:135202455  | <i>TMEM163</i>  | KEGG_N_GLYCAN_BIOSYNTHESIS                     |
| 4:15709252   | <i>BST1</i>     | KEGG_NICOTINATE_AND_NICOTINAMIDE_METABOLISM    |
| 4:15713608   | <i>BST1</i>     | KEGG_NICOTINATE_AND_NICOTINAMIDE_METABOLISM    |
| 4:15724372   | <i>BST1</i>     | KEGG_NICOTINATE_AND_NICOTINAMIDE_METABOLISM    |
| 4:15737882   | <i>BST1</i>     | KEGG_NICOTINATE_AND_NICOTINAMIDE_METABOLISM    |
| 4:15789288   | <i>BST1</i>     | KEGG_NICOTINATE_AND_NICOTINAMIDE_METABOLISM    |
| 4:15816670   | <i>BST1</i>     | KEGG_NICOTINATE_AND_NICOTINAMIDE_METABOLISM    |
| 4:15829612   | <i>BST1</i>     | KEGG_NICOTINATE_AND_NICOTINAMIDE_METABOLISM    |
| 10:104847713 | <i>GBF1</i>     | KEGG_NICOTINATE_AND_NICOTINAMIDE_METABOLISM    |
| 10:104861736 | <i>GBF1</i>     | KEGG_NICOTINATE_AND_NICOTINAMIDE_METABOLISM    |
| 10:104926485 | <i>GBF1</i>     | KEGG_NICOTINATE_AND_NICOTINAMIDE_METABOLISM    |
| 10:104929716 | <i>GBF1</i>     | KEGG_NICOTINATE_AND_NICOTINAMIDE_METABOLISM    |
| 16:50730088  | <i>CASC16</i>   | KEGG_NOD_LIKE_RECEPTOR_SIGNALING_PATHWAY       |
| 16:50730446  | <i>CASC16</i>   | KEGG_NOD_LIKE_RECEPTOR_SIGNALING_PATHWAY       |
| 16:50745926  | <i>CASC16</i>   | KEGG_NOD_LIKE_RECEPTOR_SIGNALING_PATHWAY       |
| 17:7578671   | <i>V1NB1</i>    | KEGG_NON_SMALL_CELL_LUNG_CANCER                |
| 1:227067656  | <i>ITPKB</i>    | KEGG_NOTCH_SIGNALING_PATHWAY                   |
| 3:122289921  | <i>KPNA1</i>    | KEGG_NOTCH_SIGNALING_PATHWAY                   |
| 6:32186193   | <i>HLA-DRB5</i> | KEGG_NOTCH_SIGNALING_PATHWAY                   |
| 17:7129974   | <i>V1NB1</i>    | KEGG_NOTCH_SIGNALING_PATHWAY                   |
| 12:133206648 | <i>FBRSL1</i>   | KEGG_NUCLEOTIDE_EXCISION_REPAIR                |
| 12:133223685 | <i>FBRSL1</i>   | KEGG_NUCLEOTIDE_EXCISION_REPAIR                |
| 12:133225045 | <i>FBRSL1</i>   | KEGG_NUCLEOTIDE_EXCISION_REPAIR                |
| 12:132687184 | <i>FBRSL1</i>   | KEGG_O_GLYCAN_BIOSYNTHESIS                     |
| 4:114424939  | <i>CAMK2D</i>   | KEGG_OLFACTORY_TRANSDUCTION                    |
| 6:29351969   | <i>TRIM40</i>   | KEGG_OLFACTORY_TRANSDUCTION                    |
| 6:29373213   | <i>TRIM40</i>   | KEGG_OLFACTORY_TRANSDUCTION                    |
| 6:29407378   | <i>TRIM40</i>   | KEGG_OLFACTORY_TRANSDUCTION                    |
| 6:29412222   | <i>TRIM40</i>   | KEGG_OLFACTORY_TRANSDUCTION                    |
| 3:123057397  | <i>KPNA1</i>    | KEGG_OOCYTE_MEIOSIS                            |
| 4:114424939  | <i>CAMK2D</i>   | KEGG_OOCYTE_MEIOSIS                            |
| 10:103185542 | <i>GBF1</i>     | KEGG_OOCYTE_MEIOSIS                            |

|              |                     |                                               |
|--------------|---------------------|-----------------------------------------------|
| 10:103308244 | <i>GBF1</i>         | KEGG_OOCYTE_MEIOSIS                           |
| 17:45215865  | <i>WNT3</i>         | KEGG_OOCYTE_MEIOSIS                           |
| 17:45244822  | <i>WNT3</i>         | KEGG_OOCYTE_MEIOSIS                           |
| 1:161171736  | <i>FCGR2A</i>       | KEGG_OXIDATIVE_PHOSPHORYLATION                |
| 12:124219791 | <i>HIP1R</i>        | KEGG_OXIDATIVE_PHOSPHORYLATION                |
| 4:78175384   | <i>FAM47E-STBD1</i> | KEGG_P53_SIGNALING_PATHWAY                    |
| 17:7578671   | <i>V1NB1</i>        | KEGG_P53_SIGNALING_PATHWAY                    |
| 17:7578671   | <i>V1NB1</i>        | KEGG_PANCREATIC_CANCER                        |
| 6:133025715  | <i>RPS12</i>        | KEGG_PANTOTHENATE_AND_COA_BIOSYNTHESIS        |
| 6:133028870  | <i>RPS12</i>        | KEGG_PANTOTHENATE_AND_COA_BIOSYNTHESIS        |
| 6:133034076  | <i>RPS12</i>        | KEGG_PANTOTHENATE_AND_COA_BIOSYNTHESIS        |
| 1:161171736  | <i>FCGR2A</i>       | KEGG_PARKINSONS_DISEASE                       |
| 4:90677243   | <i>SNCA_2</i>       | KEGG_PARKINSONS_DISEASE                       |
| 4:90700329   | <i>SNCA_2</i>       | KEGG_PARKINSONS_DISEASE                       |
| 4:90727315   | <i>SNCA_2</i>       | KEGG_PARKINSONS_DISEASE                       |
| 4:90738839   | <i>SNCA_2</i>       | KEGG_PARKINSONS_DISEASE                       |
| 4:90757294   | <i>SNCA_2</i>       | KEGG_PARKINSONS_DISEASE                       |
| 12:40614434  | <i>LRRK2_2</i>      | KEGG_PARKINSONS_DISEASE                       |
| 12:40614656  | <i>LRRK2_2</i>      | KEGG_PARKINSONS_DISEASE                       |
| 12:40617231  | <i>LRRK2_2</i>      | KEGG_PARKINSONS_DISEASE                       |
| 12:40653993  | <i>LRRK2_2</i>      | KEGG_PARKINSONS_DISEASE                       |
| 12:40698422  | <i>LRRK2_2</i>      | KEGG_PARKINSONS_DISEASE                       |
| 12:40707861  | <i>LRRK2_2</i>      | KEGG_PARKINSONS_DISEASE                       |
| 12:40753796  | <i>LRRK2_2</i>      | KEGG_PARKINSONS_DISEASE                       |
| 1:155975202  | <i>GBAP1</i>        | KEGG_PATHOGENIC_ESCHERICHIA_COLI_INFECTION    |
| 3:49406095   | <i>IP6K2</i>        | KEGG_PATHOGENIC_ESCHERICHIA_COLI_INFECTION    |
| 3:49424231   | <i>IP6K2</i>        | KEGG_PATHOGENIC_ESCHERICHIA_COLI_INFECTION    |
| 3:49450137   | <i>IP6K2</i>        | KEGG_PATHOGENIC_ESCHERICHIA_COLI_INFECTION    |
| 6:112009427  | <i>FYN</i>          | KEGG_PATHOGENIC_ESCHERICHIA_COLI_INFECTION    |
| 6:112056759  | <i>FYN</i>          | KEGG_PATHOGENIC_ESCHERICHIA_COLI_INFECTION    |
| 6:112151452  | <i>FYN</i>          | KEGG_PATHOGENIC_ESCHERICHIA_COLI_INFECTION    |
| 3:49162284   | <i>IP6K2</i>        | KEGG_PATHWAYS_IN_CANCER                       |
| 3:49162583   | <i>IP6K2</i>        | KEGG_PATHWAYS_IN_CANCER                       |
| 3:49406095   | <i>IP6K2</i>        | KEGG_PATHWAYS_IN_CANCER                       |
| 3:49424231   | <i>IP6K2</i>        | KEGG_PATHWAYS_IN_CANCER                       |
| 3:49450137   | <i>IP6K2</i>        | KEGG_PATHWAYS_IN_CANCER                       |
| 6:112561154  | <i>FYN</i>          | KEGG_PATHWAYS_IN_CANCER                       |
| 10:104285824 | <i>GBF1</i>         | KEGG_PATHWAYS_IN_CANCER                       |
| 17:7129974   | <i>V1NB1</i>        | KEGG_PATHWAYS_IN_CANCER                       |
| 17:7578671   | <i>V1NB1</i>        | KEGG_PATHWAYS_IN_CANCER                       |
| 17:39883520  | <i>RETREG3</i>      | KEGG_PATHWAYS_IN_CANCER                       |
| 17:40392358  | <i>RETREG3</i>      | KEGG_PATHWAYS_IN_CANCER                       |
| 17:44843651  | <i>WNT3</i>         | KEGG_PATHWAYS_IN_CANCER                       |
| 17:44888209  | <i>WNT3</i>         | KEGG_PATHWAYS_IN_CANCER                       |
| 17:44888715  | <i>WNT3</i>         | KEGG_PATHWAYS_IN_CANCER                       |
| 17:44906949  | <i>WNT3</i>         | KEGG_PATHWAYS_IN_CANCER                       |
| 17:44912901  | <i>WNT3</i>         | KEGG_PATHWAYS_IN_CANCER                       |
| 17:44931399  | <i>WNT3</i>         | KEGG_PATHWAYS_IN_CANCER                       |
| 17:44947756  | <i>WNT3</i>         | KEGG_PATHWAYS_IN_CANCER                       |
| 7:65425894   | <i>GS1-124K5.11</i> | KEGG_PENTOSE_AND_GLUCURONATE_INTERCONVERSIONS |
| 12:39960237  | <i>LRRK2_2</i>      | KEGG_PEROXISOME                               |
| 12:133295501 | <i>FBRSL1</i>       | KEGG_PEROXISOME                               |
| 1:226910340  | <i>ITPKB</i>        | KEGG_PHOSPHATIDYLINOSITOL_SIGNALING_SYSTEM    |

|              |                     |                                              |
|--------------|---------------------|----------------------------------------------|
| 1:226916078  | <i>ITPKB</i>        | KEGG_PHOSPHATIDYLINOSITOL_SIGNALING_SYSTEM   |
| 17:43195981  | <i>CRHR1_2</i>      | KEGG_PHOSPHATIDYLINOSITOL_SIGNALING_SYSTEM   |
| 7:65425894   | <i>GS1-124K5.11</i> | KEGG_PORPHYRIN_AND_CHLOROPHYLL_METABOLISM    |
| 16:30999462  | <i>SETD1A</i>       | KEGG_PRIMARY_BILE_ACID_BIOSYNTHESIS          |
| 6:32789400   | <i>HLA-DRB5</i>     | KEGG_PRIMARY_IMMUNODEFICIENCY                |
| 6:32791831   | <i>HLA-DRB5</i>     | KEGG_PRIMARY_IMMUNODEFICIENCY                |
| 6:32797361   | <i>HLA-DRB5</i>     | KEGG_PRIMARY_IMMUNODEFICIENCY                |
| 6:32802462   | <i>HLA-DRB5</i>     | KEGG_PRIMARY_IMMUNODEFICIENCY                |
| 6:32814942   | <i>HLA-DRB5</i>     | KEGG_PRIMARY_IMMUNODEFICIENCY                |
| 6:112009427  | <i>FYN</i>          | KEGG_PRION_DISEASES                          |
| 6:112056759  | <i>FYN</i>          | KEGG_PRION_DISEASES                          |
| 6:112151452  | <i>FYN</i>          | KEGG_PRION_DISEASES                          |
| 3:48199695   | <i>IP6K2</i>        | KEGG_PROGESTERONE_MEDIATED_OOCYTE_MATURATION |
| 3:48214438   | <i>IP6K2</i>        | KEGG_PROGESTERONE_MEDIATED_OOCYTE_MATURATION |
| 3:123057397  | <i>KPNA1</i>        | KEGG_PROGESTERONE_MEDIATED_OOCYTE_MATURATION |
| 17:45215865  | <i>WNT3</i>         | KEGG_PROGESTERONE_MEDIATED_OOCYTE_MATURATION |
| 17:45244822  | <i>WNT3</i>         | KEGG_PROGESTERONE_MEDIATED_OOCYTE_MATURATION |
| 17:7578671   | <i>V1NB1</i>        | KEGG_PROSTATE_CANCER                         |
| 6:32814942   | <i>HLA-DRB5</i>     | KEGG_PROTEASOME                              |
| 17:7560294   | <i>V1NB1</i>        | KEGG_PROXIMAL_TUBULE_BICARBONATE_RECLAMATION |
| 3:123057397  | <i>KPNA1</i>        | KEGG_PURINE_METABOLISM                       |
| 5:59236972   | <i>ELOVL7</i>       | KEGG_PURINE_METABOLISM                       |
| 5:59665659   | <i>ELOVL7</i>       | KEGG_PURINE_METABOLISM                       |
| 5:59705316   | <i>ELOVL7</i>       | KEGG_PURINE_METABOLISM                       |
| 5:59736085   | <i>ELOVL7</i>       | KEGG_PURINE_METABOLISM                       |
| 9:34342881   | <i>UBAP2</i>        | KEGG_PURINE_METABOLISM                       |
| 10:104847713 | <i>GBF1</i>         | KEGG_PURINE_METABOLISM                       |
| 10:104861736 | <i>GBF1</i>         | KEGG_PURINE_METABOLISM                       |
| 10:104926485 | <i>GBF1</i>         | KEGG_PURINE_METABOLISM                       |
| 10:104929716 | <i>GBF1</i>         | KEGG_PURINE_METABOLISM                       |
| 11:10392432  | <i>RNF141</i>       | KEGG_PURINE_METABOLISM                       |
| 11:10487997  | <i>RNF141</i>       | KEGG_PURINE_METABOLISM                       |
| 12:133206648 | <i>FBRSL1</i>       | KEGG_PURINE_METABOLISM                       |
| 12:133223685 | <i>FBRSL1</i>       | KEGG_PURINE_METABOLISM                       |
| 12:133225045 | <i>FBRSL1</i>       | KEGG_PURINE_METABOLISM                       |
| 14:74477206  | <i>RPS6KL1</i>      | KEGG_PURINE_METABOLISM                       |
| 9:34342881   | <i>UBAP2</i>        | KEGG_PYRIMIDINE_METABOLISM                   |
| 10:104847713 | <i>GBF1</i>         | KEGG_PYRIMIDINE_METABOLISM                   |
| 10:104861736 | <i>GBF1</i>         | KEGG_PYRIMIDINE_METABOLISM                   |
| 10:104926485 | <i>GBF1</i>         | KEGG_PYRIMIDINE_METABOLISM                   |
| 10:104929716 | <i>GBF1</i>         | KEGG_PYRIMIDINE_METABOLISM                   |
| 12:133206648 | <i>FBRSL1</i>       | KEGG_PYRIMIDINE_METABOLISM                   |
| 12:133223685 | <i>FBRSL1</i>       | KEGG_PYRIMIDINE_METABOLISM                   |
| 12:133225045 | <i>FBRSL1</i>       | KEGG_PYRIMIDINE_METABOLISM                   |
| 14:74477206  | <i>RPS6KL1</i>      | KEGG_PYRIMIDINE_METABOLISM                   |
| 17:76177567  | <i>DNAH17</i>       | KEGG_PYRIMIDINE_METABOLISM                   |
| 3:49406095   | <i>IP6K2</i>        | KEGG_REGULATION_OF_ACTIN_CYTOSKELETON        |
| 3:49424231   | <i>IP6K2</i>        | KEGG_REGULATION_OF_ACTIN_CYTOSKELETON        |
| 3:49450137   | <i>IP6K2</i>        | KEGG_REGULATION_OF_ACTIN_CYTOSKELETON        |
| 10:15569598  | <i>ITGA8</i>        | KEGG_REGULATION_OF_ACTIN_CYTOSKELETON        |
| 10:15652368  | <i>ITGA8</i>        | KEGG_REGULATION_OF_ACTIN_CYTOSKELETON        |
| 16:30510571  | <i>SETD1A</i>       | KEGG_REGULATION_OF_ACTIN_CYTOSKELETON        |
| 16:30516492  | <i>SETD1A</i>       | KEGG_REGULATION_OF_ACTIN_CYTOSKELETON        |

|              |                     |                                                |
|--------------|---------------------|------------------------------------------------|
| 16:30520856  | <i>SETD1A</i>       | KEGG_REGULATION_OF_ACTIN_CYTOSKELETON          |
| 16:31370452  | <i>SETD1A</i>       | KEGG_REGULATION_OF_ACTIN_CYTOSKELETON          |
| 3:49162284   | <i>IP6K2</i>        | KEGG_SMALL_CELL_LUNG_CANCER                    |
| 3:49162583   | <i>IP6K2</i>        | KEGG_SMALL_CELL_LUNG_CANCER                    |
| 6:112561154  | <i>FYN</i>          | KEGG_SMALL_CELL_LUNG_CANCER                    |
| 17:7578671   | <i>V1NB1</i>        | KEGG_SMALL_CELL_LUNG_CANCER                    |
| 1:171689486  | <i>VAMP4</i>        | KEGG_SNARE_INTERACTIONS_IN_VESICULAR_TRANSPORT |
| 16:31004169  | <i>SETD1A</i>       | KEGG_SNARE_INTERACTIONS_IN_VESICULAR_TRANSPORT |
| 17:45059032  | <i>WNT3</i>         | KEGG_SNARE_INTERACTIONS_IN_VESICULAR_TRANSPORT |
| 17:45089680  | <i>WNT3</i>         | KEGG_SNARE_INTERACTIONS_IN_VESICULAR_TRANSPORT |
| 14:88393900  | <i>GALC</i>         | KEGG_SPHINGOLIPID_METABOLISM                   |
| 14:88443553  | <i>GALC</i>         | KEGG_SPHINGOLIPID_METABOLISM                   |
| 6:30628082   | <i>TRIM40</i>       | KEGG_SPLICEOSOME                               |
| 6:30631063   | <i>TRIM40</i>       | KEGG_SPLICEOSOME                               |
| 6:30639369   | <i>TRIM40</i>       | KEGG_SPLICEOSOME                               |
| 17:42929985  | <i>CRHR1_2</i>      | KEGG_SPLICEOSOME                               |
| 7:65425894   | <i>GS1-124K5.11</i> | KEGG_STARCH_AND_SUCROSE_METABOLISM             |
| 17:41056283  | <i>RETREG3</i>      | KEGG_STARCH_AND_SUCROSE_METABOLISM             |
| 10:104591639 | <i>GBF1</i>         | KEGG_STEROID_HORMONE_BIOSYNTHESIS              |
| 6:31873292   | <i>HLA-DRB5</i>     | KEGG_SYSTEMIC_LUPUS_ERYTHEMATOSUS              |
| 6:31879377   | <i>HLA-DRB5</i>     | KEGG_SYSTEMIC_LUPUS_ERYTHEMATOSUS              |
| 6:31895092   | <i>HLA-DRB5</i>     | KEGG_SYSTEMIC_LUPUS_ERYTHEMATOSUS              |
| 6:31897219   | <i>HLA-DRB5</i>     | KEGG_SYSTEMIC_LUPUS_ERYTHEMATOSUS              |
| 6:32602372   | <i>HLA-DRB5</i>     | KEGG_SYSTEMIC_LUPUS_ERYTHEMATOSUS              |
| 6:32930679   | <i>HLA-DRB5</i>     | KEGG_SYSTEMIC_LUPUS_ERYTHEMATOSUS              |
| 6:32934409   | <i>HLA-DRB5</i>     | KEGG_SYSTEMIC_LUPUS_ERYTHEMATOSUS              |
| 6:32973303   | <i>HLA-DRB5</i>     | KEGG_SYSTEMIC_LUPUS_ERYTHEMATOSUS              |
| 6:32974268   | <i>HLA-DRB5</i>     | KEGG_SYSTEMIC_LUPUS_ERYTHEMATOSUS              |
| 3:49406095   | <i>IP6K2</i>        | KEGG_T_CELL_RECEPTOR_SIGNALING_PATHWAY         |
| 3:49424231   | <i>IP6K2</i>        | KEGG_T_CELL_RECEPTOR_SIGNALING_PATHWAY         |
| 3:49450137   | <i>IP6K2</i>        | KEGG_T_CELL_RECEPTOR_SIGNALING_PATHWAY         |
| 6:112009427  | <i>FYN</i>          | KEGG_T_CELL_RECEPTOR_SIGNALING_PATHWAY         |
| 6:112056759  | <i>FYN</i>          | KEGG_T_CELL_RECEPTOR_SIGNALING_PATHWAY         |
| 6:112151452  | <i>FYN</i>          | KEGG_T_CELL_RECEPTOR_SIGNALING_PATHWAY         |
| 17:43390763  | <i>CRHR1_2</i>      | KEGG_T_CELL_RECEPTOR_SIGNALING_PATHWAY         |
| 3:49406095   | <i>IP6K2</i>        | KEGG_TGF_BETA_SIGNALING_PATHWAY                |
| 3:49424231   | <i>IP6K2</i>        | KEGG_TGF_BETA_SIGNALING_PATHWAY                |
| 3:49450137   | <i>IP6K2</i>        | KEGG_TGF_BETA_SIGNALING_PATHWAY                |
| 19:2251817   | <i>SPPL2B</i>       | KEGG_TGF_BETA_SIGNALING_PATHWAY                |
| 17:7578671   | <i>V1NB1</i>        | KEGG_THYROID_CANCER                            |
| 1:155359992  | <i>GBAP1</i>        | KEGG_TIGHT_JUNCTION                            |
| 3:49406095   | <i>IP6K2</i>        | KEGG_TIGHT_JUNCTION                            |
| 3:49424231   | <i>IP6K2</i>        | KEGG_TIGHT_JUNCTION                            |
| 3:49450137   | <i>IP6K2</i>        | KEGG_TIGHT_JUNCTION                            |
| 11:133947732 | <i>IGSF9B</i>       | KEGG_TIGHT_JUNCTION                            |
| 6:29798642   | <i>TRIM40</i>       | KEGG_TYPE_I_DIABETES_MELLITUS                  |
| 6:32602372   | <i>HLA-DRB5</i>     | KEGG_TYPE_I_DIABETES_MELLITUS                  |
| 6:32930679   | <i>HLA-DRB5</i>     | KEGG_TYPE_I_DIABETES_MELLITUS                  |
| 6:32934409   | <i>HLA-DRB5</i>     | KEGG_TYPE_I_DIABETES_MELLITUS                  |
| 6:32973303   | <i>HLA-DRB5</i>     | KEGG_TYPE_I_DIABETES_MELLITUS                  |
| 6:32974268   | <i>HLA-DRB5</i>     | KEGG_TYPE_I_DIABETES_MELLITUS                  |
| 14:55515304  | <i>GCH1</i>         | KEGG_TYPE_II_DIABETES_MELLITUS                 |
| 5:133710339  | <i>C5orf24</i>      | KEGG_UBIQUITIN_MEDIATED_PROTEOLYSIS            |

|              |                 |                                                 |
|--------------|-----------------|-------------------------------------------------|
| 9:33845203   | <i>UBAP2</i>    | KEGG_UBIQUITIN_MEDIATED_PROTEOLYSIS             |
| 10:103185542 | <i>GBF1</i>     | KEGG_UBIQUITIN_MEDIATED_PROTEOLYSIS             |
| 10:103308244 | <i>GBF1</i>     | KEGG_UBIQUITIN_MEDIATED_PROTEOLYSIS             |
| 17:45215865  | <i>WNT3</i>     | KEGG_UBIQUITIN_MEDIATED_PROTEOLYSIS             |
| 17:45244822  | <i>WNT3</i>     | KEGG_UBIQUITIN_MEDIATED_PROTEOLYSIS             |
| 6:31758240   | <i>HLA-DRB5</i> | KEGG_VALINE_LEUCINE_AND_ISOLEUCINE_BIOSYNTHESIS |
| 6:31762311   | <i>HLA-DRB5</i> | KEGG_VALINE_LEUCINE_AND_ISOLEUCINE_BIOSYNTHESIS |
| 3:182760073  | <i>MCCC1</i>    | KEGG_VALINE_LEUCINE_AND_ISOLEUCINE_DEGRADATION  |
| 3:49406095   | <i>IP6K2</i>    | KEGG_VASCULAR_SMOOTH_MUSCLE_CONTRACTION         |
| 3:49424231   | <i>IP6K2</i>    | KEGG_VASCULAR_SMOOTH_MUSCLE_CONTRACTION         |
| 3:49450137   | <i>IP6K2</i>    | KEGG_VASCULAR_SMOOTH_MUSCLE_CONTRACTION         |
| 3:123057397  | <i>KPNA1</i>    | KEGG_VASCULAR_SMOOTH_MUSCLE_CONTRACTION         |
| 11:10647977  | <i>RNF141</i>   | KEGG_VASCULAR_SMOOTH_MUSCLE_CONTRACTION         |
| 11:10648481  | <i>RNF141</i>   | KEGG_VASCULAR_SMOOTH_MUSCLE_CONTRACTION         |
| 11:10660840  | <i>RNF141</i>   | KEGG_VASCULAR_SMOOTH_MUSCLE_CONTRACTION         |
| 17:44800946  | <i>WNT3</i>     | KEGG_VASOPRESSIN_REGULATED_WATER_REABSORPTION   |
| 17:44833217  | <i>WNT3</i>     | KEGG_VASOPRESSIN_REGULATED_WATER_REABSORPTION   |
| 12:124219791 | <i>HIP1R</i>    | KEGG_VIBRIO_CHOLERAЕ_INFECTION                  |
| 3:49561208   | <i>IP6K2</i>    | KEGG_VIRAL_MYOCARDITIS                          |
| 6:29798642   | <i>TRIM40</i>   | KEGG_VIRAL_MYOCARDITIS                          |
| 6:32602372   | <i>HLA-DRB5</i> | KEGG_VIRAL_MYOCARDITIS                          |
| 6:32930679   | <i>HLA-DRB5</i> | KEGG_VIRAL_MYOCARDITIS                          |
| 6:32934409   | <i>HLA-DRB5</i> | KEGG_VIRAL_MYOCARDITIS                          |
| 6:32973303   | <i>HLA-DRB5</i> | KEGG_VIRAL_MYOCARDITIS                          |
| 6:32974268   | <i>HLA-DRB5</i> | KEGG_VIRAL_MYOCARDITIS                          |
| 6:112009427  | <i>FYN</i>      | KEGG_VIRAL_MYOCARDITIS                          |
| 6:112056759  | <i>FYN</i>      | KEGG_VIRAL_MYOCARDITIS                          |
| 6:112151452  | <i>FYN</i>      | KEGG_VIRAL_MYOCARDITIS                          |
| 16:30510571  | <i>SETD1A</i>   | KEGG_VIRAL_MYOCARDITIS                          |
| 16:30516492  | <i>SETD1A</i>   | KEGG_VIRAL_MYOCARDITIS                          |
| 16:30520856  | <i>SETD1A</i>   | KEGG_VIRAL_MYOCARDITIS                          |
| 3:49406095   | <i>IP6K2</i>    | KEGG_WNT_SIGNALING_PATHWAY                      |
| 3:49424231   | <i>IP6K2</i>    | KEGG_WNT_SIGNALING_PATHWAY                      |
| 3:49450137   | <i>IP6K2</i>    | KEGG_WNT_SIGNALING_PATHWAY                      |
| 4:114424939  | <i>CAMK2D</i>   | KEGG_WNT_SIGNALING_PATHWAY                      |
| 10:103185542 | <i>GBF1</i>     | KEGG_WNT_SIGNALING_PATHWAY                      |
| 10:103308244 | <i>GBF1</i>     | KEGG_WNT_SIGNALING_PATHWAY                      |
| 17:7129974   | <i>V1NB1</i>    | KEGG_WNT_SIGNALING_PATHWAY                      |
| 17:7578671   | <i>V1NB1</i>    | KEGG_WNT_SIGNALING_PATHWAY                      |
| 17:44843651  | <i>WNT3</i>     | KEGG_WNT_SIGNALING_PATHWAY                      |
| 17:44888209  | <i>WNT3</i>     | KEGG_WNT_SIGNALING_PATHWAY                      |
| 17:44888715  | <i>WNT3</i>     | KEGG_WNT_SIGNALING_PATHWAY                      |
| 17:44906949  | <i>WNT3</i>     | KEGG_WNT_SIGNALING_PATHWAY                      |
| 17:44912901  | <i>WNT3</i>     | KEGG_WNT_SIGNALING_PATHWAY                      |
| 17:44931399  | <i>WNT3</i>     | KEGG_WNT_SIGNALING_PATHWAY                      |
| 17:44947756  | <i>WNT3</i>     | KEGG_WNT_SIGNALING_PATHWAY                      |
| 3:49162284   | <i>IP6K2</i>    | NABA_BASEMENT_MEMBRANES                         |
| 3:49162583   | <i>IP6K2</i>    | NABA_BASEMENT_MEMBRANES                         |
| 6:112561154  | <i>FYN</i>      | NABA_BASEMENT_MEMBRANES                         |
| 6:33153528   | <i>HLA-DRB5</i> | NABA_COLLAGENS                                  |
| 3:49162284   | <i>IP6K2</i>    | NABA_CORE_MATRISOME                             |
| 3:49162583   | <i>IP6K2</i>    | NABA_CORE_MATRISOME                             |
| 4:90804532   | <i>SNCA_2</i>   | NABA_CORE_MATRISOME                             |

|             |                 |                           |
|-------------|-----------------|---------------------------|
| 4:90868355  | <i>SNCA_2</i>   | NABA_CORE_MATRISOME       |
| 6:32031904  | <i>HLA-DRB5</i> | NABA_CORE_MATRISOME       |
| 6:32062687  | <i>HLA-DRB5</i> | NABA_CORE_MATRISOME       |
| 6:33153528  | <i>HLA-DRB5</i> | NABA_CORE_MATRISOME       |
| 6:112561154 | <i>FYN</i>      | NABA_CORE_MATRISOME       |
| 14:75057014 | <i>RPS6KL1</i>  | NABA_CORE_MATRISOME       |
| 3:122645304 | <i>KPNA1</i>    | NABA_ECM_AFFILIATED       |
| 4:15354235  | <i>BST1</i>     | NABA_ECM_AFFILIATED       |
| 6:31002527  | <i>TRIM40</i>   | NABA_ECM_AFFILIATED       |
| 12:40798608 | <i>LRRK2_2</i>  | NABA_ECM_AFFILIATED       |
| 12:40800267 | <i>LRRK2_2</i>  | NABA_ECM_AFFILIATED       |
| 12:40837264 | <i>LRRK2_2</i>  | NABA_ECM_AFFILIATED       |
| 12:40837331 | <i>LRRK2_2</i>  | NABA_ECM_AFFILIATED       |
| 12:40872410 | <i>LRRK2_2</i>  | NABA_ECM_AFFILIATED       |
| 12:40918443 | <i>LRRK2_2</i>  | NABA_ECM_AFFILIATED       |
| 3:49162284  | <i>IP6K2</i>    | NABA_ECM_GLYCOPROTEINS    |
| 3:49162583  | <i>IP6K2</i>    | NABA_ECM_GLYCOPROTEINS    |
| 4:90804532  | <i>SNCA_2</i>   | NABA_ECM_GLYCOPROTEINS    |
| 4:90868355  | <i>SNCA_2</i>   | NABA_ECM_GLYCOPROTEINS    |
| 6:32031904  | <i>HLA-DRB5</i> | NABA_ECM_GLYCOPROTEINS    |
| 6:32062687  | <i>HLA-DRB5</i> | NABA_ECM_GLYCOPROTEINS    |
| 6:112561154 | <i>FYN</i>      | NABA_ECM_GLYCOPROTEINS    |
| 14:75057014 | <i>RPS6KL1</i>  | NABA_ECM_GLYCOPROTEINS    |
| 1:155027082 | <i>GBAP1</i>    | NABA_ECM_REGULATORS       |
| 1:155033317 | <i>GBAP1</i>    | NABA_ECM_REGULATORS       |
| 8:11712443  | <i>CTSB</i>     | NABA_ECM_REGULATORS       |
| 8:23190941  | <i>BIN3</i>     | NABA_ECM_REGULATORS       |
| 8:23212542  | <i>BIN3</i>     | NABA_ECM_REGULATORS       |
| 8:23223713  | <i>BIN3</i>     | NABA_ECM_REGULATORS       |
| 9:18650547  | <i>SH3GL2_2</i> | NABA_ECM_REGULATORS       |
| 9:33791164  | <i>UBAP2</i>    | NABA_ECM_REGULATORS       |
| 1:155027082 | <i>GBAP1</i>    | NABA_MATRISOME_ASSOCIATED |
| 1:155033317 | <i>GBAP1</i>    | NABA_MATRISOME_ASSOCIATED |
| 3:122645304 | <i>KPNA1</i>    | NABA_MATRISOME_ASSOCIATED |
| 4:15354235  | <i>BST1</i>     | NABA_MATRISOME_ASSOCIATED |
| 6:31002527  | <i>TRIM40</i>   | NABA_MATRISOME_ASSOCIATED |
| 8:11712443  | <i>CTSB</i>     | NABA_MATRISOME_ASSOCIATED |
| 8:23190941  | <i>BIN3</i>     | NABA_MATRISOME_ASSOCIATED |
| 8:23212542  | <i>BIN3</i>     | NABA_MATRISOME_ASSOCIATED |
| 8:23223713  | <i>BIN3</i>     | NABA_MATRISOME_ASSOCIATED |
| 9:18650547  | <i>SH3GL2_2</i> | NABA_MATRISOME_ASSOCIATED |
| 9:33791164  | <i>UBAP2</i>    | NABA_MATRISOME_ASSOCIATED |
| 12:40798608 | <i>LRRK2_2</i>  | NABA_MATRISOME_ASSOCIATED |
| 12:40800267 | <i>LRRK2_2</i>  | NABA_MATRISOME_ASSOCIATED |
| 12:40837264 | <i>LRRK2_2</i>  | NABA_MATRISOME_ASSOCIATED |
| 12:40837331 | <i>LRRK2_2</i>  | NABA_MATRISOME_ASSOCIATED |
| 12:40872410 | <i>LRRK2_2</i>  | NABA_MATRISOME_ASSOCIATED |
| 12:40918443 | <i>LRRK2_2</i>  | NABA_MATRISOME_ASSOCIATED |
| 17:44843651 | <i>WNT3</i>     | NABA_MATRISOME_ASSOCIATED |
| 17:44888209 | <i>WNT3</i>     | NABA_MATRISOME_ASSOCIATED |
| 17:44888715 | <i>WNT3</i>     | NABA_MATRISOME_ASSOCIATED |
| 17:44906949 | <i>WNT3</i>     | NABA_MATRISOME_ASSOCIATED |
| 17:44912901 | <i>WNT3</i>     | NABA_MATRISOME_ASSOCIATED |

|             |                 |                                |
|-------------|-----------------|--------------------------------|
| 17:44931399 | <i>WNT3</i>     | NABA_MATRISOME_ASSOCIATED      |
| 17:44947756 | <i>WNT3</i>     | NABA_MATRISOME_ASSOCIATED      |
| 19:2251817  | <i>SPPL2B</i>   | NABA_MATRISOME_ASSOCIATED      |
| 1:155027082 | <i>GBAP1</i>    | NABA_MATRISOME                 |
| 1:155033317 | <i>GBAP1</i>    | NABA_MATRISOME                 |
| 3:49162284  | <i>IP6K2</i>    | NABA_MATRISOME                 |
| 3:49162583  | <i>IP6K2</i>    | NABA_MATRISOME                 |
| 3:122645304 | <i>KPNA1</i>    | NABA_MATRISOME                 |
| 4:15354235  | <i>BST1</i>     | NABA_MATRISOME                 |
| 4:90804532  | <i>SNCA_2</i>   | NABA_MATRISOME                 |
| 4:90868355  | <i>SNCA_2</i>   | NABA_MATRISOME                 |
| 6:31002527  | <i>TRIM40</i>   | NABA_MATRISOME                 |
| 6:32031904  | <i>HLA-DRB5</i> | NABA_MATRISOME                 |
| 6:32062687  | <i>HLA-DRB5</i> | NABA_MATRISOME                 |
| 6:33153528  | <i>HLA-DRB5</i> | NABA_MATRISOME                 |
| 6:112561154 | <i>FYN</i>      | NABA_MATRISOME                 |
| 8:11712443  | <i>CTSB</i>     | NABA_MATRISOME                 |
| 8:23190941  | <i>BIN3</i>     | NABA_MATRISOME                 |
| 8:23212542  | <i>BIN3</i>     | NABA_MATRISOME                 |
| 8:23223713  | <i>BIN3</i>     | NABA_MATRISOME                 |
| 9:18650547  | <i>SH3GL2_2</i> | NABA_MATRISOME                 |
| 9:33791164  | <i>UBAP2</i>    | NABA_MATRISOME                 |
| 12:40798608 | <i>LRRK2_2</i>  | NABA_MATRISOME                 |
| 12:40800267 | <i>LRRK2_2</i>  | NABA_MATRISOME                 |
| 12:40837264 | <i>LRRK2_2</i>  | NABA_MATRISOME                 |
| 12:40837331 | <i>LRRK2_2</i>  | NABA_MATRISOME                 |
| 12:40872410 | <i>LRRK2_2</i>  | NABA_MATRISOME                 |
| 12:40918443 | <i>LRRK2_2</i>  | NABA_MATRISOME                 |
| 14:75057014 | <i>RPS6KL1</i>  | NABA_MATRISOME                 |
| 17:44843651 | <i>WNT3</i>     | NABA_MATRISOME                 |
| 17:44888209 | <i>WNT3</i>     | NABA_MATRISOME                 |
| 17:44888715 | <i>WNT3</i>     | NABA_MATRISOME                 |
| 17:44906949 | <i>WNT3</i>     | NABA_MATRISOME                 |
| 17:44912901 | <i>WNT3</i>     | NABA_MATRISOME                 |
| 17:44931399 | <i>WNT3</i>     | NABA_MATRISOME                 |
| 17:44947756 | <i>WNT3</i>     | NABA_MATRISOME                 |
| 19:2251817  | <i>SPPL2B</i>   | NABA_MATRISOME                 |
| 17:7455536  | <i>V1NB1</i>    | NABA_SECRETED_FACTORS          |
| 17:44843651 | <i>WNT3</i>     | NABA_SECRETED_FACTORS          |
| 17:44888209 | <i>WNT3</i>     | NABA_SECRETED_FACTORS          |
| 17:44888715 | <i>WNT3</i>     | NABA_SECRETED_FACTORS          |
| 17:44906949 | <i>WNT3</i>     | NABA_SECRETED_FACTORS          |
| 17:44912901 | <i>WNT3</i>     | NABA_SECRETED_FACTORS          |
| 17:44931399 | <i>WNT3</i>     | NABA_SECRETED_FACTORS          |
| 17:44947756 | <i>WNT3</i>     | NABA_SECRETED_FACTORS          |
| 19:2251817  | <i>SPPL2B</i>   | NABA_SECRETED_FACTORS          |
| 3:49162284  | <i>IP6K2</i>    | PID_A6B1_A6B4_INTEGRIN_PATHWAY |
| 3:49162583  | <i>IP6K2</i>    | PID_A6B1_A6B4_INTEGRIN_PATHWAY |
| 6:112561154 | <i>FYN</i>      | PID_A6B1_A6B4_INTEGRIN_PATHWAY |
| 6:112009427 | <i>FYN</i>      | PID_AJDISS_2PATHWAY            |
| 6:112056759 | <i>FYN</i>      | PID_AJDISS_2PATHWAY            |
| 6:112151452 | <i>FYN</i>      | PID_AJDISS_2PATHWAY            |
| 17:39883520 | <i>RETREG3</i>  | PID_AJDISS_2PATHWAY            |

|              |                     |                                   |
|--------------|---------------------|-----------------------------------|
| 19:2251817   | <i>SPPL2B</i>       | PID_ALK2_PATHWAY                  |
| 4:90677243   | <i>SNCA_2</i>       | PID_ALPHA_SYNUCLEIN_PATHWAY       |
| 4:90700329   | <i>SNCA_2</i>       | PID_ALPHA_SYNUCLEIN_PATHWAY       |
| 4:90727315   | <i>SNCA_2</i>       | PID_ALPHA_SYNUCLEIN_PATHWAY       |
| 4:90738839   | <i>SNCA_2</i>       | PID_ALPHA_SYNUCLEIN_PATHWAY       |
| 4:90757294   | <i>SNCA_2</i>       | PID_ALPHA_SYNUCLEIN_PATHWAY       |
| 6:112009427  | <i>FYN</i>          | PID_ALPHA_SYNUCLEIN_PATHWAY       |
| 6:112056759  | <i>FYN</i>          | PID_ALPHA_SYNUCLEIN_PATHWAY       |
| 6:112151452  | <i>FYN</i>          | PID_ALPHA_SYNUCLEIN_PATHWAY       |
| 8:11381148   | <i>CTSB</i>         | PID_ALPHA_SYNUCLEIN_PATHWAY       |
| 10:121114292 | <i>INPP5F</i>       | PID_ALPHA_SYNUCLEIN_PATHWAY       |
| 10:121138071 | <i>INPP5F</i>       | PID_ALPHA_SYNUCLEIN_PATHWAY       |
| 10:121191186 | <i>INPP5F</i>       | PID_ALPHA_SYNUCLEIN_PATHWAY       |
| 3:49406095   | <i>IP6K2</i>        | PID_AMB2_NEUTROPHILS_PATHWAY      |
| 3:49424231   | <i>IP6K2</i>        | PID_AMB2_NEUTROPHILS_PATHWAY      |
| 3:49450137   | <i>IP6K2</i>        | PID_AMB2_NEUTROPHILS_PATHWAY      |
| 6:32151443   | <i>HLA-DRB5</i>     | PID_AMB2_NEUTROPHILS_PATHWAY      |
| 6:112009427  | <i>FYN</i>          | PID_AMB2_NEUTROPHILS_PATHWAY      |
| 6:112056759  | <i>FYN</i>          | PID_AMB2_NEUTROPHILS_PATHWAY      |
| 6:112151452  | <i>FYN</i>          | PID_AMB2_NEUTROPHILS_PATHWAY      |
| 8:11381148   | <i>CTSB</i>         | PID_AMB2_NEUTROPHILS_PATHWAY      |
| 11:133947732 | <i>IGSF9B</i>       | PID_AMB2_NEUTROPHILS_PATHWAY      |
| 6:112009427  | <i>FYN</i>          | PID_ANGIOPOIETIN_RECEPTOR_PATHWAY |
| 6:112056759  | <i>FYN</i>          | PID_ANGIOPOIETIN_RECEPTOR_PATHWAY |
| 6:112151452  | <i>FYN</i>          | PID_ANGIOPOIETIN_RECEPTOR_PATHWAY |
| 17:40392358  | <i>RETREG3</i>      | PID_ANGIOPOIETIN_RECEPTOR_PATHWAY |
| 17:7578671   | <i>V1NB1</i>        | PID_AP1_PATHWAY                   |
| 4:76695927   | <i>FAM47E-STBD1</i> | PID_ARF_3PATHWAY                  |
| 8:131153067  | <i>FAM49B</i>       | PID_ARF_3PATHWAY                  |
| 8:131190319  | <i>FAM49B</i>       | PID_ARF_3PATHWAY                  |
| 8:131427864  | <i>FAM49B</i>       | PID_ARF_3PATHWAY                  |
| 10:104005410 | <i>GBF1</i>         | PID_ARF_3PATHWAY                  |
| 10:104034550 | <i>GBF1</i>         | PID_ARF_3PATHWAY                  |
| 17:45059032  | <i>WNT3</i>         | PID_ARF_3PATHWAY                  |
| 17:45089680  | <i>WNT3</i>         | PID_ARF_3PATHWAY                  |
| 3:49406095   | <i>IP6K2</i>        | PID_ARF6_DOWNSTREAM_PATHWAY       |
| 3:49424231   | <i>IP6K2</i>        | PID_ARF6_DOWNSTREAM_PATHWAY       |
| 3:49450137   | <i>IP6K2</i>        | PID_ARF6_DOWNSTREAM_PATHWAY       |
| 19:3156505   | <i>SPPL2B</i>       | PID_ARF6_PATHWAY                  |
| 10:15569598  | <i>ITGA8</i>        | PID_ARF6_TRAFFICKING_PATHWAY      |
| 10:15652368  | <i>ITGA8</i>        | PID_ARF6_TRAFFICKING_PATHWAY      |
| 6:31862876   | <i>HLA-DRB5</i>     | PID_AR_TF_PATHWAY                 |
| 3:48199695   | <i>IP6K2</i>        | PID_ATM_PATHWAY                   |
| 3:48214438   | <i>IP6K2</i>        | PID_ATM_PATHWAY                   |
| 3:48199695   | <i>IP6K2</i>        | PID_ATR_PATHWAY                   |
| 3:48214438   | <i>IP6K2</i>        | PID_ATR_PATHWAY                   |
| 17:7578671   | <i>V1NB1</i>        | PID_AURORA_A_PATHWAY              |
| 3:49406095   | <i>IP6K2</i>        | PID_AURORA_B_PATHWAY              |
| 3:49424231   | <i>IP6K2</i>        | PID_AURORA_B_PATHWAY              |
| 3:49450137   | <i>IP6K2</i>        | PID_AURORA_B_PATHWAY              |
| 3:49406095   | <i>IP6K2</i>        | PID_AVB3_INTEGRIN_PATHWAY         |
| 3:49424231   | <i>IP6K2</i>        | PID_AVB3_INTEGRIN_PATHWAY         |
| 3:49450137   | <i>IP6K2</i>        | PID_AVB3_INTEGRIN_PATHWAY         |

|             |                 |                                     |
|-------------|-----------------|-------------------------------------|
| 6:33153528  | <i>HLA-DRB5</i> | PID_AVB3_INTEGRIN_PATHWAY           |
| 3:49406095  | <i>IP6K2</i>    | PID_AVB3_OPN_PATHWAY                |
| 3:49424231  | <i>IP6K2</i>    | PID_AVB3_OPN_PATHWAY                |
| 3:49450137  | <i>IP6K2</i>    | PID_AVB3_OPN_PATHWAY                |
| 17:43390763 | <i>CRHR1_2</i>  | PID_AVB3_OPN_PATHWAY                |
| 17:7578671  | <i>V1NB1</i>    | PID_BARD1_PATHWAY                   |
| 17:7129974  | <i>V1NB1</i>    | PID_BETA_CATENIN_DEG_PATHWAY        |
| 19:3022354  | <i>SPPL2B</i>   | PID_BETA_CATENIN_NUC_PATHWAY        |
| 19:3036350  | <i>SPPL2B</i>   | PID_BETA_CATENIN_NUC_PATHWAY        |
| 1:156059276 | <i>GBAP1</i>    | PID_CASPASE_PATHWAY                 |
| 17:43390763 | <i>CRHR1_2</i>  | PID_CD40_PATHWAY                    |
| 6:112009427 | <i>FYN</i>      | PID_CD8_TCR_PATHWAY                 |
| 6:112056759 | <i>FYN</i>      | PID_CD8_TCR_PATHWAY                 |
| 6:112151452 | <i>FYN</i>      | PID_CD8_TCR_PATHWAY                 |
| 17:43390763 | <i>CRHR1_2</i>  | PID_CD8_TCR_PATHWAY                 |
| 1:227182033 | <i>ITPKB</i>    | PID_CDC42_PATHWAY                   |
| 1:227270318 | <i>ITPKB</i>    | PID_CDC42_PATHWAY                   |
| 2:102357447 | <i>MAP4K4</i>   | PID_CERAMIDE_PATHWAY                |
| 2:102413116 | <i>MAP4K4</i>   | PID_CERAMIDE_PATHWAY                |
| 2:101439596 | <i>MAP4K4</i>   | PID_CIRCADIAN_PATHWAY               |
| 2:101550181 | <i>MAP4K4</i>   | PID_CIRCADIAN_PATHWAY               |
| 2:101603812 | <i>MAP4K4</i>   | PID_CIRCADIAN_PATHWAY               |
| 16:30510571 | <i>SETD1A</i>   | PID_CXCR3_PATHWAY                   |
| 16:30516492 | <i>SETD1A</i>   | PID_CXCR3_PATHWAY                   |
| 16:30520856 | <i>SETD1A</i>   | PID_CXCR3_PATHWAY                   |
| 3:49406095  | <i>IP6K2</i>    | PID_CXCR4_PATHWAY                   |
| 3:49424231  | <i>IP6K2</i>    | PID_CXCR4_PATHWAY                   |
| 3:49450137  | <i>IP6K2</i>    | PID_CXCR4_PATHWAY                   |
| 6:112009427 | <i>FYN</i>      | PID_CXCR4_PATHWAY                   |
| 6:112056759 | <i>FYN</i>      | PID_CXCR4_PATHWAY                   |
| 6:112151452 | <i>FYN</i>      | PID_CXCR4_PATHWAY                   |
| 8:11381148  | <i>CTSB</i>     | PID_CXCR4_PATHWAY                   |
| 10:15569598 | <i>ITGA8</i>    | PID_CXCR4_PATHWAY                   |
| 10:15652368 | <i>ITGA8</i>    | PID_CXCR4_PATHWAY                   |
| 17:40392358 | <i>RETREG3</i>  | PID_CXCR4_PATHWAY                   |
| 3:48199695  | <i>IP6K2</i>    | PID_E2F_PATHWAY                     |
| 3:48214438  | <i>IP6K2</i>    | PID_E2F_PATHWAY                     |
| 17:76177567 | <i>DNAH17</i>   | PID_E2F_PATHWAY                     |
| 3:49406095  | <i>IP6K2</i>    | PID_ECADHERIN_KERATINOCYTE_PATHWAY  |
| 3:49424231  | <i>IP6K2</i>    | PID_ECADHERIN_KERATINOCYTE_PATHWAY  |
| 3:49450137  | <i>IP6K2</i>    | PID_ECADHERIN_KERATINOCYTE_PATHWAY  |
| 6:112009427 | <i>FYN</i>      | PID_ECADHERIN_KERATINOCYTE_PATHWAY  |
| 6:112056759 | <i>FYN</i>      | PID_ECADHERIN_KERATINOCYTE_PATHWAY  |
| 6:112151452 | <i>FYN</i>      | PID_ECADHERIN_KERATINOCYTE_PATHWAY  |
| 17:39883520 | <i>RETREG3</i>  | PID_ECADHERIN_KERATINOCYTE_PATHWAY  |
| 3:49406095  | <i>IP6K2</i>    | PID_ECADHERIN_NASCENT_AJ_PATHWAY    |
| 3:49424231  | <i>IP6K2</i>    | PID_ECADHERIN_NASCENT_AJ_PATHWAY    |
| 3:49450137  | <i>IP6K2</i>    | PID_ECADHERIN_NASCENT_AJ_PATHWAY    |
| 17:39883520 | <i>RETREG3</i>  | PID_ECADHERIN_NASCENT_AJ_PATHWAY    |
| 3:49406095  | <i>IP6K2</i>    | PID_ECADHERIN_STABILIZATION_PATHWAY |
| 3:49424231  | <i>IP6K2</i>    | PID_ECADHERIN_STABILIZATION_PATHWAY |
| 3:49450137  | <i>IP6K2</i>    | PID_ECADHERIN_STABILIZATION_PATHWAY |
| 3:49406095  | <i>IP6K2</i>    | PID_ENDOTHELIN_PATHWAY              |

|             |                 |                                   |
|-------------|-----------------|-----------------------------------|
| 3:49424231  | <i>IP6K2</i>    | PID_ENDOTHELIN_PATHWAY            |
| 3:49450137  | <i>IP6K2</i>    | PID_ENDOTHELIN_PATHWAY            |
| 3:123057397 | <i>KPNA1</i>    | PID_ENDOTHELIN_PATHWAY            |
| 19:3156505  | <i>SPPL2B</i>   | PID_ENDOTHELIN_PATHWAY            |
| 3:49406095  | <i>IP6K2</i>    | PID_EPHA2_FWD_PATHWAY             |
| 3:49424231  | <i>IP6K2</i>    | PID_EPHA2_FWD_PATHWAY             |
| 3:49450137  | <i>IP6K2</i>    | PID_EPHA2_FWD_PATHWAY             |
| 3:49406095  | <i>IP6K2</i>    | PID_EPHA_FWDPATHWAY               |
| 3:49424231  | <i>IP6K2</i>    | PID_EPHA_FWDPATHWAY               |
| 3:49450137  | <i>IP6K2</i>    | PID_EPHA_FWDPATHWAY               |
| 6:112009427 | <i>FYN</i>      | PID_EPHA_FWDPATHWAY               |
| 6:112056759 | <i>FYN</i>      | PID_EPHA_FWDPATHWAY               |
| 6:112151452 | <i>FYN</i>      | PID_EPHA_FWDPATHWAY               |
| 8:11381148  | <i>CTSB</i>     | PID_EPHA_FWDPATHWAY               |
| 2:102357447 | <i>MAP4K4</i>   | PID_EPHB_FWD_PATHWAY              |
| 2:102413116 | <i>MAP4K4</i>   | PID_EPHB_FWD_PATHWAY              |
| 6:112009427 | <i>FYN</i>      | PID_EPHRINB_REV_PATHWAY           |
| 6:112056759 | <i>FYN</i>      | PID_EPHRINB_REV_PATHWAY           |
| 6:112151452 | <i>FYN</i>      | PID_EPHRINB_REV_PATHWAY           |
| 8:11381148  | <i>CTSB</i>     | PID_EPHRINB_REV_PATHWAY           |
| 17:40392358 | <i>RETREG3</i>  | PID_EPO_PATHWAY                   |
| 9:17579690  | <i>SH3GL2_2</i> | PID_ERBB1_INTERNALIZATION_PATHWAY |
| 9:17609302  | <i>SH3GL2_2</i> | PID_ERBB1_INTERNALIZATION_PATHWAY |
| 9:17627444  | <i>SH3GL2_2</i> | PID_ERBB1_INTERNALIZATION_PATHWAY |
| 9:17710876  | <i>SH3GL2_2</i> | PID_ERBB1_INTERNALIZATION_PATHWAY |
| 9:17732590  | <i>SH3GL2_2</i> | PID_ERBB1_INTERNALIZATION_PATHWAY |
| 9:17737514  | <i>SH3GL2_2</i> | PID_ERBB1_INTERNALIZATION_PATHWAY |
| 9:17758945  | <i>SH3GL2_2</i> | PID_ERBB1_INTERNALIZATION_PATHWAY |
| 6:112009427 | <i>FYN</i>      | PID_ERBB4_PATHWAY                 |
| 6:112056759 | <i>FYN</i>      | PID_ERBB4_PATHWAY                 |
| 6:112151452 | <i>FYN</i>      | PID_ERBB4_PATHWAY                 |
| 17:7101771  | <i>V1NB1</i>    | PID_ERBB4_PATHWAY                 |
| 17:40392358 | <i>RETREG3</i>  | PID_ERBB4_PATHWAY                 |
| 3:49406095  | <i>IP6K2</i>    | PID_ER_NONGENOMIC_PATHWAY         |
| 3:49424231  | <i>IP6K2</i>    | PID_ER_NONGENOMIC_PATHWAY         |
| 3:49450137  | <i>IP6K2</i>    | PID_ER_NONGENOMIC_PATHWAY         |
| 19:3156505  | <i>SPPL2B</i>   | PID_ER_NONGENOMIC_PATHWAY         |
| 3:49406095  | <i>IP6K2</i>    | PID_FAK_PATHWAY                   |
| 3:49424231  | <i>IP6K2</i>    | PID_FAK_PATHWAY                   |
| 3:49450137  | <i>IP6K2</i>    | PID_FAK_PATHWAY                   |
| 6:112009427 | <i>FYN</i>      | PID_FAK_PATHWAY                   |
| 6:112056759 | <i>FYN</i>      | PID_FAK_PATHWAY                   |
| 6:112151452 | <i>FYN</i>      | PID_FAK_PATHWAY                   |
| 8:131153067 | <i>FAM49B</i>   | PID_FAK_PATHWAY                   |
| 8:131190319 | <i>FAM49B</i>   | PID_FAK_PATHWAY                   |
| 8:131427864 | <i>FAM49B</i>   | PID_FAK_PATHWAY                   |
| 17:59922925 | <i>BRIP1</i>    | PID_FANCONI_PATHWAY               |
| 6:112009427 | <i>FYN</i>      | PID_FCER1_PATHWAY                 |
| 6:112056759 | <i>FYN</i>      | PID_FCER1_PATHWAY                 |
| 6:112151452 | <i>FYN</i>      | PID_FCER1_PATHWAY                 |
| 17:40392358 | <i>RETREG3</i>  | PID_FGF_PATHWAY                   |
| 6:112561154 | <i>FYN</i>      | PID_FOXM1_PATHWAY                 |
| 17:41056283 | <i>RETREG3</i>  | PID_FOXO_PATHWAY                  |

|              |                 |                           |
|--------------|-----------------|---------------------------|
| 6:112009427  | <i>FYN</i>      | PID_GLYPICAN_1PATHWAY     |
| 6:112056759  | <i>FYN</i>      | PID_GLYPICAN_1PATHWAY     |
| 6:112151452  | <i>FYN</i>      | PID_GLYPICAN_1PATHWAY     |
| 8:11381148   | <i>CTSB</i>     | PID_GLYPICAN_1PATHWAY     |
| 17:40392358  | <i>RETREG3</i>  | PID_GMCSF_PATHWAY         |
| 17:7578671   | <i>V1NB1</i>    | PID_HDAC_CLASSIII_PATHWAY |
| 2:169999639  | <i>STK39</i>    | PID_HEDGEHOG_2PATHWAY     |
| 2:170028024  | <i>STK39</i>    | PID_HEDGEHOG_2PATHWAY     |
| 10:104285824 | <i>GBF1</i>     | PID_HEDGEHOG_GLI_PATHWAY  |
| 4:114424939  | <i>CAMK2D</i>   | PID_HES_HEY_PATHWAY       |
| 17:7578671   | <i>V1NB1</i>    | PID_HIF1A_PATHWAY         |
| 15:61293467  | <i>VPS13C</i>   | PID_HIF1_TFPATHWAY        |
| 17:43390763  | <i>CRHR1_2</i>  | PID_HIV_NEF_PATHWAY       |
| 14:38061742  | <i>MIPOL1</i>   | PID_HNF3A_PATHWAY         |
| 14:38061742  | <i>MIPOL1</i>   | PID_HNF3B_PATHWAY         |
| 17:41056283  | <i>RETREG3</i>  | PID_HNF3B_PATHWAY         |
| 4:114424939  | <i>CAMK2D</i>   | PID_IFNG_PATHWAY          |
| 2:103063855  | <i>MAP4K4</i>   | PID_IL12_2PATHWAY         |
| 2:103063855  | <i>MAP4K4</i>   | PID_IL12_STAT4_PATHWAY    |
| 2:102609356  | <i>MAP4K4</i>   | PID_IL1_PATHWAY           |
| 2:102636759  | <i>MAP4K4</i>   | PID_IL1_PATHWAY           |
| 3:49406095   | <i>IP6K2</i>    | PID_IL2_1PATHWAY          |
| 3:49424231   | <i>IP6K2</i>    | PID_IL2_1PATHWAY          |
| 3:49450137   | <i>IP6K2</i>    | PID_IL2_1PATHWAY          |
| 6:112009427  | <i>FYN</i>      | PID_IL2_1PATHWAY          |
| 6:112056759  | <i>FYN</i>      | PID_IL2_1PATHWAY          |
| 6:112151452  | <i>FYN</i>      | PID_IL2_1PATHWAY          |
| 17:40392358  | <i>RETREG3</i>  | PID_IL2_1PATHWAY          |
| 2:103063855  | <i>MAP4K4</i>   | PID_IL23_PATHWAY          |
| 17:7983799   | <i>V1NB1</i>    | PID_IL23_PATHWAY          |
| 17:40392358  | <i>RETREG3</i>  | PID_IL2_STAT5_PATHWAY     |
| 17:40392358  | <i>RETREG3</i>  | PID_IL3_PATHWAY           |
| 17:40392358  | <i>RETREG3</i>  | PID_IL4_2PATHWAY          |
| 17:40392358  | <i>RETREG3</i>  | PID_IL5_PATHWAY           |
| 19:3156505   | <i>SPPL2B</i>   | PID_IL8_CXCR1_PATHWAY     |
| 19:3156505   | <i>SPPL2B</i>   | PID_IL8_CXCR2_PATHWAY     |
| 3:49162284   | <i>IP6K2</i>    | PID_INTEGRIN1_PATHWAY     |
| 3:49162583   | <i>IP6K2</i>    | PID_INTEGRIN1_PATHWAY     |
| 6:33153528   | <i>HLA-DRB5</i> | PID_INTEGRIN1_PATHWAY     |
| 6:112561154  | <i>FYN</i>      | PID_INTEGRIN1_PATHWAY     |
| 10:15569598  | <i>ITGA8</i>    | PID_INTEGRIN1_PATHWAY     |
| 10:15652368  | <i>ITGA8</i>    | PID_INTEGRIN1_PATHWAY     |
| 11:133947732 | <i>IGSF9B</i>   | PID_INTEGRIN2_PATHWAY     |
| 16:30510571  | <i>SETD1A</i>   | PID_INTEGRIN2_PATHWAY     |
| 16:30516492  | <i>SETD1A</i>   | PID_INTEGRIN2_PATHWAY     |
| 16:30520856  | <i>SETD1A</i>   | PID_INTEGRIN2_PATHWAY     |
| 16:31370452  | <i>SETD1A</i>   | PID_INTEGRIN2_PATHWAY     |
| 6:112561154  | <i>FYN</i>      | PID_INTEGRIN3_PATHWAY     |
| 3:49162284   | <i>IP6K2</i>    | PID_INTEGRIN4_PATHWAY     |
| 3:49162583   | <i>IP6K2</i>    | PID_INTEGRIN4_PATHWAY     |
| 1:155027082  | <i>GBAP1</i>    | PID_INTEGRIN_A9B1_PATHWAY |
| 1:155033317  | <i>GBAP1</i>    | PID_INTEGRIN_A9B1_PATHWAY |
| 10:15569598  | <i>ITGA8</i>    | PID_INTEGRIN_CS_PATHWAY   |

|              |                 |                              |
|--------------|-----------------|------------------------------|
| 10:15652368  | <i>ITGA8</i>    | PID_INTEGRIN_CS_PATHWAY      |
| 16:30510571  | <i>SETD1A</i>   | PID_INTEGRIN_CS_PATHWAY      |
| 16:30516492  | <i>SETD1A</i>   | PID_INTEGRIN_CS_PATHWAY      |
| 16:30520856  | <i>SETD1A</i>   | PID_INTEGRIN_CS_PATHWAY      |
| 16:31370452  | <i>SETD1A</i>   | PID_INTEGRIN_CS_PATHWAY      |
| 3:49406095   | <i>IP6K2</i>    | PID_LIS1_PATHWAY             |
| 3:49424231   | <i>IP6K2</i>    | PID_LIS1_PATHWAY             |
| 3:49450137   | <i>IP6K2</i>    | PID_LIS1_PATHWAY             |
| 12:122816734 | <i>HIP1R</i>    | PID_LIS1_PATHWAY             |
| 12:122817580 | <i>HIP1R</i>    | PID_LIS1_PATHWAY             |
| 12:122853197 | <i>HIP1R</i>    | PID_LIS1_PATHWAY             |
| 1:227067656  | <i>ITPKB</i>    | PID_LKB1_PATHWAY             |
| 17:7578671   | <i>V1NB1</i>    | PID_LKB1_PATHWAY             |
| 17:43999203  | <i>WNT3</i>     | PID_LKB1_PATHWAY             |
| 17:44005297  | <i>WNT3</i>     | PID_LKB1_PATHWAY             |
| 17:44019712  | <i>WNT3</i>     | PID_LKB1_PATHWAY             |
| 17:44060492  | <i>WNT3</i>     | PID_LKB1_PATHWAY             |
| 17:44065263  | <i>WNT3</i>     | PID_LKB1_PATHWAY             |
| 17:44081178  | <i>WNT3</i>     | PID_LKB1_PATHWAY             |
| 17:44083297  | <i>WNT3</i>     | PID_LKB1_PATHWAY             |
| 3:123057397  | <i>KPNA1</i>    | PID_LPA4_PATHWAY             |
| 3:49406095   | <i>IP6K2</i>    | PID_LYSOPHOSPHOLIPID_PATHWAY |
| 3:49424231   | <i>IP6K2</i>    | PID_LYSOPHOSPHOLIPID_PATHWAY |
| 3:49450137   | <i>IP6K2</i>    | PID_LYSOPHOSPHOLIPID_PATHWAY |
| 3:123057397  | <i>KPNA1</i>    | PID_LYSOPHOSPHOLIPID_PATHWAY |
| 17:43999203  | <i>WNT3</i>     | PID_LYSOPHOSPHOLIPID_PATHWAY |
| 17:44005297  | <i>WNT3</i>     | PID_LYSOPHOSPHOLIPID_PATHWAY |
| 17:44019712  | <i>WNT3</i>     | PID_LYSOPHOSPHOLIPID_PATHWAY |
| 17:44060492  | <i>WNT3</i>     | PID_LYSOPHOSPHOLIPID_PATHWAY |
| 17:44065263  | <i>WNT3</i>     | PID_LYSOPHOSPHOLIPID_PATHWAY |
| 17:44081178  | <i>WNT3</i>     | PID_LYSOPHOSPHOLIPID_PATHWAY |
| 17:44083297  | <i>WNT3</i>     | PID_LYSOPHOSPHOLIPID_PATHWAY |
| 19:3156505   | <i>SPPL2B</i>   | PID_LYSOPHOSPHOLIPID_PATHWAY |
| 18:40543738  | <i>RIT2</i>     | PID_MAPK_TRK_PATHWAY         |
| 18:40596271  | <i>RIT2</i>     | PID_MAPK_TRK_PATHWAY         |
| 18:40612823  | <i>RIT2</i>     | PID_MAPK_TRK_PATHWAY         |
| 18:40649778  | <i>RIT2</i>     | PID_MAPK_TRK_PATHWAY         |
| 18:40673380  | <i>RIT2</i>     | PID_MAPK_TRK_PATHWAY         |
| 3:49406095   | <i>IP6K2</i>    | PID_MET_PATHWAY              |
| 3:49424231   | <i>IP6K2</i>    | PID_MET_PATHWAY              |
| 3:49450137   | <i>IP6K2</i>    | PID_MET_PATHWAY              |
| 9:17579690   | <i>SH3GL2_2</i> | PID_MET_PATHWAY              |
| 9:17609302   | <i>SH3GL2_2</i> | PID_MET_PATHWAY              |
| 9:17627444   | <i>SH3GL2_2</i> | PID_MET_PATHWAY              |
| 9:17710876   | <i>SH3GL2_2</i> | PID_MET_PATHWAY              |
| 9:17732590   | <i>SH3GL2_2</i> | PID_MET_PATHWAY              |
| 9:17737514   | <i>SH3GL2_2</i> | PID_MET_PATHWAY              |
| 9:17758945   | <i>SH3GL2_2</i> | PID_MET_PATHWAY              |
| 3:49406095   | <i>IP6K2</i>    | PID_MTOR_4PATHWAY            |
| 3:49424231   | <i>IP6K2</i>    | PID_MTOR_4PATHWAY            |
| 3:49450137   | <i>IP6K2</i>    | PID_MTOR_4PATHWAY            |
| 12:122816734 | <i>HIP1R</i>    | PID_MTOR_4PATHWAY            |
| 12:122817580 | <i>HIP1R</i>    | PID_MTOR_4PATHWAY            |

|              |                 |                                       |
|--------------|-----------------|---------------------------------------|
| 12:122853197 | <i>HIP1R</i>    | PID_MTOR_4PATHWAY                     |
| 17:7479140   | <i>V1NB1</i>    | PID_MTOR_4PATHWAY                     |
| 17:7480325   | <i>V1NB1</i>    | PID_MTOR_4PATHWAY                     |
| 3:48199695   | <i>IP6K2</i>    | PID_MYC_ACTIV_PATHWAY                 |
| 3:48214438   | <i>IP6K2</i>    | PID_MYC_ACTIV_PATHWAY                 |
| 5:60273923   | <i>ELOVL7</i>   | PID_MYC_ACTIV_PATHWAY                 |
| 17:7479140   | <i>V1NB1</i>    | PID_MYC_ACTIV_PATHWAY                 |
| 17:7480325   | <i>V1NB1</i>    | PID_MYC_ACTIV_PATHWAY                 |
| 17:7578671   | <i>V1NB1</i>    | PID_MYC_ACTIV_PATHWAY                 |
| 17:76177567  | <i>DNAH17</i>   | PID_MYC_ACTIV_PATHWAY                 |
| 3:49406095   | <i>IP6K2</i>    | PID_NCADHERIN_PATHWAY                 |
| 3:49424231   | <i>IP6K2</i>    | PID_NCADHERIN_PATHWAY                 |
| 3:49450137   | <i>IP6K2</i>    | PID_NCADHERIN_PATHWAY                 |
| 17:39883520  | <i>RETREG3</i>  | PID_NCADHERIN_PATHWAY                 |
| 6:112009427  | <i>FYN</i>      | PID_NEPHRIN_NEPH1_PATHWAY             |
| 6:112056759  | <i>FYN</i>      | PID_NEPHRIN_NEPH1_PATHWAY             |
| 6:112151452  | <i>FYN</i>      | PID_NEPHRIN_NEPH1_PATHWAY             |
| 3:49406095   | <i>IP6K2</i>    | PID_NETRIN_PATHWAY                    |
| 3:49424231   | <i>IP6K2</i>    | PID_NETRIN_PATHWAY                    |
| 3:49450137   | <i>IP6K2</i>    | PID_NETRIN_PATHWAY                    |
| 6:112009427  | <i>FYN</i>      | PID_NETRIN_PATHWAY                    |
| 6:112056759  | <i>FYN</i>      | PID_NETRIN_PATHWAY                    |
| 6:112151452  | <i>FYN</i>      | PID_NETRIN_PATHWAY                    |
| 16:50730088  | <i>CASC16</i>   | PID_NFKAPPAB_CANONICAL_PATHWAY        |
| 16:50730446  | <i>CASC16</i>   | PID_NFKAPPAB_CANONICAL_PATHWAY        |
| 16:50745926  | <i>CASC16</i>   | PID_NFKAPPAB_CANONICAL_PATHWAY        |
| 6:32186193   | <i>HLA-DRB5</i> | PID_NOTCH_PATHWAY                     |
| 12:41147295  | <i>LRRK2_2</i>  | PID_NOTCH_PATHWAY                     |
| 12:41251554  | <i>LRRK2_2</i>  | PID_NOTCH_PATHWAY                     |
| 12:41407403  | <i>LRRK2_2</i>  | PID_NOTCH_PATHWAY                     |
| 1:161875645  | <i>FCGR2A</i>   | PID_P38_ALPHA_BETA_DOWNSTREAM_PATHWAY |
| 1:161930954  | <i>FCGR2A</i>   | PID_P38_ALPHA_BETA_DOWNSTREAM_PATHWAY |
| 17:7578671   | <i>V1NB1</i>    | PID_P38_ALPHA_BETA_DOWNSTREAM_PATHWAY |
| 6:112009427  | <i>FYN</i>      | PID_P38_ALPHA_BETA_PATHWAY            |
| 6:112056759  | <i>FYN</i>      | PID_P38_ALPHA_BETA_PATHWAY            |
| 6:112151452  | <i>FYN</i>      | PID_P38_ALPHA_BETA_PATHWAY            |
| 8:11381148   | <i>CTSB</i>     | PID_P38_ALPHA_BETA_PATHWAY            |
| 17:43999203  | <i>WNT3</i>     | PID_P38_GAMMA_DELTA_PATHWAY           |
| 17:44005297  | <i>WNT3</i>     | PID_P38_GAMMA_DELTA_PATHWAY           |
| 17:44019712  | <i>WNT3</i>     | PID_P38_GAMMA_DELTA_PATHWAY           |
| 17:44060492  | <i>WNT3</i>     | PID_P38_GAMMA_DELTA_PATHWAY           |
| 17:44065263  | <i>WNT3</i>     | PID_P38_GAMMA_DELTA_PATHWAY           |
| 17:44081178  | <i>WNT3</i>     | PID_P38_GAMMA_DELTA_PATHWAY           |
| 17:44083297  | <i>WNT3</i>     | PID_P38_GAMMA_DELTA_PATHWAY           |
| 2:102357447  | <i>MAP4K4</i>   | PID_P53_DOWNSTREAM_PATHWAY            |
| 2:102413116  | <i>MAP4K4</i>   | PID_P53_DOWNSTREAM_PATHWAY            |
| 6:32814942   | <i>HLA-DRB5</i> | PID_P53_DOWNSTREAM_PATHWAY            |
| 8:23050400   | <i>BIN3</i>     | PID_P53_DOWNSTREAM_PATHWAY            |
| 14:38061742  | <i>MIPOL1</i>   | PID_P53_DOWNSTREAM_PATHWAY            |
| 17:7578671   | <i>V1NB1</i>    | PID_P53_DOWNSTREAM_PATHWAY            |
| 17:7578671   | <i>V1NB1</i>    | PID_P53_REGULATION_PATHWAY            |
| 1:161171736  | <i>FCGR2A</i>   | PID_P73PATHWAY                        |
| 3:49406095   | <i>IP6K2</i>    | PID_P75_NTR_PATHWAY                   |

|             |                 |                                  |
|-------------|-----------------|----------------------------------|
| 3:49424231  | <i>IP6K2</i>    | PID_P75_NTR_PATHWAY              |
| 3:49450137  | <i>IP6K2</i>    | PID_P75_NTR_PATHWAY              |
| 17:7578671  | <i>V1NB1</i>    | PID_P75_NTR_PATHWAY              |
| 3:49406095  | <i>IP6K2</i>    | PID_PDGFRRB_PATHWAY              |
| 3:49424231  | <i>IP6K2</i>    | PID_PDGFRRB_PATHWAY              |
| 3:49450137  | <i>IP6K2</i>    | PID_PDGFRRB_PATHWAY              |
| 6:112009427 | <i>FYN</i>      | PID_PDGFRRB_PATHWAY              |
| 6:112056759 | <i>FYN</i>      | PID_PDGFRRB_PATHWAY              |
| 6:112151452 | <i>FYN</i>      | PID_PDGFRRB_PATHWAY              |
| 8:11381148  | <i>CTSB</i>     | PID_PDGFRRB_PATHWAY              |
| 17:40392358 | <i>RETREG3</i>  | PID_PDGFRRB_PATHWAY              |
| 3:49406095  | <i>IP6K2</i>    | PID_PI3KCI_PATHWAY               |
| 3:49424231  | <i>IP6K2</i>    | PID_PI3KCI_PATHWAY               |
| 3:49450137  | <i>IP6K2</i>    | PID_PI3KCI_PATHWAY               |
| 6:112009427 | <i>FYN</i>      | PID_PI3KCI_PATHWAY               |
| 6:112056759 | <i>FYN</i>      | PID_PI3KCI_PATHWAY               |
| 6:112151452 | <i>FYN</i>      | PID_PI3KCI_PATHWAY               |
| 8:11381148  | <i>CTSB</i>     | PID_PI3KCI_PATHWAY               |
| 17:76727455 | <i>DNAH17</i>   | PID_PI3KCI_PATHWAY               |
| 3:49406095  | <i>IP6K2</i>    | PID_PLK1_PATHWAY                 |
| 3:49424231  | <i>IP6K2</i>    | PID_PLK1_PATHWAY                 |
| 3:49450137  | <i>IP6K2</i>    | PID_PLK1_PATHWAY                 |
| 3:49406095  | <i>IP6K2</i>    | PID_PRL_SIGNALING_EVENTS_PATHWAY |
| 3:49424231  | <i>IP6K2</i>    | PID_PRL_SIGNALING_EVENTS_PATHWAY |
| 3:49450137  | <i>IP6K2</i>    | PID_PRL_SIGNALING_EVENTS_PATHWAY |
| 3:49406095  | <i>IP6K2</i>    | PID_PTP1B_PATHWAY                |
| 3:49424231  | <i>IP6K2</i>    | PID_PTP1B_PATHWAY                |
| 3:49450137  | <i>IP6K2</i>    | PID_PTP1B_PATHWAY                |
| 6:112009427 | <i>FYN</i>      | PID_PTP1B_PATHWAY                |
| 6:112056759 | <i>FYN</i>      | PID_PTP1B_PATHWAY                |
| 6:112151452 | <i>FYN</i>      | PID_PTP1B_PATHWAY                |
| 8:11381148  | <i>CTSB</i>     | PID_PTP1B_PATHWAY                |
| 17:40392358 | <i>RETREG3</i>  | PID_PTP1B_PATHWAY                |
| 1:155975202 | <i>GBAP1</i>    | PID_RAC1_REG_PATHWAY             |
| 6:32941506  | <i>HLA-DRB5</i> | PID_RB_1PATHWAY                  |
| 1:155975202 | <i>GBAP1</i>    | PID_REELIN_PATHWAY               |
| 6:112009427 | <i>FYN</i>      | PID_REELIN_PATHWAY               |
| 6:112056759 | <i>FYN</i>      | PID_REELIN_PATHWAY               |
| 6:112151452 | <i>FYN</i>      | PID_REELIN_PATHWAY               |
| 17:43999203 | <i>WNT3</i>     | PID_REELIN_PATHWAY               |
| 17:44005297 | <i>WNT3</i>     | PID_REELIN_PATHWAY               |
| 17:44019712 | <i>WNT3</i>     | PID_REELIN_PATHWAY               |
| 17:44060492 | <i>WNT3</i>     | PID_REELIN_PATHWAY               |
| 17:44065263 | <i>WNT3</i>     | PID_REELIN_PATHWAY               |
| 17:44081178 | <i>WNT3</i>     | PID_REELIN_PATHWAY               |
| 17:44083297 | <i>WNT3</i>     | PID_REELIN_PATHWAY               |
| 17:7578671  | <i>V1NB1</i>    | PID_REG_GR_PATHWAY               |
| 17:40392358 | <i>RETREG3</i>  | PID_REG_GR_PATHWAY               |
| 3:49406095  | <i>IP6K2</i>    | PID_RET_PATHWAY                  |
| 3:49424231  | <i>IP6K2</i>    | PID_RET_PATHWAY                  |
| 3:49450137  | <i>IP6K2</i>    | PID_RET_PATHWAY                  |
| 3:49406095  | <i>IP6K2</i>    | PID_RHOA_PATHWAY                 |
| 3:49424231  | <i>IP6K2</i>    | PID_RHOA_PATHWAY                 |

|             |                 |                        |
|-------------|-----------------|------------------------|
| 3:49450137  | <i>IP6K2</i>    | PID_RHOA_PATHWAY       |
| 9:17579690  | <i>SH3GL2_2</i> | PID_RHOA_PATHWAY       |
| 9:17609302  | <i>SH3GL2_2</i> | PID_RHOA_PATHWAY       |
| 9:17627444  | <i>SH3GL2_2</i> | PID_RHOA_PATHWAY       |
| 9:17710876  | <i>SH3GL2_2</i> | PID_RHOA_PATHWAY       |
| 9:17732590  | <i>SH3GL2_2</i> | PID_RHOA_PATHWAY       |
| 9:17737514  | <i>SH3GL2_2</i> | PID_RHOA_PATHWAY       |
| 9:17758945  | <i>SH3GL2_2</i> | PID_RHOA_PATHWAY       |
| 1:155975202 | <i>GBAP1</i>    | PID_RHOA_REG_PATHWAY   |
| 3:49406095  | <i>IP6K2</i>    | PID_RHOA_REG_PATHWAY   |
| 3:49424231  | <i>IP6K2</i>    | PID_RHOA_REG_PATHWAY   |
| 3:49450137  | <i>IP6K2</i>    | PID_RHOA_REG_PATHWAY   |
| 19:3156505  | <i>SPPL2B</i>   | PID_S1P_META_PATHWAY   |
| 3:49406095  | <i>IP6K2</i>    | PID_S1P_S1P1_PATHWAY   |
| 3:49424231  | <i>IP6K2</i>    | PID_S1P_S1P1_PATHWAY   |
| 3:49450137  | <i>IP6K2</i>    | PID_S1P_S1P1_PATHWAY   |
| 3:49406095  | <i>IP6K2</i>    | PID_S1P_S1P2_PATHWAY   |
| 3:49424231  | <i>IP6K2</i>    | PID_S1P_S1P2_PATHWAY   |
| 3:49450137  | <i>IP6K2</i>    | PID_S1P_S1P2_PATHWAY   |
| 19:3156505  | <i>SPPL2B</i>   | PID_S1P_S1P2_PATHWAY   |
| 3:49406095  | <i>IP6K2</i>    | PID_S1P_S1P3_PATHWAY   |
| 3:49424231  | <i>IP6K2</i>    | PID_S1P_S1P3_PATHWAY   |
| 3:49450137  | <i>IP6K2</i>    | PID_S1P_S1P3_PATHWAY   |
| 19:3156505  | <i>SPPL2B</i>   | PID_S1P_S1P3_PATHWAY   |
| 3:49406095  | <i>IP6K2</i>    | PID_S1P_S1P4_PATHWAY   |
| 3:49424231  | <i>IP6K2</i>    | PID_S1P_S1P4_PATHWAY   |
| 3:49450137  | <i>IP6K2</i>    | PID_S1P_S1P4_PATHWAY   |
| 3:49406095  | <i>IP6K2</i>    | PID_SHP2_PATHWAY       |
| 3:49424231  | <i>IP6K2</i>    | PID_SHP2_PATHWAY       |
| 3:49450137  | <i>IP6K2</i>    | PID_SHP2_PATHWAY       |
| 6:33153528  | <i>HLA-DRB5</i> | PID_SYNDECAN_1_PATHWAY |
| 3:49406095  | <i>IP6K2</i>    | PID_SYNDECAN_2_PATHWAY |
| 3:49424231  | <i>IP6K2</i>    | PID_SYNDECAN_2_PATHWAY |
| 3:49450137  | <i>IP6K2</i>    | PID_SYNDECAN_2_PATHWAY |
| 6:112009427 | <i>FYN</i>      | PID_SYNDECAN_3_PATHWAY |
| 6:112056759 | <i>FYN</i>      | PID_SYNDECAN_3_PATHWAY |
| 6:112151452 | <i>FYN</i>      | PID_SYNDECAN_3_PATHWAY |
| 3:49406095  | <i>IP6K2</i>    | PID_SYNDECAN_4_PATHWAY |
| 3:49424231  | <i>IP6K2</i>    | PID_SYNDECAN_4_PATHWAY |
| 3:49450137  | <i>IP6K2</i>    | PID_SYNDECAN_4_PATHWAY |
| 17:40392358 | <i>RETREG3</i>  | PID_TCPTP_PATHWAY      |
| 2:168931636 | <i>STK39</i>    | PID_TCR_PATHWAY        |
| 2:168979290 | <i>STK39</i>    | PID_TCR_PATHWAY        |
| 2:169016304 | <i>STK39</i>    | PID_TCR_PATHWAY        |
| 2:169023263 | <i>STK39</i>    | PID_TCR_PATHWAY        |
| 6:112009427 | <i>FYN</i>      | PID_TCR_PATHWAY        |
| 6:112056759 | <i>FYN</i>      | PID_TCR_PATHWAY        |
| 6:112151452 | <i>FYN</i>      | PID_TCR_PATHWAY        |
| 17:43390763 | <i>CRHR1_2</i>  | PID_TCR_PATHWAY        |
| 3:49406095  | <i>IP6K2</i>    | PID_TGFBR_PATHWAY      |
| 3:49424231  | <i>IP6K2</i>    | PID_TGFBR_PATHWAY      |
| 3:49450137  | <i>IP6K2</i>    | PID_TGFBR_PATHWAY      |
| 3:150298317 | <i>MED12L</i>   | PID_TGFBR_PATHWAY      |

|              |        |                                            |
|--------------|--------|--------------------------------------------|
| 3:49406095   | IP6K2  | PID_THROMBIN_PAR1_PATHWAY                  |
| 3:49424231   | IP6K2  | PID_THROMBIN_PAR1_PATHWAY                  |
| 3:49450137   | IP6K2  | PID_THROMBIN_PAR1_PATHWAY                  |
| 19:3156505   | SPPL2B | PID_THROMBIN_PAR1_PATHWAY                  |
| 3:49406095   | IP6K2  | PID_THROMBIN_PAR4_PATHWAY                  |
| 3:49424231   | IP6K2  | PID_THROMBIN_PAR4_PATHWAY                  |
| 3:49450137   | IP6K2  | PID_THROMBIN_PAR4_PATHWAY                  |
| 19:3156505   | SPPL2B | PID_THROMBIN_PAR4_PATHWAY                  |
| 2:102357447  | MAP4K4 | PID_TNF_PATHWAY                            |
| 2:102413116  | MAP4K4 | PID_TNF_PATHWAY                            |
| 3:49406095   | IP6K2  | PID_TOLL_ENDOGENOUS_PATHWAY                |
| 3:49424231   | IP6K2  | PID_TOLL_ENDOGENOUS_PATHWAY                |
| 3:49450137   | IP6K2  | PID_TOLL_ENDOGENOUS_PATHWAY                |
| 1:155698425  | GBAP1  | PID_TRAIL_PATHWAY                          |
| 8:23050400   | BIN3   | PID_TRAIL_PATHWAY                          |
| 3:49406095   | IP6K2  | PID_TRKR_PATHWAY                           |
| 3:49424231   | IP6K2  | PID_TRKR_PATHWAY                           |
| 3:49450137   | IP6K2  | PID_TRKR_PATHWAY                           |
| 18:40543738  | RIT2   | PID_TRKR_PATHWAY                           |
| 18:40596271  | RIT2   | PID_TRKR_PATHWAY                           |
| 18:40612823  | RIT2   | PID_TRKR_PATHWAY                           |
| 18:40649778  | RIT2   | PID_TRKR_PATHWAY                           |
| 18:40673380  | RIT2   | PID_TRKR_PATHWAY                           |
| 3:49406095   | IP6K2  | PID_TXA2PATHWAY                            |
| 3:49424231   | IP6K2  | PID_TXA2PATHWAY                            |
| 3:49450137   | IP6K2  | PID_TXA2PATHWAY                            |
| 6:112009427  | FYN    | PID_TXA2PATHWAY                            |
| 6:112056759  | FYN    | PID_TXA2PATHWAY                            |
| 6:112151452  | FYN    | PID_TXA2PATHWAY                            |
| 8:11381148   | CTSB   | PID_TXA2PATHWAY                            |
| 19:3156505   | SPPL2B | PID_TXA2PATHWAY                            |
| 3:49406095   | IP6K2  | PID_VEGFR1_2_PATHWAY                       |
| 3:49424231   | IP6K2  | PID_VEGFR1_2_PATHWAY                       |
| 3:49450137   | IP6K2  | PID_VEGFR1_2_PATHWAY                       |
| 6:112009427  | FYN    | PID_VEGFR1_2_PATHWAY                       |
| 6:112056759  | FYN    | PID_VEGFR1_2_PATHWAY                       |
| 6:112151452  | FYN    | PID_VEGFR1_2_PATHWAY                       |
| 17:7129974   | V1NB1  | PID_WNT_CANONICAL_PATHWAY                  |
| 3:49406095   | IP6K2  | PID_WNT_NONCANONICAL_PATHWAY               |
| 3:49424231   | IP6K2  | PID_WNT_NONCANONICAL_PATHWAY               |
| 3:49450137   | IP6K2  | PID_WNT_NONCANONICAL_PATHWAY               |
| 17:7129974   | V1NB1  | PID_WNT_NONCANONICAL_PATHWAY               |
| 17:44843651  | WNT3   | PID_WNT_SIGNALING_PATHWAY                  |
| 17:44888209  | WNT3   | PID_WNT_SIGNALING_PATHWAY                  |
| 17:44888715  | WNT3   | PID_WNT_SIGNALING_PATHWAY                  |
| 17:44906949  | WNT3   | PID_WNT_SIGNALING_PATHWAY                  |
| 10:104847713 | GBF1   | REACTOME_ABACAVIR_METABOLISM               |
| 10:104861736 | GBF1   | REACTOME_ABACAVIR_METABOLISM               |
| 10:104926485 | GBF1   | REACTOME_ABACAVIR_METABOLISM               |
| 10:104929716 | GBF1   | REACTOME_ABACAVIR_METABOLISM               |
| 10:104847713 | GBF1   | REACTOME_ABACAVIR_TRANSPORT_AND_METABOLISM |
| 10:104861736 | GBF1   | REACTOME_ABACAVIR_TRANSPORT_AND_METABOLISM |
| 10:104926485 | GBF1   | REACTOME_ABACAVIR_TRANSPORT_AND_METABOLISM |

|              |                 |                                                                                       |
|--------------|-----------------|---------------------------------------------------------------------------------------|
| 10:104929716 | <i>GBF1</i>     | REACTOME_ABACAVIR_TRANSPORT_AND_METABOLISM                                            |
| 6:32151443   | <i>HLA-DRB5</i> | REACTOME_ABC_FAMILY_PROTEINS_MEDIATED_TRANSPORT                                       |
| 6:32814942   | <i>HLA-DRB5</i> | REACTOME_ABC_FAMILY_PROTEINS_MEDIATED_TRANSPORT                                       |
| 12:39960237  | <i>LRRK2_2</i>  | REACTOME_ABC_FAMILY_PROTEINS_MEDIATED_TRANSPORT                                       |
| 12:123453034 | <i>HIP1R</i>    | REACTOME_ABC_FAMILY_PROTEINS_MEDIATED_TRANSPORT                                       |
| 6:32151443   | <i>HLA-DRB5</i> | REACTOME_ABC_TRANSPORTER_DISORDERS                                                    |
| 6:32814942   | <i>HLA-DRB5</i> | REACTOME_ABC_TRANSPORTER_DISORDERS                                                    |
| 12:39960237  | <i>LRRK2_2</i>  | REACTOME_ABC_TRANSPORTERS_IN_LIPID_HOMEOSTASIS                                        |
| 6:31925679   | <i>HLA-DRB5</i> | REACTOME_ABORTIVE_ELONGATION_OF_HIV_1_TRANSCRIPT_IN_THE_ABSENCE_OF_TAT                |
| 19:3156505   | <i>SPPL2B</i>   | REACTOME_ACETYLCHOLINE_REGULATES_INSULIN_SECRETION                                    |
| 1:227067656  | <i>ITPKB</i>    | REACTOME_ACTIVATED_NOTCH1_TRANSMITS_SIGNAL_TO_THE_NUCLEUS                             |
| 12:41147295  | <i>LRRK2_2</i>  | REACTOME_ACTIVATED_NOTCH1_TRANSMITS_SIGNAL_TO_THE_NUCLEUS                             |
| 12:41251554  | <i>LRRK2_2</i>  | REACTOME_ACTIVATED_NOTCH1_TRANSMITS_SIGNAL_TO_THE_NUCLEUS                             |
| 12:41407403  | <i>LRRK2_2</i>  | REACTOME_ACTIVATED_NOTCH1_TRANSMITS_SIGNAL_TO_THE_NUCLEUS                             |
| 6:112009427  | <i>FYN</i>      | REACTOME_ACTIVATED_NTRK2_SIGNALS_THROUGH_FYN                                          |
| 6:112056759  | <i>FYN</i>      | REACTOME_ACTIVATED_NTRK2_SIGNALS_THROUGH_FYN                                          |
| 6:112151452  | <i>FYN</i>      | REACTOME_ACTIVATED_NTRK2_SIGNALS_THROUGH_FYN                                          |
| 16:50730088  | <i>CASC16</i>   | REACTOME_ACTIVATED_TAK1_MEDIATES_P38_MAPK_ACTIVATION                                  |
| 16:50730446  | <i>CASC16</i>   | REACTOME_ACTIVATED_TAK1_MEDIATES_P38_MAPK_ACTIVATION                                  |
| 16:50745926  | <i>CASC16</i>   | REACTOME_ACTIVATED_TAK1_MEDIATES_P38_MAPK_ACTIVATION                                  |
| 17:43999203  | <i>WNT3</i>     | REACTOME_ACTIVATION_OF_AMPK_DOWNSTREAM_OF_NMDARS                                      |
| 17:44005297  | <i>WNT3</i>     | REACTOME_ACTIVATION_OF_AMPK_DOWNSTREAM_OF_NMDARS                                      |
| 17:44019712  | <i>WNT3</i>     | REACTOME_ACTIVATION_OF_AMPK_DOWNSTREAM_OF_NMDARS                                      |
| 17:44060492  | <i>WNT3</i>     | REACTOME_ACTIVATION_OF_AMPK_DOWNSTREAM_OF_NMDARS                                      |
| 17:44065263  | <i>WNT3</i>     | REACTOME_ACTIVATION_OF_AMPK_DOWNSTREAM_OF_NMDARS                                      |
| 17:44081178  | <i>WNT3</i>     | REACTOME_ACTIVATION_OF_AMPK_DOWNSTREAM_OF_NMDARS                                      |
| 17:44083297  | <i>WNT3</i>     | REACTOME_ACTIVATION_OF_AMPK_DOWNSTREAM_OF_NMDARS                                      |
| 6:32814942   | <i>HLA-DRB5</i> | REACTOME_ACTIVATION_OF_APC_C_AND_APC_C:CDC20_MEDIATED_DEGRADATION_OF_MITOTIC_PROTEINS |
| 17:45215865  | <i>WNT3</i>     | REACTOME_ACTIVATION_OF_APC_C_AND_APC_C:CDC20_MEDIATED_DEGRADATION_OF_MITOTIC_PROTEINS |
| 17:45244822  | <i>WNT3</i>     | REACTOME_ACTIVATION_OF_APC_C_AND_APC_C:CDC20_MEDIATED_DEGRADATION_OF_MITOTIC_PROTEINS |
| 3:48199695   | <i>IP6K2</i>    | REACTOME_ACTIVATION_OF_ATR_IN_RESPONSE_TO_REPLICATION_STRESS                          |
| 3:48214438   | <i>IP6K2</i>    | REACTOME_ACTIVATION_OF_ATR_IN_RESPONSE_TO_REPLICATION_STRESS                          |
| 20:5934513   | <i>CRLS1</i>    | REACTOME_ACTIVATION_OF_ATR_IN_RESPONSE_TO_REPLICATION_STRESS                          |
| 20:5968737   | <i>CRLS1</i>    | REACTOME_ACTIVATION_OF_ATR_IN_RESPONSE_TO_REPLICATION_STRESS                          |
| 20:5968964   | <i>CRLS1</i>    | REACTOME_ACTIVATION_OF_ATR_IN_RESPONSE_TO_REPLICATION_STRESS                          |
| 17:7578671   | <i>V1NB1</i>    | REACTOME_ACTIVATION_OF_BH3_ONLY_PROTEINS                                              |
| 6:31897219   | <i>HLA-DRB5</i> | REACTOME_ACTIVATION_OF_C3_AND_C5                                                      |
| 17:7101771   | <i>V1NB1</i>    | REACTOME_ACTIVATION_OF_KAINATE_RECEPTORS_UPON_GLUTAMATE_BINDING                       |
| 6:32814942   | <i>HLA-DRB5</i> | REACTOME_ACTIVATION_OF_NF_KAPPAB_IN_B_CELLS                                           |
| 10:103185542 | <i>GBF1</i>     | REACTOME_ACTIVATION_OF_NF_KAPPAB_IN_B_CELLS                                           |
| 10:103308244 | <i>GBF1</i>     | REACTOME_ACTIVATION_OF_NF_KAPPAB_IN_B_CELLS                                           |
| 3:48835245   | <i>IP6K2</i>    | REACTOME_ACTIVATION_OF_NMDA_RECEPTORS_AND_POSTSYNAPTIC_EVENTS                         |
| 4:114424939  | <i>CAMK2D</i>   | REACTOME_ACTIVATION_OF_NMDA_RECEPTORS_AND_POSTSYNAPTIC_EVENTS                         |
| 11:83188607  | <i>DLG2</i>     | REACTOME_ACTIVATION_OF_NMDA_RECEPTORS_AND_POSTSYNAPTIC_EVENTS                         |
| 11:83219006  | <i>DLG2</i>     | REACTOME_ACTIVATION_OF_NMDA_RECEPTORS_AND_POSTSYNAPTIC_EVENTS                         |
| 11:83538733  | <i>DLG2</i>     | REACTOME_ACTIVATION_OF_NMDA_RECEPTORS_AND_POSTSYNAPTIC_EVENTS                         |
| 11:83544472  | <i>DLG2</i>     | REACTOME_ACTIVATION_OF_NMDA_RECEPTORS_AND_POSTSYNAPTIC_EVENTS                         |
| 11:83656201  | <i>DLG2</i>     | REACTOME_ACTIVATION_OF_NMDA_RECEPTORS_AND_POSTSYNAPTIC_EVENTS                         |
| 11:83700228  | <i>DLG2</i>     | REACTOME_ACTIVATION_OF_NMDA_RECEPTORS_AND_POSTSYNAPTIC_EVENTS                         |
| 11:83762918  | <i>DLG2</i>     | REACTOME_ACTIVATION_OF_NMDA_RECEPTORS_AND_POSTSYNAPTIC_EVENTS                         |
| 11:83894247  | <i>DLG2</i>     | REACTOME_ACTIVATION_OF_NMDA_RECEPTORS_AND_POSTSYNAPTIC_EVENTS                         |
| 11:84021037  | <i>DLG2</i>     | REACTOME_ACTIVATION_OF_NMDA_RECEPTORS_AND_POSTSYNAPTIC_EVENTS                         |
| 11:84324361  | <i>DLG2</i>     | REACTOME_ACTIVATION_OF_NMDA_RECEPTORS_AND_POSTSYNAPTIC_EVENTS                         |

|              |                     |                                                                                                         |
|--------------|---------------------|---------------------------------------------------------------------------------------------------------|
| 11:84373496  | <i>DLG2</i>         | REACTOME_ACTIVATION_OF_NMDA_RECEPTORS_AND_POSTSYNAPTIC_EVENTS                                           |
| 11:84403409  | <i>DLG2</i>         | REACTOME_ACTIVATION_OF_NMDA_RECEPTORS_AND_POSTSYNAPTIC_EVENTS                                           |
| 17:7101771   | <i>V1NB1</i>        | REACTOME_ACTIVATION_OF_NMDA_RECEPTORS_AND_POSTSYNAPTIC_EVENTS                                           |
| 17:43999203  | <i>WNT3</i>         | REACTOME_ACTIVATION_OF_NMDA_RECEPTORS_AND_POSTSYNAPTIC_EVENTS                                           |
| 17:44005297  | <i>WNT3</i>         | REACTOME_ACTIVATION_OF_NMDA_RECEPTORS_AND_POSTSYNAPTIC_EVENTS                                           |
| 17:44019712  | <i>WNT3</i>         | REACTOME_ACTIVATION_OF_NMDA_RECEPTORS_AND_POSTSYNAPTIC_EVENTS                                           |
| 17:44060492  | <i>WNT3</i>         | REACTOME_ACTIVATION_OF_NMDA_RECEPTORS_AND_POSTSYNAPTIC_EVENTS                                           |
| 17:44065263  | <i>WNT3</i>         | REACTOME_ACTIVATION_OF_NMDA_RECEPTORS_AND_POSTSYNAPTIC_EVENTS                                           |
| 17:44081178  | <i>WNT3</i>         | REACTOME_ACTIVATION_OF_NMDA_RECEPTORS_AND_POSTSYNAPTIC_EVENTS                                           |
| 17:44083297  | <i>WNT3</i>         | REACTOME_ACTIVATION_OF_NMDA_RECEPTORS_AND_POSTSYNAPTIC_EVENTS                                           |
| 17:7578671   | <i>V1NB1</i>        | REACTOME_ACTIVATION_OF_NOXA_AND_TRANSLOCATION_TO_MITOCHONDRIA                                           |
| 17:7578671   | <i>V1NB1</i>        | REACTOME_ACTIVATION_OF_PUMA_AND_TRANSLOCATION_TO_MITOCHONDRIA                                           |
| 17:7479140   | <i>V1NB1</i>        | REACTOME_ACTIVATION_OF_THE_MRNA_UPON_BINDING_OF_THE_CAP_BINDING_COMPLEX_AND_EIF5_AND_SUBSEQUENT_BINDING |
| 17:7480325   | <i>V1NB1</i>        | REACTOME_ACTIVATION_OF_THE_MRNA_UPON_BINDING_OF_THE_CAP_BINDING_COMPLEX_AND_EIF5_AND_SUBSEQUENT_BINDING |
| 12:133206648 | <i>FBRSL1</i>       | REACTOME_ACTIVATION_OF_THE_PRE_REPLICATIVE_COMPLEX                                                      |
| 12:133223685 | <i>FBRSL1</i>       | REACTOME_ACTIVATION_OF_THE_PRE_REPLICATIVE_COMPLEX                                                      |
| 12:133225045 | <i>FBRSL1</i>       | REACTOME_ACTIVATION_OF_THE_PRE_REPLICATIVE_COMPLEX                                                      |
| 20:5934513   | <i>CRLS1</i>        | REACTOME_ACTIVATION_OF_THE_PRE_REPLICATIVE_COMPLEX                                                      |
| 20:5968737   | <i>CRLS1</i>        | REACTOME_ACTIVATION_OF_THE_PRE_REPLICATIVE_COMPLEX                                                      |
| 20:5968964   | <i>CRLS1</i>        | REACTOME_ACTIVATION_OF_THE_PRE_REPLICATIVE_COMPLEX                                                      |
| 20:6011934   | <i>CRLS1</i>        | REACTOME_ACTIVATION_OF_THE_PRE_REPLICATIVE_COMPLEX                                                      |
|              |                     | REACTOME_ACYL_CHAIN_REMODELLING_OF_PG                                                                   |
| 1:171945488  | <i>VAMP4</i>        | REACTOME_ADAPTIVE_IMMUNE_SYSTEM                                                                         |
| 1:172137119  | <i>VAMP4</i>        | REACTOME_ADAPTIVE_IMMUNE_SYSTEM                                                                         |
| 1:172386261  | <i>VAMP4</i>        | REACTOME_ADAPTIVE_IMMUNE_SYSTEM                                                                         |
| 3:49740895   | <i>IP6K2</i>        | REACTOME_ADAPTIVE_IMMUNE_SYSTEM                                                                         |
| 3:121324643  | <i>KPNA1</i>        | REACTOME_ADAPTIVE_IMMUNE_SYSTEM                                                                         |
| 3:121340955  | <i>KPNA1</i>        | REACTOME_ADAPTIVE_IMMUNE_SYSTEM                                                                         |
| 3:122289921  | <i>KPNA1</i>        | REACTOME_ADAPTIVE_IMMUNE_SYSTEM                                                                         |
| 4:15608677   | <i>BST1</i>         | REACTOME_ADAPTIVE_IMMUNE_SYSTEM                                                                         |
| 4:170015977  | <i>CLCN3</i>        | REACTOME_ADAPTIVE_IMMUNE_SYSTEM                                                                         |
| 5:133710339  | <i>C5orf24</i>      | REACTOME_ADAPTIVE_IMMUNE_SYSTEM                                                                         |
| 6:29798642   | <i>TRIM40</i>       | REACTOME_ADAPTIVE_IMMUNE_SYSTEM                                                                         |
| 6:32362318   | <i>HLA-DRB5</i>     | REACTOME_ADAPTIVE_IMMUNE_SYSTEM                                                                         |
| 6:32602372   | <i>HLA-DRB5</i>     | REACTOME_ADAPTIVE_IMMUNE_SYSTEM                                                                         |
| 6:32789400   | <i>HLA-DRB5</i>     | REACTOME_ADAPTIVE_IMMUNE_SYSTEM                                                                         |
| 6:32791831   | <i>HLA-DRB5</i>     | REACTOME_ADAPTIVE_IMMUNE_SYSTEM                                                                         |
| 6:32797361   | <i>HLA-DRB5</i>     | REACTOME_ADAPTIVE_IMMUNE_SYSTEM                                                                         |
| 6:32802462   | <i>HLA-DRB5</i>     | REACTOME_ADAPTIVE_IMMUNE_SYSTEM                                                                         |
| 6:32814942   | <i>HLA-DRB5</i>     | REACTOME_ADAPTIVE_IMMUNE_SYSTEM                                                                         |
| 6:32930679   | <i>HLA-DRB5</i>     | REACTOME_ADAPTIVE_IMMUNE_SYSTEM                                                                         |
| 6:32934409   | <i>HLA-DRB5</i>     | REACTOME_ADAPTIVE_IMMUNE_SYSTEM                                                                         |
| 6:32973303   | <i>HLA-DRB5</i>     | REACTOME_ADAPTIVE_IMMUNE_SYSTEM                                                                         |
| 6:32974268   | <i>HLA-DRB5</i>     | REACTOME_ADAPTIVE_IMMUNE_SYSTEM                                                                         |
| 6:112009427  | <i>FYN</i>          | REACTOME_ADAPTIVE_IMMUNE_SYSTEM                                                                         |
| 6:112056759  | <i>FYN</i>          | REACTOME_ADAPTIVE_IMMUNE_SYSTEM                                                                         |
| 6:112151452  | <i>FYN</i>          | REACTOME_ADAPTIVE_IMMUNE_SYSTEM                                                                         |
| 7:66096028   | <i>GS1-124K5.11</i> | REACTOME_ADAPTIVE_IMMUNE_SYSTEM                                                                         |
| 8:11381148   | <i>CTSB</i>         | REACTOME_ADAPTIVE_IMMUNE_SYSTEM                                                                         |
| 8:11712443   | <i>CTSB</i>         | REACTOME_ADAPTIVE_IMMUNE_SYSTEM                                                                         |
| 8:12580949   | <i>CTSB</i>         | REACTOME_ADAPTIVE_IMMUNE_SYSTEM                                                                         |
| 9:17579690   | <i>SH3GL2_2</i>     | REACTOME_ADAPTIVE_IMMUNE_SYSTEM                                                                         |
| 9:17609302   | <i>SH3GL2_2</i>     | REACTOME_ADAPTIVE_IMMUNE_SYSTEM                                                                         |
| 9:17627444   | <i>SH3GL2_2</i>     | REACTOME_ADAPTIVE_IMMUNE_SYSTEM                                                                         |

|              |          |                                                                                           |
|--------------|----------|-------------------------------------------------------------------------------------------|
| 9:17710876   | SH3GL2_2 | REACTOME_ADAPTIVE_IMMUNE_SYSTEM                                                           |
| 9:17732590   | SH3GL2_2 | REACTOME_ADAPTIVE_IMMUNE_SYSTEM                                                           |
| 9:17737514   | SH3GL2_2 | REACTOME_ADAPTIVE_IMMUNE_SYSTEM                                                           |
| 9:17758945   | SH3GL2_2 | REACTOME_ADAPTIVE_IMMUNE_SYSTEM                                                           |
| 9:33845203   | UBAP2    | REACTOME_ADAPTIVE_IMMUNE_SYSTEM                                                           |
| 10:103185542 | GBF1     | REACTOME_ADAPTIVE_IMMUNE_SYSTEM                                                           |
| 10:103308244 | GBF1     | REACTOME_ADAPTIVE_IMMUNE_SYSTEM                                                           |
| 10:104258303 | GBF1     | REACTOME_ADAPTIVE_IMMUNE_SYSTEM                                                           |
| 16:30510571  | SETD1A   | REACTOME_ADAPTIVE_IMMUNE_SYSTEM                                                           |
| 16:30516492  | SETD1A   | REACTOME_ADAPTIVE_IMMUNE_SYSTEM                                                           |
| 16:30520856  | SETD1A   | REACTOME_ADAPTIVE_IMMUNE_SYSTEM                                                           |
| 17:43390763  | CRHR1_2  | REACTOME_ADAPTIVE_IMMUNE_SYSTEM                                                           |
| 17:45215865  | WNT3     | REACTOME_ADAPTIVE_IMMUNE_SYSTEM                                                           |
| 17:45244822  | WNT3     | REACTOME_ADAPTIVE_IMMUNE_SYSTEM                                                           |
| 3:123057397  | KPNA1    | REACTOME_ADENYLATE_CYCLASE_ACTIVATING_PATHWAY                                             |
| 3:123057397  | KPNA1    | REACTOME_ADENYLATE_CYCLASE_INHIBITORY_PATHWAY                                             |
| 17:39883520  | RETREG3  | REACTOME_ADHERENS_JUNCTIONS_INTERACTIONS                                                  |
| 3:151090424  | MED12L   | REACTOME_ADP_SIGNALLING_THROUGH_P2Y_PURINOCEPTOR_12                                       |
| 3:151099733  | MED12L   | REACTOME_ADP_SIGNALLING_THROUGH_P2Y_PURINOCEPTOR_12                                       |
| 19:3156505   | SPPL2B   | REACTOME_ADP_SIGNALLING_THROUGH_P2Y_PURINOCEPTOR_1                                        |
| 3:123057397  | KPNA1    | REACTOME_ADRENALINE_NORADRENALINE_INHIBITS_INSULIN_SECRETION                              |
| 6:32151443   | HLA-DRB5 | REACTOME_ADVANCED_GLYCOSYLATION_ENDPRODUCT_RECEPTOR_SIGNALING                             |
| 9:33791164   | UBAP2    | REACTOME_ALPHA_DEFENSINS                                                                  |
| 6:31897219   | HLA-DRB5 | REACTOME_ALTERNATIVE_COMPLEMENT_ACTIVATION                                                |
| 8:17427186   | FGF20    | REACTOME_AMINO_ACID_TRANSPORT_ACROSS_THE_PLASMA_MEMBRANE                                  |
| 12:47192323  | SCAF11   | REACTOME_AMINO_ACID_TRANSPORT_ACROSS_THE_PLASMA_MEMBRANE                                  |
| 4:90677243   | SNCA_2   | REACTOME_AMYLOID_FIBER_FORMATION                                                          |
| 4:90700329   | SNCA_2   | REACTOME_AMYLOID_FIBER_FORMATION                                                          |
| 4:90727315   | SNCA_2   | REACTOME_AMYLOID_FIBER_FORMATION                                                          |
| 4:90738839   | SNCA_2   | REACTOME_AMYLOID_FIBER_FORMATION                                                          |
| 4:90757294   | SNCA_2   | REACTOME_AMYLOID_FIBER_FORMATION                                                          |
| 3:121553904  | KPNA1    | REACTOME_ANCHORING_OF_THE_BASAL_BODY_TO_THE_PLASMA_MEMBRANE                               |
| 4:15492268   | BST1     | REACTOME_ANCHORING_OF_THE_BASAL_BODY_TO_THE_PLASMA_MEMBRANE                               |
| 4:15547513   | BST1     | REACTOME_ANCHORING_OF_THE_BASAL_BODY_TO_THE_PLASMA_MEMBRANE                               |
| 4:15554219   | BST1     | REACTOME_ANCHORING_OF_THE_BASAL_BODY_TO_THE_PLASMA_MEMBRANE                               |
| 10:104258303 | GBF1     | REACTOME_ANCHORING_OF_THE_BASAL_BODY_TO_THE_PLASMA_MEMBRANE                               |
| 10:104591639 | GBF1     | REACTOME_ANDROGEN_BIOSYNTHESIS                                                            |
| 6:112009427  | FYN      | REACTOME_ANTIGEN_ACTIVATES_B_CELL_RECEPTOR_BCR_LEADING_TO_GENERATION_OF_SECOND_MESSENGERS |
| 6:112056759  | FYN      | REACTOME_ANTIGEN_ACTIVATES_B_CELL_RECEPTOR_BCR_LEADING_TO_GENERATION_OF_SECOND_MESSENGERS |
| 6:112151452  | FYN      | REACTOME_ANTIGEN_ACTIVATES_B_CELL_RECEPTOR_BCR_LEADING_TO_GENERATION_OF_SECOND_MESSENGERS |
| 8:11381148   | CTSB     | REACTOME_ANTIGEN_ACTIVATES_B_CELL_RECEPTOR_BCR_LEADING_TO_GENERATION_OF_SECOND_MESSENGERS |
| 6:29798642   | TRIM40   | REACTOME_ANTIGEN_PRESENTATION: FOLDING_ASSEMBLY_AND_PEPTIDE_LOADING_OF_CLASS_I_MHC        |
| 6:32789400   | HLA-DRB5 | REACTOME_ANTIGEN_PRESENTATION: FOLDING_ASSEMBLY_AND_PEPTIDE_LOADING_OF_CLASS_I_MHC        |
| 6:32791831   | HLA-DRB5 | REACTOME_ANTIGEN_PRESENTATION: FOLDING_ASSEMBLY_AND_PEPTIDE_LOADING_OF_CLASS_I_MHC        |
| 6:32797361   | HLA-DRB5 | REACTOME_ANTIGEN_PRESENTATION: FOLDING_ASSEMBLY_AND_PEPTIDE_LOADING_OF_CLASS_I_MHC        |
| 6:32802462   | HLA-DRB5 | REACTOME_ANTIGEN_PRESENTATION: FOLDING_ASSEMBLY_AND_PEPTIDE_LOADING_OF_CLASS_I_MHC        |
| 6:32814942   | HLA-DRB5 | REACTOME_ANTIGEN_PRESENTATION: FOLDING_ASSEMBLY_AND_PEPTIDE_LOADING_OF_CLASS_I_MHC        |
| 6:29798642   | TRIM40   | REACTOME_ANTIGEN_PROCESSING_CROSS_PRESENTATION                                            |
| 6:32789400   | HLA-DRB5 | REACTOME_ANTIGEN_PROCESSING_CROSS_PRESENTATION                                            |
| 6:32791831   | HLA-DRB5 | REACTOME_ANTIGEN_PROCESSING_CROSS_PRESENTATION                                            |
| 6:32797361   | HLA-DRB5 | REACTOME_ANTIGEN_PROCESSING_CROSS_PRESENTATION                                            |
| 6:32802462   | HLA-DRB5 | REACTOME_ANTIGEN_PROCESSING_CROSS_PRESENTATION                                            |
| 6:32814942   | HLA-DRB5 | REACTOME_ANTIGEN_PROCESSING_CROSS_PRESENTATION                                            |

|              |                     |                                                                                                    |
|--------------|---------------------|----------------------------------------------------------------------------------------------------|
| 3:49740895   | <i>IP6K2</i>        | REACTOME_ANTIGEN_PROCESSING:_UBIQUITINATION_PROTEASOME_DEGRADATION                                 |
| 3:121324643  | <i>KPNA1</i>        | REACTOME_ANTIGEN_PROCESSING:_UBIQUITINATION_PROTEASOME_DEGRADATION                                 |
| 3:121340955  | <i>KPNA1</i>        | REACTOME_ANTIGEN_PROCESSING:_UBIQUITINATION_PROTEASOME_DEGRADATION                                 |
| 3:122289921  | <i>KPNA1</i>        | REACTOME_ANTIGEN_PROCESSING:_UBIQUITINATION_PROTEASOME_DEGRADATION                                 |
| 4:15608677   | <i>BST1</i>         | REACTOME_ANTIGEN_PROCESSING:_UBIQUITINATION_PROTEASOME_DEGRADATION                                 |
| 4:170015977  | <i>CLCN3</i>        | REACTOME_ANTIGEN_PROCESSING:_UBIQUITINATION_PROTEASOME_DEGRADATION                                 |
| 5:133710339  | <i>C5orf24</i>      | REACTOME_ANTIGEN_PROCESSING:_UBIQUITINATION_PROTEASOME_DEGRADATION                                 |
| 6:32814942   | <i>HLA-DRB5</i>     | REACTOME_ANTIGEN_PROCESSING:_UBIQUITINATION_PROTEASOME_DEGRADATION                                 |
| 7:66096028   | <i>GS1-124K5.11</i> | REACTOME_ANTIGEN_PROCESSING:_UBIQUITINATION_PROTEASOME_DEGRADATION                                 |
| 8:12580949   | <i>CTSB</i>         | REACTOME_ANTIGEN_PROCESSING:_UBIQUITINATION_PROTEASOME_DEGRADATION                                 |
| 9:33845203   | <i>UBAP2</i>        | REACTOME_ANTIGEN_PROCESSING:_UBIQUITINATION_PROTEASOME_DEGRADATION                                 |
| 10:103185542 | <i>GBF1</i>         | REACTOME_ANTIGEN_PROCESSING:_UBIQUITINATION_PROTEASOME_DEGRADATION                                 |
| 10:103308244 | <i>GBF1</i>         | REACTOME_ANTIGEN_PROCESSING:_UBIQUITINATION_PROTEASOME_DEGRADATION                                 |
| 17:45215865  | <i>WNT3</i>         | REACTOME_ANTIGEN_PROCESSING:_UBIQUITINATION_PROTEASOME_DEGRADATION                                 |
| 17:45244822  | <i>WNT3</i>         | REACTOME_ANTIGEN_PROCESSING:_UBIQUITINATION_PROTEASOME_DEGRADATION                                 |
| 9:33791164   | <i>UBAP2</i>        | REACTOME_ANTIMICROBIAL_PEPTIDES                                                                    |
| 17:7479140   | <i>V1NB1</i>        | REACTOME_ANTIVIRAL_MECHANISM_BY_IFN_STIMULATED_GENES                                               |
| 17:7480325   | <i>V1NB1</i>        | REACTOME_ANTIVIRAL_MECHANISM_BY_IFN_STIMULATED_GENES                                               |
| 17:45215865  | <i>WNT3</i>         | REACTOME_APC_C:CDC20_MEDIATED_DEGRADATION_OF_CYCLIN_B                                              |
| 17:45244822  | <i>WNT3</i>         | REACTOME_APC_C:CDC20_MEDIATED_DEGRADATION_OF_CYCLIN_B                                              |
| 6:32814942   | <i>HLA-DRB5</i>     | ME_APC_C:CDH1_MEDIATED_DEGRADATION_OF_CDC20_AND_OTHER_APC_C:CDH1_TARGETED_PROTEINS_IN_LATE_MITOSIS |
| 17:45215865  | <i>WNT3</i>         | ME_APC_C:CDH1_MEDIATED_DEGRADATION_OF_CDC20_AND_OTHER_APC_C:CDH1_TARGETED_PROTEINS_IN_LATE_MITOSIS |
| 17:45244822  | <i>WNT3</i>         | ME_APC_C:CDH1_MEDIATED_DEGRADATION_OF_CDC20_AND_OTHER_APC_C:CDH1_TARGETED_PROTEINS_IN_LATE_MITOSIS |
| 17:45215865  | <i>WNT3</i>         | REACTOME_APC_CDC20_MEDIATED_DEGRADATION_OF_NEK2A                                                   |
| 17:45244822  | <i>WNT3</i>         | REACTOME_APC_CDC20_MEDIATED_DEGRADATION_OF_NEK2A                                                   |
| 1:156059276  | <i>GBAP1</i>        | REACTOME_APOPTOTIC_CLEAVAGE_OF_CELLULAR_PROTEINS                                                   |
| 17:43999203  | <i>WNT3</i>         | REACTOME_APOPTOTIC_CLEAVAGE_OF_CELLULAR_PROTEINS                                                   |
| 17:44005297  | <i>WNT3</i>         | REACTOME_APOPTOTIC_CLEAVAGE_OF_CELLULAR_PROTEINS                                                   |
| 17:44019712  | <i>WNT3</i>         | REACTOME_APOPTOTIC_CLEAVAGE_OF_CELLULAR_PROTEINS                                                   |
| 17:44060492  | <i>WNT3</i>         | REACTOME_APOPTOTIC_CLEAVAGE_OF_CELLULAR_PROTEINS                                                   |
| 17:44065263  | <i>WNT3</i>         | REACTOME_APOPTOTIC_CLEAVAGE_OF_CELLULAR_PROTEINS                                                   |
| 17:44081178  | <i>WNT3</i>         | REACTOME_APOPTOTIC_CLEAVAGE_OF_CELLULAR_PROTEINS                                                   |
| 17:44083297  | <i>WNT3</i>         | REACTOME_APOPTOTIC_CLEAVAGE_OF_CELLULAR_PROTEINS                                                   |
| 1:156059276  | <i>GBAP1</i>        | REACTOME_APOPTOTIC_EXECUTION_PHASE                                                                 |
| 17:43999203  | <i>WNT3</i>         | REACTOME_APOPTOTIC_EXECUTION_PHASE                                                                 |
| 17:44005297  | <i>WNT3</i>         | REACTOME_APOPTOTIC_EXECUTION_PHASE                                                                 |
| 17:44019712  | <i>WNT3</i>         | REACTOME_APOPTOTIC_EXECUTION_PHASE                                                                 |
| 17:44060492  | <i>WNT3</i>         | REACTOME_APOPTOTIC_EXECUTION_PHASE                                                                 |
| 17:44065263  | <i>WNT3</i>         | REACTOME_APOPTOTIC_EXECUTION_PHASE                                                                 |
| 17:44081178  | <i>WNT3</i>         | REACTOME_APOPTOTIC_EXECUTION_PHASE                                                                 |
| 17:44083297  | <i>WNT3</i>         | REACTOME_APOPTOTIC_EXECUTION_PHASE                                                                 |
| 3:48835245   | <i>IP6K2</i>        | REACTOME_AQUAPORIN_MEDIATED_TRANSPORT                                                              |
| 3:123057397  | <i>KPNA1</i>        | REACTOME_AQUAPORIN_MEDIATED_TRANSPORT                                                              |
| 17:7983799   | <i>V1NB1</i>        | REACTOME_ARACHIDONIC_ACID_METABOLISM                                                               |
| 17:8019125   | <i>V1NB1</i>        | REACTOME_ARACHIDONIC_ACID_METABOLISM                                                               |
| 2:134977261  | <i>TMEM163</i>      | REACTOME_ASPARAGINE_N_LINKED_GLYCOSYLATION                                                         |
| 2:135194840  | <i>TMEM163</i>      | REACTOME_ASPARAGINE_N_LINKED_GLYCOSYLATION                                                         |
| 2:135202455  | <i>TMEM163</i>      | REACTOME_ASPARAGINE_N_LINKED_GLYCOSYLATION                                                         |
| 3:121411876  | <i>KPNA1</i>        | REACTOME_ASPARAGINE_N_LINKED_GLYCOSYLATION                                                         |
| 3:121412702  | <i>KPNA1</i>        | REACTOME_ASPARAGINE_N_LINKED_GLYCOSYLATION                                                         |
| 4:76695927   | <i>FAM47E-STBD1</i> | REACTOME_ASPARAGINE_N_LINKED_GLYCOSYLATION                                                         |
| 4:113938109  | <i>CAMK2D</i>       | REACTOME_ASPARAGINE_N_LINKED_GLYCOSYLATION                                                         |
| 4:114077386  | <i>CAMK2D</i>       | REACTOME_ASPARAGINE_N_LINKED_GLYCOSYLATION                                                         |

|              |                 |                                                                           |
|--------------|-----------------|---------------------------------------------------------------------------|
| 4:114217997  | <i>CAMK2D</i>   | REACTOME_ASPARAGINE_N_LINKED_GLYCOSYLATION                                |
| 6:32151443   | <i>HLA-DRB5</i> | REACTOME_ASPARAGINE_N_LINKED_GLYCOSYLATION                                |
| 10:104005410 | <i>GBF1</i>     | REACTOME_ASPARAGINE_N_LINKED_GLYCOSYLATION                                |
| 10:104034550 | <i>GBF1</i>     | REACTOME_ASPARAGINE_N_LINKED_GLYCOSYLATION                                |
| 10:104258303 | <i>GBF1</i>     | REACTOME_ASPARAGINE_N_LINKED_GLYCOSYLATION                                |
| 10:121683206 | <i>INPP5F</i>   | REACTOME_ASPARAGINE_N_LINKED_GLYCOSYLATION                                |
| 10:121686714 | <i>INPP5F</i>   | REACTOME_ASPARAGINE_N_LINKED_GLYCOSYLATION                                |
| 10:121689030 | <i>INPP5F</i>   | REACTOME_ASPARAGINE_N_LINKED_GLYCOSYLATION                                |
| 17:7491546   | <i>V1NB1</i>    | REACTOME_ASPARAGINE_N_LINKED_GLYCOSYLATION                                |
| 17:44800946  | <i>WNT3</i>     | REACTOME_ASPARAGINE_N_LINKED_GLYCOSYLATION                                |
| 17:44833217  | <i>WNT3</i>     | REACTOME_ASPARAGINE_N_LINKED_GLYCOSYLATION                                |
| 17:45059032  | <i>WNT3</i>     | REACTOME_ASPARAGINE_N_LINKED_GLYCOSYLATION                                |
| 17:45089680  | <i>WNT3</i>     | REACTOME_ASPARAGINE_N_LINKED_GLYCOSYLATION                                |
| 4:114424939  | <i>CAMK2D</i>   | REACTOME_ASSEMBLY_AND_CELL_SURFACE_PRESENTATION_OF_NMDA_RECEPTORS         |
| 11:83188607  | <i>DLG2</i>     | REACTOME_ASSEMBLY_AND_CELL_SURFACE_PRESENTATION_OF_NMDA_RECEPTORS         |
| 11:83219006  | <i>DLG2</i>     | REACTOME_ASSEMBLY_AND_CELL_SURFACE_PRESENTATION_OF_NMDA_RECEPTORS         |
| 11:83538733  | <i>DLG2</i>     | REACTOME_ASSEMBLY_AND_CELL_SURFACE_PRESENTATION_OF_NMDA_RECEPTORS         |
| 11:83544472  | <i>DLG2</i>     | REACTOME_ASSEMBLY_AND_CELL_SURFACE_PRESENTATION_OF_NMDA_RECEPTORS         |
| 11:83656201  | <i>DLG2</i>     | REACTOME_ASSEMBLY_AND_CELL_SURFACE_PRESENTATION_OF_NMDA_RECEPTORS         |
| 11:83700228  | <i>DLG2</i>     | REACTOME_ASSEMBLY_AND_CELL_SURFACE_PRESENTATION_OF_NMDA_RECEPTORS         |
| 11:83762918  | <i>DLG2</i>     | REACTOME_ASSEMBLY_AND_CELL_SURFACE_PRESENTATION_OF_NMDA_RECEPTORS         |
| 11:83894247  | <i>DLG2</i>     | REACTOME_ASSEMBLY_AND_CELL_SURFACE_PRESENTATION_OF_NMDA_RECEPTORS         |
| 11:84021037  | <i>DLG2</i>     | REACTOME_ASSEMBLY_AND_CELL_SURFACE_PRESENTATION_OF_NMDA_RECEPTORS         |
| 11:84324361  | <i>DLG2</i>     | REACTOME_ASSEMBLY_AND_CELL_SURFACE_PRESENTATION_OF_NMDA_RECEPTORS         |
| 11:84373496  | <i>DLG2</i>     | REACTOME_ASSEMBLY_AND_CELL_SURFACE_PRESENTATION_OF_NMDA_RECEPTORS         |
| 11:84403409  | <i>DLG2</i>     | REACTOME_ASSEMBLY_AND_CELL_SURFACE_PRESENTATION_OF_NMDA_RECEPTORS         |
| 17:7101771   | <i>V1NB1</i>    | REACTOME_ASSEMBLY_AND_CELL_SURFACE_PRESENTATION_OF_NMDA_RECEPTORS         |
| 6:33153528   | <i>HLA-DRB5</i> | REACTOME_ASSEMBLY_OF_COLLAGEN_FIBRILS_AND_OTHER_MULTIMERIC_STRUCTURES     |
| 8:11712443   | <i>CTSB</i>     | REACTOME_ASSEMBLY_OF_COLLAGEN_FIBRILS_AND_OTHER_MULTIMERIC_STRUCTURES     |
| 8:23190941   | <i>BIN3</i>     | REACTOME_ASSEMBLY_OF_COLLAGEN_FIBRILS_AND_OTHER_MULTIMERIC_STRUCTURES     |
| 8:23212542   | <i>BIN3</i>     | REACTOME_ASSEMBLY_OF_COLLAGEN_FIBRILS_AND_OTHER_MULTIMERIC_STRUCTURES     |
| 8:23223713   | <i>BIN3</i>     | REACTOME_ASSEMBLY_OF_COLLAGEN_FIBRILS_AND_OTHER_MULTIMERIC_STRUCTURES     |
| 8:17125768   | <i>FGF20</i>    | REACTOME_ASSEMBLY_OF_THE_HIV_VIRION                                       |
| 10:15199347  | <i>ITGA8</i>    | REACTOME_ASSEMBLY_OF_THE_HIV_VIRION                                       |
| 6:32814942   | <i>HLA-DRB5</i> | REACTOME_ASSEMBLY_OF_THE_PRE_REPLICATIVE_COMPLEX                          |
| 20:5934513   | <i>CRLS1</i>    | REACTOME_ASSEMBLY_OF_THE_PRE_REPLICATIVE_COMPLEX                          |
| 20:5968737   | <i>CRLS1</i>    | REACTOME_ASSEMBLY_OF_THE_PRE_REPLICATIVE_COMPLEX                          |
| 20:5968964   | <i>CRLS1</i>    | REACTOME_ASSEMBLY_OF_THE_PRE_REPLICATIVE_COMPLEX                          |
| 4:15608677   | <i>BST1</i>     | REACTOME_ASSOCIATION_OF_TRIC_CCT_WITH_TARGET_PROTEINS_DURING_BIOSYNTHESIS |
| 6:32814942   | <i>HLA-DRB5</i> | REACTOME_ASYMMETRIC_LOCALIZATION_OF_PCP_PROTEINS                          |
| 17:7129974   | <i>V1NB1</i>    | REACTOME_ASYMMETRIC_LOCALIZATION_OF_PCP_PROTEINS                          |
| 6:71594785   | <i>RIMS1</i>    | REACTOME_A_TETRASACCHARIDE_LINKER_SEQUENCE_IS_REQUIRED_FOR_GAG_SYNTHESIS  |
| 1:161875645  | <i>FCGR2A</i>   | REACTOME_ATF4_ACTIVATES_GENES_IN_RESPONSE_TO_ENDOPLASMIC_RETICULUM_STRESS |
| 1:161930954  | <i>FCGR2A</i>   | REACTOME_ATF4_ACTIVATES_GENES_IN_RESPONSE_TO_ENDOPLASMIC_RETICULUM_STRESS |
| 1:161875645  | <i>FCGR2A</i>   | REACTOME_ATF6_ATF6_ALPHA_ACTIVATES_CHAPERONE_GENES                        |
| 1:161930954  | <i>FCGR2A</i>   | REACTOME_ATF6_ATF6_ALPHA_ACTIVATES_CHAPERONE_GENES                        |
| 1:161875645  | <i>FCGR2A</i>   | REACTOME_ATF6_ATF6_ALPHA_ACTIVATES_CHAPERONES                             |
| 1:161930954  | <i>FCGR2A</i>   | REACTOME_ATF6_ATF6_ALPHA_ACTIVATES_CHAPERONES                             |
| 6:32814942   | <i>HLA-DRB5</i> | REACTOME_AUF1_HNRNP_D0_BINDS_AND_DESTABILIZES_MRNA                        |
| 10:104258303 | <i>GBF1</i>     | REACTOME_AURKA_ACTIVATION_BY_TPX2                                         |
| 8:17125768   | <i>FGF20</i>    | REACTOME_AUTOPHAGY                                                        |
| 12:133295501 | <i>FBRSL1</i>   | REACTOME_AUTOPHAGY                                                        |
| 1:171945488  | <i>VAMP4</i>    | REACTOME_AXON_GUIDANCE                                                    |

|              |              |                                                                                                     |
|--------------|--------------|-----------------------------------------------------------------------------------------------------|
| 1:172137119  | VAMP4        | REACTOME_AXON_GUIDANCE                                                                              |
| 1:172386261  | VAMP4        | REACTOME_AXON_GUIDANCE                                                                              |
| 1:227067656  | ITPKB        | REACTOME_AXON_GUIDANCE                                                                              |
| 3:48835245   | IP6K2        | REACTOME_AXON_GUIDANCE                                                                              |
| 3:49406095   | IP6K2        | REACTOME_AXON_GUIDANCE                                                                              |
| 3:49424231   | IP6K2        | REACTOME_AXON_GUIDANCE                                                                              |
| 3:49450137   | IP6K2        | REACTOME_AXON_GUIDANCE                                                                              |
| 3:49561208   | IP6K2        | REACTOME_AXON_GUIDANCE                                                                              |
| 4:113938109  | CAMK2D       | REACTOME_AXON_GUIDANCE                                                                              |
| 4:114077386  | CAMK2D       | REACTOME_AXON_GUIDANCE                                                                              |
| 4:114217997  | CAMK2D       | REACTOME_AXON_GUIDANCE                                                                              |
| 6:32814942   | HLA-DRB5     | REACTOME_AXON_GUIDANCE                                                                              |
| 6:112009427  | FYN          | REACTOME_AXON_GUIDANCE                                                                              |
| 6:112056759  | FYN          | REACTOME_AXON_GUIDANCE                                                                              |
| 6:112151452  | FYN          | REACTOME_AXON_GUIDANCE                                                                              |
| 8:21665306   | BIN3         | REACTOME_AXON_GUIDANCE                                                                              |
| 8:21668901   | BIN3         | REACTOME_AXON_GUIDANCE                                                                              |
| 9:17579690   | SH3GL2_2     | REACTOME_AXON_GUIDANCE                                                                              |
| 9:17609302   | SH3GL2_2     | REACTOME_AXON_GUIDANCE                                                                              |
| 9:17627444   | SH3GL2_2     | REACTOME_AXON_GUIDANCE                                                                              |
| 9:17710876   | SH3GL2_2     | REACTOME_AXON_GUIDANCE                                                                              |
| 9:17732590   | SH3GL2_2     | REACTOME_AXON_GUIDANCE                                                                              |
| 9:17737514   | SH3GL2_2     | REACTOME_AXON_GUIDANCE                                                                              |
| 9:17758945   | SH3GL2_2     | REACTOME_AXON_GUIDANCE                                                                              |
| 12:41147295  | LRRK2_2      | REACTOME_AXON_GUIDANCE                                                                              |
| 12:41251554  | LRRK2_2      | REACTOME_AXON_GUIDANCE                                                                              |
| 12:41407403  | LRRK2_2      | REACTOME_AXON_GUIDANCE                                                                              |
| 17:7101771   | V1NB1        | REACTOME_AXON_GUIDANCE                                                                              |
| 12:133206648 | FBRSL1       | REACTOME_BASE_EXCISION_REPAIR                                                                       |
| 12:133223685 | FBRSL1       | REACTOME_BASE_EXCISION_REPAIR                                                                       |
| 12:133225045 | FBRSL1       | REACTOME_BASE_EXCISION_REPAIR                                                                       |
| 17:7560294   | V1NB1        | REACTOME_BASIGIN_INTERACTIONS                                                                       |
| 3:49406095   | IP6K2        | REACTOME_BETA_CATENIN_INDEPENDENT_WNT_SIGNALING                                                     |
| 3:49424231   | IP6K2        | REACTOME_BETA_CATENIN_INDEPENDENT_WNT_SIGNALING                                                     |
| 3:49450137   | IP6K2        | REACTOME_BETA_CATENIN_INDEPENDENT_WNT_SIGNALING                                                     |
| 6:32814942   | HLA-DRB5     | REACTOME_BETA_CATENIN_INDEPENDENT_WNT_SIGNALING                                                     |
| 17:7129974   | V1NB1        | REACTOME_BETA_CATENIN_INDEPENDENT_WNT_SIGNALING                                                     |
| 17:42338993  | FAM171A2     | REACTOME_BICARBONATE_TRANSPORTERS                                                                   |
| 16:30999462  | SETD1A       | REACTOME_BILE_ACID_AND_BILE_SALT_METABOLISM                                                         |
| 7:65705034   | GS1-124K5.11 | REACTOME_BIOLOGICAL_OXIDATIONS                                                                      |
| 10:104635620 | GBF1         | REACTOME_BIOLOGICAL_OXIDATIONS                                                                      |
| 17:7491546   | V1NB1        | OSYNTHESIS_OF_THE_N_GLYCAN_PRECURSOR_DOLICHOL_LIPID_LINKED_OLIGOSACCHARIDE_LLO_AND_TRANSFER_TO_A_NA |
| 3:182760073  | MCCC1        | REACTOME_BIOTIN_TRANSPORT_AND_METABOLISM                                                            |
| 21:38328886  | DYRK1A       | REACTOME_BIOTIN_TRANSPORT_AND_METABOLISM                                                            |
| 6:33252561   | HLA-DRB5     | REACTOME_BLOOD_GROUP_SYSTEMS_BIOSYNTHESIS                                                           |
| 2:101439596  | MAP4K4       | REACTOME_BMAL1:CLOCK_NPAS2_ACTIVATES_CIRCADIAN_GENE_EXPRESSION                                      |
| 2:101550181  | MAP4K4       | REACTOME_BMAL1:CLOCK_NPAS2_ACTIVATES_CIRCADIAN_GENE_EXPRESSION                                      |
| 2:101603812  | MAP4K4       | REACTOME_BMAL1:CLOCK_NPAS2_ACTIVATES_CIRCADIAN_GENE_EXPRESSION                                      |
| 3:182760073  | MCCC1        | REACTOME_BRANCHED_CHAIN_AMINO_ACID_CATABOLISM                                                       |
| 8:17125768   | FGF20        | REACTOME_BUDDING_AND_MATURATION_OF_HIV_VIRION                                                       |
| 6:32362318   | HLA-DRB5     | REACTOME_BUTYROPHILIN_BTN_FAMILY_INTERACTIONS                                                       |
| 1:154804988  | GBAP1        | REACTOME_CA2PLUS_ACTIVATED_KPLUS_CHANNELS                                                           |
| 3:48835245   | IP6K2        | REACTOME_CA_DEPENDENT_EVENTS                                                                        |

|              |              |                                                                           |
|--------------|--------------|---------------------------------------------------------------------------|
| 3:123057397  | KPNA1        | REACTOME_CA_DEPENDENT_EVENTS                                              |
| 4:114424939  | CAMK2D       | REACTOME_CA_DEPENDENT_EVENTS                                              |
| 6:32151443   | HLA-DRB5     | REACTOME_CALNEXIN_CALRETICULIN_CYCLE                                      |
| 4:114424939  | CAMK2D       | REACTOME_CAMK_IV_MEDIATED_PHOSPHORYLATION_OF_CREB                         |
| 3:49462410   | IP6K2        | REACTOME_CARBOXYTERMINAL_POST_TRANSLATIONAL_MODIFICATIONS_OF_TUBULIN      |
| 14:76159192  | RPS6KL1      | REACTOME_CARBOXYTERMINAL_POST_TRANSLATIONAL_MODIFICATIONS_OF_TUBULIN      |
| 4:114424939  | CAMK2D       | REACTOME_CARDIAC_CONDUCTION                                               |
| 17:7560294   | V1NB1        | REACTOME_CARDIAC_CONDUCTION                                               |
| 17:45059032  | WNT3         | REACTOME_CARGO_CONCENTRATION_IN_THE_ER                                    |
| 17:45089680  | WNT3         | REACTOME_CARGO_CONCENTRATION_IN_THE_ER                                    |
| 1:155847427  | GBAP1        | REACTOME_CARGO_RECOGNITION_FOR_CLATHRIN_MEDIATED_ENDOCYTOSIS              |
| 1:171689486  | VAMP4        | REACTOME_CARGO_RECOGNITION_FOR_CLATHRIN_MEDIATED_ENDOCYTOSIS              |
| 2:169999639  | STK39        | REACTOME_CARGO_RECOGNITION_FOR_CLATHRIN_MEDIATED_ENDOCYTOSIS              |
| 2:170028024  | STK39        | REACTOME_CARGO_RECOGNITION_FOR_CLATHRIN_MEDIATED_ENDOCYTOSIS              |
| 4:77100807   | FAM47E-STBD1 | REACTOME_CARGO_RECOGNITION_FOR_CLATHRIN_MEDIATED_ENDOCYTOSIS              |
| 4:77104152   | FAM47E-STBD1 | REACTOME_CARGO_RECOGNITION_FOR_CLATHRIN_MEDIATED_ENDOCYTOSIS              |
| 4:77124196   | FAM47E-STBD1 | REACTOME_CARGO_RECOGNITION_FOR_CLATHRIN_MEDIATED_ENDOCYTOSIS              |
| 4:77134786   | FAM47E-STBD1 | REACTOME_CARGO_RECOGNITION_FOR_CLATHRIN_MEDIATED_ENDOCYTOSIS              |
| 9:17579690   | SH3GL2_2     | REACTOME_CARGO_RECOGNITION_FOR_CLATHRIN_MEDIATED_ENDOCYTOSIS              |
| 9:17609302   | SH3GL2_2     | REACTOME_CARGO_RECOGNITION_FOR_CLATHRIN_MEDIATED_ENDOCYTOSIS              |
| 9:17627444   | SH3GL2_2     | REACTOME_CARGO_RECOGNITION_FOR_CLATHRIN_MEDIATED_ENDOCYTOSIS              |
| 9:17710876   | SH3GL2_2     | REACTOME_CARGO_RECOGNITION_FOR_CLATHRIN_MEDIATED_ENDOCYTOSIS              |
| 9:17732590   | SH3GL2_2     | REACTOME_CARGO_RECOGNITION_FOR_CLATHRIN_MEDIATED_ENDOCYTOSIS              |
| 9:17737514   | SH3GL2_2     | REACTOME_CARGO_RECOGNITION_FOR_CLATHRIN_MEDIATED_ENDOCYTOSIS              |
| 9:17758945   | SH3GL2_2     | REACTOME_CARGO_RECOGNITION_FOR_CLATHRIN_MEDIATED_ENDOCYTOSIS              |
| 17:7129974   | V1NB1        | REACTOME_CARGO_RECOGNITION_FOR_CLATHRIN_MEDIATED_ENDOCYTOSIS              |
| 8:131153067  | FAM49B       | REACTOME_CARGO_TRAFFICKING_TO_THE_PERICILIARY_MEMBRANE                    |
| 8:131190319  | FAM49B       | REACTOME_CARGO_TRAFFICKING_TO_THE_PERICILIARY_MEMBRANE                    |
| 8:131427864  | FAM49B       | REACTOME_CARGO_TRAFFICKING_TO_THE_PERICILIARY_MEMBRANE                    |
| 10:104005410 | GBF1         | REACTOME_CARGO_TRAFFICKING_TO_THE_PERICILIARY_MEMBRANE                    |
| 10:104034550 | GBF1         | REACTOME_CARGO_TRAFFICKING_TO_THE_PERICILIARY_MEMBRANE                    |
| 10:104443875 | GBF1         | REACTOME_CARGO_TRAFFICKING_TO_THE_PERICILIARY_MEMBRANE                    |
| 10:104452818 | GBF1         | REACTOME_CARGO_TRAFFICKING_TO_THE_PERICILIARY_MEMBRANE                    |
| 8:23050400   | BIN3         | REACTOME_CASPASE_ACTIVATION_VIA_DEATH_RECEPTORS_IN_THE_PRESENCE_OF_LIGAND |
| 8:23050400   | BIN3         | REACTOME_CASPASE_ACTIVATION_VIA_EXTRINSIC_APOPTOTIC_SIGNALLING_PATHWAY    |
| 17:43999203  | WNT3         | REACTOME_CASPASE_MEDIATED_CLEAVAGE_OF_CYTOSKELETAL_PROTEINS               |
| 17:44005297  | WNT3         | REACTOME_CASPASE_MEDIATED_CLEAVAGE_OF_CYTOSKELETAL_PROTEINS               |
| 17:44019712  | WNT3         | REACTOME_CASPASE_MEDIATED_CLEAVAGE_OF_CYTOSKELETAL_PROTEINS               |
| 17:44060492  | WNT3         | REACTOME_CASPASE_MEDIATED_CLEAVAGE_OF_CYTOSKELETAL_PROTEINS               |
| 17:44065263  | WNT3         | REACTOME_CASPASE_MEDIATED_CLEAVAGE_OF_CYTOSKELETAL_PROTEINS               |
| 17:44081178  | WNT3         | REACTOME_CASPASE_MEDIATED_CLEAVAGE_OF_CYTOSKELETAL_PROTEINS               |
| 17:44083297  | WNT3         | REACTOME_CASPASE_MEDIATED_CLEAVAGE_OF_CYTOSKELETAL_PROTEINS               |
| 6:112009427  | FYN          | REACTOME_CD209_DC_SIGN_SIGNALING                                          |
| 6:112056759  | FYN          | REACTOME_CD209_DC_SIGN_SIGNALING                                          |
| 6:112151452  | FYN          | REACTOME_CD209_DC_SIGN_SIGNALING                                          |
| 6:112009427  | FYN          | REACTOME_CD28_CO_STIMULATION                                              |
| 6:112056759  | FYN          | REACTOME_CD28_CO_STIMULATION                                              |
| 6:112151452  | FYN          | REACTOME_CD28_CO_STIMULATION                                              |
| 17:43390763  | CRHR1_2      | REACTOME_CD28_CO_STIMULATION                                              |
| 6:112009427  | FYN          | REACTOME_CD28_DEPENDENT_PI3K_AKT_SIGNALING                                |
| 6:112056759  | FYN          | REACTOME_CD28_DEPENDENT_PI3K_AKT_SIGNALING                                |
| 6:112151452  | FYN          | REACTOME_CD28_DEPENDENT_PI3K_AKT_SIGNALING                                |
| 17:43390763  | CRHR1_2      | REACTOME_CD28_DEPENDENT_PI3K_AKT_SIGNALING                                |

|              |                     |                                                           |
|--------------|---------------------|-----------------------------------------------------------|
| 6:112009427  | <i>FYN</i>          | REACTOME_CD28_DEPENDENT_VAV1_PATHWAY                      |
| 6:112056759  | <i>FYN</i>          | REACTOME_CD28_DEPENDENT_VAV1_PATHWAY                      |
| 6:112151452  | <i>FYN</i>          | REACTOME_CD28_DEPENDENT_VAV1_PATHWAY                      |
| 20:5934513   | <i>CRLS1</i>        | REACTOME_CDC6_ASSOCIATION_WITH_THE_ORC:ORIGIN_COMPLEX     |
| 20:5968737   | <i>CRLS1</i>        | REACTOME_CDC6_ASSOCIATION_WITH_THE_ORC:ORIGIN_COMPLEX     |
| 20:5968964   | <i>CRLS1</i>        | REACTOME_CDC6_ASSOCIATION_WITH_THE_ORC:ORIGIN_COMPLEX     |
| 6:32814942   | <i>HLA-DRB5</i>     | REACTOME_CDK_MEDIATED_PHOSPHORYLATION_AND_REMOVAL_OF_CDC6 |
| 17:45215865  | <i>WNT3</i>         | REACTOME_CDK_MEDIATED_PHOSPHORYLATION_AND_REMOVAL_OF_CDC6 |
| 17:45244822  | <i>WNT3</i>         | REACTOME_CDK_MEDIATED_PHOSPHORYLATION_AND_REMOVAL_OF_CDC6 |
| 6:112009427  | <i>FYN</i>          | REACTOME_CELL_CELL_COMMUNICATION                          |
| 6:112056759  | <i>FYN</i>          | REACTOME_CELL_CELL_COMMUNICATION                          |
| 6:112151452  | <i>FYN</i>          | REACTOME_CELL_CELL_COMMUNICATION                          |
| 17:39883520  | <i>RETREG3</i>      | REACTOME_CELL_CELL_COMMUNICATION                          |
| 17:39883520  | <i>RETREG3</i>      | REACTOME_CELL_CELL_JUNCTION_ORGANIZATION                  |
| 3:48199695   | <i>IP6K2</i>        | REACTOME_CELL_CYCLE_CHECKPOINTS                           |
| 3:48214438   | <i>IP6K2</i>        | REACTOME_CELL_CYCLE_CHECKPOINTS                           |
| 6:32814942   | <i>HLA-DRB5</i>     | REACTOME_CELL_CYCLE_CHECKPOINTS                           |
| 12:122816734 | <i>HIP1R</i>        | REACTOME_CELL_CYCLE_CHECKPOINTS                           |
| 12:122817580 | <i>HIP1R</i>        | REACTOME_CELL_CYCLE_CHECKPOINTS                           |
| 12:122853197 | <i>HIP1R</i>        | REACTOME_CELL_CYCLE_CHECKPOINTS                           |
| 12:123057792 | <i>HIP1R</i>        | REACTOME_CELL_CYCLE_CHECKPOINTS                           |
| 12:123110365 | <i>HIP1R</i>        | REACTOME_CELL_CYCLE_CHECKPOINTS                           |
| 12:123110785 | <i>HIP1R</i>        | REACTOME_CELL_CYCLE_CHECKPOINTS                           |
| 17:7578671   | <i>V1NB1</i>        | REACTOME_CELL_CYCLE_CHECKPOINTS                           |
| 17:45215865  | <i>WNT3</i>         | REACTOME_CELL_CYCLE_CHECKPOINTS                           |
| 17:45244822  | <i>WNT3</i>         | REACTOME_CELL_CYCLE_CHECKPOINTS                           |
| 17:59922925  | <i>BRIP1</i>        | REACTOME_CELL_CYCLE_CHECKPOINTS                           |
| 20:5934513   | <i>CRLS1</i>        | REACTOME_CELL_CYCLE_CHECKPOINTS                           |
| 20:5968737   | <i>CRLS1</i>        | REACTOME_CELL_CYCLE_CHECKPOINTS                           |
| 20:5968964   | <i>CRLS1</i>        | REACTOME_CELL_CYCLE_CHECKPOINTS                           |
| 1:156059276  | <i>GBAP1</i>        | REACTOME_CELL_CYCLE_MITOTIC                               |
| 3:48199695   | <i>IP6K2</i>        | REACTOME_CELL_CYCLE_MITOTIC                               |
| 3:48214438   | <i>IP6K2</i>        | REACTOME_CELL_CYCLE_MITOTIC                               |
| 4:76695927   | <i>FAM47E-STBD1</i> | REACTOME_CELL_CYCLE_MITOTIC                               |
| 6:32814942   | <i>HLA-DRB5</i>     | REACTOME_CELL_CYCLE_MITOTIC                               |
| 10:103185542 | <i>GBF1</i>         | REACTOME_CELL_CYCLE_MITOTIC                               |
| 10:103308244 | <i>GBF1</i>         | REACTOME_CELL_CYCLE_MITOTIC                               |
| 10:104258303 | <i>GBF1</i>         | REACTOME_CELL_CYCLE_MITOTIC                               |
| 12:122816734 | <i>HIP1R</i>        | REACTOME_CELL_CYCLE_MITOTIC                               |
| 12:122817580 | <i>HIP1R</i>        | REACTOME_CELL_CYCLE_MITOTIC                               |
| 12:122853197 | <i>HIP1R</i>        | REACTOME_CELL_CYCLE_MITOTIC                               |
| 12:123057792 | <i>HIP1R</i>        | REACTOME_CELL_CYCLE_MITOTIC                               |
| 12:123110365 | <i>HIP1R</i>        | REACTOME_CELL_CYCLE_MITOTIC                               |
| 12:123110785 | <i>HIP1R</i>        | REACTOME_CELL_CYCLE_MITOTIC                               |
| 12:133206648 | <i>FBRSL1</i>       | REACTOME_CELL_CYCLE_MITOTIC                               |
| 12:133223685 | <i>FBRSL1</i>       | REACTOME_CELL_CYCLE_MITOTIC                               |
| 12:133225045 | <i>FBRSL1</i>       | REACTOME_CELL_CYCLE_MITOTIC                               |
| 17:7578671   | <i>V1NB1</i>        | REACTOME_CELL_CYCLE_MITOTIC                               |
| 17:40818584  | <i>RETREG3</i>      | REACTOME_CELL_CYCLE_MITOTIC                               |
| 17:45215865  | <i>WNT3</i>         | REACTOME_CELL_CYCLE_MITOTIC                               |
| 17:45244822  | <i>WNT3</i>         | REACTOME_CELL_CYCLE_MITOTIC                               |
| 17:76177567  | <i>DNAH17</i>       | REACTOME_CELL_CYCLE_MITOTIC                               |
| 20:5934513   | <i>CRLS1</i>        | REACTOME_CELL_CYCLE_MITOTIC                               |

|              |                     |                                                         |
|--------------|---------------------|---------------------------------------------------------|
| 20:5968737   | <i>CRLS1</i>        | REACTOME_CELL_CYCLE_MITOTIC                             |
| 20:5968964   | <i>CRLS1</i>        | REACTOME_CELL_CYCLE_MITOTIC                             |
| 21:38740824  | <i>DYRK1A</i>       | REACTOME_CELL_CYCLE_MITOTIC                             |
| 21:38770530  | <i>DYRK1A</i>       | REACTOME_CELL_CYCLE_MITOTIC                             |
| 1:156059276  | <i>GBAP1</i>        | REACTOME_CELL_CYCLE                                     |
| 3:48199695   | <i>IP6K2</i>        | REACTOME_CELL_CYCLE                                     |
| 3:48214438   | <i>IP6K2</i>        | REACTOME_CELL_CYCLE                                     |
| 4:76695927   | <i>FAM47E-STBD1</i> | REACTOME_CELL_CYCLE                                     |
| 6:32814942   | <i>HLA-DRB5</i>     | REACTOME_CELL_CYCLE                                     |
| 10:103185542 | <i>GBF1</i>         | REACTOME_CELL_CYCLE                                     |
| 10:103308244 | <i>GBF1</i>         | REACTOME_CELL_CYCLE                                     |
| 10:104258303 | <i>GBF1</i>         | REACTOME_CELL_CYCLE                                     |
| 12:122816734 | <i>HIP1R</i>        | REACTOME_CELL_CYCLE                                     |
| 12:122817580 | <i>HIP1R</i>        | REACTOME_CELL_CYCLE                                     |
| 12:122853197 | <i>HIP1R</i>        | REACTOME_CELL_CYCLE                                     |
| 12:123057792 | <i>HIP1R</i>        | REACTOME_CELL_CYCLE                                     |
| 12:123110365 | <i>HIP1R</i>        | REACTOME_CELL_CYCLE                                     |
| 12:123110785 | <i>HIP1R</i>        | REACTOME_CELL_CYCLE                                     |
| 12:133206648 | <i>FBRSL1</i>       | REACTOME_CELL_CYCLE                                     |
| 12:133223685 | <i>FBRSL1</i>       | REACTOME_CELL_CYCLE                                     |
| 12:133225045 | <i>FBRSL1</i>       | REACTOME_CELL_CYCLE                                     |
| 14:75495059  | <i>RPS6KL1</i>      | REACTOME_CELL_CYCLE                                     |
| 17:40818584  | <i>RETREG3</i>      | REACTOME_CELL_CYCLE                                     |
| 17:45215865  | <i>WNT3</i>         | REACTOME_CELL_CYCLE                                     |
| 17:45244822  | <i>WNT3</i>         | REACTOME_CELL_CYCLE                                     |
| 17:59922925  | <i>BRIP1</i>        | REACTOME_CELL_CYCLE                                     |
| 17:76177567  | <i>DNAH17</i>       | REACTOME_CELL_CYCLE                                     |
| 20:5934513   | <i>CRLS1</i>        | REACTOME_CELL_CYCLE                                     |
| 20:5968737   | <i>CRLS1</i>        | REACTOME_CELL_CYCLE                                     |
| 20:5968964   | <i>CRLS1</i>        | REACTOME_CELL_CYCLE                                     |
| 21:38740824  | <i>DYRK1A</i>       | REACTOME_CELL_CYCLE                                     |
| 21:38770530  | <i>DYRK1A</i>       | REACTOME_CELL_CYCLE                                     |
| 1:155975202  | <i>GBAP1</i>        | REACTOME_CELL_DEATH_SIGNALLING_VIA_NRAGE_NRIF_AND_NADE  |
| 1:227067656  | <i>ITPKB</i>        | REACTOME_CELL_DEATH_SIGNALLING_VIA_NRAGE_NRIF_AND_NADE  |
| 17:39883520  | <i>RETREG3</i>      | REACTOME_CELL_JUNCTION_ORGANIZATION                     |
| 6:112009427  | <i>FYN</i>          | REACTOME_CELL_SURFACE_INTERACTIONS_AT_THE_VASCULAR_WALL |
| 6:112056759  | <i>FYN</i>          | REACTOME_CELL_SURFACE_INTERACTIONS_AT_THE_VASCULAR_WALL |
| 6:112151452  | <i>FYN</i>          | REACTOME_CELL_SURFACE_INTERACTIONS_AT_THE_VASCULAR_WALL |
| 8:23050400   | <i>BIN3</i>         | REACTOME_CELL_SURFACE_INTERACTIONS_AT_THE_VASCULAR_WALL |
| 11:133947732 | <i>IGSF9B</i>       | REACTOME_CELL_SURFACE_INTERACTIONS_AT_THE_VASCULAR_WALL |
| 16:30510571  | <i>SETD1A</i>       | REACTOME_CELL_SURFACE_INTERACTIONS_AT_THE_VASCULAR_WALL |
| 16:30516492  | <i>SETD1A</i>       | REACTOME_CELL_SURFACE_INTERACTIONS_AT_THE_VASCULAR_WALL |
| 16:30520856  | <i>SETD1A</i>       | REACTOME_CELL_SURFACE_INTERACTIONS_AT_THE_VASCULAR_WALL |
| 16:31370452  | <i>SETD1A</i>       | REACTOME_CELL_SURFACE_INTERACTIONS_AT_THE_VASCULAR_WALL |
| 17:7560294   | <i>V1NB1</i>        | REACTOME_CELL_SURFACE_INTERACTIONS_AT_THE_VASCULAR_WALL |
| 1:205645310  | <i>RAB29</i>        | REACTOME_CELLULAR_HEXOSE_TRANSPORT                      |
| 2:102357447  | <i>MAP4K4</i>       | REACTOME_CELLULAR_RESPONSES_TO_EXTERNAL_STIMULI         |
| 2:102413116  | <i>MAP4K4</i>       | REACTOME_CELLULAR_RESPONSES_TO_EXTERNAL_STIMULI         |
| 4:114424939  | <i>CAMK2D</i>       | REACTOME_CELLULAR_RESPONSES_TO_EXTERNAL_STIMULI         |
| 6:31862876   | <i>HLA-DRB5</i>     | REACTOME_CELLULAR_RESPONSES_TO_EXTERNAL_STIMULI         |
| 6:32814942   | <i>HLA-DRB5</i>     | REACTOME_CELLULAR_RESPONSES_TO_EXTERNAL_STIMULI         |
| 9:34342881   | <i>UBAP2</i>        | REACTOME_CELLULAR_RESPONSES_TO_EXTERNAL_STIMULI         |
| 10:104258303 | <i>GBF1</i>         | REACTOME_CELLULAR_RESPONSES_TO_EXTERNAL_STIMULI         |

|              |                 |                                                          |
|--------------|-----------------|----------------------------------------------------------|
| 10:121429633 | <i>INPP5F</i>   | REACTOME_CELLULAR_RESPONSES_TO_EXTERNAL_STIMULI          |
| 10:121437329 | <i>INPP5F</i>   | REACTOME_CELLULAR_RESPONSES_TO_EXTERNAL_STIMULI          |
| 12:133295501 | <i>FBRSL1</i>   | REACTOME_CELLULAR_RESPONSES_TO_EXTERNAL_STIMULI          |
| 17:7578671   | <i>V1NB1</i>    | REACTOME_CELLULAR_RESPONSES_TO_EXTERNAL_STIMULI          |
| 17:40132591  | <i>RETREG3</i>  | REACTOME_CELLULAR_RESPONSES_TO_EXTERNAL_STIMULI          |
| 17:45215865  | <i>WNT3</i>     | REACTOME_CELLULAR_RESPONSES_TO_EXTERNAL_STIMULI          |
| 17:45244822  | <i>WNT3</i>     | REACTOME_CELLULAR_RESPONSES_TO_EXTERNAL_STIMULI          |
| 2:102357447  | <i>MAP4K4</i>   | REACTOME_CELLULAR_RESPONSES_TO_STRESS                    |
| 2:102413116  | <i>MAP4K4</i>   | REACTOME_CELLULAR_RESPONSES_TO_STRESS                    |
| 4:114424939  | <i>CAMK2D</i>   | REACTOME_CELLULAR_RESPONSES_TO_STRESS                    |
| 6:31862876   | <i>HLA-DRB5</i> | REACTOME_CELLULAR_RESPONSES_TO_STRESS                    |
| 6:32814942   | <i>HLA-DRB5</i> | REACTOME_CELLULAR_RESPONSES_TO_STRESS                    |
| 9:34342881   | <i>UBAP2</i>    | REACTOME_CELLULAR_RESPONSES_TO_STRESS                    |
| 10:104258303 | <i>GBF1</i>     | REACTOME_CELLULAR_RESPONSES_TO_STRESS                    |
| 10:121429633 | <i>INPP5F</i>   | REACTOME_CELLULAR_RESPONSES_TO_STRESS                    |
| 10:121437329 | <i>INPP5F</i>   | REACTOME_CELLULAR_RESPONSES_TO_STRESS                    |
| 17:7578671   | <i>V1NB1</i>    | REACTOME_CELLULAR_RESPONSES_TO_STRESS                    |
| 17:40132591  | <i>RETREG3</i>  | REACTOME_CELLULAR_RESPONSES_TO_STRESS                    |
| 17:45215865  | <i>WNT3</i>     | REACTOME_CELLULAR_RESPONSES_TO_STRESS                    |
| 17:45244822  | <i>WNT3</i>     | REACTOME_CELLULAR_RESPONSES_TO_STRESS                    |
| 4:114424939  | <i>CAMK2D</i>   | REACTOME_CELLULAR_RESPONSE_TO_HEAT_STRESS                |
| 10:121429633 | <i>INPP5F</i>   | REACTOME_CELLULAR_RESPONSE_TO_HEAT_STRESS                |
| 10:121437329 | <i>INPP5F</i>   | REACTOME_CELLULAR_RESPONSE_TO_HEAT_STRESS                |
| 17:40132591  | <i>RETREG3</i>  | REACTOME_CELLULAR_RESPONSE_TO_HEAT_STRESS                |
| 6:32814942   | <i>HLA-DRB5</i> | REACTOME_CELLULAR_RESPONSE_TO_HYPOXIA                    |
| 2:102357447  | <i>MAP4K4</i>   | REACTOME_CELLULAR_SENESCENCE                             |
| 2:102413116  | <i>MAP4K4</i>   | REACTOME_CELLULAR_SENESCENCE                             |
| 6:31862876   | <i>HLA-DRB5</i> | REACTOME_CELLULAR_SENESCENCE                             |
| 17:7578671   | <i>V1NB1</i>    | REACTOME_CELLULAR_SENESCENCE                             |
| 17:45215865  | <i>WNT3</i>     | REACTOME_CELLULAR_SENESCENCE                             |
| 17:45244822  | <i>WNT3</i>     | REACTOME_CELLULAR_SENESCENCE                             |
| 10:104258303 | <i>GBF1</i>     | REACTOME_CENTROSOME_MATURATION                           |
| 17:40818584  | <i>RETREG3</i>  | REACTOME_CENTROSOME_MATURATION                           |
| 11:10647977  | <i>RNF141</i>   | REACTOME_CGMP_EFFECTS                                    |
| 11:10648481  | <i>RNF141</i>   | REACTOME_CGMP_EFFECTS                                    |
| 11:10660840  | <i>RNF141</i>   | REACTOME_CGMP_EFFECTS                                    |
| 6:71594785   | <i>RIMS1</i>    | REACTOME_CHONDROITIN_SULFATE_DERMATAN_SULFATE_METABOLISM |
| 1:155359992  | <i>GBAP1</i>    | REACTOME_CHROMATIN_ORGANIZATION                          |
| 3:183427301  | <i>MCCC1</i>    | REACTOME_CHROMATIN_ORGANIZATION                          |
| 6:31862876   | <i>HLA-DRB5</i> | REACTOME_CHROMATIN_ORGANIZATION                          |
| 12:46134812  | <i>SCAF11</i>   | REACTOME_CHROMATIN_ORGANIZATION                          |
| 17:7155861   | <i>V1NB1</i>    | REACTOME_CHROMATIN_ORGANIZATION                          |
| 17:44160410  | <i>WNT3</i>     | REACTOME_CHROMATIN_ORGANIZATION                          |
| 17:44189067  | <i>WNT3</i>     | REACTOME_CHROMATIN_ORGANIZATION                          |
| 19:2172266   | <i>SPPL2B</i>   | REACTOME_CHROMATIN_ORGANIZATION                          |
| 12:133206648 | <i>FBRSL1</i>   | REACTOME_CHROMOSOME_MAINTENANCE                          |
| 12:133223685 | <i>FBRSL1</i>   | REACTOME_CHROMOSOME_MAINTENANCE                          |
| 12:133225045 | <i>FBRSL1</i>   | REACTOME_CHROMOSOME_MAINTENANCE                          |
| 3:121553904  | <i>KPNA1</i>    | REACTOME_CILIUM_ASSEMBLY                                 |
| 4:15492268   | <i>BST1</i>     | REACTOME_CILIUM_ASSEMBLY                                 |
| 4:15547513   | <i>BST1</i>     | REACTOME_CILIUM_ASSEMBLY                                 |
| 4:15554219   | <i>BST1</i>     | REACTOME_CILIUM_ASSEMBLY                                 |
| 6:30601232   | <i>TRIM40</i>   | REACTOME_CILIUM_ASSEMBLY                                 |

|              |                     |                                                               |
|--------------|---------------------|---------------------------------------------------------------|
| 8:131153067  | <i>FAM49B</i>       | REACTOME_CILIUM_ASSEMBLY                                      |
| 8:131190319  | <i>FAM49B</i>       | REACTOME_CILIUM_ASSEMBLY                                      |
| 8:131427864  | <i>FAM49B</i>       | REACTOME_CILIUM_ASSEMBLY                                      |
| 10:104005410 | <i>GBF1</i>         | REACTOME_CILIUM_ASSEMBLY                                      |
| 10:104034550 | <i>GBF1</i>         | REACTOME_CILIUM_ASSEMBLY                                      |
| 10:104258303 | <i>GBF1</i>         | REACTOME_CILIUM_ASSEMBLY                                      |
| 10:104443875 | <i>GBF1</i>         | REACTOME_CILIUM_ASSEMBLY                                      |
| 10:104452818 | <i>GBF1</i>         | REACTOME_CILIUM_ASSEMBLY                                      |
| 2:101439596  | <i>MAP4K4</i>       | REACTOME_CIRCADIAN_CLOCK                                      |
| 2:101550181  | <i>MAP4K4</i>       | REACTOME_CIRCADIAN_CLOCK                                      |
| 2:101603812  | <i>MAP4K4</i>       | REACTOME_CIRCADIAN_CLOCK                                      |
| 10:103185542 | <i>GBF1</i>         | REACTOME_CIRCADIAN_CLOCK                                      |
| 10:103308244 | <i>GBF1</i>         | REACTOME_CIRCADIAN_CLOCK                                      |
| 15:61293467  | <i>VPS13C</i>       | REACTOME_CIRCADIAN_CLOCK                                      |
| 3:151090424  | <i>MED12L</i>       | REACTOME_CLASS_A_1_RHODOPSIN_LIKE_RECEPTORS                   |
| 3:151099733  | <i>MED12L</i>       | REACTOME_CLASS_A_1_RHODOPSIN_LIKE_RECEPTORS                   |
| 3:151599393  | <i>MED12L</i>       | REACTOME_CLASS_A_1_RHODOPSIN_LIKE_RECEPTORS                   |
| 12:123110365 | <i>HIP1R</i>        | REACTOME_CLASS_A_1_RHODOPSIN_LIKE_RECEPTORS                   |
| 12:123110785 | <i>HIP1R</i>        | REACTOME_CLASS_A_1_RHODOPSIN_LIKE_RECEPTORS                   |
| 12:123139394 | <i>HIP1R</i>        | REACTOME_CLASS_A_1_RHODOPSIN_LIKE_RECEPTORS                   |
| 12:123155263 | <i>HIP1R</i>        | REACTOME_CLASS_A_1_RHODOPSIN_LIKE_RECEPTORS                   |
| 12:123194636 | <i>HIP1R</i>        | REACTOME_CLASS_A_1_RHODOPSIN_LIKE_RECEPTORS                   |
| 14:88472612  | <i>GALC</i>         | REACTOME_CLASS_A_1_RHODOPSIN_LIKE_RECEPTORS                   |
| 17:43744203  | <i>CRHR1_2</i>      | REACTOME_CLASS_B_2_SECRETIN_FAMILY_RECEPTORS                  |
| 17:43748712  | <i>CRHR1_2</i>      | REACTOME_CLASS_B_2_SECRETIN_FAMILY_RECEPTORS                  |
| 17:43767804  | <i>CRHR1_2</i>      | REACTOME_CLASS_B_2_SECRETIN_FAMILY_RECEPTORS                  |
| 17:43784228  | <i>CRHR1_2</i>      | REACTOME_CLASS_B_2_SECRETIN_FAMILY_RECEPTORS                  |
| 17:43791502  | <i>CRHR1_2</i>      | REACTOME_CLASS_B_2_SECRETIN_FAMILY_RECEPTORS                  |
| 17:43843861  | <i>CRHR1_2</i>      | REACTOME_CLASS_B_2_SECRETIN_FAMILY_RECEPTORS                  |
| 17:43847503  | <i>CRHR1_2</i>      | REACTOME_CLASS_B_2_SECRETIN_FAMILY_RECEPTORS                  |
| 17:44843651  | <i>WNT3</i>         | REACTOME_CLASS_B_2_SECRETIN_FAMILY_RECEPTORS                  |
| 17:44888209  | <i>WNT3</i>         | REACTOME_CLASS_B_2_SECRETIN_FAMILY_RECEPTORS                  |
| 17:44888715  | <i>WNT3</i>         | REACTOME_CLASS_B_2_SECRETIN_FAMILY_RECEPTORS                  |
| 17:44906949  | <i>WNT3</i>         | REACTOME_CLASS_B_2_SECRETIN_FAMILY_RECEPTORS                  |
| 17:44912901  | <i>WNT3</i>         | REACTOME_CLASS_B_2_SECRETIN_FAMILY_RECEPTORS                  |
| 17:44931399  | <i>WNT3</i>         | REACTOME_CLASS_B_2_SECRETIN_FAMILY_RECEPTORS                  |
| 17:44947756  | <i>WNT3</i>         | REACTOME_CLASS_B_2_SECRETIN_FAMILY_RECEPTORS                  |
| 6:29579544   | <i>TRIM40</i>       | REACTOME_CLASS_C_3_METABOTROPIC_GLUTAMATE_PHEROMONE_RECEPTORS |
| 3:49740895   | <i>IP6K2</i>        | REACTOME_CLASS_I_MHC_MEDIATED_ANTIGEN_PROCESSING_PRESENTATION |
| 3:121324643  | <i>KPNA1</i>        | REACTOME_CLASS_I_MHC_MEDIATED_ANTIGEN_PROCESSING_PRESENTATION |
| 3:121340955  | <i>KPNA1</i>        | REACTOME_CLASS_I_MHC_MEDIATED_ANTIGEN_PROCESSING_PRESENTATION |
| 3:122289921  | <i>KPNA1</i>        | REACTOME_CLASS_I_MHC_MEDIATED_ANTIGEN_PROCESSING_PRESENTATION |
| 4:15608677   | <i>BST1</i>         | REACTOME_CLASS_I_MHC_MEDIATED_ANTIGEN_PROCESSING_PRESENTATION |
| 4:170015977  | <i>CLCN3</i>        | REACTOME_CLASS_I_MHC_MEDIATED_ANTIGEN_PROCESSING_PRESENTATION |
| 5:133710339  | <i>C5orf24</i>      | REACTOME_CLASS_I_MHC_MEDIATED_ANTIGEN_PROCESSING_PRESENTATION |
| 6:29798642   | <i>TRIM40</i>       | REACTOME_CLASS_I_MHC_MEDIATED_ANTIGEN_PROCESSING_PRESENTATION |
| 6:32789400   | <i>HLA-DRB5</i>     | REACTOME_CLASS_I_MHC_MEDIATED_ANTIGEN_PROCESSING_PRESENTATION |
| 6:32791831   | <i>HLA-DRB5</i>     | REACTOME_CLASS_I_MHC_MEDIATED_ANTIGEN_PROCESSING_PRESENTATION |
| 6:32797361   | <i>HLA-DRB5</i>     | REACTOME_CLASS_I_MHC_MEDIATED_ANTIGEN_PROCESSING_PRESENTATION |
| 6:32802462   | <i>HLA-DRB5</i>     | REACTOME_CLASS_I_MHC_MEDIATED_ANTIGEN_PROCESSING_PRESENTATION |
| 6:32814942   | <i>HLA-DRB5</i>     | REACTOME_CLASS_I_MHC_MEDIATED_ANTIGEN_PROCESSING_PRESENTATION |
| 7:66096028   | <i>GS1-124K5.11</i> | REACTOME_CLASS_I_MHC_MEDIATED_ANTIGEN_PROCESSING_PRESENTATION |
| 8:12580949   | <i>CTSB</i>         | REACTOME_CLASS_I_MHC_MEDIATED_ANTIGEN_PROCESSING_PRESENTATION |

|              |                     |                                                                     |
|--------------|---------------------|---------------------------------------------------------------------|
| 9:33845203   | <i>UBAP2</i>        | REACTOME_CLASS_I_MHC_MEDIATED_ANTIGEN_PROCESSING_PRESENTATION       |
| 10:103185542 | <i>GBF1</i>         | REACTOME_CLASS_I_MHC_MEDIATED_ANTIGEN_PROCESSING_PRESENTATION       |
| 10:103308244 | <i>GBF1</i>         | REACTOME_CLASS_I_MHC_MEDIATED_ANTIGEN_PROCESSING_PRESENTATION       |
| 17:45215865  | <i>WNT3</i>         | REACTOME_CLASS_I_MHC_MEDIATED_ANTIGEN_PROCESSING_PRESENTATION       |
| 17:45244822  | <i>WNT3</i>         | REACTOME_CLASS_I_MHC_MEDIATED_ANTIGEN_PROCESSING_PRESENTATION       |
| 12:39960237  | <i>LRRK2_2</i>      | REACTOME_CLASS_I_PEROXISOMAL_MEMBRANE_PROTEIN_IMPORT                |
| 12:133295501 | <i>FBRSL1</i>       | REACTOME_CLASS_I_PEROXISOMAL_MEMBRANE_PROTEIN_IMPORT                |
| 1:155847427  | <i>GBAP1</i>        | REACTOME_CLATHRIN_MEDIATED_ENDOCYTOSIS                              |
| 1:171689486  | <i>VAMP4</i>        | REACTOME_CLATHRIN_MEDIATED_ENDOCYTOSIS                              |
| 1:171945488  | <i>VAMP4</i>        | REACTOME_CLATHRIN_MEDIATED_ENDOCYTOSIS                              |
| 1:172137119  | <i>VAMP4</i>        | REACTOME_CLATHRIN_MEDIATED_ENDOCYTOSIS                              |
| 1:172386261  | <i>VAMP4</i>        | REACTOME_CLATHRIN_MEDIATED_ENDOCYTOSIS                              |
| 2:169999639  | <i>STK39</i>        | REACTOME_CLATHRIN_MEDIATED_ENDOCYTOSIS                              |
| 2:170028024  | <i>STK39</i>        | REACTOME_CLATHRIN_MEDIATED_ENDOCYTOSIS                              |
| 4:925376     | <i>GAK</i>          | REACTOME_CLATHRIN_MEDIATED_ENDOCYTOSIS                              |
| 4:77100807   | <i>FAM47E-STBD1</i> | REACTOME_CLATHRIN_MEDIATED_ENDOCYTOSIS                              |
| 4:77104152   | <i>FAM47E-STBD1</i> | REACTOME_CLATHRIN_MEDIATED_ENDOCYTOSIS                              |
| 4:77124196   | <i>FAM47E-STBD1</i> | REACTOME_CLATHRIN_MEDIATED_ENDOCYTOSIS                              |
| 4:77134786   | <i>FAM47E-STBD1</i> | REACTOME_CLATHRIN_MEDIATED_ENDOCYTOSIS                              |
| 9:17579690   | <i>SH3GL2_2</i>     | REACTOME_CLATHRIN_MEDIATED_ENDOCYTOSIS                              |
| 9:17609302   | <i>SH3GL2_2</i>     | REACTOME_CLATHRIN_MEDIATED_ENDOCYTOSIS                              |
| 9:17627444   | <i>SH3GL2_2</i>     | REACTOME_CLATHRIN_MEDIATED_ENDOCYTOSIS                              |
| 9:17710876   | <i>SH3GL2_2</i>     | REACTOME_CLATHRIN_MEDIATED_ENDOCYTOSIS                              |
| 9:17732590   | <i>SH3GL2_2</i>     | REACTOME_CLATHRIN_MEDIATED_ENDOCYTOSIS                              |
| 9:17737514   | <i>SH3GL2_2</i>     | REACTOME_CLATHRIN_MEDIATED_ENDOCYTOSIS                              |
| 9:17758945   | <i>SH3GL2_2</i>     | REACTOME_CLATHRIN_MEDIATED_ENDOCYTOSIS                              |
| 12:123326598 | <i>HIP1R</i>        | REACTOME_CLATHRIN_MEDIATED_ENDOCYTOSIS                              |
| 17:7129974   | <i>V1NB1</i>        | REACTOME_CLATHRIN_MEDIATED_ENDOCYTOSIS                              |
| 6:32814942   | <i>HLA-DRB5</i>     | REACTOME_CLEC7A_DECTIN_1_SIGNALING                                  |
| 10:103185542 | <i>GBF1</i>         | REACTOME_CLEC7A_DECTIN_1_SIGNALING                                  |
| 10:103308244 | <i>GBF1</i>         | REACTOME_CLEC7A_DECTIN_1_SIGNALING                                  |
| 17:43390763  | <i>CRHR1_2</i>      | REACTOME_CLEC7A_DECTIN_1_SIGNALING                                  |
| 9:33791164   | <i>UBAP2</i>        | REACTOME_COBALAMIN_CBL_VITAMIN_B12_TRANSPORT_AND_METABOLISM         |
| 6:33153528   | <i>HLA-DRB5</i>     | REACTOME_COLLAGEN_BIOSYNTHESIS_AND_MODIFYING_ENZYMES                |
| 6:33153528   | <i>HLA-DRB5</i>     | REACTOME_COLLAGEN_CHAIN_TRIMERIZATION                               |
| 6:33153528   | <i>HLA-DRB5</i>     | REACTOME_COLLAGEN_DEGRADATION                                       |
| 8:11712443   | <i>CTSB</i>         | REACTOME_COLLAGEN_DEGRADATION                                       |
| 6:33153528   | <i>HLA-DRB5</i>     | REACTOME_COLLAGEN_FORMATION                                         |
| 8:11712443   | <i>CTSB</i>         | REACTOME_COLLAGEN_FORMATION                                         |
| 8:23190941   | <i>BIN3</i>         | REACTOME_COLLAGEN_FORMATION                                         |
| 8:23212542   | <i>BIN3</i>         | REACTOME_COLLAGEN_FORMATION                                         |
| 8:23223713   | <i>BIN3</i>         | REACTOME_COLLAGEN_FORMATION                                         |
| 6:31873292   | <i>HLA-DRB5</i>     | REACTOME_COMPLEMENT_CASCADE                                         |
| 6:31879377   | <i>HLA-DRB5</i>     | REACTOME_COMPLEMENT_CASCADE                                         |
| 6:31895092   | <i>HLA-DRB5</i>     | REACTOME_COMPLEMENT_CASCADE                                         |
| 6:31897219   | <i>HLA-DRB5</i>     | REACTOME_COMPLEMENT_CASCADE                                         |
| 1:161171736  | <i>FCGR2A</i>       | REACTOME_COMPLEX_I_BIOGENESIS                                       |
| 5:60273923   | <i>ELOVL7</i>       | REACTOME_COMPLEX_I_BIOGENESIS                                       |
| 6:112009427  | <i>FYN</i>          | REACTOME_CONSTITUTIVE_SIGNALING_BY_ABERRANT_PI3K_IN_CANCER          |
| 6:112056759  | <i>FYN</i>          | REACTOME_CONSTITUTIVE_SIGNALING_BY_ABERRANT_PI3K_IN_CANCER          |
| 6:112151452  | <i>FYN</i>          | REACTOME_CONSTITUTIVE_SIGNALING_BY_ABERRANT_PI3K_IN_CANCER          |
| 17:45215865  | <i>WNT3</i>         | REACTOME_CONVERSION_FROM_APC_C:CDK20_TO_APC_C:CDH1_IN_LATE_ANAPHASE |
| 17:45244822  | <i>WNT3</i>         | REACTOME_CONVERSION_FROM_APC_C:CDK20_TO_APC_C:CDH1_IN_LATE_ANAPHASE |

|              |                     |                                                                                           |
|--------------|---------------------|-------------------------------------------------------------------------------------------|
| 10:104005410 | <i>GBF1</i>         | REACTOME_COPI_DEPENDENT_GOLGI_TO_ER_RETROGRADE_TRAFFIC                                    |
| 10:104034550 | <i>GBF1</i>         | REACTOME_COPI_DEPENDENT_GOLGI_TO_ER_RETROGRADE_TRAFFIC                                    |
| 12:39759090  | <i>LRRK2_2</i>      | REACTOME_COPI_DEPENDENT_GOLGI_TO_ER_RETROGRADE_TRAFFIC                                    |
| 17:43021962  | <i>CRHR1_2</i>      | REACTOME_COPI_DEPENDENT_GOLGI_TO_ER_RETROGRADE_TRAFFIC                                    |
| 17:44800946  | <i>WNT3</i>         | REACTOME_COPI_DEPENDENT_GOLGI_TO_ER_RETROGRADE_TRAFFIC                                    |
| 17:44833217  | <i>WNT3</i>         | REACTOME_COPI_DEPENDENT_GOLGI_TO_ER_RETROGRADE_TRAFFIC                                    |
| 4:76695927   | <i>FAM47E-STBD1</i> | REACTOME_COPII_MEDIATED_VESICLE_TRANSPORT                                                 |
| 10:121683206 | <i>INPP5F</i>       | REACTOME_COPII_MEDIATED_VESICLE_TRANSPORT                                                 |
| 10:121686714 | <i>INPP5F</i>       | REACTOME_COPII_MEDIATED_VESICLE_TRANSPORT                                                 |
| 10:121689030 | <i>INPP5F</i>       | REACTOME_COPII_MEDIATED_VESICLE_TRANSPORT                                                 |
| 17:44800946  | <i>WNT3</i>         | REACTOME_COPII_MEDIATED_VESICLE_TRANSPORT                                                 |
| 17:44833217  | <i>WNT3</i>         | REACTOME_COPII_MEDIATED_VESICLE_TRANSPORT                                                 |
| 17:45059032  | <i>WNT3</i>         | REACTOME_COPII_MEDIATED_VESICLE_TRANSPORT                                                 |
| 17:45089680  | <i>WNT3</i>         | REACTOME_COPII_MEDIATED_VESICLE_TRANSPORT                                                 |
| 2:135921205  | <i>TMEM163</i>      | REACTOME_COPI_INDEPENDENT_GOLGI_TO_ER_RETROGRADE_TRAFFIC                                  |
| 10:104258303 | <i>GBF1</i>         | REACTOME_COPI_INDEPENDENT_GOLGI_TO_ER_RETROGRADE_TRAFFIC                                  |
| 3:121411876  | <i>KPNA1</i>        | REACTOME_COPI_MEDIATED_ANTEROGRADE_TRANSPORT                                              |
| 3:121412702  | <i>KPNA1</i>        | REACTOME_COPI_MEDIATED_ANTEROGRADE_TRANSPORT                                              |
| 4:76695927   | <i>FAM47E-STBD1</i> | REACTOME_COPI_MEDIATED_ANTEROGRADE_TRANSPORT                                              |
| 4:113938109  | <i>CAMK2D</i>       | REACTOME_COPI_MEDIATED_ANTEROGRADE_TRANSPORT                                              |
| 4:114077386  | <i>CAMK2D</i>       | REACTOME_COPI_MEDIATED_ANTEROGRADE_TRANSPORT                                              |
| 4:114217997  | <i>CAMK2D</i>       | REACTOME_COPI_MEDIATED_ANTEROGRADE_TRANSPORT                                              |
| 10:104005410 | <i>GBF1</i>         | REACTOME_COPI_MEDIATED_ANTEROGRADE_TRANSPORT                                              |
| 10:104034550 | <i>GBF1</i>         | REACTOME_COPI_MEDIATED_ANTEROGRADE_TRANSPORT                                              |
| 10:104258303 | <i>GBF1</i>         | REACTOME_COPI_MEDIATED_ANTEROGRADE_TRANSPORT                                              |
| 17:44800946  | <i>WNT3</i>         | REACTOME_COPI_MEDIATED_ANTEROGRADE_TRANSPORT                                              |
| 17:44833217  | <i>WNT3</i>         | REACTOME_COPI_MEDIATED_ANTEROGRADE_TRANSPORT                                              |
| 17:45059032  | <i>WNT3</i>         | REACTOME_COPI_MEDIATED_ANTEROGRADE_TRANSPORT                                              |
| 17:45089680  | <i>WNT3</i>         | REACTOME_COPI_MEDIATED_ANTEROGRADE_TRANSPORT                                              |
| 6:32602372   | <i>HLA-DRB5</i>     | REACTOME_COSTIMULATION_BY_THE_CD28_FAMILY                                                 |
| 6:112009427  | <i>FYN</i>          | REACTOME_COSTIMULATION_BY_THE_CD28_FAMILY                                                 |
| 6:112056759  | <i>FYN</i>          | REACTOME_COSTIMULATION_BY_THE_CD28_FAMILY                                                 |
| 6:112151452  | <i>FYN</i>          | REACTOME_COSTIMULATION_BY_THE_CD28_FAMILY                                                 |
| 17:43390763  | <i>CRHR1_2</i>      | REACTOME_COSTIMULATION_BY_THE_CD28_FAMILY                                                 |
| 4:114424939  | <i>CAMK2D</i>       | REACTOME_CREB1_PHOSPHORYLATION_THROUGH_NMDA_RECEPTOR_MEDIATED_ACTIVATION_OF_RAS_SIGNALING |
| 11:83188607  | <i>DLG2</i>         | REACTOME_CREB1_PHOSPHORYLATION_THROUGH_NMDA_RECEPTOR_MEDIATED_ACTIVATION_OF_RAS_SIGNALING |
| 11:83219006  | <i>DLG2</i>         | REACTOME_CREB1_PHOSPHORYLATION_THROUGH_NMDA_RECEPTOR_MEDIATED_ACTIVATION_OF_RAS_SIGNALING |
| 11:83538733  | <i>DLG2</i>         | REACTOME_CREB1_PHOSPHORYLATION_THROUGH_NMDA_RECEPTOR_MEDIATED_ACTIVATION_OF_RAS_SIGNALING |
| 11:83544472  | <i>DLG2</i>         | REACTOME_CREB1_PHOSPHORYLATION_THROUGH_NMDA_RECEPTOR_MEDIATED_ACTIVATION_OF_RAS_SIGNALING |
| 11:83656201  | <i>DLG2</i>         | REACTOME_CREB1_PHOSPHORYLATION_THROUGH_NMDA_RECEPTOR_MEDIATED_ACTIVATION_OF_RAS_SIGNALING |
| 11:83700228  | <i>DLG2</i>         | REACTOME_CREB1_PHOSPHORYLATION_THROUGH_NMDA_RECEPTOR_MEDIATED_ACTIVATION_OF_RAS_SIGNALING |
| 11:83762918  | <i>DLG2</i>         | REACTOME_CREB1_PHOSPHORYLATION_THROUGH_NMDA_RECEPTOR_MEDIATED_ACTIVATION_OF_RAS_SIGNALING |
| 11:83894247  | <i>DLG2</i>         | REACTOME_CREB1_PHOSPHORYLATION_THROUGH_NMDA_RECEPTOR_MEDIATED_ACTIVATION_OF_RAS_SIGNALING |
| 11:84021037  | <i>DLG2</i>         | REACTOME_CREB1_PHOSPHORYLATION_THROUGH_NMDA_RECEPTOR_MEDIATED_ACTIVATION_OF_RAS_SIGNALING |
| 11:84324361  | <i>DLG2</i>         | REACTOME_CREB1_PHOSPHORYLATION_THROUGH_NMDA_RECEPTOR_MEDIATED_ACTIVATION_OF_RAS_SIGNALING |
| 11:84373496  | <i>DLG2</i>         | REACTOME_CREB1_PHOSPHORYLATION_THROUGH_NMDA_RECEPTOR_MEDIATED_ACTIVATION_OF_RAS_SIGNALING |
| 11:84403409  | <i>DLG2</i>         | REACTOME_CREB1_PHOSPHORYLATION_THROUGH_NMDA_RECEPTOR_MEDIATED_ACTIVATION_OF_RAS_SIGNALING |
| 17:7101771   | <i>V1NB1</i>        | REACTOME_CREB1_PHOSPHORYLATION_THROUGH_NMDA_RECEPTOR_MEDIATED_ACTIVATION_OF_RAS_SIGNALING |
| 3:48835245   | <i>IP6K2</i>        | REACTOME_CREB1_PHOSPHORYLATION_THROUGH_THE_ACTIVATION_OF_ADENYLATE_CYCLASE                |
| 1:155181232  | <i>GBAP1</i>        | REACTOME_CRISTAE_FORMATION                                                                |
| 6:112009427  | <i>FYN</i>          | REACTOME_CRMP5_IN_SEMA3A_SIGNALING                                                        |
| 6:112056759  | <i>FYN</i>          | REACTOME_CRMP5_IN_SEMA3A_SIGNALING                                                        |
| 6:112151452  | <i>FYN</i>          | REACTOME_CRMP5_IN_SEMA3A_SIGNALING                                                        |

|              |                 |                                                                     |
|--------------|-----------------|---------------------------------------------------------------------|
| 8:23190941   | <i>BIN3</i>     | REACTOME_CROSSLINKING_OF_COLLAGEN_FIBRILS                           |
| 8:23212542   | <i>BIN3</i>     | REACTOME_CROSSLINKING_OF_COLLAGEN_FIBRILS                           |
| 8:23223713   | <i>BIN3</i>     | REACTOME_CROSSLINKING_OF_COLLAGEN_FIBRILS                           |
| 6:32814942   | <i>HLA-DRB5</i> | REACTOME_CROSS_PRESENTATION_OF_SOLUBLE_EXOGENOUS_ANTIGENS_ENDOSOMES |
| 6:112009427  | <i>FYN</i>      | REACTOME_CTLA4_INHIBITORY_SIGNALING                                 |
| 6:112056759  | <i>FYN</i>      | REACTOME_CTLA4_INHIBITORY_SIGNALING                                 |
| 6:112151452  | <i>FYN</i>      | REACTOME_CTLA4_INHIBITORY_SIGNALING                                 |
| 6:32814942   | <i>HLA-DRB5</i> | REACTOME_C_TYPE_LECTIN_RECEPTORS_CLRS                               |
| 6:112009427  | <i>FYN</i>      | REACTOME_C_TYPE_LECTIN_RECEPTORS_CLRS                               |
| 6:112056759  | <i>FYN</i>      | REACTOME_C_TYPE_LECTIN_RECEPTORS_CLRS                               |
| 6:112151452  | <i>FYN</i>      | REACTOME_C_TYPE_LECTIN_RECEPTORS_CLRS                               |
| 10:103185542 | <i>GBF1</i>     | REACTOME_C_TYPE_LECTIN_RECEPTORS_CLRS                               |
| 10:103308244 | <i>GBF1</i>     | REACTOME_C_TYPE_LECTIN_RECEPTORS_CLRS                               |
| 17:43390763  | <i>CRHR1_2</i>  | REACTOME_C_TYPE_LECTIN_RECEPTORS_CLRS                               |
| 3:48199695   | <i>IP6K2</i>    | REACTOME_CYCLIN_A_B1_B2_ASSOCIATED_EVENTS_DURING_G2_M_TRANSITION    |
| 3:48214438   | <i>IP6K2</i>    | REACTOME_CYCLIN_A_B1_B2_ASSOCIATED_EVENTS_DURING_G2_M_TRANSITION    |
| 3:48199695   | <i>IP6K2</i>    | REACTOME_CYCLIN_A:CDK2_ASSOCIATED_EVENTS_AT_S_PHASE_ENTRY           |
| 3:48214438   | <i>IP6K2</i>    | REACTOME_CYCLIN_A:CDK2_ASSOCIATED_EVENTS_AT_S_PHASE_ENTRY           |
| 6:32814942   | <i>HLA-DRB5</i> | REACTOME_CYCLIN_A:CDK2_ASSOCIATED_EVENTS_AT_S_PHASE_ENTRY           |
| 2:102609356  | <i>MAP4K4</i>   | REACTOME_CYTOKINE_SIGNALING_IN_IMMUNE_SYSTEM                        |
| 2:102636759  | <i>MAP4K4</i>   | REACTOME_CYTOKINE_SIGNALING_IN_IMMUNE_SYSTEM                        |
| 2:103063855  | <i>MAP4K4</i>   | REACTOME_CYTOKINE_SIGNALING_IN_IMMUNE_SYSTEM                        |
| 3:48748989   | <i>IP6K2</i>    | REACTOME_CYTOKINE_SIGNALING_IN_IMMUNE_SYSTEM                        |
| 3:48766111   | <i>IP6K2</i>    | REACTOME_CYTOKINE_SIGNALING_IN_IMMUNE_SYSTEM                        |
| 4:114424939  | <i>CAMK2D</i>   | REACTOME_CYTOKINE_SIGNALING_IN_IMMUNE_SYSTEM                        |
| 6:29798642   | <i>TRIM40</i>   | REACTOME_CYTOKINE_SIGNALING_IN_IMMUNE_SYSTEM                        |
| 6:30075864   | <i>TRIM40</i>   | REACTOME_CYTOKINE_SIGNALING_IN_IMMUNE_SYSTEM                        |
| 6:32151443   | <i>HLA-DRB5</i> | REACTOME_CYTOKINE_SIGNALING_IN_IMMUNE_SYSTEM                        |
| 6:32602372   | <i>HLA-DRB5</i> | REACTOME_CYTOKINE_SIGNALING_IN_IMMUNE_SYSTEM                        |
| 6:32814942   | <i>HLA-DRB5</i> | REACTOME_CYTOKINE_SIGNALING_IN_IMMUNE_SYSTEM                        |
| 6:112009427  | <i>FYN</i>      | REACTOME_CYTOKINE_SIGNALING_IN_IMMUNE_SYSTEM                        |
| 6:112056759  | <i>FYN</i>      | REACTOME_CYTOKINE_SIGNALING_IN_IMMUNE_SYSTEM                        |
| 6:112151452  | <i>FYN</i>      | REACTOME_CYTOKINE_SIGNALING_IN_IMMUNE_SYSTEM                        |
| 8:21665306   | <i>BIN3</i>     | REACTOME_CYTOKINE_SIGNALING_IN_IMMUNE_SYSTEM                        |
| 8:21668901   | <i>BIN3</i>     | REACTOME_CYTOKINE_SIGNALING_IN_IMMUNE_SYSTEM                        |
| 10:103185542 | <i>GBF1</i>     | REACTOME_CYTOKINE_SIGNALING_IN_IMMUNE_SYSTEM                        |
| 10:103308244 | <i>GBF1</i>     | REACTOME_CYTOKINE_SIGNALING_IN_IMMUNE_SYSTEM                        |
| 11:83188607  | <i>DLG2</i>     | REACTOME_CYTOKINE_SIGNALING_IN_IMMUNE_SYSTEM                        |
| 11:83219006  | <i>DLG2</i>     | REACTOME_CYTOKINE_SIGNALING_IN_IMMUNE_SYSTEM                        |
| 11:83538733  | <i>DLG2</i>     | REACTOME_CYTOKINE_SIGNALING_IN_IMMUNE_SYSTEM                        |
| 11:83544472  | <i>DLG2</i>     | REACTOME_CYTOKINE_SIGNALING_IN_IMMUNE_SYSTEM                        |
| 11:83656201  | <i>DLG2</i>     | REACTOME_CYTOKINE_SIGNALING_IN_IMMUNE_SYSTEM                        |
| 11:83700228  | <i>DLG2</i>     | REACTOME_CYTOKINE_SIGNALING_IN_IMMUNE_SYSTEM                        |
| 11:83762918  | <i>DLG2</i>     | REACTOME_CYTOKINE_SIGNALING_IN_IMMUNE_SYSTEM                        |
| 11:83894247  | <i>DLG2</i>     | REACTOME_CYTOKINE_SIGNALING_IN_IMMUNE_SYSTEM                        |
| 11:84021037  | <i>DLG2</i>     | REACTOME_CYTOKINE_SIGNALING_IN_IMMUNE_SYSTEM                        |
| 11:84324361  | <i>DLG2</i>     | REACTOME_CYTOKINE_SIGNALING_IN_IMMUNE_SYSTEM                        |
| 11:84373496  | <i>DLG2</i>     | REACTOME_CYTOKINE_SIGNALING_IN_IMMUNE_SYSTEM                        |
| 11:84403409  | <i>DLG2</i>     | REACTOME_CYTOKINE_SIGNALING_IN_IMMUNE_SYSTEM                        |
| 15:61293467  | <i>VPS13C</i>   | REACTOME_CYTOKINE_SIGNALING_IN_IMMUNE_SYSTEM                        |
| 16:31370452  | <i>SETD1A</i>   | REACTOME_CYTOKINE_SIGNALING_IN_IMMUNE_SYSTEM                        |
| 16:50730088  | <i>CASC16</i>   | REACTOME_CYTOKINE_SIGNALING_IN_IMMUNE_SYSTEM                        |
| 16:50730446  | <i>CASC16</i>   | REACTOME_CYTOKINE_SIGNALING_IN_IMMUNE_SYSTEM                        |

|              |                     |                                                                   |
|--------------|---------------------|-------------------------------------------------------------------|
| 16:50745926  | <i>CASC16</i>       | REACTOME_CYTOKINE_SIGNALING_IN_IMMUNE_SYSTEM                      |
| 17:7101771   | <i>V1NB1</i>        | REACTOME_CYTOKINE_SIGNALING_IN_IMMUNE_SYSTEM                      |
| 17:7479140   | <i>V1NB1</i>        | REACTOME_CYTOKINE_SIGNALING_IN_IMMUNE_SYSTEM                      |
| 17:7480325   | <i>V1NB1</i>        | REACTOME_CYTOKINE_SIGNALING_IN_IMMUNE_SYSTEM                      |
| 17:7578671   | <i>V1NB1</i>        | REACTOME_CYTOKINE_SIGNALING_IN_IMMUNE_SYSTEM                      |
| 17:40392358  | <i>RETREG3</i>      | REACTOME_CYTOKINE_SIGNALING_IN_IMMUNE_SYSTEM                      |
| 17:43390763  | <i>CRHR1_2</i>      | REACTOME_CYTOKINE_SIGNALING_IN_IMMUNE_SYSTEM                      |
| 17:59922925  | <i>BRIP1</i>        | REACTOME_CYTOSOLIC_IRON_SULFUR_CLUSTER_ASSEMBLY                   |
| 7:65705034   | <i>GS1-124K5.11</i> | REACTOME_CYTOSOLIC_SULFONATION_OF_SMALL_MOLECULES                 |
| 6:31758240   | <i>HLA-DRB5</i>     | REACTOME_CYTOSOLIC_TRNA_AMINOACYLATION                            |
| 6:31762311   | <i>HLA-DRB5</i>     | REACTOME_CYTOSOLIC_TRNA_AMINOACYLATION                            |
| 3:48835245   | <i>IP6K2</i>        | REACTOME_DAG_AND_IP3_SIGNALING                                    |
| 3:123057397  | <i>KPNA1</i>        | REACTOME_DAG_AND_IP3_SIGNALING                                    |
| 4:114424939  | <i>CAMK2D</i>       | REACTOME_DAG_AND_IP3_SIGNALING                                    |
| 6:112009427  | <i>FYN</i>          | REACTOME_DAP12_INTERACTIONS                                       |
| 6:112056759  | <i>FYN</i>          | REACTOME_DAP12_INTERACTIONS                                       |
| 6:112151452  | <i>FYN</i>          | REACTOME_DAP12_INTERACTIONS                                       |
| 6:112009427  | <i>FYN</i>          | REACTOME_DAP12_SIGNALING                                          |
| 6:112056759  | <i>FYN</i>          | REACTOME_DAP12_SIGNALING                                          |
| 6:112151452  | <i>FYN</i>          | REACTOME_DAP12_SIGNALING                                          |
| 3:48835245   | <i>IP6K2</i>        | REACTOME_DARPP_32_EVENTS                                          |
| 5:59236972   | <i>ELOVL7</i>       | REACTOME_DARPP_32_EVENTS                                          |
| 5:59665659   | <i>ELOVL7</i>       | REACTOME_DARPP_32_EVENTS                                          |
| 5:59705316   | <i>ELOVL7</i>       | REACTOME_DARPP_32_EVENTS                                          |
| 5:59736085   | <i>ELOVL7</i>       | REACTOME_DARPP_32_EVENTS                                          |
| 6:112009427  | <i>FYN</i>          | REACTOME_DCC_MEDIATED_ATTRACTIVE_SIGNALING                        |
| 6:112056759  | <i>FYN</i>          | REACTOME_DCC_MEDIATED_ATTRACTIVE_SIGNALING                        |
| 6:112151452  | <i>FYN</i>          | REACTOME_DCC_MEDIATED_ATTRACTIVE_SIGNALING                        |
| 6:32151443   | <i>HLA-DRB5</i>     | REACTOME_DDX58_IFIH1_MEDIATED_INDUCION_OF_INTERFERON_ALPHA_BETA   |
| 10:103185542 | <i>GBF1</i>         | REACTOME_DEACTIVATION_OF_THE_BETA_CATENIN_TRANSACTIVATING_COMPLEX |
| 10:103308244 | <i>GBF1</i>         | REACTOME_DEACTIVATION_OF_THE_BETA_CATENIN_TRANSACTIVATING_COMPLEX |
| 19:3022354   | <i>SPPL2B</i>       | REACTOME_DEACTIVATION_OF_THE_BETA_CATENIN_TRANSACTIVATING_COMPLEX |
| 19:3036350   | <i>SPPL2B</i>       | REACTOME_DEACTIVATION_OF_THE_BETA_CATENIN_TRANSACTIVATING_COMPLEX |
| 17:7479140   | <i>V1NB1</i>        | REACTOME_DEADENYLATION_DEPENDENT_MRNA_DECAY                       |
| 17:7480325   | <i>V1NB1</i>        | REACTOME_DEADENYLATION_DEPENDENT_MRNA_DECAY                       |
| 17:7479140   | <i>V1NB1</i>        | REACTOME_DEADENYLATION_OF_MRNA                                    |
| 17:7480325   | <i>V1NB1</i>        | REACTOME_DEADENYLATION_OF_MRNA                                    |
| 1:155975202  | <i>GBAP1</i>        | REACTOME_DEATH_RECEPTOR_SIGNALLING                                |
| 1:227067656  | <i>ITPKB</i>        | REACTOME_DEATH_RECEPTOR_SIGNALLING                                |
| 3:49406095   | <i>IP6K2</i>        | REACTOME_DEATH_RECEPTOR_SIGNALLING                                |
| 3:49424231   | <i>IP6K2</i>        | REACTOME_DEATH_RECEPTOR_SIGNALLING                                |
| 3:49450137   | <i>IP6K2</i>        | REACTOME_DEATH_RECEPTOR_SIGNALLING                                |
| 8:23050400   | <i>BIN3</i>         | REACTOME_DEATH_RECEPTOR_SIGNALLING                                |
| 19:2335872   | <i>SPPL2B</i>       | REACTOME_DEATH_RECEPTOR_SIGNALLING                                |
| 19:2346990   | <i>SPPL2B</i>       | REACTOME_DEATH_RECEPTOR_SIGNALLING                                |
| 19:2352757   | <i>SPPL2B</i>       | REACTOME_DEATH_RECEPTOR_SIGNALLING                                |
| 6:32814942   | <i>HLA-DRB5</i>     | REACTOME_DECTIN_1_MEDIATED_NONCANONICAL_NF_KB_SIGNALING           |
| 10:103185542 | <i>GBF1</i>         | REACTOME_DECTIN_1_MEDIATED_NONCANONICAL_NF_KB_SIGNALING           |
| 10:103308244 | <i>GBF1</i>         | REACTOME_DECTIN_1_MEDIATED_NONCANONICAL_NF_KB_SIGNALING           |
| 17:43390763  | <i>CRHR1_2</i>      | REACTOME_DECTIN_1_MEDIATED_NONCANONICAL_NF_KB_SIGNALING           |
| 6:112009427  | <i>FYN</i>          | REACTOME_DECTIN_2_FAMILY                                          |
| 6:112056759  | <i>FYN</i>          | REACTOME_DECTIN_2_FAMILY                                          |
| 6:112151452  | <i>FYN</i>          | REACTOME_DECTIN_2_FAMILY                                          |

|              |                 |                                                                 |
|--------------|-----------------|-----------------------------------------------------------------|
| 6:32151443   | <i>HLA-DRB5</i> | REACTOME_DEFECTIVE_CFTR_CAUSES_CYSTIC_FIBROSIS                  |
| 6:32814942   | <i>HLA-DRB5</i> | REACTOME_DEFECTIVE_CFTR_CAUSES_CYSTIC_FIBROSIS                  |
| 6:32186193   | <i>HLA-DRB5</i> | REACTOME_DEFECTIVE_LFNG_CAUSES_SCD03                            |
| 3:182760073  | <i>MCCC1</i>    | REACTOME_DEFECTS_IN_BIOTIN_BTN_METABOLISM                       |
| 21:38328886  | <i>DYRK1A</i>   | REACTOME_DEFECTS_IN_BIOTIN_BTN_METABOLISM                       |
| 3:182760073  | <i>MCCC1</i>    | REACTOME_DEFECTS_IN_VITAMIN_AND_COFACTOR_METABOLISM             |
| 21:38328886  | <i>DYRK1A</i>   | REACTOME_DEFECTS_IN_VITAMIN_AND_COFACTOR_METABOLISM             |
| 9:33791164   | <i>UBAP2</i>    | REACTOME_DEFENSINS                                              |
| 6:32814942   | <i>HLA-DRB5</i> | REACTOME_DEGRADATION_OF_AXIN                                    |
| 6:32814942   | <i>HLA-DRB5</i> | REACTOME_DEGRADATION_OF_BETA_CATENIN_BY_THE_DESTRUCTION_COMPLEX |
| 10:103185542 | <i>GBF1</i>     | REACTOME_DEGRADATION_OF_BETA_CATENIN_BY_THE_DESTRUCTION_COMPLEX |
| 10:103308244 | <i>GBF1</i>     | REACTOME_DEGRADATION_OF_BETA_CATENIN_BY_THE_DESTRUCTION_COMPLEX |
| 19:3022354   | <i>SPPL2B</i>   | REACTOME_DEGRADATION_OF_BETA_CATENIN_BY_THE_DESTRUCTION_COMPLEX |
| 19:3036350   | <i>SPPL2B</i>   | REACTOME_DEGRADATION_OF_BETA_CATENIN_BY_THE_DESTRUCTION_COMPLEX |
| 6:32814942   | <i>HLA-DRB5</i> | REACTOME_DEGRADATION_OF_DVL                                     |
| 17:7129974   | <i>V1NB1</i>    | REACTOME_DEGRADATION_OF_DVL                                     |
| 6:32814942   | <i>HLA-DRB5</i> | REACTOME_DEGRADATION_OF_GLI1_BY_THE_PROTEASOME                  |
| 10:103185542 | <i>GBF1</i>     | REACTOME_DEGRADATION_OF_GLI1_BY_THE_PROTEASOME                  |
| 10:103308244 | <i>GBF1</i>     | REACTOME_DEGRADATION_OF_GLI1_BY_THE_PROTEASOME                  |
| 10:104285824 | <i>GBF1</i>     | REACTOME_DEGRADATION_OF_GLI1_BY_THE_PROTEASOME                  |
| 1:155027082  | <i>GBAP1</i>    | REACTOME_DEGRADATION_OF_THE_EXTRACELLULAR_MATRIX                |
| 1:155033317  | <i>GBAP1</i>    | REACTOME_DEGRADATION_OF_THE_EXTRACELLULAR_MATRIX                |
| 6:33153528   | <i>HLA-DRB5</i> | REACTOME_DEGRADATION_OF_THE_EXTRACELLULAR_MATRIX                |
| 8:11712443   | <i>CTSB</i>     | REACTOME_DEGRADATION_OF_THE_EXTRACELLULAR_MATRIX                |
| 1:156059276  | <i>GBAP1</i>    | REACTOME_DEPOLYMERISATION_OF_THE_NUCLEAR_LAMINA                 |
| 9:34342881   | <i>UBAP2</i>    | REACTOME_DETOXIFICATION_OF_REACTIVE_OXYGEN_SPECIES              |
| 3:48199695   | <i>IP6K2</i>    | REACTOME_DEUBIQUITINATION                                       |
| 3:48214438   | <i>IP6K2</i>    | REACTOME_DEUBIQUITINATION                                       |
| 3:49406095   | <i>IP6K2</i>    | REACTOME_DEUBIQUITINATION                                       |
| 3:49424231   | <i>IP6K2</i>    | REACTOME_DEUBIQUITINATION                                       |
| 3:49450137   | <i>IP6K2</i>    | REACTOME_DEUBIQUITINATION                                       |
| 3:49740895   | <i>IP6K2</i>    | REACTOME_DEUBIQUITINATION                                       |
| 6:32814942   | <i>HLA-DRB5</i> | REACTOME_DEUBIQUITINATION                                       |
| 16:50730088  | <i>CASC16</i>   | REACTOME_DEUBIQUITINATION                                       |
| 16:50730446  | <i>CASC16</i>   | REACTOME_DEUBIQUITINATION                                       |
| 16:50745926  | <i>CASC16</i>   | REACTOME_DEUBIQUITINATION                                       |
| 17:7578671   | <i>V1NB1</i>    | REACTOME_DEUBIQUITINATION                                       |
| 1:171945488  | <i>VAMP4</i>    | REACTOME_DEVELOPMENTAL_BIOLOGY                                  |
| 1:172137119  | <i>VAMP4</i>    | REACTOME_DEVELOPMENTAL_BIOLOGY                                  |
| 1:172386261  | <i>VAMP4</i>    | REACTOME_DEVELOPMENTAL_BIOLOGY                                  |
| 1:227067656  | <i>ITPKB</i>    | REACTOME_DEVELOPMENTAL_BIOLOGY                                  |
| 3:48835245   | <i>IP6K2</i>    | REACTOME_DEVELOPMENTAL_BIOLOGY                                  |
| 3:49406095   | <i>IP6K2</i>    | REACTOME_DEVELOPMENTAL_BIOLOGY                                  |
| 3:49424231   | <i>IP6K2</i>    | REACTOME_DEVELOPMENTAL_BIOLOGY                                  |
| 3:49450137   | <i>IP6K2</i>    | REACTOME_DEVELOPMENTAL_BIOLOGY                                  |
| 3:49561208   | <i>IP6K2</i>    | REACTOME_DEVELOPMENTAL_BIOLOGY                                  |
| 4:17622910   | <i>LCORL</i>    | REACTOME_DEVELOPMENTAL_BIOLOGY                                  |
| 4:17632603   | <i>LCORL</i>    | REACTOME_DEVELOPMENTAL_BIOLOGY                                  |
| 4:113938109  | <i>CAMK2D</i>   | REACTOME_DEVELOPMENTAL_BIOLOGY                                  |
| 4:114077386  | <i>CAMK2D</i>   | REACTOME_DEVELOPMENTAL_BIOLOGY                                  |
| 4:114217997  | <i>CAMK2D</i>   | REACTOME_DEVELOPMENTAL_BIOLOGY                                  |
| 6:32814942   | <i>HLA-DRB5</i> | REACTOME_DEVELOPMENTAL_BIOLOGY                                  |
| 6:112009427  | <i>FYN</i>      | REACTOME_DEVELOPMENTAL_BIOLOGY                                  |

|              |                     |                                                                                         |
|--------------|---------------------|-----------------------------------------------------------------------------------------|
| 6:112056759  | <i>FYN</i>          | REACTOME_DEVELOPMENTAL_BIOLOGY                                                          |
| 6:112151452  | <i>FYN</i>          | REACTOME_DEVELOPMENTAL_BIOLOGY                                                          |
| 8:21665306   | <i>BIN3</i>         | REACTOME_DEVELOPMENTAL_BIOLOGY                                                          |
| 8:21668901   | <i>BIN3</i>         | REACTOME_DEVELOPMENTAL_BIOLOGY                                                          |
| 9:17579690   | <i>SH3GL2_2</i>     | REACTOME_DEVELOPMENTAL_BIOLOGY                                                          |
| 9:17609302   | <i>SH3GL2_2</i>     | REACTOME_DEVELOPMENTAL_BIOLOGY                                                          |
| 9:17627444   | <i>SH3GL2_2</i>     | REACTOME_DEVELOPMENTAL_BIOLOGY                                                          |
| 9:17710876   | <i>SH3GL2_2</i>     | REACTOME_DEVELOPMENTAL_BIOLOGY                                                          |
| 9:17732590   | <i>SH3GL2_2</i>     | REACTOME_DEVELOPMENTAL_BIOLOGY                                                          |
| 9:17737514   | <i>SH3GL2_2</i>     | REACTOME_DEVELOPMENTAL_BIOLOGY                                                          |
| 9:17758945   | <i>SH3GL2_2</i>     | REACTOME_DEVELOPMENTAL_BIOLOGY                                                          |
| 12:41147295  | <i>LRRK2_2</i>      | REACTOME_DEVELOPMENTAL_BIOLOGY                                                          |
| 12:41251554  | <i>LRRK2_2</i>      | REACTOME_DEVELOPMENTAL_BIOLOGY                                                          |
| 12:41407403  | <i>LRRK2_2</i>      | REACTOME_DEVELOPMENTAL_BIOLOGY                                                          |
| 16:31004169  | <i>SETD1A</i>       | REACTOME_DEVELOPMENTAL_BIOLOGY                                                          |
| 17:7101771   | <i>V1NB1</i>        | REACTOME_DEVELOPMENTAL_BIOLOGY                                                          |
| 17:39883520  | <i>RETREG3</i>      | REACTOME_DEVELOPMENTAL_BIOLOGY                                                          |
| 17:7129974   | <i>V1NB1</i>        | REACTOME_DISASSEMBLY_OF_THE_DESTRUCTION_COMPLEX_AND_RECRUITMENT_OF_AXIN_TO_THE_MEMBRANE |
| 17:7491546   | <i>V1NB1</i>        | REACTOME_DISEASES_ASSOCIATED_WITH_N_GLYCOSYLATION_OF_PROTEINS                           |
| 3:49561208   | <i>IP6K2</i>        | REACTOME_DISEASES_ASSOCIATED_WITH_O_GLYCOSYLATION_OF_PROTEINS                           |
| 3:122645304  | <i>KPNA1</i>        | REACTOME_DISEASES_ASSOCIATED_WITH_O_GLYCOSYLATION_OF_PROTEINS                           |
| 6:32186193   | <i>HLA-DRB5</i>     | REACTOME_DISEASES_ASSOCIATED_WITH_O_GLYCOSYLATION_OF_PROTEINS                           |
| 9:18650547   | <i>SH3GL2_2</i>     | REACTOME_DISEASES_ASSOCIATED_WITH_O_GLYCOSYLATION_OF_PROTEINS                           |
| 1:156059276  | <i>GBAP1</i>        | REACTOME_DISEASE                                                                        |
| 1:227067656  | <i>ITPKB</i>        | REACTOME_DISEASE                                                                        |
| 2:135708115  | <i>TMEM163</i>      | REACTOME_DISEASE                                                                        |
| 3:48199695   | <i>IP6K2</i>        | REACTOME_DISEASE                                                                        |
| 3:48214438   | <i>IP6K2</i>        | REACTOME_DISEASE                                                                        |
| 3:49561208   | <i>IP6K2</i>        | REACTOME_DISEASE                                                                        |
| 3:122645304  | <i>KPNA1</i>        | REACTOME_DISEASE                                                                        |
| 3:182760073  | <i>MCCC1</i>        | REACTOME_DISEASE                                                                        |
| 4:114424939  | <i>CAMK2D</i>       | REACTOME_DISEASE                                                                        |
| 6:31925679   | <i>HLA-DRB5</i>     | REACTOME_DISEASE                                                                        |
| 6:32151443   | <i>HLA-DRB5</i>     | REACTOME_DISEASE                                                                        |
| 6:32186193   | <i>HLA-DRB5</i>     | REACTOME_DISEASE                                                                        |
| 6:32814942   | <i>HLA-DRB5</i>     | REACTOME_DISEASE                                                                        |
| 6:112009427  | <i>FYN</i>          | REACTOME_DISEASE                                                                        |
| 6:112056759  | <i>FYN</i>          | REACTOME_DISEASE                                                                        |
| 6:112151452  | <i>FYN</i>          | REACTOME_DISEASE                                                                        |
| 7:65425894   | <i>GS1-124K5.11</i> | REACTOME_DISEASE                                                                        |
| 8:17125768   | <i>FGF20</i>        | REACTOME_DISEASE                                                                        |
| 9:17579690   | <i>SH3GL2_2</i>     | REACTOME_DISEASE                                                                        |
| 9:17609302   | <i>SH3GL2_2</i>     | REACTOME_DISEASE                                                                        |
| 9:17627444   | <i>SH3GL2_2</i>     | REACTOME_DISEASE                                                                        |
| 9:17710876   | <i>SH3GL2_2</i>     | REACTOME_DISEASE                                                                        |
| 9:17732590   | <i>SH3GL2_2</i>     | REACTOME_DISEASE                                                                        |
| 9:17737514   | <i>SH3GL2_2</i>     | REACTOME_DISEASE                                                                        |
| 9:17758945   | <i>SH3GL2_2</i>     | REACTOME_DISEASE                                                                        |
| 9:18650547   | <i>SH3GL2_2</i>     | REACTOME_DISEASE                                                                        |
| 10:15199347  | <i>ITGA8</i>        | REACTOME_DISEASE                                                                        |
| 10:103185542 | <i>GBF1</i>         | REACTOME_DISEASE                                                                        |
| 10:103308244 | <i>GBF1</i>         | REACTOME_DISEASE                                                                        |
| 10:104591639 | <i>GBF1</i>         | REACTOME_DISEASE                                                                        |

|              |                     |                                                        |
|--------------|---------------------|--------------------------------------------------------|
| 16:31004169  | <i>SETD1A</i>       | REACTOME_DISEASE                                       |
| 17:7491546   | <i>V1NB1</i>        | REACTOME_DISEASE                                       |
| 17:40392358  | <i>RETREG3</i>      | REACTOME_DISEASE                                       |
| 17:41056283  | <i>RETREG3</i>      | REACTOME_DISEASE                                       |
| 17:42338993  | <i>FAM171A2</i>     | REACTOME_DISEASE                                       |
| 17:43132290  | <i>CRHR1_2</i>      | REACTOME_DISEASE                                       |
| 21:38328886  | <i>DYRK1A</i>       | REACTOME_DISEASE                                       |
| 7:65425894   | <i>GS1-124K5.11</i> | REACTOME_DISEASES_OF_CARBOHYDRATE_METABOLISM           |
| 17:41056283  | <i>RETREG3</i>      | REACTOME_DISEASES_OF_CARBOHYDRATE_METABOLISM           |
| 3:49561208   | <i>IP6K2</i>        | REACTOME_DISEASES_OF_GLYCOSYLATION                     |
| 3:122645304  | <i>KPNA1</i>        | REACTOME_DISEASES_OF_GLYCOSYLATION                     |
| 6:32186193   | <i>HLA-DRB5</i>     | REACTOME_DISEASES_OF_GLYCOSYLATION                     |
| 9:18650547   | <i>SH3GL2_2</i>     | REACTOME_DISEASES_OF_GLYCOSYLATION                     |
| 17:7491546   | <i>V1NB1</i>        | REACTOME_DISEASES_OF_GLYCOSYLATION                     |
| 3:182760073  | <i>MCCC1</i>        | REACTOME_DISEASES_OF_METABOLISM                        |
| 7:65425894   | <i>GS1-124K5.11</i> | REACTOME_DISEASES_OF_METABOLISM                        |
| 10:104591639 | <i>GBF1</i>         | REACTOME_DISEASES_OF_METABOLISM                        |
| 17:41056283  | <i>RETREG3</i>      | REACTOME_DISEASES_OF_METABOLISM                        |
| 21:38328886  | <i>DYRK1A</i>       | REACTOME_DISEASES_OF_METABOLISM                        |
| 1:156059276  | <i>GBAP1</i>        | REACTOME_DISEASES_OF_SIGNAL_TRANSDUCTION               |
| 1:227067656  | <i>ITPKB</i>        | REACTOME_DISEASES_OF_SIGNAL_TRANSDUCTION               |
| 4:114424939  | <i>CAMK2D</i>       | REACTOME_DISEASES_OF_SIGNAL_TRANSDUCTION               |
| 6:32814942   | <i>HLA-DRB5</i>     | REACTOME_DISEASES_OF_SIGNAL_TRANSDUCTION               |
| 6:112009427  | <i>FYN</i>          | REACTOME_DISEASES_OF_SIGNAL_TRANSDUCTION               |
| 6:112056759  | <i>FYN</i>          | REACTOME_DISEASES_OF_SIGNAL_TRANSDUCTION               |
| 6:112151452  | <i>FYN</i>          | REACTOME_DISEASES_OF_SIGNAL_TRANSDUCTION               |
| 17:40392358  | <i>RETREG3</i>      | REACTOME_DISEASES_OF_SIGNAL_TRANSDUCTION               |
| 6:32151443   | <i>HLA-DRB5</i>     | REACTOME_DISORDERS_OF_TRANSMEMBRANE_TRANSPORTERS       |
| 6:32814942   | <i>HLA-DRB5</i>     | REACTOME_DISORDERS_OF_TRANSMEMBRANE_TRANSPORTERS       |
| 17:42338993  | <i>FAM171A2</i>     | REACTOME_DISORDERS_OF_TRANSMEMBRANE_TRANSPORTERS       |
| 5:133710339  | <i>C5orf24</i>      | REACTOME_DNA_DAMAGE_BYPASS                             |
| 6:111628626  | <i>FYN</i>          | REACTOME_DNA_DAMAGE_BYPASS                             |
| 12:133206648 | <i>FBRSL1</i>       | REACTOME_DNA_DAMAGE_BYPASS                             |
| 12:133223685 | <i>FBRSL1</i>       | REACTOME_DNA_DAMAGE_BYPASS                             |
| 12:133225045 | <i>FBRSL1</i>       | REACTOME_DNA_DAMAGE_BYPASS                             |
| 16:53747395  | <i>CHD9</i>         | REACTOME_DNA_DAMAGE_REVERSAL                           |
| 16:53842518  | <i>CHD9</i>         | REACTOME_DNA_DAMAGE_REVERSAL                           |
| 17:7578671   | <i>V1NB1</i>        | REACTOME_DNA_DAMAGE_TELOMERE_STRESS_INDUCED_SENESCENCE |
| 6:133619778  | <i>RPS12</i>        | REACTOME_DNA_DOUBLE_STRAND_BREAK_REPAIR                |
| 6:133646494  | <i>RPS12</i>        | REACTOME_DNA_DOUBLE_STRAND_BREAK_REPAIR                |
| 6:133788110  | <i>RPS12</i>        | REACTOME_DNA_DOUBLE_STRAND_BREAK_REPAIR                |
| 12:133206648 | <i>FBRSL1</i>       | REACTOME_DNA_DOUBLE_STRAND_BREAK_REPAIR                |
| 12:133223685 | <i>FBRSL1</i>       | REACTOME_DNA_DOUBLE_STRAND_BREAK_REPAIR                |
| 12:133225045 | <i>FBRSL1</i>       | REACTOME_DNA_DOUBLE_STRAND_BREAK_REPAIR                |
| 17:7578671   | <i>V1NB1</i>        | REACTOME_DNA_DOUBLE_STRAND_BREAK_REPAIR                |
| 17:59922925  | <i>BRIP1</i>        | REACTOME_DNA_DOUBLE_STRAND_BREAK_REPAIR                |
| 6:133619778  | <i>RPS12</i>        | REACTOME_DNA_DOUBLE_STRAND_BREAK_RESPONSE              |
| 6:133646494  | <i>RPS12</i>        | REACTOME_DNA_DOUBLE_STRAND_BREAK_RESPONSE              |
| 6:133788110  | <i>RPS12</i>        | REACTOME_DNA_DOUBLE_STRAND_BREAK_RESPONSE              |
| 17:7578671   | <i>V1NB1</i>        | REACTOME_DNA_DOUBLE_STRAND_BREAK_RESPONSE              |
| 5:133710339  | <i>C5orf24</i>      | REACTOME_DNA_REPAIR                                    |
| 6:111628626  | <i>FYN</i>          | REACTOME_DNA_REPAIR                                    |
| 6:133619778  | <i>RPS12</i>        | REACTOME_DNA_REPAIR                                    |

|              |                 |                                                                      |
|--------------|-----------------|----------------------------------------------------------------------|
| 6:133646494  | <i>RPS12</i>    | REACTOME_DNA_REPAIR                                                  |
| 6:133788110  | <i>RPS12</i>    | REACTOME_DNA_REPAIR                                                  |
| 12:133206648 | <i>FBRSL1</i>   | REACTOME_DNA_REPAIR                                                  |
| 12:133223685 | <i>FBRSL1</i>   | REACTOME_DNA_REPAIR                                                  |
| 12:133225045 | <i>FBRSL1</i>   | REACTOME_DNA_REPAIR                                                  |
| 16:53747395  | <i>CHD9</i>     | REACTOME_DNA_REPAIR                                                  |
| 16:53842518  | <i>CHD9</i>     | REACTOME_DNA_REPAIR                                                  |
| 17:7578671   | <i>V1NB1</i>    | REACTOME_DNA_REPAIR                                                  |
| 17:59922925  | <i>BRIP1</i>    | REACTOME_DNA_REPAIR                                                  |
| 12:133206648 | <i>FBRSL1</i>   | REACTOME_DNA_REPLICATION_INITIATION                                  |
| 12:133223685 | <i>FBRSL1</i>   | REACTOME_DNA_REPLICATION_INITIATION                                  |
| 12:133225045 | <i>FBRSL1</i>   | REACTOME_DNA_REPLICATION_INITIATION                                  |
| 6:32814942   | <i>HLA-DRB5</i> | REACTOME_DNA_REPLICATION_PRE_INITIATION                              |
| 12:133206648 | <i>FBRSL1</i>   | REACTOME_DNA_REPLICATION_PRE_INITIATION                              |
| 12:133223685 | <i>FBRSL1</i>   | REACTOME_DNA_REPLICATION_PRE_INITIATION                              |
| 12:133225045 | <i>FBRSL1</i>   | REACTOME_DNA_REPLICATION_PRE_INITIATION                              |
| 20:5934513   | <i>CRLS1</i>    | REACTOME_DNA_REPLICATION_PRE_INITIATION                              |
| 20:5968737   | <i>CRLS1</i>    | REACTOME_DNA_REPLICATION_PRE_INITIATION                              |
| 20:5968964   | <i>CRLS1</i>    | REACTOME_DNA_REPLICATION_PRE_INITIATION                              |
| 6:32814942   | <i>HLA-DRB5</i> | REACTOME_DNA_REPLICATION                                             |
| 12:133206648 | <i>FBRSL1</i>   | REACTOME_DNA_REPLICATION                                             |
| 12:133223685 | <i>FBRSL1</i>   | REACTOME_DNA_REPLICATION                                             |
| 12:133225045 | <i>FBRSL1</i>   | REACTOME_DNA_REPLICATION                                             |
| 17:45215865  | <i>WNT3</i>     | REACTOME_DNA_REPLICATION                                             |
| 17:45244822  | <i>WNT3</i>     | REACTOME_DNA_REPLICATION                                             |
| 20:5934513   | <i>CRLS1</i>    | REACTOME_DNA_REPLICATION                                             |
| 20:5968737   | <i>CRLS1</i>    | REACTOME_DNA_REPLICATION                                             |
| 20:5968964   | <i>CRLS1</i>    | REACTOME_DNA_REPLICATION                                             |
| 20:5934513   | <i>CRLS1</i>    | REACTOME_DNA_STRAND_ELONGATION                                       |
| 20:5968737   | <i>CRLS1</i>    | REACTOME_DNA_STRAND_ELONGATION                                       |
| 20:5968964   | <i>CRLS1</i>    | REACTOME_DNA_STRAND_ELONGATION                                       |
| 6:32814942   | <i>HLA-DRB5</i> | REACTOME_DOWNSTREAM_SIGNALING_EVENTS_OF_B_CELL_RECEPTOR_BCR          |
| 10:103185542 | <i>GBF1</i>     | REACTOME_DOWNSTREAM_SIGNALING_EVENTS_OF_B_CELL_RECEPTOR_BCR          |
| 10:103308244 | <i>GBF1</i>     | REACTOME_DOWNSTREAM_SIGNALING_EVENTS_OF_B_CELL_RECEPTOR_BCR          |
| 17:40392358  | <i>RETREG3</i>  | REACTOME_DOWNSTREAM_SIGNAL_TRANSDUCTION                              |
| 6:32602372   | <i>HLA-DRB5</i> | REACTOME_DOWNSTREAM_TCR_SIGNALING                                    |
| 6:32814942   | <i>HLA-DRB5</i> | REACTOME_DOWNSTREAM_TCR_SIGNALING                                    |
| 10:103185542 | <i>GBF1</i>     | REACTOME_DOWNSTREAM_TCR_SIGNALING                                    |
| 10:103308244 | <i>GBF1</i>     | REACTOME_DOWNSTREAM_TCR_SIGNALING                                    |
| 12:133206648 | <i>FBRSL1</i>   | REACTOME_DUAL_INCISION_IN_GG_NER                                     |
| 12:133223685 | <i>FBRSL1</i>   | REACTOME_DUAL_INCISION_IN_GG_NER                                     |
| 12:133225045 | <i>FBRSL1</i>   | REACTOME_DUAL_INCISION_IN_GG_NER                                     |
| 12:133206648 | <i>FBRSL1</i>   | REACTOME_DUAL_INCISION_IN_TC_NER                                     |
| 12:133223685 | <i>FBRSL1</i>   | REACTOME_DUAL_INCISION_IN_TC_NER                                     |
| 12:133225045 | <i>FBRSL1</i>   | REACTOME_DUAL_INCISION_IN_TC_NER                                     |
| 20:5934513   | <i>CRLS1</i>    | REACTOME_E2F_ENABLED_INHIBITION_OF_PRE_REPLICATION_COMPLEX_FORMATION |
| 20:5968737   | <i>CRLS1</i>    | REACTOME_E2F_ENABLED_INHIBITION_OF_PRE_REPLICATION_COMPLEX_FORMATION |
| 20:5968964   | <i>CRLS1</i>    | REACTOME_E2F_ENABLED_INHIBITION_OF_PRE_REPLICATION_COMPLEX_FORMATION |
| 20:5934513   | <i>CRLS1</i>    | REACTOME_E2F_MEDIATED_REGULATION_OF_DNA_REPLICATION                  |
| 20:5968737   | <i>CRLS1</i>    | REACTOME_E2F_MEDIATED_REGULATION_OF_DNA_REPLICATION                  |
| 20:5968964   | <i>CRLS1</i>    | REACTOME_E2F_MEDIATED_REGULATION_OF_DNA_REPLICATION                  |
| 5:133710339  | <i>C5orf24</i>  | REACTOME_E3_UBIQUITIN_LIGASES_UBIQUITINATE_TARGET_PROTEINS           |
| 3:49162284   | <i>IP6K2</i>    | REACTOME_ECM_PROTEOGLYCANS                                           |

|             |                 |                                                                 |
|-------------|-----------------|-----------------------------------------------------------------|
| 3:49162583  | <i>IP6K2</i>    | REACTOME_ECM_PROTEOGLYCANS                                      |
| 3:49561208  | <i>IP6K2</i>    | REACTOME_ECM_PROTEOGLYCANS                                      |
| 6:32031904  | <i>HLA-DRB5</i> | REACTOME_ECM_PROTEOGLYCANS                                      |
| 6:32062687  | <i>HLA-DRB5</i> | REACTOME_ECM_PROTEOGLYCANS                                      |
| 6:112561154 | <i>FYN</i>      | REACTOME_ECM_PROTEOGLYCANS                                      |
| 10:15569598 | <i>ITGA8</i>    | REACTOME_ECM_PROTEOGLYCANS                                      |
| 10:15652368 | <i>ITGA8</i>    | REACTOME_ECM_PROTEOGLYCANS                                      |
| 16:31370452 | <i>SETD1A</i>   | REACTOME_ECM_PROTEOGLYCANS                                      |
| 9:17579690  | <i>SH3GL2_2</i> | REACTOME_EGFR_DOWNREGULATION                                    |
| 9:17609302  | <i>SH3GL2_2</i> | REACTOME_EGFR_DOWNREGULATION                                    |
| 9:17627444  | <i>SH3GL2_2</i> | REACTOME_EGFR_DOWNREGULATION                                    |
| 9:17710876  | <i>SH3GL2_2</i> | REACTOME_EGFR_DOWNREGULATION                                    |
| 9:17732590  | <i>SH3GL2_2</i> | REACTOME_EGFR_DOWNREGULATION                                    |
| 9:17737514  | <i>SH3GL2_2</i> | REACTOME_EGFR_DOWNREGULATION                                    |
| 9:17758945  | <i>SH3GL2_2</i> | REACTOME_EGFR_DOWNREGULATION                                    |
| 8:23190941  | <i>BIN3</i>     | REACTOME_ELASTIC_FIBRE_FORMATION                                |
| 8:23212542  | <i>BIN3</i>     | REACTOME_ELASTIC_FIBRE_FORMATION                                |
| 8:23223713  | <i>BIN3</i>     | REACTOME_ELASTIC_FIBRE_FORMATION                                |
| 10:15569598 | <i>ITGA8</i>    | REACTOME_ELASTIC_FIBRE_FORMATION                                |
| 10:15652368 | <i>ITGA8</i>    | REACTOME_ELASTIC_FIBRE_FORMATION                                |
| 14:75057014 | <i>RPS6KL1</i>  | REACTOME_ELASTIC_FIBRE_FORMATION                                |
| 8:17125768  | <i>FGF20</i>    | REACTOME_ENDOSOMAL_SORTING_COMPLEX_REQUIRED_FOR_TRANSPORT_ESCRT |
| 6:29798642  | <i>TRIM40</i>   | REACTOME_ENDOSOMAL_VACUOLAR_PATHWAY                             |
| 13:49914395 | <i>CAB39L</i>   | REACTOME_ENERGY_DEPENDENT_REGULATION_OF_MTOR_BY_LKB1_AMPK       |
| 13:49927732 | <i>CAB39L</i>   | REACTOME_ENERGY_DEPENDENT_REGULATION_OF_MTOR_BY_LKB1_AMPK       |
| 13:49948786 | <i>CAB39L</i>   | REACTOME_ENERGY_DEPENDENT_REGULATION_OF_MTOR_BY_LKB1_AMPK       |
| 13:49960054 | <i>CAB39L</i>   | REACTOME_ENERGY_DEPENDENT_REGULATION_OF_MTOR_BY_LKB1_AMPK       |
| 13:49977462 | <i>CAB39L</i>   | REACTOME_ENERGY_DEPENDENT_REGULATION_OF_MTOR_BY_LKB1_AMPK       |
| 3:49406095  | <i>IP6K2</i>    | REACTOME_EPHA_MEDIATED_GROWTH_CONE_COLLAPSE                     |
| 3:49424231  | <i>IP6K2</i>    | REACTOME_EPHA_MEDIATED_GROWTH_CONE_COLLAPSE                     |
| 3:49450137  | <i>IP6K2</i>    | REACTOME_EPHA_MEDIATED_GROWTH_CONE_COLLAPSE                     |
| 6:112009427 | <i>FYN</i>      | REACTOME_EPHA_MEDIATED_GROWTH_CONE_COLLAPSE                     |
| 6:112056759 | <i>FYN</i>      | REACTOME_EPHA_MEDIATED_GROWTH_CONE_COLLAPSE                     |
| 6:112151452 | <i>FYN</i>      | REACTOME_EPHA_MEDIATED_GROWTH_CONE_COLLAPSE                     |
| 3:49406095  | <i>IP6K2</i>    | REACTOME_EPHB_MEDIATED_FORWARD_SIGNALING                        |
| 3:49424231  | <i>IP6K2</i>    | REACTOME_EPHB_MEDIATED_FORWARD_SIGNALING                        |
| 3:49450137  | <i>IP6K2</i>    | REACTOME_EPHB_MEDIATED_FORWARD_SIGNALING                        |
| 6:112009427 | <i>FYN</i>      | REACTOME_EPHB_MEDIATED_FORWARD_SIGNALING                        |
| 6:112056759 | <i>FYN</i>      | REACTOME_EPHB_MEDIATED_FORWARD_SIGNALING                        |
| 6:112151452 | <i>FYN</i>      | REACTOME_EPHB_MEDIATED_FORWARD_SIGNALING                        |
| 1:227067656 | <i>ITPKB</i>    | REACTOME_EPH_EPHRIN_MEDIATED_REPULSION_OF_CELLS                 |
| 6:112009427 | <i>FYN</i>      | REACTOME_EPH_EPHRIN_MEDIATED_REPULSION_OF_CELLS                 |
| 6:112056759 | <i>FYN</i>      | REACTOME_EPH_EPHRIN_MEDIATED_REPULSION_OF_CELLS                 |
| 6:112151452 | <i>FYN</i>      | REACTOME_EPH_EPHRIN_MEDIATED_REPULSION_OF_CELLS                 |
| 1:227067656 | <i>ITPKB</i>    | REACTOME_EPH_EPHRIN_SIGNALING                                   |
| 3:49406095  | <i>IP6K2</i>    | REACTOME_EPH_EPHRIN_SIGNALING                                   |
| 3:49424231  | <i>IP6K2</i>    | REACTOME_EPH_EPHRIN_SIGNALING                                   |
| 3:49450137  | <i>IP6K2</i>    | REACTOME_EPH_EPHRIN_SIGNALING                                   |
| 6:112009427 | <i>FYN</i>      | REACTOME_EPH_EPHRIN_SIGNALING                                   |
| 6:112056759 | <i>FYN</i>      | REACTOME_EPH_EPHRIN_SIGNALING                                   |
| 6:112151452 | <i>FYN</i>      | REACTOME_EPH_EPHRIN_SIGNALING                                   |
| 6:112009427 | <i>FYN</i>      | REACTOME_EPHRIN_SIGNALING                                       |
| 6:112056759 | <i>FYN</i>      | REACTOME_EPHRIN_SIGNALING                                       |

|              |                     |                                                                      |
|--------------|---------------------|----------------------------------------------------------------------|
| 6:112151452  | <i>FYN</i>          | REACTOME_EPHRIN_SIGNALING                                            |
| 6:31862876   | <i>HLA-DRB5</i>     | REACTOME_EPIGENETIC_REGULATION_OF_GENE_EXPRESSION                    |
| 6:33381459   | <i>HLA-DRB5</i>     | REACTOME_EPIGENETIC_REGULATION_OF_GENE_EXPRESSION                    |
| 3:49406095   | <i>IP6K2</i>        | REACTOME_ERBB2_REGULATES_CELL_MOTILITY                               |
| 3:49424231   | <i>IP6K2</i>        | REACTOME_ERBB2_REGULATES_CELL_MOTILITY                               |
| 3:49450137   | <i>IP6K2</i>        | REACTOME_ERBB2_REGULATES_CELL_MOTILITY                               |
| 6:31862876   | <i>HLA-DRB5</i>     | REACTOME_ERCC6_CSB_AND_EHMT2_G9A_POSITIVELY_REGULATE_RRNA_EXPRESSION |
| 6:32151443   | <i>HLA-DRB5</i>     | REACTOME_ER_QUALITY_CONTROL_COMPARTMENT_ERQC                         |
| 3:121411876  | <i>KPNA1</i>        | REACTOME_ER_TO_GOLGI_ANTEROGRADE_TRANSPORT                           |
| 3:121412702  | <i>KPNA1</i>        | REACTOME_ER_TO_GOLGI_ANTEROGRADE_TRANSPORT                           |
| 4:76695927   | <i>FAM47E-STBD1</i> | REACTOME_ER_TO_GOLGI_ANTEROGRADE_TRANSPORT                           |
| 4:113938109  | <i>CAMK2D</i>       | REACTOME_ER_TO_GOLGI_ANTEROGRADE_TRANSPORT                           |
| 4:114077386  | <i>CAMK2D</i>       | REACTOME_ER_TO_GOLGI_ANTEROGRADE_TRANSPORT                           |
| 4:114217997  | <i>CAMK2D</i>       | REACTOME_ER_TO_GOLGI_ANTEROGRADE_TRANSPORT                           |
| 10:104005410 | <i>GBF1</i>         | REACTOME_ER_TO_GOLGI_ANTEROGRADE_TRANSPORT                           |
| 10:104034550 | <i>GBF1</i>         | REACTOME_ER_TO_GOLGI_ANTEROGRADE_TRANSPORT                           |
| 10:104258303 | <i>GBF1</i>         | REACTOME_ER_TO_GOLGI_ANTEROGRADE_TRANSPORT                           |
| 10:121683206 | <i>INPP5F</i>       | REACTOME_ER_TO_GOLGI_ANTEROGRADE_TRANSPORT                           |
| 10:121686714 | <i>INPP5F</i>       | REACTOME_ER_TO_GOLGI_ANTEROGRADE_TRANSPORT                           |
| 10:121689030 | <i>INPP5F</i>       | REACTOME_ER_TO_GOLGI_ANTEROGRADE_TRANSPORT                           |
| 17:44800946  | <i>WNT3</i>         | REACTOME_ER_TO_GOLGI_ANTEROGRADE_TRANSPORT                           |
| 17:44833217  | <i>WNT3</i>         | REACTOME_ER_TO_GOLGI_ANTEROGRADE_TRANSPORT                           |
| 17:45059032  | <i>WNT3</i>         | REACTOME_ER_TO_GOLGI_ANTEROGRADE_TRANSPORT                           |
| 17:45089680  | <i>WNT3</i>         | REACTOME_ER_TO_GOLGI_ANTEROGRADE_TRANSPORT                           |
| 17:42338993  | <i>FAM171A2</i>     | REACTOME_ERYTHROCYTES_TAKE_UP_OXYGEN_AND_RELEASE_CARBON_DIOXIDE      |
| 17:40392358  | <i>RETREG3</i>      | REACTOME_ERYTHROPOIETIN_ACTIVATES_STATS                              |
| 14:38061742  | <i>MIPOL1</i>       | REACTOME_ESR_MEDIATED_SIGNALING                                      |
| 14:38061742  | <i>MIPOL1</i>       | REACTOME_ESTROGEN_DEPENDENT_GENE_EXPRESSION                          |
| 17:7479140   | <i>V1NB1</i>        | REACTOME_EUKARYOTIC_TRANSLATION_INITIATION                           |
| 17:7480325   | <i>V1NB1</i>        | REACTOME_EUKARYOTIC_TRANSLATION_INITIATION                           |
| 12:133206648 | <i>FBRSL1</i>       | REACTOME_EXTENSION_OF_TELOMERES                                      |
| 12:133223685 | <i>FBRSL1</i>       | REACTOME_EXTENSION_OF_TELOMERES                                      |
| 12:133225045 | <i>FBRSL1</i>       | REACTOME_EXTENSION_OF_TELOMERES                                      |
| 1:155027082  | <i>GBAP1</i>        | REACTOME_EXTRACELLULAR_MATRIX_ORGANIZATION                           |
| 1:155033317  | <i>GBAP1</i>        | REACTOME_EXTRACELLULAR_MATRIX_ORGANIZATION                           |
| 3:49162284   | <i>IP6K2</i>        | REACTOME_EXTRACELLULAR_MATRIX_ORGANIZATION                           |
| 3:49162583   | <i>IP6K2</i>        | REACTOME_EXTRACELLULAR_MATRIX_ORGANIZATION                           |
| 3:49561208   | <i>IP6K2</i>        | REACTOME_EXTRACELLULAR_MATRIX_ORGANIZATION                           |
| 6:30850582   | <i>TRIM40</i>       | REACTOME_EXTRACELLULAR_MATRIX_ORGANIZATION                           |
| 6:32031904   | <i>HLA-DRB5</i>     | REACTOME_EXTRACELLULAR_MATRIX_ORGANIZATION                           |
| 6:32062687   | <i>HLA-DRB5</i>     | REACTOME_EXTRACELLULAR_MATRIX_ORGANIZATION                           |
| 6:33153528   | <i>HLA-DRB5</i>     | REACTOME_EXTRACELLULAR_MATRIX_ORGANIZATION                           |
| 6:112561154  | <i>FYN</i>          | REACTOME_EXTRACELLULAR_MATRIX_ORGANIZATION                           |
| 8:11712443   | <i>CTSB</i>         | REACTOME_EXTRACELLULAR_MATRIX_ORGANIZATION                           |
| 8:23190941   | <i>BIN3</i>         | REACTOME_EXTRACELLULAR_MATRIX_ORGANIZATION                           |
| 8:23212542   | <i>BIN3</i>         | REACTOME_EXTRACELLULAR_MATRIX_ORGANIZATION                           |
| 8:23223713   | <i>BIN3</i>         | REACTOME_EXTRACELLULAR_MATRIX_ORGANIZATION                           |
| 10:15569598  | <i>ITGA8</i>        | REACTOME_EXTRACELLULAR_MATRIX_ORGANIZATION                           |
| 10:15652368  | <i>ITGA8</i>        | REACTOME_EXTRACELLULAR_MATRIX_ORGANIZATION                           |
| 11:133947732 | <i>IGSF9B</i>       | REACTOME_EXTRACELLULAR_MATRIX_ORGANIZATION                           |
| 14:75057014  | <i>RPS6KL1</i>      | REACTOME_EXTRACELLULAR_MATRIX_ORGANIZATION                           |
| 16:30510571  | <i>SETD1A</i>       | REACTOME_EXTRACELLULAR_MATRIX_ORGANIZATION                           |
| 16:30516492  | <i>SETD1A</i>       | REACTOME_EXTRACELLULAR_MATRIX_ORGANIZATION                           |

|              |                     |                                                                                       |
|--------------|---------------------|---------------------------------------------------------------------------------------|
| 16:30520856  | <i>SETD1A</i>       | REACTOME_EXTRACELLULAR_MATRIX_ORGANIZATION                                            |
| 16:31370452  | <i>SETD1A</i>       | REACTOME_EXTRACELLULAR_MATRIX_ORGANIZATION                                            |
| 3:48835245   | <i>IP6K2</i>        | REACTOME_FACTORS_INVOLVED_IN_MEGAKARYOCYTE_DEVELOPMENT_AND_PLATELET_PRODUCTION        |
| 12:39759090  | <i>LRRK2_2</i>      | REACTOME_FACTORS_INVOLVED_IN_MEGAKARYOCYTE_DEVELOPMENT_AND_PLATELET_PRODUCTION        |
| 17:7578671   | <i>V1NB1</i>        | REACTOME_FACTORS_INVOLVED_IN_MEGAKARYOCYTE_DEVELOPMENT_AND_PLATELET_PRODUCTION        |
| 17:43021962  | <i>CRHR1_2</i>      | REACTOME_FACTORS_INVOLVED_IN_MEGAKARYOCYTE_DEVELOPMENT_AND_PLATELET_PRODUCTION        |
| 5:60053220   | <i>ELOVL7</i>       | REACTOME_FATTY_ACID_METABOLISM                                                        |
| 6:32126002   | <i>HLA-DRB5</i>     | REACTOME_FATTY_ACID_METABOLISM                                                        |
| 17:7983799   | <i>V1NB1</i>        | REACTOME_FATTY_ACID_METABOLISM                                                        |
| 17:8019125   | <i>V1NB1</i>        | REACTOME_FATTY_ACID_METABOLISM                                                        |
| 19:3156505   | <i>SPPL2B</i>       | REACTOME_FATTY_ACIDS_BOUND_TO_GPR40_FFAR1_REGULATE_INSULIN_SECRETION                  |
| 5:60053220   | <i>ELOVL7</i>       | REACTOME_FATTY_ACYL_COA_BIOSYNTHESIS                                                  |
| 6:32126002   | <i>HLA-DRB5</i>     | REACTOME_FATTY_ACYL_COA_BIOSYNTHESIS                                                  |
| 6:32814942   | <i>HLA-DRB5</i>     | REACTOME_FBXL7_DOWN_REGULATES_AURKA_DURING_MITOTIC_ENTRY_AND_IN_EARLY_MITOSIS         |
| 6:32814942   | <i>HLA-DRB5</i>     | REACTOME_FC_EPSILON_RECEPTOR_FCERI_SIGNALING                                          |
| 6:112009427  | <i>FYN</i>          | REACTOME_FC_EPSILON_RECEPTOR_FCERI_SIGNALING                                          |
| 6:112056759  | <i>FYN</i>          | REACTOME_FC_EPSILON_RECEPTOR_FCERI_SIGNALING                                          |
| 6:112151452  | <i>FYN</i>          | REACTOME_FC_EPSILON_RECEPTOR_FCERI_SIGNALING                                          |
| 10:103185542 | <i>GBF1</i>         | REACTOME_FC_EPSILON_RECEPTOR_FCERI_SIGNALING                                          |
| 10:103308244 | <i>GBF1</i>         | REACTOME_FC_EPSILON_RECEPTOR_FCERI_SIGNALING                                          |
| 6:32814942   | <i>HLA-DRB5</i>     | REACTOME_FCERI_MEDIATED_NF_KB_ACTIVATION                                              |
| 10:103185542 | <i>GBF1</i>         | REACTOME_FCERI_MEDIATED_NF_KB_ACTIVATION                                              |
| 10:103308244 | <i>GBF1</i>         | REACTOME_FCERI_MEDIATED_NF_KB_ACTIVATION                                              |
| 6:112009427  | <i>FYN</i>          | REACTOME_FCGAMMA_RECEPTOR_FCGR_DEPENDENT_PHAGOCYTOSIS                                 |
| 6:112056759  | <i>FYN</i>          | REACTOME_FCGAMMA_RECEPTOR_FCGR_DEPENDENT_PHAGOCYTOSIS                                 |
| 6:112151452  | <i>FYN</i>          | REACTOME_FCGAMMA_RECEPTOR_FCGR_DEPENDENT_PHAGOCYTOSIS                                 |
| 6:112009427  | <i>FYN</i>          | REACTOME_FCGR_ACTIVATION                                                              |
| 6:112056759  | <i>FYN</i>          | REACTOME_FCGR_ACTIVATION                                                              |
| 6:112151452  | <i>FYN</i>          | REACTOME_FCGR_ACTIVATION                                                              |
| 5:134315853  | <i>C5orf24</i>      | REACTOME_FERTILIZATION                                                                |
| 17:40392358  | <i>RETREG3</i>      | REACTOME_FGFR1_MUTANT_RECEPTOR_ACTIVATION                                             |
| 11:82582134  | <i>DLG2</i>         | REACTOME_FORMATION_OF_FIBRIN_CLOT_CLOTTING_CASCADE                                    |
| 11:82648357  | <i>DLG2</i>         | REACTOME_FORMATION_OF_FIBRIN_CLOT_CLOTTING_CASCADE                                    |
| 2:135708115  | <i>TMEM163</i>      | REACTOME_FORMATION_OF_HIV_ELONGATION_COMPLEX_IN_THE_ABSENCE_OF_HIV_TAT                |
| 6:31925679   | <i>HLA-DRB5</i>     | REACTOME_FORMATION_OF_HIV_ELONGATION_COMPLEX_IN_THE_ABSENCE_OF_HIV_TAT                |
| 17:7578671   | <i>V1NB1</i>        | REACTOME_FORMATION_OF_SENESCENCE_ASSOCIATED_HETEROCHROMATIN_FOCI_SAHF                 |
| 19:3022354   | <i>SPPL2B</i>       | REACTOME_FORMATION_OF_THE_BETA_CATENIN:TCF_TRANSACTIVATING_COMPLEX                    |
| 19:3036350   | <i>SPPL2B</i>       | REACTOME_FORMATION_OF_THE_BETA_CATENIN:TCF_TRANSACTIVATING_COMPLEX                    |
| 17:39883520  | <i>RETREG3</i>      | REACTOME_FORMATION_OF_THE_CORNIFIED_ENVELOPE                                          |
| 6:31925679   | <i>HLA-DRB5</i>     | REACTOME_FORMATION_OF_THE_EARLY_ELONGATION_COMPLEX                                    |
| 4:78175384   | <i>FAM47E-STBD1</i> | REACTOME_FOXO_MEDIATED_TRANSCRIPTION_OF_CELL_CYCLE_GENES                              |
| 17:41056283  | <i>RETREG3</i>      | REACTOME_FOXO_MEDIATED_TRANSCRIPTION_OF_OXIDATIVE_STRESS_METABOLIC_AND_NEURONAL_GENES |
| 4:78175384   | <i>FAM47E-STBD1</i> | REACTOME_FOXO_MEDIATED_TRANSCRIPTION                                                  |
| 17:41056283  | <i>RETREG3</i>      | REACTOME_FOXO_MEDIATED_TRANSCRIPTION                                                  |
| 19:3156505   | <i>SPPL2B</i>       | REACTOME_FREE_FATTY_ACIDS_REGULATE_INSULIN_SECRETION                                  |
| 3:48199695   | <i>IP6K2</i>        | REACTOME_G0_AND_EARLY_G1                                                              |
| 3:48214438   | <i>IP6K2</i>        | REACTOME_G0_AND_EARLY_G1                                                              |
| 21:38740824  | <i>DYRK1A</i>       | REACTOME_G0_AND_EARLY_G1                                                              |
| 21:38770530  | <i>DYRK1A</i>       | REACTOME_G0_AND_EARLY_G1                                                              |
| 3:48199695   | <i>IP6K2</i>        | REACTOME_G1_S_DNA_DAMAGE_CHECKPOINTS                                                  |
| 3:48214438   | <i>IP6K2</i>        | REACTOME_G1_S_DNA_DAMAGE_CHECKPOINTS                                                  |
| 6:32814942   | <i>HLA-DRB5</i>     | REACTOME_G1_S_DNA_DAMAGE_CHECKPOINTS                                                  |
| 17:7578671   | <i>V1NB1</i>        | REACTOME_G1_S_DNA_DAMAGE_CHECKPOINTS                                                  |

|              |                 |                                          |
|--------------|-----------------|------------------------------------------|
| 3:48199695   | <i>IP6K2</i>    | REACTOME_G1_S_SPECIFIC_TRANSCRIPTION     |
| 3:48214438   | <i>IP6K2</i>    | REACTOME_G1_S_SPECIFIC_TRANSCRIPTION     |
| 17:76177567  | <i>DNAH17</i>   | REACTOME_G1_S_SPECIFIC_TRANSCRIPTION     |
| 3:48199695   | <i>IP6K2</i>    | REACTOME_G2_M_CHECKPOINTS                |
| 3:48214438   | <i>IP6K2</i>    | REACTOME_G2_M_CHECKPOINTS                |
| 6:32814942   | <i>HLA-DRB5</i> | REACTOME_G2_M_CHECKPOINTS                |
| 17:7578671   | <i>V1NB1</i>    | REACTOME_G2_M_CHECKPOINTS                |
| 17:59922925  | <i>BRIP1</i>    | REACTOME_G2_M_CHECKPOINTS                |
| 20:5934513   | <i>CRLS1</i>    | REACTOME_G2_M_CHECKPOINTS                |
| 20:5968737   | <i>CRLS1</i>    | REACTOME_G2_M_CHECKPOINTS                |
| 20:5968964   | <i>CRLS1</i>    | REACTOME_G2_M_CHECKPOINTS                |
| 17:7578671   | <i>V1NB1</i>    | REACTOME_G2_M_DNA_DAMAGE_CHECKPOINT      |
| 17:59922925  | <i>BRIP1</i>    | REACTOME_G2_M_DNA_DAMAGE_CHECKPOINT      |
| 3:123057397  | <i>KPNA1</i>    | REACTOME_GABA_B_RECEPTOR_ACTIVATION      |
| 6:29579544   | <i>TRIM40</i>   | REACTOME_GABA_B_RECEPTOR_ACTIVATION      |
| 21:39197323  | <i>DYRK1A</i>   | REACTOME_GABA_B_RECEPTOR_ACTIVATION      |
| 3:123057397  | <i>KPNA1</i>    | REACTOME_GABA_RECEPTOR_ACTIVATION        |
| 6:29579544   | <i>TRIM40</i>   | REACTOME_GABA_RECEPTOR_ACTIVATION        |
| 21:39197323  | <i>DYRK1A</i>   | REACTOME_GABA_RECEPTOR_ACTIVATION        |
| 1:155975202  | <i>GBAP1</i>    | REACTOME_G_ALPHA_12_13_SIGNALLING_EVENTS |
| 3:49406095   | <i>IP6K2</i>    | REACTOME_G_ALPHA_12_13_SIGNALLING_EVENTS |
| 3:49424231   | <i>IP6K2</i>    | REACTOME_G_ALPHA_12_13_SIGNALLING_EVENTS |
| 3:49450137   | <i>IP6K2</i>    | REACTOME_G_ALPHA_12_13_SIGNALLING_EVENTS |
| 2:169999639  | <i>STK39</i>    | REACTOME_G_ALPHA_I_SIGNALLING_EVENTS     |
| 2:170028024  | <i>STK39</i>    | REACTOME_G_ALPHA_I_SIGNALLING_EVENTS     |
| 3:48835245   | <i>IP6K2</i>    | REACTOME_G_ALPHA_I_SIGNALLING_EVENTS     |
| 3:123057397  | <i>KPNA1</i>    | REACTOME_G_ALPHA_I_SIGNALLING_EVENTS     |
| 3:151090424  | <i>MED12L</i>   | REACTOME_G_ALPHA_I_SIGNALLING_EVENTS     |
| 3:151099733  | <i>MED12L</i>   | REACTOME_G_ALPHA_I_SIGNALLING_EVENTS     |
| 3:151599393  | <i>MED12L</i>   | REACTOME_G_ALPHA_I_SIGNALLING_EVENTS     |
| 4:114424939  | <i>CAMK2D</i>   | REACTOME_G_ALPHA_I_SIGNALLING_EVENTS     |
| 5:59236972   | <i>ELOVL7</i>   | REACTOME_G_ALPHA_I_SIGNALLING_EVENTS     |
| 5:59665659   | <i>ELOVL7</i>   | REACTOME_G_ALPHA_I_SIGNALLING_EVENTS     |
| 5:59705316   | <i>ELOVL7</i>   | REACTOME_G_ALPHA_I_SIGNALLING_EVENTS     |
| 5:59736085   | <i>ELOVL7</i>   | REACTOME_G_ALPHA_I_SIGNALLING_EVENTS     |
| 6:29579544   | <i>TRIM40</i>   | REACTOME_G_ALPHA_I_SIGNALLING_EVENTS     |
| 10:15199347  | <i>ITGA8</i>    | REACTOME_G_ALPHA_I_SIGNALLING_EVENTS     |
| 10:121295884 | <i>INPP5F</i>   | REACTOME_G_ALPHA_I_SIGNALLING_EVENTS     |
| 12:123110365 | <i>HIP1R</i>    | REACTOME_G_ALPHA_I_SIGNALLING_EVENTS     |
| 12:123110785 | <i>HIP1R</i>    | REACTOME_G_ALPHA_I_SIGNALLING_EVENTS     |
| 12:123139394 | <i>HIP1R</i>    | REACTOME_G_ALPHA_I_SIGNALLING_EVENTS     |
| 12:123155263 | <i>HIP1R</i>    | REACTOME_G_ALPHA_I_SIGNALLING_EVENTS     |
| 12:123194636 | <i>HIP1R</i>    | REACTOME_G_ALPHA_I_SIGNALLING_EVENTS     |
| 17:43132290  | <i>CRHR1_2</i>  | REACTOME_G_ALPHA_I_SIGNALLING_EVENTS     |
| 10:121114292 | <i>INPP5F</i>   | REACTOME_G_ALPHA_Q_SIGNALLING_EVENTS     |
| 10:121138071 | <i>INPP5F</i>   | REACTOME_G_ALPHA_Q_SIGNALLING_EVENTS     |
| 10:121191186 | <i>INPP5F</i>   | REACTOME_G_ALPHA_Q_SIGNALLING_EVENTS     |
| 14:88472612  | <i>GALC</i>     | REACTOME_G_ALPHA_Q_SIGNALLING_EVENTS     |
| 19:3156505   | <i>SPPL2B</i>   | REACTOME_G_ALPHA_Q_SIGNALLING_EVENTS     |
| 3:123057397  | <i>KPNA1</i>    | REACTOME_G_ALPHA_S_SIGNALLING_EVENTS     |
| 5:59236972   | <i>ELOVL7</i>   | REACTOME_G_ALPHA_S_SIGNALLING_EVENTS     |
| 5:59665659   | <i>ELOVL7</i>   | REACTOME_G_ALPHA_S_SIGNALLING_EVENTS     |
| 5:59705316   | <i>ELOVL7</i>   | REACTOME_G_ALPHA_S_SIGNALLING_EVENTS     |

|              |                     |                                                                  |
|--------------|---------------------|------------------------------------------------------------------|
| 5:59736085   | <i>ELOVL7</i>       | REACTOME_G_ALPHA_S_SIGNALLING_EVENTS                             |
| 6:29351969   | <i>TRIM40</i>       | REACTOME_G_ALPHA_S_SIGNALLING_EVENTS                             |
| 6:29373213   | <i>TRIM40</i>       | REACTOME_G_ALPHA_S_SIGNALLING_EVENTS                             |
| 6:29407378   | <i>TRIM40</i>       | REACTOME_G_ALPHA_S_SIGNALLING_EVENTS                             |
| 6:29412222   | <i>TRIM40</i>       | REACTOME_G_ALPHA_S_SIGNALLING_EVENTS                             |
| 10:121114292 | <i>INPP5F</i>       | REACTOME_G_ALPHA_S_SIGNALLING_EVENTS                             |
| 10:121138071 | <i>INPP5F</i>       | REACTOME_G_ALPHA_S_SIGNALLING_EVENTS                             |
| 10:121191186 | <i>INPP5F</i>       | REACTOME_G_ALPHA_S_SIGNALLING_EVENTS                             |
| 17:43744203  | <i>CRHR1_2</i>      | REACTOME_G_ALPHA_S_SIGNALLING_EVENTS                             |
| 17:43748712  | <i>CRHR1_2</i>      | REACTOME_G_ALPHA_S_SIGNALLING_EVENTS                             |
| 17:43767804  | <i>CRHR1_2</i>      | REACTOME_G_ALPHA_S_SIGNALLING_EVENTS                             |
| 17:43784228  | <i>CRHR1_2</i>      | REACTOME_G_ALPHA_S_SIGNALLING_EVENTS                             |
| 17:43791502  | <i>CRHR1_2</i>      | REACTOME_G_ALPHA_S_SIGNALLING_EVENTS                             |
| 17:43843861  | <i>CRHR1_2</i>      | REACTOME_G_ALPHA_S_SIGNALLING_EVENTS                             |
| 17:43847503  | <i>CRHR1_2</i>      | REACTOME_G_ALPHA_S_SIGNALLING_EVENTS                             |
| 3:123057397  | <i>KPNA1</i>        | REACTOME_G_ALPHA_Z_SIGNALLING_EVENTS                             |
| 12:133206648 | <i>FBRSL1</i>       | REACTOME_GAP_FILLING_DNA_REPAIR_SYNTHESIS_AND_LIGATION_IN_GG_NER |
| 12:133223685 | <i>FBRSL1</i>       | REACTOME_GAP_FILLING_DNA_REPAIR_SYNTHESIS_AND_LIGATION_IN_GG_NER |
| 12:133225045 | <i>FBRSL1</i>       | REACTOME_GAP_FILLING_DNA_REPAIR_SYNTHESIS_AND_LIGATION_IN_GG_NER |
| 3:49406095   | <i>IP6K2</i>        | REACTOME_G_BETA:GAMMA_SIGNALLING_THROUGH_PI3KGAMMA               |
| 3:49424231   | <i>IP6K2</i>        | REACTOME_G_BETA:GAMMA_SIGNALLING_THROUGH_PI3KGAMMA               |
| 3:49450137   | <i>IP6K2</i>        | REACTOME_G_BETA:GAMMA_SIGNALLING_THROUGH_PI3KGAMMA               |
| 1:227754686  | <i>ITPKB</i>        | REACTOME_GENE_EXPRESSION_TRANSCRIPTION                           |
| 1:227804041  | <i>ITPKB</i>        | REACTOME_GENE_EXPRESSION_TRANSCRIPTION                           |
| 1:231698854  | <i>SIPA1L2</i>      | REACTOME_GENE_EXPRESSION_TRANSCRIPTION                           |
| 2:135708115  | <i>TMEM163</i>      | REACTOME_GENE_EXPRESSION_TRANSCRIPTION                           |
| 4:78175384   | <i>FAM47E-STBD1</i> | REACTOME_GENE_EXPRESSION_TRANSCRIPTION                           |
| 4:114424939  | <i>CAMK2D</i>       | REACTOME_GENE_EXPRESSION_TRANSCRIPTION                           |
| 6:28117331   | <i>LOC100131289</i> | REACTOME_GENE_EXPRESSION_TRANSCRIPTION                           |
| 6:28223680   | <i>LOC100131289</i> | REACTOME_GENE_EXPRESSION_TRANSCRIPTION                           |
| 6:31862876   | <i>HLA-DRB5</i>     | REACTOME_GENE_EXPRESSION_TRANSCRIPTION                           |
| 6:31925679   | <i>HLA-DRB5</i>     | REACTOME_GENE_EXPRESSION_TRANSCRIPTION                           |
| 6:32186193   | <i>HLA-DRB5</i>     | REACTOME_GENE_EXPRESSION_TRANSCRIPTION                           |
| 6:32814942   | <i>HLA-DRB5</i>     | REACTOME_GENE_EXPRESSION_TRANSCRIPTION                           |
| 6:32941506   | <i>HLA-DRB5</i>     | REACTOME_GENE_EXPRESSION_TRANSCRIPTION                           |
| 6:33381459   | <i>HLA-DRB5</i>     | REACTOME_GENE_EXPRESSION_TRANSCRIPTION                           |
| 8:11381148   | <i>CTSB</i>         | REACTOME_GENE_EXPRESSION_TRANSCRIPTION                           |
| 8:23050400   | <i>BIN3</i>         | REACTOME_GENE_EXPRESSION_TRANSCRIPTION                           |
| 11:82886475  | <i>DLG2</i>         | REACTOME_GENE_EXPRESSION_TRANSCRIPTION                           |
| 12:46134812  | <i>SCAF11</i>       | REACTOME_GENE_EXPRESSION_TRANSCRIPTION                           |
| 14:55515304  | <i>GCH1</i>         | REACTOME_GENE_EXPRESSION_TRANSCRIPTION                           |
| 15:61293467  | <i>VPS13C</i>       | REACTOME_GENE_EXPRESSION_TRANSCRIPTION                           |
| 16:30438930  | <i>SETD1A</i>       | REACTOME_GENE_EXPRESSION_TRANSCRIPTION                           |
| 16:30510571  | <i>SETD1A</i>       | REACTOME_GENE_EXPRESSION_TRANSCRIPTION                           |
| 16:30516492  | <i>SETD1A</i>       | REACTOME_GENE_EXPRESSION_TRANSCRIPTION                           |
| 16:30520856  | <i>SETD1A</i>       | REACTOME_GENE_EXPRESSION_TRANSCRIPTION                           |
| 17:7578671   | <i>V1NB1</i>        | REACTOME_GENE_EXPRESSION_TRANSCRIPTION                           |
| 17:41056283  | <i>RETREG3</i>      | REACTOME_GENE_EXPRESSION_TRANSCRIPTION                           |
| 17:59922925  | <i>BRIP1</i>        | REACTOME_GENE_EXPRESSION_TRANSCRIPTION                           |
| 6:32602372   | <i>HLA-DRB5</i>     | REACTOME_GENERATION_OF_SECOND_MESSENGER_MOLECULES                |
| 1:227754686  | <i>ITPKB</i>        | REACTOME_GENERIC_TRANSCRIPTION_PATHWAY                           |
| 1:227804041  | <i>ITPKB</i>        | REACTOME_GENERIC_TRANSCRIPTION_PATHWAY                           |
| 2:135708115  | <i>TMEM163</i>      | REACTOME_GENERIC_TRANSCRIPTION_PATHWAY                           |

|              |                     |                                                                                 |
|--------------|---------------------|---------------------------------------------------------------------------------|
| 4:78175384   | <i>FAM47E-STBD1</i> | REACTOME_GENERIC_TRANSCRIPTION_PATHWAY                                          |
| 4:114424939  | <i>CAMK2D</i>       | REACTOME_GENERIC_TRANSCRIPTION_PATHWAY                                          |
| 6:28117331   | <i>LOC100131289</i> | REACTOME_GENERIC_TRANSCRIPTION_PATHWAY                                          |
| 6:28223680   | <i>LOC100131289</i> | REACTOME_GENERIC_TRANSCRIPTION_PATHWAY                                          |
| 6:31862876   | <i>HLA-DRB5</i>     | REACTOME_GENERIC_TRANSCRIPTION_PATHWAY                                          |
| 6:31925679   | <i>HLA-DRB5</i>     | REACTOME_GENERIC_TRANSCRIPTION_PATHWAY                                          |
| 6:32186193   | <i>HLA-DRB5</i>     | REACTOME_GENERIC_TRANSCRIPTION_PATHWAY                                          |
| 6:32814942   | <i>HLA-DRB5</i>     | REACTOME_GENERIC_TRANSCRIPTION_PATHWAY                                          |
| 6:32941506   | <i>HLA-DRB5</i>     | REACTOME_GENERIC_TRANSCRIPTION_PATHWAY                                          |
| 8:11381148   | <i>CTSB</i>         | REACTOME_GENERIC_TRANSCRIPTION_PATHWAY                                          |
| 8:23050400   | <i>BIN3</i>         | REACTOME_GENERIC_TRANSCRIPTION_PATHWAY                                          |
| 12:46134812  | <i>SCAF11</i>       | REACTOME_GENERIC_TRANSCRIPTION_PATHWAY                                          |
| 14:55515304  | <i>GCH1</i>         | REACTOME_GENERIC_TRANSCRIPTION_PATHWAY                                          |
| 15:61293467  | <i>VPS13C</i>       | REACTOME_GENERIC_TRANSCRIPTION_PATHWAY                                          |
| 16:30438930  | <i>SETD1A</i>       | REACTOME_GENERIC_TRANSCRIPTION_PATHWAY                                          |
| 16:30510571  | <i>SETD1A</i>       | REACTOME_GENERIC_TRANSCRIPTION_PATHWAY                                          |
| 16:30516492  | <i>SETD1A</i>       | REACTOME_GENERIC_TRANSCRIPTION_PATHWAY                                          |
| 16:30520856  | <i>SETD1A</i>       | REACTOME_GENERIC_TRANSCRIPTION_PATHWAY                                          |
| 17:7578671   | <i>V1NB1</i>        | REACTOME_GENERIC_TRANSCRIPTION_PATHWAY                                          |
| 17:41056283  | <i>RETREG3</i>      | REACTOME_GENERIC_TRANSCRIPTION_PATHWAY                                          |
| 17:5922925   | <i>BRIP1</i>        | REACTOME_GENERIC_TRANSCRIPTION_PATHWAY                                          |
| 1:231698854  | <i>SIPA1L2</i>      | REACTOME_GENE_SILENCING_BY_RNA                                                  |
| 12:133206648 | <i>FBRSL1</i>       | REACTOME_GLOBAL_GENOME_NUCLEOTIDE_EXCISION_REPAIR_GG_NER                        |
| 12:133223685 | <i>FBRSL1</i>       | REACTOME_GLOBAL_GENOME_NUCLEOTIDE_EXCISION_REPAIR_GG_NER                        |
| 12:133225045 | <i>FBRSL1</i>       | REACTOME_GLOBAL_GENOME_NUCLEOTIDE_EXCISION_REPAIR_GG_NER                        |
| 2:18143082   | <i>KCNS3</i>        | REACTOME_GLUCAGON LIKE PEPTIDE_1_GLP1_REGULATES_INSULIN_SECRETION               |
| 2:18176120   | <i>KCNS3</i>        | REACTOME_GLUCAGON LIKE PEPTIDE_1_GLP1_REGULATES_INSULIN_SECRETION               |
| 2:18247777   | <i>KCNS3</i>        | REACTOME_GLUCAGON LIKE PEPTIDE_1_GLP1_REGULATES_INSULIN_SECRETION               |
| 2:18296870   | <i>KCNS3</i>        | REACTOME_GLUCAGON LIKE PEPTIDE_1_GLP1_REGULATES_INSULIN_SECRETION               |
| 2:18335515   | <i>KCNS3</i>        | REACTOME_GLUCAGON LIKE PEPTIDE_1_GLP1_REGULATES_INSULIN_SECRETION               |
| 3:48835245   | <i>IP6K2</i>        | REACTOME_GLUCAGON LIKE PEPTIDE_1_GLP1_REGULATES_INSULIN_SECRETION               |
| 3:123057397  | <i>KPNA1</i>        | REACTOME_GLUCAGON LIKE PEPTIDE_1_GLP1_REGULATES_INSULIN_SECRETION               |
| 3:48835245   | <i>IP6K2</i>        | REACTOME_GLUCAGON_SIGNALING_IN_METABOLIC_REGULATION                             |
| 3:123057397  | <i>KPNA1</i>        | REACTOME_GLUCAGON_SIGNALING_IN_METABOLIC_REGULATION                             |
| 10:104591639 | <i>GBF1</i>         | REACTOME_GLUCOCORTICOID_BIOSYNTHESIS                                            |
| 17:41056283  | <i>RETREG3</i>      | REACTOME_GLUONEOGENESIS                                                         |
| 17:41056283  | <i>RETREG3</i>      | REACTOME_GLUCOSE_METABOLISM                                                     |
| 1:226108200  | <i>ITPKB</i>        | REACTOME_GLUTAMATE_AND_GLUTAMINE_METABOLISM                                     |
| 4:114424939  | <i>CAMK2D</i>       | REACTOME_GLUTAMATE_BINDING_ACTIVATION_OF_AMPA_RECEPTORS_AND_SYNAPTIC_PLASTICITY |
| 17:7101771   | <i>V1NB1</i>        | REACTOME_GLUTAMATE_BINDING_ACTIVATION_OF_AMPA_RECEPTORS_AND_SYNAPTIC_PLASTICITY |
| 17:44800946  | <i>WNT3</i>         | REACTOME_GLUTAMATE_BINDING_ACTIVATION_OF_AMPA_RECEPTORS_AND_SYNAPTIC_PLASTICITY |
| 17:44833217  | <i>WNT3</i>         | REACTOME_GLUTAMATE_BINDING_ACTIVATION_OF_AMPA_RECEPTORS_AND_SYNAPTIC_PLASTICITY |
| 2:96858914   | <i>KCNIP3</i>       | REACTOME_GLYCEROPHOSPHOLIPID_BIOSYNTHESIS                                       |
| 6:31846234   | <i>HLA-DRB5</i>     | REACTOME_GLYCEROPHOSPHOLIPID_BIOSYNTHESIS                                       |
| 12:123561638 | <i>HIP1R</i>        | REACTOME_GLYCEROPHOSPHOLIPID_BIOSYNTHESIS                                       |
| 12:123585705 | <i>HIP1R</i>        | REACTOME_GLYCEROPHOSPHOLIPID_BIOSYNTHESIS                                       |
| 20:6011934   | <i>CRLS1</i>        | REACTOME_GLYCEROPHOSPHOLIPID_BIOSYNTHESIS                                       |
| 17:41056283  | <i>RETREG3</i>      | REACTOME_GLYCOGEN_STORAGE_DISEASES                                              |
| 6:71594785   | <i>RIMS1</i>        | REACTOME_GLYCOSAMINOGLYCAN_METABOLISM                                           |
| 7:65425894   | <i>GS1-124K5.11</i> | REACTOME_GLYCOSAMINOGLYCAN_METABOLISM                                           |
| 3:160817877  | <i>SPTSSB</i>       | REACTOME_GLYCOSPHINGOLIPID_METABOLISM                                           |
| 14:88393900  | <i>GALC</i>         | REACTOME_GLYCOSPHINGOLIPID_METABOLISM                                           |
| 14:88443553  | <i>GALC</i>         | REACTOME_GLYCOSPHINGOLIPID_METABOLISM                                           |

|              |                     |                                                              |
|--------------|---------------------|--------------------------------------------------------------|
| 12:133295501 | <i>FBRSL1</i>       | REACTOME_GLYOXYLATE_METABOLISM_AND_GLYCINE_DEGRADATION       |
| 3:121411876  | <i>KPNA1</i>        | REACTOME_GOLGI_ASSOCIATED_VESICLE_BIOGENESIS                 |
| 3:121412702  | <i>KPNA1</i>        | REACTOME_GOLGI_ASSOCIATED_VESICLE_BIOGENESIS                 |
| 4:925376     | <i>GAK</i>          | REACTOME_GOLGI_ASSOCIATED_VESICLE_BIOGENESIS                 |
| 9:17579690   | <i>SH3GL2_2</i>     | REACTOME_GOLGI_ASSOCIATED_VESICLE_BIOGENESIS                 |
| 9:17609302   | <i>SH3GL2_2</i>     | REACTOME_GOLGI_ASSOCIATED_VESICLE_BIOGENESIS                 |
| 9:17627444   | <i>SH3GL2_2</i>     | REACTOME_GOLGI_ASSOCIATED_VESICLE_BIOGENESIS                 |
| 9:17710876   | <i>SH3GL2_2</i>     | REACTOME_GOLGI_ASSOCIATED_VESICLE_BIOGENESIS                 |
| 9:17732590   | <i>SH3GL2_2</i>     | REACTOME_GOLGI_ASSOCIATED_VESICLE_BIOGENESIS                 |
| 9:17737514   | <i>SH3GL2_2</i>     | REACTOME_GOLGI_ASSOCIATED_VESICLE_BIOGENESIS                 |
| 9:17758945   | <i>SH3GL2_2</i>     | REACTOME_GOLGI_ASSOCIATED_VESICLE_BIOGENESIS                 |
| 12:123326598 | <i>HIP1R</i>        | REACTOME_GOLGI_ASSOCIATED_VESICLE_BIOGENESIS                 |
| 4:76695927   | <i>FAM47E-STBD1</i> | REACTOME_GOLGI_CISTERNAE_PERICENTRIOLAR_STACK_REORGANIZATION |
| 2:135921205  | <i>TMEM163</i>      | REACTOME_GOLGI_TO_ER_RETROGRADE_TRANSPORT                    |
| 10:104005410 | <i>GBF1</i>         | REACTOME_GOLGI_TO_ER_RETROGRADE_TRANSPORT                    |
| 10:104034550 | <i>GBF1</i>         | REACTOME_GOLGI_TO_ER_RETROGRADE_TRANSPORT                    |
| 10:104258303 | <i>GBF1</i>         | REACTOME_GOLGI_TO_ER_RETROGRADE_TRANSPORT                    |
| 12:39759090  | <i>LRRK2_2</i>      | REACTOME_GOLGI_TO_ER_RETROGRADE_TRANSPORT                    |
| 17:43021962  | <i>CRHR1_2</i>      | REACTOME_GOLGI_TO_ER_RETROGRADE_TRANSPORT                    |
| 17:44800946  | <i>WNT3</i>         | REACTOME_GOLGI_TO_ER_RETROGRADE_TRANSPORT                    |
| 17:44833217  | <i>WNT3</i>         | REACTOME_GOLGI_TO_ER_RETROGRADE_TRANSPORT                    |
| 3:151090424  | <i>MED12L</i>       | REACTOME_GPCR_LIGAND_BINDING                                 |
| 3:151099733  | <i>MED12L</i>       | REACTOME_GPCR_LIGAND_BINDING                                 |
| 3:151599393  | <i>MED12L</i>       | REACTOME_GPCR_LIGAND_BINDING                                 |
| 6:29579544   | <i>TRIM40</i>       | REACTOME_GPCR_LIGAND_BINDING                                 |
| 14:88472612  | <i>GALC</i>         | REACTOME_GPCR_LIGAND_BINDING                                 |
| 17:43744203  | <i>CRHR1_2</i>      | REACTOME_GPCR_LIGAND_BINDING                                 |
| 17:43748712  | <i>CRHR1_2</i>      | REACTOME_GPCR_LIGAND_BINDING                                 |
| 17:43767804  | <i>CRHR1_2</i>      | REACTOME_GPCR_LIGAND_BINDING                                 |
| 17:43784228  | <i>CRHR1_2</i>      | REACTOME_GPCR_LIGAND_BINDING                                 |
| 17:43791502  | <i>CRHR1_2</i>      | REACTOME_GPCR_LIGAND_BINDING                                 |
| 17:43843861  | <i>CRHR1_2</i>      | REACTOME_GPCR_LIGAND_BINDING                                 |
| 17:43847503  | <i>CRHR1_2</i>      | REACTOME_GPCR_LIGAND_BINDING                                 |
| 17:44843651  | <i>WNT3</i>         | REACTOME_GPCR_LIGAND_BINDING                                 |
| 17:44888209  | <i>WNT3</i>         | REACTOME_GPCR_LIGAND_BINDING                                 |
| 17:44888715  | <i>WNT3</i>         | REACTOME_GPCR_LIGAND_BINDING                                 |
| 17:44906949  | <i>WNT3</i>         | REACTOME_GPCR_LIGAND_BINDING                                 |
| 17:44912901  | <i>WNT3</i>         | REACTOME_GPCR_LIGAND_BINDING                                 |
| 17:44931399  | <i>WNT3</i>         | REACTOME_GPCR_LIGAND_BINDING                                 |
| 17:44947756  | <i>WNT3</i>         | REACTOME_GPCR_LIGAND_BINDING                                 |
| 3:49406095   | <i>IP6K2</i>        | REACTOME_G_PROTEIN_BETA:GAMMA_SIGNALLING                     |
| 3:49424231   | <i>IP6K2</i>        | REACTOME_G_PROTEIN_BETA:GAMMA_SIGNALLING                     |
| 3:49450137   | <i>IP6K2</i>        | REACTOME_G_PROTEIN_BETA:GAMMA_SIGNALLING                     |
| 6:29579544   | <i>TRIM40</i>       | REACTOME_G_PROTEIN_GATED_POTASSIUM_CHANNELS                  |
| 21:39197323  | <i>DYRK1A</i>       | REACTOME_G_PROTEIN_GATED_POTASSIUM_CHANNELS                  |
| 3:48835245   | <i>IP6K2</i>        | REACTOME_G_PROTEIN_MEDIATED_EVENTS                           |
| 3:123057397  | <i>KPNA1</i>        | REACTOME_G_PROTEIN_MEDIATED_EVENTS                           |
| 4:114424939  | <i>CAMK2D</i>       | REACTOME_G_PROTEIN_MEDIATED_EVENTS                           |
| 3:49406095   | <i>IP6K2</i>        | REACTOME_GPVI_MEDIATED_ACTIVATION_CASCADE                    |
| 3:49424231   | <i>IP6K2</i>        | REACTOME_GPVI_MEDIATED_ACTIVATION_CASCADE                    |
| 3:49450137   | <i>IP6K2</i>        | REACTOME_GPVI_MEDIATED_ACTIVATION_CASCADE                    |
| 6:112009427  | <i>FYN</i>          | REACTOME_GPVI_MEDIATED_ACTIVATION_CASCADE                    |
| 6:112056759  | <i>FYN</i>          | REACTOME_GPVI_MEDIATED_ACTIVATION_CASCADE                    |

|              |                     |                                                    |
|--------------|---------------------|----------------------------------------------------|
| 6:112151452  | <i>FYN</i>          | REACTOME_GPII_MEDIATED_ACTIVATION_CASCADE          |
| 17:40392358  | <i>RETREG3</i>      | REACTOME_GROWTH_HORMONE_RECEPTOR_SIGNALING         |
| 3:183427301  | <i>MCCC1</i>        | REACTOME_HATS_ACETYLATE_HISTONES                   |
| 17:7155861   | <i>V1NB1</i>        | REACTOME_HATS_ACETYLATE_HISTONES                   |
| 17:44160410  | <i>WNT3</i>         | REACTOME_HATS_ACETYLATE_HISTONES                   |
| 17:44189067  | <i>WNT3</i>         | REACTOME_HATS_ACETYLATE_HISTONES                   |
| 12:133206648 | <i>FBRSL1</i>       | REACTOME_HDR_THROUGH_HOMOLOGOUS_RECOMBINATION_HRR  |
| 12:133223685 | <i>FBRSL1</i>       | REACTOME_HDR_THROUGH_HOMOLOGOUS_RECOMBINATION_HRR  |
| 12:133225045 | <i>FBRSL1</i>       | REACTOME_HDR_THROUGH_HOMOLOGOUS_RECOMBINATION_HRR  |
| 17:59922925  | <i>BRIP1</i>        | REACTOME_HDR_THROUGH_HOMOLOGOUS_RECOMBINATION_HRR  |
| 17:59922925  | <i>BRIP1</i>        | REACTOME_HDR_THROUGH_SINGLE_STRAND_ANNEALING_SSA   |
| 6:32814942   | <i>HLA-DRB5</i>     | REACTOME_HEDGEHOG_LIGAND_BIOGENESIS                |
| 3:48835245   | <i>IP6K2</i>        | REACTOME_HEDGEHOG_OFF_STATE                        |
| 3:123057397  | <i>KPNA1</i>        | REACTOME_HEDGEHOG_OFF_STATE                        |
| 6:32814942   | <i>HLA-DRB5</i>     | REACTOME_HEDGEHOG_OFF_STATE                        |
| 10:103185542 | <i>GBF1</i>         | REACTOME_HEDGEHOG_OFF_STATE                        |
| 10:103308244 | <i>GBF1</i>         | REACTOME_HEDGEHOG_OFF_STATE                        |
| 10:104285824 | <i>GBF1</i>         | REACTOME_HEDGEHOG_OFF_STATE                        |
| 6:32814942   | <i>HLA-DRB5</i>     | REACTOME_HEDGEHOG_ON_STATE                         |
| 10:104285824 | <i>GBF1</i>         | REACTOME_HEDGEHOG_ON_STATE                         |
| 3:48835245   | <i>IP6K2</i>        | REACTOME_HEMOSTASIS                                |
| 3:49406095   | <i>IP6K2</i>        | REACTOME_HEMOSTASIS                                |
| 3:49424231   | <i>IP6K2</i>        | REACTOME_HEMOSTASIS                                |
| 3:49450137   | <i>IP6K2</i>        | REACTOME_HEMOSTASIS                                |
| 3:151090424  | <i>MED12L</i>       | REACTOME_HEMOSTASIS                                |
| 3:151099733  | <i>MED12L</i>       | REACTOME_HEMOSTASIS                                |
| 4:90804532   | <i>SNCA_2</i>       | REACTOME_HEMOSTASIS                                |
| 4:90868355   | <i>SNCA_2</i>       | REACTOME_HEMOSTASIS                                |
| 6:112009427  | <i>FYN</i>          | REACTOME_HEMOSTASIS                                |
| 6:112056759  | <i>FYN</i>          | REACTOME_HEMOSTASIS                                |
| 6:112151452  | <i>FYN</i>          | REACTOME_HEMOSTASIS                                |
| 8:23050400   | <i>BIN3</i>         | REACTOME_HEMOSTASIS                                |
| 8:130914130  | <i>FAM49B</i>       | REACTOME_HEMOSTASIS                                |
| 11:10647977  | <i>RNF141</i>       | REACTOME_HEMOSTASIS                                |
| 11:10648481  | <i>RNF141</i>       | REACTOME_HEMOSTASIS                                |
| 11:10660840  | <i>RNF141</i>       | REACTOME_HEMOSTASIS                                |
| 11:82582134  | <i>DLG2</i>         | REACTOME_HEMOSTASIS                                |
| 11:82648357  | <i>DLG2</i>         | REACTOME_HEMOSTASIS                                |
| 11:133947732 | <i>IGSF9B</i>       | REACTOME_HEMOSTASIS                                |
| 12:39759090  | <i>LRRK2_2</i>      | REACTOME_HEMOSTASIS                                |
| 16:30510571  | <i>SETD1A</i>       | REACTOME_HEMOSTASIS                                |
| 16:30516492  | <i>SETD1A</i>       | REACTOME_HEMOSTASIS                                |
| 16:30520856  | <i>SETD1A</i>       | REACTOME_HEMOSTASIS                                |
| 16:31370452  | <i>SETD1A</i>       | REACTOME_HEMOSTASIS                                |
| 17:7560294   | <i>V1NB1</i>        | REACTOME_HEMOSTASIS                                |
| 17:7578671   | <i>V1NB1</i>        | REACTOME_HEMOSTASIS                                |
| 17:43021962  | <i>CRHR1_2</i>      | REACTOME_HEMOSTASIS                                |
| 19:3156505   | <i>SPPL2B</i>       | REACTOME_HEMOSTASIS                                |
| 6:71594785   | <i>RIMS1</i>        | REACTOME_HEPARAN_SULFATE_HEPARIN_HS_GAG_METABOLISM |
| 7:65425894   | <i>GS1-124K5.11</i> | REACTOME_HEPARAN_SULFATE_HEPARIN_HS_GAG_METABOLISM |
| 2:135708115  | <i>TMEM163</i>      | REACTOME_HIV_ELONGATION_ARREST_AND_RECOVERY        |
| 6:31925679   | <i>HLA-DRB5</i>     | REACTOME_HIV_ELONGATION_ARREST_AND_RECOVERY        |
| 2:135708115  | <i>TMEM163</i>      | REACTOME_HIV_INFECTION                             |

|              |                     |                                                                                   |
|--------------|---------------------|-----------------------------------------------------------------------------------|
| 6:31925679   | <i>HLA-DRB5</i>     | REACTOME_HIV_INFECTION                                                            |
| 6:32814942   | <i>HLA-DRB5</i>     | REACTOME_HIV_INFECTION                                                            |
| 6:112009427  | <i>FYN</i>          | REACTOME_HIV_INFECTION                                                            |
| 6:112056759  | <i>FYN</i>          | REACTOME_HIV_INFECTION                                                            |
| 6:112151452  | <i>FYN</i>          | REACTOME_HIV_INFECTION                                                            |
| 8:17125768   | <i>FGF20</i>        | REACTOME_HIV_INFECTION                                                            |
| 10:15199347  | <i>ITGA8</i>        | REACTOME_HIV_INFECTION                                                            |
| 10:103185542 | <i>GBF1</i>         | REACTOME_HIV_INFECTION                                                            |
| 10:103308244 | <i>GBF1</i>         | REACTOME_HIV_INFECTION                                                            |
| 17:43132290  | <i>CRHR1_2</i>      | REACTOME_HIV_INFECTION                                                            |
| 2:135708115  | <i>TMEM163</i>      | REACTOME_HIV_LIFE_CYCLE                                                           |
| 6:31925679   | <i>HLA-DRB5</i>     | REACTOME_HIV_LIFE_CYCLE                                                           |
| 8:17125768   | <i>FGF20</i>        | REACTOME_HIV_LIFE_CYCLE                                                           |
| 10:15199347  | <i>ITGA8</i>        | REACTOME_HIV_LIFE_CYCLE                                                           |
| 17:43132290  | <i>CRHR1_2</i>      | REACTOME_HIV_LIFE_CYCLE                                                           |
| 17:59922925  | <i>BRIP1</i>        | REACTOME_HOMOLOGOUS_DNA_PAIRING_AND_STRAND_EXCHANGE                               |
| 12:133206648 | <i>FBRSL1</i>       | REACTOME_HOMOLOGY_DIRECTED_REPAIR                                                 |
| 12:133223685 | <i>FBRSL1</i>       | REACTOME_HOMOLOGY_DIRECTED_REPAIR                                                 |
| 12:133225045 | <i>FBRSL1</i>       | REACTOME_HOMOLOGY_DIRECTED_REPAIR                                                 |
| 17:59922925  | <i>BRIP1</i>        | REACTOME_HOMOLOGY_DIRECTED_REPAIR                                                 |
| 6:32814942   | <i>HLA-DRB5</i>     | REACTOME_HOST_INTERACTIONS_OF_HIV_FACTORS                                         |
| 6:112009427  | <i>FYN</i>          | REACTOME_HOST_INTERACTIONS_OF_HIV_FACTORS                                         |
| 6:112056759  | <i>FYN</i>          | REACTOME_HOST_INTERACTIONS_OF_HIV_FACTORS                                         |
| 6:112151452  | <i>FYN</i>          | REACTOME_HOST_INTERACTIONS_OF_HIV_FACTORS                                         |
| 10:103185542 | <i>GBF1</i>         | REACTOME_HOST_INTERACTIONS_OF_HIV_FACTORS                                         |
| 10:103308244 | <i>GBF1</i>         | REACTOME_HOST_INTERACTIONS_OF_HIV_FACTORS                                         |
| 4:114424939  | <i>CAMK2D</i>       | REACTOME_HSF1_DEPENDENT_TRANSACTIVATION                                           |
| 7:65425894   | <i>GS1-124K5.11</i> | REACTOME_HS_GAG_DEGRADATION                                                       |
| 10:104258303 | <i>GBF1</i>         | REACTOME_HSP90_CHAPERONE_CYCLE_FOR_STEROID_HORMONE_RECEPTORS_SHR                  |
| 7:65425894   | <i>GS1-124K5.11</i> | REACTOME_HYALURONAN_METABOLISM                                                    |
| 7:65425894   | <i>GS1-124K5.11</i> | REACTOME_HYALURONAN_UPTAKE_AND_DEGRADATION                                        |
| 6:29798642   | <i>TRIM40</i>       | REACTOME_IMMUNOREGULATORY_INTERACTIONS_BETWEEN_A_LYMPHOID_AND_A_NON_LYMPHOID_CELL |
| 16:30510571  | <i>SETD1A</i>       | REACTOME_IMMUNOREGULATORY_INTERACTIONS_BETWEEN_A_LYMPHOID_AND_A_NON_LYMPHOID_CELL |
| 16:30516492  | <i>SETD1A</i>       | REACTOME_IMMUNOREGULATORY_INTERACTIONS_BETWEEN_A_LYMPHOID_AND_A_NON_LYMPHOID_CELL |
| 16:30520856  | <i>SETD1A</i>       | REACTOME_IMMUNOREGULATORY_INTERACTIONS_BETWEEN_A_LYMPHOID_AND_A_NON_LYMPHOID_CELL |
| 2:135708115  | <i>TMEM163</i>      | REACTOME_INFECTIOUS_DISEASE                                                       |
| 6:31925679   | <i>HLA-DRB5</i>     | REACTOME_INFECTIOUS_DISEASE                                                       |
| 6:32814942   | <i>HLA-DRB5</i>     | REACTOME_INFECTIOUS_DISEASE                                                       |
| 6:112009427  | <i>FYN</i>          | REACTOME_INFECTIOUS_DISEASE                                                       |
| 6:112056759  | <i>FYN</i>          | REACTOME_INFECTIOUS_DISEASE                                                       |
| 6:112151452  | <i>FYN</i>          | REACTOME_INFECTIOUS_DISEASE                                                       |
| 8:17125768   | <i>FGF20</i>        | REACTOME_INFECTIOUS_DISEASE                                                       |
| 9:17579690   | <i>SH3GL2_2</i>     | REACTOME_INFECTIOUS_DISEASE                                                       |
| 9:17609302   | <i>SH3GL2_2</i>     | REACTOME_INFECTIOUS_DISEASE                                                       |
| 9:17627444   | <i>SH3GL2_2</i>     | REACTOME_INFECTIOUS_DISEASE                                                       |
| 9:17710876   | <i>SH3GL2_2</i>     | REACTOME_INFECTIOUS_DISEASE                                                       |
| 9:17732590   | <i>SH3GL2_2</i>     | REACTOME_INFECTIOUS_DISEASE                                                       |
| 9:17737514   | <i>SH3GL2_2</i>     | REACTOME_INFECTIOUS_DISEASE                                                       |
| 9:17758945   | <i>SH3GL2_2</i>     | REACTOME_INFECTIOUS_DISEASE                                                       |
| 10:15199347  | <i>ITGA8</i>        | REACTOME_INFECTIOUS_DISEASE                                                       |
| 10:103185542 | <i>GBF1</i>         | REACTOME_INFECTIOUS_DISEASE                                                       |
| 10:103308244 | <i>GBF1</i>         | REACTOME_INFECTIOUS_DISEASE                                                       |
| 16:31004169  | <i>SETD1A</i>       | REACTOME_INFECTIOUS_DISEASE                                                       |

|              |                     |                                                                                                     |
|--------------|---------------------|-----------------------------------------------------------------------------------------------------|
| 17:43132290  | <i>CRHR1_2</i>      | REACTOME_INFECTIOUS_DISEASE                                                                         |
| 17:45215865  | <i>WNT3</i>         | ION_OF_THE_PROTEOLYTIC_ACTIVITY_OF_APC_C_REQUIRED_FOR_THE_ONSET_OF_ANAPHASE_BY_MITOTIC_SPINDLE_CHEC |
| 17:45244822  | <i>WNT3</i>         | ION_OF_THE_PROTEOLYTIC_ACTIVITY_OF_APC_C_REQUIRED_FOR_THE_ONSET_OF_ANAPHASE_BY_MITOTIC_SPINDLE_CHEC |
| 6:31897219   | <i>HLA-DRB5</i>     | REACTOME_INITIAL_TRIGGERING_OF_COMPLEMENT                                                           |
| 9:17579690   | <i>SH3GL2_2</i>     | REACTOME_INLB_MEDIATED_ENTRY_OF_LISTERIA_MONOCYTOGENES_INTO_HOST_CELL                               |
| 9:17609302   | <i>SH3GL2_2</i>     | REACTOME_INLB_MEDIATED_ENTRY_OF_LISTERIA_MONOCYTOGENES_INTO_HOST_CELL                               |
| 9:17627444   | <i>SH3GL2_2</i>     | REACTOME_INLB_MEDIATED_ENTRY_OF_LISTERIA_MONOCYTOGENES_INTO_HOST_CELL                               |
| 9:17710876   | <i>SH3GL2_2</i>     | REACTOME_INLB_MEDIATED_ENTRY_OF_LISTERIA_MONOCYTOGENES_INTO_HOST_CELL                               |
| 9:17732590   | <i>SH3GL2_2</i>     | REACTOME_INLB_MEDIATED_ENTRY_OF_LISTERIA_MONOCYTOGENES_INTO_HOST_CELL                               |
| 9:17737514   | <i>SH3GL2_2</i>     | REACTOME_INLB_MEDIATED_ENTRY_OF_LISTERIA_MONOCYTOGENES_INTO_HOST_CELL                               |
| 9:17758945   | <i>SH3GL2_2</i>     | REACTOME_INLB_MEDIATED_ENTRY_OF_LISTERIA_MONOCYTOGENES_INTO_HOST_CELL                               |
| 1:171945488  | <i>VAMP4</i>        | REACTOME_INNATE_IMMUNE_SYSTEM                                                                       |
| 1:172137119  | <i>VAMP4</i>        | REACTOME_INNATE_IMMUNE_SYSTEM                                                                       |
| 1:172386261  | <i>VAMP4</i>        | REACTOME_INNATE_IMMUNE_SYSTEM                                                                       |
| 1:226052830  | <i>ITPKB</i>        | REACTOME_INNATE_IMMUNE_SYSTEM                                                                       |
| 3:49406095   | <i>IP6K2</i>        | REACTOME_INNATE_IMMUNE_SYSTEM                                                                       |
| 3:49424231   | <i>IP6K2</i>        | REACTOME_INNATE_IMMUNE_SYSTEM                                                                       |
| 3:49450137   | <i>IP6K2</i>        | REACTOME_INNATE_IMMUNE_SYSTEM                                                                       |
| 4:15709252   | <i>BST1</i>         | REACTOME_INNATE_IMMUNE_SYSTEM                                                                       |
| 4:15713608   | <i>BST1</i>         | REACTOME_INNATE_IMMUNE_SYSTEM                                                                       |
| 4:15724372   | <i>BST1</i>         | REACTOME_INNATE_IMMUNE_SYSTEM                                                                       |
| 4:15737882   | <i>BST1</i>         | REACTOME_INNATE_IMMUNE_SYSTEM                                                                       |
| 6:31873292   | <i>HLA-DRB5</i>     | REACTOME_INNATE_IMMUNE_SYSTEM                                                                       |
| 6:31879377   | <i>HLA-DRB5</i>     | REACTOME_INNATE_IMMUNE_SYSTEM                                                                       |
| 6:31895092   | <i>HLA-DRB5</i>     | REACTOME_INNATE_IMMUNE_SYSTEM                                                                       |
| 6:31897219   | <i>HLA-DRB5</i>     | REACTOME_INNATE_IMMUNE_SYSTEM                                                                       |
| 6:32151443   | <i>HLA-DRB5</i>     | REACTOME_INNATE_IMMUNE_SYSTEM                                                                       |
| 6:32814942   | <i>HLA-DRB5</i>     | REACTOME_INNATE_IMMUNE_SYSTEM                                                                       |
| 6:112009427  | <i>FYN</i>          | REACTOME_INNATE_IMMUNE_SYSTEM                                                                       |
| 6:112056759  | <i>FYN</i>          | REACTOME_INNATE_IMMUNE_SYSTEM                                                                       |
| 6:112151452  | <i>FYN</i>          | REACTOME_INNATE_IMMUNE_SYSTEM                                                                       |
| 6:133025715  | <i>RPS12</i>        | REACTOME_INNATE_IMMUNE_SYSTEM                                                                       |
| 6:133028870  | <i>RPS12</i>        | REACTOME_INNATE_IMMUNE_SYSTEM                                                                       |
| 6:133034076  | <i>RPS12</i>        | REACTOME_INNATE_IMMUNE_SYSTEM                                                                       |
| 7:65425894   | <i>GS1-124K5.11</i> | REACTOME_INNATE_IMMUNE_SYSTEM                                                                       |
| 8:11712443   | <i>CTSB</i>         | REACTOME_INNATE_IMMUNE_SYSTEM                                                                       |
| 9:33791164   | <i>UBAP2</i>        | REACTOME_INNATE_IMMUNE_SYSTEM                                                                       |
| 10:103185542 | <i>GBF1</i>         | REACTOME_INNATE_IMMUNE_SYSTEM                                                                       |
| 10:103308244 | <i>GBF1</i>         | REACTOME_INNATE_IMMUNE_SYSTEM                                                                       |
| 11:10392432  | <i>RNF141</i>       | REACTOME_INNATE_IMMUNE_SYSTEM                                                                       |
| 11:10487997  | <i>RNF141</i>       | REACTOME_INNATE_IMMUNE_SYSTEM                                                                       |
| 11:82582134  | <i>DLG2</i>         | REACTOME_INNATE_IMMUNE_SYSTEM                                                                       |
| 11:82648357  | <i>DLG2</i>         | REACTOME_INNATE_IMMUNE_SYSTEM                                                                       |
| 12:45755099  | <i>SCAF11</i>       | REACTOME_INNATE_IMMUNE_SYSTEM                                                                       |
| 12:124219791 | <i>HIP1R</i>        | REACTOME_INNATE_IMMUNE_SYSTEM                                                                       |
| 16:30510571  | <i>SETD1A</i>       | REACTOME_INNATE_IMMUNE_SYSTEM                                                                       |
| 16:30516492  | <i>SETD1A</i>       | REACTOME_INNATE_IMMUNE_SYSTEM                                                                       |
| 16:30520856  | <i>SETD1A</i>       | REACTOME_INNATE_IMMUNE_SYSTEM                                                                       |
| 16:31370452  | <i>SETD1A</i>       | REACTOME_INNATE_IMMUNE_SYSTEM                                                                       |
| 16:50730088  | <i>CASC16</i>       | REACTOME_INNATE_IMMUNE_SYSTEM                                                                       |
| 16:50730446  | <i>CASC16</i>       | REACTOME_INNATE_IMMUNE_SYSTEM                                                                       |
| 16:50745926  | <i>CASC16</i>       | REACTOME_INNATE_IMMUNE_SYSTEM                                                                       |
| 17:39883520  | <i>RETREG3</i>      | REACTOME_INNATE_IMMUNE_SYSTEM                                                                       |

|              |                 |                                                                                      |
|--------------|-----------------|--------------------------------------------------------------------------------------|
| 17:42423844  | <i>FAM171A2</i> | REACTOME_INNATE_IMMUNE_SYSTEM                                                        |
| 17:43390763  | <i>CRHR1_2</i>  | REACTOME_INNATE_IMMUNE_SYSTEM                                                        |
| 1:226910340  | <i>ITPKB</i>    | REACTOME_INOSITOL_PHOSPHATE_METABOLISM                                               |
| 1:226916078  | <i>ITPKB</i>    | REACTOME_INOSITOL_PHOSPHATE_METABOLISM                                               |
| 3:48748989   | <i>IP6K2</i>    | REACTOME_INOSITOL_PHOSPHATE_METABOLISM                                               |
| 3:48766111   | <i>IP6K2</i>    | REACTOME_INOSITOL_PHOSPHATE_METABOLISM                                               |
| 17:43195981  | <i>CRHR1_2</i>  | REACTOME_INOSITOL_PHOSPHATE_METABOLISM                                               |
| 3:150298317  | <i>MED12L</i>   | REACTOME_INSERTION_OF_TAIL_ANCHORED_PROTEINS_INTO_THE_ENDOPLASMIC_RETICULUM_MEMBRANE |
| 6:31607942   | <i>HLA-DRB5</i> | REACTOME_INSERTION_OF_TAIL_ANCHORED_PROTEINS_INTO_THE_ENDOPLASMIC_RETICULUM_MEMBRANE |
| 12:124219791 | <i>HIP1R</i>    | REACTOME_INSULIN_RECEPTOR_RECYCLING                                                  |
| 2:18143082   | <i>KCNS3</i>    | REACTOME_INTEGRATION_OF_ENERGY_METABOLISM                                            |
| 2:18176120   | <i>KCNS3</i>    | REACTOME_INTEGRATION_OF_ENERGY_METABOLISM                                            |
| 2:18247777   | <i>KCNS3</i>    | REACTOME_INTEGRATION_OF_ENERGY_METABOLISM                                            |
| 2:18296870   | <i>KCNS3</i>    | REACTOME_INTEGRATION_OF_ENERGY_METABOLISM                                            |
| 2:18335515   | <i>KCNS3</i>    | REACTOME_INTEGRATION_OF_ENERGY_METABOLISM                                            |
| 3:48835245   | <i>IP6K2</i>    | REACTOME_INTEGRATION_OF_ENERGY_METABOLISM                                            |
| 3:123057397  | <i>KPNA1</i>    | REACTOME_INTEGRATION_OF_ENERGY_METABOLISM                                            |
| 19:3156505   | <i>SPPL2B</i>   | REACTOME_INTEGRATION_OF_ENERGY_METABOLISM                                            |
| 10:15569598  | <i>ITGA8</i>    | REACTOME_INTEGRIN_CELL_SURFACE_INTERACTIONS                                          |
| 10:15652368  | <i>ITGA8</i>    | REACTOME_INTEGRIN_CELL_SURFACE_INTERACTIONS                                          |
| 11:133947732 | <i>IGSF9B</i>   | REACTOME_INTEGRIN_CELL_SURFACE_INTERACTIONS                                          |
| 16:30510571  | <i>SETD1A</i>   | REACTOME_INTEGRIN_CELL_SURFACE_INTERACTIONS                                          |
| 16:30516492  | <i>SETD1A</i>   | REACTOME_INTEGRIN_CELL_SURFACE_INTERACTIONS                                          |
| 16:30520856  | <i>SETD1A</i>   | REACTOME_INTEGRIN_CELL_SURFACE_INTERACTIONS                                          |
| 16:31370452  | <i>SETD1A</i>   | REACTOME_INTEGRIN_CELL_SURFACE_INTERACTIONS                                          |
| 4:113938109  | <i>CAMK2D</i>   | REACTOME_INTERACTION_BETWEEN_L1_AND_ANKYRINS                                         |
| 4:114077386  | <i>CAMK2D</i>   | REACTOME_INTERACTION_BETWEEN_L1_AND_ANKYRINS                                         |
| 4:114217997  | <i>CAMK2D</i>   | REACTOME_INTERACTION_BETWEEN_L1_AND_ANKYRINS                                         |
| 16:30438930  | <i>SETD1A</i>   | REACTOME_INTERCONVERSION_OF_NUCLEOTIDE_DI_AND_TRIPHOSPHATES                          |
| 3:48748989   | <i>IP6K2</i>    | REACTOME_INTERFERON_ALPHA_BETA_SIGNALING                                             |
| 3:48766111   | <i>IP6K2</i>    | REACTOME_INTERFERON_ALPHA_BETA_SIGNALING                                             |
| 6:29798642   | <i>TRIM40</i>   | REACTOME_INTERFERON_ALPHA_BETA_SIGNALING                                             |
| 4:114424939  | <i>CAMK2D</i>   | REACTOME_INTERFERON_GAMMA_SIGNALING                                                  |
| 6:29798642   | <i>TRIM40</i>   | REACTOME_INTERFERON_GAMMA_SIGNALING                                                  |
| 6:30075864   | <i>TRIM40</i>   | REACTOME_INTERFERON_GAMMA_SIGNALING                                                  |
| 6:32602372   | <i>HLA-DRB5</i> | REACTOME_INTERFERON_GAMMA_SIGNALING                                                  |
| 3:48748989   | <i>IP6K2</i>    | REACTOME_INTERFERON_SIGNALING                                                        |
| 3:48766111   | <i>IP6K2</i>    | REACTOME_INTERFERON_SIGNALING                                                        |
| 4:114424939  | <i>CAMK2D</i>   | REACTOME_INTERFERON_SIGNALING                                                        |
| 6:29798642   | <i>TRIM40</i>   | REACTOME_INTERFERON_SIGNALING                                                        |
| 6:30075864   | <i>TRIM40</i>   | REACTOME_INTERFERON_SIGNALING                                                        |
| 6:32602372   | <i>HLA-DRB5</i> | REACTOME_INTERFERON_SIGNALING                                                        |
| 17:7479140   | <i>V1NB1</i>    | REACTOME_INTERFERON_SIGNALING                                                        |
| 17:7480325   | <i>V1NB1</i>    | REACTOME_INTERFERON_SIGNALING                                                        |
| 2:102609356  | <i>MAP4K4</i>   | REACTOME_INTERLEUKIN_10_SIGNALING                                                    |
| 2:102636759  | <i>MAP4K4</i>   | REACTOME_INTERLEUKIN_10_SIGNALING                                                    |
| 17:40392358  | <i>RETREG3</i>  | REACTOME_INTERLEUKIN_15_SIGNALING                                                    |
| 10:103185542 | <i>GBF1</i>     | REACTOME_INTERLEUKIN_17_SIGNALING                                                    |
| 10:103308244 | <i>GBF1</i>     | REACTOME_INTERLEUKIN_17_SIGNALING                                                    |
| 16:50730088  | <i>CASC16</i>   | REACTOME_INTERLEUKIN_17_SIGNALING                                                    |
| 16:50730446  | <i>CASC16</i>   | REACTOME_INTERLEUKIN_17_SIGNALING                                                    |
| 16:50745926  | <i>CASC16</i>   | REACTOME_INTERLEUKIN_17_SIGNALING                                                    |
| 2:103063855  | <i>MAP4K4</i>   | REACTOME_INTERLEUKIN_18_SIGNALING                                                    |

|              |          |                                                           |
|--------------|----------|-----------------------------------------------------------|
| 2:102609356  | MAP4K4   | REACTOME_INTERLEUKIN_1_FAMILY_SIGNALING                   |
| 2:102636759  | MAP4K4   | REACTOME_INTERLEUKIN_1_FAMILY_SIGNALING                   |
| 2:103063855  | MAP4K4   | REACTOME_INTERLEUKIN_1_FAMILY_SIGNALING                   |
| 6:32151443   | HLA-DRB5 | REACTOME_INTERLEUKIN_1_FAMILY_SIGNALING                   |
| 6:32814942   | HLA-DRB5 | REACTOME_INTERLEUKIN_1_FAMILY_SIGNALING                   |
| 10:103185542 | GBF1     | REACTOME_INTERLEUKIN_1_FAMILY_SIGNALING                   |
| 10:103308244 | GBF1     | REACTOME_INTERLEUKIN_1_FAMILY_SIGNALING                   |
| 16:50730088  | CASC16   | REACTOME_INTERLEUKIN_1_FAMILY_SIGNALING                   |
| 16:50730446  | CASC16   | REACTOME_INTERLEUKIN_1_FAMILY_SIGNALING                   |
| 16:50745926  | CASC16   | REACTOME_INTERLEUKIN_1_FAMILY_SIGNALING                   |
| 2:102609356  | MAP4K4   | REACTOME_INTERLEUKIN_1_SIGNALING                          |
| 2:102636759  | MAP4K4   | REACTOME_INTERLEUKIN_1_SIGNALING                          |
| 6:32151443   | HLA-DRB5 | REACTOME_INTERLEUKIN_1_SIGNALING                          |
| 6:32814942   | HLA-DRB5 | REACTOME_INTERLEUKIN_1_SIGNALING                          |
| 10:103185542 | GBF1     | REACTOME_INTERLEUKIN_1_SIGNALING                          |
| 10:103308244 | GBF1     | REACTOME_INTERLEUKIN_1_SIGNALING                          |
| 16:50730088  | CASC16   | REACTOME_INTERLEUKIN_1_SIGNALING                          |
| 16:50730446  | CASC16   | REACTOME_INTERLEUKIN_1_SIGNALING                          |
| 16:50745926  | CASC16   | REACTOME_INTERLEUKIN_1_SIGNALING                          |
| 17:40392358  | RETREG3  | REACTOME_INTERLEUKIN_20_FAMILY_SIGNALING                  |
| 17:40392358  | RETREG3  | REACTOME_INTERLEUKIN_21_SIGNALING                         |
| 17:40392358  | RETREG3  | REACTOME_INTERLEUKIN_2_FAMILY_SIGNALING                   |
| 17:40392358  | RETREG3  | REACTOME_INTERLEUKIN_2_SIGNALING                          |
| 6:112009427  | FYN      | REACTOME_INTERLEUKIN_3_INTERLEUKIN_5_AND_GM-CSF_SIGNALING |
| 6:112056759  | FYN      | REACTOME_INTERLEUKIN_3_INTERLEUKIN_5_AND_GM-CSF_SIGNALING |
| 6:112151452  | FYN      | REACTOME_INTERLEUKIN_3_INTERLEUKIN_5_AND_GM-CSF_SIGNALING |
| 17:40392358  | RETREG3  | REACTOME_INTERLEUKIN_3_INTERLEUKIN_5_AND_GM-CSF_SIGNALING |
| 15:61293467  | VPS13C   | REACTOME_INTERLEUKIN_4_AND_INTERLEUKIN_13_SIGNALING       |
| 16:31370452  | SETD1A   | REACTOME_INTERLEUKIN_4_AND_INTERLEUKIN_13_SIGNALING       |
| 17:7578671   | V1NB1    | REACTOME_INTERLEUKIN_4_AND_INTERLEUKIN_13_SIGNALING       |
| 17:40392358  | RETREG3  | REACTOME_INTERLEUKIN_7_SIGNALING                          |
| 17:40392358  | RETREG3  | REACTOME_INTERLEUKIN_9_SIGNALING                          |
| 3:48835245   | IP6K2    | REACTOME_INTRACELLULAR_SIGNALING_BY_SECOND_MESSENGERS     |
| 3:123057397  | KPNA1    | REACTOME_INTRACELLULAR_SIGNALING_BY_SECOND_MESSENGERS     |
| 4:114424939  | CAMK2D   | REACTOME_INTRACELLULAR_SIGNALING_BY_SECOND_MESSENGERS     |
| 6:32814942   | HLA-DRB5 | REACTOME_INTRACELLULAR_SIGNALING_BY_SECOND_MESSENGERS     |
| 6:112009427  | FYN      | REACTOME_INTRACELLULAR_SIGNALING_BY_SECOND_MESSENGERS     |
| 6:112056759  | FYN      | REACTOME_INTRACELLULAR_SIGNALING_BY_SECOND_MESSENGERS     |
| 6:112151452  | FYN      | REACTOME_INTRACELLULAR_SIGNALING_BY_SECOND_MESSENGERS     |
| 17:7578671   | V1NB1    | REACTOME_INTRACELLULAR_SIGNALING_BY_SECOND_MESSENGERS     |
| 1:171689486  | VAMP4    | REACTOME_INTRA_GOLGI_AND_RETROGRADE_GOLGI_TO_ER_TRAFFIC   |
| 2:135921205  | TMEM163  | REACTOME_INTRA_GOLGI_AND_RETROGRADE_GOLGI_TO_ER_TRAFFIC   |
| 10:104005410 | GBF1     | REACTOME_INTRA_GOLGI_AND_RETROGRADE_GOLGI_TO_ER_TRAFFIC   |
| 10:104034550 | GBF1     | REACTOME_INTRA_GOLGI_AND_RETROGRADE_GOLGI_TO_ER_TRAFFIC   |
| 10:104258303 | GBF1     | REACTOME_INTRA_GOLGI_AND_RETROGRADE_GOLGI_TO_ER_TRAFFIC   |
| 12:39759090  | LRRK2_2  | REACTOME_INTRA_GOLGI_AND_RETROGRADE_GOLGI_TO_ER_TRAFFIC   |
| 17:43021962  | CRHR1_2  | REACTOME_INTRA_GOLGI_AND_RETROGRADE_GOLGI_TO_ER_TRAFFIC   |
| 17:44800946  | WNT3     | REACTOME_INTRA_GOLGI_AND_RETROGRADE_GOLGI_TO_ER_TRAFFIC   |
| 17:44833217  | WNT3     | REACTOME_INTRA_GOLGI_AND_RETROGRADE_GOLGI_TO_ER_TRAFFIC   |
| 17:45059032  | WNT3     | REACTOME_INTRA_GOLGI_AND_RETROGRADE_GOLGI_TO_ER_TRAFFIC   |
| 17:45089680  | WNT3     | REACTOME_INTRA_GOLGI_AND_RETROGRADE_GOLGI_TO_ER_TRAFFIC   |
| 17:76727455  | DNAH17   | REACTOME_INTRA_GOLGI_AND_RETROGRADE_GOLGI_TO_ER_TRAFFIC   |
| 17:44800946  | WNT3     | REACTOME_INTRA_GOLGI_TRAFFIC                              |

|              |          |                                                                                            |
|--------------|----------|--------------------------------------------------------------------------------------------|
| 17:44833217  | WNT3     | REACTOME_INTRA_GOLGI_TRAFFIC                                                               |
| 17:45059032  | WNT3     | REACTOME_INTRA_GOLGI_TRAFFIC                                                               |
| 17:45089680  | WNT3     | REACTOME_INTRA_GOLGI_TRAFFIC                                                               |
| 17:76727455  | DNAH17   | REACTOME_INTRA_GOLGI_TRAFFIC                                                               |
| 17:7578671   | V1NB1    | REACTOME_INTRINSIC_PATHWAY_FOR_APOPTOSIS                                                   |
| 17:43132290  | CRHR1_2  | REACTOME_INTRINSIC_PATHWAY_FOR_APOPTOSIS                                                   |
| 11:82582134  | DLG2     | REACTOME_INTRINSIC_PATHWAY_OF_FIBRIN_CLOT_FORMATION                                        |
| 11:82648357  | DLG2     | REACTOME_INTRINSIC_PATHWAY_OF_FIBRIN_CLOT_FORMATION                                        |
| 6:29579544   | TRIM40   | REACTOME_INWARDLY_RECTIFYING_KPLUS_CHANNELS                                                |
| 21:39197323  | DYRK1A   | REACTOME_INWARDLY_RECTIFYING_KPLUS_CHANNELS                                                |
| 1:154306180  | GBAP1    | REACTOME_ION_CHANNEL_TRANSPORT                                                             |
| 4:114424939  | CAMK2D   | REACTOME_ION_CHANNEL_TRANSPORT                                                             |
| 4:170563153  | CLCN3    | REACTOME_ION_CHANNEL_TRANSPORT                                                             |
| 4:170569172  | CLCN3    | REACTOME_ION_CHANNEL_TRANSPORT                                                             |
| 4:170620812  | CLCN3    | REACTOME_ION_CHANNEL_TRANSPORT                                                             |
| 12:45755099  | SCAF11   | REACTOME_ION_CHANNEL_TRANSPORT                                                             |
| 12:124219791 | HIP1R    | REACTOME_ION_CHANNEL_TRANSPORT                                                             |
| 17:7560294   | V1NB1    | REACTOME_ION_CHANNEL_TRANSPORT                                                             |
| 17:40938261  | RETREG3  | REACTOME_ION_CHANNEL_TRANSPORT                                                             |
| 19:1811130   | SPPL2B   | REACTOME_ION_CHANNEL_TRANSPORT                                                             |
| 4:114424939  | CAMK2D   | REACTOME_ION_HOMEOSTASIS                                                                   |
| 17:7560294   | V1NB1    | REACTOME_ION_HOMEOSTASIS                                                                   |
| 17:7101771   | V1NB1    | REACTOME_IONOTROPIC_ACTIVITY_OF_KAINATE_RECEPTORS                                          |
| 1:154306180  | GBAP1    | REACTOME_ION_TRANSPORT_BY_P_TYPE_ATPASES                                                   |
| 4:114424939  | CAMK2D   | REACTOME_ION_TRANSPORT_BY_P_TYPE_ATPASES                                                   |
| 17:7560294   | V1NB1    | REACTOME_ION_TRANSPORT_BY_P_TYPE_ATPASES                                                   |
| 19:1811130   | SPPL2B   | REACTOME_ION_TRANSPORT_BY_P_TYPE_ATPASES                                                   |
| 1:156059276  | GBAP1    | REACTOME_IRE1ALPHA_ACTIVATES_CHAPERONES                                                    |
| 3:150298317  | MED12L   | REACTOME_IRE1ALPHA_ACTIVATES_CHAPERONES                                                    |
| 17:45059032  | WNT3     | REACTOME_IRE1ALPHA_ACTIVATES_CHAPERONES                                                    |
| 17:45089680  | WNT3     | REACTOME_IRE1ALPHA_ACTIVATES_CHAPERONES                                                    |
| 4:15608677   | BST1     | REACTOME_IRON_UPTAKE_AND_TRANSPORT                                                         |
| 12:124219791 | HIP1R    | REACTOME_IRON_UPTAKE_AND_TRANSPORT                                                         |
| 16:50730088  | CASC16   | REACTOME_JNK_C_JUN_KINASES_PHOSPHORYLATION_AND_ACTIVATION_MEDIATED_BY_ACTIVATED_HUMAN_TAK1 |
| 16:50730446  | CASC16   | REACTOME_JNK_C_JUN_KINASES_PHOSPHORYLATION_AND_ACTIVATION_MEDIATED_BY_ACTIVATED_HUMAN_TAK1 |
| 16:50745926  | CASC16   | REACTOME_JNK_C_JUN_KINASES_PHOSPHORYLATION_AND_ACTIVATION_MEDIATED_BY_ACTIVATED_HUMAN_TAK1 |
| 17:39883520  | RETREG3  | REACTOME_KERATINIZATION                                                                    |
| 12:39759090  | LRRK2_2  | REACTOME_KINESINS                                                                          |
| 17:43021962  | CRHR1_2  | REACTOME_KINESINS                                                                          |
| 1:171945488  | VAMP4    | REACTOME_L1CAM_INTERACTIONS                                                                |
| 1:172137119  | VAMP4    | REACTOME_L1CAM_INTERACTIONS                                                                |
| 1:172386261  | VAMP4    | REACTOME_L1CAM_INTERACTIONS                                                                |
| 4:113938109  | CAMK2D   | REACTOME_L1CAM_INTERACTIONS                                                                |
| 4:114077386  | CAMK2D   | REACTOME_L1CAM_INTERACTIONS                                                                |
| 4:114217997  | CAMK2D   | REACTOME_L1CAM_INTERACTIONS                                                                |
| 9:17579690   | SH3GL2_2 | REACTOME_L1CAM_INTERACTIONS                                                                |
| 9:17609302   | SH3GL2_2 | REACTOME_L1CAM_INTERACTIONS                                                                |
| 9:17627444   | SH3GL2_2 | REACTOME_L1CAM_INTERACTIONS                                                                |
| 9:17710876   | SH3GL2_2 | REACTOME_L1CAM_INTERACTIONS                                                                |
| 9:17732590   | SH3GL2_2 | REACTOME_L1CAM_INTERACTIONS                                                                |
| 9:17737514   | SH3GL2_2 | REACTOME_L1CAM_INTERACTIONS                                                                |
| 9:17758945   | SH3GL2_2 | REACTOME_L1CAM_INTERACTIONS                                                                |
| 12:41147295  | LRRK2_2  | REACTOME_L1CAM_INTERACTIONS                                                                |

|              |                 |                                                       |
|--------------|-----------------|-------------------------------------------------------|
| 12:41251554  | <i>LRRK2_2</i>  | REACTOME_L1CAM_INTERACTIONS                           |
| 12:41407403  | <i>LRRK2_2</i>  | REACTOME_L1CAM_INTERACTIONS                           |
| 17:7101771   | <i>V1NB1</i>    | REACTOME_L1CAM_INTERACTIONS                           |
| 3:49162284   | <i>IP6K2</i>    | REACTOME_LAMININ_INTERACTIONS                         |
| 3:49162583   | <i>IP6K2</i>    | REACTOME_LAMININ_INTERACTIONS                         |
| 6:112561154  | <i>FYN</i>      | REACTOME_LAMININ_INTERACTIONS                         |
| 16:31004169  | <i>SETD1A</i>   | REACTOME_LGI_ADAM_INTERACTIONS                        |
| 17:7101771   | <i>V1NB1</i>    | REACTOME_LGI_ADAM_INTERACTIONS                        |
| 9:17579690   | <i>SH3GL2_2</i> | REACTOME_LISTERIA_MONOCYTOGENES_ENTRY_INTO_HOST_CELLS |
| 9:17609302   | <i>SH3GL2_2</i> | REACTOME_LISTERIA_MONOCYTOGENES_ENTRY_INTO_HOST_CELLS |
| 9:17627444   | <i>SH3GL2_2</i> | REACTOME_LISTERIA_MONOCYTOGENES_ENTRY_INTO_HOST_CELLS |
| 9:17710876   | <i>SH3GL2_2</i> | REACTOME_LISTERIA_MONOCYTOGENES_ENTRY_INTO_HOST_CELLS |
| 9:17732590   | <i>SH3GL2_2</i> | REACTOME_LISTERIA_MONOCYTOGENES_ENTRY_INTO_HOST_CELLS |
| 9:17737514   | <i>SH3GL2_2</i> | REACTOME_LISTERIA_MONOCYTOGENES_ENTRY_INTO_HOST_CELLS |
| 9:17758945   | <i>SH3GL2_2</i> | REACTOME_LISTERIA_MONOCYTOGENES_ENTRY_INTO_HOST_CELLS |
| 4:114424939  | <i>CAMK2D</i>   | REACTOME_LONG_TERM_POTENTIATION                       |
| 11:83188607  | <i>DLG2</i>     | REACTOME_LONG_TERM_POTENTIATION                       |
| 11:83219006  | <i>DLG2</i>     | REACTOME_LONG_TERM_POTENTIATION                       |
| 11:83538733  | <i>DLG2</i>     | REACTOME_LONG_TERM_POTENTIATION                       |
| 11:83544472  | <i>DLG2</i>     | REACTOME_LONG_TERM_POTENTIATION                       |
| 11:83656201  | <i>DLG2</i>     | REACTOME_LONG_TERM_POTENTIATION                       |
| 11:83700228  | <i>DLG2</i>     | REACTOME_LONG_TERM_POTENTIATION                       |
| 11:83762918  | <i>DLG2</i>     | REACTOME_LONG_TERM_POTENTIATION                       |
| 11:83894247  | <i>DLG2</i>     | REACTOME_LONG_TERM_POTENTIATION                       |
| 11:84021037  | <i>DLG2</i>     | REACTOME_LONG_TERM_POTENTIATION                       |
| 11:84324361  | <i>DLG2</i>     | REACTOME_LONG_TERM_POTENTIATION                       |
| 11:84373496  | <i>DLG2</i>     | REACTOME_LONG_TERM_POTENTIATION                       |
| 11:84403409  | <i>DLG2</i>     | REACTOME_LONG_TERM_POTENTIATION                       |
| 17:7101771   | <i>V1NB1</i>    | REACTOME_LONG_TERM_POTENTIATION                       |
| 9:17579690   | <i>SH3GL2_2</i> | REACTOME_LYSOSOME_VESICLE_BIOGENESIS                  |
| 9:17609302   | <i>SH3GL2_2</i> | REACTOME_LYSOSOME_VESICLE_BIOGENESIS                  |
| 9:17627444   | <i>SH3GL2_2</i> | REACTOME_LYSOSOME_VESICLE_BIOGENESIS                  |
| 9:17710876   | <i>SH3GL2_2</i> | REACTOME_LYSOSOME_VESICLE_BIOGENESIS                  |
| 9:17732590   | <i>SH3GL2_2</i> | REACTOME_LYSOSOME_VESICLE_BIOGENESIS                  |
| 9:17737514   | <i>SH3GL2_2</i> | REACTOME_LYSOSOME_VESICLE_BIOGENESIS                  |
| 9:17758945   | <i>SH3GL2_2</i> | REACTOME_LYSOSOME_VESICLE_BIOGENESIS                  |
| 12:133295501 | <i>FBRSL1</i>   | REACTOME_MACROAUTOPHAGY                               |
| 10:103185542 | <i>GBF1</i>     | REACTOME_MAP3K8_TPL2_DEPENDENT_MAPK1_3_ACTIVATION     |
| 10:103308244 | <i>GBF1</i>     | REACTOME_MAP3K8_TPL2_DEPENDENT_MAPK1_3_ACTIVATION     |
| 6:32814942   | <i>HLA-DRB5</i> | REACTOME_MAPK6_MAPK4_SIGNALING                        |
| 4:114424939  | <i>CAMK2D</i>   | REACTOME_MAPK_FAMILY_SIGNALING_CASCADES               |
| 6:32814942   | <i>HLA-DRB5</i> | REACTOME_MAPK_FAMILY_SIGNALING_CASCADES               |
| 6:112009427  | <i>FYN</i>      | REACTOME_MAPK_FAMILY_SIGNALING_CASCADES               |
| 6:112056759  | <i>FYN</i>      | REACTOME_MAPK_FAMILY_SIGNALING_CASCADES               |
| 6:112151452  | <i>FYN</i>      | REACTOME_MAPK_FAMILY_SIGNALING_CASCADES               |
| 8:21665306   | <i>BIN3</i>     | REACTOME_MAPK_FAMILY_SIGNALING_CASCADES               |
| 8:21668901   | <i>BIN3</i>     | REACTOME_MAPK_FAMILY_SIGNALING_CASCADES               |
| 11:83188607  | <i>DLG2</i>     | REACTOME_MAPK_FAMILY_SIGNALING_CASCADES               |
| 11:83219006  | <i>DLG2</i>     | REACTOME_MAPK_FAMILY_SIGNALING_CASCADES               |
| 11:83538733  | <i>DLG2</i>     | REACTOME_MAPK_FAMILY_SIGNALING_CASCADES               |
| 11:83544472  | <i>DLG2</i>     | REACTOME_MAPK_FAMILY_SIGNALING_CASCADES               |
| 11:83656201  | <i>DLG2</i>     | REACTOME_MAPK_FAMILY_SIGNALING_CASCADES               |
| 11:83700228  | <i>DLG2</i>     | REACTOME_MAPK_FAMILY_SIGNALING_CASCADES               |

|              |                     |                                                              |
|--------------|---------------------|--------------------------------------------------------------|
| 11:83762918  | <i>DLG2</i>         | REACTOME_MAPK_FAMILY_SIGNALING_CASCADES                      |
| 11:83894247  | <i>DLG2</i>         | REACTOME_MAPK_FAMILY_SIGNALING_CASCADES                      |
| 11:84021037  | <i>DLG2</i>         | REACTOME_MAPK_FAMILY_SIGNALING_CASCADES                      |
| 11:84324361  | <i>DLG2</i>         | REACTOME_MAPK_FAMILY_SIGNALING_CASCADES                      |
| 11:84373496  | <i>DLG2</i>         | REACTOME_MAPK_FAMILY_SIGNALING_CASCADES                      |
| 11:84403409  | <i>DLG2</i>         | REACTOME_MAPK_FAMILY_SIGNALING_CASCADES                      |
| 17:7101771   | <i>V1NB1</i>        | REACTOME_MAPK_FAMILY_SIGNALING_CASCADES                      |
| 1:156059276  | <i>GBAP1</i>        | REACTOME_MEIOSIS                                             |
| 14:75495059  | <i>RPS6KL1</i>      | REACTOME_MEIOSIS                                             |
| 14:75495059  | <i>RPS6KL1</i>      | REACTOME_MEIOTIC_RECOMBINATION                               |
| 1:156059276  | <i>GBAP1</i>        | REACTOME_MEIOTIC_SYNAPSIS                                    |
| 10:104591639 | <i>GBF1</i>         | REACTOME_METABOLIC_DISORDERS_OF_BIOLOGICAL_OXIDATION_ENZYMES |
| 1:226108200  | <i>ITPKB</i>        | REACTOME_METABOLISM_OF_AMINO_ACIDS_AND_DERIVATIVES           |
| 3:182760073  | <i>MCCC1</i>        | REACTOME_METABOLISM_OF_AMINO_ACIDS_AND_DERIVATIVES           |
| 6:32814942   | <i>HLA-DRB5</i>     | REACTOME_METABOLISM_OF_AMINO_ACIDS_AND_DERIVATIVES           |
| 12:133295501 | <i>FBRSL1</i>       | REACTOME_METABOLISM_OF_AMINO_ACIDS_AND_DERIVATIVES           |
| 6:33252561   | <i>HLA-DRB5</i>     | REACTOME_METABOLISM_OF_CARBOHYDRATES                         |
| 6:71594785   | <i>RIMS1</i>        | REACTOME_METABOLISM_OF_CARBOHYDRATES                         |
| 7:65425894   | <i>GS1-124K5.11</i> | REACTOME_METABOLISM_OF_CARBOHYDRATES                         |
| 17:41056283  | <i>RETREG3</i>      | REACTOME_METABOLISM_OF_CARBOHYDRATES                         |
| 14:55348869  | <i>GCH1</i>         | REACTOME_METABOLISM_OF_COFACTORS                             |
| 16:19085298  | <i>SYT17</i>        | REACTOME_METABOLISM_OF_COFACTORS                             |
| 2:169999639  | <i>STK39</i>        | REACTOME_METABOLISM_OF_FAT_SOLUBLE_VITAMINS                  |
| 2:170028024  | <i>STK39</i>        | REACTOME_METABOLISM_OF_FAT_SOLUBLE_VITAMINS                  |
| 2:96858914   | <i>KCNIP3</i>       | REACTOME_METABOLISM_OF_LIPIDS                                |
| 2:101439596  | <i>MAP4K4</i>       | REACTOME_METABOLISM_OF_LIPIDS                                |
| 2:101550181  | <i>MAP4K4</i>       | REACTOME_METABOLISM_OF_LIPIDS                                |
| 2:101603812  | <i>MAP4K4</i>       | REACTOME_METABOLISM_OF_LIPIDS                                |
| 2:169389091  | <i>STK39</i>        | REACTOME_METABOLISM_OF_LIPIDS                                |
| 2:169999639  | <i>STK39</i>        | REACTOME_METABOLISM_OF_LIPIDS                                |
| 2:170028024  | <i>STK39</i>        | REACTOME_METABOLISM_OF_LIPIDS                                |
| 3:160668220  | <i>SPTSSB</i>       | REACTOME_METABOLISM_OF_LIPIDS                                |
| 3:160817877  | <i>SPTSSB</i>       | REACTOME_METABOLISM_OF_LIPIDS                                |
| 3:161068566  | <i>SPTSSB</i>       | REACTOME_METABOLISM_OF_LIPIDS                                |
| 3:161075189  | <i>SPTSSB</i>       | REACTOME_METABOLISM_OF_LIPIDS                                |
| 4:17622910   | <i>LCORL</i>        | REACTOME_METABOLISM_OF_LIPIDS                                |
| 4:17632603   | <i>LCORL</i>        | REACTOME_METABOLISM_OF_LIPIDS                                |
| 5:60053220   | <i>ELOVL7</i>       | REACTOME_METABOLISM_OF_LIPIDS                                |
| 6:31846234   | <i>HLA-DRB5</i>     | REACTOME_METABOLISM_OF_LIPIDS                                |
| 6:32126002   | <i>HLA-DRB5</i>     | REACTOME_METABOLISM_OF_LIPIDS                                |
| 10:104591639 | <i>GBF1</i>         | REACTOME_METABOLISM_OF_LIPIDS                                |
| 10:121505277 | <i>INPP5F</i>       | REACTOME_METABOLISM_OF_LIPIDS                                |
| 10:121538407 | <i>INPP5F</i>       | REACTOME_METABOLISM_OF_LIPIDS                                |
| 12:123561638 | <i>HIP1R</i>        | REACTOME_METABOLISM_OF_LIPIDS                                |
| 12:123585705 | <i>HIP1R</i>        | REACTOME_METABOLISM_OF_LIPIDS                                |
| 14:88393900  | <i>GALC</i>         | REACTOME_METABOLISM_OF_LIPIDS                                |
| 14:88443553  | <i>GALC</i>         | REACTOME_METABOLISM_OF_LIPIDS                                |
| 15:61293467  | <i>VPS13C</i>       | REACTOME_METABOLISM_OF_LIPIDS                                |
| 16:30999462  | <i>SETD1A</i>       | REACTOME_METABOLISM_OF_LIPIDS                                |
| 17:7983799   | <i>V1NB1</i>        | REACTOME_METABOLISM_OF_LIPIDS                                |
| 17:8019125   | <i>V1NB1</i>        | REACTOME_METABOLISM_OF_LIPIDS                                |
| 20:6011934   | <i>CRLS1</i>        | REACTOME_METABOLISM_OF_LIPIDS                                |
| 10:104847713 | <i>GBF1</i>         | REACTOME_METABOLISM_OF_NUCLEOTIDES                           |

|              |                 |                                                             |
|--------------|-----------------|-------------------------------------------------------------|
| 10:104861736 | <i>GBF1</i>     | REACTOME_METABOLISM_OF_NUCLEOTIDES                          |
| 10:104926485 | <i>GBF1</i>     | REACTOME_METABOLISM_OF_NUCLEOTIDES                          |
| 10:104929716 | <i>GBF1</i>     | REACTOME_METABOLISM_OF_NUCLEOTIDES                          |
| 11:10392432  | <i>RNF141</i>   | REACTOME_METABOLISM_OF_NUCLEOTIDES                          |
| 11:10487997  | <i>RNF141</i>   | REACTOME_METABOLISM_OF_NUCLEOTIDES                          |
| 14:74477206  | <i>RPS6KL1</i>  | REACTOME_METABOLISM_OF_NUCLEOTIDES                          |
| 16:30438930  | <i>SETD1A</i>   | REACTOME_METABOLISM_OF_NUCLEOTIDES                          |
| 17:76177567  | <i>DNAH17</i>   | REACTOME_METABOLISM_OF_NUCLEOTIDES                          |
| 6:32814942   | <i>HLA-DRB5</i> | REACTOME_METABOLISM_OF_POLYAMINES                           |
| 6:30628082   | <i>TRIM40</i>   | REACTOME_METABOLISM_OF_RNA                                  |
| 6:30631063   | <i>TRIM40</i>   | REACTOME_METABOLISM_OF_RNA                                  |
| 6:30639369   | <i>TRIM40</i>   | REACTOME_METABOLISM_OF_RNA                                  |
| 6:32814942   | <i>HLA-DRB5</i> | REACTOME_METABOLISM_OF_RNA                                  |
| 6:33252561   | <i>HLA-DRB5</i> | REACTOME_METABOLISM_OF_RNA                                  |
| 7:23382980   | <i>GPNMB</i>    | REACTOME_METABOLISM_OF_RNA                                  |
| 7:23385251   | <i>GPNMB</i>    | REACTOME_METABOLISM_OF_RNA                                  |
| 7:23387110   | <i>GPNMB</i>    | REACTOME_METABOLISM_OF_RNA                                  |
| 7:23446436   | <i>GPNMB</i>    | REACTOME_METABOLISM_OF_RNA                                  |
| 7:23495961   | <i>GPNMB</i>    | REACTOME_METABOLISM_OF_RNA                                  |
| 11:82886475  | <i>DLG2</i>     | REACTOME_METABOLISM_OF_RNA                                  |
| 17:7479140   | <i>V1NB1</i>    | REACTOME_METABOLISM_OF_RNA                                  |
| 17:7480325   | <i>V1NB1</i>    | REACTOME_METABOLISM_OF_RNA                                  |
| 17:42929985  | <i>CRHR1_2</i>  | REACTOME_METABOLISM_OF_RNA                                  |
| 10:104591639 | <i>GBF1</i>     | REACTOME_METABOLISM_OF_STEROID_HORMONES                     |
| 2:169999639  | <i>STK39</i>    | REACTOME_METABOLISM_OF_STEROIDS                             |
| 2:170028024  | <i>STK39</i>    | REACTOME_METABOLISM_OF_STEROIDS                             |
| 10:104591639 | <i>GBF1</i>     | REACTOME_METABOLISM_OF_STEROIDS                             |
| 16:30999462  | <i>SETD1A</i>   | REACTOME_METABOLISM_OF_STEROIDS                             |
| 2:169999639  | <i>STK39</i>    | REACTOME_METABOLISM_OF_VITAMINS_AND_COFACTORS               |
| 2:170028024  | <i>STK39</i>    | REACTOME_METABOLISM_OF_VITAMINS_AND_COFACTORS               |
| 3:122259640  | <i>KPNA1</i>    | REACTOME_METABOLISM_OF_VITAMINS_AND_COFACTORS               |
| 3:182760073  | <i>MCCC1</i>    | REACTOME_METABOLISM_OF_VITAMINS_AND_COFACTORS               |
| 4:15709252   | <i>BST1</i>     | REACTOME_METABOLISM_OF_VITAMINS_AND_COFACTORS               |
| 4:15713608   | <i>BST1</i>     | REACTOME_METABOLISM_OF_VITAMINS_AND_COFACTORS               |
| 4:15724372   | <i>BST1</i>     | REACTOME_METABOLISM_OF_VITAMINS_AND_COFACTORS               |
| 4:15737882   | <i>BST1</i>     | REACTOME_METABOLISM_OF_VITAMINS_AND_COFACTORS               |
| 4:15789288   | <i>BST1</i>     | REACTOME_METABOLISM_OF_VITAMINS_AND_COFACTORS               |
| 4:15816670   | <i>BST1</i>     | REACTOME_METABOLISM_OF_VITAMINS_AND_COFACTORS               |
| 4:15829612   | <i>BST1</i>     | REACTOME_METABOLISM_OF_VITAMINS_AND_COFACTORS               |
| 6:133025715  | <i>RPS12</i>    | REACTOME_METABOLISM_OF_VITAMINS_AND_COFACTORS               |
| 6:133028870  | <i>RPS12</i>    | REACTOME_METABOLISM_OF_VITAMINS_AND_COFACTORS               |
| 6:133034076  | <i>RPS12</i>    | REACTOME_METABOLISM_OF_VITAMINS_AND_COFACTORS               |
| 9:33791164   | <i>UBAP2</i>    | REACTOME_METABOLISM_OF_VITAMINS_AND_COFACTORS               |
| 14:55348869  | <i>GCH1</i>     | REACTOME_METABOLISM_OF_VITAMINS_AND_COFACTORS               |
| 16:19085298  | <i>SYT17</i>    | REACTOME_METABOLISM_OF_VITAMINS_AND_COFACTORS               |
| 21:38328886  | <i>DYRK1A</i>   | REACTOME_METABOLISM_OF_VITAMINS_AND_COFACTORS               |
| 3:122259640  | <i>KPNA1</i>    | REACTOME_METABOLISM_OF_WATER_SOLUBLE_VITAMINS_AND_COFACTORS |
| 3:182760073  | <i>MCCC1</i>    | REACTOME_METABOLISM_OF_WATER_SOLUBLE_VITAMINS_AND_COFACTORS |
| 4:15709252   | <i>BST1</i>     | REACTOME_METABOLISM_OF_WATER_SOLUBLE_VITAMINS_AND_COFACTORS |
| 4:15713608   | <i>BST1</i>     | REACTOME_METABOLISM_OF_WATER_SOLUBLE_VITAMINS_AND_COFACTORS |
| 4:15724372   | <i>BST1</i>     | REACTOME_METABOLISM_OF_WATER_SOLUBLE_VITAMINS_AND_COFACTORS |
| 4:15737882   | <i>BST1</i>     | REACTOME_METABOLISM_OF_WATER_SOLUBLE_VITAMINS_AND_COFACTORS |
| 4:15789288   | <i>BST1</i>     | REACTOME_METABOLISM_OF_WATER_SOLUBLE_VITAMINS_AND_COFACTORS |

|              |                 |                                                             |
|--------------|-----------------|-------------------------------------------------------------|
| 4:15816670   | <i>BST1</i>     | REACTOME_METABOLISM_OF_WATER_SOLUBLE_VITAMINS_AND_COFACTORS |
| 4:15829612   | <i>BST1</i>     | REACTOME_METABOLISM_OF_WATER_SOLUBLE_VITAMINS_AND_COFACTORS |
| 6:133025715  | <i>RPS12</i>    | REACTOME_METABOLISM_OF_WATER_SOLUBLE_VITAMINS_AND_COFACTORS |
| 6:133028870  | <i>RPS12</i>    | REACTOME_METABOLISM_OF_WATER_SOLUBLE_VITAMINS_AND_COFACTORS |
| 6:133034076  | <i>RPS12</i>    | REACTOME_METABOLISM_OF_WATER_SOLUBLE_VITAMINS_AND_COFACTORS |
| 9:33791164   | <i>UBAP2</i>    | REACTOME_METABOLISM_OF_WATER_SOLUBLE_VITAMINS_AND_COFACTORS |
| 21:38328886  | <i>DYRK1A</i>   | REACTOME_METABOLISM_OF_WATER_SOLUBLE_VITAMINS_AND_COFACTORS |
| 3:49162284   | <i>IP6K2</i>    | REACTOME_MET_ACTIVATES_PTK2_SIGNALING                       |
| 3:49162583   | <i>IP6K2</i>    | REACTOME_MET_ACTIVATES_PTK2_SIGNALING                       |
| 6:33153528   | <i>HLA-DRB5</i> | REACTOME_MET_ACTIVATES_PTK2_SIGNALING                       |
| 6:112561154  | <i>FYN</i>      | REACTOME_MET_ACTIVATES_PTK2_SIGNALING                       |
| 10:104635620 | <i>GBF1</i>     | REACTOME_METHYLATION                                        |
| 3:49162284   | <i>IP6K2</i>    | REACTOME_MET_PROMOTES_CELL_MOTILITY                         |
| 3:49162583   | <i>IP6K2</i>    | REACTOME_MET_PROMOTES_CELL_MOTILITY                         |
| 6:33153528   | <i>HLA-DRB5</i> | REACTOME_MET_PROMOTES_CELL_MOTILITY                         |
| 6:112561154  | <i>FYN</i>      | REACTOME_MET_PROMOTES_CELL_MOTILITY                         |
| 1:171945488  | <i>VAMP4</i>    | REACTOME_MHC_CLASS_II_ANTIGEN_PRESENTATION                  |
| 1:172137119  | <i>VAMP4</i>    | REACTOME_MHC_CLASS_II_ANTIGEN_PRESENTATION                  |
| 1:172386261  | <i>VAMP4</i>    | REACTOME_MHC_CLASS_II_ANTIGEN_PRESENTATION                  |
| 6:32602372   | <i>HLA-DRB5</i> | REACTOME_MHC_CLASS_II_ANTIGEN_PRESENTATION                  |
| 6:32930679   | <i>HLA-DRB5</i> | REACTOME_MHC_CLASS_II_ANTIGEN_PRESENTATION                  |
| 6:32934409   | <i>HLA-DRB5</i> | REACTOME_MHC_CLASS_II_ANTIGEN_PRESENTATION                  |
| 6:32973303   | <i>HLA-DRB5</i> | REACTOME_MHC_CLASS_II_ANTIGEN_PRESENTATION                  |
| 6:32974268   | <i>HLA-DRB5</i> | REACTOME_MHC_CLASS_II_ANTIGEN_PRESENTATION                  |
| 8:11712443   | <i>CTSB</i>     | REACTOME_MHC_CLASS_II_ANTIGEN_PRESENTATION                  |
| 9:17579690   | <i>SH3GL2_2</i> | REACTOME_MHC_CLASS_II_ANTIGEN_PRESENTATION                  |
| 9:17609302   | <i>SH3GL2_2</i> | REACTOME_MHC_CLASS_II_ANTIGEN_PRESENTATION                  |
| 9:17627444   | <i>SH3GL2_2</i> | REACTOME_MHC_CLASS_II_ANTIGEN_PRESENTATION                  |
| 9:17710876   | <i>SH3GL2_2</i> | REACTOME_MHC_CLASS_II_ANTIGEN_PRESENTATION                  |
| 9:17732590   | <i>SH3GL2_2</i> | REACTOME_MHC_CLASS_II_ANTIGEN_PRESENTATION                  |
| 9:17737514   | <i>SH3GL2_2</i> | REACTOME_MHC_CLASS_II_ANTIGEN_PRESENTATION                  |
| 9:17758945   | <i>SH3GL2_2</i> | REACTOME_MHC_CLASS_II_ANTIGEN_PRESENTATION                  |
| 10:104258303 | <i>GBF1</i>     | REACTOME_MHC_CLASS_II_ANTIGEN_PRESENTATION                  |
| 8:17125768   | <i>FGF20</i>    | REACTOME_MICROAUTOPHAGY                                     |
| 1:155181232  | <i>GBAP1</i>    | REACTOME_MITOCHONDRIAL_BIOGENESIS                           |
| 8:23415524   | <i>BIN3</i>     | REACTOME_MITOCHONDRIAL_IRON_SULFUR_CLUSTER_BIOGENESIS       |
| 1:155181232  | <i>GBAP1</i>    | REACTOME_MITOCHONDRIAL_PROTEIN_IMPORT                       |
| 1:155698425  | <i>GBAP1</i>    | REACTOME_MITOCHONDRIAL_TRANSLATION                          |
| 12:133295501 | <i>FBRSL1</i>   | REACTOME_MITOPHAGY                                          |
| 3:48199695   | <i>IP6K2</i>    | REACTOME_MITOTIC_G1_G1_S_PHASES                             |
| 3:48214438   | <i>IP6K2</i>    | REACTOME_MITOTIC_G1_G1_S_PHASES                             |
| 6:32814942   | <i>HLA-DRB5</i> | REACTOME_MITOTIC_G1_G1_S_PHASES                             |
| 12:133206648 | <i>FBRSL1</i>   | REACTOME_MITOTIC_G1_G1_S_PHASES                             |
| 12:133223685 | <i>FBRSL1</i>   | REACTOME_MITOTIC_G1_G1_S_PHASES                             |
| 12:133225045 | <i>FBRSL1</i>   | REACTOME_MITOTIC_G1_G1_S_PHASES                             |
| 17:76177567  | <i>DNAH17</i>   | REACTOME_MITOTIC_G1_G1_S_PHASES                             |
| 20:5934513   | <i>CRSL1</i>    | REACTOME_MITOTIC_G1_G1_S_PHASES                             |
| 20:5968737   | <i>CRSL1</i>    | REACTOME_MITOTIC_G1_G1_S_PHASES                             |
| 20:5968964   | <i>CRSL1</i>    | REACTOME_MITOTIC_G1_G1_S_PHASES                             |
| 21:38740824  | <i>DYRK1A</i>   | REACTOME_MITOTIC_G1_G1_S_PHASES                             |
| 21:38770530  | <i>DYRK1A</i>   | REACTOME_MITOTIC_G1_G1_S_PHASES                             |
| 3:48199695   | <i>IP6K2</i>    | REACTOME_MITOTIC_G2_G2_M_PHASES                             |
| 3:48214438   | <i>IP6K2</i>    | REACTOME_MITOTIC_G2_G2_M_PHASES                             |

|              |                     |                                                   |
|--------------|---------------------|---------------------------------------------------|
| 6:32814942   | <i>HLA-DRB5</i>     | REACTOME_MITOTIC_G2_G2_M_PHASES                   |
| 10:103185542 | <i>GBF1</i>         | REACTOME_MITOTIC_G2_G2_M_PHASES                   |
| 10:103308244 | <i>GBF1</i>         | REACTOME_MITOTIC_G2_G2_M_PHASES                   |
| 10:104258303 | <i>GBF1</i>         | REACTOME_MITOTIC_G2_G2_M_PHASES                   |
| 17:7578671   | <i>V1NB1</i>        | REACTOME_MITOTIC_G2_G2_M_PHASES                   |
| 17:40818584  | <i>RETREG3</i>      | REACTOME_MITOTIC_G2_G2_M_PHASES                   |
| 1:156059276  | <i>GBAP1</i>        | REACTOME_MITOTIC_METAPHASE_AND_ANAPHASE           |
| 6:32814942   | <i>HLA-DRB5</i>     | REACTOME_MITOTIC_METAPHASE_AND_ANAPHASE           |
| 12:122816734 | <i>HIP1R</i>        | REACTOME_MITOTIC_METAPHASE_AND_ANAPHASE           |
| 12:122817580 | <i>HIP1R</i>        | REACTOME_MITOTIC_METAPHASE_AND_ANAPHASE           |
| 12:122853197 | <i>HIP1R</i>        | REACTOME_MITOTIC_METAPHASE_AND_ANAPHASE           |
| 12:123057792 | <i>HIP1R</i>        | REACTOME_MITOTIC_METAPHASE_AND_ANAPHASE           |
| 12:123110365 | <i>HIP1R</i>        | REACTOME_MITOTIC_METAPHASE_AND_ANAPHASE           |
| 12:123110785 | <i>HIP1R</i>        | REACTOME_MITOTIC_METAPHASE_AND_ANAPHASE           |
| 17:45215865  | <i>WNT3</i>         | REACTOME_MITOTIC_METAPHASE_AND_ANAPHASE           |
| 17:45244822  | <i>WNT3</i>         | REACTOME_MITOTIC_METAPHASE_AND_ANAPHASE           |
| 10:104258303 | <i>GBF1</i>         | REACTOME_MITOTIC_PROMETAPHASE                     |
| 12:122816734 | <i>HIP1R</i>        | REACTOME_MITOTIC_PROMETAPHASE                     |
| 12:122817580 | <i>HIP1R</i>        | REACTOME_MITOTIC_PROMETAPHASE                     |
| 12:122853197 | <i>HIP1R</i>        | REACTOME_MITOTIC_PROMETAPHASE                     |
| 12:123057792 | <i>HIP1R</i>        | REACTOME_MITOTIC_PROMETAPHASE                     |
| 12:123110365 | <i>HIP1R</i>        | REACTOME_MITOTIC_PROMETAPHASE                     |
| 12:123110785 | <i>HIP1R</i>        | REACTOME_MITOTIC_PROMETAPHASE                     |
| 17:40818584  | <i>RETREG3</i>      | REACTOME_MITOTIC_PROMETAPHASE                     |
| 1:156059276  | <i>GBAP1</i>        | REACTOME_MITOTIC_PROPHASE                         |
| 4:76695927   | <i>FAM47E-STBD1</i> | REACTOME_MITOTIC_PROPHASE                         |
| 12:122816734 | <i>HIP1R</i>        | REACTOME_MITOTIC_SPINDLE_CHECKPOINT               |
| 12:122817580 | <i>HIP1R</i>        | REACTOME_MITOTIC_SPINDLE_CHECKPOINT               |
| 12:122853197 | <i>HIP1R</i>        | REACTOME_MITOTIC_SPINDLE_CHECKPOINT               |
| 12:123057792 | <i>HIP1R</i>        | REACTOME_MITOTIC_SPINDLE_CHECKPOINT               |
| 12:123110365 | <i>HIP1R</i>        | REACTOME_MITOTIC_SPINDLE_CHECKPOINT               |
| 12:123110785 | <i>HIP1R</i>        | REACTOME_MITOTIC_SPINDLE_CHECKPOINT               |
| 17:45215865  | <i>WNT3</i>         | REACTOME_MITOTIC_SPINDLE_CHECKPOINT               |
| 17:45244822  | <i>WNT3</i>         | REACTOME_MITOTIC_SPINDLE_CHECKPOINT               |
| 10:15569598  | <i>ITGA8</i>        | REACTOME_MOLECULES_ASSOCIATED_WITH_ELASTIC_FIBRES |
| 10:15652368  | <i>ITGA8</i>        | REACTOME_MOLECULES_ASSOCIATED_WITH_ELASTIC_FIBRES |
| 14:75057014  | <i>RPS6KL1</i>      | REACTOME_MOLECULES_ASSOCIATED_WITH_ELASTIC_FIBRES |
| 1:156059276  | <i>GBAP1</i>        | REACTOME_M_PHASE                                  |
| 4:76695927   | <i>FAM47E-STBD1</i> | REACTOME_M_PHASE                                  |
| 6:32814942   | <i>HLA-DRB5</i>     | REACTOME_M_PHASE                                  |
| 10:104258303 | <i>GBF1</i>         | REACTOME_M_PHASE                                  |
| 12:122816734 | <i>HIP1R</i>        | REACTOME_M_PHASE                                  |
| 12:122817580 | <i>HIP1R</i>        | REACTOME_M_PHASE                                  |
| 12:122853197 | <i>HIP1R</i>        | REACTOME_M_PHASE                                  |
| 12:123057792 | <i>HIP1R</i>        | REACTOME_M_PHASE                                  |
| 12:123110365 | <i>HIP1R</i>        | REACTOME_M_PHASE                                  |
| 12:123110785 | <i>HIP1R</i>        | REACTOME_M_PHASE                                  |
| 17:40818584  | <i>RETREG3</i>      | REACTOME_M_PHASE                                  |
| 17:45215865  | <i>WNT3</i>         | REACTOME_M_PHASE                                  |
| 17:45244822  | <i>WNT3</i>         | REACTOME_M_PHASE                                  |
| 17:42929985  | <i>CRHR1_2</i>      | REACTOME_MRNA_SPLICING_MINOR_PATHWAY              |
| 6:30628082   | <i>TRIM40</i>       | REACTOME_MRNA_SPLICING                            |
| 6:30631063   | <i>TRIM40</i>       | REACTOME_MRNA_SPLICING                            |

|              |                     |                                                                              |
|--------------|---------------------|------------------------------------------------------------------------------|
| 6:30639369   | <i>TRIM40</i>       | REACTOME_MRNA_SPLICING                                                       |
| 11:82886475  | <i>DLG2</i>         | REACTOME_MRNA_SPLICING                                                       |
| 17:42929985  | <i>CRHR1_2</i>      | REACTOME_MRNA_SPLICING                                                       |
| 13:49914395  | <i>CAB39L</i>       | REACTOME_MTOR_SIGNALLING                                                     |
| 13:49927732  | <i>CAB39L</i>       | REACTOME_MTOR_SIGNALLING                                                     |
| 13:49948786  | <i>CAB39L</i>       | REACTOME_MTOR_SIGNALLING                                                     |
| 13:49960054  | <i>CAB39L</i>       | REACTOME_MTOR_SIGNALLING                                                     |
| 13:49977462  | <i>CAB39L</i>       | REACTOME_MTOR_SIGNALLING                                                     |
| 7:65425894   | <i>GS1-124K5.11</i> | REACTOME_MUCOPOLYSACCHARIDOSES                                               |
| 1:205884274  | <i>RAB29</i>        | REACTOME_MULTIFUNCTIONAL_ANION_EXCHANGERS                                    |
| 4:114424939  | <i>CAMK2D</i>       | REACTOME_MUSCLE_CONTRACTION                                                  |
| 17:7560294   | <i>V1NB1</i>        | REACTOME_MUSCLE_CONTRACTION                                                  |
| 6:32151443   | <i>HLA-DRB5</i>     | REACTOME_MYD88_CASCADE_INITIATED_ON_PLASMA_MEMBRANE                          |
| 10:103185542 | <i>GBF1</i>         | REACTOME_MYD88_CASCADE_INITIATED_ON_PLASMA_MEMBRANE                          |
| 10:103308244 | <i>GBF1</i>         | REACTOME_MYD88_CASCADE_INITIATED_ON_PLASMA_MEMBRANE                          |
| 16:50730088  | <i>CASC16</i>       | REACTOME_MYD88_CASCADE_INITIATED_ON_PLASMA_MEMBRANE                          |
| 16:50730446  | <i>CASC16</i>       | REACTOME_MYD88_CASCADE_INITIATED_ON_PLASMA_MEMBRANE                          |
| 16:50745926  | <i>CASC16</i>       | REACTOME_MYD88_CASCADE_INITIATED_ON_PLASMA_MEMBRANE                          |
| 8:21665306   | <i>BIN3</i>         | REACTOME_NCAM1_INTERACTIONS                                                  |
| 8:21668901   | <i>BIN3</i>         | REACTOME_NCAM1_INTERACTIONS                                                  |
| 6:112009427  | <i>FYN</i>          | REACTOME_NCAM_SIGNALING_FOR_NEURITE_OUT_GROWTH                               |
| 6:112056759  | <i>FYN</i>          | REACTOME_NCAM_SIGNALING_FOR_NEURITE_OUT_GROWTH                               |
| 6:112151452  | <i>FYN</i>          | REACTOME_NCAM_SIGNALING_FOR_NEURITE_OUT_GROWTH                               |
| 8:21665306   | <i>BIN3</i>         | REACTOME_NCAM_SIGNALING_FOR_NEURITE_OUT_GROWTH                               |
| 8:21668901   | <i>BIN3</i>         | REACTOME_NCAM_SIGNALING_FOR_NEURITE_OUT_GROWTH                               |
| 3:121324643  | <i>KPNA1</i>        | REACTOME_NEDDYLATION                                                         |
| 3:121340955  | <i>KPNA1</i>        | REACTOME_NEDDYLATION                                                         |
| 3:182656610  | <i>MCCC1</i>        | REACTOME_NEDDYLATION                                                         |
| 4:15608677   | <i>BST1</i>         | REACTOME_NEDDYLATION                                                         |
| 6:32814942   | <i>HLA-DRB5</i>     | REACTOME_NEDDYLATION                                                         |
| 7:66096028   | <i>GS1-124K5.11</i> | REACTOME_NEDDYLATION                                                         |
| 10:103185542 | <i>GBF1</i>         | REACTOME_NEDDYLATION                                                         |
| 10:103308244 | <i>GBF1</i>         | REACTOME_NEDDYLATION                                                         |
| 6:112009427  | <i>FYN</i>          | REACTOME_NEF_AND_SIGNAL_TRANSDUCTION                                         |
| 6:112056759  | <i>FYN</i>          | REACTOME_NEF_AND_SIGNAL_TRANSDUCTION                                         |
| 6:112151452  | <i>FYN</i>          | REACTOME_NEF_AND_SIGNAL_TRANSDUCTION                                         |
| 9:17579690   | <i>SH3GL2_2</i>     | REACTOME_NEGATIVE_REGULATION_OF_MET_ACTIVITY                                 |
| 9:17609302   | <i>SH3GL2_2</i>     | REACTOME_NEGATIVE_REGULATION_OF_MET_ACTIVITY                                 |
| 9:17627444   | <i>SH3GL2_2</i>     | REACTOME_NEGATIVE_REGULATION_OF_MET_ACTIVITY                                 |
| 9:17710876   | <i>SH3GL2_2</i>     | REACTOME_NEGATIVE_REGULATION_OF_MET_ACTIVITY                                 |
| 9:17732590   | <i>SH3GL2_2</i>     | REACTOME_NEGATIVE_REGULATION_OF_MET_ACTIVITY                                 |
| 9:17737514   | <i>SH3GL2_2</i>     | REACTOME_NEGATIVE_REGULATION_OF_MET_ACTIVITY                                 |
| 9:17758945   | <i>SH3GL2_2</i>     | REACTOME_NEGATIVE_REGULATION_OF_MET_ACTIVITY                                 |
| 4:114424939  | <i>CAMK2D</i>       | REACTOME_NEGATIVE_REGULATION_OF_NMDA_RECEPTOR_MEDIATED_NEURONAL_TRANSMISSION |
| 11:83188607  | <i>DLG2</i>         | REACTOME_NEGATIVE_REGULATION_OF_NMDA_RECEPTOR_MEDIATED_NEURONAL_TRANSMISSION |
| 11:83219006  | <i>DLG2</i>         | REACTOME_NEGATIVE_REGULATION_OF_NMDA_RECEPTOR_MEDIATED_NEURONAL_TRANSMISSION |
| 11:83538733  | <i>DLG2</i>         | REACTOME_NEGATIVE_REGULATION_OF_NMDA_RECEPTOR_MEDIATED_NEURONAL_TRANSMISSION |
| 11:83544472  | <i>DLG2</i>         | REACTOME_NEGATIVE_REGULATION_OF_NMDA_RECEPTOR_MEDIATED_NEURONAL_TRANSMISSION |
| 11:83656201  | <i>DLG2</i>         | REACTOME_NEGATIVE_REGULATION_OF_NMDA_RECEPTOR_MEDIATED_NEURONAL_TRANSMISSION |
| 11:83700228  | <i>DLG2</i>         | REACTOME_NEGATIVE_REGULATION_OF_NMDA_RECEPTOR_MEDIATED_NEURONAL_TRANSMISSION |
| 11:83762918  | <i>DLG2</i>         | REACTOME_NEGATIVE_REGULATION_OF_NMDA_RECEPTOR_MEDIATED_NEURONAL_TRANSMISSION |
| 11:83894247  | <i>DLG2</i>         | REACTOME_NEGATIVE_REGULATION_OF_NMDA_RECEPTOR_MEDIATED_NEURONAL_TRANSMISSION |
| 11:84021037  | <i>DLG2</i>         | REACTOME_NEGATIVE_REGULATION_OF_NMDA_RECEPTOR_MEDIATED_NEURONAL_TRANSMISSION |

|             |                 |                                                                                     |
|-------------|-----------------|-------------------------------------------------------------------------------------|
| 11:84324361 | <i>DLG2</i>     | REACTOME_NEGATIVE_REGULATION_OF_NMDA_RECEPTOR_MEDIATED_NEURONAL_TRANSMISSION        |
| 11:84373496 | <i>DLG2</i>     | REACTOME_NEGATIVE_REGULATION_OF_NMDA_RECEPTOR_MEDIATED_NEURONAL_TRANSMISSION        |
| 11:84403409 | <i>DLG2</i>     | REACTOME_NEGATIVE_REGULATION_OF_NMDA_RECEPTOR_MEDIATED_NEURONAL_TRANSMISSION        |
| 17:7101771  | <i>V1NB1</i>    | REACTOME_NEGATIVE_REGULATION_OF_NMDA_RECEPTOR_MEDIATED_NEURONAL_TRANSMISSION        |
| 6:32186193  | <i>HLA-DRB5</i> | REACTOME_NEGATIVE_REGULATION_OF_NOTCH4_SIGNALING                                    |
| 6:32814942  | <i>HLA-DRB5</i> | REACTOME_NEGATIVE_REGULATION_OF_NOTCH4_SIGNALING                                    |
| 17:7129974  | <i>V1NB1</i>    | REACTOME_NEGATIVE_REGULATION_OF_TCF_DEPENDENT_SIGNALING_BY_DVL_INTERACTING_PROTEINS |
| 6:112009427 | <i>FYN</i>      | REACTOME_NEGATIVE_REGULATION_OF_THE_PI3K_AKT_NETWORK                                |
| 6:112056759 | <i>FYN</i>      | REACTOME_NEGATIVE_REGULATION_OF_THE_PI3K_AKT_NETWORK                                |
| 6:112151452 | <i>FYN</i>      | REACTOME_NEGATIVE_REGULATION_OF_THE_PI3K_AKT_NETWORK                                |
| 6:112009427 | <i>FYN</i>      | REACTOME_NEPHRIN_FAMILY_INTERACTIONS                                                |
| 6:112056759 | <i>FYN</i>      | REACTOME_NEPHRIN_FAMILY_INTERACTIONS                                                |
| 6:112151452 | <i>FYN</i>      | REACTOME_NEPHRIN_FAMILY_INTERACTIONS                                                |
| 6:112009427 | <i>FYN</i>      | REACTOME_NETRIN_1_SIGNALING                                                         |
| 6:112056759 | <i>FYN</i>      | REACTOME_NETRIN_1_SIGNALING                                                         |
| 6:112151452 | <i>FYN</i>      | REACTOME_NETRIN_1_SIGNALING                                                         |
| 11:83188607 | <i>DLG2</i>     | REACTOME_NEUREXINS_AND_NEUROLIGINS                                                  |
| 11:83219006 | <i>DLG2</i>     | REACTOME_NEUREXINS_AND_NEUROLIGINS                                                  |
| 11:83538733 | <i>DLG2</i>     | REACTOME_NEUREXINS_AND_NEUROLIGINS                                                  |
| 11:83544472 | <i>DLG2</i>     | REACTOME_NEUREXINS_AND_NEUROLIGINS                                                  |
| 11:83656201 | <i>DLG2</i>     | REACTOME_NEUREXINS_AND_NEUROLIGINS                                                  |
| 11:83700228 | <i>DLG2</i>     | REACTOME_NEUREXINS_AND_NEUROLIGINS                                                  |
| 11:83762918 | <i>DLG2</i>     | REACTOME_NEUREXINS_AND_NEUROLIGINS                                                  |
| 11:83894247 | <i>DLG2</i>     | REACTOME_NEUREXINS_AND_NEUROLIGINS                                                  |
| 11:84021037 | <i>DLG2</i>     | REACTOME_NEUREXINS_AND_NEUROLIGINS                                                  |
| 11:84324361 | <i>DLG2</i>     | REACTOME_NEUREXINS_AND_NEUROLIGINS                                                  |
| 11:84373496 | <i>DLG2</i>     | REACTOME_NEUREXINS_AND_NEUROLIGINS                                                  |
| 11:84403409 | <i>DLG2</i>     | REACTOME_NEUREXINS_AND_NEUROLIGINS                                                  |
| 17:7101771  | <i>V1NB1</i>    | REACTOME_NEUREXINS_AND_NEUROLIGINS                                                  |
| 1:156059276 | <i>GBAP1</i>    | REACTOME_NEURODEGENERATIVE_DISEASES                                                 |
| 3:48199695  | <i>IP6K2</i>    | REACTOME_NEURODEGENERATIVE_DISEASES                                                 |
| 3:48214438  | <i>IP6K2</i>    | REACTOME_NEURODEGENERATIVE_DISEASES                                                 |
| 12:41147295 | <i>LRRK2_2</i>  | REACTOME_NEUROFASCIN_INTERACTIONS                                                   |
| 12:41251554 | <i>LRRK2_2</i>  | REACTOME_NEUROFASCIN_INTERACTIONS                                                   |
| 12:41407403 | <i>LRRK2_2</i>  | REACTOME_NEUROFASCIN_INTERACTIONS                                                   |
| 1:154804988 | <i>GBAP1</i>    | REACTOME_NEURONAL_SYSTEM                                                            |
| 2:18143082  | <i>KCNS3</i>    | REACTOME_NEURONAL_SYSTEM                                                            |
| 2:18176120  | <i>KCNS3</i>    | REACTOME_NEURONAL_SYSTEM                                                            |
| 2:18247777  | <i>KCNS3</i>    | REACTOME_NEURONAL_SYSTEM                                                            |
| 2:18296870  | <i>KCNS3</i>    | REACTOME_NEURONAL_SYSTEM                                                            |
| 2:18335515  | <i>KCNS3</i>    | REACTOME_NEURONAL_SYSTEM                                                            |
| 3:19312697  | <i>SATB1</i>    | REACTOME_NEURONAL_SYSTEM                                                            |
| 3:19334895  | <i>SATB1</i>    | REACTOME_NEURONAL_SYSTEM                                                            |
| 3:48835245  | <i>IP6K2</i>    | REACTOME_NEURONAL_SYSTEM                                                            |
| 3:123057397 | <i>KPNA1</i>    | REACTOME_NEURONAL_SYSTEM                                                            |
| 4:114424939 | <i>CAMK2D</i>   | REACTOME_NEURONAL_SYSTEM                                                            |
| 6:29579544  | <i>TRIM40</i>   | REACTOME_NEURONAL_SYSTEM                                                            |
| 11:83188607 | <i>DLG2</i>     | REACTOME_NEURONAL_SYSTEM                                                            |
| 11:83219006 | <i>DLG2</i>     | REACTOME_NEURONAL_SYSTEM                                                            |
| 11:83538733 | <i>DLG2</i>     | REACTOME_NEURONAL_SYSTEM                                                            |
| 11:83544472 | <i>DLG2</i>     | REACTOME_NEURONAL_SYSTEM                                                            |
| 11:83656201 | <i>DLG2</i>     | REACTOME_NEURONAL_SYSTEM                                                            |
| 11:83700228 | <i>DLG2</i>     | REACTOME_NEURONAL_SYSTEM                                                            |

|             |               |                                                                          |
|-------------|---------------|--------------------------------------------------------------------------|
| 11:83762918 | <i>DLG2</i>   | REACTOME_NEURONAL_SYSTEM                                                 |
| 11:83894247 | <i>DLG2</i>   | REACTOME_NEURONAL_SYSTEM                                                 |
| 11:84021037 | <i>DLG2</i>   | REACTOME_NEURONAL_SYSTEM                                                 |
| 11:84324361 | <i>DLG2</i>   | REACTOME_NEURONAL_SYSTEM                                                 |
| 11:84373496 | <i>DLG2</i>   | REACTOME_NEURONAL_SYSTEM                                                 |
| 11:84403409 | <i>DLG2</i>   | REACTOME_NEURONAL_SYSTEM                                                 |
| 17:7101771  | <i>V1NB1</i>  | REACTOME_NEURONAL_SYSTEM                                                 |
| 17:7832034  | <i>V1NB1</i>  | REACTOME_NEURONAL_SYSTEM                                                 |
| 17:43999203 | <i>WNT3</i>   | REACTOME_NEURONAL_SYSTEM                                                 |
| 17:44005297 | <i>WNT3</i>   | REACTOME_NEURONAL_SYSTEM                                                 |
| 17:44019712 | <i>WNT3</i>   | REACTOME_NEURONAL_SYSTEM                                                 |
| 17:44060492 | <i>WNT3</i>   | REACTOME_NEURONAL_SYSTEM                                                 |
| 17:44065263 | <i>WNT3</i>   | REACTOME_NEURONAL_SYSTEM                                                 |
| 17:44081178 | <i>WNT3</i>   | REACTOME_NEURONAL_SYSTEM                                                 |
| 17:44083297 | <i>WNT3</i>   | REACTOME_NEURONAL_SYSTEM                                                 |
| 17:44800946 | <i>WNT3</i>   | REACTOME_NEURONAL_SYSTEM                                                 |
| 17:44833217 | <i>WNT3</i>   | REACTOME_NEURONAL_SYSTEM                                                 |
| 21:39197323 | <i>DYRK1A</i> | REACTOME_NEURONAL_SYSTEM                                                 |
| 16:31004169 | <i>SETD1A</i> | REACTOME_NEUROTOXICITY_OF_CLOSTRIDIUM_TOXINS                             |
| 3:48835245  | <i>IP6K2</i>  | REACTOME_NEUROTRANSMITTER_RECEPTORS_AND_POSTSYNAPTIC_SIGNAL_TRANSMISSION |
| 3:123057397 | <i>KPNA1</i>  | REACTOME_NEUROTRANSMITTER_RECEPTORS_AND_POSTSYNAPTIC_SIGNAL_TRANSMISSION |
| 4:114424939 | <i>CAMK2D</i> | REACTOME_NEUROTRANSMITTER_RECEPTORS_AND_POSTSYNAPTIC_SIGNAL_TRANSMISSION |
| 6:29579544  | <i>TRIM40</i> | REACTOME_NEUROTRANSMITTER_RECEPTORS_AND_POSTSYNAPTIC_SIGNAL_TRANSMISSION |
| 11:83188607 | <i>DLG2</i>   | REACTOME_NEUROTRANSMITTER_RECEPTORS_AND_POSTSYNAPTIC_SIGNAL_TRANSMISSION |
| 11:83219006 | <i>DLG2</i>   | REACTOME_NEUROTRANSMITTER_RECEPTORS_AND_POSTSYNAPTIC_SIGNAL_TRANSMISSION |
| 11:83538733 | <i>DLG2</i>   | REACTOME_NEUROTRANSMITTER_RECEPTORS_AND_POSTSYNAPTIC_SIGNAL_TRANSMISSION |
| 11:83544472 | <i>DLG2</i>   | REACTOME_NEUROTRANSMITTER_RECEPTORS_AND_POSTSYNAPTIC_SIGNAL_TRANSMISSION |
| 11:83656201 | <i>DLG2</i>   | REACTOME_NEUROTRANSMITTER_RECEPTORS_AND_POSTSYNAPTIC_SIGNAL_TRANSMISSION |
| 11:83700228 | <i>DLG2</i>   | REACTOME_NEUROTRANSMITTER_RECEPTORS_AND_POSTSYNAPTIC_SIGNAL_TRANSMISSION |
| 11:83762918 | <i>DLG2</i>   | REACTOME_NEUROTRANSMITTER_RECEPTORS_AND_POSTSYNAPTIC_SIGNAL_TRANSMISSION |
| 11:83894247 | <i>DLG2</i>   | REACTOME_NEUROTRANSMITTER_RECEPTORS_AND_POSTSYNAPTIC_SIGNAL_TRANSMISSION |
| 11:84021037 | <i>DLG2</i>   | REACTOME_NEUROTRANSMITTER_RECEPTORS_AND_POSTSYNAPTIC_SIGNAL_TRANSMISSION |
| 11:84324361 | <i>DLG2</i>   | REACTOME_NEUROTRANSMITTER_RECEPTORS_AND_POSTSYNAPTIC_SIGNAL_TRANSMISSION |
| 11:84373496 | <i>DLG2</i>   | REACTOME_NEUROTRANSMITTER_RECEPTORS_AND_POSTSYNAPTIC_SIGNAL_TRANSMISSION |
| 11:84403409 | <i>DLG2</i>   | REACTOME_NEUROTRANSMITTER_RECEPTORS_AND_POSTSYNAPTIC_SIGNAL_TRANSMISSION |
| 17:7101771  | <i>V1NB1</i>  | REACTOME_NEUROTRANSMITTER_RECEPTORS_AND_POSTSYNAPTIC_SIGNAL_TRANSMISSION |
| 17:43999203 | <i>WNT3</i>   | REACTOME_NEUROTRANSMITTER_RECEPTORS_AND_POSTSYNAPTIC_SIGNAL_TRANSMISSION |
| 17:44005297 | <i>WNT3</i>   | REACTOME_NEUROTRANSMITTER_RECEPTORS_AND_POSTSYNAPTIC_SIGNAL_TRANSMISSION |
| 17:44019712 | <i>WNT3</i>   | REACTOME_NEUROTRANSMITTER_RECEPTORS_AND_POSTSYNAPTIC_SIGNAL_TRANSMISSION |
| 17:44060492 | <i>WNT3</i>   | REACTOME_NEUROTRANSMITTER_RECEPTORS_AND_POSTSYNAPTIC_SIGNAL_TRANSMISSION |
| 17:44065263 | <i>WNT3</i>   | REACTOME_NEUROTRANSMITTER_RECEPTORS_AND_POSTSYNAPTIC_SIGNAL_TRANSMISSION |
| 17:44081178 | <i>WNT3</i>   | REACTOME_NEUROTRANSMITTER_RECEPTORS_AND_POSTSYNAPTIC_SIGNAL_TRANSMISSION |
| 17:44083297 | <i>WNT3</i>   | REACTOME_NEUROTRANSMITTER_RECEPTORS_AND_POSTSYNAPTIC_SIGNAL_TRANSMISSION |
| 17:44800946 | <i>WNT3</i>   | REACTOME_NEUROTRANSMITTER_RECEPTORS_AND_POSTSYNAPTIC_SIGNAL_TRANSMISSION |
| 17:44833217 | <i>WNT3</i>   | REACTOME_NEUROTRANSMITTER_RECEPTORS_AND_POSTSYNAPTIC_SIGNAL_TRANSMISSION |
| 21:39197323 | <i>DYRK1A</i> | REACTOME_NEUROTRANSMITTER_RECEPTORS_AND_POSTSYNAPTIC_SIGNAL_TRANSMISSION |
| 1:226052830 | <i>ITPKB</i>  | REACTOME_NEUTROPHIL_DEGRANULATION                                        |
| 3:49406095  | <i>IP6K2</i>  | REACTOME_NEUTROPHIL_DEGRANULATION                                        |
| 3:49424231  | <i>IP6K2</i>  | REACTOME_NEUTROPHIL_DEGRANULATION                                        |
| 3:49450137  | <i>IP6K2</i>  | REACTOME_NEUTROPHIL_DEGRANULATION                                        |
| 4:15709252  | <i>BST1</i>   | REACTOME_NEUTROPHIL_DEGRANULATION                                        |
| 4:15713608  | <i>BST1</i>   | REACTOME_NEUTROPHIL_DEGRANULATION                                        |
| 4:15724372  | <i>BST1</i>   | REACTOME_NEUTROPHIL_DEGRANULATION                                        |

|             |                     |                                                                      |
|-------------|---------------------|----------------------------------------------------------------------|
| 4:15737882  | <i>BST1</i>         | REACTOME_NEUTROPHIL_DEGRANULATION                                    |
| 6:133025715 | <i>RPS12</i>        | REACTOME_NEUTROPHIL_DEGRANULATION                                    |
| 6:133028870 | <i>RPS12</i>        | REACTOME_NEUTROPHIL_DEGRANULATION                                    |
| 6:133034076 | <i>RPS12</i>        | REACTOME_NEUTROPHIL_DEGRANULATION                                    |
| 7:65425894  | <i>GS1-124K5.11</i> | REACTOME_NEUTROPHIL_DEGRANULATION                                    |
| 8:11712443  | <i>CTSB</i>         | REACTOME_NEUTROPHIL_DEGRANULATION                                    |
| 9:33791164  | <i>UBAP2</i>        | REACTOME_NEUTROPHIL_DEGRANULATION                                    |
| 11:10392432 | <i>RNF141</i>       | REACTOME_NEUTROPHIL_DEGRANULATION                                    |
| 11:10487997 | <i>RNF141</i>       | REACTOME_NEUTROPHIL_DEGRANULATION                                    |
| 11:82582134 | <i>DLG2</i>         | REACTOME_NEUTROPHIL_DEGRANULATION                                    |
| 11:82648357 | <i>DLG2</i>         | REACTOME_NEUTROPHIL_DEGRANULATION                                    |
| 12:45755099 | <i>SCAF11</i>       | REACTOME_NEUTROPHIL_DEGRANULATION                                    |
| 16:30510571 | <i>SETD1A</i>       | REACTOME_NEUTROPHIL_DEGRANULATION                                    |
| 16:30516492 | <i>SETD1A</i>       | REACTOME_NEUTROPHIL_DEGRANULATION                                    |
| 16:30520856 | <i>SETD1A</i>       | REACTOME_NEUTROPHIL_DEGRANULATION                                    |
| 16:31370452 | <i>SETD1A</i>       | REACTOME_NEUTROPHIL_DEGRANULATION                                    |
| 17:39883520 | <i>RETREG3</i>      | REACTOME_NEUTROPHIL_DEGRANULATION                                    |
| 17:42423844 | <i>FAM171A2</i>     | REACTOME_NEUTROPHIL_DEGRANULATION                                    |
| 2:134977261 | <i>TMEM163</i>      | REACTOME_N_GLYCAN_ANTENNAE_ELONGATION_IN_THE_MEDIAL_TRANS_GOLGI      |
| 2:135194840 | <i>TMEM163</i>      | REACTOME_N_GLYCAN_ANTENNAE_ELONGATION_IN_THE_MEDIAL_TRANS_GOLGI      |
| 2:135202455 | <i>TMEM163</i>      | REACTOME_N_GLYCAN_ANTENNAE_ELONGATION_IN_THE_MEDIAL_TRANS_GOLGI      |
| 2:134977261 | <i>TMEM163</i>      | REACTOME_N_GLYCAN_ANTENNAE_ELONGATION                                |
| 2:135194840 | <i>TMEM163</i>      | REACTOME_N_GLYCAN_ANTENNAE_ELONGATION                                |
| 2:135202455 | <i>TMEM163</i>      | REACTOME_N_GLYCAN_ANTENNAE_ELONGATION                                |
| 6:32151443  | <i>HLA-DRB5</i>     | REACTOME_N_GLYCAN_TRIMMING_IN_THE_ER_AND_CALNEXIN_CALRETICULIN_CYCLE |
| 3:122259640 | <i>KPNA1</i>        | REACTOME_NICOTINAMIDE_SALVAGING                                      |
| 3:122259640 | <i>KPNA1</i>        | REACTOME_NICOTINATE_METABOLISM                                       |
| 4:15709252  | <i>BST1</i>         | REACTOME_NICOTINATE_METABOLISM                                       |
| 4:15713608  | <i>BST1</i>         | REACTOME_NICOTINATE_METABOLISM                                       |
| 4:15724372  | <i>BST1</i>         | REACTOME_NICOTINATE_METABOLISM                                       |
| 4:15737882  | <i>BST1</i>         | REACTOME_NICOTINATE_METABOLISM                                       |
| 4:15789288  | <i>BST1</i>         | REACTOME_NICOTINATE_METABOLISM                                       |
| 4:15816670  | <i>BST1</i>         | REACTOME_NICOTINATE_METABOLISM                                       |
| 4:15829612  | <i>BST1</i>         | REACTOME_NICOTINATE_METABOLISM                                       |
| 11:10647977 | <i>RNF141</i>       | REACTOME_NITRIC_OXIDE_STIMULATES_GUANYLATE_CYCLASE                   |
| 11:10648481 | <i>RNF141</i>       | REACTOME_NITRIC_OXIDE_STIMULATES_GUANYLATE_CYCLASE                   |
| 11:10660840 | <i>RNF141</i>       | REACTOME_NITRIC_OXIDE_STIMULATES_GUANYLATE_CYCLASE                   |
| 16:50730088 | <i>CASC16</i>       | REACTOME_NOD1_2_SIGNALING_PATHWAY                                    |
| 16:50730446 | <i>CASC16</i>       | REACTOME_NOD1_2_SIGNALING_PATHWAY                                    |
| 16:50745926 | <i>CASC16</i>       | REACTOME_NOD1_2_SIGNALING_PATHWAY                                    |
| 1:227067656 | <i>ITPKB</i>        | REACTOME_NONCANONICAL_ACTIVATION_OF_NOTCH3                           |
| 3:49162284  | <i>IP6K2</i>        | REACTOME_NON_INTEGRIN_MEMBRANE_ECM_INTERACTIONS                      |
| 3:49162583  | <i>IP6K2</i>        | REACTOME_NON_INTEGRIN_MEMBRANE_ECM_INTERACTIONS                      |
| 3:49561208  | <i>IP6K2</i>        | REACTOME_NON_INTEGRIN_MEMBRANE_ECM_INTERACTIONS                      |
| 6:30850582  | <i>TRIM40</i>       | REACTOME_NON_INTEGRIN_MEMBRANE_ECM_INTERACTIONS                      |
| 6:33153528  | <i>HLA-DRB5</i>     | REACTOME_NON_INTEGRIN_MEMBRANE_ECM_INTERACTIONS                      |
| 6:112561154 | <i>FYN</i>          | REACTOME_NON_INTEGRIN_MEMBRANE_ECM_INTERACTIONS                      |
| 19:3022354  | <i>SPPL2B</i>       | REACTOME_NOTCH1_INTRACELLULAR_DOMAIN_REGULATES_TRANSCRIPTION         |
| 19:3036350  | <i>SPPL2B</i>       | REACTOME_NOTCH1_INTRACELLULAR_DOMAIN_REGULATES_TRANSCRIPTION         |
| 1:227067656 | <i>ITPKB</i>        | REACTOME_NOTCH2_ACTIVATION_AND_TRANSMISSION_OF_SIGNAL_TO_THE_NUCLEUS |
| 12:41147295 | <i>LRRK2_2</i>      | REACTOME_NOTCH2_ACTIVATION_AND_TRANSMISSION_OF_SIGNAL_TO_THE_NUCLEUS |
| 12:41251554 | <i>LRRK2_2</i>      | REACTOME_NOTCH2_ACTIVATION_AND_TRANSMISSION_OF_SIGNAL_TO_THE_NUCLEUS |
| 12:41407403 | <i>LRRK2_2</i>      | REACTOME_NOTCH2_ACTIVATION_AND_TRANSMISSION_OF_SIGNAL_TO_THE_NUCLEUS |

|              |                 |                                                                                                  |
|--------------|-----------------|--------------------------------------------------------------------------------------------------|
| 1:227067656  | <i>ITPKB</i>    | REACTOME_NOTCH3_ACTIVATION_AND_TRANSMISSION_OF_SIGNAL_TO_THE_NUCLEUS                             |
| 1:227067656  | <i>ITPKB</i>    | REACTOME_NOTCH4_ACTIVATION_AND_TRANSMISSION_OF_SIGNAL_TO_THE_NUCLEUS                             |
| 6:32186193   | <i>HLA-DRB5</i> | REACTOME_NOTCH4_ACTIVATION_AND_TRANSMISSION_OF_SIGNAL_TO_THE_NUCLEUS                             |
| 6:32186193   | <i>HLA-DRB5</i> | REACTOME_NOTCH4_INTRACELLULAR_DOMAIN_REGULATES_TRANSCRIPTION                                     |
| 6:32186193   | <i>HLA-DRB5</i> | REACTOME_NOTCH_HLH_TRANSCRIPTION_PATHWAY                                                         |
| 1:155975202  | <i>GBAP1</i>    | REACTOME_NRAGE_SIGNALS_DEATH_THROUGH_JNK                                                         |
| 17:7101771   | <i>V1NB1</i>    | REACTOME_NRCAM_INTERACTIONS                                                                      |
| 1:227067656  | <i>ITPKB</i>    | REACTOME_NRIF_SIGNALS_CELL_DEATH_FROM_THE_NUCLEUS                                                |
| 6:112009427  | <i>FYN</i>      | REACTOME_NTRK2_ACTIVATES_RAC1                                                                    |
| 6:112056759  | <i>FYN</i>      | REACTOME_NTRK2_ACTIVATES_RAC1                                                                    |
| 6:112151452  | <i>FYN</i>      | REACTOME_NTRK2_ACTIVATES_RAC1                                                                    |
| 1:156059276  | <i>GBAP1</i>    | REACTOME_NUCLEAR_ENVELOPE_BREAKDOWN                                                              |
| 1:156059276  | <i>GBAP1</i>    | REACTOME_NUCLEAR_ENVELOPE_REASSEMBLY                                                             |
| 15:61293467  | <i>VPS13C</i>   | REACTOME_NUCLEAR_RECEPTOR_TRANSCRIPTION_PATHWAY                                                  |
| 1:227067656  | <i>ITPKB</i>    | REACTOME_NUCLEAR_SIGNALING_BY_ERBB4                                                              |
| 10:104847713 | <i>GBF1</i>     | REACTOME_NUCLEOBASE_CATABOLISM                                                                   |
| 10:104861736 | <i>GBF1</i>     | REACTOME_NUCLEOBASE_CATABOLISM                                                                   |
| 10:104926485 | <i>GBF1</i>     | REACTOME_NUCLEOBASE_CATABOLISM                                                                   |
| 10:104929716 | <i>GBF1</i>     | REACTOME_NUCLEOBASE_CATABOLISM                                                                   |
| 14:74477206  | <i>RPS6KL1</i>  | REACTOME_NUCLEOBASE_CATABOLISM                                                                   |
| 16:50730088  | <i>CASC16</i>   | REACTOME_NUCLEOTIDE_BINDING_DOMAIN_LEUCINE_RICH_REPEAT_CONTAINING_RECEPTOR_NLR_SIGNALING_PATHWAY |
| 16:50730446  | <i>CASC16</i>   | REACTOME_NUCLEOTIDE_BINDING_DOMAIN_LEUCINE_RICH_REPEAT_CONTAINING_RECEPTOR_NLR_SIGNALING_PATHWAY |
| 16:50745926  | <i>CASC16</i>   | REACTOME_NUCLEOTIDE_BINDING_DOMAIN_LEUCINE_RICH_REPEAT_CONTAINING_RECEPTOR_NLR_SIGNALING_PATHWAY |
| 12:133206648 | <i>FBRSL1</i>   | REACTOME_NUCLEOTIDE_EXCISION_REPAIR                                                              |
| 12:133223685 | <i>FBRSL1</i>   | REACTOME_NUCLEOTIDE_EXCISION_REPAIR                                                              |
| 12:133225045 | <i>FBRSL1</i>   | REACTOME_NUCLEOTIDE_EXCISION_REPAIR                                                              |
| 3:151090424  | <i>MED12L</i>   | REACTOME_NUCLEOTIDE_LIKE_PURINERGIC_RECEPTORS                                                    |
| 3:151099733  | <i>MED12L</i>   | REACTOME_NUCLEOTIDE_LIKE_PURINERGIC_RECEPTORS                                                    |
| 11:10392432  | <i>RNF141</i>   | REACTOME_NUCLEOTIDE_SALVAGE                                                                      |
| 11:10487997  | <i>RNF141</i>   | REACTOME_NUCLEOTIDE_SALVAGE                                                                      |
| 17:76177567  | <i>DNAH17</i>   | REACTOME_NUCLEOTIDE_SALVAGE                                                                      |
| 17:42338993  | <i>FAM171A2</i> | REACTOME_O2_CO2_EXCHANGE_IN_ERYTHROCYTES                                                         |
| 3:122645304  | <i>KPNA1</i>    | REACTOME_O_GLYCOSYLATION_OF_TSR_DOMAIN_CONTAINING_PROTEINS                                       |
| 9:18650547   | <i>SH3GL2_2</i> | REACTOME_O_GLYCOSYLATION_OF_TSR_DOMAIN_CONTAINING_PROTEINS                                       |
| 6:29351969   | <i>TRIM40</i>   | REACTOME_OLFACTORY_SIGNALING_PATHWAY                                                             |
| 6:29373213   | <i>TRIM40</i>   | REACTOME_OLFACTORY_SIGNALING_PATHWAY                                                             |
| 6:29407378   | <i>TRIM40</i>   | REACTOME_OLFACTORY_SIGNALING_PATHWAY                                                             |
| 6:29412222   | <i>TRIM40</i>   | REACTOME_OLFACTORY_SIGNALING_PATHWAY                                                             |
| 3:182976382  | <i>MCCC1</i>    | REACTOME_O_LINKED_GLYCOSYLATION_OF_MUCINS                                                        |
| 3:182979912  | <i>MCCC1</i>    | REACTOME_O_LINKED_GLYCOSYLATION_OF_MUCINS                                                        |
| 3:183005320  | <i>MCCC1</i>    | REACTOME_O_LINKED_GLYCOSYLATION_OF_MUCINS                                                        |
| 12:132687184 | <i>FBRSL1</i>   | REACTOME_O_LINKED_GLYCOSYLATION_OF_MUCINS                                                        |
| 3:49561208   | <i>IP6K2</i>    | REACTOME_O_LINKED_GLYCOSYLATION                                                                  |
| 3:122645304  | <i>KPNA1</i>    | REACTOME_O_LINKED_GLYCOSYLATION                                                                  |
| 3:182976382  | <i>MCCC1</i>    | REACTOME_O_LINKED_GLYCOSYLATION                                                                  |
| 3:182979912  | <i>MCCC1</i>    | REACTOME_O_LINKED_GLYCOSYLATION                                                                  |
| 3:183005320  | <i>MCCC1</i>    | REACTOME_O_LINKED_GLYCOSYLATION                                                                  |
| 9:18650547   | <i>SH3GL2_2</i> | REACTOME_O_LINKED_GLYCOSYLATION                                                                  |
| 12:132687184 | <i>FBRSL1</i>   | REACTOME_O_LINKED_GLYCOSYLATION                                                                  |
| 17:7578671   | <i>V1NB1</i>    | REACTOME_ONCOGENE_INDUCED_SENESCENCE                                                             |
| 1:156059276  | <i>GBAP1</i>    | REACTOME_ONCOGENIC_MAPK_SIGNALING                                                                |
| 4:114424939  | <i>CAMK2D</i>   | REACTOME_ONCOGENIC_MAPK_SIGNALING                                                                |
| 3:48835245   | <i>IP6K2</i>    | REACTOME_OPIOID_SIGNALLING                                                                       |

|              |                 |                                               |
|--------------|-----------------|-----------------------------------------------|
| 3:123057397  | <i>KPNA1</i>    | REACTOME_OPIOID_SIGNALLING                    |
| 4:114424939  | <i>CAMK2D</i>   | REACTOME_OPIOID_SIGNALLING                    |
| 5:59236972   | <i>ELOVL7</i>   | REACTOME_OPIOID_SIGNALLING                    |
| 5:59665659   | <i>ELOVL7</i>   | REACTOME_OPIOID_SIGNALLING                    |
| 5:59705316   | <i>ELOVL7</i>   | REACTOME_OPIOID_SIGNALLING                    |
| 5:59736085   | <i>ELOVL7</i>   | REACTOME_OPIOID_SIGNALLING                    |
| 6:32814942   | <i>HLA-DRB5</i> | REACTOME_ORC1_REMOVAL_FROM_CHROMATIN          |
| 20:5934513   | <i>CRLS1</i>    | REACTOME_ORC1_REMOVAL_FROM_CHROMATIN          |
| 20:5968737   | <i>CRLS1</i>    | REACTOME_ORC1_REMOVAL_FROM_CHROMATIN          |
| 20:5968964   | <i>CRLS1</i>    | REACTOME_ORC1_REMOVAL_FROM_CHROMATIN          |
| 1:155181232  | <i>GBAP1</i>    | REACTOME_ORGANELLE_BIOGENESIS_AND_MAINTENANCE |
| 3:121553904  | <i>KPNA1</i>    | REACTOME_ORGANELLE_BIOGENESIS_AND_MAINTENANCE |
| 4:15492268   | <i>BST1</i>     | REACTOME_ORGANELLE_BIOGENESIS_AND_MAINTENANCE |
| 4:15547513   | <i>BST1</i>     | REACTOME_ORGANELLE_BIOGENESIS_AND_MAINTENANCE |
| 4:15554219   | <i>BST1</i>     | REACTOME_ORGANELLE_BIOGENESIS_AND_MAINTENANCE |
| 6:30601232   | <i>TRIM40</i>   | REACTOME_ORGANELLE_BIOGENESIS_AND_MAINTENANCE |
| 8:131153067  | <i>FAM49B</i>   | REACTOME_ORGANELLE_BIOGENESIS_AND_MAINTENANCE |
| 8:131190319  | <i>FAM49B</i>   | REACTOME_ORGANELLE_BIOGENESIS_AND_MAINTENANCE |
| 8:131427864  | <i>FAM49B</i>   | REACTOME_ORGANELLE_BIOGENESIS_AND_MAINTENANCE |
| 10:104005410 | <i>GBF1</i>     | REACTOME_ORGANELLE_BIOGENESIS_AND_MAINTENANCE |
| 10:104034550 | <i>GBF1</i>     | REACTOME_ORGANELLE_BIOGENESIS_AND_MAINTENANCE |
| 10:104258303 | <i>GBF1</i>     | REACTOME_ORGANELLE_BIOGENESIS_AND_MAINTENANCE |
| 10:104443875 | <i>GBF1</i>     | REACTOME_ORGANELLE_BIOGENESIS_AND_MAINTENANCE |
| 10:104452818 | <i>GBF1</i>     | REACTOME_ORGANELLE_BIOGENESIS_AND_MAINTENANCE |
| 4:114424939  | <i>CAMK2D</i>   | REACTOME_OTHER_INTERLEUKIN_SIGNALING          |
| 6:32814942   | <i>HLA-DRB5</i> | REACTOME_OTHER_INTERLEUKIN_SIGNALING          |
| 6:112009427  | <i>FYN</i>      | REACTOME_OTHER_INTERLEUKIN_SIGNALING          |
| 6:112056759  | <i>FYN</i>      | REACTOME_OTHER_INTERLEUKIN_SIGNALING          |
| 6:112151452  | <i>FYN</i>      | REACTOME_OTHER_INTERLEUKIN_SIGNALING          |
| 8:21665306   | <i>BIN3</i>     | REACTOME_OTHER_INTERLEUKIN_SIGNALING          |
| 8:21668901   | <i>BIN3</i>     | REACTOME_OTHER_INTERLEUKIN_SIGNALING          |
| 11:83188607  | <i>DLG2</i>     | REACTOME_OTHER_INTERLEUKIN_SIGNALING          |
| 11:83219006  | <i>DLG2</i>     | REACTOME_OTHER_INTERLEUKIN_SIGNALING          |
| 11:83538733  | <i>DLG2</i>     | REACTOME_OTHER_INTERLEUKIN_SIGNALING          |
| 11:83544472  | <i>DLG2</i>     | REACTOME_OTHER_INTERLEUKIN_SIGNALING          |
| 11:83656201  | <i>DLG2</i>     | REACTOME_OTHER_INTERLEUKIN_SIGNALING          |
| 11:83700228  | <i>DLG2</i>     | REACTOME_OTHER_INTERLEUKIN_SIGNALING          |
| 11:83762918  | <i>DLG2</i>     | REACTOME_OTHER_INTERLEUKIN_SIGNALING          |
| 11:83894247  | <i>DLG2</i>     | REACTOME_OTHER_INTERLEUKIN_SIGNALING          |
| 11:84021037  | <i>DLG2</i>     | REACTOME_OTHER_INTERLEUKIN_SIGNALING          |
| 11:84324361  | <i>DLG2</i>     | REACTOME_OTHER_INTERLEUKIN_SIGNALING          |
| 11:84373496  | <i>DLG2</i>     | REACTOME_OTHER_INTERLEUKIN_SIGNALING          |
| 11:84403409  | <i>DLG2</i>     | REACTOME_OTHER_INTERLEUKIN_SIGNALING          |
| 17:7101771   | <i>V1NB1</i>    | REACTOME_OTHER_INTERLEUKIN_SIGNALING          |
| 17:40392358  | <i>RETREG3</i>  | REACTOME_OTHER_INTERLEUKIN_SIGNALING          |
| 3:49406095   | <i>IP6K2</i>    | REACTOME_OVARIAN_TUMOR_DOMAIN_PROTEASES       |
| 3:49424231   | <i>IP6K2</i>    | REACTOME_OVARIAN_TUMOR_DOMAIN_PROTEASES       |
| 3:49450137   | <i>IP6K2</i>    | REACTOME_OVARIAN_TUMOR_DOMAIN_PROTEASES       |
| 16:50730088  | <i>CASC16</i>   | REACTOME_OVARIAN_TUMOR_DOMAIN_PROTEASES       |
| 16:50730446  | <i>CASC16</i>   | REACTOME_OVARIAN_TUMOR_DOMAIN_PROTEASES       |
| 16:50745926  | <i>CASC16</i>   | REACTOME_OVARIAN_TUMOR_DOMAIN_PROTEASES       |
| 17:7578671   | <i>V1NB1</i>    | REACTOME_OVARIAN_TUMOR_DOMAIN_PROTEASES       |
| 2:102357447  | <i>MAP4K4</i>   | REACTOME_OXIDATIVE_STRESS_INDUCED_SENESCENCE  |

|              |              |                                                         |
|--------------|--------------|---------------------------------------------------------|
| 2:102413116  | MAP4K4       | REACTOME_OXIDATIVE_STRESS_INDUCED_SENESCENCE            |
| 17:7578671   | V1NB1        | REACTOME_OXIDATIVE_STRESS_INDUCED_SENESCENCE            |
| 3:151090424  | MED12L       | REACTOME_P2Y_RECEPTORS                                  |
| 3:151099733  | MED12L       | REACTOME_P2Y_RECEPTORS                                  |
| 1:155975202  | GBAP1        | REACTOME_P75_NTR_RECEPTOR_MEDIATED_SIGNALLING           |
| 1:227067656  | ITPKB        | REACTOME_P75_NTR_RECEPTOR_MEDIATED_SIGNALLING           |
| 3:49406095   | IP6K2        | REACTOME_P75_NTR_RECEPTOR_MEDIATED_SIGNALLING           |
| 3:49424231   | IP6K2        | REACTOME_P75_NTR_RECEPTOR_MEDIATED_SIGNALLING           |
| 3:49450137   | IP6K2        | REACTOME_P75_NTR_RECEPTOR_MEDIATED_SIGNALLING           |
| 3:49406095   | IP6K2        | REACTOME_P75NTR_REGULATES_AXONOGENESIS                  |
| 3:49424231   | IP6K2        | REACTOME_P75NTR_REGULATES_AXONOGENESIS                  |
| 3:49450137   | IP6K2        | REACTOME_P75NTR_REGULATES_AXONOGENESIS                  |
| 12:133206648 | FBRSL1       | REACTOME_PCNA_DEPENDENT_LONG_PATCH_BASE_EXCISION_REPAIR |
| 12:133223685 | FBRSL1       | REACTOME_PCNA_DEPENDENT_LONG_PATCH_BASE_EXCISION_REPAIR |
| 12:133225045 | FBRSL1       | REACTOME_PCNA_DEPENDENT_LONG_PATCH_BASE_EXCISION_REPAIR |
| 3:49406095   | IP6K2        | REACTOME_PCP_CE_PATHWAY                                 |
| 3:49424231   | IP6K2        | REACTOME_PCP_CE_PATHWAY                                 |
| 3:49450137   | IP6K2        | REACTOME_PCP_CE_PATHWAY                                 |
| 6:32814942   | HLA-DRB5     | REACTOME_PCP_CE_PATHWAY                                 |
| 17:7129974   | V1NB1        | REACTOME_PCP_CE_PATHWAY                                 |
| 6:32602372   | HLA-DRB5     | REACTOME_PD_1_SIGNALING                                 |
| 6:112009427  | FYN          | REACTOME_PECAM1_INTERACTIONS                            |
| 6:112056759  | FYN          | REACTOME_PECAM1_INTERACTIONS                            |
| 6:112151452  | FYN          | REACTOME_PECAM1_INTERACTIONS                            |
| 1:161875645  | FCGR2A       | REACTOME_PERK_REGULATES_GENE_EXPRESSION                 |
| 1:161930954  | FCGR2A       | REACTOME_PERK_REGULATES_GENE_EXPRESSION                 |
| 4:114424939  | CAMK2D       | REACTOME_PHASE_0_RAPID_DEPOLARISATION                   |
| 7:65705034   | GS1-124K5.11 | REACTOME_PHASE_II_CONJUGATION_OF_COMPOUNDS              |
| 10:104635620 | GBF1         | REACTOME_PHASE_II_CONJUGATION_OF_COMPOUNDS              |
| 14:74477206  | RPS6KL1      | REACTOME_PHOSPHATE_BOND_HYDROLYSIS_BY_NTPDASE_PROTEINS  |
| 2:96858914   | KCNIP3       | REACTOME_PHOSPHOLIPID_METABOLISM                        |
| 6:31846234   | HLA-DRB5     | REACTOME_PHOSPHOLIPID_METABOLISM                        |
| 10:121505277 | INPP5F       | REACTOME_PHOSPHOLIPID_METABOLISM                        |
| 10:121538407 | INPP5F       | REACTOME_PHOSPHOLIPID_METABOLISM                        |
| 12:123561638 | HIP1R        | REACTOME_PHOSPHOLIPID_METABOLISM                        |
| 12:123585705 | HIP1R        | REACTOME_PHOSPHOLIPID_METABOLISM                        |
| 20:6011934   | CRLS1        | REACTOME_PHOSPHOLIPID_METABOLISM                        |
| 6:32602372   | HLA-DRB5     | REACTOME_PHOSPHORYLATION_OF_CD3_AND_TCR_ZETA_CHAINS     |
| 17:45215865  | WNT3         | REACTOME_PHOSPHORYLATION_OF_THE_APC_C                   |
| 17:45244822  | WNT3         | REACTOME_PHOSPHORYLATION_OF_THE_APC_C                   |
| 3:49406095   | IP6K2        | REACTOME_PI3K_AKT_ACTIVATION                            |
| 3:49424231   | IP6K2        | REACTOME_PI3K_AKT_ACTIVATION                            |
| 3:49450137   | IP6K2        | REACTOME_PI3K_AKT_ACTIVATION                            |
| 6:112009427  | FYN          | REACTOME_PI3K_AKT_SIGNALING_IN_CANCER                   |
| 6:112056759  | FYN          | REACTOME_PI3K_AKT_SIGNALING_IN_CANCER                   |
| 6:112151452  | FYN          | REACTOME_PI3K_AKT_SIGNALING_IN_CANCER                   |
| 17:7578671   | V1NB1        | REACTOME_PI5P_REGULATES_TP53_ACETYLATION                |
| 10:121505277 | INPP5F       | REACTOME_PI_METABOLISM                                  |
| 10:121538407 | INPP5F       | REACTOME_PI_METABOLISM                                  |
| 3:48835245   | IP6K2        | REACTOME_PKA_ACTIVATION_IN_GLUCAGON_SIGNALLING          |
| 3:123057397  | KPNA1        | REACTOME_PKA_ACTIVATION_IN_GLUCAGON_SIGNALLING          |
| 3:48835245   | IP6K2        | REACTOME_PKA_MEDIATED_PHOSPHORYLATION_OF_CREB           |
| 3:123057397  | KPNA1        | REACTOME_PKA_MEDIATED_PHOSPHORYLATION_OF_CREB           |

|             |                     |                                                                              |
|-------------|---------------------|------------------------------------------------------------------------------|
| 1:155359992 | <i>GBAP1</i>        | REACTOME_PKMTS_METHYLATE_HISTONE_LYSINES                                     |
| 6:31862876  | <i>HLA-DRB5</i>     | REACTOME_PKMTS_METHYLATE_HISTONE_LYSINES                                     |
| 19:2172266  | <i>SPPL2B</i>       | REACTOME_PKMTS_METHYLATE_HISTONE_LYSINES                                     |
| 3:49406095  | <i>IP6K2</i>        | REACTOME_PLATELET_ACTIVATION_SIGNALING_AND_AGGREGATION                       |
| 3:49424231  | <i>IP6K2</i>        | REACTOME_PLATELET_ACTIVATION_SIGNALING_AND_AGGREGATION                       |
| 3:49450137  | <i>IP6K2</i>        | REACTOME_PLATELET_ACTIVATION_SIGNALING_AND_AGGREGATION                       |
| 3:151090424 | <i>MED12L</i>       | REACTOME_PLATELET_ACTIVATION_SIGNALING_AND_AGGREGATION                       |
| 3:151099733 | <i>MED12L</i>       | REACTOME_PLATELET_ACTIVATION_SIGNALING_AND_AGGREGATION                       |
| 4:90804532  | <i>SNCA_2</i>       | REACTOME_PLATELET_ACTIVATION_SIGNALING_AND_AGGREGATION                       |
| 4:90868355  | <i>SNCA_2</i>       | REACTOME_PLATELET_ACTIVATION_SIGNALING_AND_AGGREGATION                       |
| 6:112009427 | <i>FYN</i>          | REACTOME_PLATELET_ACTIVATION_SIGNALING_AND_AGGREGATION                       |
| 6:112056759 | <i>FYN</i>          | REACTOME_PLATELET_ACTIVATION_SIGNALING_AND_AGGREGATION                       |
| 6:112151452 | <i>FYN</i>          | REACTOME_PLATELET_ACTIVATION_SIGNALING_AND_AGGREGATION                       |
| 8:130914130 | <i>FAM49B</i>       | REACTOME_PLATELET_ACTIVATION_SIGNALING_AND_AGGREGATION                       |
| 19:3156505  | <i>SPPL2B</i>       | REACTOME_PLATELET_ACTIVATION_SIGNALING_AND_AGGREGATION                       |
| 6:112009427 | <i>FYN</i>          | REACTOME_PLATELET_ADHESION_TO_EXPOSED_COLLAGEN                               |
| 6:112056759 | <i>FYN</i>          | REACTOME_PLATELET_ADHESION_TO_EXPOSED_COLLAGEN                               |
| 6:112151452 | <i>FYN</i>          | REACTOME_PLATELET_ADHESION_TO_EXPOSED_COLLAGEN                               |
| 11:10647977 | <i>RNF141</i>       | REACTOME_PLATELET_HOMEOSTASIS                                                |
| 11:10648481 | <i>RNF141</i>       | REACTOME_PLATELET_HOMEOSTASIS                                                |
| 11:10660840 | <i>RNF141</i>       | REACTOME_PLATELET_HOMEOSTASIS                                                |
| 3:48199695  | <i>IP6K2</i>        | REACTOME_POLO_LIKE_KINASE_MEDIATED_EVENTS                                    |
| 3:48214438  | <i>IP6K2</i>        | REACTOME_POLO_LIKE_KINASE_MEDIATED_EVENTS                                    |
| 6:31862876  | <i>HLA-DRB5</i>     | REACTOME_POSITIVE_EPIGENETIC_REGULATION_OF_RRNA_EXPRESSION                   |
| 1:172386261 | <i>VAMP4</i>        | REACTOME_POST_TRANSLATIONAL_MODIFICATION: SYNTHESIS_OF_GPI_ANCHORED_PROTEINS |
| 1:172388441 | <i>VAMP4</i>        | REACTOME_POST_TRANSLATIONAL_MODIFICATION: SYNTHESIS_OF_GPI_ANCHORED_PROTEINS |
| 1:172389198 | <i>VAMP4</i>        | REACTOME_POST_TRANSLATIONAL_MODIFICATION: SYNTHESIS_OF_GPI_ANCHORED_PROTEINS |
| 4:15709252  | <i>BST1</i>         | REACTOME_POST_TRANSLATIONAL_MODIFICATION: SYNTHESIS_OF_GPI_ANCHORED_PROTEINS |
| 4:15713608  | <i>BST1</i>         | REACTOME_POST_TRANSLATIONAL_MODIFICATION: SYNTHESIS_OF_GPI_ANCHORED_PROTEINS |
| 4:15724372  | <i>BST1</i>         | REACTOME_POST_TRANSLATIONAL_MODIFICATION: SYNTHESIS_OF_GPI_ANCHORED_PROTEINS |
| 4:15737882  | <i>BST1</i>         | REACTOME_POST_TRANSLATIONAL_MODIFICATION: SYNTHESIS_OF_GPI_ANCHORED_PROTEINS |
| 4:76986566  | <i>FAM47E-STBD1</i> | REACTOME_POST_TRANSLATIONAL_MODIFICATION: SYNTHESIS_OF_GPI_ANCHORED_PROTEINS |
| 4:77021433  | <i>FAM47E-STBD1</i> | REACTOME_POST_TRANSLATIONAL_MODIFICATION: SYNTHESIS_OF_GPI_ANCHORED_PROTEINS |
| 6:133025715 | <i>RPS12</i>        | REACTOME_POST_TRANSLATIONAL_MODIFICATION: SYNTHESIS_OF_GPI_ANCHORED_PROTEINS |
| 6:133028870 | <i>RPS12</i>        | REACTOME_POST_TRANSLATIONAL_MODIFICATION: SYNTHESIS_OF_GPI_ANCHORED_PROTEINS |
| 6:133034076 | <i>RPS12</i>        | REACTOME_POST_TRANSLATIONAL_MODIFICATION: SYNTHESIS_OF_GPI_ANCHORED_PROTEINS |
| 1:172386261 | <i>VAMP4</i>        | REACTOME_POST_TRANSLATIONAL_PROTEIN_MODIFICATION                             |
| 1:172388441 | <i>VAMP4</i>        | REACTOME_POST_TRANSLATIONAL_PROTEIN_MODIFICATION                             |
| 1:172389198 | <i>VAMP4</i>        | REACTOME_POST_TRANSLATIONAL_PROTEIN_MODIFICATION                             |
| 2:134977261 | <i>TMEM163</i>      | REACTOME_POST_TRANSLATIONAL_PROTEIN_MODIFICATION                             |
| 2:135194840 | <i>TMEM163</i>      | REACTOME_POST_TRANSLATIONAL_PROTEIN_MODIFICATION                             |
| 2:135202455 | <i>TMEM163</i>      | REACTOME_POST_TRANSLATIONAL_PROTEIN_MODIFICATION                             |
| 3:48199695  | <i>IP6K2</i>        | REACTOME_POST_TRANSLATIONAL_PROTEIN_MODIFICATION                             |
| 3:48214438  | <i>IP6K2</i>        | REACTOME_POST_TRANSLATIONAL_PROTEIN_MODIFICATION                             |
| 3:49162284  | <i>IP6K2</i>        | REACTOME_POST_TRANSLATIONAL_PROTEIN_MODIFICATION                             |
| 3:49162583  | <i>IP6K2</i>        | REACTOME_POST_TRANSLATIONAL_PROTEIN_MODIFICATION                             |
| 3:49406095  | <i>IP6K2</i>        | REACTOME_POST_TRANSLATIONAL_PROTEIN_MODIFICATION                             |
| 3:49424231  | <i>IP6K2</i>        | REACTOME_POST_TRANSLATIONAL_PROTEIN_MODIFICATION                             |
| 3:49450137  | <i>IP6K2</i>        | REACTOME_POST_TRANSLATIONAL_PROTEIN_MODIFICATION                             |
| 3:49462410  | <i>IP6K2</i>        | REACTOME_POST_TRANSLATIONAL_PROTEIN_MODIFICATION                             |
| 3:49561208  | <i>IP6K2</i>        | REACTOME_POST_TRANSLATIONAL_PROTEIN_MODIFICATION                             |
| 3:49740895  | <i>IP6K2</i>        | REACTOME_POST_TRANSLATIONAL_PROTEIN_MODIFICATION                             |
| 3:121324643 | <i>KPNA1</i>        | REACTOME_POST_TRANSLATIONAL_PROTEIN_MODIFICATION                             |

|              |                     |                                                  |
|--------------|---------------------|--------------------------------------------------|
| 3:121340955  | <i>KPNA1</i>        | REACTOME_POST_TRANSLATIONAL_PROTEIN_MODIFICATION |
| 3:121411876  | <i>KPNA1</i>        | REACTOME_POST_TRANSLATIONAL_PROTEIN_MODIFICATION |
| 3:121412702  | <i>KPNA1</i>        | REACTOME_POST_TRANSLATIONAL_PROTEIN_MODIFICATION |
| 3:122645304  | <i>KPNA1</i>        | REACTOME_POST_TRANSLATIONAL_PROTEIN_MODIFICATION |
| 3:182656610  | <i>MCCC1</i>        | REACTOME_POST_TRANSLATIONAL_PROTEIN_MODIFICATION |
| 3:182976382  | <i>MCCC1</i>        | REACTOME_POST_TRANSLATIONAL_PROTEIN_MODIFICATION |
| 3:182979912  | <i>MCCC1</i>        | REACTOME_POST_TRANSLATIONAL_PROTEIN_MODIFICATION |
| 3:183005320  | <i>MCCC1</i>        | REACTOME_POST_TRANSLATIONAL_PROTEIN_MODIFICATION |
| 4:15608677   | <i>BST1</i>         | REACTOME_POST_TRANSLATIONAL_PROTEIN_MODIFICATION |
| 4:15709252   | <i>BST1</i>         | REACTOME_POST_TRANSLATIONAL_PROTEIN_MODIFICATION |
| 4:15713608   | <i>BST1</i>         | REACTOME_POST_TRANSLATIONAL_PROTEIN_MODIFICATION |
| 4:15724372   | <i>BST1</i>         | REACTOME_POST_TRANSLATIONAL_PROTEIN_MODIFICATION |
| 4:15737882   | <i>BST1</i>         | REACTOME_POST_TRANSLATIONAL_PROTEIN_MODIFICATION |
| 4:76695927   | <i>FAM47E-STBD1</i> | REACTOME_POST_TRANSLATIONAL_PROTEIN_MODIFICATION |
| 4:76986566   | <i>FAM47E-STBD1</i> | REACTOME_POST_TRANSLATIONAL_PROTEIN_MODIFICATION |
| 4:77021433   | <i>FAM47E-STBD1</i> | REACTOME_POST_TRANSLATIONAL_PROTEIN_MODIFICATION |
| 4:113938109  | <i>CAMK2D</i>       | REACTOME_POST_TRANSLATIONAL_PROTEIN_MODIFICATION |
| 4:114077386  | <i>CAMK2D</i>       | REACTOME_POST_TRANSLATIONAL_PROTEIN_MODIFICATION |
| 4:114217997  | <i>CAMK2D</i>       | REACTOME_POST_TRANSLATIONAL_PROTEIN_MODIFICATION |
| 5:133710339  | <i>C5orf24</i>      | REACTOME_POST_TRANSLATIONAL_PROTEIN_MODIFICATION |
| 6:32151443   | <i>HLA-DRB5</i>     | REACTOME_POST_TRANSLATIONAL_PROTEIN_MODIFICATION |
| 6:32814942   | <i>HLA-DRB5</i>     | REACTOME_POST_TRANSLATIONAL_PROTEIN_MODIFICATION |
| 6:133025715  | <i>RPS12</i>        | REACTOME_POST_TRANSLATIONAL_PROTEIN_MODIFICATION |
| 6:133028870  | <i>RPS12</i>        | REACTOME_POST_TRANSLATIONAL_PROTEIN_MODIFICATION |
| 6:133034076  | <i>RPS12</i>        | REACTOME_POST_TRANSLATIONAL_PROTEIN_MODIFICATION |
| 7:66096028   | <i>GS1-124K5.11</i> | REACTOME_POST_TRANSLATIONAL_PROTEIN_MODIFICATION |
| 9:18650547   | <i>SH3GL2_2</i>     | REACTOME_POST_TRANSLATIONAL_PROTEIN_MODIFICATION |
| 9:33845203   | <i>UBAP2</i>        | REACTOME_POST_TRANSLATIONAL_PROTEIN_MODIFICATION |
| 10:103185542 | <i>GBF1</i>         | REACTOME_POST_TRANSLATIONAL_PROTEIN_MODIFICATION |
| 10:103308244 | <i>GBF1</i>         | REACTOME_POST_TRANSLATIONAL_PROTEIN_MODIFICATION |
| 10:104005410 | <i>GBF1</i>         | REACTOME_POST_TRANSLATIONAL_PROTEIN_MODIFICATION |
| 10:104034550 | <i>GBF1</i>         | REACTOME_POST_TRANSLATIONAL_PROTEIN_MODIFICATION |
| 10:104258303 | <i>GBF1</i>         | REACTOME_POST_TRANSLATIONAL_PROTEIN_MODIFICATION |
| 10:121683206 | <i>INPP5F</i>       | REACTOME_POST_TRANSLATIONAL_PROTEIN_MODIFICATION |
| 10:121686714 | <i>INPP5F</i>       | REACTOME_POST_TRANSLATIONAL_PROTEIN_MODIFICATION |
| 10:121689030 | <i>INPP5F</i>       | REACTOME_POST_TRANSLATIONAL_PROTEIN_MODIFICATION |
| 12:132687184 | <i>FBRSL1</i>       | REACTOME_POST_TRANSLATIONAL_PROTEIN_MODIFICATION |
| 14:76159192  | <i>RPS6KL1</i>      | REACTOME_POST_TRANSLATIONAL_PROTEIN_MODIFICATION |
| 15:61293467  | <i>VPS13C</i>       | REACTOME_POST_TRANSLATIONAL_PROTEIN_MODIFICATION |
| 16:50730088  | <i>CASC16</i>       | REACTOME_POST_TRANSLATIONAL_PROTEIN_MODIFICATION |
| 16:50730446  | <i>CASC16</i>       | REACTOME_POST_TRANSLATIONAL_PROTEIN_MODIFICATION |
| 16:50745926  | <i>CASC16</i>       | REACTOME_POST_TRANSLATIONAL_PROTEIN_MODIFICATION |
| 17:7491546   | <i>V1NB1</i>        | REACTOME_POST_TRANSLATIONAL_PROTEIN_MODIFICATION |
| 17:7578671   | <i>V1NB1</i>        | REACTOME_POST_TRANSLATIONAL_PROTEIN_MODIFICATION |
| 17:44800946  | <i>WNT3</i>         | REACTOME_POST_TRANSLATIONAL_PROTEIN_MODIFICATION |
| 17:44833217  | <i>WNT3</i>         | REACTOME_POST_TRANSLATIONAL_PROTEIN_MODIFICATION |
| 17:45059032  | <i>WNT3</i>         | REACTOME_POST_TRANSLATIONAL_PROTEIN_MODIFICATION |
| 17:45089680  | <i>WNT3</i>         | REACTOME_POST_TRANSLATIONAL_PROTEIN_MODIFICATION |
| 1:154804988  | <i>GBAP1</i>        | REACTOME_POTASSIUM_CHANNELS                      |
| 2:18143082   | <i>KCNS3</i>        | REACTOME_POTASSIUM_CHANNELS                      |
| 2:18176120   | <i>KCNS3</i>        | REACTOME_POTASSIUM_CHANNELS                      |
| 2:18247777   | <i>KCNS3</i>        | REACTOME_POTASSIUM_CHANNELS                      |
| 2:18296870   | <i>KCNS3</i>        | REACTOME_POTASSIUM_CHANNELS                      |

|              |          |                                                            |
|--------------|----------|------------------------------------------------------------|
| 2:18335515   | KCNS3    | REACTOME_POTASSIUM_CHANNELS                                |
| 3:19312697   | SATB1    | REACTOME_POTASSIUM_CHANNELS                                |
| 3:19334895   | SATB1    | REACTOME_POTASSIUM_CHANNELS                                |
| 6:29579544   | TRIM40   | REACTOME_POTASSIUM_CHANNELS                                |
| 17:7832034   | V1NB1    | REACTOME_POTASSIUM_CHANNELS                                |
| 21:39197323  | DYRK1A   | REACTOME_POTASSIUM_CHANNELS                                |
| 6:33381459   | HLA-DRB5 | REACTOME_PRC2_METHYLATES_HISTONES_AND_DNA                  |
| 6:32186193   | HLA-DRB5 | REACTOME_PRE_NOTCH_EXPRESSION_AND_PROCESSING               |
| 17:7578671   | V1NB1    | REACTOME_PRE_NOTCH_EXPRESSION_AND_PROCESSING               |
| 6:32186193   | HLA-DRB5 | REACTOME_PRE_NOTCH_PROCESSING_IN_GOLGI                     |
| 6:32186193   | HLA-DRB5 | REACTOME_PRE_NOTCH_PROCESSING_IN_THE_ENDOPLASMIC_RETICULUM |
| 6:30628082   | TRIM40   | REACTOME_PROCESSING_OF_CAPPED_INTRON_CONTAINING_PRE_MRNA   |
| 6:30631063   | TRIM40   | REACTOME_PROCESSING_OF_CAPPED_INTRON_CONTAINING_PRE_MRNA   |
| 6:30639369   | TRIM40   | REACTOME_PROCESSING_OF_CAPPED_INTRON_CONTAINING_PRE_MRNA   |
| 11:82886475  | DLG2     | REACTOME_PROCESSING_OF_CAPPED_INTRON_CONTAINING_PRE_MRNA   |
| 17:42929985  | CRHR1_2  | REACTOME_PROCESSING_OF_CAPPED_INTRON_CONTAINING_PRE_MRNA   |
| 11:82886475  | DLG2     | REACTOME_PROCESSING_OF_CAPPED_INTRONLESS_PRE_MRNA          |
| 17:59922925  | BRIP1    | REACTOME_PROCESSING_OF_DNA_DOUBLE_STRAND_BREAK_ENDS        |
| 11:82886475  | DLG2     | REACTOME_PROCESSING_OF_INTRONLESS_PRE_MRNAS                |
| 1:156059276  | GBAP1    | REACTOME_PROGRAMMED_CELL_DEATH                             |
| 6:32814942   | HLA-DRB5 | REACTOME_PROGRAMMED_CELL_DEATH                             |
| 8:23050400   | BIN3     | REACTOME_PROGRAMMED_CELL_DEATH                             |
| 17:7578671   | V1NB1    | REACTOME_PROGRAMMED_CELL_DEATH                             |
| 17:43132290  | CRHR1_2  | REACTOME_PROGRAMMED_CELL_DEATH                             |
| 17:43999203  | WNT3     | REACTOME_PROGRAMMED_CELL_DEATH                             |
| 17:44005297  | WNT3     | REACTOME_PROGRAMMED_CELL_DEATH                             |
| 17:44019712  | WNT3     | REACTOME_PROGRAMMED_CELL_DEATH                             |
| 17:44060492  | WNT3     | REACTOME_PROGRAMMED_CELL_DEATH                             |
| 17:44065263  | WNT3     | REACTOME_PROGRAMMED_CELL_DEATH                             |
| 17:44081178  | WNT3     | REACTOME_PROGRAMMED_CELL_DEATH                             |
| 17:44083297  | WNT3     | REACTOME_PROGRAMMED_CELL_DEATH                             |
| 10:103185542 | GBF1     | REACTOME_PROLACTIN_RECEPTOR_SIGNALING                      |
| 10:103308244 | GBF1     | REACTOME_PROLACTIN_RECEPTOR_SIGNALING                      |
| 17:40392358  | RETREG3  | REACTOME_PROLACTIN_RECEPTOR_SIGNALING                      |
| 4:15608677   | BST1     | REACTOME_PROTEIN_FOLDING                                   |
| 1:155181232  | GBAP1    | REACTOME_PROTEIN_LOCALIZATION                              |
| 3:150298317  | MED12L   | REACTOME_PROTEIN_LOCALIZATION                              |
| 6:31607942   | HLA-DRB5 | REACTOME_PROTEIN_LOCALIZATION                              |
| 12:39960237  | LRRK2_2  | REACTOME_PROTEIN_LOCALIZATION                              |
| 12:133295501 | FBRSL1   | REACTOME_PROTEIN_LOCALIZATION                              |
| 11:83188607  | DLG2     | REACTOME_PROTEIN_PROTEIN_INTERACTIONS_AT_SYNAPSES          |
| 11:83219006  | DLG2     | REACTOME_PROTEIN_PROTEIN_INTERACTIONS_AT_SYNAPSES          |
| 11:83538733  | DLG2     | REACTOME_PROTEIN_PROTEIN_INTERACTIONS_AT_SYNAPSES          |
| 11:83544472  | DLG2     | REACTOME_PROTEIN_PROTEIN_INTERACTIONS_AT_SYNAPSES          |
| 11:83656201  | DLG2     | REACTOME_PROTEIN_PROTEIN_INTERACTIONS_AT_SYNAPSES          |
| 11:83700228  | DLG2     | REACTOME_PROTEIN_PROTEIN_INTERACTIONS_AT_SYNAPSES          |
| 11:83762918  | DLG2     | REACTOME_PROTEIN_PROTEIN_INTERACTIONS_AT_SYNAPSES          |
| 11:83894247  | DLG2     | REACTOME_PROTEIN_PROTEIN_INTERACTIONS_AT_SYNAPSES          |
| 11:84021037  | DLG2     | REACTOME_PROTEIN_PROTEIN_INTERACTIONS_AT_SYNAPSES          |
| 11:84324361  | DLG2     | REACTOME_PROTEIN_PROTEIN_INTERACTIONS_AT_SYNAPSES          |
| 11:84373496  | DLG2     | REACTOME_PROTEIN_PROTEIN_INTERACTIONS_AT_SYNAPSES          |
| 11:84403409  | DLG2     | REACTOME_PROTEIN_PROTEIN_INTERACTIONS_AT_SYNAPSES          |
| 17:7101771   | V1NB1    | REACTOME_PROTEIN_PROTEIN_INTERACTIONS_AT_SYNAPSES          |

|              |                 |                                                                           |
|--------------|-----------------|---------------------------------------------------------------------------|
| 5:133710339  | <i>C5orf24</i>  | REACTOME_PROTEIN_UBIQUITINATION                                           |
| 9:33845203   | <i>UBAP2</i>    | REACTOME_PROTEIN_UBIQUITINATION                                           |
| 6:32814942   | <i>HLA-DRB5</i> | REACTOME_PTEN_REGULATION                                                  |
| 17:7578671   | <i>V1NB1</i>    | REACTOME_PTEN_REGULATION                                                  |
| 7:23277372   | <i>GPNMB</i>    | REACTOME_PTK6_PROMOTES_HIF1A_STABILIZATION                                |
| 7:23293746   | <i>GPNMB</i>    | REACTOME_PTK6_PROMOTES_HIF1A_STABILIZATION                                |
| 7:23313171   | <i>GPNMB</i>    | REACTOME_PTK6_PROMOTES_HIF1A_STABILIZATION                                |
| 12:40614434  | <i>LRRK2_2</i>  | REACTOME_PTK6_PROMOTES_HIF1A_STABILIZATION                                |
| 12:40614656  | <i>LRRK2_2</i>  | REACTOME_PTK6_PROMOTES_HIF1A_STABILIZATION                                |
| 12:40617231  | <i>LRRK2_2</i>  | REACTOME_PTK6_PROMOTES_HIF1A_STABILIZATION                                |
| 12:40653993  | <i>LRRK2_2</i>  | REACTOME_PTK6_PROMOTES_HIF1A_STABILIZATION                                |
| 12:40698422  | <i>LRRK2_2</i>  | REACTOME_PTK6_PROMOTES_HIF1A_STABILIZATION                                |
| 12:40707861  | <i>LRRK2_2</i>  | REACTOME_PTK6_PROMOTES_HIF1A_STABILIZATION                                |
| 12:40753796  | <i>LRRK2_2</i>  | REACTOME_PTK6_PROMOTES_HIF1A_STABILIZATION                                |
| 3:49406095   | <i>IP6K2</i>    | REACTOME_PTK6_REGULATES_RHO_GTPASES_RAS_GTPASE_AND_MAP_KINASES            |
| 3:49424231   | <i>IP6K2</i>    | REACTOME_PTK6_REGULATES_RHO_GTPASES_RAS_GTPASE_AND_MAP_KINASES            |
| 3:49450137   | <i>IP6K2</i>    | REACTOME_PTK6_REGULATES_RHO_GTPASES_RAS_GTPASE_AND_MAP_KINASES            |
| 10:104847713 | <i>GBF1</i>     | REACTOME_PURINE_CATABOLISM                                                |
| 10:104861736 | <i>GBF1</i>     | REACTOME_PURINE_CATABOLISM                                                |
| 10:104926485 | <i>GBF1</i>     | REACTOME_PURINE_CATABOLISM                                                |
| 10:104929716 | <i>GBF1</i>     | REACTOME_PURINE_CATABOLISM                                                |
| 11:10392432  | <i>RNF141</i>   | REACTOME_PURINE_SALVAGE                                                   |
| 11:10487997  | <i>RNF141</i>   | REACTOME_PURINE_SALVAGE                                                   |
| 17:76177567  | <i>DNAH17</i>   | REACTOME_PYRIMIDINE_SALVAGE                                               |
| 2:135921205  | <i>TMEM163</i>  | REACTOME_RAB_GEF5_EXCHANGE_GTP_FOR_GDP_ON_RABS                            |
| 2:135921205  | <i>TMEM163</i>  | REACTOME_RAB_REGULATION_OF_TRAFFICKING                                    |
| 4:114424939  | <i>CAMK2D</i>   | REACTOME_RAF_ACTIVATION                                                   |
| 4:114424939  | <i>CAMK2D</i>   | REACTOME_RAS_ACTIVATION_UPON_CA2PLUS_INFLUX_THROUGH_NMDA_RECEPTOR         |
| 11:83188607  | <i>DLG2</i>     | REACTOME_RAS_ACTIVATION_UPON_CA2PLUS_INFLUX_THROUGH_NMDA_RECEPTOR         |
| 11:83219006  | <i>DLG2</i>     | REACTOME_RAS_ACTIVATION_UPON_CA2PLUS_INFLUX_THROUGH_NMDA_RECEPTOR         |
| 11:83538733  | <i>DLG2</i>     | REACTOME_RAS_ACTIVATION_UPON_CA2PLUS_INFLUX_THROUGH_NMDA_RECEPTOR         |
| 11:83544472  | <i>DLG2</i>     | REACTOME_RAS_ACTIVATION_UPON_CA2PLUS_INFLUX_THROUGH_NMDA_RECEPTOR         |
| 11:83656201  | <i>DLG2</i>     | REACTOME_RAS_ACTIVATION_UPON_CA2PLUS_INFLUX_THROUGH_NMDA_RECEPTOR         |
| 11:83700228  | <i>DLG2</i>     | REACTOME_RAS_ACTIVATION_UPON_CA2PLUS_INFLUX_THROUGH_NMDA_RECEPTOR         |
| 11:83762918  | <i>DLG2</i>     | REACTOME_RAS_ACTIVATION_UPON_CA2PLUS_INFLUX_THROUGH_NMDA_RECEPTOR         |
| 11:83894247  | <i>DLG2</i>     | REACTOME_RAS_ACTIVATION_UPON_CA2PLUS_INFLUX_THROUGH_NMDA_RECEPTOR         |
| 11:84021037  | <i>DLG2</i>     | REACTOME_RAS_ACTIVATION_UPON_CA2PLUS_INFLUX_THROUGH_NMDA_RECEPTOR         |
| 11:84324361  | <i>DLG2</i>     | REACTOME_RAS_ACTIVATION_UPON_CA2PLUS_INFLUX_THROUGH_NMDA_RECEPTOR         |
| 11:84373496  | <i>DLG2</i>     | REACTOME_RAS_ACTIVATION_UPON_CA2PLUS_INFLUX_THROUGH_NMDA_RECEPTOR         |
| 11:84403409  | <i>DLG2</i>     | REACTOME_RAS_ACTIVATION_UPON_CA2PLUS_INFLUX_THROUGH_NMDA_RECEPTOR         |
| 17:7101771   | <i>V1NB1</i>    | REACTOME_RAS_ACTIVATION_UPON_CA2PLUS_INFLUX_THROUGH_NMDA_RECEPTOR         |
| 12:133295501 | <i>FBRSL1</i>   | REACTOME_RECEPTOR_MEDIATED_MITOPHAGY                                      |
| 5:133710339  | <i>C5orf24</i>  | REACTOME_RECOGNITION_OF_DNA_DAMAGE_BY_PCNA_CONTAINING_REPLICATION_COMPLEX |
| 12:133206648 | <i>FBRSL1</i>   | REACTOME_RECOGNITION_OF_DNA_DAMAGE_BY_PCNA_CONTAINING_REPLICATION_COMPLEX |
| 12:133223685 | <i>FBRSL1</i>   | REACTOME_RECOGNITION_OF_DNA_DAMAGE_BY_PCNA_CONTAINING_REPLICATION_COMPLEX |
| 12:133225045 | <i>FBRSL1</i>   | REACTOME_RECOGNITION_OF_DNA_DAMAGE_BY_PCNA_CONTAINING_REPLICATION_COMPLEX |
| 10:104258303 | <i>GBF1</i>     | REACTOME_RECRUITMENT_OF_NUMA_TO_MITOTIC_CENTROSOMES                       |
| 17:40818584  | <i>RETREG3</i>  | REACTOME_RECRUITMENT_OF_NUMA_TO_MITOTIC_CENTROSOMES                       |
| 1:171945488  | <i>VAMP4</i>    | REACTOME_RECYCLING_PATHWAY_OF_L1                                          |
| 1:172137119  | <i>VAMP4</i>    | REACTOME_RECYCLING_PATHWAY_OF_L1                                          |
| 1:172386261  | <i>VAMP4</i>    | REACTOME_RECYCLING_PATHWAY_OF_L1                                          |
| 9:17579690   | <i>SH3GL2_2</i> | REACTOME_RECYCLING_PATHWAY_OF_L1                                          |
| 9:17609302   | <i>SH3GL2_2</i> | REACTOME_RECYCLING_PATHWAY_OF_L1                                          |

|              |          |                                                                                                         |
|--------------|----------|---------------------------------------------------------------------------------------------------------|
| 9:17627444   | SH3GL2_2 | REACTOME_RECYCLING_PATHWAY_OF_L1                                                                        |
| 9:17710876   | SH3GL2_2 | REACTOME_RECYCLING_PATHWAY_OF_L1                                                                        |
| 9:17732590   | SH3GL2_2 | REACTOME_RECYCLING_PATHWAY_OF_L1                                                                        |
| 9:17737514   | SH3GL2_2 | REACTOME_RECYCLING_PATHWAY_OF_L1                                                                        |
| 9:17758945   | SH3GL2_2 | REACTOME_RECYCLING_PATHWAY_OF_L1                                                                        |
| 6:112009427  | FYN      | REACTOME_REELIN_SIGNALLING_PATHWAY                                                                      |
| 6:112056759  | FYN      | REACTOME_REELIN_SIGNALLING_PATHWAY                                                                      |
| 6:112151452  | FYN      | REACTOME_REELIN_SIGNALLING_PATHWAY                                                                      |
| 8:23050400   | BIN3     | REACTOME_REGULATED_NECROSIS                                                                             |
| 1:227067656  | ITPKB    | REACTOME_REGULATED_PROTEOLYSIS_OF_P75NTR                                                                |
| 8:23050400   | BIN3     | REACTOME_REGULATION_BY_C_FLP                                                                            |
| 6:32814942   | HLA-DRB5 | REACTOME_REGULATION_OF_APOPTOSIS                                                                        |
| 3:49561208   | IP6K2    | REACTOME_REGULATION_OF_EXPRESSION_OF_SLITS_AND_ROBOS                                                    |
| 6:32814942   | HLA-DRB5 | REACTOME_REGULATION_OF_EXPRESSION_OF_SLITS_AND_ROBOS                                                    |
| 10:121429633 | INPP5F   | REACTOME_REGULATION_OF_HSF1_MEDIATED_HEAT_SHOCK_RESPONSE                                                |
| 10:121437329 | INPP5F   | REACTOME_REGULATION_OF_HSF1_MEDIATED_HEAT_SHOCK_RESPONSE                                                |
| 17:40132591  | RETREG3  | REACTOME_REGULATION_OF_HSF1_MEDIATED_HEAT_SHOCK_RESPONSE                                                |
| 3:49162284   | IP6K2    | REGULATION_OF_INSULIN_LIKE_GROWTH_FACTOR_IGF_TRANSPORT_AND_UPTAKE_BY_INSULIN_LIKE_GROWTH_FACTOR_BINDING |
| 3:49162583   | IP6K2    | REGULATION_OF_INSULIN_LIKE_GROWTH_FACTOR_IGF_TRANSPORT_AND_UPTAKE_BY_INSULIN_LIKE_GROWTH_FACTOR_BINDING |
| 2:18143082   | KCNS3    | REACTOME_REGULATION_OF_INSULIN_SECRETION                                                                |
| 2:18176120   | KCNS3    | REACTOME_REGULATION_OF_INSULIN_SECRETION                                                                |
| 2:18247777   | KCNS3    | REACTOME_REGULATION_OF_INSULIN_SECRETION                                                                |
| 2:18296870   | KCNS3    | REACTOME_REGULATION_OF_INSULIN_SECRETION                                                                |
| 2:18335515   | KCNS3    | REACTOME_REGULATION_OF_INSULIN_SECRETION                                                                |
| 3:48835245   | IP6K2    | REACTOME_REGULATION_OF_INSULIN_SECRETION                                                                |
| 3:123057397  | KPNA1    | REACTOME_REGULATION_OF_INSULIN_SECRETION                                                                |
| 19:3156505   | SPPL2B   | REACTOME_REGULATION_OF_INSULIN_SECRETION                                                                |
| 6:112009427  | FYN      | REACTOME_REGULATION_OF_KIT_SIGNALING                                                                    |
| 6:112056759  | FYN      | REACTOME_REGULATION_OF_KIT_SIGNALING                                                                    |
| 6:112151452  | FYN      | REACTOME_REGULATION_OF_KIT_SIGNALING                                                                    |
| 2:101439596  | MAP4K4   | REACTOME_REGULATION_OF_LIPID_METABOLISM_BY_PEROXISOME_PROLIFERATOR_ACTIVATED_RECEPTOR_ALPHA_PPARALP     |
| 2:101550181  | MAP4K4   | REACTOME_REGULATION_OF_LIPID_METABOLISM_BY_PEROXISOME_PROLIFERATOR_ACTIVATED_RECEPTOR_ALPHA_PPARALP     |
| 2:101603812  | MAP4K4   | REACTOME_REGULATION_OF_LIPID_METABOLISM_BY_PEROXISOME_PROLIFERATOR_ACTIVATED_RECEPTOR_ALPHA_PPARALP     |
| 4:17622910   | LCORL    | REACTOME_REGULATION_OF_LIPID_METABOLISM_BY_PEROXISOME_PROLIFERATOR_ACTIVATED_RECEPTOR_ALPHA_PPARALP     |
| 4:17632603   | LCORL    | REACTOME_REGULATION_OF_LIPID_METABOLISM_BY_PEROXISOME_PROLIFERATOR_ACTIVATED_RECEPTOR_ALPHA_PPARALP     |
| 15:61293467  | VPS13C   | REACTOME_REGULATION_OF_LIPID_METABOLISM_BY_PEROXISOME_PROLIFERATOR_ACTIVATED_RECEPTOR_ALPHA_PPARALP     |
| 4:114424939  | CAMK2D   | REACTOME_REGULATION_OF_MECP2_EXPRESSION_AND_ACTIVITY                                                    |
| 6:32814942   | HLA-DRB5 | REACTOME_REGULATION_OF_MITOTIC_CELL_CYCLE                                                               |
| 10:103185542 | GBF1     | REACTOME_REGULATION_OF_MITOTIC_CELL_CYCLE                                                               |
| 10:103308244 | GBF1     | REACTOME_REGULATION_OF_MITOTIC_CELL_CYCLE                                                               |
| 17:45215865  | WNT3     | REACTOME_REGULATION_OF_MITOTIC_CELL_CYCLE                                                               |
| 17:45244822  | WNT3     | REACTOME_REGULATION_OF_MITOTIC_CELL_CYCLE                                                               |
| 6:32814942   | HLA-DRB5 | REACTOME_REGULATION_OF_MRNA_STABILITY_BY_PROTEINS_THAT_BIND_AU_RICH_ELEMENTS                            |
| 10:103185542 | GBF1     | REACTOME_REGULATION_OF_PLK1_ACTIVITY_AT_G2_M_TRANSITION                                                 |
| 10:103308244 | GBF1     | REACTOME_REGULATION_OF_PLK1_ACTIVITY_AT_G2_M_TRANSITION                                                 |
| 10:104258303 | GBF1     | REACTOME_REGULATION_OF_PLK1_ACTIVITY_AT_G2_M_TRANSITION                                                 |
| 17:7578671   | V1NB1    | REACTOME_REGULATION_OF_PTEN_GENE_TRANSCRIPTION                                                          |
| 6:32814942   | HLA-DRB5 | REACTOME_REGULATION_OF_PTEN_STABILITY_AND_ACTIVITY                                                      |
| 6:32814942   | HLA-DRB5 | REACTOME_REGULATION_OF_RAS_BY_GAPS                                                                      |
| 6:32814942   | HLA-DRB5 | REACTOME_REGULATION_OF_RUNX2_EXPRESSION_AND_ACTIVITY                                                    |
| 6:32814942   | HLA-DRB5 | REACTOME_REGULATION_OF_RUNX3_EXPRESSION_AND_ACTIVITY                                                    |
| 6:112009427  | FYN      | REACTOME_REGULATION_OF_SIGNALING_BY_CBL                                                                 |
| 6:112056759  | FYN      | REACTOME_REGULATION_OF_SIGNALING_BY_CBL                                                                 |

|              |                 |                                                                                                         |
|--------------|-----------------|---------------------------------------------------------------------------------------------------------|
| 6:112151452  | <i>FYN</i>      | REACTOME_REGULATION_OF_SIGNALING_BY_CBL                                                                 |
| 19:2335872   | <i>SPPL2B</i>   | REACTOME_REGULATION_OF_TNFR1_SIGNALING                                                                  |
| 19:2346990   | <i>SPPL2B</i>   | REACTOME_REGULATION_OF_TNFR1_SIGNALING                                                                  |
| 19:2352757   | <i>SPPL2B</i>   | REACTOME_REGULATION_OF_TNFR1_SIGNALING                                                                  |
| 6:31862876   | <i>HLA-DRB5</i> | REACTOME_REGULATION_OF_TP53_ACTIVITY                                                                    |
| 17:7578671   | <i>V1NB1</i>    | REACTOME_REGULATION_OF_TP53_ACTIVITY                                                                    |
| 17:59922925  | <i>BRIP1</i>    | REACTOME_REGULATION_OF_TP53_ACTIVITY                                                                    |
| 17:7578671   | <i>V1NB1</i>    | REACTOME_REGULATION_OF_TP53_ACTIVITY_THROUGH_ACETYLATION                                                |
| 17:7578671   | <i>V1NB1</i>    | REACTOME_REGULATION_OF_TP53_ACTIVITY_THROUGH_ASSOCIATION_WITH_CO_FACTORS                                |
| 6:31862876   | <i>HLA-DRB5</i> | REACTOME_REGULATION_OF_TP53_ACTIVITY_THROUGH_METHYLATION                                                |
| 17:7578671   | <i>V1NB1</i>    | REACTOME_REGULATION_OF_TP53_ACTIVITY_THROUGH_METHYLATION                                                |
| 17:7578671   | <i>V1NB1</i>    | REACTOME_REGULATION_OF_TP53_ACTIVITY_THROUGH_PHOSPHORYLATION                                            |
| 17:59922925  | <i>BRIP1</i>    | REACTOME_REGULATION_OF_TP53_ACTIVITY_THROUGH_PHOSPHORYLATION                                            |
| 17:7578671   | <i>V1NB1</i>    | REACTOME_REGULATION_OF_TP53_EXPRESSION_AND_DEGRADATION                                                  |
| 19:3022354   | <i>SPPL2B</i>   | REACTOME_REPRESSION_OF_WNT_TARGET_GENES                                                                 |
| 19:3036350   | <i>SPPL2B</i>   | REACTOME_REPRESSION_OF_WNT_TARGET_GENES                                                                 |
| 1:156059276  | <i>GBAP1</i>    | REACTOME_REPRODUCTION                                                                                   |
| 5:134315853  | <i>C5orf24</i>  | REACTOME_REPRODUCTION                                                                                   |
| 14:75495059  | <i>RPS6KL1</i>  | REACTOME_REPRODUCTION                                                                                   |
| 12:133206648 | <i>FBRSL1</i>   | REACTOME_RESOLUTION_OF_ABASIC_SITES_AP_SITES                                                            |
| 12:133223685 | <i>FBRSL1</i>   | REACTOME_RESOLUTION_OF_ABASIC_SITES_AP_SITES                                                            |
| 12:133225045 | <i>FBRSL1</i>   | REACTOME_RESOLUTION_OF_ABASIC_SITES_AP_SITES                                                            |
| 12:133206648 | <i>FBRSL1</i>   | REACTOME_RESOLUTION_OF_AP_SITES_VIA_THE_MULTIPLE_NUCLEOTIDE_PATCH_REPLACEMENT_PATHWAY                   |
| 12:133223685 | <i>FBRSL1</i>   | REACTOME_RESOLUTION_OF_AP_SITES_VIA_THE_MULTIPLE_NUCLEOTIDE_PATCH_REPLACEMENT_PATHWAY                   |
| 12:133225045 | <i>FBRSL1</i>   | REACTOME_RESOLUTION_OF_AP_SITES_VIA_THE_MULTIPLE_NUCLEOTIDE_PATCH_REPLACEMENT_PATHWAY                   |
| 17:59922925  | <i>BRIP1</i>    | REACTOME_RESOLUTION_OF_D_LOOP_STRUCTURES                                                                |
| 17:59922925  | <i>BRIP1</i>    | REACTOME_RESOLUTION_OF_D_LOOP_STRUCTURES_THROUGH_SYNTHESIS_DEPENDENT_STRAND_ANNEALING_SDSA              |
| 12:122816734 | <i>HIP1R</i>    | REACTOME_RESOLUTION_OF_SISTER_CHROMATID_COHESION                                                        |
| 12:122817580 | <i>HIP1R</i>    | REACTOME_RESOLUTION_OF_SISTER_CHROMATID_COHESION                                                        |
| 12:122853197 | <i>HIP1R</i>    | REACTOME_RESOLUTION_OF_SISTER_CHROMATID_COHESION                                                        |
| 12:123057792 | <i>HIP1R</i>    | REACTOME_RESOLUTION_OF_SISTER_CHROMATID_COHESION                                                        |
| 12:123110365 | <i>HIP1R</i>    | REACTOME_RESOLUTION_OF_SISTER_CHROMATID_COHESION                                                        |
| 12:123110785 | <i>HIP1R</i>    | REACTOME_RESOLUTION_OF_SISTER_CHROMATID_COHESION                                                        |
| 1:161171736  | <i>FCGR2A</i>   | RESPIRATORY_ELECTRON_TRANSPORT_ATP_SYNTHESIS_BY_CHEMIOSMOTIC_COUPLING_AND_HEAT_PRODUCTION_BY_UNCOUPLING |
| 5:60273923   | <i>ELOVL7</i>   | RESPIRATORY_ELECTRON_TRANSPORT_ATP_SYNTHESIS_BY_CHEMIOSMOTIC_COUPLING_AND_HEAT_PRODUCTION_BY_UNCOUPLING |
| 1:161171736  | <i>FCGR2A</i>   | REACTOME_RESPIRATORY_ELECTRON_TRANSPORT                                                                 |
| 5:60273923   | <i>ELOVL7</i>   | REACTOME_RESPIRATORY_ELECTRON_TRANSPORT                                                                 |
| 4:90804532   | <i>SNCA_2</i>   | REACTOME_RESPONSE_TO_ELEVATED_PLATELET_CYTOSOLIC_CA2PLUS                                                |
| 4:90868355   | <i>SNCA_2</i>   | REACTOME_RESPONSE_TO_ELEVATED_PLATELET_CYTOSOLIC_CA2PLUS                                                |
| 8:130914130  | <i>FAM49B</i>   | REACTOME_RESPONSE_TO_ELEVATED_PLATELET_CYTOSOLIC_CA2PLUS                                                |
| 1:171945488  | <i>VAMP4</i>    | REACTOME_RETROGRADE_NEUROTROPHIN_SIGNALLING                                                             |
| 1:172137119  | <i>VAMP4</i>    | REACTOME_RETROGRADE_NEUROTROPHIN_SIGNALLING                                                             |
| 1:172386261  | <i>VAMP4</i>    | REACTOME_RETROGRADE_NEUROTROPHIN_SIGNALLING                                                             |
| 9:17579690   | <i>SH3GL2_2</i> | REACTOME_RETROGRADE_NEUROTROPHIN_SIGNALLING                                                             |
| 9:17609302   | <i>SH3GL2_2</i> | REACTOME_RETROGRADE_NEUROTROPHIN_SIGNALLING                                                             |
| 9:17627444   | <i>SH3GL2_2</i> | REACTOME_RETROGRADE_NEUROTROPHIN_SIGNALLING                                                             |
| 9:17710876   | <i>SH3GL2_2</i> | REACTOME_RETROGRADE_NEUROTROPHIN_SIGNALLING                                                             |
| 9:17732590   | <i>SH3GL2_2</i> | REACTOME_RETROGRADE_NEUROTROPHIN_SIGNALLING                                                             |
| 9:17737514   | <i>SH3GL2_2</i> | REACTOME_RETROGRADE_NEUROTROPHIN_SIGNALLING                                                             |
| 9:17758945   | <i>SH3GL2_2</i> | REACTOME_RETROGRADE_NEUROTROPHIN_SIGNALLING                                                             |
| 1:171689486  | <i>VAMP4</i>    | REACTOME_RETROGRADE_TRANSPORT_AT_THE_TRANS_GOLGI_NETWORK                                                |
| 17:44800946  | <i>WNT3</i>     | REACTOME_RETROGRADE_TRANSPORT_AT_THE_TRANS_GOLGI_NETWORK                                                |
| 17:44833217  | <i>WNT3</i>     | REACTOME_RETROGRADE_TRANSPORT_AT_THE_TRANS_GOLGI_NETWORK                                                |

|              |                |                                                      |
|--------------|----------------|------------------------------------------------------|
| 8:21665306   | <i>BIN3</i>    | REACTOME_RET_SIGNALING                               |
| 8:21668901   | <i>BIN3</i>    | REACTOME_RET_SIGNALING                               |
| 1:155975202  | <i>GBAP1</i>   | REACTOME_RHO_GTPASE_CYCLE                            |
| 1:161035780  | <i>FCGR2A</i>  | REACTOME_RHO_GTPASE_CYCLE                            |
| 3:49406095   | <i>IP6K2</i>   | REACTOME_RHO_GTPASE_CYCLE                            |
| 3:49424231   | <i>IP6K2</i>   | REACTOME_RHO_GTPASE_CYCLE                            |
| 3:49450137   | <i>IP6K2</i>   | REACTOME_RHO_GTPASE_CYCLE                            |
| 4:89711319   | <i>SNCA_2</i>  | REACTOME_RHO_GTPASE_CYCLE                            |
| 4:89740128   | <i>SNCA_2</i>  | REACTOME_RHO_GTPASE_CYCLE                            |
| 4:90002389   | <i>SNCA_2</i>  | REACTOME_RHO_GTPASE_CYCLE                            |
| 5:59958372   | <i>ELOVL7</i>  | REACTOME_RHO_GTPASE_CYCLE                            |
| 17:43472507  | <i>CRHR1_2</i> | REACTOME_RHO_GTPASE_CYCLE                            |
| 3:49406095   | <i>IP6K2</i>   | REACTOME_RHO_GTPASE_EFFECTORS                        |
| 3:49424231   | <i>IP6K2</i>   | REACTOME_RHO_GTPASE_EFFECTORS                        |
| 3:49450137   | <i>IP6K2</i>   | REACTOME_RHO_GTPASE_EFFECTORS                        |
| 12:122816734 | <i>HIP1R</i>   | REACTOME_RHO_GTPASE_EFFECTORS                        |
| 12:122817580 | <i>HIP1R</i>   | REACTOME_RHO_GTPASE_EFFECTORS                        |
| 12:122853197 | <i>HIP1R</i>   | REACTOME_RHO_GTPASE_EFFECTORS                        |
| 12:123057792 | <i>HIP1R</i>   | REACTOME_RHO_GTPASE_EFFECTORS                        |
| 12:123110365 | <i>HIP1R</i>   | REACTOME_RHO_GTPASE_EFFECTORS                        |
| 12:123110785 | <i>HIP1R</i>   | REACTOME_RHO_GTPASE_EFFECTORS                        |
| 17:7101771   | <i>V1NB1</i>   | REACTOME_RHO_GTPASE_EFFECTORS                        |
| 17:7129974   | <i>V1NB1</i>   | REACTOME_RHO_GTPASE_EFFECTORS                        |
| 17:43302259  | <i>CRHR1_2</i> | REACTOME_RHO_GTPASE_EFFECTORS                        |
| 3:49406095   | <i>IP6K2</i>   | REACTOME_RHO_GTPASES_ACTIVATE_CIT                    |
| 3:49424231   | <i>IP6K2</i>   | REACTOME_RHO_GTPASES_ACTIVATE_CIT                    |
| 3:49450137   | <i>IP6K2</i>   | REACTOME_RHO_GTPASES_ACTIVATE_CIT                    |
| 17:7101771   | <i>V1NB1</i>   | REACTOME_RHO_GTPASES_ACTIVATE_CIT                    |
| 3:49406095   | <i>IP6K2</i>   | REACTOME_RHO_GTPASES_ACTIVATE_FORMINS                |
| 3:49424231   | <i>IP6K2</i>   | REACTOME_RHO_GTPASES_ACTIVATE_FORMINS                |
| 3:49450137   | <i>IP6K2</i>   | REACTOME_RHO_GTPASES_ACTIVATE_FORMINS                |
| 12:122816734 | <i>HIP1R</i>   | REACTOME_RHO_GTPASES_ACTIVATE_FORMINS                |
| 12:122817580 | <i>HIP1R</i>   | REACTOME_RHO_GTPASES_ACTIVATE_FORMINS                |
| 12:122853197 | <i>HIP1R</i>   | REACTOME_RHO_GTPASES_ACTIVATE_FORMINS                |
| 12:123057792 | <i>HIP1R</i>   | REACTOME_RHO_GTPASES_ACTIVATE_FORMINS                |
| 12:123110365 | <i>HIP1R</i>   | REACTOME_RHO_GTPASES_ACTIVATE_FORMINS                |
| 12:123110785 | <i>HIP1R</i>   | REACTOME_RHO_GTPASES_ACTIVATE_FORMINS                |
| 17:7129974   | <i>V1NB1</i>   | REACTOME_RHO_GTPASES_ACTIVATE_FORMINS                |
| 17:43302259  | <i>CRHR1_2</i> | REACTOME_RHO_GTPASES_ACTIVATE_FORMINS                |
| 12:122816734 | <i>HIP1R</i>   | REACTOME_RHO_GTPASES_ACTIVATE_IQGAPS                 |
| 12:122817580 | <i>HIP1R</i>   | REACTOME_RHO_GTPASES_ACTIVATE_IQGAPS                 |
| 12:122853197 | <i>HIP1R</i>   | REACTOME_RHO_GTPASES_ACTIVATE_IQGAPS                 |
| 3:49406095   | <i>IP6K2</i>   | REACTOME_RHO_GTPASES_ACTIVATE_KTN1                   |
| 3:49424231   | <i>IP6K2</i>   | REACTOME_RHO_GTPASES_ACTIVATE_KTN1                   |
| 3:49450137   | <i>IP6K2</i>   | REACTOME_RHO_GTPASES_ACTIVATE_KTN1                   |
| 3:49406095   | <i>IP6K2</i>   | REACTOME_RHO_GTPASES_ACTIVATE_PKNS                   |
| 3:49424231   | <i>IP6K2</i>   | REACTOME_RHO_GTPASES_ACTIVATE_PKNS                   |
| 3:49450137   | <i>IP6K2</i>   | REACTOME_RHO_GTPASES_ACTIVATE_PKNS                   |
| 3:49406095   | <i>IP6K2</i>   | REACTOME_RHO_GTPASES_ACTIVATE_RHOTEKIN_AND_RHOPILINS |
| 3:49424231   | <i>IP6K2</i>   | REACTOME_RHO_GTPASES_ACTIVATE_RHOTEKIN_AND_RHOPILINS |
| 3:49450137   | <i>IP6K2</i>   | REACTOME_RHO_GTPASES_ACTIVATE_RHOTEKIN_AND_RHOPILINS |
| 3:49406095   | <i>IP6K2</i>   | REACTOME_RHO_GTPASES_ACTIVATE_ROCKS                  |
| 3:49424231   | <i>IP6K2</i>   | REACTOME_RHO_GTPASES_ACTIVATE_ROCKS                  |

|              |                 |                                                                                              |
|--------------|-----------------|----------------------------------------------------------------------------------------------|
| 3:49450137   | <i>IP6K2</i>    | REACTOME_RHO_GTPASES_ACTIVATE_ROCKS                                                          |
| 12:46134812  | <i>SCAF11</i>   | REACTOME_RMTS_METHYLATE_HISTONE_ARGININES                                                    |
| 2:135708115  | <i>TMEM163</i>  | REACTOME_RNA_POLYMERASE_II_PRE_TRANSCRIPTION_EVENTS                                          |
| 6:31925679   | <i>HLA-DRB5</i> | REACTOME_RNA_POLYMERASE_II_PRE_TRANSCRIPTION_EVENTS                                          |
| 2:135708115  | <i>TMEM163</i>  | REACTOME_RNA_POLYMERASE_II_TRANSCRIBES_SNRNA_GENES                                           |
| 11:82886475  | <i>DLG2</i>     | REACTOME_RNA_POLYMERASE_II_TRANSCRIBES_SNRNA_GENES                                           |
| 2:135708115  | <i>TMEM163</i>  | REACTOME_RNA_POLYMERASE_II_TRANSCRIPTION_ELONGATION                                          |
| 6:31925679   | <i>HLA-DRB5</i> | REACTOME_RNA_POLYMERASE_II_TRANSCRIPTION_ELONGATION                                          |
| 11:82886475  | <i>DLG2</i>     | REACTOME_RNA_POLYMERASE_II_TRANSCRIPTION_TERMINATION                                         |
| 6:31862876   | <i>HLA-DRB5</i> | REACTOME_RNA_POLYMERASE_I_TRANSCRIPTION_INITIATION                                           |
| 6:31862876   | <i>HLA-DRB5</i> | REACTOME_RNA_POLYMERASE_I_TRANSCRIPTION                                                      |
| 3:48835245   | <i>IP6K2</i>    | REACTOME_ROBO_RECEPTORS_BIND_AKAP5                                                           |
| 6:112009427  | <i>FYN</i>      | REACTOME_ROLE_OF_LAT2_NTAL_LAB_ON_CALCIUM_MOBILIZATION                                       |
| 6:112056759  | <i>FYN</i>      | REACTOME_ROLE_OF_LAT2_NTAL_LAB_ON_CALCIUM_MOBILIZATION                                       |
| 6:112151452  | <i>FYN</i>      | REACTOME_ROLE_OF_LAT2_NTAL_LAB_ON_CALCIUM_MOBILIZATION                                       |
| 15:61293467  | <i>VPS13C</i>   | REACTOME_RORA_ACTIVATES_GENE_EXPRESSION                                                      |
| 12:124219791 | <i>HIP1R</i>    | REACTOME_ROS_AND_RNS_PRODUCTION_IN_PHAGOCYTES                                                |
| 6:33252561   | <i>HLA-DRB5</i> | REACTOME_RRNA_MODIFICATION_IN_THE_NUCLEUS_AND_CYTOSOL                                        |
| 6:33252561   | <i>HLA-DRB5</i> | REACTOME_RRNA_PROCESSING_IN_THE_NUCLEUS_AND_CYTOSOL                                          |
| 6:33252561   | <i>HLA-DRB5</i> | REACTOME_RRNA_PROCESSING                                                                     |
| 12:46134812  | <i>SCAF11</i>   | REACTOME_RUNX1_INTERACTS_WITH_CO_FACTORS_WHOSE_PRECISE_EFFECT_ON_RUNX1_TARGETS_IS_NOT_KNOWN  |
| 8:11381148   | <i>CTSB</i>     | REACTOME_RUNX1_REGULATES_TRANSCRIPTION_OF_GENES_INVOLVED_IN_BCR_SIGNALING                    |
| 6:32814942   | <i>HLA-DRB5</i> | REACTOME_RUNX1_REGULATES_TRANSCRIPTION_OF_GENES_INVOLVED_IN_DIFFERENTIATION_OF_HSCS          |
| 14:55515304  | <i>GCH1</i>     | REACTOME_RUNX1_REGULATES_TRANSCRIPTION_OF_GENES_INVOLVED_IN_DIFFERENTIATION_OF KERATINOCYTES |
| 17:7578671   | <i>V1NB1</i>    | REACTOME_RUNX3_REGULATES_CDKN1A_TRANSCRIPTION                                                |
| 16:30510571  | <i>SETD1A</i>   | REACTOME_RUNX3_REGULATES_IMMUNE_RESPONSE_AND_CELL_MIGRATION                                  |
| 16:30516492  | <i>SETD1A</i>   | REACTOME_RUNX3_REGULATES_IMMUNE_RESPONSE_AND_CELL_MIGRATION                                  |
| 16:30520856  | <i>SETD1A</i>   | REACTOME_RUNX3_REGULATES_IMMUNE_RESPONSE_AND_CELL_MIGRATION                                  |
| 6:32941506   | <i>HLA-DRB5</i> | REACTOME_RUNX3_REGULATES_P14_ARF                                                             |
| 6:32814942   | <i>HLA-DRB5</i> | REACTOME_SCF_SKP2_MEDIATED_DEGRADATION_OF_P27_P21                                            |
| 6:112009427  | <i>FYN</i>      | REACTOME_SEMA3A_PAK_DEPENDENT_AXON_REPULSION                                                 |
| 6:112056759  | <i>FYN</i>      | REACTOME_SEMA3A_PAK_DEPENDENT_AXON_REPULSION                                                 |
| 6:112151452  | <i>FYN</i>      | REACTOME_SEMA3A_PAK_DEPENDENT_AXON_REPULSION                                                 |
| 6:112009427  | <i>FYN</i>      | REACTOME_SEMA3A_PLEXIN_REPULSION_SIGNALING_BY_INHIBITING_INTEGRIN_ADHESION                   |
| 6:112056759  | <i>FYN</i>      | REACTOME_SEMA3A_PLEXIN_REPULSION_SIGNALING_BY_INHIBITING_INTEGRIN_ADHESION                   |
| 6:112151452  | <i>FYN</i>      | REACTOME_SEMA3A_PLEXIN_REPULSION_SIGNALING_BY_INHIBITING_INTEGRIN_ADHESION                   |
| 3:49406095   | <i>IP6K2</i>    | REACTOME_SEMA4D_INDUCED_CELL_MIGRATION_AND_GROWTH_CONE_COLLAPSE                              |
| 3:49424231   | <i>IP6K2</i>    | REACTOME_SEMA4D_INDUCED_CELL_MIGRATION_AND_GROWTH_CONE_COLLAPSE                              |
| 3:49450137   | <i>IP6K2</i>    | REACTOME_SEMA4D_INDUCED_CELL_MIGRATION_AND_GROWTH_CONE_COLLAPSE                              |
| 3:49406095   | <i>IP6K2</i>    | REACTOME_SEMA4D_IN_SEMAPHORIN_SIGNALING                                                      |
| 3:49424231   | <i>IP6K2</i>    | REACTOME_SEMA4D_IN_SEMAPHORIN_SIGNALING                                                      |
| 3:49450137   | <i>IP6K2</i>    | REACTOME_SEMA4D_IN_SEMAPHORIN_SIGNALING                                                      |
| 3:49406095   | <i>IP6K2</i>    | REACTOME_SEMA4D_MEDIATED_INHIBITION_OF_CELL_ATTACHMENT_AND_MIGRATION                         |
| 3:49424231   | <i>IP6K2</i>    | REACTOME_SEMA4D_MEDIATED_INHIBITION_OF_CELL_ATTACHMENT_AND_MIGRATION                         |
| 3:49450137   | <i>IP6K2</i>    | REACTOME_SEMA4D_MEDIATED_INHIBITION_OF_CELL_ATTACHMENT_AND_MIGRATION                         |
| 3:49406095   | <i>IP6K2</i>    | REACTOME_SEMAPHORIN_INTERACTIONS                                                             |
| 3:49424231   | <i>IP6K2</i>    | REACTOME_SEMAPHORIN_INTERACTIONS                                                             |
| 3:49450137   | <i>IP6K2</i>    | REACTOME_SEMAPHORIN_INTERACTIONS                                                             |
| 6:112009427  | <i>FYN</i>      | REACTOME_SEMAPHORIN_INTERACTIONS                                                             |
| 6:112056759  | <i>FYN</i>      | REACTOME_SEMAPHORIN_INTERACTIONS                                                             |
| 6:112151452  | <i>FYN</i>      | REACTOME_SEMAPHORIN_INTERACTIONS                                                             |
| 6:31862876   | <i>HLA-DRB5</i> | REACTOME_SENESCENCE_ASSOCIATED_SECRETORY_PHENOTYPE_SASP                                      |
| 17:45215865  | <i>WNT3</i>     | REACTOME_SENESCENCE_ASSOCIATED_SECRETORY_PHENOTYPE_SASP                                      |

|              |                 |                                                         |
|--------------|-----------------|---------------------------------------------------------|
| 17:45244822  | <i>WNT3</i>     | REACTOME_SENESCENCE_ASSOCIATED_SECRETORY_PHENOTYPE_SASP |
| 3:151090424  | <i>MED12L</i>   | REACTOME_SIGNAL_AMPLIFICATION                           |
| 3:151099733  | <i>MED12L</i>   | REACTOME_SIGNAL_AMPLIFICATION                           |
| 19:3156505   | <i>SPPL2B</i>   | REACTOME_SIGNAL_AMPLIFICATION                           |
| 19:2251817   | <i>SPPL2B</i>   | REACTOME_SIGNALING_BY_BMP                               |
| 1:156059276  | <i>GBAP1</i>    | REACTOME_SIGNALING_BY_BRAF_AND_RAF_FUSIONS              |
| 4:114424939  | <i>CAMK2D</i>   | REACTOME_SIGNALING_BY_BRAF_AND_RAF_FUSIONS              |
| 17:40392358  | <i>RETREG3</i>  | REACTOME_SIGNALING_BY_CYTOSOLIC_FGFR1_FUSION_MUTANTS    |
| 9:17579690   | <i>SH3GL2_2</i> | REACTOME_SIGNALING_BY_EGFR                              |
| 9:17609302   | <i>SH3GL2_2</i> | REACTOME_SIGNALING_BY_EGFR                              |
| 9:17627444   | <i>SH3GL2_2</i> | REACTOME_SIGNALING_BY_EGFR                              |
| 9:17710876   | <i>SH3GL2_2</i> | REACTOME_SIGNALING_BY_EGFR                              |
| 9:17732590   | <i>SH3GL2_2</i> | REACTOME_SIGNALING_BY_EGFR                              |
| 9:17737514   | <i>SH3GL2_2</i> | REACTOME_SIGNALING_BY_EGFR                              |
| 9:17758945   | <i>SH3GL2_2</i> | REACTOME_SIGNALING_BY_EGFR                              |
| 3:49406095   | <i>IP6K2</i>    | REACTOME_SIGNALING_BY_ERBB2                             |
| 3:49424231   | <i>IP6K2</i>    | REACTOME_SIGNALING_BY_ERBB2                             |
| 3:49450137   | <i>IP6K2</i>    | REACTOME_SIGNALING_BY_ERBB2                             |
| 6:112009427  | <i>FYN</i>      | REACTOME_SIGNALING_BY_ERBB2                             |
| 6:112056759  | <i>FYN</i>      | REACTOME_SIGNALING_BY_ERBB2                             |
| 6:112151452  | <i>FYN</i>      | REACTOME_SIGNALING_BY_ERBB2                             |
| 1:227067656  | <i>ITPKB</i>    | REACTOME_SIGNALING_BY_ERBB4                             |
| 17:7101771   | <i>V1NB1</i>    | REACTOME_SIGNALING_BY_ERBB4                             |
| 17:40392358  | <i>RETREG3</i>  | REACTOME_SIGNALING_BY_ERYTHROPOIETIN                    |
| 17:40392358  | <i>RETREG3</i>  | REACTOME_SIGNALING_BY_FGFR1_IN_DISEASE                  |
| 17:40392358  | <i>RETREG3</i>  | REACTOME_SIGNALING_BY_FGFR_IN_DISEASE                   |
| 1:155975202  | <i>GBAP1</i>    | REACTOME_SIGNALING_BY_GPCR                              |
| 2:169999639  | <i>STK39</i>    | REACTOME_SIGNALING_BY_GPCR                              |
| 2:170028024  | <i>STK39</i>    | REACTOME_SIGNALING_BY_GPCR                              |
| 3:48835245   | <i>IP6K2</i>    | REACTOME_SIGNALING_BY_GPCR                              |
| 3:49406095   | <i>IP6K2</i>    | REACTOME_SIGNALING_BY_GPCR                              |
| 3:49424231   | <i>IP6K2</i>    | REACTOME_SIGNALING_BY_GPCR                              |
| 3:49450137   | <i>IP6K2</i>    | REACTOME_SIGNALING_BY_GPCR                              |
| 3:123057397  | <i>KPNA1</i>    | REACTOME_SIGNALING_BY_GPCR                              |
| 3:151090424  | <i>MED12L</i>   | REACTOME_SIGNALING_BY_GPCR                              |
| 3:151099733  | <i>MED12L</i>   | REACTOME_SIGNALING_BY_GPCR                              |
| 3:151599393  | <i>MED12L</i>   | REACTOME_SIGNALING_BY_GPCR                              |
| 4:114424939  | <i>CAMK2D</i>   | REACTOME_SIGNALING_BY_GPCR                              |
| 5:59236972   | <i>ELOVL7</i>   | REACTOME_SIGNALING_BY_GPCR                              |
| 5:59665659   | <i>ELOVL7</i>   | REACTOME_SIGNALING_BY_GPCR                              |
| 5:59705316   | <i>ELOVL7</i>   | REACTOME_SIGNALING_BY_GPCR                              |
| 5:59736085   | <i>ELOVL7</i>   | REACTOME_SIGNALING_BY_GPCR                              |
| 6:29407378   | <i>TRIM40</i>   | REACTOME_SIGNALING_BY_GPCR                              |
| 6:29412222   | <i>TRIM40</i>   | REACTOME_SIGNALING_BY_GPCR                              |
| 6:29579544   | <i>TRIM40</i>   | REACTOME_SIGNALING_BY_GPCR                              |
| 10:15199347  | <i>ITGA8</i>    | REACTOME_SIGNALING_BY_GPCR                              |
| 10:121114292 | <i>INPP5F</i>   | REACTOME_SIGNALING_BY_GPCR                              |
| 10:121138071 | <i>INPP5F</i>   | REACTOME_SIGNALING_BY_GPCR                              |
| 10:121191186 | <i>INPP5F</i>   | REACTOME_SIGNALING_BY_GPCR                              |
| 10:121295884 | <i>INPP5F</i>   | REACTOME_SIGNALING_BY_GPCR                              |
| 14:88472612  | <i>GALC</i>     | REACTOME_SIGNALING_BY_GPCR                              |
| 17:43132290  | <i>CRHR1_2</i>  | REACTOME_SIGNALING_BY_GPCR                              |
| 17:43744203  | <i>CRHR1_2</i>  | REACTOME_SIGNALING_BY_GPCR                              |

|              |                 |                                        |
|--------------|-----------------|----------------------------------------|
| 17:43748712  | <i>CRHR1_2</i>  | REACTOME_SIGNALING_BY_GPCR             |
| 17:43767804  | <i>CRHR1_2</i>  | REACTOME_SIGNALING_BY_GPCR             |
| 17:43784228  | <i>CRHR1_2</i>  | REACTOME_SIGNALING_BY_GPCR             |
| 17:43791502  | <i>CRHR1_2</i>  | REACTOME_SIGNALING_BY_GPCR             |
| 17:43843861  | <i>CRHR1_2</i>  | REACTOME_SIGNALING_BY_GPCR             |
| 17:43847503  | <i>CRHR1_2</i>  | REACTOME_SIGNALING_BY_GPCR             |
| 17:44843651  | <i>WNT3</i>     | REACTOME_SIGNALING_BY_GPCR             |
| 17:44888209  | <i>WNT3</i>     | REACTOME_SIGNALING_BY_GPCR             |
| 17:44888715  | <i>WNT3</i>     | REACTOME_SIGNALING_BY_GPCR             |
| 17:44906949  | <i>WNT3</i>     | REACTOME_SIGNALING_BY_GPCR             |
| 17:44912901  | <i>WNT3</i>     | REACTOME_SIGNALING_BY_GPCR             |
| 17:44931399  | <i>WNT3</i>     | REACTOME_SIGNALING_BY_GPCR             |
| 17:44947756  | <i>WNT3</i>     | REACTOME_SIGNALING_BY_GPCR             |
| 19:3156505   | <i>SPPL2B</i>   | REACTOME_SIGNALING_BY_GPCR             |
| 3:48835245   | <i>IP6K2</i>    | REACTOME_SIGNALING_BY_HEDGEHOG         |
| 3:123057397  | <i>KPNA1</i>    | REACTOME_SIGNALING_BY_HEDGEHOG         |
| 6:32814942   | <i>HLA-DRB5</i> | REACTOME_SIGNALING_BY_HEDGEHOG         |
| 10:103185542 | <i>GBF1</i>     | REACTOME_SIGNALING_BY_HEDGEHOG         |
| 10:103308244 | <i>GBF1</i>     | REACTOME_SIGNALING_BY_HEDGEHOG         |
| 10:104285824 | <i>GBF1</i>     | REACTOME_SIGNALING_BY_HEDGEHOG         |
| 17:7129974   | <i>V1NB1</i>    | REACTOME_SIGNALING_BY_HIPPO            |
| 12:124219791 | <i>HIP1R</i>    | REACTOME_SIGNALING_BY_INSULIN_RECEPTOR |
| 2:102609356  | <i>MAP4K4</i>   | REACTOME_SIGNALING_BY_INTERLEUKINS     |
| 2:102636759  | <i>MAP4K4</i>   | REACTOME_SIGNALING_BY_INTERLEUKINS     |
| 2:103063855  | <i>MAP4K4</i>   | REACTOME_SIGNALING_BY_INTERLEUKINS     |
| 4:114424939  | <i>CAMK2D</i>   | REACTOME_SIGNALING_BY_INTERLEUKINS     |
| 6:32151443   | <i>HLA-DRB5</i> | REACTOME_SIGNALING_BY_INTERLEUKINS     |
| 6:32814942   | <i>HLA-DRB5</i> | REACTOME_SIGNALING_BY_INTERLEUKINS     |
| 6:112009427  | <i>FYN</i>      | REACTOME_SIGNALING_BY_INTERLEUKINS     |
| 6:112056759  | <i>FYN</i>      | REACTOME_SIGNALING_BY_INTERLEUKINS     |
| 6:112151452  | <i>FYN</i>      | REACTOME_SIGNALING_BY_INTERLEUKINS     |
| 8:21665306   | <i>BIN3</i>     | REACTOME_SIGNALING_BY_INTERLEUKINS     |
| 8:21668901   | <i>BIN3</i>     | REACTOME_SIGNALING_BY_INTERLEUKINS     |
| 10:103185542 | <i>GBF1</i>     | REACTOME_SIGNALING_BY_INTERLEUKINS     |
| 10:103308244 | <i>GBF1</i>     | REACTOME_SIGNALING_BY_INTERLEUKINS     |
| 11:83188607  | <i>DLG2</i>     | REACTOME_SIGNALING_BY_INTERLEUKINS     |
| 11:83219006  | <i>DLG2</i>     | REACTOME_SIGNALING_BY_INTERLEUKINS     |
| 11:83538733  | <i>DLG2</i>     | REACTOME_SIGNALING_BY_INTERLEUKINS     |
| 11:83544472  | <i>DLG2</i>     | REACTOME_SIGNALING_BY_INTERLEUKINS     |
| 11:83656201  | <i>DLG2</i>     | REACTOME_SIGNALING_BY_INTERLEUKINS     |
| 11:83700228  | <i>DLG2</i>     | REACTOME_SIGNALING_BY_INTERLEUKINS     |
| 11:83762918  | <i>DLG2</i>     | REACTOME_SIGNALING_BY_INTERLEUKINS     |
| 11:83894247  | <i>DLG2</i>     | REACTOME_SIGNALING_BY_INTERLEUKINS     |
| 11:84021037  | <i>DLG2</i>     | REACTOME_SIGNALING_BY_INTERLEUKINS     |
| 11:84324361  | <i>DLG2</i>     | REACTOME_SIGNALING_BY_INTERLEUKINS     |
| 11:84373496  | <i>DLG2</i>     | REACTOME_SIGNALING_BY_INTERLEUKINS     |
| 11:84403409  | <i>DLG2</i>     | REACTOME_SIGNALING_BY_INTERLEUKINS     |
| 15:61293467  | <i>VPS13C</i>   | REACTOME_SIGNALING_BY_INTERLEUKINS     |
| 16:31370452  | <i>SETD1A</i>   | REACTOME_SIGNALING_BY_INTERLEUKINS     |
| 16:50730088  | <i>CASC16</i>   | REACTOME_SIGNALING_BY_INTERLEUKINS     |
| 16:50730446  | <i>CASC16</i>   | REACTOME_SIGNALING_BY_INTERLEUKINS     |
| 16:50745926  | <i>CASC16</i>   | REACTOME_SIGNALING_BY_INTERLEUKINS     |
| 17:7101771   | <i>V1NB1</i>    | REACTOME_SIGNALING_BY_INTERLEUKINS     |

|             |          |                                                             |
|-------------|----------|-------------------------------------------------------------|
| 17:7578671  | V1NB1    | REACTOME_SIGNALING_BY_INTERLEUKINS                          |
| 17:40392358 | RETREG3  | REACTOME_SIGNALING_BY_INTERLEUKINS                          |
| 17:40392358 | RETREG3  | REACTOME_SIGNALING_BY_LEPTIN                                |
| 3:49162284  | IP6K2    | REACTOME_SIGNALING_BY_MET                                   |
| 3:49162583  | IP6K2    | REACTOME_SIGNALING_BY_MET                                   |
| 6:33153528  | HLA-DRB5 | REACTOME_SIGNALING_BY_MET                                   |
| 6:112561154 | FYN      | REACTOME_SIGNALING_BY_MET                                   |
| 9:17579690  | SH3GL2_2 | REACTOME_SIGNALING_BY_MET                                   |
| 9:17609302  | SH3GL2_2 | REACTOME_SIGNALING_BY_MET                                   |
| 9:17627444  | SH3GL2_2 | REACTOME_SIGNALING_BY_MET                                   |
| 9:17710876  | SH3GL2_2 | REACTOME_SIGNALING_BY_MET                                   |
| 9:17732590  | SH3GL2_2 | REACTOME_SIGNALING_BY_MET                                   |
| 9:17737514  | SH3GL2_2 | REACTOME_SIGNALING_BY_MET                                   |
| 9:17758945  | SH3GL2_2 | REACTOME_SIGNALING_BY_MET                                   |
| 4:114424939 | CAMK2D   | REACTOME_SIGNALING_BY_MODERATE_KINASE_ACTIVITY_BRAF_MUTANTS |
| 3:49406095  | IP6K2    | REACTOME_SIGNALING_BY_NON_RECEPTOR_TYROSINE_KINASES         |
| 3:49424231  | IP6K2    | REACTOME_SIGNALING_BY_NON_RECEPTOR_TYROSINE_KINASES         |
| 3:49450137  | IP6K2    | REACTOME_SIGNALING_BY_NON_RECEPTOR_TYROSINE_KINASES         |
| 7:23277372  | GPNMB    | REACTOME_SIGNALING_BY_NON_RECEPTOR_TYROSINE_KINASES         |
| 7:23293746  | GPNMB    | REACTOME_SIGNALING_BY_NON_RECEPTOR_TYROSINE_KINASES         |
| 7:23313171  | GPNMB    | REACTOME_SIGNALING_BY_NON_RECEPTOR_TYROSINE_KINASES         |
| 12:40614434 | LRRK2_2  | REACTOME_SIGNALING_BY_NON_RECEPTOR_TYROSINE_KINASES         |
| 12:40614656 | LRRK2_2  | REACTOME_SIGNALING_BY_NON_RECEPTOR_TYROSINE_KINASES         |
| 12:40617231 | LRRK2_2  | REACTOME_SIGNALING_BY_NON_RECEPTOR_TYROSINE_KINASES         |
| 12:40653993 | LRRK2_2  | REACTOME_SIGNALING_BY_NON_RECEPTOR_TYROSINE_KINASES         |
| 12:40698422 | LRRK2_2  | REACTOME_SIGNALING_BY_NON_RECEPTOR_TYROSINE_KINASES         |
| 12:40707861 | LRRK2_2  | REACTOME_SIGNALING_BY_NON_RECEPTOR_TYROSINE_KINASES         |
| 12:40753796 | LRRK2_2  | REACTOME_SIGNALING_BY_NON_RECEPTOR_TYROSINE_KINASES         |
| 1:227067656 | ITPKB    | REACTOME_SIGNALING_BY_NOTCH1_IN_CANCER                      |
| 1:227067656 | ITPKB    | REACTOME_SIGNALING_BY_NOTCH1                                |
| 12:41147295 | LRRK2_2  | REACTOME_SIGNALING_BY_NOTCH1                                |
| 12:41251554 | LRRK2_2  | REACTOME_SIGNALING_BY_NOTCH1                                |
| 12:41407403 | LRRK2_2  | REACTOME_SIGNALING_BY_NOTCH1                                |
| 19:3022354  | SPPL2B   | REACTOME_SIGNALING_BY_NOTCH1                                |
| 19:3036350  | SPPL2B   | REACTOME_SIGNALING_BY_NOTCH1                                |
| 1:227067656 | ITPKB    | REACTOME_SIGNALING_BY_NOTCH2                                |
| 12:41147295 | LRRK2_2  | REACTOME_SIGNALING_BY_NOTCH2                                |
| 12:41251554 | LRRK2_2  | REACTOME_SIGNALING_BY_NOTCH2                                |
| 12:41407403 | LRRK2_2  | REACTOME_SIGNALING_BY_NOTCH2                                |
| 1:227067656 | ITPKB    | REACTOME_SIGNALING_BY_NOTCH3                                |
| 1:227067656 | ITPKB    | REACTOME_SIGNALING_BY_NOTCH4                                |
| 6:32186193  | HLA-DRB5 | REACTOME_SIGNALING_BY_NOTCH4                                |
| 6:32814942  | HLA-DRB5 | REACTOME_SIGNALING_BY_NOTCH4                                |
| 1:227067656 | ITPKB    | REACTOME_SIGNALING_BY_NOTCH                                 |
| 6:32186193  | HLA-DRB5 | REACTOME_SIGNALING_BY_NOTCH                                 |
| 6:32814942  | HLA-DRB5 | REACTOME_SIGNALING_BY_NOTCH                                 |
| 12:41147295 | LRRK2_2  | REACTOME_SIGNALING_BY_NOTCH                                 |
| 12:41251554 | LRRK2_2  | REACTOME_SIGNALING_BY_NOTCH                                 |
| 12:41407403 | LRRK2_2  | REACTOME_SIGNALING_BY_NOTCH                                 |
| 17:7578671  | V1NB1    | REACTOME_SIGNALING_BY_NOTCH                                 |
| 19:3022354  | SPPL2B   | REACTOME_SIGNALING_BY_NOTCH                                 |
| 19:3036350  | SPPL2B   | REACTOME_SIGNALING_BY_NOTCH                                 |
| 1:171945488 | VAMP4    | REACTOME_SIGNALING_BY_NTRK1_TRKA                            |

|             |          |                                                 |
|-------------|----------|-------------------------------------------------|
| 1:172137119 | VAMP4    | REACTOME_SIGNALING_BY_NTRK1_TRKA                |
| 1:172386261 | VAMP4    | REACTOME_SIGNALING_BY_NTRK1_TRKA                |
| 3:49406095  | IP6K2    | REACTOME_SIGNALING_BY_NTRK1_TRKA                |
| 3:49424231  | IP6K2    | REACTOME_SIGNALING_BY_NTRK1_TRKA                |
| 3:49450137  | IP6K2    | REACTOME_SIGNALING_BY_NTRK1_TRKA                |
| 9:17579690  | SH3GL2_2 | REACTOME_SIGNALING_BY_NTRK1_TRKA                |
| 9:17609302  | SH3GL2_2 | REACTOME_SIGNALING_BY_NTRK1_TRKA                |
| 9:17627444  | SH3GL2_2 | REACTOME_SIGNALING_BY_NTRK1_TRKA                |
| 9:17710876  | SH3GL2_2 | REACTOME_SIGNALING_BY_NTRK1_TRKA                |
| 9:17732590  | SH3GL2_2 | REACTOME_SIGNALING_BY_NTRK1_TRKA                |
| 9:17737514  | SH3GL2_2 | REACTOME_SIGNALING_BY_NTRK1_TRKA                |
| 9:17758945  | SH3GL2_2 | REACTOME_SIGNALING_BY_NTRK1_TRKA                |
| 18:40543738 | RIT2     | REACTOME_SIGNALING_BY_NTRK1_TRKA                |
| 18:40596271 | RIT2     | REACTOME_SIGNALING_BY_NTRK1_TRKA                |
| 18:40612823 | RIT2     | REACTOME_SIGNALING_BY_NTRK1_TRKA                |
| 18:40649778 | RIT2     | REACTOME_SIGNALING_BY_NTRK1_TRKA                |
| 18:40673380 | RIT2     | REACTOME_SIGNALING_BY_NTRK1_TRKA                |
| 6:112009427 | FYN      | REACTOME_SIGNALING_BY_NTRK2_TRKB                |
| 6:112056759 | FYN      | REACTOME_SIGNALING_BY_NTRK2_TRKB                |
| 6:112151452 | FYN      | REACTOME_SIGNALING_BY_NTRK2_TRKB                |
| 1:171945488 | VAMP4    | REACTOME_SIGNALING_BY_NTRKS                     |
| 1:172137119 | VAMP4    | REACTOME_SIGNALING_BY_NTRKS                     |
| 1:172386261 | VAMP4    | REACTOME_SIGNALING_BY_NTRKS                     |
| 3:49406095  | IP6K2    | REACTOME_SIGNALING_BY_NTRKS                     |
| 3:49424231  | IP6K2    | REACTOME_SIGNALING_BY_NTRKS                     |
| 3:49450137  | IP6K2    | REACTOME_SIGNALING_BY_NTRKS                     |
| 6:112009427 | FYN      | REACTOME_SIGNALING_BY_NTRKS                     |
| 6:112056759 | FYN      | REACTOME_SIGNALING_BY_NTRKS                     |
| 6:112151452 | FYN      | REACTOME_SIGNALING_BY_NTRKS                     |
| 9:17579690  | SH3GL2_2 | REACTOME_SIGNALING_BY_NTRKS                     |
| 9:17609302  | SH3GL2_2 | REACTOME_SIGNALING_BY_NTRKS                     |
| 9:17627444  | SH3GL2_2 | REACTOME_SIGNALING_BY_NTRKS                     |
| 9:17710876  | SH3GL2_2 | REACTOME_SIGNALING_BY_NTRKS                     |
| 9:17732590  | SH3GL2_2 | REACTOME_SIGNALING_BY_NTRKS                     |
| 9:17737514  | SH3GL2_2 | REACTOME_SIGNALING_BY_NTRKS                     |
| 9:17758945  | SH3GL2_2 | REACTOME_SIGNALING_BY_NTRKS                     |
| 18:40543738 | RIT2     | REACTOME_SIGNALING_BY_NTRKS                     |
| 18:40596271 | RIT2     | REACTOME_SIGNALING_BY_NTRKS                     |
| 18:40612823 | RIT2     | REACTOME_SIGNALING_BY_NTRKS                     |
| 18:40649778 | RIT2     | REACTOME_SIGNALING_BY_NTRKS                     |
| 18:40673380 | RIT2     | REACTOME_SIGNALING_BY_NTRKS                     |
| 14:38061742 | MIPOL1   | REACTOME_SIGNALING_BY_NUCLEAR_RECEPTORS         |
| 17:40392358 | RETREG3  | REACTOME_SIGNALING_BY_PDGF                      |
| 4:114424939 | CAMK2D   | REACTOME_SIGNALING_BY_RAS_MUTANTS               |
| 1:171945488 | VAMP4    | REACTOME_SIGNALING_BY_RECEPTOR_TYROSINE_KINASES |
| 1:172137119 | VAMP4    | REACTOME_SIGNALING_BY_RECEPTOR_TYROSINE_KINASES |
| 1:172386261 | VAMP4    | REACTOME_SIGNALING_BY_RECEPTOR_TYROSINE_KINASES |
| 1:227067656 | ITPKB    | REACTOME_SIGNALING_BY_RECEPTOR_TYROSINE_KINASES |
| 3:49162284  | IP6K2    | REACTOME_SIGNALING_BY_RECEPTOR_TYROSINE_KINASES |
| 3:49162583  | IP6K2    | REACTOME_SIGNALING_BY_RECEPTOR_TYROSINE_KINASES |
| 3:49406095  | IP6K2    | REACTOME_SIGNALING_BY_RECEPTOR_TYROSINE_KINASES |
| 3:49424231  | IP6K2    | REACTOME_SIGNALING_BY_RECEPTOR_TYROSINE_KINASES |
| 3:49450137  | IP6K2    | REACTOME_SIGNALING_BY_RECEPTOR_TYROSINE_KINASES |

|              |                 |                                                 |
|--------------|-----------------|-------------------------------------------------|
| 6:33153528   | <i>HLA-DRB5</i> | REACTOME_SIGNALING_BY_RECEPTOR_TYROSINE_KINASES |
| 6:112009427  | <i>FYN</i>      | REACTOME_SIGNALING_BY_RECEPTOR_TYROSINE_KINASES |
| 6:112056759  | <i>FYN</i>      | REACTOME_SIGNALING_BY_RECEPTOR_TYROSINE_KINASES |
| 6:112151452  | <i>FYN</i>      | REACTOME_SIGNALING_BY_RECEPTOR_TYROSINE_KINASES |
| 6:112561154  | <i>FYN</i>      | REACTOME_SIGNALING_BY_RECEPTOR_TYROSINE_KINASES |
| 9:17579690   | <i>SH3GL2_2</i> | REACTOME_SIGNALING_BY_RECEPTOR_TYROSINE_KINASES |
| 9:17609302   | <i>SH3GL2_2</i> | REACTOME_SIGNALING_BY_RECEPTOR_TYROSINE_KINASES |
| 9:17627444   | <i>SH3GL2_2</i> | REACTOME_SIGNALING_BY_RECEPTOR_TYROSINE_KINASES |
| 9:17710876   | <i>SH3GL2_2</i> | REACTOME_SIGNALING_BY_RECEPTOR_TYROSINE_KINASES |
| 9:17732590   | <i>SH3GL2_2</i> | REACTOME_SIGNALING_BY_RECEPTOR_TYROSINE_KINASES |
| 9:17737514   | <i>SH3GL2_2</i> | REACTOME_SIGNALING_BY_RECEPTOR_TYROSINE_KINASES |
| 9:17758945   | <i>SH3GL2_2</i> | REACTOME_SIGNALING_BY_RECEPTOR_TYROSINE_KINASES |
| 12:124219791 | <i>HIP1R</i>    | REACTOME_SIGNALING_BY_RECEPTOR_TYROSINE_KINASES |
| 17:7101771   | <i>V1NB1</i>    | REACTOME_SIGNALING_BY_RECEPTOR_TYROSINE_KINASES |
| 17:39883520  | <i>RETREG3</i>  | REACTOME_SIGNALING_BY_RECEPTOR_TYROSINE_KINASES |
| 17:40392358  | <i>RETREG3</i>  | REACTOME_SIGNALING_BY_RECEPTOR_TYROSINE_KINASES |
| 18:40543738  | <i>RIT2</i>     | REACTOME_SIGNALING_BY_RECEPTOR_TYROSINE_KINASES |
| 18:40596271  | <i>RIT2</i>     | REACTOME_SIGNALING_BY_RECEPTOR_TYROSINE_KINASES |
| 18:40612823  | <i>RIT2</i>     | REACTOME_SIGNALING_BY_RECEPTOR_TYROSINE_KINASES |
| 18:40649778  | <i>RIT2</i>     | REACTOME_SIGNALING_BY_RECEPTOR_TYROSINE_KINASES |
| 18:40673380  | <i>RIT2</i>     | REACTOME_SIGNALING_BY_RECEPTOR_TYROSINE_KINASES |
| 1:155975202  | <i>GBAP1</i>    | REACTOME_SIGNALING_BY_RHO_GTPASES               |
| 1:161035780  | <i>FCGR2A</i>   | REACTOME_SIGNALING_BY_RHO_GTPASES               |
| 3:49406095   | <i>IP6K2</i>    | REACTOME_SIGNALING_BY_RHO_GTPASES               |
| 3:49424231   | <i>IP6K2</i>    | REACTOME_SIGNALING_BY_RHO_GTPASES               |
| 3:49450137   | <i>IP6K2</i>    | REACTOME_SIGNALING_BY_RHO_GTPASES               |
| 4:89711319   | <i>SNCA_2</i>   | REACTOME_SIGNALING_BY_RHO_GTPASES               |
| 4:89740128   | <i>SNCA_2</i>   | REACTOME_SIGNALING_BY_RHO_GTPASES               |
| 4:90002389   | <i>SNCA_2</i>   | REACTOME_SIGNALING_BY_RHO_GTPASES               |
| 5:59958372   | <i>ELOVL7</i>   | REACTOME_SIGNALING_BY_RHO_GTPASES               |
| 12:122816734 | <i>HIP1R</i>    | REACTOME_SIGNALING_BY_RHO_GTPASES               |
| 12:122817580 | <i>HIP1R</i>    | REACTOME_SIGNALING_BY_RHO_GTPASES               |
| 12:122853197 | <i>HIP1R</i>    | REACTOME_SIGNALING_BY_RHO_GTPASES               |
| 12:123057792 | <i>HIP1R</i>    | REACTOME_SIGNALING_BY_RHO_GTPASES               |
| 12:123110365 | <i>HIP1R</i>    | REACTOME_SIGNALING_BY_RHO_GTPASES               |
| 12:123110785 | <i>HIP1R</i>    | REACTOME_SIGNALING_BY_RHO_GTPASES               |
| 17:7101771   | <i>V1NB1</i>    | REACTOME_SIGNALING_BY_RHO_GTPASES               |
| 17:7129974   | <i>V1NB1</i>    | REACTOME_SIGNALING_BY_RHO_GTPASES               |
| 17:43302259  | <i>CRHR1_2</i>  | REACTOME_SIGNALING_BY_RHO_GTPASES               |
| 17:43472507  | <i>CRHR1_2</i>  | REACTOME_SIGNALING_BY_RHO_GTPASES               |
| 3:48835245   | <i>IP6K2</i>    | REACTOME_SIGNALING_BY_ROBO_RECEPTORS            |
| 3:49406095   | <i>IP6K2</i>    | REACTOME_SIGNALING_BY_ROBO_RECEPTORS            |
| 3:49424231   | <i>IP6K2</i>    | REACTOME_SIGNALING_BY_ROBO_RECEPTORS            |
| 3:49450137   | <i>IP6K2</i>    | REACTOME_SIGNALING_BY_ROBO_RECEPTORS            |
| 3:49561208   | <i>IP6K2</i>    | REACTOME_SIGNALING_BY_ROBO_RECEPTORS            |
| 6:32814942   | <i>HLA-DRB5</i> | REACTOME_SIGNALING_BY_ROBO_RECEPTORS            |
| 6:112009427  | <i>FYN</i>      | REACTOME_SIGNALING_BY_SCF_KIT                   |
| 6:112056759  | <i>FYN</i>      | REACTOME_SIGNALING_BY_SCF_KIT                   |
| 6:112151452  | <i>FYN</i>      | REACTOME_SIGNALING_BY_SCF_KIT                   |
| 17:40392358  | <i>RETREG3</i>  | REACTOME_SIGNALING_BY_SCF_KIT                   |
| 2:135708115  | <i>TMEM163</i>  | REACTOME_SIGNALING_BY_TGF_BETA_FAMILY_MEMBERS   |
| 3:49406095   | <i>IP6K2</i>    | REACTOME_SIGNALING_BY_TGF_BETA_FAMILY_MEMBERS   |
| 3:49424231   | <i>IP6K2</i>    | REACTOME_SIGNALING_BY_TGF_BETA_FAMILY_MEMBERS   |

|              |                 |                                                 |
|--------------|-----------------|-------------------------------------------------|
| 3:49450137   | <i>IP6K2</i>    | REACTOME_SIGNALING_BY_TGF_BETA_FAMILY_MEMBERS   |
| 19:2251817   | <i>SPPL2B</i>   | REACTOME_SIGNALING_BY_TGF_BETA_FAMILY_MEMBERS   |
| 2:135708115  | <i>TMEM163</i>  | REACTOME_SIGNALING_BY_TGF_BETA_RECEPTOR_COMPLEX |
| 3:49406095   | <i>IP6K2</i>    | REACTOME_SIGNALING_BY_TGF_BETA_RECEPTOR_COMPLEX |
| 3:49424231   | <i>IP6K2</i>    | REACTOME_SIGNALING_BY_TGF_BETA_RECEPTOR_COMPLEX |
| 3:49450137   | <i>IP6K2</i>    | REACTOME_SIGNALING_BY_TGF_BETA_RECEPTOR_COMPLEX |
| 6:32814942   | <i>HLA-DRB5</i> | REACTOME_SIGNALING_BY_THE_B_CELL_RECEPTOR_BCR   |
| 6:112009427  | <i>FYN</i>      | REACTOME_SIGNALING_BY_THE_B_CELL_RECEPTOR_BCR   |
| 6:112056759  | <i>FYN</i>      | REACTOME_SIGNALING_BY_THE_B_CELL_RECEPTOR_BCR   |
| 6:112151452  | <i>FYN</i>      | REACTOME_SIGNALING_BY_THE_B_CELL_RECEPTOR_BCR   |
| 8:11381148   | <i>CTSB</i>     | REACTOME_SIGNALING_BY_THE_B_CELL_RECEPTOR_BCR   |
| 10:103185542 | <i>GBF1</i>     | REACTOME_SIGNALING_BY_THE_B_CELL_RECEPTOR_BCR   |
| 10:103308244 | <i>GBF1</i>     | REACTOME_SIGNALING_BY_THE_B_CELL_RECEPTOR_BCR   |
| 3:49406095   | <i>IP6K2</i>    | REACTOME_SIGNALING_BY_VEGF                      |
| 3:49424231   | <i>IP6K2</i>    | REACTOME_SIGNALING_BY_VEGF                      |
| 3:49450137   | <i>IP6K2</i>    | REACTOME_SIGNALING_BY_VEGF                      |
| 6:112009427  | <i>FYN</i>      | REACTOME_SIGNALING_BY_VEGF                      |
| 6:112056759  | <i>FYN</i>      | REACTOME_SIGNALING_BY_VEGF                      |
| 6:112151452  | <i>FYN</i>      | REACTOME_SIGNALING_BY_VEGF                      |
| 17:39883520  | <i>RETREG3</i>  | REACTOME_SIGNALING_BY_VEGF                      |
| 3:49406095   | <i>IP6K2</i>    | REACTOME_SIGNALING_BY_WNT                       |
| 3:49424231   | <i>IP6K2</i>    | REACTOME_SIGNALING_BY_WNT                       |
| 3:49450137   | <i>IP6K2</i>    | REACTOME_SIGNALING_BY_WNT                       |
| 6:32814942   | <i>HLA-DRB5</i> | REACTOME_SIGNALING_BY_WNT                       |
| 10:103185542 | <i>GBF1</i>     | REACTOME_SIGNALING_BY_WNT                       |
| 10:103308244 | <i>GBF1</i>     | REACTOME_SIGNALING_BY_WNT                       |
| 17:7129974   | <i>V1NB1</i>    | REACTOME_SIGNALING_BY_WNT                       |
| 17:44843651  | <i>WNT3</i>     | REACTOME_SIGNALING_BY_WNT                       |
| 17:44888209  | <i>WNT3</i>     | REACTOME_SIGNALING_BY_WNT                       |
| 17:44888715  | <i>WNT3</i>     | REACTOME_SIGNALING_BY_WNT                       |
| 17:44906949  | <i>WNT3</i>     | REACTOME_SIGNALING_BY_WNT                       |
| 17:44912901  | <i>WNT3</i>     | REACTOME_SIGNALING_BY_WNT                       |
| 17:44931399  | <i>WNT3</i>     | REACTOME_SIGNALING_BY_WNT                       |
| 17:44947756  | <i>WNT3</i>     | REACTOME_SIGNALING_BY_WNT                       |
| 19:3022354   | <i>SPPL2B</i>   | REACTOME_SIGNALING_BY_WNT                       |
| 19:3036350   | <i>SPPL2B</i>   | REACTOME_SIGNALING_BY_WNT                       |
| 18:40543738  | <i>RIT2</i>     | REACTOME_SIGNALLING_TO_ERKS                     |
| 18:40596271  | <i>RIT2</i>     | REACTOME_SIGNALLING_TO_ERKS                     |
| 18:40612823  | <i>RIT2</i>     | REACTOME_SIGNALLING_TO_ERKS                     |
| 18:40649778  | <i>RIT2</i>     | REACTOME_SIGNALLING_TO_ERKS                     |
| 18:40673380  | <i>RIT2</i>     | REACTOME_SIGNALLING_TO_ERKS                     |
| 18:40543738  | <i>RIT2</i>     | REACTOME_SIGNALLING_TO_P38_VIA_RIT_AND_RIN      |
| 18:40596271  | <i>RIT2</i>     | REACTOME_SIGNALLING_TO_P38_VIA_RIT_AND_RIN      |
| 18:40612823  | <i>RIT2</i>     | REACTOME_SIGNALLING_TO_P38_VIA_RIT_AND_RIN      |
| 18:40649778  | <i>RIT2</i>     | REACTOME_SIGNALLING_TO_P38_VIA_RIT_AND_RIN      |
| 18:40673380  | <i>RIT2</i>     | REACTOME_SIGNALLING_TO_P38_VIA_RIT_AND_RIN      |
| 1:205645310  | <i>RAB29</i>    | REACTOME_SLC_MEDIATED_TRANSMEMBRANE_TRANSPORT   |
| 1:205884274  | <i>RAB29</i>    | REACTOME_SLC_MEDIATED_TRANSMEMBRANE_TRANSPORT   |
| 6:31846234   | <i>HLA-DRB5</i> | REACTOME_SLC_MEDIATED_TRANSMEMBRANE_TRANSPORT   |
| 8:17427186   | <i>FGF20</i>    | REACTOME_SLC_MEDIATED_TRANSMEMBRANE_TRANSPORT   |
| 12:40240262  | <i>LRRK2_2</i>  | REACTOME_SLC_MEDIATED_TRANSMEMBRANE_TRANSPORT   |
| 12:40252360  | <i>LRRK2_2</i>  | REACTOME_SLC_MEDIATED_TRANSMEMBRANE_TRANSPORT   |
| 12:40267539  | <i>LRRK2_2</i>  | REACTOME_SLC_MEDIATED_TRANSMEMBRANE_TRANSPORT   |

|              |                 |                                                                 |
|--------------|-----------------|-----------------------------------------------------------------|
| 12:40302599  | <i>LRRK2_2</i>  | REACTOME_SLC_MEDIATED_TRANSMEMBRANE_TRANSPORT                   |
| 12:40348056  | <i>LRRK2_2</i>  | REACTOME_SLC_MEDIATED_TRANSMEMBRANE_TRANSPORT                   |
| 12:40349236  | <i>LRRK2_2</i>  | REACTOME_SLC_MEDIATED_TRANSMEMBRANE_TRANSPORT                   |
| 12:40378773  | <i>LRRK2_2</i>  | REACTOME_SLC_MEDIATED_TRANSMEMBRANE_TRANSPORT                   |
| 12:40393852  | <i>LRRK2_2</i>  | REACTOME_SLC_MEDIATED_TRANSMEMBRANE_TRANSPORT                   |
| 12:40405478  | <i>LRRK2_2</i>  | REACTOME_SLC_MEDIATED_TRANSMEMBRANE_TRANSPORT                   |
| 12:40413305  | <i>LRRK2_2</i>  | REACTOME_SLC_MEDIATED_TRANSMEMBRANE_TRANSPORT                   |
| 12:40414626  | <i>LRRK2_2</i>  | REACTOME_SLC_MEDIATED_TRANSMEMBRANE_TRANSPORT                   |
| 12:40437969  | <i>LRRK2_2</i>  | REACTOME_SLC_MEDIATED_TRANSMEMBRANE_TRANSPORT                   |
| 12:47192323  | <i>SCAF11</i>   | REACTOME_SLC_MEDIATED_TRANSMEMBRANE_TRANSPORT                   |
| 17:42338993  | <i>FAM171A2</i> | REACTOME_SLC_MEDIATED_TRANSMEMBRANE_TRANSPORT                   |
| 17:42338993  | <i>FAM171A2</i> | REACTOME_SLC_TRANSPORTER_DISORDERS                              |
| 2:135708115  | <i>TMEM163</i>  | REACTOME_SMAD2_SMAD3:SMAD4_HETEROTRIMER_REGULATES_TRANSCRIPTION |
| 1:231698854  | <i>SIPA1L2</i>  | REACTOME_SMALL_INTERFERING_RNA_SIRNA_BIOGENESIS                 |
| 5:134315853  | <i>C5orf24</i>  | REACTOME_SPERM_MOTILITY_AND_TAXES                               |
| 3:48199695   | <i>IP6K2</i>    | REACTOME_S_PHASE                                                |
| 3:48214438   | <i>IP6K2</i>    | REACTOME_S_PHASE                                                |
| 6:32814942   | <i>HLA-DRB5</i> | REACTOME_S_PHASE                                                |
| 12:133206648 | <i>FBRSL1</i>   | REACTOME_S_PHASE                                                |
| 12:133223685 | <i>FBRSL1</i>   | REACTOME_S_PHASE                                                |
| 12:133225045 | <i>FBRSL1</i>   | REACTOME_S_PHASE                                                |
| 17:45215865  | <i>WNT3</i>     | REACTOME_S_PHASE                                                |
| 17:45244822  | <i>WNT3</i>     | REACTOME_S_PHASE                                                |
| 20:5934513   | <i>CRLS1</i>    | REACTOME_S_PHASE                                                |
| 20:5968737   | <i>CRLS1</i>    | REACTOME_S_PHASE                                                |
| 20:5968964   | <i>CRLS1</i>    | REACTOME_S_PHASE                                                |
| 2:169389091  | <i>STK39</i>    | REACTOME_SPHINGOLIPID_DE_NOVO_BIOSYNTHESIS                      |
| 3:160668220  | <i>SPTSSB</i>   | REACTOME_SPHINGOLIPID_DE_NOVO_BIOSYNTHESIS                      |
| 3:161068566  | <i>SPTSSB</i>   | REACTOME_SPHINGOLIPID_DE_NOVO_BIOSYNTHESIS                      |
| 3:161075189  | <i>SPTSSB</i>   | REACTOME_SPHINGOLIPID_DE_NOVO_BIOSYNTHESIS                      |
| 2:169389091  | <i>STK39</i>    | REACTOME_SPHINGOLIPID_METABOLISM                                |
| 3:160668220  | <i>SPTSSB</i>   | REACTOME_SPHINGOLIPID_METABOLISM                                |
| 3:160817877  | <i>SPTSSB</i>   | REACTOME_SPHINGOLIPID_METABOLISM                                |
| 3:161068566  | <i>SPTSSB</i>   | REACTOME_SPHINGOLIPID_METABOLISM                                |
| 3:161075189  | <i>SPTSSB</i>   | REACTOME_SPHINGOLIPID_METABOLISM                                |
| 14:88393900  | <i>GALC</i>     | REACTOME_SPHINGOLIPID_METABOLISM                                |
| 14:88443553  | <i>GALC</i>     | REACTOME_SPHINGOLIPID_METABOLISM                                |
| 6:32814942   | <i>HLA-DRB5</i> | REACTOME_STABILIZATION_OF_P53                                   |
| 17:7578671   | <i>V1NB1</i>    | REACTOME_STABILIZATION_OF_P53                                   |
| 17:40392358  | <i>RETREG3</i>  | REACTOME_STAT5_ACTIVATION                                       |
| 4:170563153  | <i>CLCN3</i>    | REACTOME_STIMULI_SENSING_CHANNELS                               |
| 4:170569172  | <i>CLCN3</i>    | REACTOME_STIMULI_SENSING_CHANNELS                               |
| 4:170620812  | <i>CLCN3</i>    | REACTOME_STIMULI_SENSING_CHANNELS                               |
| 12:45755099  | <i>SCAF11</i>   | REACTOME_STIMULI_SENSING_CHANNELS                               |
| 17:40938261  | <i>RETREG3</i>  | REACTOME_STIMULI_SENSING_CHANNELS                               |
| 15:61293467  | <i>VPS13C</i>   | REACTOME_SUMOYLATION_OF_INTRACELLULAR_RECEPTORS                 |
| 17:7578671   | <i>V1NB1</i>    | REACTOME_SUMOYLATION_OF_TRANSCRIPTION_FACTORS                   |
| 15:61293467  | <i>VPS13C</i>   | REACTOME_SUMOYLATION                                            |
| 17:7578671   | <i>V1NB1</i>    | REACTOME_SUMOYLATION                                            |
| 6:32814942   | <i>HLA-DRB5</i> | REACTOME_SWITCHING_OF_ORIGINS_TO_A_POST_REPLICATIVE_STATE       |
| 17:45215865  | <i>WNT3</i>     | REACTOME_SWITCHING_OF_ORIGINS_TO_A_POST_REPLICATIVE_STATE       |
| 17:45244822  | <i>WNT3</i>     | REACTOME_SWITCHING_OF_ORIGINS_TO_A_POST_REPLICATIVE_STATE       |
| 20:5934513   | <i>CRLS1</i>    | REACTOME_SWITCHING_OF_ORIGINS_TO_A_POST_REPLICATIVE_STATE       |

|              |                 |                                                                                  |
|--------------|-----------------|----------------------------------------------------------------------------------|
| 20:5968737   | <i>CRLS1</i>    | REACTOME_SWITCHING_OF_ORIGINS_TO_A_POST_REPLICATIVE_STATE                        |
| 20:5968964   | <i>CRLS1</i>    | REACTOME_SWITCHING_OF_ORIGINS_TO_A_POST_REPLICATIVE_STATE                        |
| 17:7101771   | <i>V1NB1</i>    | REACTOME_SYNAPTIC_ADHESION_LIKE_MOLECULES                                        |
| 17:7983799   | <i>V1NB1</i>    | REACTOME_SYNTHESIS_OF_12_EICOSATETRAENOIC_ACID_DERIVATIVES                       |
| 17:8019125   | <i>V1NB1</i>    | REACTOME_SYNTHESIS_OF_12_EICOSATETRAENOIC_ACID_DERIVATIVES                       |
| 5:133710339  | <i>C5orf24</i>  | REACTOME_SYNTHESIS_OF_ACTIVE_UBIQUITIN:_ROLES_OF_E1_AND_E2_ENZYMES               |
| 9:33845203   | <i>UBAP2</i>    | REACTOME_SYNTHESIS_OF_ACTIVE_UBIQUITIN:_ROLES_OF_E1_AND_E2_ENZYMES               |
| 16:30999462  | <i>SETD1A</i>   | REACTOME_SYNTHESIS_OF_BILE_ACIDS_AND_BILE_SALTS                                  |
| 16:30999462  | <i>SETD1A</i>   | REACTOME_SYNTHESIS_OF_BILE_ACIDS_AND_BILE_SALTS_VIA_24_HYDROXYCHOLESTEROL        |
| 16:30999462  | <i>SETD1A</i>   | REACTOME_SYNTHESIS_OF_BILE_ACIDS_AND_BILE_SALTS_VIA_27_HYDROXYCHOLESTEROL        |
| 16:30999462  | <i>SETD1A</i>   | REACTOME_SYNTHESIS_OF_BILE_ACIDS_AND_BILE_SALTS_VIA_7ALPHA_HYDROXYCHOLESTEROL    |
| 1:172386261  | <i>VAMP4</i>    | REACTOME_SYNTHESIS_OF_GLYCOSYLPHOSPHATIDYLINOSITOL_GPI                           |
| 1:172388441  | <i>VAMP4</i>    | REACTOME_SYNTHESIS_OF_GLYCOSYLPHOSPHATIDYLINOSITOL_GPI                           |
| 1:172389198  | <i>VAMP4</i>    | REACTOME_SYNTHESIS_OF_GLYCOSYLPHOSPHATIDYLINOSITOL_GPI                           |
| 1:226910340  | <i>ITPKB</i>    | REACTOME_SYNTHESIS_OF_IP3_AND_IP4_IN_THE_CYTOSOL                                 |
| 1:226916078  | <i>ITPKB</i>    | REACTOME_SYNTHESIS_OF_IP3_AND_IP4_IN_THE_CYTOSOL                                 |
| 17:43195981  | <i>CRHR1_2</i>  | REACTOME_SYNTHESIS_OF_IP3_AND_IP4_IN_THE_CYTOSOL                                 |
| 2:96858914   | <i>KCNIP3</i>   | REACTOME_SYNTHESIS_OF_PC                                                         |
| 6:31846234   | <i>HLA-DRB5</i> | REACTOME_SYNTHESIS_OF_PC                                                         |
| 10:121505277 | <i>INPP5F</i>   | REACTOME_SYNTHESIS_OF_PIPS_AT_THE_EARLY_ENDOSOME_MEMBRANE                        |
| 10:121538407 | <i>INPP5F</i>   | REACTOME_SYNTHESIS_OF_PIPS_AT_THE_EARLY_ENDOSOME_MEMBRANE                        |
| 12:123561638 | <i>HIP1R</i>    | REACTOME_SYNTHESIS_OF_PI                                                         |
| 12:123585705 | <i>HIP1R</i>    | REACTOME_SYNTHESIS_OF_PI                                                         |
| 5:60053220   | <i>ELOVL7</i>   | REACTOME_SYNTHESIS_OF_VERY_LONG_CHAIN_FATTY_ACYL_COAS                            |
| 6:32151443   | <i>HLA-DRB5</i> | REACTOME_TAK1_ACTIVATES_NFKB_BY_PHOSPHORYLATION_AND_ACTIVATION_OF_IKKS_COMPLEX   |
| 16:50730088  | <i>CASC16</i>   | REACTOME_TAK1_ACTIVATES_NFKB_BY_PHOSPHORYLATION_AND_ACTIVATION_OF_IKKS_COMPLEX   |
| 16:50730446  | <i>CASC16</i>   | REACTOME_TAK1_ACTIVATES_NFKB_BY_PHOSPHORYLATION_AND_ACTIVATION_OF_IKKS_COMPLEX   |
| 16:50745926  | <i>CASC16</i>   | REACTOME_TAK1_ACTIVATES_NFKB_BY_PHOSPHORYLATION_AND_ACTIVATION_OF_IKKS_COMPLEX   |
| 6:32814942   | <i>HLA-DRB5</i> | REACTOME_TCF_DEPENDENT_SIGNALING_IN_RESPONSE_TO_WNT                              |
| 10:103185542 | <i>GBF1</i>     | REACTOME_TCF_DEPENDENT_SIGNALING_IN_RESPONSE_TO_WNT                              |
| 10:103308244 | <i>GBF1</i>     | REACTOME_TCF_DEPENDENT_SIGNALING_IN_RESPONSE_TO_WNT                              |
| 17:7129974   | <i>V1NB1</i>    | REACTOME_TCF_DEPENDENT_SIGNALING_IN_RESPONSE_TO_WNT                              |
| 17:44843651  | <i>WNT3</i>     | REACTOME_TCF_DEPENDENT_SIGNALING_IN_RESPONSE_TO_WNT                              |
| 17:44888209  | <i>WNT3</i>     | REACTOME_TCF_DEPENDENT_SIGNALING_IN_RESPONSE_TO_WNT                              |
| 17:44888715  | <i>WNT3</i>     | REACTOME_TCF_DEPENDENT_SIGNALING_IN_RESPONSE_TO_WNT                              |
| 17:44906949  | <i>WNT3</i>     | REACTOME_TCF_DEPENDENT_SIGNALING_IN_RESPONSE_TO_WNT                              |
| 19:3022354   | <i>SPPL2B</i>   | REACTOME_TCF_DEPENDENT_SIGNALING_IN_RESPONSE_TO_WNT                              |
| 19:3036350   | <i>SPPL2B</i>   | REACTOME_TCF_DEPENDENT_SIGNALING_IN_RESPONSE_TO_WNT                              |
| 6:32602372   | <i>HLA-DRB5</i> | REACTOME_TCR_SIGNALING                                                           |
| 6:32814942   | <i>HLA-DRB5</i> | REACTOME_TCR_SIGNALING                                                           |
| 10:103185542 | <i>GBF1</i>     | REACTOME_TCR_SIGNALING                                                           |
| 10:103308244 | <i>GBF1</i>     | REACTOME_TCR_SIGNALING                                                           |
| 12:133206648 | <i>FBRSL1</i>   | REACTOME_TELOMERE_C_STRAND_LAGGING_STRAND_SYNTHESIS                              |
| 12:133223685 | <i>FBRSL1</i>   | REACTOME_TELOMERE_C_STRAND_LAGGING_STRAND_SYNTHESIS                              |
| 12:133225045 | <i>FBRSL1</i>   | REACTOME_TELOMERE_C_STRAND_LAGGING_STRAND_SYNTHESIS                              |
| 12:133206648 | <i>FBRSL1</i>   | REACTOME_TELOMERE_MAINTENANCE                                                    |
| 12:133223685 | <i>FBRSL1</i>   | REACTOME_TELOMERE_MAINTENANCE                                                    |
| 12:133225045 | <i>FBRSL1</i>   | REACTOME_TELOMERE_MAINTENANCE                                                    |
| 12:133206648 | <i>FBRSL1</i>   | REACTOME_TERMINATION_OF_TRANSLESION_DNA_SYNTHESIS                                |
| 12:133223685 | <i>FBRSL1</i>   | REACTOME_TERMINATION_OF_TRANSLESION_DNA_SYNTHESIS                                |
| 12:133225045 | <i>FBRSL1</i>   | REACTOME_TERMINATION_OF_TRANSLESION_DNA_SYNTHESIS                                |
| 14:55348869  | <i>GCH1</i>     | REACTOME_TETRAHYDROBIOPTERIN_BH4_SYNTHESIS_RECYCLING_SALVAGE_AND_REGULATION      |
| 3:49406095   | <i>IP6K2</i>    | REACTOME_TGF_BETA_RECEPTOR_SIGNALING_IN_EMT_EPITHELIAL_TO_MESENCHYMAL_TRANSITION |

|              |                 |                                                                                       |
|--------------|-----------------|---------------------------------------------------------------------------------------|
| 3:49424231   | <i>IP6K2</i>    | REACTOME_TGF_BETA_RECEPTOR_SIGNALING_IN_EMT_EPITHELIAL_TO_MESENCHYMAL_TRANSITION      |
| 3:49450137   | <i>IP6K2</i>    | REACTOME_TGF_BETA_RECEPTOR_SIGNALING_IN_EMT_EPITHELIAL_TO_MESENCHYMAL_TRANSITION      |
| 1:161171736  | <i>FCGR2A</i>   | REACTOME_THE_CITRIC_ACID_TCA_CYCLE_AND_RESPIRATORY_ELECTRON_TRANSPORT                 |
| 5:60273923   | <i>ELOVL7</i>   | REACTOME_THE_CITRIC_ACID_TCA_CYCLE_AND_RESPIRATORY_ELECTRON_TRANSPORT                 |
| 10:15199347  | <i>ITGA8</i>    | REACTOME_THE_PHOTOTRANSDUCTION_CASCADE                                                |
| 17:43132290  | <i>CRHR1_2</i>  | REACTOME_THE_PHOTOTRANSDUCTION_CASCADE                                                |
| 6:32814942   | <i>HLA-DRB5</i> | REACTOME_THE_ROLE_OF_GTSE1_IN_G2_M_PROGRESSION_AFTER_G2_CHECKPOINT                    |
| 17:7578671   | <i>V1NB1</i>    | REACTOME_THE_ROLE_OF_GTSE1_IN_G2_M_PROGRESSION_AFTER_G2_CHECKPOINT                    |
| 6:112009427  | <i>FYN</i>      | REACTOME_THE_ROLE_OF_NEF_IN_HIV_1_REPLICATION_AND_DISEASE_PATHOGENESIS                |
| 6:112056759  | <i>FYN</i>      | REACTOME_THE_ROLE_OF_NEF_IN_HIV_1_REPLICATION_AND_DISEASE_PATHOGENESIS                |
| 6:112151452  | <i>FYN</i>      | REACTOME_THE_ROLE_OF_NEF_IN_HIV_1_REPLICATION_AND_DISEASE_PATHOGENESIS                |
| 19:3156505   | <i>SPPL2B</i>   | REACTOME_THROMBIN_SIGNALLING_THROUGH_PROTEINASE_ACTIVATED_RECEPTORS_PARS              |
| 19:3156505   | <i>SPPL2B</i>   | REACTOME_THROMBOXANE_SIGNALLING_THROUGH_TP_RECEPTOR                                   |
| 6:32814942   | <i>HLA-DRB5</i> | REACTOME_TNFR2_NON_CANONICAL_NF_KB_PATHWAY                                            |
| 10:103185542 | <i>GBF1</i>     | REACTOME_TNFR2_NON_CANONICAL_NF_KB_PATHWAY                                            |
| 10:103308244 | <i>GBF1</i>     | REACTOME_TNFR2_NON_CANONICAL_NF_KB_PATHWAY                                            |
| 17:7455536   | <i>V1NB1</i>    | REACTOME_TNFR2_NON_CANONICAL_NF_KB_PATHWAY                                            |
| 17:43390763  | <i>CRHR1_2</i>  | REACTOME_TNFR2_NON_CANONICAL_NF_KB_PATHWAY                                            |
| 17:7455536   | <i>V1NB1</i>    | REACTOME_TNF_RECEPTOR_SUPERFAMILY_TNFSF_MEMBERS_MEDIATING_NON_CANONICAL_NF_KB_PATHWAY |
| 17:43390763  | <i>CRHR1_2</i>  | REACTOME_TNF_RECEPTOR_SUPERFAMILY_TNFSF_MEMBERS_MEDIATING_NON_CANONICAL_NF_KB_PATHWAY |
| 19:2335872   | <i>SPPL2B</i>   | REACTOME_TNF_SIGNALING                                                                |
| 19:2346990   | <i>SPPL2B</i>   | REACTOME_TNF_SIGNALING                                                                |
| 19:2352757   | <i>SPPL2B</i>   | REACTOME_TNF_SIGNALING                                                                |
| 1:171945488  | <i>VAMP4</i>    | REACTOME_TOLL_LIKE_RECEPTOR_4_TLR4_CASCADE                                            |
| 1:172137119  | <i>VAMP4</i>    | REACTOME_TOLL_LIKE_RECEPTOR_4_TLR4_CASCADE                                            |
| 1:172386261  | <i>VAMP4</i>    | REACTOME_TOLL_LIKE_RECEPTOR_4_TLR4_CASCADE                                            |
| 6:32151443   | <i>HLA-DRB5</i> | REACTOME_TOLL_LIKE_RECEPTOR_4_TLR4_CASCADE                                            |
| 10:103185542 | <i>GBF1</i>     | REACTOME_TOLL_LIKE_RECEPTOR_4_TLR4_CASCADE                                            |
| 10:103308244 | <i>GBF1</i>     | REACTOME_TOLL_LIKE_RECEPTOR_4_TLR4_CASCADE                                            |
| 16:50730088  | <i>CASC16</i>   | REACTOME_TOLL_LIKE_RECEPTOR_4_TLR4_CASCADE                                            |
| 16:50730446  | <i>CASC16</i>   | REACTOME_TOLL_LIKE_RECEPTOR_4_TLR4_CASCADE                                            |
| 16:50745926  | <i>CASC16</i>   | REACTOME_TOLL_LIKE_RECEPTOR_4_TLR4_CASCADE                                            |
| 6:32151443   | <i>HLA-DRB5</i> | REACTOME_TOLL_LIKE_RECEPTOR_9_TLR9_CASCADE                                            |
| 10:103185542 | <i>GBF1</i>     | REACTOME_TOLL_LIKE_RECEPTOR_9_TLR9_CASCADE                                            |
| 10:103308244 | <i>GBF1</i>     | REACTOME_TOLL_LIKE_RECEPTOR_9_TLR9_CASCADE                                            |
| 16:50730088  | <i>CASC16</i>   | REACTOME_TOLL_LIKE_RECEPTOR_9_TLR9_CASCADE                                            |
| 16:50730446  | <i>CASC16</i>   | REACTOME_TOLL_LIKE_RECEPTOR_9_TLR9_CASCADE                                            |
| 16:50745926  | <i>CASC16</i>   | REACTOME_TOLL_LIKE_RECEPTOR_9_TLR9_CASCADE                                            |
| 1:171945488  | <i>VAMP4</i>    | REACTOME_TOLL_LIKE_RECEPTOR_CASCADES                                                  |
| 1:172137119  | <i>VAMP4</i>    | REACTOME_TOLL_LIKE_RECEPTOR_CASCADES                                                  |
| 1:172386261  | <i>VAMP4</i>    | REACTOME_TOLL_LIKE_RECEPTOR_CASCADES                                                  |
| 6:32151443   | <i>HLA-DRB5</i> | REACTOME_TOLL_LIKE_RECEPTOR_CASCADES                                                  |
| 8:11712443   | <i>CTSB</i>     | REACTOME_TOLL_LIKE_RECEPTOR_CASCADES                                                  |
| 10:103185542 | <i>GBF1</i>     | REACTOME_TOLL_LIKE_RECEPTOR_CASCADES                                                  |
| 10:103308244 | <i>GBF1</i>     | REACTOME_TOLL_LIKE_RECEPTOR_CASCADES                                                  |
| 16:50730088  | <i>CASC16</i>   | REACTOME_TOLL_LIKE_RECEPTOR_CASCADES                                                  |
| 16:50730446  | <i>CASC16</i>   | REACTOME_TOLL_LIKE_RECEPTOR_CASCADES                                                  |
| 16:50745926  | <i>CASC16</i>   | REACTOME_TOLL_LIKE_RECEPTOR_CASCADES                                                  |
| 6:32151443   | <i>HLA-DRB5</i> | REACTOME_TOLL_LIKE_RECEPTOR_TLR1:TLR2_CASCADE                                         |
| 10:103185542 | <i>GBF1</i>     | REACTOME_TOLL_LIKE_RECEPTOR_TLR1:TLR2_CASCADE                                         |
| 10:103308244 | <i>GBF1</i>     | REACTOME_TOLL_LIKE_RECEPTOR_TLR1:TLR2_CASCADE                                         |
| 16:50730088  | <i>CASC16</i>   | REACTOME_TOLL_LIKE_RECEPTOR_TLR1:TLR2_CASCADE                                         |
| 16:50730446  | <i>CASC16</i>   | REACTOME_TOLL_LIKE_RECEPTOR_TLR1:TLR2_CASCADE                                         |

|              |          |                                                                                                      |
|--------------|----------|------------------------------------------------------------------------------------------------------|
| 16:50745926  | CASC16   | REACTOME_TOLL LIKE RECEPTOR_TLR1:TLR2_CASCADE                                                        |
| 17:7578671   | V1NB1    | REACTOME_TP53_REGULATES_METABOLIC_GENES                                                              |
| 17:7578671   | V1NB1    | P53_REGULATES_TRANSCRIPTION_OF_ADDITIONAL_CELL_CYCLE_GENES_WHOSE_EXACT_ROLE_IN_THE_P53_PATHWAY_REM   |
| 17:7578671   | V1NB1    | REACTOME_TP53_REGULATES_TRANSCRIPTION_OF_CASPASE_ACTIVATORS_AND_CASPASES                             |
| 17:7578671   | V1NB1    | REACTOME_TP53_REGULATES_TRANSCRIPTION_OF_CELL_CYCLE_GENES                                            |
| 8:23050400   | BIN3     | REACTOME_TP53_REGULATES_TRANSCRIPTION_OF_CELL_DEATH_GENES                                            |
| 17:7578671   | V1NB1    | REACTOME_TP53_REGULATES_TRANSCRIPTION_OF_CELL_DEATH_GENES                                            |
| 8:23050400   | BIN3     | REACTOME_TP53_REGULATES_TRANSCRIPTION_OF_DEATH_RECEPTORS_AND_LIGANDS                                 |
| 17:7578671   | V1NB1    | REACTOME_TP53_REGULATES_TRANSCRIPTION_OF_DEATH_RECEPTORS_AND_LIGANDS                                 |
| 2:135708115  | TMEM163  | REACTOME_TP53_REGULATES_TRANSCRIPTION_OF_DNA_REPAIR_GENES                                            |
| 6:31925679   | HLA-DRB5 | REACTOME_TP53_REGULATES_TRANSCRIPTION_OF_DNA_REPAIR_GENES                                            |
| 17:7578671   | V1NB1    | REACTOME_TP53_REGULATES_TRANSCRIPTION_OF_DNA_REPAIR_GENES                                            |
| 17:7578671   | V1NB1    | REACTOME_TP53_REGULATES_TRANSCRIPTION_OF_GENES_INVOLVED_IN_CYTOCHROME_C_RELEASE                      |
| 17:7578671   | V1NB1    | REACTOME_TP53_REGULATES_TRANSCRIPTION_OF_GENES_INVOLVED_IN_G1_CELL_CYCLE_ARREST                      |
| 17:7578671   | V1NB1    | REACTOME_TP53_REGULATES_TRANSCRIPTION_OF_GENES_INVOLVED_IN_G2_CELL_CYCLE_ARREST                      |
| 17:7578671   | V1NB1    | ATES_TRANSCRIPTION_OF_SEVERAL_ADDITIONAL_CELL_DEATH_GENES_WHOSE_SPECIFIC_ROLES_IN_P53_DEPENDENT_APOP |
| 6:32151443   | HLA-DRB5 | REACTOME_TRAF6_MEDIATED_NF_KB_ACTIVATION                                                             |
| 8:11712443   | CTSB     | REACTOME_TRAFFICKING_AND_PROCESSING_OF_ENDOSOMAL_TLR                                                 |
| 17:44800946  | WNT3     | REACTOME_TRAFFICKING_OF_GLR2_CONTAINING_AMPA_RECEPTORS                                               |
| 17:44833217  | WNT3     | REACTOME_TRAFFICKING_OF_GLR2_CONTAINING_AMPA_RECEPTORS                                               |
| 10:104443875 | GBF1     | REACTOME_TRAFFICKING_OF_MYRISTOYLATED_PROTEINS_TO_THE_CILIUM                                         |
| 10:104452818 | GBF1     | REACTOME_TRAFFICKING_OF_MYRISTOYLATED_PROTEINS_TO_THE_CILIUM                                         |
| 8:23050400   | BIN3     | REACTOME_TRAIL_SIGNALING                                                                             |
| 2:135708115  | TMEM163  | REACTOME_TRANSCRIPTIONAL_ACTIVITY_OF_SMAD2_SMAD3:SMAD4_HETEROTRIMER                                  |
| 6:31862876   | HLA-DRB5 | REACTOME_TRANSCRIPTIONAL_REGULATION_BY_E2F6                                                          |
| 4:114424939  | CAMK2D   | REACTOME_TRANSCRIPTIONAL_REGULATION_BY_MECP2                                                         |
| 6:32814942   | HLA-DRB5 | REACTOME_TRANSCRIPTIONAL_REGULATION_BY_RUNX1                                                         |
| 8:11381148   | CTSB     | REACTOME_TRANSCRIPTIONAL_REGULATION_BY_RUNX1                                                         |
| 12:46134812  | SCAF11   | REACTOME_TRANSCRIPTIONAL_REGULATION_BY_RUNX1                                                         |
| 14:55515304  | GCH1     | REACTOME_TRANSCRIPTIONAL_REGULATION_BY_RUNX1                                                         |
| 6:32814942   | HLA-DRB5 | REACTOME_TRANSCRIPTIONAL_REGULATION_BY_RUNX2                                                         |
| 6:32814942   | HLA-DRB5 | REACTOME_TRANSCRIPTIONAL_REGULATION_BY_RUNX3                                                         |
| 6:32941506   | HLA-DRB5 | REACTOME_TRANSCRIPTIONAL_REGULATION_BY_RUNX3                                                         |
| 16:30510571  | SETD1A   | REACTOME_TRANSCRIPTIONAL_REGULATION_BY_RUNX3                                                         |
| 16:30516492  | SETD1A   | REACTOME_TRANSCRIPTIONAL_REGULATION_BY_RUNX3                                                         |
| 16:30520856  | SETD1A   | REACTOME_TRANSCRIPTIONAL_REGULATION_BY_RUNX3                                                         |
| 17:7578671   | V1NB1    | REACTOME_TRANSCRIPTIONAL_REGULATION_BY_RUNX3                                                         |
| 2:135708115  | TMEM163  | REACTOME_TRANSCRIPTIONAL_REGULATION_BY_TP53                                                          |
| 6:31862876   | HLA-DRB5 | REACTOME_TRANSCRIPTIONAL_REGULATION_BY_TP53                                                          |
| 6:31925679   | HLA-DRB5 | REACTOME_TRANSCRIPTIONAL_REGULATION_BY_TP53                                                          |
| 8:23050400   | BIN3     | REACTOME_TRANSCRIPTIONAL_REGULATION_BY_TP53                                                          |
| 17:7578671   | V1NB1    | REACTOME_TRANSCRIPTIONAL_REGULATION_BY_TP53                                                          |
| 17:59922925  | BRIP1    | REACTOME_TRANSCRIPTIONAL_REGULATION_BY_TP53                                                          |
| 4:17622910   | LCORL    | REACTOME_TRANSCRIPTIONAL_REGULATION_OF_WHITE_ADIPOCYTE_DIFFERENTIATION                               |
| 4:17632603   | LCORL    | REACTOME_TRANSCRIPTIONAL_REGULATION_OF_WHITE_ADIPOCYTE_DIFFERENTIATION                               |
| 12:133206648 | FBRSL1   | REACTOME_TRANSCRIPTION_COUPLED_NUCLEOTIDE_EXCISION_REPAIR_TC_NER                                     |
| 12:133223685 | FBRSL1   | REACTOME_TRANSCRIPTION_COUPLED_NUCLEOTIDE_EXCISION_REPAIR_TC_NER                                     |
| 12:133225045 | FBRSL1   | REACTOME_TRANSCRIPTION_COUPLED_NUCLEOTIDE_EXCISION_REPAIR_TC_NER                                     |
| 3:48199695   | IP6K2    | REACTOME_TRANSCRIPTION_OF_E2F_TARGETS_UNDER_NEGATIVE_CONTROL_BY_DREAM_COMPLEX                        |
| 3:48214438   | IP6K2    | REACTOME_TRANSCRIPTION_OF_E2F_TARGETS_UNDER_NEGATIVE_CONTROL_BY_DREAM_COMPLEX                        |
| 2:135708115  | TMEM163  | REACTOME_TRANSCRIPTION_OF_THE_HIV_GENOME                                                             |
| 6:31925679   | HLA-DRB5 | REACTOME_TRANSCRIPTION_OF_THE_HIV_GENOME                                                             |
| 12:124219791 | HIP1R    | REACTOME_TRANSFERRIN_ENDOCYTOSIS_AND_RECYCLING                                                       |

|              |                 |                                                                                             |
|--------------|-----------------|---------------------------------------------------------------------------------------------|
| 3:121411876  | <i>KPNA1</i>    | REACTOME_TRANS_GOLGI_NETWORK_VESICLE_BUDDING                                                |
| 3:121412702  | <i>KPNA1</i>    | REACTOME_TRANS_GOLGI_NETWORK_VESICLE_BUDDING                                                |
| 4:925376     | <i>GAK</i>      | REACTOME_TRANS_GOLGI_NETWORK_VESICLE_BUDDING                                                |
| 9:17579690   | <i>SH3GL2_2</i> | REACTOME_TRANS_GOLGI_NETWORK_VESICLE_BUDDING                                                |
| 9:17609302   | <i>SH3GL2_2</i> | REACTOME_TRANS_GOLGI_NETWORK_VESICLE_BUDDING                                                |
| 9:17627444   | <i>SH3GL2_2</i> | REACTOME_TRANS_GOLGI_NETWORK_VESICLE_BUDDING                                                |
| 9:17710876   | <i>SH3GL2_2</i> | REACTOME_TRANS_GOLGI_NETWORK_VESICLE_BUDDING                                                |
| 9:17732590   | <i>SH3GL2_2</i> | REACTOME_TRANS_GOLGI_NETWORK_VESICLE_BUDDING                                                |
| 9:17737514   | <i>SH3GL2_2</i> | REACTOME_TRANS_GOLGI_NETWORK_VESICLE_BUDDING                                                |
| 9:17758945   | <i>SH3GL2_2</i> | REACTOME_TRANS_GOLGI_NETWORK_VESICLE_BUDDING                                                |
| 10:104005410 | <i>GBF1</i>     | REACTOME_TRANS_GOLGI_NETWORK_VESICLE_BUDDING                                                |
| 10:104034550 | <i>GBF1</i>     | REACTOME_TRANS_GOLGI_NETWORK_VESICLE_BUDDING                                                |
| 12:123326598 | <i>HIP1R</i>    | REACTOME_TRANS_GOLGI_NETWORK_VESICLE_BUDDING                                                |
| 1:155698425  | <i>GBAP1</i>    | REACTOME_TRANSLATION                                                                        |
| 6:31758240   | <i>HLA-DRB5</i> | REACTOME_TRANSLATION                                                                        |
| 6:31762311   | <i>HLA-DRB5</i> | REACTOME_TRANSLATION                                                                        |
| 17:7479140   | <i>V1NB1</i>    | REACTOME_TRANSLATION                                                                        |
| 17:7480325   | <i>V1NB1</i>    | REACTOME_TRANSLATION                                                                        |
| 6:111628626  | <i>FYN</i>      | REACTOME_TRANSLESION_SYNTHESIS_BY_POLK                                                      |
| 6:111628626  | <i>FYN</i>      | REACTOME_TRANSLESION_SYNTHESIS_BY_Y_FAMILY_DNA_POLYMERASES_BYPASSES_LESIONS_ON_DNA_TEMPLATE |
| 12:133206648 | <i>FBRSL1</i>   | REACTOME_TRANSLESION_SYNTHESIS_BY_Y_FAMILY_DNA_POLYMERASES_BYPASSES_LESIONS_ON_DNA_TEMPLATE |
| 12:133223685 | <i>FBRSL1</i>   | REACTOME_TRANSLESION_SYNTHESIS_BY_Y_FAMILY_DNA_POLYMERASES_BYPASSES_LESIONS_ON_DNA_TEMPLATE |
| 12:133225045 | <i>FBRSL1</i>   | REACTOME_TRANSLESION_SYNTHESIS_BY_Y_FAMILY_DNA_POLYMERASES_BYPASSES_LESIONS_ON_DNA_TEMPLATE |
| 6:32602372   | <i>HLA-DRB5</i> | REACTOME_TRANSLOCATION_OF_ZAP_70_TO_IMMUNOLOGICAL_SYNAPSE                                   |
| 3:48835245   | <i>IP6K2</i>    | REACTOME_TRANSMISSION_ACROSS_CHEMICAL_SYNAPSES                                              |
| 3:123057397  | <i>KPNA1</i>    | REACTOME_TRANSMISSION_ACROSS_CHEMICAL_SYNAPSES                                              |
| 4:114424939  | <i>CAMK2D</i>   | REACTOME_TRANSMISSION_ACROSS_CHEMICAL_SYNAPSES                                              |
| 6:29579544   | <i>TRIM40</i>   | REACTOME_TRANSMISSION_ACROSS_CHEMICAL_SYNAPSES                                              |
| 11:83188607  | <i>DLG2</i>     | REACTOME_TRANSMISSION_ACROSS_CHEMICAL_SYNAPSES                                              |
| 11:83219006  | <i>DLG2</i>     | REACTOME_TRANSMISSION_ACROSS_CHEMICAL_SYNAPSES                                              |
| 11:83538733  | <i>DLG2</i>     | REACTOME_TRANSMISSION_ACROSS_CHEMICAL_SYNAPSES                                              |
| 11:83544472  | <i>DLG2</i>     | REACTOME_TRANSMISSION_ACROSS_CHEMICAL_SYNAPSES                                              |
| 11:83656201  | <i>DLG2</i>     | REACTOME_TRANSMISSION_ACROSS_CHEMICAL_SYNAPSES                                              |
| 11:83700228  | <i>DLG2</i>     | REACTOME_TRANSMISSION_ACROSS_CHEMICAL_SYNAPSES                                              |
| 11:83762918  | <i>DLG2</i>     | REACTOME_TRANSMISSION_ACROSS_CHEMICAL_SYNAPSES                                              |
| 11:83894247  | <i>DLG2</i>     | REACTOME_TRANSMISSION_ACROSS_CHEMICAL_SYNAPSES                                              |
| 11:84021037  | <i>DLG2</i>     | REACTOME_TRANSMISSION_ACROSS_CHEMICAL_SYNAPSES                                              |
| 11:84324361  | <i>DLG2</i>     | REACTOME_TRANSMISSION_ACROSS_CHEMICAL_SYNAPSES                                              |
| 11:84373496  | <i>DLG2</i>     | REACTOME_TRANSMISSION_ACROSS_CHEMICAL_SYNAPSES                                              |
| 11:84403409  | <i>DLG2</i>     | REACTOME_TRANSMISSION_ACROSS_CHEMICAL_SYNAPSES                                              |
| 17:7101771   | <i>V1NB1</i>    | REACTOME_TRANSMISSION_ACROSS_CHEMICAL_SYNAPSES                                              |
| 17:43999203  | <i>WNT3</i>     | REACTOME_TRANSMISSION_ACROSS_CHEMICAL_SYNAPSES                                              |
| 17:44005297  | <i>WNT3</i>     | REACTOME_TRANSMISSION_ACROSS_CHEMICAL_SYNAPSES                                              |
| 17:44019712  | <i>WNT3</i>     | REACTOME_TRANSMISSION_ACROSS_CHEMICAL_SYNAPSES                                              |
| 17:44060492  | <i>WNT3</i>     | REACTOME_TRANSMISSION_ACROSS_CHEMICAL_SYNAPSES                                              |
| 17:44065263  | <i>WNT3</i>     | REACTOME_TRANSMISSION_ACROSS_CHEMICAL_SYNAPSES                                              |
| 17:44081178  | <i>WNT3</i>     | REACTOME_TRANSMISSION_ACROSS_CHEMICAL_SYNAPSES                                              |
| 17:44083297  | <i>WNT3</i>     | REACTOME_TRANSMISSION_ACROSS_CHEMICAL_SYNAPSES                                              |
| 17:44800946  | <i>WNT3</i>     | REACTOME_TRANSMISSION_ACROSS_CHEMICAL_SYNAPSES                                              |
| 17:44833217  | <i>WNT3</i>     | REACTOME_TRANSMISSION_ACROSS_CHEMICAL_SYNAPSES                                              |
| 21:39197323  | <i>DYRK1A</i>   | REACTOME_TRANSMISSION_ACROSS_CHEMICAL_SYNAPSES                                              |
| 6:31846234   | <i>HLA-DRB5</i> | REACTOME_TRANSPORT_OF_BILE_SALTS_AND_ORGANIC_ACIDS_METAL_IONS_AND_AMINE_COMPOUNDS           |
| 12:40240262  | <i>LRRK2_2</i>  | REACTOME_TRANSPORT_OF_BILE_SALTS_AND_ORGANIC_ACIDS_METAL_IONS_AND_AMINE_COMPOUNDS           |

|              |                 |                                                                                   |
|--------------|-----------------|-----------------------------------------------------------------------------------|
| 12:40252360  | <i>LRRK2_2</i>  | REACTOME_TRANSPORT_OF_BILE_SALTS_AND_ORGANIC_ACIDS_METAL_IONS_AND_AMINE_COMPOUNDS |
| 12:40267539  | <i>LRRK2_2</i>  | REACTOME_TRANSPORT_OF_BILE_SALTS_AND_ORGANIC_ACIDS_METAL_IONS_AND_AMINE_COMPOUNDS |
| 12:40302599  | <i>LRRK2_2</i>  | REACTOME_TRANSPORT_OF_BILE_SALTS_AND_ORGANIC_ACIDS_METAL_IONS_AND_AMINE_COMPOUNDS |
| 12:40348056  | <i>LRRK2_2</i>  | REACTOME_TRANSPORT_OF_BILE_SALTS_AND_ORGANIC_ACIDS_METAL_IONS_AND_AMINE_COMPOUNDS |
| 12:40349236  | <i>LRRK2_2</i>  | REACTOME_TRANSPORT_OF_BILE_SALTS_AND_ORGANIC_ACIDS_METAL_IONS_AND_AMINE_COMPOUNDS |
| 12:40378773  | <i>LRRK2_2</i>  | REACTOME_TRANSPORT_OF_BILE_SALTS_AND_ORGANIC_ACIDS_METAL_IONS_AND_AMINE_COMPOUNDS |
| 12:40393852  | <i>LRRK2_2</i>  | REACTOME_TRANSPORT_OF_BILE_SALTS_AND_ORGANIC_ACIDS_METAL_IONS_AND_AMINE_COMPOUNDS |
| 12:40405478  | <i>LRRK2_2</i>  | REACTOME_TRANSPORT_OF_BILE_SALTS_AND_ORGANIC_ACIDS_METAL_IONS_AND_AMINE_COMPOUNDS |
| 12:40413305  | <i>LRRK2_2</i>  | REACTOME_TRANSPORT_OF_BILE_SALTS_AND_ORGANIC_ACIDS_METAL_IONS_AND_AMINE_COMPOUNDS |
| 12:40414626  | <i>LRRK2_2</i>  | REACTOME_TRANSPORT_OF_BILE_SALTS_AND_ORGANIC_ACIDS_METAL_IONS_AND_AMINE_COMPOUNDS |
| 12:40437969  | <i>LRRK2_2</i>  | REACTOME_TRANSPORT_OF_BILE_SALTS_AND_ORGANIC_ACIDS_METAL_IONS_AND_AMINE_COMPOUNDS |
| 1:205884274  | <i>RAB29</i>    | REACTOME_TRANSPORT_OF_INORGANIC_CATIONS_ANIONS_AND_AMINO_ACIDS_OLIGOPEPTIDES      |
| 8:17427186   | <i>FGF20</i>    | REACTOME_TRANSPORT_OF_INORGANIC_CATIONS_ANIONS_AND_AMINO_ACIDS_OLIGOPEPTIDES      |
| 12:47192323  | <i>SCAF11</i>   | REACTOME_TRANSPORT_OF_INORGANIC_CATIONS_ANIONS_AND_AMINO_ACIDS_OLIGOPEPTIDES      |
| 17:42338993  | <i>FAM171A2</i> | REACTOME_TRANSPORT_OF_INORGANIC_CATIONS_ANIONS_AND_AMINO_ACIDS_OLIGOPEPTIDES      |
| 1:154306180  | <i>GBAP1</i>    | REACTOME_TRANSPORT_OF_SMALL_MOLECULES                                             |
| 1:205645310  | <i>RAB29</i>    | REACTOME_TRANSPORT_OF_SMALL_MOLECULES                                             |
| 1:205884274  | <i>RAB29</i>    | REACTOME_TRANSPORT_OF_SMALL_MOLECULES                                             |
| 3:48835245   | <i>IP6K2</i>    | REACTOME_TRANSPORT_OF_SMALL_MOLECULES                                             |
| 3:123057397  | <i>KPNA1</i>    | REACTOME_TRANSPORT_OF_SMALL_MOLECULES                                             |
| 4:15608677   | <i>BST1</i>     | REACTOME_TRANSPORT_OF_SMALL_MOLECULES                                             |
| 4:114424939  | <i>CAMK2D</i>   | REACTOME_TRANSPORT_OF_SMALL_MOLECULES                                             |
| 4:170563153  | <i>CLCN3</i>    | REACTOME_TRANSPORT_OF_SMALL_MOLECULES                                             |
| 4:170569172  | <i>CLCN3</i>    | REACTOME_TRANSPORT_OF_SMALL_MOLECULES                                             |
| 4:170620812  | <i>CLCN3</i>    | REACTOME_TRANSPORT_OF_SMALL_MOLECULES                                             |
| 6:31846234   | <i>HLA-DRB5</i> | REACTOME_TRANSPORT_OF_SMALL_MOLECULES                                             |
| 6:32151443   | <i>HLA-DRB5</i> | REACTOME_TRANSPORT_OF_SMALL_MOLECULES                                             |
| 6:32814942   | <i>HLA-DRB5</i> | REACTOME_TRANSPORT_OF_SMALL_MOLECULES                                             |
| 8:17427186   | <i>FGF20</i>    | REACTOME_TRANSPORT_OF_SMALL_MOLECULES                                             |
| 12:39960237  | <i>LRRK2_2</i>  | REACTOME_TRANSPORT_OF_SMALL_MOLECULES                                             |
| 12:40240262  | <i>LRRK2_2</i>  | REACTOME_TRANSPORT_OF_SMALL_MOLECULES                                             |
| 12:40252360  | <i>LRRK2_2</i>  | REACTOME_TRANSPORT_OF_SMALL_MOLECULES                                             |
| 12:40267539  | <i>LRRK2_2</i>  | REACTOME_TRANSPORT_OF_SMALL_MOLECULES                                             |
| 12:40302599  | <i>LRRK2_2</i>  | REACTOME_TRANSPORT_OF_SMALL_MOLECULES                                             |
| 12:40348056  | <i>LRRK2_2</i>  | REACTOME_TRANSPORT_OF_SMALL_MOLECULES                                             |
| 12:40349236  | <i>LRRK2_2</i>  | REACTOME_TRANSPORT_OF_SMALL_MOLECULES                                             |
| 12:40378773  | <i>LRRK2_2</i>  | REACTOME_TRANSPORT_OF_SMALL_MOLECULES                                             |
| 12:40393852  | <i>LRRK2_2</i>  | REACTOME_TRANSPORT_OF_SMALL_MOLECULES                                             |
| 12:40405478  | <i>LRRK2_2</i>  | REACTOME_TRANSPORT_OF_SMALL_MOLECULES                                             |
| 12:40413305  | <i>LRRK2_2</i>  | REACTOME_TRANSPORT_OF_SMALL_MOLECULES                                             |
| 12:40414626  | <i>LRRK2_2</i>  | REACTOME_TRANSPORT_OF_SMALL_MOLECULES                                             |
| 12:40437969  | <i>LRRK2_2</i>  | REACTOME_TRANSPORT_OF_SMALL_MOLECULES                                             |
| 12:45755099  | <i>SCAF11</i>   | REACTOME_TRANSPORT_OF_SMALL_MOLECULES                                             |
| 12:47192323  | <i>SCAF11</i>   | REACTOME_TRANSPORT_OF_SMALL_MOLECULES                                             |
| 12:123453034 | <i>HIP1R</i>    | REACTOME_TRANSPORT_OF_SMALL_MOLECULES                                             |
| 12:124219791 | <i>HIP1R</i>    | REACTOME_TRANSPORT_OF_SMALL_MOLECULES                                             |
| 17:7560294   | <i>V1NB1</i>    | REACTOME_TRANSPORT_OF_SMALL_MOLECULES                                             |
| 17:40938261  | <i>RETREG3</i>  | REACTOME_TRANSPORT_OF_SMALL_MOLECULES                                             |
| 17:42338993  | <i>FAM171A2</i> | REACTOME_TRANSPORT_OF_SMALL_MOLECULES                                             |
| 19:1811130   | <i>SPPL2B</i>   | REACTOME_TRANSPORT_OF_SMALL_MOLECULES                                             |
| 2:134977261  | <i>TMEM163</i>  | REACTOME_TRANSPORT_TO_THE_GOLGI_AND_SUBSEQUENT_MODIFICATION                       |
| 2:135194840  | <i>TMEM163</i>  | REACTOME_TRANSPORT_TO_THE_GOLGI_AND_SUBSEQUENT_MODIFICATION                       |
| 2:135202455  | <i>TMEM163</i>  | REACTOME_TRANSPORT_TO_THE_GOLGI_AND_SUBSEQUENT_MODIFICATION                       |

|              |                     |                                                                        |
|--------------|---------------------|------------------------------------------------------------------------|
| 3:121411876  | <i>KPNA1</i>        | REACTOME_TRANSPORT_TO_THE_GOLGI_AND_SUBSEQUENT_MODIFICATION            |
| 3:121412702  | <i>KPNA1</i>        | REACTOME_TRANSPORT_TO_THE_GOLGI_AND_SUBSEQUENT_MODIFICATION            |
| 4:76695927   | <i>FAM47E-STBD1</i> | REACTOME_TRANSPORT_TO_THE_GOLGI_AND_SUBSEQUENT_MODIFICATION            |
| 4:113938109  | <i>CAMK2D</i>       | REACTOME_TRANSPORT_TO_THE_GOLGI_AND_SUBSEQUENT_MODIFICATION            |
| 4:114077386  | <i>CAMK2D</i>       | REACTOME_TRANSPORT_TO_THE_GOLGI_AND_SUBSEQUENT_MODIFICATION            |
| 4:114217997  | <i>CAMK2D</i>       | REACTOME_TRANSPORT_TO_THE_GOLGI_AND_SUBSEQUENT_MODIFICATION            |
| 10:104005410 | <i>GBF1</i>         | REACTOME_TRANSPORT_TO_THE_GOLGI_AND_SUBSEQUENT_MODIFICATION            |
| 10:104034550 | <i>GBF1</i>         | REACTOME_TRANSPORT_TO_THE_GOLGI_AND_SUBSEQUENT_MODIFICATION            |
| 10:104258303 | <i>GBF1</i>         | REACTOME_TRANSPORT_TO_THE_GOLGI_AND_SUBSEQUENT_MODIFICATION            |
| 10:121683206 | <i>INPP5F</i>       | REACTOME_TRANSPORT_TO_THE_GOLGI_AND_SUBSEQUENT_MODIFICATION            |
| 10:121686714 | <i>INPP5F</i>       | REACTOME_TRANSPORT_TO_THE_GOLGI_AND_SUBSEQUENT_MODIFICATION            |
| 10:121689030 | <i>INPP5F</i>       | REACTOME_TRANSPORT_TO_THE_GOLGI_AND_SUBSEQUENT_MODIFICATION            |
| 17:44800946  | <i>WNT3</i>         | REACTOME_TRANSPORT_TO_THE_GOLGI_AND_SUBSEQUENT_MODIFICATION            |
| 17:44833217  | <i>WNT3</i>         | REACTOME_TRANSPORT_TO_THE_GOLGI_AND_SUBSEQUENT_MODIFICATION            |
| 17:45059032  | <i>WNT3</i>         | REACTOME_TRANSPORT_TO_THE_GOLGI_AND_SUBSEQUENT_MODIFICATION            |
| 17:45089680  | <i>WNT3</i>         | REACTOME_TRANSPORT_TO_THE_GOLGI_AND_SUBSEQUENT_MODIFICATION            |
| 6:32151443   | <i>HLA-DRB5</i>     | REACTOME_TRIF_TICAM1_MEDIATED_TLR4_SIGNALING                           |
| 10:103185542 | <i>GBF1</i>         | REACTOME_TRIF_TICAM1_MEDIATED_TLR4_SIGNALING                           |
| 10:103308244 | <i>GBF1</i>         | REACTOME_TRIF_TICAM1_MEDIATED_TLR4_SIGNALING                           |
| 16:50730088  | <i>CASC16</i>       | REACTOME_TRIF_TICAM1_MEDIATED_TLR4_SIGNALING                           |
| 16:50730446  | <i>CASC16</i>       | REACTOME_TRIF_TICAM1_MEDIATED_TLR4_SIGNALING                           |
| 16:50745926  | <i>CASC16</i>       | REACTOME_TRIF_TICAM1_MEDIATED_TLR4_SIGNALING                           |
| 6:31758240   | <i>HLA-DRB5</i>     | REACTOME_TRNA_AMINOACYLATION                                           |
| 6:31762311   | <i>HLA-DRB5</i>     | REACTOME_TRNA_AMINOACYLATION                                           |
| 16:19085298  | <i>SYT17</i>        | REACTOME_UBIQUINOL_BIOSYNTHESIS                                        |
| 3:48199695   | <i>IP6K2</i>        | REACTOME_UB_SPECIFIC_PROCESSING_PROTEASES                              |
| 3:48214438   | <i>IP6K2</i>        | REACTOME_UB_SPECIFIC_PROCESSING_PROTEASES                              |
| 3:49740895   | <i>IP6K2</i>        | REACTOME_UB_SPECIFIC_PROCESSING_PROTEASES                              |
| 6:32814942   | <i>HLA-DRB5</i>     | REACTOME_UB_SPECIFIC_PROCESSING_PROTEASES                              |
| 17:7578671   | <i>V1NB1</i>        | REACTOME_UB_SPECIFIC_PROCESSING_PROTEASES                              |
| 6:32814942   | <i>HLA-DRB5</i>     | REACTOME_UCH_PROTEINASES                                               |
| 4:114424939  | <i>CAMK2D</i>       | REACTOME_UNBLOCKING_OF_NMDA_RECEPTORS_GLUTAMATE_BINDING_AND_ACTIVATION |
| 11:83188607  | <i>DLG2</i>         | REACTOME_UNBLOCKING_OF_NMDA_RECEPTORS_GLUTAMATE_BINDING_AND_ACTIVATION |
| 11:83219006  | <i>DLG2</i>         | REACTOME_UNBLOCKING_OF_NMDA_RECEPTORS_GLUTAMATE_BINDING_AND_ACTIVATION |
| 11:83538733  | <i>DLG2</i>         | REACTOME_UNBLOCKING_OF_NMDA_RECEPTORS_GLUTAMATE_BINDING_AND_ACTIVATION |
| 11:83544472  | <i>DLG2</i>         | REACTOME_UNBLOCKING_OF_NMDA_RECEPTORS_GLUTAMATE_BINDING_AND_ACTIVATION |
| 11:83656201  | <i>DLG2</i>         | REACTOME_UNBLOCKING_OF_NMDA_RECEPTORS_GLUTAMATE_BINDING_AND_ACTIVATION |
| 11:83700228  | <i>DLG2</i>         | REACTOME_UNBLOCKING_OF_NMDA_RECEPTORS_GLUTAMATE_BINDING_AND_ACTIVATION |
| 11:83762918  | <i>DLG2</i>         | REACTOME_UNBLOCKING_OF_NMDA_RECEPTORS_GLUTAMATE_BINDING_AND_ACTIVATION |
| 11:83894247  | <i>DLG2</i>         | REACTOME_UNBLOCKING_OF_NMDA_RECEPTORS_GLUTAMATE_BINDING_AND_ACTIVATION |
| 11:84021037  | <i>DLG2</i>         | REACTOME_UNBLOCKING_OF_NMDA_RECEPTORS_GLUTAMATE_BINDING_AND_ACTIVATION |
| 11:84324361  | <i>DLG2</i>         | REACTOME_UNBLOCKING_OF_NMDA_RECEPTORS_GLUTAMATE_BINDING_AND_ACTIVATION |
| 11:84373496  | <i>DLG2</i>         | REACTOME_UNBLOCKING_OF_NMDA_RECEPTORS_GLUTAMATE_BINDING_AND_ACTIVATION |
| 11:84403409  | <i>DLG2</i>         | REACTOME_UNBLOCKING_OF_NMDA_RECEPTORS_GLUTAMATE_BINDING_AND_ACTIVATION |
| 17:7101771   | <i>V1NB1</i>        | REACTOME_UNBLOCKING_OF_NMDA_RECEPTORS_GLUTAMATE_BINDING_AND_ACTIVATION |
| 1:156059276  | <i>GBAP1</i>        | REACTOME_UNFOLDED_PROTEIN_RESPONSE_UPR                                 |
| 1:161875645  | <i>FCGR2A</i>       | REACTOME_UNFOLDED_PROTEIN_RESPONSE_UPR                                 |
| 1:161930954  | <i>FCGR2A</i>       | REACTOME_UNFOLDED_PROTEIN_RESPONSE_UPR                                 |
| 3:150298317  | <i>MED12L</i>       | REACTOME_UNFOLDED_PROTEIN_RESPONSE_UPR                                 |
| 17:45059032  | <i>WNT3</i>         | REACTOME_UNFOLDED_PROTEIN_RESPONSE_UPR                                 |
| 17:45089680  | <i>WNT3</i>         | REACTOME_UNFOLDED_PROTEIN_RESPONSE_UPR                                 |
| 20:5934513   | <i>CRLS1</i>        | REACTOME_UNWINDING_OF_DNA                                              |
| 20:5968737   | <i>CRLS1</i>        | REACTOME_UNWINDING_OF_DNA                                              |

|              |                     |                                                                       |
|--------------|---------------------|-----------------------------------------------------------------------|
| 20:5968964   | <i>CRLS1</i>        | REACTOME_UNWINDING_OF_DNA                                             |
| 16:31004169  | <i>SETD1A</i>       | REACTOME_UPTAKE_AND_ACTIONS_OF_BACTERIAL_TOXINS                       |
| 3:48835245   | <i>IP6K2</i>        | REACTOME_VASOPRESSIN_REGULATES_RENAL_WATER_HOMEOSTASIS_VIA_AQUAPORINS |
| 3:123057397  | <i>KPNA1</i>        | REACTOME_VASOPRESSIN_REGULATES_RENAL_WATER_HOMEOSTASIS_VIA_AQUAPORINS |
| 17:39883520  | <i>RETREG3</i>      | REACTOME_VEGFR2_MEDIATED_VASCULAR_PERMEABILITY                        |
| 1:155847427  | <i>GBAP1</i>        | REACTOME_VESICLE_MEDIATED_TRANSPORT                                   |
| 1:171689486  | <i>VAMP4</i>        | REACTOME_VESICLE_MEDIATED_TRANSPORT                                   |
| 1:171945488  | <i>VAMP4</i>        | REACTOME_VESICLE_MEDIATED_TRANSPORT                                   |
| 1:172137119  | <i>VAMP4</i>        | REACTOME_VESICLE_MEDIATED_TRANSPORT                                   |
| 1:172386261  | <i>VAMP4</i>        | REACTOME_VESICLE_MEDIATED_TRANSPORT                                   |
| 2:135921205  | <i>TMEM163</i>      | REACTOME_VESICLE_MEDIATED_TRANSPORT                                   |
| 2:169999639  | <i>STK39</i>        | REACTOME_VESICLE_MEDIATED_TRANSPORT                                   |
| 2:170028024  | <i>STK39</i>        | REACTOME_VESICLE_MEDIATED_TRANSPORT                                   |
| 3:121411876  | <i>KPNA1</i>        | REACTOME_VESICLE_MEDIATED_TRANSPORT                                   |
| 3:121412702  | <i>KPNA1</i>        | REACTOME_VESICLE_MEDIATED_TRANSPORT                                   |
| 4:925376     | <i>GAK</i>          | REACTOME_VESICLE_MEDIATED_TRANSPORT                                   |
| 4:76695927   | <i>FAM47E-STBD1</i> | REACTOME_VESICLE_MEDIATED_TRANSPORT                                   |
| 4:77100807   | <i>FAM47E-STBD1</i> | REACTOME_VESICLE_MEDIATED_TRANSPORT                                   |
| 4:77104152   | <i>FAM47E-STBD1</i> | REACTOME_VESICLE_MEDIATED_TRANSPORT                                   |
| 4:77124196   | <i>FAM47E-STBD1</i> | REACTOME_VESICLE_MEDIATED_TRANSPORT                                   |
| 4:77134786   | <i>FAM47E-STBD1</i> | REACTOME_VESICLE_MEDIATED_TRANSPORT                                   |
| 4:113938109  | <i>CAMK2D</i>       | REACTOME_VESICLE_MEDIATED_TRANSPORT                                   |
| 4:114077386  | <i>CAMK2D</i>       | REACTOME_VESICLE_MEDIATED_TRANSPORT                                   |
| 4:114217997  | <i>CAMK2D</i>       | REACTOME_VESICLE_MEDIATED_TRANSPORT                                   |
| 8:17125768   | <i>FGF20</i>        | REACTOME_VESICLE_MEDIATED_TRANSPORT                                   |
| 9:17579690   | <i>SH3GL2_2</i>     | REACTOME_VESICLE_MEDIATED_TRANSPORT                                   |
| 9:17609302   | <i>SH3GL2_2</i>     | REACTOME_VESICLE_MEDIATED_TRANSPORT                                   |
| 9:17627444   | <i>SH3GL2_2</i>     | REACTOME_VESICLE_MEDIATED_TRANSPORT                                   |
| 9:17710876   | <i>SH3GL2_2</i>     | REACTOME_VESICLE_MEDIATED_TRANSPORT                                   |
| 9:17732590   | <i>SH3GL2_2</i>     | REACTOME_VESICLE_MEDIATED_TRANSPORT                                   |
| 9:17737514   | <i>SH3GL2_2</i>     | REACTOME_VESICLE_MEDIATED_TRANSPORT                                   |
| 9:17758945   | <i>SH3GL2_2</i>     | REACTOME_VESICLE_MEDIATED_TRANSPORT                                   |
| 10:104005410 | <i>GBF1</i>         | REACTOME_VESICLE_MEDIATED_TRANSPORT                                   |
| 10:104034550 | <i>GBF1</i>         | REACTOME_VESICLE_MEDIATED_TRANSPORT                                   |
| 10:104258303 | <i>GBF1</i>         | REACTOME_VESICLE_MEDIATED_TRANSPORT                                   |
| 10:121683206 | <i>INPP5F</i>       | REACTOME_VESICLE_MEDIATED_TRANSPORT                                   |
| 10:121686714 | <i>INPP5F</i>       | REACTOME_VESICLE_MEDIATED_TRANSPORT                                   |
| 10:121689030 | <i>INPP5F</i>       | REACTOME_VESICLE_MEDIATED_TRANSPORT                                   |
| 12:39759090  | <i>LRRK2_2</i>      | REACTOME_VESICLE_MEDIATED_TRANSPORT                                   |
| 12:123326598 | <i>HIP1R</i>        | REACTOME_VESICLE_MEDIATED_TRANSPORT                                   |
| 17:7129974   | <i>V1NB1</i>        | REACTOME_VESICLE_MEDIATED_TRANSPORT                                   |
| 17:43021962  | <i>CRHR1_2</i>      | REACTOME_VESICLE_MEDIATED_TRANSPORT                                   |
| 17:44800946  | <i>WNT3</i>         | REACTOME_VESICLE_MEDIATED_TRANSPORT                                   |
| 17:44833217  | <i>WNT3</i>         | REACTOME_VESICLE_MEDIATED_TRANSPORT                                   |
| 17:45059032  | <i>WNT3</i>         | REACTOME_VESICLE_MEDIATED_TRANSPORT                                   |
| 17:45089680  | <i>WNT3</i>         | REACTOME_VESICLE_MEDIATED_TRANSPORT                                   |
| 17:76727455  | <i>DNAH17</i>       | REACTOME_VESICLE_MEDIATED_TRANSPORT                                   |
| 6:32814942   | <i>HLA-DRB5</i>     | REACTOME_VIF_MEDIATED_DEGRADATION_OF_APOBEC3G                         |
| 2:169999639  | <i>STK39</i>        | REACTOME_VISUAL_PHOTOTRANSDUCTION                                     |
| 2:170028024  | <i>STK39</i>        | REACTOME_VISUAL_PHOTOTRANSDUCTION                                     |
| 10:15199347  | <i>ITGA8</i>        | REACTOME_VISUAL_PHOTOTRANSDUCTION                                     |
| 17:43132290  | <i>CRHR1_2</i>      | REACTOME_VISUAL_PHOTOTRANSDUCTION                                     |
| 6:133025715  | <i>RPS12</i>        | REACTOME_VITAMIN_B5_PANTOTHENATE_METABOLISM                           |

|              |               |                                                  |
|--------------|---------------|--------------------------------------------------|
| 6:133028870  | <i>RPS12</i>  | REACTOME_VITAMIN_B5_PANTOTHENATE_METABOLISM      |
| 6:133034076  | <i>RPS12</i>  | REACTOME_VITAMIN_B5_PANTOTHENATE_METABOLISM      |
| 2:169999639  | <i>STK39</i>  | REACTOME_VITAMIN_D_CALCIFEROL_METABOLISM         |
| 2:170028024  | <i>STK39</i>  | REACTOME_VITAMIN_D_CALCIFEROL_METABOLISM         |
| 2:18143082   | <i>KCNS3</i>  | REACTOME_VOLTAGE_GATED_POTASSIUM_CHANNELS        |
| 2:18176120   | <i>KCNS3</i>  | REACTOME_VOLTAGE_GATED_POTASSIUM_CHANNELS        |
| 2:18247777   | <i>KCNS3</i>  | REACTOME_VOLTAGE_GATED_POTASSIUM_CHANNELS        |
| 2:18296870   | <i>KCNS3</i>  | REACTOME_VOLTAGE_GATED_POTASSIUM_CHANNELS        |
| 2:18335515   | <i>KCNS3</i>  | REACTOME_VOLTAGE_GATED_POTASSIUM_CHANNELS        |
| 3:19312697   | <i>SATB1</i>  | REACTOME_VOLTAGE_GATED_POTASSIUM_CHANNELS        |
| 3:19334895   | <i>SATB1</i>  | REACTOME_VOLTAGE_GATED_POTASSIUM_CHANNELS        |
| 17:7832034   | <i>V1NB1</i>  | REACTOME_VOLTAGE_GATED_POTASSIUM_CHANNELS        |
| 8:131153067  | <i>FAM49B</i> | REACTOME_VXPX_CARGO_TARGETING_TO_CILIUM          |
| 8:131190319  | <i>FAM49B</i> | REACTOME_VXPX_CARGO_TARGETING_TO_CILIUM          |
| 8:131427864  | <i>FAM49B</i> | REACTOME_VXPX_CARGO_TARGETING_TO_CILIUM          |
| 10:104005410 | <i>GBF1</i>   | REACTOME_VXPX_CARGO_TARGETING_TO_CILIUM          |
| 10:104034550 | <i>GBF1</i>   | REACTOME_VXPX_CARGO_TARGETING_TO_CILIUM          |
| 17:7129974   | <i>V1NB1</i>  | REACTOME_WNT5A_DEPENDENT_INTERNALIZATION_OF_FZD4 |
| 17:44843651  | <i>WNT3</i>   | REACTOME_WNT_LIGAND_BIOGENESIS_AND_TRAFFICKING   |
| 17:44888209  | <i>WNT3</i>   | REACTOME_WNT_LIGAND_BIOGENESIS_AND_TRAFFICKING   |
| 17:44888715  | <i>WNT3</i>   | REACTOME_WNT_LIGAND_BIOGENESIS_AND_TRAFFICKING   |
| 17:44906949  | <i>WNT3</i>   | REACTOME_WNT_LIGAND_BIOGENESIS_AND_TRAFFICKING   |
| 17:44912901  | <i>WNT3</i>   | REACTOME_WNT_LIGAND_BIOGENESIS_AND_TRAFFICKING   |
| 17:44931399  | <i>WNT3</i>   | REACTOME_WNT_LIGAND_BIOGENESIS_AND_TRAFFICKING   |
| 17:44947756  | <i>WNT3</i>   | REACTOME_WNT_LIGAND_BIOGENESIS_AND_TRAFFICKING   |
| 17:7129974   | <i>V1NB1</i>  | REACTOME_WNT_MEDIATED_ACTIVATION_OF_DVL          |
| 17:7578671   | <i>V1NB1</i>  | SA_G1_AND_S_PHASES                               |
| 3:48199695   | <i>IP6K2</i>  | SA_G2_AND_M_PHASES                               |
| 3:48214438   | <i>IP6K2</i>  | SA_G2_AND_M_PHASES                               |
| 4:170477125  | <i>CLCN3</i>  | SA_G2_AND_M_PHASES                               |
| 3:49406095   | <i>IP6K2</i>  | SA_TRKA_RECEPTOR                                 |
| 3:49424231   | <i>IP6K2</i>  | SA_TRKA_RECEPTOR                                 |
| 3:49450137   | <i>IP6K2</i>  | SA_TRKA_RECEPTOR                                 |
| 3:49561208   | <i>IP6K2</i>  | SIG_BCR_SIGNALING_PATHWAY                        |
| 10:103185542 | <i>GBF1</i>   | WNT_SIGNALING                                    |
| 10:103308244 | <i>GBF1</i>   | WNT_SIGNALING                                    |
| 17:7129974   | <i>V1NB1</i>  | WNT_SIGNALING                                    |
| 17:44843651  | <i>WNT3</i>   | WNT_SIGNALING                                    |
| 17:44888209  | <i>WNT3</i>   | WNT_SIGNALING                                    |
| 17:44888715  | <i>WNT3</i>   | WNT_SIGNALING                                    |
| 17:44906949  | <i>WNT3</i>   | WNT_SIGNALING                                    |
| 19:3022354   | <i>SPPL2B</i> | WNT_SIGNALING                                    |
| 19:3036350   | <i>SPPL2B</i> | WNT_SIGNALING                                    |

**Supplementary Table 5. Gene prioritization based on pleiotropy across significant gene-sets associated with Parkinson's disease**

[illegible]

Supplementary Table 6. Canonical pathways significantly associated with PD risk through rare variation excluding PD known risk loci +/- 1Mb upstream and downstream

| Gene Set                              | Functional subcategory | MAF < 3 |          | MAF < 1 |          |
|---------------------------------------|------------------------|---------|----------|---------|----------|
|                                       |                        | Num SNP | SKAT-O P | Num SNP | SKAT-O P |
| ADAPTIVE IMMUNE SYSTEM (REACTOME)     | Missense               | 3075    | 0.163    | 2871    | 0.123    |
|                                       | Loss of function       | 1559    | 0.010    | 1438    | 1.23E-02 |
|                                       | CADD > 12 %            | 86      | 0.847    | 80      | 1        |
| INNATE IMMUNE SYSTEM (REACTOME)       | Missense               | 6587    | 0.002    | 6123    | 6.72E-04 |
|                                       | Loss of function       | 2672    | 0.030    | 2445    | 0.107    |
|                                       | CADD > 12 %            | 169     | 0.899    | 160     | 0.807    |
| METABOLISM OF LIPIDS (REACTOME)       | Missense               | 3648    | 0.815    | 3398    | 0.399    |
|                                       | Loss of function       | 1709    | 0.743    | 1552    | 0.822    |
|                                       | CADD > 12 %            | 141     | 0.765    | 130     | 0.698    |
| NEUTROPHIL DEGRANULATION (REACTOME)   | Missense               | 2417    | 0.237    | 2243    | 0.080    |
|                                       | Loss of function       | 1049    | 0.454    | 944     | 1        |
|                                       | CADD > 12 %            | 91      | 0.730    | 84      | 0.790    |
| SIGNALING BY GPCR (REACTOME)          | Missense               | 5406    | 3.86E-04 | 4963    | 1.08E-06 |
|                                       | Loss of function       | 1467    | 0.360    | 1333    | 0.699    |
|                                       | CADD > 12 %            | 129     | 0.075    | 120     | 0.182    |
| VESICLE MEDIATED TRANSPORT (REACTOME) | Missense               | 3300    | 0.909    | 3060    | 0.268    |
|                                       | Loss of function       | 1628    | 0.851    | 1468    | 0.060    |
|                                       | CADD > 12 %            | 81      | 1        | 77      | 1        |

Supplementary Table 7. Gene prioritization per functionality category based on Sequence Kernel Association Test analysis

a) MISSENSE VARIANTS

| Gene            | NumVar | Q        | Pvalue | Gene-set           |
|-----------------|--------|----------|--------|--------------------|
| <i>NDUFA10</i>  | 3      | 3.11E+04 | 0.001  | ALZHEIMERS DISEASE |
| <i>TNFRSF1A</i> | 5      | 3.60E+04 | 0.003  | ALZHEIMERS DISEASE |
| <i>NDUFS8</i>   | 9      | 2.11E+04 | 0.008  | ALZHEIMERS DISEASE |
| <i>APAF1</i>    | 13     | 3.41E+04 | 0.020  | ALZHEIMERS DISEASE |
| <i>APP</i>      | 2      | 3.42E+03 | 0.021  | ALZHEIMERS DISEASE |
| <i>UQCR10</i>   | 1      | 7.97E+03 | 0.037  | ALZHEIMERS DISEASE |
| <i>UQCR11</i>   | 1      | 6.97E+02 | 0.047  | ALZHEIMERS DISEASE |
| <i>NDUFS7</i>   | 10     | 4.16E+04 | 0.058  | ALZHEIMERS DISEASE |
| <i>COX7A1</i>   | 2      | 1.95E+03 | 0.075  | ALZHEIMERS DISEASE |
| <i>ATF6</i>     | 6      | 2.58E+04 | 0.077  | ALZHEIMERS DISEASE |
| <i>NDUFA7</i>   | 2      | 1.24E+04 | 0.077  | ALZHEIMERS DISEASE |
| <i>ITPR1</i>    | 13     | 3.91E+04 | 0.079  | ALZHEIMERS DISEASE |
| <i>PSEN2</i>    | 4      | 1.17E+04 | 0.080  | ALZHEIMERS DISEASE |
| <i>COX6B2</i>   | 1      | 2.21E+03 | 0.107  | ALZHEIMERS DISEASE |
| <i>NDUFS5</i>   | 1      | 4.64E+02 | 0.109  | ALZHEIMERS DISEASE |
| <i>CASP7</i>    | 8      | 1.19E+04 | 0.134  | ALZHEIMERS DISEASE |
| <i>NDUFS6</i>   | 1      | 4.30E+02 | 0.135  | ALZHEIMERS DISEASE |
| <i>NDUFB5</i>   | 1      | 6.02E+03 | 0.159  | ALZHEIMERS DISEASE |
| <i>PPP3R2</i>   | 3      | 4.96E+03 | 0.163  | ALZHEIMERS DISEASE |
| <i>GAPDH</i>    | 3      | 1.29E+03 | 0.165  | ALZHEIMERS DISEASE |
| <i>COX6A2</i>   | 2      | 4.59E+03 | 0.168  | ALZHEIMERS DISEASE |
| <i>PLCB2</i>    | 12     | 1.50E+04 | 0.196  | ALZHEIMERS DISEASE |
| <i>CALM2</i>    | 1      | 3.38E+02 | 0.198  | ALZHEIMERS DISEASE |
| <i>ADAM10</i>   | 2      | 1.51E+03 | 0.202  | ALZHEIMERS DISEASE |
| <i>PSEN1</i>    | 1      | 5.96E+03 | 0.209  | ALZHEIMERS DISEASE |
| <i>CACNA1D</i>  | 16     | 1.44E+04 | 0.211  | ALZHEIMERS DISEASE |
| <i>CHP2</i>     | 3      | 2.91E+03 | 0.217  | ALZHEIMERS DISEASE |
| <i>BID</i>      | 1      | 5.61E+03 | 0.220  | ALZHEIMERS DISEASE |
| <i>ATP2A3</i>   | 13     | 2.29E+04 | 0.229  | ALZHEIMERS DISEASE |
| <i>NDUFA9</i>   | 5      | 8.13E+03 | 0.240  | ALZHEIMERS DISEASE |
| <i>APBB1</i>    | 9      | 1.26E+04 | 0.243  | ALZHEIMERS DISEASE |
| <i>PPP3CA</i>   | 2      | 8.30E+02 | 0.249  | ALZHEIMERS DISEASE |
| <i>NDUFA2</i>   | 2      | 1.54E+03 | 0.275  | ALZHEIMERS DISEASE |
| <i>GRIN2D</i>   | 3      | 4.55E+03 | 0.287  | ALZHEIMERS DISEASE |
| <i>UQCRCB</i>   | 1      | 3.58E+02 | 0.292  | ALZHEIMERS DISEASE |
| <i>SDHB</i>     | 2      | 6.63E+03 | 0.299  | ALZHEIMERS DISEASE |
| <i>PPP3CC</i>   | 1      | 3.03E+03 | 0.303  | ALZHEIMERS DISEASE |
| <i>NDUFA4L2</i> | 1      | 3.40E+02 | 0.307  | ALZHEIMERS DISEASE |
| <i>LPL</i>      | 4      | 1.26E+04 | 0.316  | ALZHEIMERS DISEASE |
| <i>NDUFB3</i>   | 4      | 2.55E+03 | 0.350  | ALZHEIMERS DISEASE |
| <i>COX6A1</i>   | 3      | 1.24E+03 | 0.358  | ALZHEIMERS DISEASE |
| <i>NAE1</i>     | 2      | 6.58E+02 | 0.369  | ALZHEIMERS DISEASE |
| <i>PLCB1</i>    | 8      | 6.14E+03 | 0.392  | ALZHEIMERS DISEASE |
| <i>NOS1</i>     | 17     | 1.54E+04 | 0.393  | ALZHEIMERS DISEASE |
| <i>ITPR2</i>    | 10     | 9.65E+03 | 0.393  | ALZHEIMERS DISEASE |
| <i>CAPN2</i>    | 10     | 1.01E+04 | 0.395  | ALZHEIMERS DISEASE |
| <i>NDUFS4</i>   | 2      | 4.76E+02 | 0.396  | ALZHEIMERS DISEASE |
| <i>FAS</i>      | 2      | 2.34E+03 | 0.420  | ALZHEIMERS DISEASE |
| <i>BAD</i>      | 2      | 4.85E+02 | 0.424  | ALZHEIMERS DISEASE |
| <i>NDUFS3</i>   | 1      | 9.32E+02 | 0.436  | ALZHEIMERS DISEASE |
| <i>BACE2</i>    | 2      | 2.87E+03 | 0.439  | ALZHEIMERS DISEASE |
| <i>NDUFB6</i>   | 2      | 6.88E+02 | 0.440  | ALZHEIMERS DISEASE |
| <i>NDUFB9</i>   | 1      | 4.30E+02 | 0.443  | ALZHEIMERS DISEASE |
| <i>CYC1</i>     | 5      | 3.74E+03 | 0.448  | ALZHEIMERS DISEASE |
| <i>COX4I1</i>   | 2      | 1.10E+03 | 0.451  | ALZHEIMERS DISEASE |
| <i>NDUFA3</i>   | 1      | 1.99E+03 | 0.452  | ALZHEIMERS DISEASE |
| <i>SDHD</i>     | 4      | 9.99E+03 | 0.452  | ALZHEIMERS DISEASE |
| <i>UQCRC1</i>   | 6      | 6.87E+03 | 0.454  | ALZHEIMERS DISEASE |
| <i>COX8C</i>    | 1      | 1.25E+03 | 0.465  | ALZHEIMERS DISEASE |
| <i>COX7A2L</i>  | 2      | 6.42E+02 | 0.468  | ALZHEIMERS DISEASE |
| <i>IDE</i>      | 3      | 1.10E+03 | 0.469  | ALZHEIMERS DISEASE |
| <i>GRIN2A</i>   | 9      | 9.26E+03 | 0.475  | ALZHEIMERS DISEASE |
| <i>ADAM17</i>   | 6      | 7.75E+03 | 0.505  | ALZHEIMERS DISEASE |
| <i>NDUFS2</i>   | 3      | 2.06E+03 | 0.544  | ALZHEIMERS DISEASE |
| <i>PLCB4</i>    | 7      | 4.27E+03 | 0.544  | ALZHEIMERS DISEASE |
| <i>COX5B</i>    | 1      | 1.23E+02 | 0.550  | ALZHEIMERS DISEASE |
| <i>GRIN2C</i>   | 12     | 8.47E+03 | 0.564  | ALZHEIMERS DISEASE |
| <i>NCSTN</i>    | 5      | 2.13E+03 | 0.575  | ALZHEIMERS DISEASE |

|         |    |          |       |                    |
|---------|----|----------|-------|--------------------|
| NDUFB10 | 1  | 4.50E+01 | 0.589 | ALZHEIMERS DISEASE |
| CASP9   | 8  | 6.15E+03 | 0.602 | ALZHEIMERS DISEASE |
| SDHA    | 2  | 4.17E+02 | 0.608 | ALZHEIMERS DISEASE |
| PLCB3   | 7  | 6.74E+03 | 0.611 | ALZHEIMERS DISEASE |
| CAPN1   | 7  | 2.70E+03 | 0.618 | ALZHEIMERS DISEASE |
| ITPR3   | 15 | 4.94E+03 | 0.623 | ALZHEIMERS DISEASE |
| NDUFA6  | 1  | 3.99E+02 | 0.625 | ALZHEIMERS DISEASE |
| CALML3  | 1  | 3.54E+01 | 0.670 | ALZHEIMERS DISEASE |
| NDUFV1  | 1  | 4.58E+01 | 0.671 | ALZHEIMERS DISEASE |
| CALML5  | 2  | 7.99E+02 | 0.680 | ALZHEIMERS DISEASE |
| CACNA1C | 14 | 4.13E+03 | 0.694 | ALZHEIMERS DISEASE |
| ERN1    | 5  | 3.81E+03 | 0.707 | ALZHEIMERS DISEASE |
| CACNA1S | 22 | 1.57E+04 | 0.707 | ALZHEIMERS DISEASE |
| SDHC    | 3  | 2.73E+03 | 0.715 | ALZHEIMERS DISEASE |
| EIF2AK3 | 7  | 1.67E+03 | 0.733 | ALZHEIMERS DISEASE |
| TNF     | 1  | 1.53E+02 | 0.736 | ALZHEIMERS DISEASE |
| COX5A   | 4  | 6.19E+02 | 0.750 | ALZHEIMERS DISEASE |
| MAPT    | 10 | 5.37E+03 | 0.751 | ALZHEIMERS DISEASE |
| COX4I2  | 3  | 3.59E+02 | 0.754 | ALZHEIMERS DISEASE |
| CALML6  | 1  | 3.16E+01 | 0.765 | ALZHEIMERS DISEASE |
| ATP2A1  | 2  | 1.28E+02 | 0.790 | ALZHEIMERS DISEASE |
| COX7A2  | 1  | 4.51E+01 | 0.796 | ALZHEIMERS DISEASE |
| RYR3    | 37 | 1.84E+04 | 0.815 | ALZHEIMERS DISEASE |
| APOE    | 4  | 4.35E+02 | 0.821 | ALZHEIMERS DISEASE |
| UQCRC2  | 3  | 3.68E+02 | 0.823 | ALZHEIMERS DISEASE |
| CDK5R1  | 1  | 8.77E+00 | 0.839 | ALZHEIMERS DISEASE |
| NDUFA5  | 3  | 2.42E+02 | 0.857 | ALZHEIMERS DISEASE |
| BACE1   | 3  | 5.41E+02 | 0.873 | ALZHEIMERS DISEASE |
| NDUFV3  | 7  | 7.46E+02 | 0.884 | ALZHEIMERS DISEASE |
| COX6B1  | 1  | 2.55E+00 | 0.911 | ALZHEIMERS DISEASE |
| UQCRHL  | 1  | 2.88E+00 | 0.915 | ALZHEIMERS DISEASE |
| COX6C   | 1  | 1.03E+01 | 0.939 | ALZHEIMERS DISEASE |
| IL1B    | 1  | 7.49E-01 | 0.950 | ALZHEIMERS DISEASE |
| CASP3   | 2  | 2.05E+02 | 1     | ALZHEIMERS DISEASE |
| NDUFS1  | 9  | 1.78E+01 | 1     | ALZHEIMERS DISEASE |
| CASP8   | 3  | 4.03E+02 | 1     | ALZHEIMERS DISEASE |
| MME     | 9  | 2.49E+03 | 1     | ALZHEIMERS DISEASE |
| ATP2A2  | 3  | 4.04E+00 | 1     | ALZHEIMERS DISEASE |
| LRP1    | 26 | 1.45E+04 | 1     | ALZHEIMERS DISEASE |
| MAPK3   | 5  | 2.78E+01 | 1     | ALZHEIMERS DISEASE |
| NDUFB1  | 3  | 6.84E+02 | 1     | ALZHEIMERS DISEASE |

| Gene      | NumVar | Q        | Pvalue | Gene-set                |
|-----------|--------|----------|--------|-------------------------|
| HIST1H2BA | 3      | 6.50E+03 | 0.003  | AMYLOID FIBER FORMATION |
| HIST2H2BE | 1      | 5.20E+03 | 0.009  | AMYLOID FIBER FORMATION |
| HIST1H2BE | 2      | 1.05E+04 | 0.019  | AMYLOID FIBER FORMATION |
| APH1B     | 5      | 2.03E+04 | 0.021  | AMYLOID FIBER FORMATION |
| HIST1H2BO | 1      | 8.61E+02 | 0.021  | AMYLOID FIBER FORMATION |
| APP       | 2      | 3.42E+03 | 0.021  | AMYLOID FIBER FORMATION |
| APOA4     | 9      | 2.92E+04 | 0.057  | AMYLOID FIBER FORMATION |
| HSPG2     | 81     | 1.01E+05 | 0.064  | AMYLOID FIBER FORMATION |
| HIST1H2AJ | 1      | 8.79E+02 | 0.065  | AMYLOID FIBER FORMATION |
| CALB1     | 1      | 5.50E+02 | 0.069  | AMYLOID FIBER FORMATION |
| HIST1H2BG | 2      | 1.64E+03 | 0.076  | AMYLOID FIBER FORMATION |
| RPS27A    | 1      | 2.69E+03 | 0.087  | AMYLOID FIBER FORMATION |
| PRKN      | 10     | 2.32E+04 | 0.093  | AMYLOID FIBER FORMATION |
| HIST2H3D  | 1      | 2.46E+03 | 0.095  | AMYLOID FIBER FORMATION |
| SORL1     | 23     | 7.24E+04 | 0.097  | AMYLOID FIBER FORMATION |
| HIST1H2BH | 1      | 7.15E+02 | 0.109  | AMYLOID FIBER FORMATION |
| HIST1H4F  | 1      | 3.78E+03 | 0.118  | AMYLOID FIBER FORMATION |
| SIAH2     | 3      | 1.50E+03 | 0.130  | AMYLOID FIBER FORMATION |
| PRL       | 2      | 1.18E+03 | 0.138  | AMYLOID FIBER FORMATION |
| APOA1     | 3      | 2.38E+03 | 0.160  | AMYLOID FIBER FORMATION |
| NAT8      | 10     | 1.75E+04 | 0.166  | AMYLOID FIBER FORMATION |
| ADAM10    | 2      | 1.51E+03 | 0.202  | AMYLOID FIBER FORMATION |
| CST3      | 1      | 4.78E+02 | 0.251  | AMYLOID FIBER FORMATION |
| FURIN     | 8      | 1.42E+04 | 0.262  | AMYLOID FIBER FORMATION |
| HIST1H2BI | 2      | 1.64E+03 | 0.267  | AMYLOID FIBER FORMATION |
| HIST1H4L  | 1      | 3.15E+03 | 0.268  | AMYLOID FIBER FORMATION |
| APCS      | 1      | 2.26E+03 | 0.276  | AMYLOID FIBER FORMATION |
| HIST1H2BB | 1      | 1.81E+02 | 0.305  | AMYLOID FIBER FORMATION |
| HIST1H4C  | 1      | 3.67E+02 | 0.307  | AMYLOID FIBER FORMATION |
| SEMG1     | 12     | 2.89E+04 | 0.317  | AMYLOID FIBER FORMATION |
| GGA3      | 15     | 2.69E+04 | 0.339  | AMYLOID FIBER FORMATION |

|                  |    |          |       |                         |
|------------------|----|----------|-------|-------------------------|
| <i>HIST1H3A</i>  | 2  | 7.92E+02 | 0.346 | AMYLOID FIBER FORMATION |
| <i>TGFBI</i>     | 7  | 4.29E+03 | 0.360 | AMYLOID FIBER FORMATION |
| <i>ITM2B</i>     | 2  | 4.91E+02 | 0.433 | AMYLOID FIBER FORMATION |
| <i>SNCAIP</i>    | 10 | 1.58E+04 | 0.434 | AMYLOID FIBER FORMATION |
| <i>GSN</i>       | 14 | 1.59E+04 | 0.440 | AMYLOID FIBER FORMATION |
| <i>NPPA</i>      | 2  | 1.63E+03 | 0.491 | AMYLOID FIBER FORMATION |
| <i>FGA</i>       | 7  | 1.83E+03 | 0.515 | AMYLOID FIBER FORMATION |
| <i>GGA2</i>      | 7  | 2.27E+03 | 0.541 | AMYLOID FIBER FORMATION |
| <i>ODAM</i>      | 2  | 1.31E+03 | 0.549 | AMYLOID FIBER FORMATION |
| <i>UBE2L6</i>    | 1  | 6.07E+01 | 0.557 | AMYLOID FIBER FORMATION |
| <i>HIST1H2AB</i> | 1  | 6.33E+01 | 0.573 | AMYLOID FIBER FORMATION |
| <i>NCSTN</i>     | 5  | 2.13E+03 | 0.575 | AMYLOID FIBER FORMATION |
| <i>SAA1</i>      | 6  | 3.52E+03 | 0.597 | AMYLOID FIBER FORMATION |
| <i>HIST1H2AD</i> | 2  | 1.86E+02 | 0.665 | AMYLOID FIBER FORMATION |
| <i>GGA1</i>      | 3  | 1.89E+03 | 0.671 | AMYLOID FIBER FORMATION |
| <i>HIST1H3G</i>  | 1  | 3.66E+01 | 0.702 | AMYLOID FIBER FORMATION |
| <i>MFGE8</i>     | 7  | 1.42E+03 | 0.707 | AMYLOID FIBER FORMATION |
| <i>CALCA</i>     | 3  | 5.33E+03 | 0.716 | AMYLOID FIBER FORMATION |
| <i>TTR</i>       | 1  | 1.45E+02 | 0.724 | AMYLOID FIBER FORMATION |
| <i>BACE1</i>     | 3  | 5.41E+02 | 0.873 | AMYLOID FIBER FORMATION |
| <i>LTF</i>       | 8  | 5.90E+02 | 0.900 | AMYLOID FIBER FORMATION |
| <i>B2M</i>       | 1  | 4.62E+00 | 0.913 | AMYLOID FIBER FORMATION |
| <i>TSPAN15</i>   | 4  | 2.55E+01 | 1     | AMYLOID FIBER FORMATION |

| Gene              | NumVar | Q        | Pvalue | Gene-set                          |
|-------------------|--------|----------|--------|-----------------------------------|
| <i>CSNK1D</i>     | 4      | 1.32E+04 | 0.002  | ASPARAGINE N LINKED GLYCOSYLATION |
| <i>MAN1B1</i>     | 15     | 3.58E+04 | 0.010  | ASPARAGINE N LINKED GLYCOSYLATION |
| <i>COG5</i>       | 10     | 3.93E+04 | 0.011  | ASPARAGINE N LINKED GLYCOSYLATION |
| <i>ARFGAP1</i>    | 8      | 2.88E+04 | 0.013  | ASPARAGINE N LINKED GLYCOSYLATION |
| <i>ENGASE</i>     | 15     | 4.17E+04 | 0.015  | ASPARAGINE N LINKED GLYCOSYLATION |
| <i>TUBB1</i>      | 8      | 4.79E+04 | 0.016  | ASPARAGINE N LINKED GLYCOSYLATION |
| <i>ST6GALNAC6</i> | 4      | 2.75E+04 | 0.016  | ASPARAGINE N LINKED GLYCOSYLATION |
| <i>COPG1</i>      | 3      | 5.26E+03 | 0.020  | ASPARAGINE N LINKED GLYCOSYLATION |
| <i>ST8SIA3</i>    | 2      | 2.68E+03 | 0.021  | ASPARAGINE N LINKED GLYCOSYLATION |
| <i>B4GALT1</i>    | 1      | 1.34E+03 | 0.022  | ASPARAGINE N LINKED GLYCOSYLATION |
| <i>VCP</i>        | 2      | 3.84E+03 | 0.022  | ASPARAGINE N LINKED GLYCOSYLATION |
| <i>ASGR1</i>      | 1      | 8.46E+02 | 0.023  | ASPARAGINE N LINKED GLYCOSYLATION |
| <i>ACTR10</i>     | 2      | 4.89E+03 | 0.029  | ASPARAGINE N LINKED GLYCOSYLATION |
| <i>EDEM1</i>      | 8      | 1.37E+04 | 0.030  | ASPARAGINE N LINKED GLYCOSYLATION |
| <i>DYNC1LI2</i>   | 2      | 2.58E+03 | 0.030  | ASPARAGINE N LINKED GLYCOSYLATION |
| <i>STT3A</i>      | 2      | 2.10E+03 | 0.031  | ASPARAGINE N LINKED GLYCOSYLATION |
| <i>MGAT1</i>      | 1      | 1.98E+03 | 0.036  | ASPARAGINE N LINKED GLYCOSYLATION |
| <i>DYNC1LI1</i>   | 5      | 2.20E+04 | 0.038  | ASPARAGINE N LINKED GLYCOSYLATION |
| <i>SLC17A5</i>    | 5      | 1.63E+04 | 0.054  | ASPARAGINE N LINKED GLYCOSYLATION |
| <i>TUBB8</i>      | 5      | 1.83E+04 | 0.058  | ASPARAGINE N LINKED GLYCOSYLATION |
| <i>NPL</i>        | 6      | 4.06E+03 | 0.060  | ASPARAGINE N LINKED GLYCOSYLATION |
| <i>DOLK</i>       | 6      | 1.71E+04 | 0.060  | ASPARAGINE N LINKED GLYCOSYLATION |
| <i>ALG6</i>       | 1      | 1.24E+04 | 0.068  | ASPARAGINE N LINKED GLYCOSYLATION |
| <i>COG4</i>       | 5      | 1.41E+04 | 0.072  | ASPARAGINE N LINKED GLYCOSYLATION |
| <i>NEU2</i>       | 3      | 9.10E+03 | 0.076  | ASPARAGINE N LINKED GLYCOSYLATION |
| <i>RPS27A</i>     | 1      | 2.69E+03 | 0.087  | ASPARAGINE N LINKED GLYCOSYLATION |
| <i>EDEM2</i>      | 4      | 9.43E+03 | 0.091  | ASPARAGINE N LINKED GLYCOSYLATION |
| <i>ARFGAP2</i>    | 3      | 1.43E+04 | 0.092  | ASPARAGINE N LINKED GLYCOSYLATION |
| <i>STX5</i>       | 6      | 1.12E+04 | 0.094  | ASPARAGINE N LINKED GLYCOSYLATION |
| <i>COPB2</i>      | 2      | 1.95E+03 | 0.096  | ASPARAGINE N LINKED GLYCOSYLATION |
| <i>PPP6R3</i>     | 5      | 2.60E+04 | 0.096  | ASPARAGINE N LINKED GLYCOSYLATION |
| <i>SPTBN2</i>     | 17     | 3.45E+04 | 0.097  | ASPARAGINE N LINKED GLYCOSYLATION |
| <i>ST6GAL2</i>    | 10     | 3.49E+04 | 0.099  | ASPARAGINE N LINKED GLYCOSYLATION |
| <i>RPN1</i>       | 8      | 7.20E+03 | 0.100  | ASPARAGINE N LINKED GLYCOSYLATION |
| <i>TRAPPC6A</i>   | 4      | 5.10E+03 | 0.102  | ASPARAGINE N LINKED GLYCOSYLATION |
| <i>GBF1</i>       | 5      | 5.83E+03 | 0.116  | ASPARAGINE N LINKED GLYCOSYLATION |
| <i>STX17</i>      | 2      | 6.90E+03 | 0.126  | ASPARAGINE N LINKED GLYCOSYLATION |
| <i>TMED9</i>      | 2      | 2.02E+03 | 0.132  | ASPARAGINE N LINKED GLYCOSYLATION |
| <i>ST3GAL1</i>    | 4      | 1.96E+04 | 0.142  | ASPARAGINE N LINKED GLYCOSYLATION |
| <i>ST6GALNAC1</i> | 2      | 8.30E+03 | 0.147  | ASPARAGINE N LINKED GLYCOSYLATION |
| <i>SYVN1</i>      | 3      | 1.88E+03 | 0.148  | ASPARAGINE N LINKED GLYCOSYLATION |
| <i>TUBA8</i>      | 4      | 1.16E+04 | 0.157  | ASPARAGINE N LINKED GLYCOSYLATION |
| <i>DCTN4</i>      | 5      | 1.08E+04 | 0.159  | ASPARAGINE N LINKED GLYCOSYLATION |
| <i>TFG</i>        | 1      | 1.70E+03 | 0.163  | ASPARAGINE N LINKED GLYCOSYLATION |
| <i>RNF185</i>     | 2      | 3.37E+03 | 0.164  | ASPARAGINE N LINKED GLYCOSYLATION |
| <i>ANKRD28</i>    | 11     | 1.70E+04 | 0.167  | ASPARAGINE N LINKED GLYCOSYLATION |
| <i>MGAT4B</i>     | 6      | 2.03E+04 | 0.171  | ASPARAGINE N LINKED GLYCOSYLATION |
| <i>TRAPPC4</i>    | 1      | 8.59E+02 | 0.171  | ASPARAGINE N LINKED GLYCOSYLATION |
| <i>COPA</i>       | 5      | 2.91E+03 | 0.178  | ASPARAGINE N LINKED GLYCOSYLATION |

|            |    |          |       |                                   |
|------------|----|----------|-------|-----------------------------------|
| COG7       | 6  | 6.85E+03 | 0.179 | ASPARAGINE N LINKED GLYCOSYLATION |
| SPTAN1     | 7  | 9.73E+03 | 0.184 | ASPARAGINE N LINKED GLYCOSYLATION |
| ALG12      | 2  | 4.93E+03 | 0.190 | ASPARAGINE N LINKED GLYCOSYLATION |
| B4GALT5    | 1  | 6.10E+03 | 0.198 | ASPARAGINE N LINKED GLYCOSYLATION |
| TRAPPC6B   | 1  | 7.57E+02 | 0.203 | ASPARAGINE N LINKED GLYCOSYLATION |
| ALG14      | 4  | 9.85E+03 | 0.206 | ASPARAGINE N LINKED GLYCOSYLATION |
| DCTN6      | 1  | 9.42E+02 | 0.212 | ASPARAGINE N LINKED GLYCOSYLATION |
| GOLGB1     | 31 | 3.79E+04 | 0.219 | ASPARAGINE N LINKED GLYCOSYLATION |
| MGAT3      | 6  | 6.56E+03 | 0.227 | ASPARAGINE N LINKED GLYCOSYLATION |
| DCTN5      | 1  | 2.97E+02 | 0.228 | ASPARAGINE N LINKED GLYCOSYLATION |
| DYNC1I2    | 4  | 9.48E+02 | 0.261 | ASPARAGINE N LINKED GLYCOSYLATION |
| F5         | 40 | 4.85E+04 | 0.263 | ASPARAGINE N LINKED GLYCOSYLATION |
| ST8SIA5    | 2  | 1.29E+03 | 0.267 | ASPARAGINE N LINKED GLYCOSYLATION |
| TUBA1C     | 2  | 6.49E+03 | 0.276 | ASPARAGINE N LINKED GLYCOSYLATION |
| GORASP1    | 8  | 2.49E+04 | 0.282 | ASPARAGINE N LINKED GLYCOSYLATION |
| DHDDS      | 2  | 1.39E+03 | 0.287 | ASPARAGINE N LINKED GLYCOSYLATION |
| TMEM115    | 2  | 7.51E+02 | 0.292 | ASPARAGINE N LINKED GLYCOSYLATION |
| SEC22B     | 1  | 1.94E+02 | 0.292 | ASPARAGINE N LINKED GLYCOSYLATION |
| TUBB2B     | 2  | 1.47E+03 | 0.301 | ASPARAGINE N LINKED GLYCOSYLATION |
| SEC24D     | 9  | 1.62E+04 | 0.302 | ASPARAGINE N LINKED GLYCOSYLATION |
| DYNC1I1    | 2  | 1.00E+03 | 0.308 | ASPARAGINE N LINKED GLYCOSYLATION |
| SEC23IP    | 9  | 1.31E+04 | 0.310 | ASPARAGINE N LINKED GLYCOSYLATION |
| PGM3       | 4  | 1.48E+03 | 0.315 | ASPARAGINE N LINKED GLYCOSYLATION |
| SLC35C1    | 1  | 2.24E+03 | 0.318 | ASPARAGINE N LINKED GLYCOSYLATION |
| SEC16A     | 27 | 3.63E+04 | 0.330 | ASPARAGINE N LINKED GLYCOSYLATION |
| CTSZ       | 3  | 3.74E+03 | 0.331 | ASPARAGINE N LINKED GLYCOSYLATION |
| SEC24A     | 7  | 5.44E+03 | 0.334 | ASPARAGINE N LINKED GLYCOSYLATION |
| ST8SIA6    | 3  | 2.83E+03 | 0.339 | ASPARAGINE N LINKED GLYCOSYLATION |
| ST3GAL4    | 6  | 6.28E+03 | 0.341 | ASPARAGINE N LINKED GLYCOSYLATION |
| SEC24B     | 6  | 2.88E+03 | 0.343 | ASPARAGINE N LINKED GLYCOSYLATION |
| SPTBN4     | 18 | 2.07E+04 | 0.348 | ASPARAGINE N LINKED GLYCOSYLATION |
| TMED2      | 1  | 2.34E+02 | 0.351 | ASPARAGINE N LINKED GLYCOSYLATION |
| PDIA3      | 4  | 2.46E+03 | 0.362 | ASPARAGINE N LINKED GLYCOSYLATION |
| FPGT       | 5  | 4.58E+03 | 0.365 | ASPARAGINE N LINKED GLYCOSYLATION |
| TSTA3      | 5  | 1.74E+03 | 0.365 | ASPARAGINE N LINKED GLYCOSYLATION |
| UBXN1      | 2  | 4.55E+03 | 0.387 | ASPARAGINE N LINKED GLYCOSYLATION |
| RFT1       | 7  | 4.00E+03 | 0.395 | ASPARAGINE N LINKED GLYCOSYLATION |
| ST6GALNAC4 | 1  | 5.47E+02 | 0.399 | ASPARAGINE N LINKED GLYCOSYLATION |
| GANAB      | 5  | 6.35E+03 | 0.403 | ASPARAGINE N LINKED GLYCOSYLATION |
| B4GALT4    | 3  | 3.04E+03 | 0.405 | ASPARAGINE N LINKED GLYCOSYLATION |
| NSF        | 1  | 2.81E+02 | 0.406 | ASPARAGINE N LINKED GLYCOSYLATION |
| CAPZB      | 2  | 3.66E+03 | 0.406 | ASPARAGINE N LINKED GLYCOSYLATION |
| SLC35A1    | 2  | 1.90E+03 | 0.407 | ASPARAGINE N LINKED GLYCOSYLATION |
| COPG2      | 3  | 6.16E+03 | 0.414 | ASPARAGINE N LINKED GLYCOSYLATION |
| KDEL3      | 2  | 1.72E+03 | 0.416 | ASPARAGINE N LINKED GLYCOSYLATION |
| TUBA3C     | 4  | 1.05E+04 | 0.420 | ASPARAGINE N LINKED GLYCOSYLATION |
| DPM1       | 2  | 7.93E+02 | 0.426 | ASPARAGINE N LINKED GLYCOSYLATION |
| B4GALT2    | 4  | 2.53E+03 | 0.433 | ASPARAGINE N LINKED GLYCOSYLATION |
| CANX       | 4  | 3.11E+03 | 0.436 | ASPARAGINE N LINKED GLYCOSYLATION |
| CHST10     | 3  | 1.44E+03 | 0.437 | ASPARAGINE N LINKED GLYCOSYLATION |
| MANEA      | 5  | 2.17E+03 | 0.445 | ASPARAGINE N LINKED GLYCOSYLATION |
| DOLPP1     | 1  | 1.69E+02 | 0.446 | ASPARAGINE N LINKED GLYCOSYLATION |
| ANK3       | 34 | 3.47E+04 | 0.447 | ASPARAGINE N LINKED GLYCOSYLATION |
| ST6GALNAC2 | 4  | 2.46E+03 | 0.449 | ASPARAGINE N LINKED GLYCOSYLATION |
| NUDT14     | 6  | 4.09E+03 | 0.456 | ASPARAGINE N LINKED GLYCOSYLATION |
| GRIA1      | 2  | 1.90E+03 | 0.459 | ASPARAGINE N LINKED GLYCOSYLATION |
| MAN2A2     | 9  | 8.13E+03 | 0.459 | ASPARAGINE N LINKED GLYCOSYLATION |
| ARCN1      | 1  | 5.55E+01 | 0.466 | ASPARAGINE N LINKED GLYCOSYLATION |
| TUBB4A     | 1  | 4.61E+02 | 0.476 | ASPARAGINE N LINKED GLYCOSYLATION |
| UGGT1      | 7  | 3.83E+03 | 0.479 | ASPARAGINE N LINKED GLYCOSYLATION |
| RAD23B     | 1  | 2.06E+02 | 0.481 | ASPARAGINE N LINKED GLYCOSYLATION |
| ALG10      | 3  | 1.24E+03 | 0.483 | ASPARAGINE N LINKED GLYCOSYLATION |
| NAPG       | 3  | 1.57E+03 | 0.491 | ASPARAGINE N LINKED GLYCOSYLATION |
| MOGS       | 10 | 1.44E+04 | 0.494 | ASPARAGINE N LINKED GLYCOSYLATION |
| SCFD1      | 4  | 4.76E+03 | 0.504 | ASPARAGINE N LINKED GLYCOSYLATION |
| MPDU1      | 2  | 6.44E+02 | 0.506 | ASPARAGINE N LINKED GLYCOSYLATION |
| CAPZA2     | 2  | 4.45E+02 | 0.506 | ASPARAGINE N LINKED GLYCOSYLATION |
| MIA3       | 19 | 1.60E+04 | 0.512 | ASPARAGINE N LINKED GLYCOSYLATION |
| MAN2A1     | 6  | 1.54E+03 | 0.513 | ASPARAGINE N LINKED GLYCOSYLATION |
| GNE        | 3  | 8.75E+02 | 0.516 | ASPARAGINE N LINKED GLYCOSYLATION |
| MGAT4A     | 5  | 3.88E+03 | 0.520 | ASPARAGINE N LINKED GLYCOSYLATION |
| RAB1A      | 1  | 1.38E+03 | 0.521 | ASPARAGINE N LINKED GLYCOSYLATION |
| LMAN1L     | 6  | 2.86E+03 | 0.524 | ASPARAGINE N LINKED GLYCOSYLATION |
| TRAPPC10   | 7  | 3.67E+03 | 0.527 | ASPARAGINE N LINKED GLYCOSYLATION |

|                   |    |          |       |                                   |
|-------------------|----|----------|-------|-----------------------------------|
| <i>SPTBN1</i>     | 13 | 8.86E+03 | 0.555 | ASPARAGINE N LINKED GLYCOSYLATION |
| <i>AREG</i>       | 1  | 1.33E+03 | 0.563 | ASPARAGINE N LINKED GLYCOSYLATION |
| <i>PMM2</i>       | 7  | 4.86E+03 | 0.567 | ASPARAGINE N LINKED GLYCOSYLATION |
| <i>ST6GALNAC5</i> | 2  | 1.51E+03 | 0.569 | ASPARAGINE N LINKED GLYCOSYLATION |
| <i>ALG2</i>       | 4  | 2.48E+03 | 0.571 | ASPARAGINE N LINKED GLYCOSYLATION |
| <i>ARFGAP3</i>    | 8  | 1.41E+04 | 0.571 | ASPARAGINE N LINKED GLYCOSYLATION |
| <i>TBC1D20</i>    | 2  | 1.78E+03 | 0.573 | ASPARAGINE N LINKED GLYCOSYLATION |
| <i>PRKCSH</i>     | 12 | 7.49E+03 | 0.576 | ASPARAGINE N LINKED GLYCOSYLATION |
| <i>MAN1A1</i>     | 3  | 2.12E+03 | 0.590 | ASPARAGINE N LINKED GLYCOSYLATION |
| <i>B4GALNT2</i>   | 5  | 6.61E+03 | 0.595 | ASPARAGINE N LINKED GLYCOSYLATION |
| <i>TRAPPC1</i>    | 1  | 1.99E+01 | 0.595 | ASPARAGINE N LINKED GLYCOSYLATION |
| <i>USO1</i>       | 7  | 1.69E+03 | 0.595 | ASPARAGINE N LINKED GLYCOSYLATION |
| <i>B4GALT6</i>    | 1  | 7.97E+01 | 0.597 | ASPARAGINE N LINKED GLYCOSYLATION |
| <i>AMFR</i>       | 2  | 4.94E+02 | 0.603 | ASPARAGINE N LINKED GLYCOSYLATION |
| <i>SEL1L</i>      | 9  | 8.63E+03 | 0.603 | ASPARAGINE N LINKED GLYCOSYLATION |
| <i>ANK2</i>       | 31 | 1.51E+04 | 0.612 | ASPARAGINE N LINKED GLYCOSYLATION |
| <i>COG2</i>       | 6  | 3.53E+03 | 0.615 | ASPARAGINE N LINKED GLYCOSYLATION |
| <i>COPZ2</i>      | 2  | 7.01E+02 | 0.623 | ASPARAGINE N LINKED GLYCOSYLATION |
| <i>GOSR2</i>      | 3  | 2.58E+03 | 0.625 | ASPARAGINE N LINKED GLYCOSYLATION |
| <i>LMAN2</i>      | 3  | 1.56E+03 | 0.627 | ASPARAGINE N LINKED GLYCOSYLATION |
| <i>FUT8</i>       | 4  | 2.19E+03 | 0.627 | ASPARAGINE N LINKED GLYCOSYLATION |
| <i>ALG1</i>       | 9  | 3.80E+03 | 0.628 | ASPARAGINE N LINKED GLYCOSYLATION |
| <i>CHST8</i>      | 6  | 2.75E+03 | 0.628 | ASPARAGINE N LINKED GLYCOSYLATION |
| <i>OS9</i>        | 7  | 7.48E+02 | 0.629 | ASPARAGINE N LINKED GLYCOSYLATION |
| <i>CALR</i>       | 5  | 1.10E+03 | 0.637 | ASPARAGINE N LINKED GLYCOSYLATION |
| <i>TUBA3D</i>     | 1  | 6.84E+01 | 0.638 | ASPARAGINE N LINKED GLYCOSYLATION |
| <i>CTSC</i>       | 5  | 8.46E+02 | 0.639 | ASPARAGINE N LINKED GLYCOSYLATION |
| <i>COPE</i>       | 5  | 1.64E+03 | 0.639 | ASPARAGINE N LINKED GLYCOSYLATION |
| <i>SEC23A</i>     | 3  | 5.92E+02 | 0.640 | ASPARAGINE N LINKED GLYCOSYLATION |
| <i>DAD1</i>       | 1  | 1.27E+02 | 0.641 | ASPARAGINE N LINKED GLYCOSYLATION |
| <i>GOLGA2</i>     | 13 | 5.05E+03 | 0.643 | ASPARAGINE N LINKED GLYCOSYLATION |
| <i>EDEM3</i>      | 6  | 1.02E+04 | 0.645 | ASPARAGINE N LINKED GLYCOSYLATION |
| <i>GMPPA</i>      | 7  | 2.55E+03 | 0.652 | ASPARAGINE N LINKED GLYCOSYLATION |
| <i>TUBB6</i>      | 5  | 2.34E+03 | 0.653 | ASPARAGINE N LINKED GLYCOSYLATION |
| <i>B4GALT3</i>    | 3  | 1.10E+03 | 0.655 | ASPARAGINE N LINKED GLYCOSYLATION |
| <i>SEC24C</i>     | 11 | 7.28E+03 | 0.658 | ASPARAGINE N LINKED GLYCOSYLATION |
| <i>NEU4</i>       | 11 | 7.75E+03 | 0.668 | ASPARAGINE N LINKED GLYCOSYLATION |
| <i>CAPZA3</i>     | 9  | 9.04E+03 | 0.673 | ASPARAGINE N LINKED GLYCOSYLATION |
| <i>ST8SIA2</i>    | 1  | 3.24E+01 | 0.676 | ASPARAGINE N LINKED GLYCOSYLATION |
| <i>DCTN2</i>      | 3  | 2.90E+02 | 0.676 | ASPARAGINE N LINKED GLYCOSYLATION |
| <i>NAPA</i>       | 2  | 4.76E+02 | 0.681 | ASPARAGINE N LINKED GLYCOSYLATION |
| <i>MLEC</i>       | 1  | 3.56E+01 | 0.683 | ASPARAGINE N LINKED GLYCOSYLATION |
| <i>ALG5</i>       | 1  | 1.19E+02 | 0.688 | ASPARAGINE N LINKED GLYCOSYLATION |
| <i>TRAPPC9</i>    | 11 | 4.40E+03 | 0.691 | ASPARAGINE N LINKED GLYCOSYLATION |
| <i>ST3GAL5</i>    | 3  | 1.80E+03 | 0.694 | ASPARAGINE N LINKED GLYCOSYLATION |
| <i>NGLY1</i>      | 5  | 6.36E+02 | 0.697 | ASPARAGINE N LINKED GLYCOSYLATION |
| <i>SEC31A</i>     | 6  | 2.22E+03 | 0.697 | ASPARAGINE N LINKED GLYCOSYLATION |
| <i>CAPZA1</i>     | 4  | 2.33E+03 | 0.706 | ASPARAGINE N LINKED GLYCOSYLATION |
| <i>TRIM13</i>     | 1  | 4.83E+02 | 0.716 | ASPARAGINE N LINKED GLYCOSYLATION |
| <i>CTSA</i>       | 3  | 6.21E+02 | 0.717 | ASPARAGINE N LINKED GLYCOSYLATION |
| <i>MGAT4C</i>     | 3  | 1.21E+03 | 0.721 | ASPARAGINE N LINKED GLYCOSYLATION |
| <i>RNF103</i>     | 9  | 4.69E+03 | 0.722 | ASPARAGINE N LINKED GLYCOSYLATION |
| <i>NEU3</i>       | 6  | 2.67E+03 | 0.726 | ASPARAGINE N LINKED GLYCOSYLATION |
| <i>UGGT2</i>      | 18 | 6.41E+03 | 0.731 | ASPARAGINE N LINKED GLYCOSYLATION |
| <i>ALG9</i>       | 6  | 1.10E+03 | 0.734 | ASPARAGINE N LINKED GLYCOSYLATION |
| <i>ALG3</i>       | 4  | 1.36E+03 | 0.734 | ASPARAGINE N LINKED GLYCOSYLATION |
| <i>GMPPB</i>      | 2  | 1.41E+03 | 0.737 | ASPARAGINE N LINKED GLYCOSYLATION |
| <i>SERPINA1</i>   | 11 | 4.48E+03 | 0.737 | ASPARAGINE N LINKED GLYCOSYLATION |
| <i>MPI</i>        | 4  | 1.30E+03 | 0.738 | ASPARAGINE N LINKED GLYCOSYLATION |
| <i>COG1</i>       | 11 | 9.35E+03 | 0.745 | ASPARAGINE N LINKED GLYCOSYLATION |
| <i>UMOD</i>       | 8  | 2.08E+03 | 0.749 | ASPARAGINE N LINKED GLYCOSYLATION |
| <i>YKT6</i>       | 3  | 3.95E+02 | 0.751 | ASPARAGINE N LINKED GLYCOSYLATION |
| <i>NUS1</i>       | 2  | 2.10E+02 | 0.754 | ASPARAGINE N LINKED GLYCOSYLATION |
| <i>NAGK</i>       | 4  | 3.71E+02 | 0.757 | ASPARAGINE N LINKED GLYCOSYLATION |
| <i>DCTN1</i>      | 14 | 4.29E+03 | 0.758 | ASPARAGINE N LINKED GLYCOSYLATION |
| <i>DYNC1H1</i>    | 7  | 1.68E+03 | 0.763 | ASPARAGINE N LINKED GLYCOSYLATION |
| <i>TUBA4A</i>     | 1  | 2.05E+01 | 0.764 | ASPARAGINE N LINKED GLYCOSYLATION |
| <i>LMAN2L</i>     | 1  | 1.50E+01 | 0.764 | ASPARAGINE N LINKED GLYCOSYLATION |
| <i>SPTB</i>       | 27 | 4.35E+03 | 0.768 | ASPARAGINE N LINKED GLYCOSYLATION |
| <i>PREB</i>       | 1  | 3.27E+01 | 0.770 | ASPARAGINE N LINKED GLYCOSYLATION |
| <i>DERL1</i>      | 1  | 3.33E+01 | 0.772 | ASPARAGINE N LINKED GLYCOSYLATION |
| <i>GFPT2</i>      | 5  | 4.66E+02 | 0.774 | ASPARAGINE N LINKED GLYCOSYLATION |
| <i>LMAN1</i>      | 2  | 3.58E+02 | 0.777 | ASPARAGINE N LINKED GLYCOSYLATION |
| <i>LHB</i>        | 3  | 1.75E+03 | 0.780 | ASPARAGINE N LINKED GLYCOSYLATION |

|            |    |          |       |                                   |
|------------|----|----------|-------|-----------------------------------|
| MGAT5      | 5  | 4.79E+02 | 0.785 | ASPARAGINE N LINKED GLYCOSYLATION |
| GOSR1      | 1  | 2.71E+01 | 0.789 | ASPARAGINE N LINKED GLYCOSYLATION |
| NANS       | 6  | 2.21E+03 | 0.791 | ASPARAGINE N LINKED GLYCOSYLATION |
| ST8SIA1    | 3  | 5.17E+02 | 0.794 | ASPARAGINE N LINKED GLYCOSYLATION |
| COG6       | 2  | 2.38E+02 | 0.802 | ASPARAGINE N LINKED GLYCOSYLATION |
| TUBA3E     | 6  | 1.15E+03 | 0.814 | ASPARAGINE N LINKED GLYCOSYLATION |
| SEC22C     | 4  | 7.97E+02 | 0.816 | ASPARAGINE N LINKED GLYCOSYLATION |
| DDOST      | 5  | 1.20E+03 | 0.818 | ASPARAGINE N LINKED GLYCOSYLATION |
| COG3       | 5  | 1.20E+03 | 0.822 | ASPARAGINE N LINKED GLYCOSYLATION |
| TUSC3      | 3  | 9.12E+02 | 0.823 | ASPARAGINE N LINKED GLYCOSYLATION |
| COL7A1     | 24 | 1.24E+04 | 0.824 | ASPARAGINE N LINKED GLYCOSYLATION |
| TUBAL3     | 7  | 6.78E+02 | 0.831 | ASPARAGINE N LINKED GLYCOSYLATION |
| MGAT2      | 3  | 3.43E+02 | 0.838 | ASPARAGINE N LINKED GLYCOSYLATION |
| MAN1A2     | 2  | 3.68E+02 | 0.841 | ASPARAGINE N LINKED GLYCOSYLATION |
| TRAPPC2L   | 4  | 3.36E+03 | 0.843 | ASPARAGINE N LINKED GLYCOSYLATION |
| ST6GALNAC3 | 4  | 1.22E+03 | 0.846 | ASPARAGINE N LINKED GLYCOSYLATION |
| TMED3      | 3  | 2.98E+02 | 0.858 | ASPARAGINE N LINKED GLYCOSYLATION |
| SEC16B     | 14 | 3.71E+03 | 0.860 | ASPARAGINE N LINKED GLYCOSYLATION |
| PSMC1      | 1  | 4.42E+00 | 0.860 | ASPARAGINE N LINKED GLYCOSYLATION |
| NAPB       | 1  | 2.77E+01 | 0.861 | ASPARAGINE N LINKED GLYCOSYLATION |
| FUT3       | 16 | 2.16E+03 | 0.867 | ASPARAGINE N LINKED GLYCOSYLATION |
| SPTA1      | 44 | 1.36E+04 | 0.869 | ASPARAGINE N LINKED GLYCOSYLATION |
| MVD        | 10 | 5.04E+02 | 0.876 | ASPARAGINE N LINKED GLYCOSYLATION |
| AMDHD2     | 10 | 1.37E+03 | 0.877 | ASPARAGINE N LINKED GLYCOSYLATION |
| SEC13      | 1  | 5.26E+00 | 0.889 | ASPARAGINE N LINKED GLYCOSYLATION |
| ALG10B     | 10 | 6.55E+03 | 0.889 | ASPARAGINE N LINKED GLYCOSYLATION |
| COG8       | 4  | 5.00E+02 | 0.891 | ASPARAGINE N LINKED GLYCOSYLATION |
| FUCA1      | 4  | 5.41E+02 | 0.896 | ASPARAGINE N LINKED GLYCOSYLATION |
| FOLR1      | 1  | 1.99E+01 | 0.899 | ASPARAGINE N LINKED GLYCOSYLATION |
| CD55       | 5  | 1.70E+02 | 0.906 | ASPARAGINE N LINKED GLYCOSYLATION |
| CNIH3      | 1  | 3.48E+00 | 0.907 | ASPARAGINE N LINKED GLYCOSYLATION |
| ANK1       | 20 | 1.01E+04 | 0.917 | ASPARAGINE N LINKED GLYCOSYLATION |
| DCTN3      | 1  | 1.52E+00 | 0.925 | ASPARAGINE N LINKED GLYCOSYLATION |
| SPTBN5     | 57 | 3.18E+04 | 0.928 | ASPARAGINE N LINKED GLYCOSYLATION |
| TRAPPC5    | 1  | 1.18E+00 | 0.935 | ASPARAGINE N LINKED GLYCOSYLATION |
| SEC22A     | 1  | 2.38E-01 | 0.967 | ASPARAGINE N LINKED GLYCOSYLATION |
| MCFD2      | 2  | 2.75E+02 | 1     | ASPARAGINE N LINKED GLYCOSYLATION |
| ST3GAL3    | 4  | 5.29E+02 | 1     | ASPARAGINE N LINKED GLYCOSYLATION |
| UAP1       | 7  | 1.03E+03 | 1     | ASPARAGINE N LINKED GLYCOSYLATION |
| PMM1       | 5  | 1.29E+03 | 1     | ASPARAGINE N LINKED GLYCOSYLATION |
| FUOM       | 4  | 6.20E+00 | 1     | ASPARAGINE N LINKED GLYCOSYLATION |
| NANP       | 2  | 1.18E+02 | 1     | ASPARAGINE N LINKED GLYCOSYLATION |
| RPN2       | 6  | 5.08E+01 | 1     | ASPARAGINE N LINKED GLYCOSYLATION |
| GLB1       | 7  | 7.02E+02 | 1     | ASPARAGINE N LINKED GLYCOSYLATION |
| ALG11      | 10 | 3.49E+01 | 1     | ASPARAGINE N LINKED GLYCOSYLATION |
| ST3GAL6    | 3  | 1.19E+01 | 1     | ASPARAGINE N LINKED GLYCOSYLATION |
| ALG8       | 5  | 1.32E+03 | 1     | ASPARAGINE N LINKED GLYCOSYLATION |
| GFPT1      | 2  | 1.41E+01 | 1     | ASPARAGINE N LINKED GLYCOSYLATION |
| DPAGT1     | 2  | 1.12E+02 | 1     | ASPARAGINE N LINKED GLYCOSYLATION |
| COPB1      | 6  | 1.14E+02 | 1     | ASPARAGINE N LINKED GLYCOSYLATION |
| MAN1C1     | 3  | 2.76E+02 | 1     | ASPARAGINE N LINKED GLYCOSYLATION |
| PPP6R1     | 11 | 6.29E+03 | 1     | ASPARAGINE N LINKED GLYCOSYLATION |
| TUBA4B     | 5  | 2.49E+02 | 1     | ASPARAGINE N LINKED GLYCOSYLATION |

| Gene    | NumVar | Q        | Pvalue   | Gene-set            |
|---------|--------|----------|----------|---------------------|
| DRD2    | 13     | 5.66E+06 | 2.15E-10 | GPCR LIGAND BINDING |
| FFAR3   | 14     | 3.28E+05 | 0.001    | GPCR LIGAND BINDING |
| RRH     | 5      | 3.58E+04 | 0.001    | GPCR LIGAND BINDING |
| QRFPR   | 8      | 1.58E+05 | 0.010    | GPCR LIGAND BINDING |
| WNT2    | 4      | 2.90E+04 | 0.012    | GPCR LIGAND BINDING |
| C5AR1   | 7      | 4.11E+04 | 0.018    | GPCR LIGAND BINDING |
| ADRA1D  | 8      | 4.79E+04 | 0.019    | GPCR LIGAND BINDING |
| APP     | 2      | 3.42E+03 | 0.021    | GPCR LIGAND BINDING |
| SSTR4   | 6      | 1.98E+04 | 0.026    | GPCR LIGAND BINDING |
| FZD7    | 1      | 1.47E+04 | 0.028    | GPCR LIGAND BINDING |
| GNG4    | 1      | 4.00E+03 | 0.028    | GPCR LIGAND BINDING |
| PROK2   | 2      | 1.68E+03 | 0.028    | GPCR LIGAND BINDING |
| TAS2R13 | 1      | 2.03E+03 | 0.031    | GPCR LIGAND BINDING |
| ADM2    | 4      | 6.37E+03 | 0.034    | GPCR LIGAND BINDING |
| MC4R    | 5      | 4.32E+04 | 0.034    | GPCR LIGAND BINDING |
| NMBR    | 7      | 3.42E+04 | 0.037    | GPCR LIGAND BINDING |
| CXCL13  | 1      | 5.44E+02 | 0.040    | GPCR LIGAND BINDING |
| MLNR    | 1      | 1.22E+04 | 0.042    | GPCR LIGAND BINDING |
| F2      | 5      | 7.45E+03 | 0.047    | GPCR LIGAND BINDING |

|         |    |          |       |                     |
|---------|----|----------|-------|---------------------|
| CCL25   | 2  | 1.51E+04 | 0.055 | GPCR LIGAND BINDING |
| TAS2R39 | 4  | 1.10E+04 | 0.058 | GPCR LIGAND BINDING |
| INSL5   | 3  | 7.77E+03 | 0.060 | GPCR LIGAND BINDING |
| GNG10   | 1  | 4.84E+03 | 0.060 | GPCR LIGAND BINDING |
| RLN2    | 6  | 1.71E+04 | 0.062 | GPCR LIGAND BINDING |
| APLNR   | 4  | 6.90E+03 | 0.065 | GPCR LIGAND BINDING |
| GNAS    | 16 | 3.79E+04 | 0.066 | GPCR LIGAND BINDING |
| GPHB5   | 3  | 1.53E+04 | 0.067 | GPCR LIGAND BINDING |
| P2RY6   | 4  | 5.25E+03 | 0.068 | GPCR LIGAND BINDING |
| CRHBP   | 3  | 5.16E+03 | 0.071 | GPCR LIGAND BINDING |
| LPAR5   | 1  | 4.80E+02 | 0.082 | GPCR LIGAND BINDING |
| NPBWR1  | 3  | 5.56E+03 | 0.083 | GPCR LIGAND BINDING |
| KNG1    | 2  | 3.00E+03 | 0.084 | GPCR LIGAND BINDING |
| TAAR9   | 5  | 8.59E+03 | 0.085 | GPCR LIGAND BINDING |
| GHRHR   | 2  | 1.23E+04 | 0.088 | GPCR LIGAND BINDING |
| CX3CL1  | 5  | 1.21E+04 | 0.088 | GPCR LIGAND BINDING |
| CCR2    | 3  | 1.69E+03 | 0.088 | GPCR LIGAND BINDING |
| CCL27   | 2  | 2.45E+03 | 0.090 | GPCR LIGAND BINDING |
| GRP     | 2  | 8.99E+02 | 0.092 | GPCR LIGAND BINDING |
| PSAP    | 3  | 3.19E+03 | 0.097 | GPCR LIGAND BINDING |
| ADRB1   | 1  | 1.27E+03 | 0.110 | GPCR LIGAND BINDING |
| PTH1R   | 4  | 2.07E+04 | 0.116 | GPCR LIGAND BINDING |
| GIPR    | 9  | 1.08E+04 | 0.116 | GPCR LIGAND BINDING |
| TAS1R1  | 19 | 5.90E+04 | 0.117 | GPCR LIGAND BINDING |
| PLPPR4  | 5  | 1.65E+04 | 0.117 | GPCR LIGAND BINDING |
| SMO     | 11 | 2.18E+04 | 0.118 | GPCR LIGAND BINDING |
| WNT7B   | 1  | 6.05E+02 | 0.118 | GPCR LIGAND BINDING |
| F2RL1   | 4  | 1.12E+04 | 0.121 | GPCR LIGAND BINDING |
| WNT9A   | 3  | 3.40E+03 | 0.125 | GPCR LIGAND BINDING |
| HTR5A   | 1  | 9.91E+02 | 0.126 | GPCR LIGAND BINDING |
| CNR1    | 1  | 5.34E+02 | 0.126 | GPCR LIGAND BINDING |
| TBXA2R  | 12 | 2.12E+04 | 0.133 | GPCR LIGAND BINDING |
| CXCR4   | 3  | 5.43E+03 | 0.136 | GPCR LIGAND BINDING |
| WNT10B  | 4  | 1.61E+04 | 0.136 | GPCR LIGAND BINDING |
| NPB     | 4  | 5.38E+03 | 0.141 | GPCR LIGAND BINDING |
| ADRB2   | 2  | 8.42E+03 | 0.146 | GPCR LIGAND BINDING |
| HTR1A   | 3  | 1.64E+04 | 0.147 | GPCR LIGAND BINDING |
| CHRM2   | 3  | 8.45E+03 | 0.148 | GPCR LIGAND BINDING |
| TAS2R50 | 1  | 4.83E+02 | 0.149 | GPCR LIGAND BINDING |
| PTGFR   | 6  | 1.78E+04 | 0.150 | GPCR LIGAND BINDING |
| GCG     | 3  | 3.55E+03 | 0.151 | GPCR LIGAND BINDING |
| S1PR2   | 4  | 1.54E+04 | 0.156 | GPCR LIGAND BINDING |
| CCR3    | 7  | 2.09E+04 | 0.161 | GPCR LIGAND BINDING |
| PTGDR   | 6  | 1.47E+04 | 0.161 | GPCR LIGAND BINDING |
| HTR2B   | 1  | 2.85E+02 | 0.171 | GPCR LIGAND BINDING |
| OPN4    | 8  | 2.53E+04 | 0.177 | GPCR LIGAND BINDING |
| ANXA1   | 2  | 2.11E+03 | 0.179 | GPCR LIGAND BINDING |
| GCGR    | 6  | 1.09E+04 | 0.184 | GPCR LIGAND BINDING |
| CXCR1   | 8  | 1.15E+04 | 0.187 | GPCR LIGAND BINDING |
| ACKR3   | 4  | 9.26E+03 | 0.188 | GPCR LIGAND BINDING |
| HTR1B   | 1  | 6.22E+03 | 0.191 | GPCR LIGAND BINDING |
| CXCL3   | 2  | 6.60E+03 | 0.191 | GPCR LIGAND BINDING |
| GRM7    | 1  | 4.46E+02 | 0.193 | GPCR LIGAND BINDING |
| CORT    | 1  | 3.50E+02 | 0.202 | GPCR LIGAND BINDING |
| FZD4    | 5  | 2.95E+04 | 0.203 | GPCR LIGAND BINDING |
| CYSLTR2 | 7  | 5.38E+04 | 0.204 | GPCR LIGAND BINDING |
| GPR37   | 7  | 1.15E+04 | 0.206 | GPCR LIGAND BINDING |
| FFAR4   | 2  | 6.99E+03 | 0.210 | GPCR LIGAND BINDING |
| CCL5    | 1  | 3.12E+02 | 0.211 | GPCR LIGAND BINDING |
| CRHR2   | 11 | 2.24E+04 | 0.214 | GPCR LIGAND BINDING |
| AVPR1B  | 9  | 1.01E+04 | 0.228 | GPCR LIGAND BINDING |
| ADRA2A  | 4  | 3.12E+03 | 0.228 | GPCR LIGAND BINDING |
| POMC    | 7  | 1.57E+04 | 0.229 | GPCR LIGAND BINDING |
| GPR17   | 11 | 9.27E+03 | 0.232 | GPCR LIGAND BINDING |
| GRM6    | 17 | 3.20E+04 | 0.234 | GPCR LIGAND BINDING |
| CALCB   | 1  | 3.69E+02 | 0.237 | GPCR LIGAND BINDING |
| NMUR2   | 7  | 1.75E+04 | 0.244 | GPCR LIGAND BINDING |
| GALR1   | 4  | 2.03E+03 | 0.250 | GPCR LIGAND BINDING |
| CXCL2   | 3  | 1.19E+04 | 0.258 | GPCR LIGAND BINDING |
| GNRH1   | 1  | 1.34E+03 | 0.266 | GPCR LIGAND BINDING |
| PTGER1  | 6  | 6.37E+03 | 0.267 | GPCR LIGAND BINDING |
| NLN     | 7  | 5.29E+03 | 0.275 | GPCR LIGAND BINDING |
| KEL     | 8  | 9.16E+03 | 0.278 | GPCR LIGAND BINDING |
| CCR9    | 4  | 8.16E+03 | 0.279 | GPCR LIGAND BINDING |

|         |    |          |       |                     |
|---------|----|----------|-------|---------------------|
| TAS2R43 | 4  | 2.08E+04 | 0.282 | GPCR LIGAND BINDING |
| CXCL9   | 1  | 5.36E+02 | 0.289 | GPCR LIGAND BINDING |
| RXFP3   | 5  | 2.24E+03 | 0.290 | GPCR LIGAND BINDING |
| TAS2R14 | 4  | 1.25E+04 | 0.293 | GPCR LIGAND BINDING |
| C5      | 12 | 1.23E+04 | 0.294 | GPCR LIGAND BINDING |
| GPFR1   | 5  | 9.33E+03 | 0.297 | GPCR LIGAND BINDING |
| CNR2    | 5  | 6.09E+03 | 0.298 | GPCR LIGAND BINDING |
| UCN3    | 1  | 2.38E+02 | 0.298 | GPCR LIGAND BINDING |
| WNT8A   | 2  | 1.07E+03 | 0.300 | GPCR LIGAND BINDING |
| FSHR    | 5  | 4.26E+03 | 0.301 | GPCR LIGAND BINDING |
| S1PR4   | 11 | 1.41E+04 | 0.301 | GPCR LIGAND BINDING |
| GPR18   | 2  | 3.08E+03 | 0.301 | GPCR LIGAND BINDING |
| VIPR2   | 7  | 5.04E+03 | 0.302 | GPCR LIGAND BINDING |
| HRH3    | 2  | 8.34E+02 | 0.304 | GPCR LIGAND BINDING |
| TRHR    | 4  | 2.37E+03 | 0.307 | GPCR LIGAND BINDING |
| CCR6    | 1  | 3.00E+03 | 0.307 | GPCR LIGAND BINDING |
| PTGIR   | 4  | 1.04E+04 | 0.308 | GPCR LIGAND BINDING |
| CXCL1   | 1  | 7.24E+02 | 0.308 | GPCR LIGAND BINDING |
| MC2R    | 5  | 5.79E+03 | 0.313 | GPCR LIGAND BINDING |
| WNT11   | 1  | 3.04E+02 | 0.315 | GPCR LIGAND BINDING |
| TACR1   | 2  | 9.74E+02 | 0.318 | GPCR LIGAND BINDING |
| IHH     | 5  | 1.99E+03 | 0.326 | GPCR LIGAND BINDING |
| LTB4R   | 4  | 1.86E+03 | 0.327 | GPCR LIGAND BINDING |
| GRM5    | 4  | 1.84E+03 | 0.328 | GPCR LIGAND BINDING |
| HEBP1   | 3  | 1.16E+03 | 0.337 | GPCR LIGAND BINDING |
| PTAFR   | 3  | 2.22E+03 | 0.341 | GPCR LIGAND BINDING |
| RAMP1   | 1  | 1.35E+02 | 0.342 | GPCR LIGAND BINDING |
| NPFFR1  | 8  | 5.71E+03 | 0.347 | GPCR LIGAND BINDING |
| CXCR5   | 4  | 5.22E+03 | 0.349 | GPCR LIGAND BINDING |
| ACKR4   | 5  | 3.86E+03 | 0.361 | GPCR LIGAND BINDING |
| TAC3    | 1  | 1.28E+02 | 0.362 | GPCR LIGAND BINDING |
| HRH2    | 3  | 1.80E+03 | 0.362 | GPCR LIGAND BINDING |
| GPRC6A  | 9  | 1.86E+04 | 0.362 | GPCR LIGAND BINDING |
| APLF    | 5  | 4.98E+03 | 0.366 | GPCR LIGAND BINDING |
| CCL23   | 2  | 3.99E+03 | 0.367 | GPCR LIGAND BINDING |
| OPN1SW  | 3  | 1.34E+03 | 0.371 | GPCR LIGAND BINDING |
| GHRH    | 1  | 2.90E+03 | 0.373 | GPCR LIGAND BINDING |
| OPRM1   | 16 | 1.52E+04 | 0.374 | GPCR LIGAND BINDING |
| DRD5    | 6  | 5.99E+03 | 0.376 | GPCR LIGAND BINDING |
| CALCR   | 6  | 4.50E+03 | 0.378 | GPCR LIGAND BINDING |
| GRM4    | 2  | 8.27E+02 | 0.380 | GPCR LIGAND BINDING |
| GNRHR   | 5  | 5.57E+03 | 0.387 | GPCR LIGAND BINDING |
| TAAR8   | 2  | 1.09E+03 | 0.390 | GPCR LIGAND BINDING |
| GPR31   | 4  | 2.12E+03 | 0.393 | GPCR LIGAND BINDING |
| FZD3    | 3  | 1.34E+03 | 0.393 | GPCR LIGAND BINDING |
| TAS2R46 | 2  | 9.42E+02 | 0.394 | GPCR LIGAND BINDING |
| PROKR2  | 7  | 5.79E+03 | 0.396 | GPCR LIGAND BINDING |
| GPR132  | 2  | 2.70E+03 | 0.398 | GPCR LIGAND BINDING |
| DRD4    | 25 | 3.81E+04 | 0.398 | GPCR LIGAND BINDING |
| SST     | 4  | 9.12E+03 | 0.401 | GPCR LIGAND BINDING |
| NTS     | 3  | 1.62E+03 | 0.404 | GPCR LIGAND BINDING |
| TAS2R30 | 23 | 4.50E+04 | 0.410 | GPCR LIGAND BINDING |
| WNT3A   | 2  | 4.57E+02 | 0.412 | GPCR LIGAND BINDING |
| NMB     | 1  | 3.51E+02 | 0.417 | GPCR LIGAND BINDING |
| RAMP3   | 2  | 5.45E+02 | 0.427 | GPCR LIGAND BINDING |
| FSHB    | 3  | 2.34E+03 | 0.432 | GPCR LIGAND BINDING |
| TACR2   | 9  | 6.30E+03 | 0.433 | GPCR LIGAND BINDING |
| ADGRE5  | 16 | 1.21E+04 | 0.437 | GPCR LIGAND BINDING |
| C3AR1   | 2  | 3.22E+03 | 0.439 | GPCR LIGAND BINDING |
| PLPPR1  | 2  | 3.09E+03 | 0.443 | GPCR LIGAND BINDING |
| TAS2R16 | 4  | 1.56E+03 | 0.445 | GPCR LIGAND BINDING |
| QRFP    | 3  | 7.08E+03 | 0.446 | GPCR LIGAND BINDING |
| PENK    | 4  | 1.99E+03 | 0.448 | GPCR LIGAND BINDING |
| CCR4    | 1  | 1.22E+02 | 0.449 | GPCR LIGAND BINDING |
| CCRL2   | 5  | 8.35E+03 | 0.456 | GPCR LIGAND BINDING |
| GABBR1  | 3  | 1.77E+03 | 0.462 | GPCR LIGAND BINDING |
| PLPPR2  | 5  | 4.02E+03 | 0.464 | GPCR LIGAND BINDING |
| TAS2R38 | 3  | 1.69E+03 | 0.465 | GPCR LIGAND BINDING |
| LHCGR   | 2  | 1.24E+03 | 0.466 | GPCR LIGAND BINDING |
| S1PR5   | 4  | 6.22E+03 | 0.470 | GPCR LIGAND BINDING |
| SSTR3   | 13 | 6.32E+03 | 0.471 | GPCR LIGAND BINDING |
| GPBAR1  | 5  | 2.77E+03 | 0.475 | GPCR LIGAND BINDING |
| MC5R    | 3  | 2.21E+03 | 0.475 | GPCR LIGAND BINDING |
| MC3R    | 2  | 9.04E+02 | 0.477 | GPCR LIGAND BINDING |

|           |    |          |       |                     |
|-----------|----|----------|-------|---------------------|
| TAS1R3    | 16 | 1.18E+04 | 0.479 | GPCR LIGAND BINDING |
| GPR39     | 7  | 5.36E+03 | 0.481 | GPCR LIGAND BINDING |
| NPY2R     | 1  | 2.28E+02 | 0.482 | GPCR LIGAND BINDING |
| PTCH1     | 17 | 9.47E+03 | 0.483 | GPCR LIGAND BINDING |
| F2R       | 2  | 6.48E+02 | 0.484 | GPCR LIGAND BINDING |
| SSTR5     | 14 | 5.90E+03 | 0.484 | GPCR LIGAND BINDING |
| RXFP4     | 8  | 4.86E+03 | 0.485 | GPCR LIGAND BINDING |
| UCN2      | 2  | 1.05E+03 | 0.488 | GPCR LIGAND BINDING |
| KISS1     | 1  | 9.08E+01 | 0.488 | GPCR LIGAND BINDING |
| PTH2      | 4  | 1.75E+03 | 0.499 | GPCR LIGAND BINDING |
| ADRA1B    | 6  | 2.10E+03 | 0.501 | GPCR LIGAND BINDING |
| GPR55     | 2  | 4.16E+02 | 0.503 | GPCR LIGAND BINDING |
| CXCR6     | 2  | 1.13E+03 | 0.505 | GPCR LIGAND BINDING |
| GALR2     | 4  | 6.54E+03 | 0.506 | GPCR LIGAND BINDING |
| CCL16     | 1  | 1.49E+03 | 0.506 | GPCR LIGAND BINDING |
| OPRK1     | 3  | 5.16E+02 | 0.507 | GPCR LIGAND BINDING |
| NPW       | 3  | 7.17E+02 | 0.508 | GPCR LIGAND BINDING |
| NPSR1     | 4  | 3.46E+03 | 0.509 | GPCR LIGAND BINDING |
| UTS2      | 2  | 3.07E+03 | 0.510 | GPCR LIGAND BINDING |
| CMKLR1    | 5  | 8.10E+03 | 0.511 | GPCR LIGAND BINDING |
| NMU       | 3  | 2.95E+03 | 0.514 | GPCR LIGAND BINDING |
| GRM3      | 4  | 3.25E+03 | 0.520 | GPCR LIGAND BINDING |
| GHRL      | 3  | 4.65E+03 | 0.524 | GPCR LIGAND BINDING |
| PLPPR3    | 10 | 7.52E+03 | 0.526 | GPCR LIGAND BINDING |
| LTB4R2    | 4  | 1.01E+03 | 0.527 | GPCR LIGAND BINDING |
| FFAR1     | 3  | 1.69E+03 | 0.530 | GPCR LIGAND BINDING |
| FPR2      | 3  | 1.80E+03 | 0.531 | GPCR LIGAND BINDING |
| F2RL2     | 4  | 8.44E+03 | 0.534 | GPCR LIGAND BINDING |
| CCL13     | 2  | 3.88E+02 | 0.535 | GPCR LIGAND BINDING |
| S1PR1     | 2  | 2.46E+03 | 0.537 | GPCR LIGAND BINDING |
| PMCH      | 1  | 9.44E+01 | 0.539 | GPCR LIGAND BINDING |
| WNT4      | 1  | 9.13E+01 | 0.540 | GPCR LIGAND BINDING |
| FFAR2     | 6  | 2.79E+03 | 0.541 | GPCR LIGAND BINDING |
| NPY5R     | 1  | 7.21E+01 | 0.542 | GPCR LIGAND BINDING |
| ADCYAP1R1 | 8  | 3.48E+03 | 0.544 | GPCR LIGAND BINDING |
| UCN       | 1  | 2.24E+02 | 0.549 | GPCR LIGAND BINDING |
| TACR3     | 4  | 3.29E+03 | 0.549 | GPCR LIGAND BINDING |
| TAS2R42   | 1  | 8.11E+01 | 0.550 | GPCR LIGAND BINDING |
| PRLH      | 2  | 7.62E+02 | 0.552 | GPCR LIGAND BINDING |
| CCKBR     | 2  | 5.36E+02 | 0.553 | GPCR LIGAND BINDING |
| GPR35     | 9  | 1.59E+04 | 0.553 | GPCR LIGAND BINDING |
| LPAR2     | 2  | 1.59E+03 | 0.554 | GPCR LIGAND BINDING |
| CCR1      | 3  | 1.03E+03 | 0.554 | GPCR LIGAND BINDING |
| HTR1D     | 5  | 1.45E+03 | 0.558 | GPCR LIGAND BINDING |
| MCHR2     | 1  | 1.26E+03 | 0.564 | GPCR LIGAND BINDING |
| GHSR      | 3  | 8.21E+02 | 0.565 | GPCR LIGAND BINDING |
| ADRB3     | 5  | 1.22E+03 | 0.565 | GPCR LIGAND BINDING |
| ADORA1    | 4  | 1.27E+03 | 0.566 | GPCR LIGAND BINDING |
| TAAR5     | 11 | 7.90E+03 | 0.567 | GPCR LIGAND BINDING |
| ADORA2A   | 4  | 7.09E+02 | 0.579 | GPCR LIGAND BINDING |
| TAS2R31   | 9  | 2.08E+04 | 0.579 | GPCR LIGAND BINDING |
| EDN2      | 2  | 8.08E+02 | 0.582 | GPCR LIGAND BINDING |
| TAAR6     | 8  | 6.24E+03 | 0.583 | GPCR LIGAND BINDING |
| HCRTR1    | 6  | 2.57E+03 | 0.584 | GPCR LIGAND BINDING |
| ADRA1A    | 11 | 1.61E+04 | 0.586 | GPCR LIGAND BINDING |
| OPRD1     | 2  | 4.06E+02 | 0.587 | GPCR LIGAND BINDING |
| GPR68     | 3  | 6.43E+02 | 0.588 | GPCR LIGAND BINDING |
| SCTR      | 6  | 6.15E+03 | 0.589 | GPCR LIGAND BINDING |
| TRH       | 1  | 4.51E+02 | 0.591 | GPCR LIGAND BINDING |
| FPR1      | 5  | 2.74E+03 | 0.591 | GPCR LIGAND BINDING |
| SAA1      | 6  | 3.52E+03 | 0.597 | GPCR LIGAND BINDING |
| CRHR1     | 4  | 7.95E+03 | 0.597 | GPCR LIGAND BINDING |
| ADM       | 2  | 1.17E+03 | 0.598 | GPCR LIGAND BINDING |
| P2RY13    | 2  | 3.58E+03 | 0.602 | GPCR LIGAND BINDING |
| PROK1     | 1  | 3.60E+01 | 0.608 | GPCR LIGAND BINDING |
| P2RY11    | 9  | 8.60E+03 | 0.608 | GPCR LIGAND BINDING |
| PNOC      | 2  | 2.92E+02 | 0.610 | GPCR LIGAND BINDING |
| TAAR1     | 1  | 5.50E+01 | 0.616 | GPCR LIGAND BINDING |
| TAS2R40   | 4  | 7.39E+02 | 0.618 | GPCR LIGAND BINDING |
| NPFF      | 2  | 4.01E+02 | 0.626 | GPCR LIGAND BINDING |
| GNG12     | 2  | 4.72E+02 | 0.627 | GPCR LIGAND BINDING |
| BDKRB1    | 6  | 2.20E+03 | 0.629 | GPCR LIGAND BINDING |
| GNB5      | 1  | 3.69E+02 | 0.629 | GPCR LIGAND BINDING |
| GLP2R     | 5  | 3.84E+03 | 0.631 | GPCR LIGAND BINDING |

|         |    |          |       |                     |
|---------|----|----------|-------|---------------------|
| FZD5    | 3  | 1.22E+03 | 0.633 | GPCR LIGAND BINDING |
| GALR3   | 11 | 8.22E+03 | 0.634 | GPCR LIGAND BINDING |
| KISS1R  | 2  | 5.28E+02 | 0.635 | GPCR LIGAND BINDING |
| GABBR2  | 1  | 5.62E+01 | 0.635 | GPCR LIGAND BINDING |
| PTHLH   | 1  | 4.74E+01 | 0.637 | GPCR LIGAND BINDING |
| SCT     | 2  | 4.99E+02 | 0.646 | GPCR LIGAND BINDING |
| TAS2R19 | 5  | 7.01E+03 | 0.647 | GPCR LIGAND BINDING |
| PRLHR   | 3  | 3.97E+02 | 0.648 | GPCR LIGAND BINDING |
| TAAR2   | 4  | 5.91E+02 | 0.650 | GPCR LIGAND BINDING |
| TAS2R1  | 2  | 7.80E+02 | 0.653 | GPCR LIGAND BINDING |
| CCKAR   | 3  | 1.40E+03 | 0.653 | GPCR LIGAND BINDING |
| CASR    | 6  | 2.50E+03 | 0.656 | GPCR LIGAND BINDING |
| OPN5    | 2  | 3.82E+02 | 0.658 | GPCR LIGAND BINDING |
| MTNR1A  | 7  | 5.22E+03 | 0.662 | GPCR LIGAND BINDING |
| P2RY12  | 2  | 2.55E+02 | 0.662 | GPCR LIGAND BINDING |
| GRM8    | 3  | 4.28E+02 | 0.664 | GPCR LIGAND BINDING |
| HCAR3   | 7  | 1.20E+03 | 0.665 | GPCR LIGAND BINDING |
| OPRL1   | 12 | 7.90E+03 | 0.665 | GPCR LIGAND BINDING |
| NPFFR2  | 4  | 6.97E+02 | 0.666 | GPCR LIGAND BINDING |
| PTCH2   | 8  | 6.06E+03 | 0.668 | GPCR LIGAND BINDING |
| HCRT    | 1  | 2.83E+01 | 0.670 | GPCR LIGAND BINDING |
| FPR3    | 1  | 7.26E+01 | 0.671 | GPCR LIGAND BINDING |
| S1PR3   | 8  | 6.21E+03 | 0.682 | GPCR LIGAND BINDING |
| MCHR1   | 7  | 6.51E+03 | 0.683 | GPCR LIGAND BINDING |
| CXCL16  | 5  | 1.84E+03 | 0.684 | GPCR LIGAND BINDING |
| FZD10   | 4  | 5.13E+02 | 0.686 | GPCR LIGAND BINDING |
| FZD6    | 4  | 1.31E+03 | 0.687 | GPCR LIGAND BINDING |
| CCL28   | 1  | 5.41E+01 | 0.688 | GPCR LIGAND BINDING |
| P2RY14  | 2  | 2.63E+02 | 0.689 | GPCR LIGAND BINDING |
| F2RL3   | 9  | 2.92E+03 | 0.689 | GPCR LIGAND BINDING |
| CCR5    | 10 | 4.76E+03 | 0.692 | GPCR LIGAND BINDING |
| RLN3    | 1  | 2.75E+02 | 0.693 | GPCR LIGAND BINDING |
| C3      | 10 | 2.84E+03 | 0.694 | GPCR LIGAND BINDING |
| NPBWR2  | 7  | 2.09E+03 | 0.695 | GPCR LIGAND BINDING |
| NPY1R   | 4  | 1.41E+03 | 0.698 | GPCR LIGAND BINDING |
| CCR8    | 2  | 5.78E+02 | 0.698 | GPCR LIGAND BINDING |
| TAS2R9  | 5  | 2.99E+03 | 0.701 | GPCR LIGAND BINDING |
| TAS2R4  | 4  | 9.02E+02 | 0.703 | GPCR LIGAND BINDING |
| HTR4    | 4  | 9.27E+02 | 0.703 | GPCR LIGAND BINDING |
| CCR10   | 1  | 1.64E+02 | 0.705 | GPCR LIGAND BINDING |
| EDN1    | 7  | 9.31E+02 | 0.706 | GPCR LIGAND BINDING |
| ADGRE1  | 15 | 1.47E+04 | 0.709 | GPCR LIGAND BINDING |
| MLN     | 4  | 7.34E+02 | 0.710 | GPCR LIGAND BINDING |
| UTS2R   | 5  | 2.45E+03 | 0.712 | GPCR LIGAND BINDING |
| HTR7    | 3  | 2.25E+03 | 0.713 | GPCR LIGAND BINDING |
| CALCA   | 3  | 5.33E+03 | 0.716 | GPCR LIGAND BINDING |
| ADORA3  | 3  | 1.40E+03 | 0.716 | GPCR LIGAND BINDING |
| GRM1    | 9  | 1.10E+04 | 0.716 | GPCR LIGAND BINDING |
| TAS2R20 | 1  | 2.15E+01 | 0.717 | GPCR LIGAND BINDING |
| XCR1    | 2  | 6.45E+02 | 0.718 | GPCR LIGAND BINDING |
| GNB2    | 1  | 3.27E+01 | 0.721 | GPCR LIGAND BINDING |
| CXCR2   | 5  | 9.70E+02 | 0.723 | GPCR LIGAND BINDING |
| CXCL10  | 1  | 3.16E+02 | 0.723 | GPCR LIGAND BINDING |
| SSTR2   | 2  | 1.37E+02 | 0.730 | GPCR LIGAND BINDING |
| NTSR1   | 15 | 7.46E+03 | 0.732 | GPCR LIGAND BINDING |
| PYY     | 1  | 3.07E+01 | 0.741 | GPCR LIGAND BINDING |
| GRM2    | 10 | 2.77E+03 | 0.744 | GPCR LIGAND BINDING |
| HCAR2   | 4  | 7.46E+02 | 0.746 | GPCR LIGAND BINDING |
| EDNRB   | 4  | 4.16E+03 | 0.746 | GPCR LIGAND BINDING |
| GAL     | 2  | 9.09E+02 | 0.754 | GPCR LIGAND BINDING |
| LPAR6   | 3  | 1.01E+03 | 0.761 | GPCR LIGAND BINDING |
| FZD8    | 4  | 4.99E+02 | 0.762 | GPCR LIGAND BINDING |
| OPN3    | 12 | 3.26E+03 | 0.770 | GPCR LIGAND BINDING |
| TAS2R41 | 4  | 5.80E+02 | 0.773 | GPCR LIGAND BINDING |
| TAS1R2  | 10 | 2.99E+03 | 0.773 | GPCR LIGAND BINDING |
| NTSR2   | 7  | 2.75E+03 | 0.775 | GPCR LIGAND BINDING |
| WNT2B   | 6  | 1.22E+03 | 0.777 | GPCR LIGAND BINDING |
| LHB     | 3  | 1.75E+03 | 0.780 | GPCR LIGAND BINDING |
| FZD2    | 4  | 1.70E+03 | 0.783 | GPCR LIGAND BINDING |
| VIPR1   | 6  | 9.78E+02 | 0.785 | GPCR LIGAND BINDING |
| ADORA2B | 2  | 8.40E+01 | 0.789 | GPCR LIGAND BINDING |
| RXFP1   | 3  | 2.71E+02 | 0.792 | GPCR LIGAND BINDING |
| CX3CR1  | 7  | 2.48E+03 | 0.795 | GPCR LIGAND BINDING |
| CXCL12  | 2  | 1.32E+02 | 0.797 | GPCR LIGAND BINDING |

|         |    |          |       |                     |
|---------|----|----------|-------|---------------------|
| WNT9B   | 4  | 6.78E+02 | 0.797 | GPCR LIGAND BINDING |
| PDYN    | 5  | 1.17E+03 | 0.806 | GPCR LIGAND BINDING |
| HCRT2   | 4  | 1.35E+03 | 0.809 | GPCR LIGAND BINDING |
| PTGDR2  | 4  | 1.53E+02 | 0.809 | GPCR LIGAND BINDING |
| SHH     | 2  | 1.20E+02 | 0.810 | GPCR LIGAND BINDING |
| AGTR1   | 4  | 5.93E+02 | 0.816 | GPCR LIGAND BINDING |
| NPY4R   | 6  | 8.62E+02 | 0.818 | GPCR LIGAND BINDING |
| OXER1   | 9  | 7.23E+03 | 0.819 | GPCR LIGAND BINDING |
| RXFP2   | 8  | 4.25E+03 | 0.819 | GPCR LIGAND BINDING |
| RHO     | 1  | 1.37E+01 | 0.821 | GPCR LIGAND BINDING |
| ADGRE2  | 14 | 7.81E+03 | 0.823 | GPCR LIGAND BINDING |
| AGT     | 12 | 1.42E+03 | 0.831 | GPCR LIGAND BINDING |
| OXTR    | 5  | 1.39E+03 | 0.831 | GPCR LIGAND BINDING |
| TAS2R60 | 2  | 3.80E+02 | 0.833 | GPCR LIGAND BINDING |
| GLP1R   | 8  | 1.62E+03 | 0.834 | GPCR LIGAND BINDING |
| HTR2A   | 4  | 1.62E+03 | 0.843 | GPCR LIGAND BINDING |
| RGR     | 5  | 3.68E+02 | 0.844 | GPCR LIGAND BINDING |
| SSTR1   | 1  | 5.80E+00 | 0.848 | GPCR LIGAND BINDING |
| TAS2R5  | 7  | 2.55E+03 | 0.849 | GPCR LIGAND BINDING |
| GNRH2   | 3  | 4.53E+02 | 0.850 | GPCR LIGAND BINDING |
| ECE1    | 3  | 6.76E+02 | 0.852 | GPCR LIGAND BINDING |
| EDN3    | 1  | 7.52E+00 | 0.854 | GPCR LIGAND BINDING |
| HRH1    | 6  | 6.30E+02 | 0.857 | GPCR LIGAND BINDING |
| HTR1F   | 1  | 4.98E+01 | 0.857 | GPCR LIGAND BINDING |
| FZD1    | 3  | 2.57E+02 | 0.863 | GPCR LIGAND BINDING |
| CALCRL  | 1  | 2.34E+01 | 0.864 | GPCR LIGAND BINDING |
| GNG13   | 1  | 3.52E+00 | 0.869 | GPCR LIGAND BINDING |
| GPR65   | 1  | 6.27E+00 | 0.870 | GPCR LIGAND BINDING |
| PTGER2  | 2  | 1.14E+03 | 0.871 | GPCR LIGAND BINDING |
| AVPR1A  | 4  | 1.37E+03 | 0.875 | GPCR LIGAND BINDING |
| GNB4    | 1  | 2.78E+01 | 0.877 | GPCR LIGAND BINDING |
| MTNR1B  | 6  | 4.84E+02 | 0.878 | GPCR LIGAND BINDING |
| CHRM5   | 6  | 2.85E+02 | 0.885 | GPCR LIGAND BINDING |
| MC1R    | 17 | 2.05E+03 | 0.891 | GPCR LIGAND BINDING |
| GNG2    | 1  | 3.16E+00 | 0.894 | GPCR LIGAND BINDING |
| TSHR    | 5  | 4.59E+02 | 0.895 | GPCR LIGAND BINDING |
| INSL3   | 6  | 1.27E+03 | 0.899 | GPCR LIGAND BINDING |
| PTGER3  | 1  | 1.97E+01 | 0.901 | GPCR LIGAND BINDING |
| CD55    | 5  | 1.70E+02 | 0.906 | GPCR LIGAND BINDING |
| HTR1E   | 1  | 7.94E+00 | 0.909 | GPCR LIGAND BINDING |
| TAS2R8  | 7  | 9.41E+02 | 0.911 | GPCR LIGAND BINDING |
| CHRM4   | 1  | 2.02E+00 | 0.914 | GPCR LIGAND BINDING |
| AVP     | 1  | 7.11E-01 | 0.976 | GPCR LIGAND BINDING |
| DRD3    | 1  | 1.26E-01 | 0.982 | GPCR LIGAND BINDING |
| ADRA2C  | 1  | 5.32E-02 | 0.983 | GPCR LIGAND BINDING |
| WNT6    | 1  | 1.78E-01 | 0.987 | GPCR LIGAND BINDING |
| PTGER4  | 1  | 2.47E-01 | 0.993 | GPCR LIGAND BINDING |
| CHRM3   | 3  | 2.38E+02 | 1     | GPCR LIGAND BINDING |
| C5AR2   | 2  | 3.91E+01 | 1     | GPCR LIGAND BINDING |
| TAS2R3  | 2  | 5.83E+01 | 1     | GPCR LIGAND BINDING |
| HTR6    | 6  | 5.49E+01 | 1     | GPCR LIGAND BINDING |
| OXGR1   | 2  | 1.50E+02 | 1     | GPCR LIGAND BINDING |
| PTH2R   | 7  | 1.16E+02 | 1     | GPCR LIGAND BINDING |
| P2RY2   | 6  | 1.00E+01 | 1     | GPCR LIGAND BINDING |
| NMUR1   | 8  | 8.72E+01 | 1     | GPCR LIGAND BINDING |
| ACKR1   | 5  | 1.40E+03 | 1     | GPCR LIGAND BINDING |
| LPAR3   | 2  | 2.37E+01 | 1     | GPCR LIGAND BINDING |
| WNT10A  | 9  | 2.00E+03 | 1     | GPCR LIGAND BINDING |
| DRD1    | 2  | 6.12E-01 | 1     | GPCR LIGAND BINDING |
| HRH4    | 2  | 5.02E+01 | 1     | GPCR LIGAND BINDING |
| HCAR1   | 4  | 4.89E+01 | 1     | GPCR LIGAND BINDING |
| ADGRE3  | 8  | 4.95E+02 | 1     | GPCR LIGAND BINDING |
| GNGT1   | 2  | 9.38E-01 | 1     | GPCR LIGAND BINDING |
| WNT1    | 3  | 7.98E+01 | 1     | GPCR LIGAND BINDING |
| XCL2    | 3  | 6.32E+00 | 1     | GPCR LIGAND BINDING |
| PPY     | 2  | 8.53E+00 | 1     | GPCR LIGAND BINDING |
| WNT16   | 2  | 4.00E+01 | 1     | GPCR LIGAND BINDING |
| ADRA2B  | 3  | 7.47E+01 | 1     | GPCR LIGAND BINDING |
| ECE2    | 4  | 4.03E+01 | 1     | GPCR LIGAND BINDING |
| TAS2R7  | 5  | 2.20E+03 | 1     | GPCR LIGAND BINDING |
| XCL1    | 3  | 4.48E+02 | 1     | GPCR LIGAND BINDING |
| BDKRB2  | 2  | 6.28E+00 | 1     | GPCR LIGAND BINDING |
| TAS2R10 | 2  | 2.87E+02 | 1     | GPCR LIGAND BINDING |
| GPR37L1 | 5  | 1.85E+02 | 1     | GPCR LIGAND BINDING |

|      |   |          |   |                     |
|------|---|----------|---|---------------------|
| NMS  | 2 | 1.15E+00 | 1 | GPCR LIGAND BINDING |
| FZD9 | 2 | 1.43E+01 | 1 | GPCR LIGAND BINDING |

| Gene      | NumVar | Q        | Pvalue   | Gene-set             |
|-----------|--------|----------|----------|----------------------|
| ITK       | 5      | 2.47E+04 | 9.38E-05 | INNATE IMMUNE SYSTEM |
| PTPRB     | 25     | 8.07E+04 | 0.001    | INNATE IMMUNE SYSTEM |
| TLR1      | 14     | 6.77E+04 | 0.001    | INNATE IMMUNE SYSTEM |
| FLG2      | 121    | 2.38E+05 | 0.003    | INNATE IMMUNE SYSTEM |
| CEACAM8   | 9      | 4.74E+04 | 0.004    | INNATE IMMUNE SYSTEM |
| MUC4      | 870    | 1.68E+07 | 0.006    | INNATE IMMUNE SYSTEM |
| PRKCE     | 3      | 2.09E+04 | 0.008    | INNATE IMMUNE SYSTEM |
| SERPINB12 | 4      | 3.11E+04 | 0.008    | INNATE IMMUNE SYSTEM |
| SFTPA1    | 6      | 3.50E+04 | 0.009    | INNATE IMMUNE SYSTEM |
| BST1      | 5      | 4.91E+04 | 0.010    | INNATE IMMUNE SYSTEM |
| DSC1      | 4      | 1.17E+04 | 0.010    | INNATE IMMUNE SYSTEM |
| VAMP8     | 2      | 3.94E+03 | 0.012    | INNATE IMMUNE SYSTEM |
| LCN2      | 3      | 8.67E+03 | 0.012    | INNATE IMMUNE SYSTEM |
| PKP1      | 11     | 5.12E+04 | 0.013    | INNATE IMMUNE SYSTEM |
| LRG1      | 5      | 1.13E+04 | 0.013    | INNATE IMMUNE SYSTEM |
| IRAK3     | 6      | 3.71E+04 | 0.015    | INNATE IMMUNE SYSTEM |
| RNASE3    | 4      | 2.06E+04 | 0.015    | INNATE IMMUNE SYSTEM |
| ATP11B    | 7      | 2.55E+04 | 0.016    | INNATE IMMUNE SYSTEM |
| PRG2      | 4      | 7.11E+03 | 0.016    | INNATE IMMUNE SYSTEM |
| C5AR1     | 7      | 4.11E+04 | 0.018    | INNATE IMMUNE SYSTEM |
| NOD1      | 8      | 1.04E+04 | 0.018    | INNATE IMMUNE SYSTEM |
| CAMP      | 3      | 2.50E+04 | 0.019    | INNATE IMMUNE SYSTEM |
| MGST1     | 4      | 9.99E+03 | 0.019    | INNATE IMMUNE SYSTEM |
| APAF1     | 13     | 3.41E+04 | 0.020    | INNATE IMMUNE SYSTEM |
| RAB44     | 19     | 9.95E+04 | 0.021    | INNATE IMMUNE SYSTEM |
| APP       | 2      | 3.42E+03 | 0.021    | INNATE IMMUNE SYSTEM |
| CASP10    | 5      | 1.53E+04 | 0.022    | INNATE IMMUNE SYSTEM |
| B4GALT1   | 1      | 1.34E+03 | 0.022    | INNATE IMMUNE SYSTEM |
| VCP       | 2      | 3.84E+03 | 0.022    | INNATE IMMUNE SYSTEM |
| POLR3GL   | 2      | 5.78E+03 | 0.022    | INNATE IMMUNE SYSTEM |
| KCNAB2    | 3      | 1.01E+04 | 0.023    | INNATE IMMUNE SYSTEM |
| GSDMD     | 4      | 8.67E+03 | 0.023    | INNATE IMMUNE SYSTEM |
| RNASET2   | 2      | 1.25E+04 | 0.024    | INNATE IMMUNE SYSTEM |
| ACTR10    | 2      | 4.89E+03 | 0.029    | INNATE IMMUNE SYSTEM |
| PRTN3     | 4      | 1.84E+04 | 0.030    | INNATE IMMUNE SYSTEM |
| ITLN1     | 3      | 9.72E+03 | 0.033    | INNATE IMMUNE SYSTEM |
| MIF       | 2      | 3.91E+03 | 0.035    | INNATE IMMUNE SYSTEM |
| DYNC1LI1  | 5      | 2.20E+04 | 0.038    | INNATE IMMUNE SYSTEM |
| YPEL5     | 1      | 7.55E+02 | 0.040    | INNATE IMMUNE SYSTEM |
| TBK1      | 4      | 1.84E+04 | 0.040    | INNATE IMMUNE SYSTEM |
| POLR2F    | 3      | 2.15E+04 | 0.041    | INNATE IMMUNE SYSTEM |
| ARG1      | 1      | 2.49E+03 | 0.043    | INNATE IMMUNE SYSTEM |
| NF2       | 1      | 7.04E+02 | 0.043    | INNATE IMMUNE SYSTEM |
| NLRP3     | 5      | 1.80E+04 | 0.044    | INNATE IMMUNE SYSTEM |
| TXK       | 2      | 1.13E+04 | 0.045    | INNATE IMMUNE SYSTEM |
| TRIM21    | 6      | 1.46E+04 | 0.047    | INNATE IMMUNE SYSTEM |
| F2        | 5      | 7.45E+03 | 0.047    | INNATE IMMUNE SYSTEM |
| TRIM32    | 4      | 1.53E+04 | 0.049    | INNATE IMMUNE SYSTEM |
| MUC17     | 222    | 2.02E+06 | 0.049    | INNATE IMMUNE SYSTEM |
| DEFA6     | 2      | 4.27E+03 | 0.049    | INNATE IMMUNE SYSTEM |
| FCAR      | 1      | 7.05E+02 | 0.050    | INNATE IMMUNE SYSTEM |
| CLEC12A   | 3      | 4.36E+03 | 0.051    | INNATE IMMUNE SYSTEM |
| DEFB112   | 1      | 1.36E+03 | 0.056    | INNATE IMMUNE SYSTEM |
| IFNA21    | 3      | 1.61E+04 | 0.058    | INNATE IMMUNE SYSTEM |
| KPNB1     | 2      | 1.18E+04 | 0.058    | INNATE IMMUNE SYSTEM |
| MYO10     | 14     | 1.11E+05 | 0.058    | INNATE IMMUNE SYSTEM |
| MEF2A     | 4      | 9.97E+03 | 0.061    | INNATE IMMUNE SYSTEM |
| HLA-E     | 12     | 7.25E+04 | 0.061    | INNATE IMMUNE SYSTEM |
| IFNB1     | 3      | 2.18E+03 | 0.062    | INNATE IMMUNE SYSTEM |
| DEFA1     | 1      | 6.46E+02 | 0.062    | INNATE IMMUNE SYSTEM |
| DEFA3     | 1      | 6.46E+02 | 0.062    | INNATE IMMUNE SYSTEM |
| DEFA1B    | 1      | 6.46E+02 | 0.062    | INNATE IMMUNE SYSTEM |
| STOM      | 2      | 4.86E+03 | 0.063    | INNATE IMMUNE SYSTEM |
| MAVS      | 5      | 5.63E+03 | 0.064    | INNATE IMMUNE SYSTEM |
| GRAP2     | 3      | 1.21E+04 | 0.066    | INNATE IMMUNE SYSTEM |
| DEFB116   | 2      | 1.52E+04 | 0.067    | INNATE IMMUNE SYSTEM |
| OLFM4     | 4      | 1.68E+04 | 0.068    | INNATE IMMUNE SYSTEM |
| C1S       | 4      | 1.10E+04 | 0.068    | INNATE IMMUNE SYSTEM |
| MAP2K3    | 1      | 3.09E+03 | 0.072    | INNATE IMMUNE SYSTEM |
| DEFB124   | 2      | 7.70E+03 | 0.072    | INNATE IMMUNE SYSTEM |

|          |     |          |       |                      |
|----------|-----|----------|-------|----------------------|
| CDK13    | 9   | 3.51E+04 | 0.074 | INNATE IMMUNE SYSTEM |
| TREM2    | 7   | 1.71E+04 | 0.074 | INNATE IMMUNE SYSTEM |
| CREBBP   | 19  | 3.85E+04 | 0.075 | INNATE IMMUNE SYSTEM |
| MAN2B1   | 13  | 2.40E+04 | 0.077 | INNATE IMMUNE SYSTEM |
| ITPR1    | 13  | 3.91E+04 | 0.079 | INNATE IMMUNE SYSTEM |
| GPI      | 3   | 1.32E+04 | 0.081 | INNATE IMMUNE SYSTEM |
| CSTB     | 1   | 2.44E+03 | 0.082 | INNATE IMMUNE SYSTEM |
| RPS27A   | 1   | 2.69E+03 | 0.087 | INNATE IMMUNE SYSTEM |
| ADGRG3   | 8   | 6.29E+03 | 0.087 | INNATE IMMUNE SYSTEM |
| ITCH     | 11  | 1.79E+04 | 0.088 | INNATE IMMUNE SYSTEM |
| CCR2     | 3   | 1.69E+03 | 0.088 | INNATE IMMUNE SYSTEM |
| COTL1    | 1   | 1.42E+03 | 0.089 | INNATE IMMUNE SYSTEM |
| CD4      | 5   | 1.48E+04 | 0.089 | INNATE IMMUNE SYSTEM |
| PRCP     | 7   | 1.10E+04 | 0.089 | INNATE IMMUNE SYSTEM |
| CAND1    | 4   | 3.76E+03 | 0.090 | INNATE IMMUNE SYSTEM |
| RNF135   | 10  | 3.45E+04 | 0.091 | INNATE IMMUNE SYSTEM |
| TMBIM1   | 4   | 1.63E+04 | 0.093 | INNATE IMMUNE SYSTEM |
| HSPA1A   | 2   | 1.72E+03 | 0.094 | INNATE IMMUNE SYSTEM |
| CYFIP1   | 12  | 3.83E+04 | 0.094 | INNATE IMMUNE SYSTEM |
| GAB2     | 3   | 3.48E+03 | 0.096 | INNATE IMMUNE SYSTEM |
| RPS6KA1  | 4   | 6.96E+03 | 0.097 | INNATE IMMUNE SYSTEM |
| POLR1D   | 1   | 9.24E+03 | 0.097 | INNATE IMMUNE SYSTEM |
| PSAP     | 3   | 3.19E+03 | 0.097 | INNATE IMMUNE SYSTEM |
| ITGAV    | 8   | 6.33E+03 | 0.100 | INNATE IMMUNE SYSTEM |
| RELA     | 3   | 8.06E+03 | 0.100 | INNATE IMMUNE SYSTEM |
| TAX1BP1  | 5   | 1.69E+04 | 0.100 | INNATE IMMUNE SYSTEM |
| CD33     | 7   | 2.10E+04 | 0.101 | INNATE IMMUNE SYSTEM |
| FCER1G   | 1   | 1.28E+03 | 0.103 | INNATE IMMUNE SYSTEM |
| MUC3A    | 58  | 4.50E+05 | 0.104 | INNATE IMMUNE SYSTEM |
| APOB     | 42  | 8.05E+04 | 0.105 | INNATE IMMUNE SYSTEM |
| TKFC     | 8   | 1.43E+04 | 0.106 | INNATE IMMUNE SYSTEM |
| TAB1     | 3   | 2.23E+03 | 0.109 | INNATE IMMUNE SYSTEM |
| PIK3CA   | 2   | 7.43E+03 | 0.109 | INNATE IMMUNE SYSTEM |
| POLR3C   | 4   | 1.15E+04 | 0.109 | INNATE IMMUNE SYSTEM |
| SOS1     | 5   | 1.70E+04 | 0.112 | INNATE IMMUNE SYSTEM |
| MMP8     | 6   | 8.71E+03 | 0.114 | INNATE IMMUNE SYSTEM |
| DNM3     | 3   | 2.15E+03 | 0.118 | INNATE IMMUNE SYSTEM |
| SYNGR1   | 4   | 6.52E+03 | 0.120 | INNATE IMMUNE SYSTEM |
| PRKACB   | 2   | 2.25E+03 | 0.121 | INNATE IMMUNE SYSTEM |
| MUC16    | 190 | 2.15E+05 | 0.122 | INNATE IMMUNE SYSTEM |
| CREG1    | 2   | 1.15E+03 | 0.123 | INNATE IMMUNE SYSTEM |
| METTL7A  | 2   | 2.28E+03 | 0.129 | INNATE IMMUNE SYSTEM |
| DEFB105A | 1   | 7.53E+02 | 0.131 | INNATE IMMUNE SYSTEM |
| DEFB105B | 1   | 7.53E+02 | 0.131 | INNATE IMMUNE SYSTEM |
| ZBP1     | 8   | 2.83E+04 | 0.134 | INNATE IMMUNE SYSTEM |
| PLD1     | 14  | 3.67E+04 | 0.136 | INNATE IMMUNE SYSTEM |
| MAP3K14  | 6   | 1.35E+04 | 0.137 | INNATE IMMUNE SYSTEM |
| RAB3D    | 3   | 3.42E+03 | 0.137 | INNATE IMMUNE SYSTEM |
| AHCYL1   | 1   | 6.32E+02 | 0.138 | INNATE IMMUNE SYSTEM |
| CD44     | 6   | 1.28E+04 | 0.138 | INNATE IMMUNE SYSTEM |
| PAFAH1B2 | 2   | 8.57E+03 | 0.139 | INNATE IMMUNE SYSTEM |
| CASP4    | 4   | 4.33E+03 | 0.141 | INNATE IMMUNE SYSTEM |
| HERC5    | 7   | 9.12E+03 | 0.143 | INNATE IMMUNE SYSTEM |
| QPCT     | 5   | 1.33E+04 | 0.144 | INNATE IMMUNE SYSTEM |
| HSPA1B   | 3   | 4.65E+03 | 0.148 | INNATE IMMUNE SYSTEM |
| ABI1     | 3   | 1.85E+03 | 0.148 | INNATE IMMUNE SYSTEM |
| TMEM179B | 1   | 3.76E+02 | 0.149 | INNATE IMMUNE SYSTEM |
| ATP6VOD2 | 4   | 2.48E+03 | 0.149 | INNATE IMMUNE SYSTEM |
| IMPDH1   | 9   | 1.35E+04 | 0.150 | INNATE IMMUNE SYSTEM |
| DNAJC3   | 2   | 1.63E+03 | 0.151 | INNATE IMMUNE SYSTEM |
| CFHR4    | 11  | 1.63E+04 | 0.152 | INNATE IMMUNE SYSTEM |
| C6       | 15  | 4.10E+04 | 0.152 | INNATE IMMUNE SYSTEM |
| RNF125   | 2   | 2.12E+03 | 0.153 | INNATE IMMUNE SYSTEM |
| MS4A2    | 4   | 9.39E+03 | 0.155 | INNATE IMMUNE SYSTEM |
| CRCP     | 2   | 1.30E+03 | 0.156 | INNATE IMMUNE SYSTEM |
| LIMK1    | 4   | 4.10E+03 | 0.157 | INNATE IMMUNE SYSTEM |
| CCT2     | 1   | 3.77E+02 | 0.158 | INNATE IMMUNE SYSTEM |
| IFNA16   | 3   | 9.57E+03 | 0.159 | INNATE IMMUNE SYSTEM |
| ATP6V1G1 | 1   | 3.06E+03 | 0.160 | INNATE IMMUNE SYSTEM |
| CYB5R3   | 4   | 4.99E+03 | 0.160 | INNATE IMMUNE SYSTEM |
| TLR10    | 11  | 2.53E+04 | 0.161 | INNATE IMMUNE SYSTEM |
| P2RX1    | 2   | 1.55E+03 | 0.162 | INNATE IMMUNE SYSTEM |
| IFNA4    | 5   | 6.09E+03 | 0.163 | INNATE IMMUNE SYSTEM |
| PDAP1    | 2   | 2.73E+03 | 0.164 | INNATE IMMUNE SYSTEM |

|          |     |          |       |                      |
|----------|-----|----------|-------|----------------------|
| CRACR2A  | 10  | 1.53E+04 | 0.164 | INNATE IMMUNE SYSTEM |
| DEGS1    | 3   | 1.05E+04 | 0.165 | INNATE IMMUNE SYSTEM |
| ASAH1    | 10  | 1.65E+04 | 0.167 | INNATE IMMUNE SYSTEM |
| HEXB     | 4   | 9.65E+03 | 0.169 | INNATE IMMUNE SYSTEM |
| CMTM6    | 2   | 1.50E+04 | 0.170 | INNATE IMMUNE SYSTEM |
| CPB2     | 1   | 3.61E+02 | 0.171 | INNATE IMMUNE SYSTEM |
| SDCBP    | 2   | 6.14E+02 | 0.176 | INNATE IMMUNE SYSTEM |
| NCKAP1L  | 7   | 8.43E+03 | 0.179 | INNATE IMMUNE SYSTEM |
| HPSE     | 4   | 8.42E+03 | 0.180 | INNATE IMMUNE SYSTEM |
| MASP2    | 13  | 2.01E+04 | 0.183 | INNATE IMMUNE SYSTEM |
| PLD2     | 12  | 2.39E+04 | 0.183 | INNATE IMMUNE SYSTEM |
| SPTAN1   | 7   | 9.73E+03 | 0.184 | INNATE IMMUNE SYSTEM |
| PIK3R1   | 1   | 3.44E+02 | 0.185 | INNATE IMMUNE SYSTEM |
| CXCR1    | 8   | 1.15E+04 | 0.187 | INNATE IMMUNE SYSTEM |
| IFIH1    | 18  | 3.25E+04 | 0.190 | INNATE IMMUNE SYSTEM |
| MAP2K7   | 1   | 1.09E+03 | 0.190 | INNATE IMMUNE SYSTEM |
| SIGLEC15 | 7   | 8.60E+03 | 0.192 | INNATE IMMUNE SYSTEM |
| CHIT1    | 4   | 9.19E+03 | 0.193 | INNATE IMMUNE SYSTEM |
| SERPING1 | 6   | 4.88E+03 | 0.193 | INNATE IMMUNE SYSTEM |
| PDXK     | 4   | 3.27E+03 | 0.195 | INNATE IMMUNE SYSTEM |
| CR2      | 12  | 1.96E+04 | 0.195 | INNATE IMMUNE SYSTEM |
| COLEC10  | 3   | 2.89E+03 | 0.196 | INNATE IMMUNE SYSTEM |
| LILRB2   | 32  | 2.02E+05 | 0.196 | INNATE IMMUNE SYSTEM |
| CRISPLD2 | 8   | 2.20E+04 | 0.197 | INNATE IMMUNE SYSTEM |
| LPO      | 7   | 4.56E+03 | 0.198 | INNATE IMMUNE SYSTEM |
| NAPRT    | 7   | 7.44E+03 | 0.199 | INNATE IMMUNE SYSTEM |
| CEACAM1  | 10  | 2.58E+04 | 0.199 | INNATE IMMUNE SYSTEM |
| ROCK1    | 3   | 1.09E+04 | 0.202 | INNATE IMMUNE SYSTEM |
| CAT      | 2   | 3.89E+03 | 0.202 | INNATE IMMUNE SYSTEM |
| LAT2     | 4   | 9.49E+03 | 0.202 | INNATE IMMUNE SYSTEM |
| ADAM10   | 2   | 1.51E+03 | 0.202 | INNATE IMMUNE SYSTEM |
| NFKBIB   | 6   | 8.27E+03 | 0.203 | INNATE IMMUNE SYSTEM |
| TLR2     | 9   | 1.23E+04 | 0.205 | INNATE IMMUNE SYSTEM |
| HMOX2    | 4   | 4.91E+03 | 0.205 | INNATE IMMUNE SYSTEM |
| PSEN1    | 1   | 5.96E+03 | 0.209 | INNATE IMMUNE SYSTEM |
| HSP90AB1 | 2   | 8.68E+02 | 0.211 | INNATE IMMUNE SYSTEM |
| PRKCD    | 5   | 4.92E+03 | 0.211 | INNATE IMMUNE SYSTEM |
| TMEM63A  | 9   | 1.25E+04 | 0.213 | INNATE IMMUNE SYSTEM |
| NLRC4    | 3   | 1.14E+04 | 0.214 | INNATE IMMUNE SYSTEM |
| WIPF1    | 6   | 4.34E+03 | 0.214 | INNATE IMMUNE SYSTEM |
| PLCG1    | 4   | 2.21E+03 | 0.215 | INNATE IMMUNE SYSTEM |
| BIRC2    | 1   | 1.56E+03 | 0.217 | INNATE IMMUNE SYSTEM |
| MUC5B    | 234 | 3.54E+05 | 0.221 | INNATE IMMUNE SYSTEM |
| WIPF2    | 2   | 4.10E+03 | 0.221 | INNATE IMMUNE SYSTEM |
| FOLR3    | 3   | 2.23E+03 | 0.223 | INNATE IMMUNE SYSTEM |
| IQGAP1   | 8   | 1.26E+04 | 0.226 | INNATE IMMUNE SYSTEM |
| LEAP2    | 1   | 2.81E+02 | 0.227 | INNATE IMMUNE SYSTEM |
| RAB27A   | 6   | 1.83E+03 | 0.227 | INNATE IMMUNE SYSTEM |
| NCF1     | 3   | 8.53E+03 | 0.229 | INNATE IMMUNE SYSTEM |
| DEFB118  | 3   | 4.08E+03 | 0.230 | INNATE IMMUNE SYSTEM |
| CD14     | 1   | 5.36E+02 | 0.232 | INNATE IMMUNE SYSTEM |
| PRSS2    | 15  | 4.17E+04 | 0.232 | INNATE IMMUNE SYSTEM |
| XRCC6    | 1   | 4.10E+02 | 0.232 | INNATE IMMUNE SYSTEM |
| NFATC2   | 4   | 7.85E+03 | 0.232 | INNATE IMMUNE SYSTEM |
| MUC6     | 40  | 7.95E+04 | 0.234 | INNATE IMMUNE SYSTEM |
| IKBKB    | 6   | 3.11E+03 | 0.234 | INNATE IMMUNE SYSTEM |
| WIPF3    | 9   | 1.33E+04 | 0.236 | INNATE IMMUNE SYSTEM |
| SIRPA    | 5   | 1.11E+04 | 0.237 | INNATE IMMUNE SYSTEM |
| IFI16    | 12  | 3.80E+04 | 0.239 | INNATE IMMUNE SYSTEM |
| POLR2H   | 1   | 2.97E+03 | 0.240 | INNATE IMMUNE SYSTEM |
| OLR1     | 1   | 3.17E+02 | 0.240 | INNATE IMMUNE SYSTEM |
| TNFRSF1B | 3   | 1.83E+03 | 0.242 | INNATE IMMUNE SYSTEM |
| NFASC    | 15  | 4.25E+04 | 0.244 | INNATE IMMUNE SYSTEM |
| SLC11A1  | 11  | 1.91E+04 | 0.244 | INNATE IMMUNE SYSTEM |
| DEFB128  | 3   | 7.02E+03 | 0.244 | INNATE IMMUNE SYSTEM |
| CHUK     | 4   | 4.16E+03 | 0.245 | INNATE IMMUNE SYSTEM |
| DBNL     | 6   | 1.02E+04 | 0.246 | INNATE IMMUNE SYSTEM |
| SFTPD    | 1   | 1.40E+03 | 0.247 | INNATE IMMUNE SYSTEM |
| PPP3CA   | 2   | 8.30E+02 | 0.249 | INNATE IMMUNE SYSTEM |
| CST3     | 1   | 4.78E+02 | 0.251 | INNATE IMMUNE SYSTEM |
| AOC1     | 5   | 3.53E+03 | 0.252 | INNATE IMMUNE SYSTEM |
| FABP5    | 1   | 1.56E+03 | 0.254 | INNATE IMMUNE SYSTEM |
| AIM2     | 3   | 3.46E+03 | 0.254 | INNATE IMMUNE SYSTEM |
| RNASE7   | 2   | 1.62E+03 | 0.255 | INNATE IMMUNE SYSTEM |

|             |     |          |       |                      |
|-------------|-----|----------|-------|----------------------|
| CD180       | 9   | 1.30E+04 | 0.256 | INNATE IMMUNE SYSTEM |
| ARPC2       | 2   | 7.09E+02 | 0.260 | INNATE IMMUNE SYSTEM |
| C6orf120    | 6   | 7.47E+03 | 0.261 | INNATE IMMUNE SYSTEM |
| ELMO1       | 7   | 9.12E+03 | 0.264 | INNATE IMMUNE SYSTEM |
| EEF2        | 1   | 2.17E+02 | 0.267 | INNATE IMMUNE SYSTEM |
| TLR6        | 11  | 1.91E+04 | 0.268 | INNATE IMMUNE SYSTEM |
| MUC21       | 84  | 6.98E+05 | 0.268 | INNATE IMMUNE SYSTEM |
| PSMB6       | 1   | 3.10E+03 | 0.270 | INNATE IMMUNE SYSTEM |
| ALDH3B1     | 7   | 4.36E+03 | 0.271 | INNATE IMMUNE SYSTEM |
| ATP6V0E2    | 6   | 2.91E+03 | 0.273 | INNATE IMMUNE SYSTEM |
| LRRC7       | 4   | 6.65E+03 | 0.279 | INNATE IMMUNE SYSTEM |
| RAB4B       | 3   | 8.82E+02 | 0.281 | INNATE IMMUNE SYSTEM |
| ATP6V1E2    | 2   | 2.78E+03 | 0.281 | INNATE IMMUNE SYSTEM |
| MANBA       | 4   | 6.91E+03 | 0.283 | INNATE IMMUNE SYSTEM |
| MBL2        | 2   | 5.35E+03 | 0.283 | INNATE IMMUNE SYSTEM |
| HP          | 1   | 1.98E+03 | 0.284 | INNATE IMMUNE SYSTEM |
| CFB         | 5   | 1.19E+04 | 0.285 | INNATE IMMUNE SYSTEM |
| BTRC        | 3   | 1.17E+03 | 0.285 | INNATE IMMUNE SYSTEM |
| TIRAP       | 3   | 8.35E+03 | 0.288 | INNATE IMMUNE SYSTEM |
| IFNA8       | 2   | 6.26E+02 | 0.288 | INNATE IMMUNE SYSTEM |
| RASGRP4     | 5   | 1.20E+04 | 0.292 | INNATE IMMUNE SYSTEM |
| DEFB135     | 2   | 6.17E+02 | 0.294 | INNATE IMMUNE SYSTEM |
| C5          | 12  | 1.23E+04 | 0.294 | INNATE IMMUNE SYSTEM |
| LAT         | 2   | 4.60E+02 | 0.296 | INNATE IMMUNE SYSTEM |
| RNASE2      | 1   | 6.38E+02 | 0.298 | INNATE IMMUNE SYSTEM |
| ACLY        | 9   | 4.56E+03 | 0.298 | INNATE IMMUNE SYSTEM |
| SLCO4C1     | 5   | 2.16E+03 | 0.299 | INNATE IMMUNE SYSTEM |
| PIK3R2      | 7   | 5.87E+03 | 0.300 | INNATE IMMUNE SYSTEM |
| C1R         | 7   | 5.30E+03 | 0.301 | INNATE IMMUNE SYSTEM |
| DEFB108B    | 1   | 7.13E+02 | 0.301 | INNATE IMMUNE SYSTEM |
| PRKDC       | 32  | 3.16E+04 | 0.301 | INNATE IMMUNE SYSTEM |
| ATP6V1C2    | 5   | 2.72E+03 | 0.303 | INNATE IMMUNE SYSTEM |
| PLA2G6      | 13  | 1.27E+04 | 0.304 | INNATE IMMUNE SYSTEM |
| NCKIPSD     | 8   | 1.58E+04 | 0.304 | INNATE IMMUNE SYSTEM |
| MAPK7       | 5   | 3.72E+03 | 0.306 | INNATE IMMUNE SYSTEM |
| CCR6        | 1   | 3.00E+03 | 0.307 | INNATE IMMUNE SYSTEM |
| MUC5AC      | 201 | 2.34E+05 | 0.307 | INNATE IMMUNE SYSTEM |
| CXCL1       | 1   | 7.24E+02 | 0.308 | INNATE IMMUNE SYSTEM |
| NCKAP1      | 2   | 5.37E+02 | 0.312 | INNATE IMMUNE SYSTEM |
| ATP6V1G3    | 3   | 1.44E+03 | 0.313 | INNATE IMMUNE SYSTEM |
| JUN         | 1   | 4.28E+02 | 0.314 | INNATE IMMUNE SYSTEM |
| MUC20       | 14  | 2.38E+04 | 0.315 | INNATE IMMUNE SYSTEM |
| ATP8A1      | 6   | 1.28E+04 | 0.315 | INNATE IMMUNE SYSTEM |
| CEACAM3     | 10  | 4.68E+04 | 0.316 | INNATE IMMUNE SYSTEM |
| SEMG1       | 12  | 2.89E+04 | 0.317 | INNATE IMMUNE SYSTEM |
| MUC13       | 5   | 7.88E+03 | 0.317 | INNATE IMMUNE SYSTEM |
| TCN1        | 4   | 5.72E+03 | 0.320 | INNATE IMMUNE SYSTEM |
| EEA1        | 14  | 1.83E+04 | 0.322 | INNATE IMMUNE SYSTEM |
| NOD2        | 32  | 2.88E+04 | 0.323 | INNATE IMMUNE SYSTEM |
| MYD88       | 2   | 5.52E+02 | 0.323 | INNATE IMMUNE SYSTEM |
| TRAF2       | 2   | 1.30E+03 | 0.323 | INNATE IMMUNE SYSTEM |
| CNPY3       | 1   | 1.92E+02 | 0.324 | INNATE IMMUNE SYSTEM |
| CLEC6A      | 4   | 6.22E+03 | 0.325 | INNATE IMMUNE SYSTEM |
| GSTP1       | 5   | 1.88E+03 | 0.329 | INNATE IMMUNE SYSTEM |
| CYBA        | 2   | 2.95E+03 | 0.329 | INNATE IMMUNE SYSTEM |
| NFATC1      | 14  | 1.41E+04 | 0.329 | INNATE IMMUNE SYSTEM |
| LGALS3      | 4   | 2.30E+03 | 0.330 | INNATE IMMUNE SYSTEM |
| CD300LB     | 1   | 1.51E+02 | 0.330 | INNATE IMMUNE SYSTEM |
| MAP3K8      | 2   | 8.52E+02 | 0.330 | INNATE IMMUNE SYSTEM |
| CTSZ        | 3   | 3.74E+03 | 0.331 | INNATE IMMUNE SYSTEM |
| MGAM        | 37  | 3.44E+04 | 0.333 | INNATE IMMUNE SYSTEM |
| EPPIN       | 2   | 3.62E+03 | 0.336 | INNATE IMMUNE SYSTEM |
| EPPIN-WFDC6 | 2   | 3.62E+03 | 0.336 | INNATE IMMUNE SYSTEM |
| IFNA10      | 8   | 1.60E+04 | 0.337 | INNATE IMMUNE SYSTEM |
| CNN2        | 2   | 6.90E+02 | 0.337 | INNATE IMMUNE SYSTEM |
| DSP         | 23  | 2.38E+04 | 0.339 | INNATE IMMUNE SYSTEM |
| MYO9B       | 22  | 2.45E+04 | 0.339 | INNATE IMMUNE SYSTEM |
| CPNE1       | 8   | 1.01E+04 | 0.340 | INNATE IMMUNE SYSTEM |
| PTAFR       | 3   | 2.22E+03 | 0.341 | INNATE IMMUNE SYSTEM |
| GMFG        | 2   | 1.06E+03 | 0.341 | INNATE IMMUNE SYSTEM |
| GM2A        | 3   | 4.62E+03 | 0.343 | INNATE IMMUNE SYSTEM |
| HLA-C       | 4   | 3.98E+03 | 0.343 | INNATE IMMUNE SYSTEM |
| FGL2        | 1   | 4.56E+02 | 0.344 | INNATE IMMUNE SYSTEM |
| C1QA        | 3   | 2.79E+03 | 0.345 | INNATE IMMUNE SYSTEM |

|          |    |          |       |                      |
|----------|----|----------|-------|----------------------|
| UBR4     | 22 | 1.96E+04 | 0.346 | INNATE IMMUNE SYSTEM |
| EPX      | 8  | 1.51E+04 | 0.346 | INNATE IMMUNE SYSTEM |
| GNS      | 3  | 1.13E+03 | 0.346 | INNATE IMMUNE SYSTEM |
| NPC2     | 4  | 6.14E+03 | 0.348 | INNATE IMMUNE SYSTEM |
| PSMC5    | 1  | 2.08E+02 | 0.350 | INNATE IMMUNE SYSTEM |
| TCIRG1   | 12 | 1.37E+04 | 0.354 | INNATE IMMUNE SYSTEM |
| WASF3    | 7  | 1.35E+04 | 0.355 | INNATE IMMUNE SYSTEM |
| AP2A2    | 5  | 3.59E+03 | 0.360 | INNATE IMMUNE SYSTEM |
| MVP      | 6  | 4.23E+03 | 0.360 | INNATE IMMUNE SYSTEM |
| CHI3L1   | 5  | 2.95E+03 | 0.360 | INNATE IMMUNE SYSTEM |
| PKM      | 6  | 1.19E+04 | 0.361 | INNATE IMMUNE SYSTEM |
| PECAM1   | 4  | 3.54E+03 | 0.361 | INNATE IMMUNE SYSTEM |
| MYH2     | 11 | 1.60E+04 | 0.361 | INNATE IMMUNE SYSTEM |
| C1orf35  | 2  | 9.06E+03 | 0.362 | INNATE IMMUNE SYSTEM |
| APEH     | 4  | 9.74E+02 | 0.363 | INNATE IMMUNE SYSTEM |
| CARD9    | 6  | 7.94E+03 | 0.368 | INNATE IMMUNE SYSTEM |
| TICAM2   | 2  | 5.57E+02 | 0.368 | INNATE IMMUNE SYSTEM |
| RIPK3    | 6  | 2.66E+03 | 0.368 | INNATE IMMUNE SYSTEM |
| HMGB1    | 3  | 1.96E+03 | 0.370 | INNATE IMMUNE SYSTEM |
| TNIP2    | 7  | 8.26E+03 | 0.372 | INNATE IMMUNE SYSTEM |
| TLR3     | 6  | 3.26E+03 | 0.373 | INNATE IMMUNE SYSTEM |
| TXNIP    | 4  | 5.60E+03 | 0.373 | INNATE IMMUNE SYSTEM |
| LY86     | 5  | 2.45E+03 | 0.374 | INNATE IMMUNE SYSTEM |
| POLR1C   | 11 | 4.35E+03 | 0.375 | INNATE IMMUNE SYSTEM |
| NLRP1    | 19 | 3.05E+04 | 0.376 | INNATE IMMUNE SYSTEM |
| S100A11  | 1  | 6.98E+02 | 0.376 | INNATE IMMUNE SYSTEM |
| OSCAR    | 4  | 9.72E+03 | 0.376 | INNATE IMMUNE SYSTEM |
| MYO5A    | 10 | 1.11E+04 | 0.378 | INNATE IMMUNE SYSTEM |
| CLEC4A   | 1  | 2.61E+03 | 0.380 | INNATE IMMUNE SYSTEM |
| QSOX1    | 7  | 1.18E+04 | 0.383 | INNATE IMMUNE SYSTEM |
| LY96     | 2  | 3.84E+03 | 0.384 | INNATE IMMUNE SYSTEM |
| CTSS     | 1  | 2.34E+02 | 0.384 | INNATE IMMUNE SYSTEM |
| ANXA2    | 2  | 8.14E+02 | 0.386 | INNATE IMMUNE SYSTEM |
| DEFB119  | 4  | 2.67E+03 | 0.387 | INNATE IMMUNE SYSTEM |
| IGF2R    | 28 | 1.97E+04 | 0.387 | INNATE IMMUNE SYSTEM |
| PLAUR    | 7  | 7.17E+03 | 0.389 | INNATE IMMUNE SYSTEM |
| DHX58    | 8  | 1.48E+04 | 0.389 | INNATE IMMUNE SYSTEM |
| MALT1    | 5  | 1.87E+03 | 0.391 | INNATE IMMUNE SYSTEM |
| LGMN     | 4  | 6.40E+03 | 0.392 | INNATE IMMUNE SYSTEM |
| MUC15    | 4  | 4.94E+03 | 0.392 | INNATE IMMUNE SYSTEM |
| FCN2     | 4  | 6.43E+03 | 0.392 | INNATE IMMUNE SYSTEM |
| BAIAP2   | 1  | 2.86E+02 | 0.393 | INNATE IMMUNE SYSTEM |
| FCER1A   | 6  | 7.08E+03 | 0.393 | INNATE IMMUNE SYSTEM |
| NOS1     | 17 | 1.54E+04 | 0.393 | INNATE IMMUNE SYSTEM |
| ITPR2    | 10 | 9.65E+03 | 0.393 | INNATE IMMUNE SYSTEM |
| STBD1    | 4  | 1.70E+03 | 0.393 | INNATE IMMUNE SYSTEM |
| SIRPB1   | 7  | 7.39E+03 | 0.393 | INNATE IMMUNE SYSTEM |
| ATF2     | 2  | 8.12E+02 | 0.394 | INNATE IMMUNE SYSTEM |
| FYN      | 5  | 5.77E+03 | 0.395 | INNATE IMMUNE SYSTEM |
| SCAMP1   | 1  | 9.50E+01 | 0.396 | INNATE IMMUNE SYSTEM |
| MAPKAPK3 | 1  | 4.60E+02 | 0.396 | INNATE IMMUNE SYSTEM |
| PIK3C3   | 1  | 2.37E+02 | 0.396 | INNATE IMMUNE SYSTEM |
| DEFB129  | 2  | 1.53E+03 | 0.396 | INNATE IMMUNE SYSTEM |
| PPIE     | 5  | 1.05E+04 | 0.398 | INNATE IMMUNE SYSTEM |
| HTN3     | 1  | 2.00E+03 | 0.401 | INNATE IMMUNE SYSTEM |
| SERPINA3 | 4  | 3.96E+03 | 0.401 | INNATE IMMUNE SYSTEM |
| FTH1     | 1  | 5.83E+02 | 0.409 | INNATE IMMUNE SYSTEM |
| PLEKHO2  | 8  | 1.53E+04 | 0.409 | INNATE IMMUNE SYSTEM |
| HTN1     | 2  | 1.21E+03 | 0.410 | INNATE IMMUNE SYSTEM |
| DEFA5    | 3  | 7.11E+03 | 0.410 | INNATE IMMUNE SYSTEM |
| GRN      | 7  | 4.24E+03 | 0.412 | INNATE IMMUNE SYSTEM |
| DHX36    | 3  | 1.79E+03 | 0.413 | INNATE IMMUNE SYSTEM |
| PSMB11   | 7  | 1.01E+04 | 0.414 | INNATE IMMUNE SYSTEM |
| PSMB9    | 5  | 8.02E+03 | 0.415 | INNATE IMMUNE SYSTEM |
| BPI      | 9  | 1.46E+04 | 0.415 | INNATE IMMUNE SYSTEM |
| LAMTOR1  | 1  | 1.84E+02 | 0.415 | INNATE IMMUNE SYSTEM |
| FCGR1A   | 2  | 5.09E+02 | 0.417 | INNATE IMMUNE SYSTEM |
| DDX58    | 7  | 1.02E+04 | 0.417 | INNATE IMMUNE SYSTEM |
| PTPN4    | 5  | 1.03E+04 | 0.418 | INNATE IMMUNE SYSTEM |
| UBE2M    | 1  | 8.16E+02 | 0.418 | INNATE IMMUNE SYSTEM |
| PSMB1    | 1  | 1.16E+02 | 0.419 | INNATE IMMUNE SYSTEM |
| PGM2     | 7  | 6.37E+03 | 0.419 | INNATE IMMUNE SYSTEM |
| CPN1     | 1  | 5.03E+02 | 0.420 | INNATE IMMUNE SYSTEM |
| C4BPB    | 1  | 2.15E+02 | 0.421 | INNATE IMMUNE SYSTEM |

|          |    |          |       |                      |
|----------|----|----------|-------|----------------------|
| IFNA5    | 2  | 2.05E+03 | 0.423 | INNATE IMMUNE SYSTEM |
| SYK      | 1  | 2.60E+02 | 0.423 | INNATE IMMUNE SYSTEM |
| TXN      | 1  | 6.38E+02 | 0.423 | INNATE IMMUNE SYSTEM |
| CEACAM6  | 7  | 4.46E+03 | 0.425 | INNATE IMMUNE SYSTEM |
| GZMM     | 7  | 6.41E+03 | 0.427 | INNATE IMMUNE SYSTEM |
| RBSN     | 5  | 4.24E+03 | 0.427 | INNATE IMMUNE SYSTEM |
| CYFIP2   | 8  | 7.94E+03 | 0.427 | INNATE IMMUNE SYSTEM |
| DDX41    | 1  | 2.28E+02 | 0.428 | INNATE IMMUNE SYSTEM |
| SLC2A3   | 2  | 1.07E+03 | 0.430 | INNATE IMMUNE SYSTEM |
| NCF4     | 7  | 3.52E+03 | 0.432 | INNATE IMMUNE SYSTEM |
| SLC15A4  | 3  | 3.13E+03 | 0.432 | INNATE IMMUNE SYSTEM |
| ADA2     | 5  | 4.39E+03 | 0.432 | INNATE IMMUNE SYSTEM |
| SURF4    | 1  | 1.29E+02 | 0.432 | INNATE IMMUNE SYSTEM |
| PSMB8    | 4  | 5.06E+03 | 0.432 | INNATE IMMUNE SYSTEM |
| TLR5     | 7  | 3.74E+04 | 0.433 | INNATE IMMUNE SYSTEM |
| CD177    | 12 | 1.10E+04 | 0.436 | INNATE IMMUNE SYSTEM |
| DEFB1    | 3  | 8.11E+02 | 0.437 | INNATE IMMUNE SYSTEM |
| ADGRE5   | 16 | 1.21E+04 | 0.437 | INNATE IMMUNE SYSTEM |
| C3AR1    | 2  | 3.22E+03 | 0.439 | INNATE IMMUNE SYSTEM |
| PTPRN2   | 17 | 2.07E+04 | 0.439 | INNATE IMMUNE SYSTEM |
| GSN      | 14 | 1.59E+04 | 0.440 | INNATE IMMUNE SYSTEM |
| CRISP3   | 3  | 6.83E+02 | 0.440 | INNATE IMMUNE SYSTEM |
| PGM1     | 6  | 1.86E+03 | 0.441 | INNATE IMMUNE SYSTEM |
| WASF2    | 4  | 4.25E+03 | 0.441 | INNATE IMMUNE SYSTEM |
| LRMP     | 3  | 5.48E+02 | 0.443 | INNATE IMMUNE SYSTEM |
| PLD4     | 4  | 1.23E+03 | 0.445 | INNATE IMMUNE SYSTEM |
| C8G      | 4  | 2.08E+03 | 0.446 | INNATE IMMUNE SYSTEM |
| PSMA6    | 1  | 3.60E+02 | 0.447 | INNATE IMMUNE SYSTEM |
| SERPINB3 | 9  | 1.73E+04 | 0.448 | INNATE IMMUNE SYSTEM |
| GAA      | 10 | 9.46E+03 | 0.449 | INNATE IMMUNE SYSTEM |
| KLRD1    | 1  | 1.85E+02 | 0.450 | INNATE IMMUNE SYSTEM |
| CPNE3    | 5  | 4.76E+03 | 0.451 | INNATE IMMUNE SYSTEM |
| ICAM3    | 7  | 3.02E+03 | 0.453 | INNATE IMMUNE SYSTEM |
| CPN2     | 9  | 4.83E+03 | 0.454 | INNATE IMMUNE SYSTEM |
| CFHR1    | 1  | 9.01E+01 | 0.455 | INNATE IMMUNE SYSTEM |
| IDH1     | 3  | 3.33E+03 | 0.458 | INNATE IMMUNE SYSTEM |
| HLA-A    | 11 | 1.78E+04 | 0.458 | INNATE IMMUNE SYSTEM |
| CLEC10A  | 7  | 9.98E+03 | 0.458 | INNATE IMMUNE SYSTEM |
| MMP25    | 9  | 7.15E+03 | 0.460 | INNATE IMMUNE SYSTEM |
| TNFAIP6  | 3  | 4.65E+03 | 0.461 | INNATE IMMUNE SYSTEM |
| PROS1    | 8  | 5.86E+03 | 0.462 | INNATE IMMUNE SYSTEM |
| PRKCQ    | 5  | 1.70E+03 | 0.464 | INNATE IMMUNE SYSTEM |
| PSMD5    | 6  | 6.49E+03 | 0.464 | INNATE IMMUNE SYSTEM |
| CLU      | 6  | 3.72E+03 | 0.464 | INNATE IMMUNE SYSTEM |
| SIGLEC14 | 3  | 1.52E+03 | 0.465 | INNATE IMMUNE SYSTEM |
| CTSH     | 6  | 4.16E+03 | 0.466 | INNATE IMMUNE SYSTEM |
| RHOF     | 4  | 5.46E+03 | 0.466 | INNATE IMMUNE SYSTEM |
| ATP11A   | 10 | 7.40E+03 | 0.466 | INNATE IMMUNE SYSTEM |
| IFNA1    | 2  | 1.33E+03 | 0.469 | INNATE IMMUNE SYSTEM |
| POLR3A   | 4  | 9.27E+03 | 0.470 | INNATE IMMUNE SYSTEM |
| CD58     | 3  | 2.01E+03 | 0.471 | INNATE IMMUNE SYSTEM |
| BPIFB1   | 11 | 9.61E+03 | 0.474 | INNATE IMMUNE SYSTEM |
| CD93     | 12 | 8.71E+03 | 0.476 | INNATE IMMUNE SYSTEM |
| BPIFB4   | 6  | 6.59E+03 | 0.481 | INNATE IMMUNE SYSTEM |
| POLR3D   | 2  | 8.80E+02 | 0.483 | INNATE IMMUNE SYSTEM |
| MAPK14   | 3  | 9.45E+02 | 0.483 | INNATE IMMUNE SYSTEM |
| SLC44A2  | 8  | 6.58E+03 | 0.486 | INNATE IMMUNE SYSTEM |
| PTX3     | 6  | 3.85E+03 | 0.487 | INNATE IMMUNE SYSTEM |
| HK3      | 20 | 2.46E+04 | 0.489 | INNATE IMMUNE SYSTEM |
| PI3      | 2  | 2.44E+03 | 0.491 | INNATE IMMUNE SYSTEM |
| PSMD7    | 3  | 1.22E+03 | 0.491 | INNATE IMMUNE SYSTEM |
| IFNA6    | 5  | 4.16E+03 | 0.492 | INNATE IMMUNE SYSTEM |
| DTX4     | 3  | 1.02E+03 | 0.494 | INNATE IMMUNE SYSTEM |
| TRIM25   | 8  | 3.12E+03 | 0.494 | INNATE IMMUNE SYSTEM |
| ACPP     | 2  | 3.47E+02 | 0.495 | INNATE IMMUNE SYSTEM |
| DEFB132  | 6  | 8.35E+03 | 0.496 | INNATE IMMUNE SYSTEM |
| PLCG2    | 17 | 2.09E+04 | 0.497 | INNATE IMMUNE SYSTEM |
| ATG12    | 2  | 2.56E+03 | 0.499 | INNATE IMMUNE SYSTEM |
| POLR3H   | 3  | 6.05E+02 | 0.502 | INNATE IMMUNE SYSTEM |
| HSPA8    | 1  | 7.27E+01 | 0.503 | INNATE IMMUNE SYSTEM |
| CKAP4    | 7  | 5.12E+03 | 0.505 | INNATE IMMUNE SYSTEM |
| RNF216   | 4  | 1.09E+03 | 0.506 | INNATE IMMUNE SYSTEM |
| CAPZA2   | 2  | 4.45E+02 | 0.506 | INNATE IMMUNE SYSTEM |
| AGER     | 10 | 9.69E+03 | 0.510 | INNATE IMMUNE SYSTEM |

|                 |     |          |       |                      |
|-----------------|-----|----------|-------|----------------------|
| <i>SFTPA2</i>   | 5   | 3.02E+03 | 0.511 | INNATE IMMUNE SYSTEM |
| <i>MAP3K1</i>   | 8   | 6.80E+03 | 0.511 | INNATE IMMUNE SYSTEM |
| <i>PSMD8</i>    | 3   | 5.62E+02 | 0.512 | INNATE IMMUNE SYSTEM |
| <i>FGA</i>      | 7   | 1.83E+03 | 0.515 | INNATE IMMUNE SYSTEM |
| <i>SERPINB6</i> | 5   | 3.70E+03 | 0.516 | INNATE IMMUNE SYSTEM |
| <i>PIN1</i>     | 2   | 9.30E+02 | 0.516 | INNATE IMMUNE SYSTEM |
| <i>RAB18</i>    | 1   | 1.03E+02 | 0.518 | INNATE IMMUNE SYSTEM |
| <i>LRRFIP1</i>  | 16  | 1.63E+04 | 0.519 | INNATE IMMUNE SYSTEM |
| <i>DNAJC13</i>  | 18  | 2.96E+04 | 0.519 | INNATE IMMUNE SYSTEM |
| <i>VCL</i>      | 6   | 2.59E+03 | 0.520 | INNATE IMMUNE SYSTEM |
| <i>LAIR1</i>    | 5   | 7.60E+03 | 0.521 | INNATE IMMUNE SYSTEM |
| <i>AZU1</i>     | 2   | 7.70E+02 | 0.521 | INNATE IMMUNE SYSTEM |
| <i>ARSA</i>     | 4   | 1.13E+03 | 0.522 | INNATE IMMUNE SYSTEM |
| <i>PSMB10</i>   | 3   | 7.89E+02 | 0.522 | INNATE IMMUNE SYSTEM |
| <i>ANPEP</i>    | 11  | 1.08E+04 | 0.522 | INNATE IMMUNE SYSTEM |
| <i>WASF1</i>    | 3   | 1.39E+03 | 0.522 | INNATE IMMUNE SYSTEM |
| <i>CANT1</i>    | 5   | 5.04E+03 | 0.522 | INNATE IMMUNE SYSTEM |
| <i>RAB31</i>    | 1   | 1.86E+02 | 0.523 | INNATE IMMUNE SYSTEM |
| <i>HLA-B</i>    | 7   | 3.50E+03 | 0.524 | INNATE IMMUNE SYSTEM |
| <i>UBA3</i>     | 1   | 7.33E+01 | 0.526 | INNATE IMMUNE SYSTEM |
| <i>COMMD3</i>   | 2   | 3.24E+03 | 0.526 | INNATE IMMUNE SYSTEM |
| <i>RAB6A</i>    | 1   | 1.01E+03 | 0.529 | INNATE IMMUNE SYSTEM |
| <i>C2</i>       | 8   | 4.83E+03 | 0.530 | INNATE IMMUNE SYSTEM |
| <i>CTSG</i>     | 1   | 1.61E+02 | 0.531 | INNATE IMMUNE SYSTEM |
| <i>FPR2</i>     | 3   | 1.80E+03 | 0.531 | INNATE IMMUNE SYSTEM |
| <i>CCL17</i>    | 2   | 2.70E+02 | 0.531 | INNATE IMMUNE SYSTEM |
| <i>TRPM2</i>    | 29  | 2.10E+04 | 0.532 | INNATE IMMUNE SYSTEM |
| <i>CFI</i>      | 7   | 5.99E+03 | 0.532 | INNATE IMMUNE SYSTEM |
| <i>MNDA</i>     | 5   | 4.33E+03 | 0.534 | INNATE IMMUNE SYSTEM |
| <i>BIN2</i>     | 6   | 6.34E+03 | 0.539 | INNATE IMMUNE SYSTEM |
| <i>PTGES2</i>   | 1   | 1.05E+03 | 0.542 | INNATE IMMUNE SYSTEM |
| <i>MAP2K6</i>   | 1   | 5.90E+01 | 0.544 | INNATE IMMUNE SYSTEM |
| <i>LBP</i>      | 15  | 2.64E+04 | 0.545 | INNATE IMMUNE SYSTEM |
| <i>UNC13D</i>   | 17  | 1.53E+04 | 0.546 | INNATE IMMUNE SYSTEM |
| <i>POLR3E</i>   | 4   | 2.60E+03 | 0.546 | INNATE IMMUNE SYSTEM |
| <i>FCN1</i>     | 6   | 3.99E+03 | 0.547 | INNATE IMMUNE SYSTEM |
| <i>TMC6</i>     | 12  | 5.81E+03 | 0.548 | INNATE IMMUNE SYSTEM |
| <i>ATP6V1H</i>  | 3   | 1.38E+03 | 0.549 | INNATE IMMUNE SYSTEM |
| <i>PSMD9</i>    | 3   | 9.67E+02 | 0.549 | INNATE IMMUNE SYSTEM |
| <i>PELI1</i>    | 1   | 6.37E+01 | 0.549 | INNATE IMMUNE SYSTEM |
| <i>IRF7</i>     | 6   | 2.37E+03 | 0.550 | INNATE IMMUNE SYSTEM |
| <i>UBE2L6</i>   | 1   | 6.07E+01 | 0.557 | INNATE IMMUNE SYSTEM |
| <i>NFKBIA</i>   | 1   | 7.31E+01 | 0.561 | INNATE IMMUNE SYSTEM |
| <i>IFNA17</i>   | 1   | 7.35E+01 | 0.562 | INNATE IMMUNE SYSTEM |
| <i>DNM2</i>     | 4   | 1.37E+03 | 0.562 | INNATE IMMUNE SYSTEM |
| <i>GLIPR1</i>   | 5   | 1.44E+03 | 0.563 | INNATE IMMUNE SYSTEM |
| <i>CFD</i>      | 3   | 2.22E+03 | 0.568 | INNATE IMMUNE SYSTEM |
| <i>MAPK12</i>   | 6   | 3.97E+03 | 0.571 | INNATE IMMUNE SYSTEM |
| <i>MYH9</i>     | 16  | 1.39E+04 | 0.571 | INNATE IMMUNE SYSTEM |
| <i>NOS2</i>     | 11  | 5.18E+03 | 0.574 | INNATE IMMUNE SYSTEM |
| <i>NCSTN</i>    | 5   | 2.13E+03 | 0.575 | INNATE IMMUNE SYSTEM |
| <i>SIGIRR</i>   | 5   | 3.40E+03 | 0.575 | INNATE IMMUNE SYSTEM |
| <i>IFNA14</i>   | 9   | 5.87E+03 | 0.575 | INNATE IMMUNE SYSTEM |
| <i>ATP6V1E1</i> | 1   | 8.36E+01 | 0.576 | INNATE IMMUNE SYSTEM |
| <i>TRIM56</i>   | 13  | 6.04E+03 | 0.576 | INNATE IMMUNE SYSTEM |
| <i>COLEC11</i>  | 4   | 2.30E+03 | 0.576 | INNATE IMMUNE SYSTEM |
| <i>PRKCSH</i>   | 12  | 7.49E+03 | 0.576 | INNATE IMMUNE SYSTEM |
| <i>NCF2</i>     | 9   | 8.45E+03 | 0.577 | INNATE IMMUNE SYSTEM |
| <i>POLR2E</i>   | 3   | 1.34E+03 | 0.577 | INNATE IMMUNE SYSTEM |
| <i>MUC1</i>     | 19  | 1.78E+04 | 0.577 | INNATE IMMUNE SYSTEM |
| <i>PSMC3</i>    | 1   | 3.75E+01 | 0.578 | INNATE IMMUNE SYSTEM |
| <i>DOK3</i>     | 6   | 1.83E+03 | 0.578 | INNATE IMMUNE SYSTEM |
| <i>SLC27A2</i>  | 4   | 9.15E+02 | 0.578 | INNATE IMMUNE SYSTEM |
| <i>CD36</i>     | 6   | 1.30E+03 | 0.580 | INNATE IMMUNE SYSTEM |
| <i>PTPN6</i>    | 5   | 3.25E+03 | 0.580 | INNATE IMMUNE SYSTEM |
| <i>A1BG</i>     | 5   | 2.80E+03 | 0.580 | INNATE IMMUNE SYSTEM |
| <i>WASL</i>     | 2   | 1.79E+02 | 0.582 | INNATE IMMUNE SYSTEM |
| <i>MAP2K4</i>   | 1   | 1.17E+02 | 0.583 | INNATE IMMUNE SYSTEM |
| <i>VAV2</i>     | 10  | 5.39E+03 | 0.583 | INNATE IMMUNE SYSTEM |
| <i>PGLYRP3</i>  | 7   | 1.08E+04 | 0.584 | INNATE IMMUNE SYSTEM |
| <i>MUC12</i>    | 169 | 2.73E+05 | 0.584 | INNATE IMMUNE SYSTEM |
| <i>KRT1</i>     | 4   | 4.11E+03 | 0.585 | INNATE IMMUNE SYSTEM |
| <i>DERA</i>     | 1   | 6.62E+01 | 0.586 | INNATE IMMUNE SYSTEM |
| <i>POLR3B</i>   | 5   | 2.25E+03 | 0.586 | INNATE IMMUNE SYSTEM |

|          |     |          |       |                      |
|----------|-----|----------|-------|----------------------|
| KRAS     | 2   | 3.83E+02 | 0.589 | INNATE IMMUNE SYSTEM |
| DEFB104B | 2   | 5.91E+02 | 0.589 | INNATE IMMUNE SYSTEM |
| DEFB104A | 2   | 5.91E+02 | 0.589 | INNATE IMMUNE SYSTEM |
| IST1     | 7   | 2.89E+03 | 0.591 | INNATE IMMUNE SYSTEM |
| FPR1     | 5   | 2.74E+03 | 0.591 | INNATE IMMUNE SYSTEM |
| HGSNAT   | 5   | 5.87E+03 | 0.592 | INNATE IMMUNE SYSTEM |
| PLPP4    | 2   | 4.52E+02 | 0.592 | INNATE IMMUNE SYSTEM |
| TRAPPC1  | 1   | 1.99E+01 | 0.595 | INNATE IMMUNE SYSTEM |
| NIT2     | 5   | 1.02E+03 | 0.596 | INNATE IMMUNE SYSTEM |
| SAA1     | 6   | 3.52E+03 | 0.597 | INNATE IMMUNE SYSTEM |
| ANO6     | 9   | 4.83E+03 | 0.597 | INNATE IMMUNE SYSTEM |
| STK10    | 10  | 5.13E+03 | 0.598 | INNATE IMMUNE SYSTEM |
| PSMD11   | 1   | 2.60E+01 | 0.598 | INNATE IMMUNE SYSTEM |
| DPP7     | 13  | 1.17E+04 | 0.598 | INNATE IMMUNE SYSTEM |
| SERPINB1 | 2   | 4.42E+02 | 0.599 | INNATE IMMUNE SYSTEM |
| HSP90B1  | 4   | 3.90E+03 | 0.601 | INNATE IMMUNE SYSTEM |
| ALDOC    | 1   | 1.29E+02 | 0.602 | INNATE IMMUNE SYSTEM |
| CASP9    | 8   | 6.15E+03 | 0.602 | INNATE IMMUNE SYSTEM |
| ARSB     | 4   | 2.85E+03 | 0.604 | INNATE IMMUNE SYSTEM |
| IFNA13   | 2   | 5.43E+02 | 0.606 | INNATE IMMUNE SYSTEM |
| C1QB     | 2   | 2.90E+02 | 0.606 | INNATE IMMUNE SYSTEM |
| FRK      | 7   | 5.90E+03 | 0.607 | INNATE IMMUNE SYSTEM |
| BST2     | 2   | 1.76E+02 | 0.609 | INNATE IMMUNE SYSTEM |
| CRP      | 1   | 3.39E+02 | 0.609 | INNATE IMMUNE SYSTEM |
| CLEC4D   | 3   | 4.68E+02 | 0.609 | INNATE IMMUNE SYSTEM |
| EP300    | 8   | 5.82E+03 | 0.612 | INNATE IMMUNE SYSTEM |
| NCK1     | 3   | 2.22E+03 | 0.613 | INNATE IMMUNE SYSTEM |
| VAT1     | 3   | 6.66E+02 | 0.613 | INNATE IMMUNE SYSTEM |
| TNFAIP3  | 10  | 1.95E+03 | 0.614 | INNATE IMMUNE SYSTEM |
| ADAM8    | 20  | 1.34E+04 | 0.615 | INNATE IMMUNE SYSTEM |
| TXNDC5   | 8   | 3.18E+03 | 0.616 | INNATE IMMUNE SYSTEM |
| P2RX7    | 13  | 1.34E+04 | 0.616 | INNATE IMMUNE SYSTEM |
| LCK      | 1   | 1.25E+02 | 0.617 | INNATE IMMUNE SYSTEM |
| CAPN1    | 7   | 2.70E+03 | 0.618 | INNATE IMMUNE SYSTEM |
| ITPR3    | 15  | 4.94E+03 | 0.623 | INNATE IMMUNE SYSTEM |
| RASGRP1  | 2   | 2.64E+02 | 0.624 | INNATE IMMUNE SYSTEM |
| GPR84    | 6   | 2.07E+03 | 0.625 | INNATE IMMUNE SYSTEM |
| BCL10    | 1   | 7.88E+01 | 0.625 | INNATE IMMUNE SYSTEM |
| CTNNB1   | 2   | 4.03E+02 | 0.627 | INNATE IMMUNE SYSTEM |
| PSMB3    | 1   | 5.09E+01 | 0.629 | INNATE IMMUNE SYSTEM |
| RPS6KA5  | 5   | 2.79E+03 | 0.629 | INNATE IMMUNE SYSTEM |
| UBA7     | 11  | 6.11E+03 | 0.630 | INNATE IMMUNE SYSTEM |
| CLEC7A   | 2   | 9.12E+02 | 0.633 | INNATE IMMUNE SYSTEM |
| C4B      | 8   | 2.80E+03 | 0.637 | INNATE IMMUNE SYSTEM |
| CTSC     | 5   | 8.46E+02 | 0.639 | INNATE IMMUNE SYSTEM |
| CD3G     | 3   | 8.87E+02 | 0.640 | INNATE IMMUNE SYSTEM |
| ELMO2    | 1   | 5.01E+01 | 0.643 | INNATE IMMUNE SYSTEM |
| NLRC3    | 26  | 1.75E+04 | 0.644 | INNATE IMMUNE SYSTEM |
| PELI2    | 3   | 2.18E+03 | 0.644 | INNATE IMMUNE SYSTEM |
| JUP      | 9   | 3.23E+03 | 0.644 | INNATE IMMUNE SYSTEM |
| ART1     | 8   | 6.94E+03 | 0.644 | INNATE IMMUNE SYSTEM |
| ORM2     | 7   | 4.57E+03 | 0.645 | INNATE IMMUNE SYSTEM |
| COMMD9   | 3   | 5.13E+02 | 0.646 | INNATE IMMUNE SYSTEM |
| LCP2     | 7   | 5.46E+03 | 0.648 | INNATE IMMUNE SYSTEM |
| SIGLEC5  | 2   | 3.78E+02 | 0.649 | INNATE IMMUNE SYSTEM |
| PYGB     | 8   | 3.12E+03 | 0.649 | INNATE IMMUNE SYSTEM |
| PSME1    | 2   | 1.21E+03 | 0.649 | INNATE IMMUNE SYSTEM |
| APRT     | 2   | 2.17E+02 | 0.649 | INNATE IMMUNE SYSTEM |
| CD63     | 1   | 4.79E+01 | 0.652 | INNATE IMMUNE SYSTEM |
| ABCA13   | 73  | 2.08E+05 | 0.660 | INNATE IMMUNE SYSTEM |
| VAPA     | 2   | 1.89E+03 | 0.661 | INNATE IMMUNE SYSTEM |
| FUCA2    | 3   | 1.56E+03 | 0.661 | INNATE IMMUNE SYSTEM |
| PFKL     | 14  | 7.71E+03 | 0.662 | INNATE IMMUNE SYSTEM |
| ARPC3    | 2   | 4.55E+02 | 0.664 | INNATE IMMUNE SYSTEM |
| PELI3    | 3   | 1.37E+03 | 0.665 | INNATE IMMUNE SYSTEM |
| CTSB     | 8   | 1.92E+03 | 0.666 | INNATE IMMUNE SYSTEM |
| KIR2DS5  | 112 | 1.05E+05 | 0.668 | INNATE IMMUNE SYSTEM |
| DEFB126  | 3   | 2.15E+03 | 0.669 | INNATE IMMUNE SYSTEM |
| LILRB3   | 18  | 1.24E+04 | 0.672 | INNATE IMMUNE SYSTEM |
| PLA2G2A  | 2   | 1.14E+03 | 0.672 | INNATE IMMUNE SYSTEM |
| PSMD1    | 6   | 1.26E+03 | 0.674 | INNATE IMMUNE SYSTEM |
| IQGAP2   | 18  | 1.16E+04 | 0.675 | INNATE IMMUNE SYSTEM |
| TAB2     | 2   | 5.46E+02 | 0.676 | INNATE IMMUNE SYSTEM |
| GALNS    | 9   | 3.88E+03 | 0.677 | INNATE IMMUNE SYSTEM |

|           |    |          |       |                      |
|-----------|----|----------|-------|----------------------|
| DSG1      | 14 | 9.70E+03 | 0.680 | INNATE IMMUNE SYSTEM |
| CALML5    | 2  | 7.99E+02 | 0.680 | INNATE IMMUNE SYSTEM |
| CTSV      | 1  | 4.52E+01 | 0.680 | INNATE IMMUNE SYSTEM |
| CREB1     | 1  | 5.55E+01 | 0.681 | INNATE IMMUNE SYSTEM |
| CTSD      | 2  | 6.73E+02 | 0.681 | INNATE IMMUNE SYSTEM |
| FGR       | 2  | 2.04E+02 | 0.681 | INNATE IMMUNE SYSTEM |
| TREX1     | 2  | 7.38E+02 | 0.683 | INNATE IMMUNE SYSTEM |
| MLEC      | 1  | 3.56E+01 | 0.683 | INNATE IMMUNE SYSTEM |
| VAV1      | 3  | 1.50E+03 | 0.684 | INNATE IMMUNE SYSTEM |
| C8B       | 7  | 5.19E+03 | 0.686 | INNATE IMMUNE SYSTEM |
| CASP2     | 1  | 2.96E+01 | 0.689 | INNATE IMMUNE SYSTEM |
| ORM1      | 8  | 3.97E+03 | 0.690 | INNATE IMMUNE SYSTEM |
| CEP290    | 27 | 1.14E+04 | 0.692 | INNATE IMMUNE SYSTEM |
| AGA       | 6  | 5.47E+03 | 0.692 | INNATE IMMUNE SYSTEM |
| S100A7A   | 4  | 3.78E+02 | 0.693 | INNATE IMMUNE SYSTEM |
| C3        | 10 | 2.84E+03 | 0.694 | INNATE IMMUNE SYSTEM |
| ARHGAP45  | 11 | 2.55E+03 | 0.694 | INNATE IMMUNE SYSTEM |
| SIKE1     | 1  | 6.89E+01 | 0.694 | INNATE IMMUNE SYSTEM |
| PLAU      | 6  | 6.50E+03 | 0.694 | INNATE IMMUNE SYSTEM |
| MAP3K7    | 2  | 2.71E+02 | 0.694 | INNATE IMMUNE SYSTEM |
| XRCC5     | 3  | 8.49E+02 | 0.697 | INNATE IMMUNE SYSTEM |
| BPIFB2    | 9  | 2.92E+03 | 0.697 | INNATE IMMUNE SYSTEM |
| PLD3      | 9  | 2.40E+03 | 0.697 | INNATE IMMUNE SYSTEM |
| TBC1D10C  | 9  | 5.89E+03 | 0.699 | INNATE IMMUNE SYSTEM |
| PPP2R1B   | 5  | 2.89E+03 | 0.702 | INNATE IMMUNE SYSTEM |
| DIAPH1    | 8  | 2.98E+03 | 0.704 | INNATE IMMUNE SYSTEM |
| PIGR      | 13 | 4.54E+03 | 0.706 | INNATE IMMUNE SYSTEM |
| ATP6VOA2  | 7  | 5.59E+03 | 0.706 | INNATE IMMUNE SYSTEM |
| CAPZA1    | 4  | 2.33E+03 | 0.706 | INNATE IMMUNE SYSTEM |
| MAPKAPK2  | 3  | 2.53E+03 | 0.708 | INNATE IMMUNE SYSTEM |
| MPO       | 14 | 1.47E+04 | 0.710 | INNATE IMMUNE SYSTEM |
| ABI2      | 6  | 1.36E+03 | 0.711 | INNATE IMMUNE SYSTEM |
| HSPA6     | 9  | 2.23E+03 | 0.714 | INNATE IMMUNE SYSTEM |
| FGB       | 5  | 1.47E+03 | 0.715 | INNATE IMMUNE SYSTEM |
| CASP1     | 6  | 2.39E+03 | 0.716 | INNATE IMMUNE SYSTEM |
| STK11IP   | 15 | 8.80E+03 | 0.717 | INNATE IMMUNE SYSTEM |
| CTSA      | 3  | 6.21E+02 | 0.717 | INNATE IMMUNE SYSTEM |
| GDI2      | 1  | 2.56E+01 | 0.718 | INNATE IMMUNE SYSTEM |
| BCL2      | 1  | 3.01E+01 | 0.719 | INNATE IMMUNE SYSTEM |
| TOM1      | 5  | 1.19E+03 | 0.720 | INNATE IMMUNE SYSTEM |
| ATP6V1A   | 1  | 2.04E+01 | 0.722 | INNATE IMMUNE SYSTEM |
| TREM1     | 3  | 2.44E+02 | 0.722 | INNATE IMMUNE SYSTEM |
| CXCR2     | 5  | 9.70E+02 | 0.723 | INNATE IMMUNE SYSTEM |
| SVIP      | 2  | 1.08E+02 | 0.723 | INNATE IMMUNE SYSTEM |
| PSME4     | 9  | 2.12E+03 | 0.724 | INNATE IMMUNE SYSTEM |
| TTR       | 1  | 1.45E+02 | 0.724 | INNATE IMMUNE SYSTEM |
| SUGT1     | 2  | 4.95E+02 | 0.724 | INNATE IMMUNE SYSTEM |
| VAV3      | 11 | 3.52E+03 | 0.728 | INNATE IMMUNE SYSTEM |
| DUSP6     | 2  | 3.34E+02 | 0.728 | INNATE IMMUNE SYSTEM |
| ARPC1B    | 4  | 9.56E+02 | 0.729 | INNATE IMMUNE SYSTEM |
| BPIFB6    | 5  | 3.21E+03 | 0.732 | INNATE IMMUNE SYSTEM |
| SERPINB10 | 7  | 5.53E+03 | 0.735 | INNATE IMMUNE SYSTEM |
| ATP6V1B2  | 2  | 8.54E+02 | 0.736 | INNATE IMMUNE SYSTEM |
| SERPINA1  | 11 | 4.48E+03 | 0.737 | INNATE IMMUNE SYSTEM |
| ATAD3B    | 22 | 2.81E+04 | 0.739 | INNATE IMMUNE SYSTEM |
| PRKACG    | 1  | 3.70E+01 | 0.742 | INNATE IMMUNE SYSTEM |
| NFKB1     | 5  | 1.50E+03 | 0.747 | INNATE IMMUNE SYSTEM |
| CD300A    | 2  | 2.19E+02 | 0.747 | INNATE IMMUNE SYSTEM |
| HBB       | 1  | 1.02E+02 | 0.747 | INNATE IMMUNE SYSTEM |
| PPP2R1A   | 1  | 1.55E+02 | 0.748 | INNATE IMMUNE SYSTEM |
| PADI2     | 7  | 4.22E+03 | 0.749 | INNATE IMMUNE SYSTEM |
| TMEM173   | 1  | 8.95E+01 | 0.750 | INNATE IMMUNE SYSTEM |
| LPCAT1    | 3  | 4.24E+02 | 0.752 | INNATE IMMUNE SYSTEM |
| S100A7    | 3  | 1.00E+03 | 0.752 | INNATE IMMUNE SYSTEM |
| RASGRP2   | 4  | 6.70E+02 | 0.753 | INNATE IMMUNE SYSTEM |
| BCL2L1    | 2  | 1.12E+02 | 0.753 | INNATE IMMUNE SYSTEM |
| DCD       | 1  | 2.36E+02 | 0.754 | INNATE IMMUNE SYSTEM |
| ECSIT     | 4  | 4.61E+02 | 0.755 | INNATE IMMUNE SYSTEM |
| PLPP5     | 4  | 4.38E+02 | 0.756 | INNATE IMMUNE SYSTEM |
| CFHR3     | 2  | 2.45E+02 | 0.757 | INNATE IMMUNE SYSTEM |
| PSMD6     | 5  | 5.04E+02 | 0.757 | INNATE IMMUNE SYSTEM |
| CHRNA4    | 6  | 2.86E+03 | 0.758 | INNATE IMMUNE SYSTEM |
| RIPK2     | 1  | 3.60E+01 | 0.760 | INNATE IMMUNE SYSTEM |
| PSMD13    | 3  | 1.26E+03 | 0.761 | INNATE IMMUNE SYSTEM |

|          |    |          |       |                      |
|----------|----|----------|-------|----------------------|
| CR1      | 23 | 1.07E+04 | 0.761 | INNATE IMMUNE SYSTEM |
| DYNC1H1  | 7  | 1.68E+03 | 0.763 | INNATE IMMUNE SYSTEM |
| CFH      | 10 | 4.46E+03 | 0.765 | INNATE IMMUNE SYSTEM |
| FCGR3A   | 4  | 4.13E+03 | 0.765 | INNATE IMMUNE SYSTEM |
| DEFB125  | 3  | 1.06E+03 | 0.765 | INNATE IMMUNE SYSTEM |
| SHC1     | 3  | 1.24E+03 | 0.765 | INNATE IMMUNE SYSTEM |
| AGPAT2   | 4  | 6.49E+02 | 0.766 | INNATE IMMUNE SYSTEM |
| STAT6    | 4  | 5.96E+02 | 0.767 | INNATE IMMUNE SYSTEM |
| ACAA1    | 4  | 1.07E+03 | 0.769 | INNATE IMMUNE SYSTEM |
| CCL22    | 2  | 1.53E+03 | 0.771 | INNATE IMMUNE SYSTEM |
| SIGLEC9  | 9  | 5.60E+03 | 0.771 | INNATE IMMUNE SYSTEM |
| TARM1    | 3  | 1.52E+03 | 0.771 | INNATE IMMUNE SYSTEM |
| PDPK1    | 1  | 2.60E+01 | 0.773 | INNATE IMMUNE SYSTEM |
| AGL      | 19 | 8.98E+03 | 0.773 | INNATE IMMUNE SYSTEM |
| REG3G    | 5  | 1.53E+03 | 0.774 | INNATE IMMUNE SYSTEM |
| SELL     | 2  | 9.28E+02 | 0.776 | INNATE IMMUNE SYSTEM |
| CTSL     | 1  | 1.89E+02 | 0.776 | INNATE IMMUNE SYSTEM |
| CCT8     | 4  | 2.84E+03 | 0.777 | INNATE IMMUNE SYSTEM |
| ORMDL3   | 1  | 2.84E+01 | 0.778 | INNATE IMMUNE SYSTEM |
| PRKACA   | 4  | 1.16E+03 | 0.781 | INNATE IMMUNE SYSTEM |
| MMP9     | 17 | 7.94E+03 | 0.782 | INNATE IMMUNE SYSTEM |
| NFATC3   | 3  | 1.58E+02 | 0.783 | INNATE IMMUNE SYSTEM |
| DOCK2    | 12 | 7.40E+03 | 0.783 | INNATE IMMUNE SYSTEM |
| BIRC3    | 3  | 8.71E+02 | 0.785 | INNATE IMMUNE SYSTEM |
| DEFB136  | 1  | 1.70E+01 | 0.788 | INNATE IMMUNE SYSTEM |
| ARHGAP9  | 7  | 3.75E+03 | 0.788 | INNATE IMMUNE SYSTEM |
| GUSB     | 3  | 6.23E+02 | 0.789 | INNATE IMMUNE SYSTEM |
| ATP6V1F  | 3  | 1.18E+03 | 0.789 | INNATE IMMUNE SYSTEM |
| TLR9     | 6  | 6.29E+02 | 0.794 | INNATE IMMUNE SYSTEM |
| DUSP4    | 1  | 8.74E+01 | 0.796 | INNATE IMMUNE SYSTEM |
| C9       | 12 | 2.46E+03 | 0.797 | INNATE IMMUNE SYSTEM |
| VTN      | 6  | 2.11E+03 | 0.797 | INNATE IMMUNE SYSTEM |
| LAMP1    | 5  | 1.07E+03 | 0.798 | INNATE IMMUNE SYSTEM |
| CFHR2    | 5  | 2.94E+03 | 0.800 | INNATE IMMUNE SYSTEM |
| PTPRC    | 14 | 9.93E+03 | 0.807 | INNATE IMMUNE SYSTEM |
| PSTPIP1  | 7  | 7.69E+02 | 0.807 | INNATE IMMUNE SYSTEM |
| TRAF3    | 5  | 1.43E+03 | 0.807 | INNATE IMMUNE SYSTEM |
| ALDOA    | 5  | 1.17E+03 | 0.809 | INNATE IMMUNE SYSTEM |
| IRAK2    | 9  | 6.91E+03 | 0.810 | INNATE IMMUNE SYSTEM |
| RAF1     | 3  | 1.61E+02 | 0.811 | INNATE IMMUNE SYSTEM |
| NLRX1    | 16 | 8.03E+03 | 0.811 | INNATE IMMUNE SYSTEM |
| MYO1C    | 20 | 4.63E+03 | 0.813 | INNATE IMMUNE SYSTEM |
| MAPK13   | 3  | 9.28E+02 | 0.813 | INNATE IMMUNE SYSTEM |
| AMPD3    | 10 | 4.52E+03 | 0.814 | INNATE IMMUNE SYSTEM |
| MS4A3    | 3  | 1.87E+02 | 0.814 | INNATE IMMUNE SYSTEM |
| C4BPA    | 4  | 3.19E+03 | 0.815 | INNATE IMMUNE SYSTEM |
| POLR3G   | 2  | 1.16E+02 | 0.816 | INNATE IMMUNE SYSTEM |
| DDOST    | 5  | 1.20E+03 | 0.818 | INNATE IMMUNE SYSTEM |
| ARL8A    | 2  | 1.22E+02 | 0.819 | INNATE IMMUNE SYSTEM |
| ACTR1B   | 2  | 6.12E+02 | 0.820 | INNATE IMMUNE SYSTEM |
| NFKB2    | 8  | 1.88E+03 | 0.825 | INNATE IMMUNE SYSTEM |
| FGG      | 5  | 8.31E+02 | 0.825 | INNATE IMMUNE SYSTEM |
| ATP6V1D  | 2  | 3.12E+02 | 0.825 | INNATE IMMUNE SYSTEM |
| ERP44    | 1  | 7.17E+01 | 0.825 | INNATE IMMUNE SYSTEM |
| HRNR     | 93 | 2.92E+04 | 0.825 | INNATE IMMUNE SYSTEM |
| RAB5C    | 3  | 5.58E+02 | 0.825 | INNATE IMMUNE SYSTEM |
| RETN     | 1  | 1.72E+01 | 0.826 | INNATE IMMUNE SYSTEM |
| ARPC1A   | 1  | 1.37E+01 | 0.831 | INNATE IMMUNE SYSTEM |
| GHDC     | 6  | 2.11E+03 | 0.832 | INNATE IMMUNE SYSTEM |
| DGAT1    | 4  | 2.10E+03 | 0.835 | INNATE IMMUNE SYSTEM |
| KLRC2    | 2  | 2.16E+02 | 0.835 | INNATE IMMUNE SYSTEM |
| ATP6V1B1 | 6  | 8.93E+02 | 0.835 | INNATE IMMUNE SYSTEM |
| TOLLIP   | 4  | 1.77E+02 | 0.837 | INNATE IMMUNE SYSTEM |
| DEFB113  | 1  | 8.42E+00 | 0.838 | INNATE IMMUNE SYSTEM |
| TICAM1   | 13 | 1.50E+03 | 0.839 | INNATE IMMUNE SYSTEM |
| OSTF1    | 3  | 1.24E+02 | 0.840 | INNATE IMMUNE SYSTEM |
| CHGA     | 5  | 5.72E+03 | 0.841 | INNATE IMMUNE SYSTEM |
| S100A9   | 1  | 7.66E+00 | 0.842 | INNATE IMMUNE SYSTEM |
| MAPK11   | 1  | 1.55E+02 | 0.842 | INNATE IMMUNE SYSTEM |
| RIPK1    | 3  | 3.52E+02 | 0.843 | INNATE IMMUNE SYSTEM |
| PSME3    | 1  | 7.83E+00 | 0.846 | INNATE IMMUNE SYSTEM |
| PSMD2    | 2  | 1.22E+02 | 0.847 | INNATE IMMUNE SYSTEM |
| TLR4     | 9  | 4.02E+03 | 0.849 | INNATE IMMUNE SYSTEM |
| CD46     | 3  | 4.23E+02 | 0.849 | INNATE IMMUNE SYSTEM |

|                 |    |          |       |                      |
|-----------------|----|----------|-------|----------------------|
| <i>ALOX5</i>    | 4  | 4.61E+02 | 0.850 | INNATE IMMUNE SYSTEM |
| <i>ABL1</i>     | 7  | 5.15E+03 | 0.851 | INNATE IMMUNE SYSTEM |
| <i>RPS6KA2</i>  | 3  | 6.28E+02 | 0.851 | INNATE IMMUNE SYSTEM |
| <i>BPIFA2</i>   | 6  | 1.13E+03 | 0.854 | INNATE IMMUNE SYSTEM |
| <i>S100A8</i>   | 5  | 6.91E+02 | 0.859 | INNATE IMMUNE SYSTEM |
| <i>DYNLT1</i>   | 1  | 1.00E+01 | 0.860 | INNATE IMMUNE SYSTEM |
| <i>PSMC1</i>    | 1  | 4.42E+00 | 0.860 | INNATE IMMUNE SYSTEM |
| <i>C7</i>       | 8  | 3.07E+03 | 0.860 | INNATE IMMUNE SYSTEM |
| <i>HCK</i>      | 4  | 6.33E+02 | 0.863 | INNATE IMMUNE SYSTEM |
| <i>IKBKE</i>    | 6  | 3.17E+03 | 0.868 | INNATE IMMUNE SYSTEM |
| <i>ITGAL</i>    | 4  | 5.63E+02 | 0.869 | INNATE IMMUNE SYSTEM |
| <i>ISG15</i>    | 1  | 5.03E+00 | 0.870 | INNATE IMMUNE SYSTEM |
| <i>MASP1</i>    | 9  | 1.41E+03 | 0.870 | INNATE IMMUNE SYSTEM |
| <i>NLRP4</i>    | 9  | 1.46E+03 | 0.872 | INNATE IMMUNE SYSTEM |
| <i>C1QC</i>     | 3  | 1.63E+02 | 0.872 | INNATE IMMUNE SYSTEM |
| <i>HSP90AA1</i> | 4  | 3.16E+02 | 0.872 | INNATE IMMUNE SYSTEM |
| <i>GCA</i>      | 2  | 1.33E+03 | 0.873 | INNATE IMMUNE SYSTEM |
| <i>ATG7</i>     | 6  | 1.06E+03 | 0.873 | INNATE IMMUNE SYSTEM |
| <i>NFAM1</i>    | 2  | 9.22E+01 | 0.878 | INNATE IMMUNE SYSTEM |
| <i>CD19</i>     | 3  | 1.70E+02 | 0.880 | INNATE IMMUNE SYSTEM |
| <i>NHLRC3</i>   | 7  | 1.13E+03 | 0.883 | INNATE IMMUNE SYSTEM |
| <i>MUCL1</i>    | 1  | 6.17E+00 | 0.884 | INNATE IMMUNE SYSTEM |
| <i>PYGL</i>     | 6  | 5.46E+03 | 0.888 | INNATE IMMUNE SYSTEM |
| <i>RAB37</i>    | 13 | 1.37E+03 | 0.892 | INNATE IMMUNE SYSTEM |
| <i>FUCA1</i>    | 4  | 5.41E+02 | 0.896 | INNATE IMMUNE SYSTEM |
| <i>CFHR5</i>    | 11 | 1.62E+03 | 0.896 | INNATE IMMUNE SYSTEM |
| <i>FCN3</i>     | 1  | 1.95E+01 | 0.897 | INNATE IMMUNE SYSTEM |
| <i>ALAD</i>     | 4  | 3.98E+02 | 0.897 | INNATE IMMUNE SYSTEM |
| <i>LTF</i>      | 8  | 5.90E+02 | 0.900 | INNATE IMMUNE SYSTEM |
| <i>PGLYRP2</i>  | 11 | 3.38E+03 | 0.901 | INNATE IMMUNE SYSTEM |
| <i>UNC93B1</i>  | 12 | 9.23E+03 | 0.901 | INNATE IMMUNE SYSTEM |
| <i>MUC7</i>     | 16 | 8.56E+03 | 0.902 | INNATE IMMUNE SYSTEM |
| <i>DEFB110</i>  | 1  | 3.39E+00 | 0.902 | INNATE IMMUNE SYSTEM |
| <i>DSN1</i>     | 1  | 7.33E+00 | 0.904 | INNATE IMMUNE SYSTEM |
| <i>NOS3</i>     | 14 | 1.04E+03 | 0.905 | INNATE IMMUNE SYSTEM |
| <i>CD55</i>     | 5  | 1.70E+02 | 0.906 | INNATE IMMUNE SYSTEM |
| <i>PSMB2</i>    | 1  | 1.34E+01 | 0.906 | INNATE IMMUNE SYSTEM |
| <i>CYSTM1</i>   | 1  | 2.56E+00 | 0.909 | INNATE IMMUNE SYSTEM |
| <i>NKIRAS2</i>  | 1  | 2.12E+00 | 0.909 | INNATE IMMUNE SYSTEM |
| <i>NBEAL2</i>   | 20 | 9.38E+03 | 0.909 | INNATE IMMUNE SYSTEM |
| <i>PTK2</i>     | 4  | 4.36E+02 | 0.910 | INNATE IMMUNE SYSTEM |
| <i>B2M</i>      | 1  | 4.62E+00 | 0.913 | INNATE IMMUNE SYSTEM |
| <i>ITGAX</i>    | 14 | 7.19E+02 | 0.915 | INNATE IMMUNE SYSTEM |
| <i>MAPK9</i>    | 1  | 5.64E+00 | 0.915 | INNATE IMMUNE SYSTEM |
| <i>CARD11</i>   | 10 | 2.89E+02 | 0.922 | INNATE IMMUNE SYSTEM |
| <i>DEFB121</i>  | 1  | 2.65E+00 | 0.924 | INNATE IMMUNE SYSTEM |
| <i>RHOG</i>     | 1  | 1.16E+01 | 0.925 | INNATE IMMUNE SYSTEM |
| <i>CD47</i>     | 1  | 1.34E+00 | 0.929 | INNATE IMMUNE SYSTEM |
| <i>SNAP29</i>   | 1  | 1.05E+01 | 0.942 | INNATE IMMUNE SYSTEM |
| <i>PSMA4</i>    | 1  | 6.70E-01 | 0.947 | INNATE IMMUNE SYSTEM |
| <i>IL1B</i>     | 1  | 7.49E-01 | 0.950 | INNATE IMMUNE SYSTEM |
| <i>CDA</i>      | 1  | 8.52E-01 | 0.955 | INNATE IMMUNE SYSTEM |
| <i>RNASE6</i>   | 1  | 1.08E+00 | 0.962 | INNATE IMMUNE SYSTEM |
| <i>PSME2</i>    | 1  | 6.85E+00 | 0.964 | INNATE IMMUNE SYSTEM |
| <i>FAF2</i>     | 1  | 4.24E-01 | 0.980 | INNATE IMMUNE SYSTEM |
| <i>PIK3CB</i>   | 1  | 9.66E-02 | 0.991 | INNATE IMMUNE SYSTEM |
| <i>IRF3</i>     | 5  | 3.05E+02 | 1     | INNATE IMMUNE SYSTEM |
| <i>AP1M1</i>    | 2  | 4.33E-01 | 1     | INNATE IMMUNE SYSTEM |
| <i>C4A</i>      | 5  | 1.22E+02 | 1     | INNATE IMMUNE SYSTEM |
| <i>NCR2</i>     | 5  | 1.40E+01 | 1     | INNATE IMMUNE SYSTEM |
| <i>C5AR2</i>    | 2  | 3.91E+01 | 1     | INNATE IMMUNE SYSTEM |
| <i>ATP6V0A1</i> | 7  | 9.40E+00 | 1     | INNATE IMMUNE SYSTEM |
| <i>IRAK4</i>    | 3  | 5.17E+01 | 1     | INNATE IMMUNE SYSTEM |
| <i>DEFB131A</i> | 3  | 3.28E+02 | 1     | INNATE IMMUNE SYSTEM |
| <i>ARMC8</i>    | 2  | 2.03E+00 | 1     | INNATE IMMUNE SYSTEM |
| <i>TYROBP</i>   | 3  | 5.55E+01 | 1     | INNATE IMMUNE SYSTEM |
| <i>ATP8B4</i>   | 14 | 7.32E+03 | 1     | INNATE IMMUNE SYSTEM |
| <i>SLC2A5</i>   | 7  | 1.38E+02 | 1     | INNATE IMMUNE SYSTEM |
| <i>ITGB2</i>    | 6  | 1.67E+03 | 1     | INNATE IMMUNE SYSTEM |
| <i>PRSS3</i>    | 13 | 1.72E+03 | 1     | INNATE IMMUNE SYSTEM |
| <i>CD209</i>    | 4  | 2.40E+02 | 1     | INNATE IMMUNE SYSTEM |
| <i>PSMF1</i>    | 7  | 1.61E+03 | 1     | INNATE IMMUNE SYSTEM |
| <i>PTPN11</i>   | 3  | 1.93E+02 | 1     | INNATE IMMUNE SYSTEM |
| <i>GNLY</i>     | 3  | 1.39E+02 | 1     | INNATE IMMUNE SYSTEM |

|          |    |          |   |                      |
|----------|----|----------|---|----------------------|
| PGLYRP4  | 6  | 1.19E+02 | 1 | INNATE IMMUNE SYSTEM |
| SRP14    | 2  | 4.31E+01 | 1 | INNATE IMMUNE SYSTEM |
| NLRC5    | 16 | 9.56E+01 | 1 | INNATE IMMUNE SYSTEM |
| LTA4H    | 4  | 7.41E+02 | 1 | INNATE IMMUNE SYSTEM |
| CAP1     | 3  | 1.23E+02 | 1 | INNATE IMMUNE SYSTEM |
| PGLYRP1  | 3  | 2.96E+01 | 1 | INNATE IMMUNE SYSTEM |
| CPPED1   | 12 | 5.72E+01 | 1 | INNATE IMMUNE SYSTEM |
| GLB1     | 7  | 7.02E+02 | 1 | INNATE IMMUNE SYSTEM |
| HVCN1    | 3  | 2.38E+01 | 1 | INNATE IMMUNE SYSTEM |
| HRAS     | 3  | 3.32E+00 | 1 | INNATE IMMUNE SYSTEM |
| MRE11    | 5  | 5.13E+02 | 1 | INNATE IMMUNE SYSTEM |
| FCGR3B   | 2  | 2.55E+02 | 1 | INNATE IMMUNE SYSTEM |
| CASP8    | 3  | 4.03E+02 | 1 | INNATE IMMUNE SYSTEM |
| MME      | 9  | 2.49E+03 | 1 | INNATE IMMUNE SYSTEM |
| AHSG     | 3  | 1.48E+03 | 1 | INNATE IMMUNE SYSTEM |
| HEBP2    | 8  | 6.39E+02 | 1 | INNATE IMMUNE SYSTEM |
| ADGRE3   | 8  | 4.95E+02 | 1 | INNATE IMMUNE SYSTEM |
| PSMA8    | 4  | 5.16E+00 | 1 | INNATE IMMUNE SYSTEM |
| VRK3     | 9  | 5.39E+02 | 1 | INNATE IMMUNE SYSTEM |
| TIMP2    | 10 | 1.84E+02 | 1 | INNATE IMMUNE SYSTEM |
| PRG3     | 3  | 3.42E+00 | 1 | INNATE IMMUNE SYSTEM |
| C8A      | 9  | 6.37E+02 | 1 | INNATE IMMUNE SYSTEM |
| PANX1    | 2  | 3.35E+01 | 1 | INNATE IMMUNE SYSTEM |
| YES1     | 2  | 1.99E+02 | 1 | INNATE IMMUNE SYSTEM |
| FCGR2A   | 3  | 1.18E+02 | 1 | INNATE IMMUNE SYSTEM |
| TANK     | 6  | 2.98E+03 | 1 | INNATE IMMUNE SYSTEM |
| MEFV     | 13 | 1.09E+04 | 1 | INNATE IMMUNE SYSTEM |
| PSMD3    | 2  | 7.88E+00 | 1 | INNATE IMMUNE SYSTEM |
| FOS      | 5  | 2.75E+02 | 1 | INNATE IMMUNE SYSTEM |
| ELANE    | 3  | 5.41E+01 | 1 | INNATE IMMUNE SYSTEM |
| ATP6V0A4 | 9  | 3.09E+03 | 1 | INNATE IMMUNE SYSTEM |
| GYG1     | 5  | 1.46E+02 | 1 | INNATE IMMUNE SYSTEM |
| PYCARD   | 2  | 2.66E+02 | 1 | INNATE IMMUNE SYSTEM |
| DOCK1    | 20 | 7.33E+02 | 1 | INNATE IMMUNE SYSTEM |
| SARM1    | 6  | 2.75E+03 | 1 | INNATE IMMUNE SYSTEM |
| COPB1    | 6  | 1.14E+02 | 1 | INNATE IMMUNE SYSTEM |
| VNN1     | 6  | 1.12E+02 | 1 | INNATE IMMUNE SYSTEM |
| ITGAM    | 14 | 7.91E+02 | 1 | INNATE IMMUNE SYSTEM |
| MAPK3    | 5  | 2.78E+01 | 1 | INNATE IMMUNE SYSTEM |
| IFNA7    | 6  | 1.32E+03 | 1 | INNATE IMMUNE SYSTEM |
| CD68     | 2  | 4.02E+01 | 1 | INNATE IMMUNE SYSTEM |
| PIK3R4   | 4  | 5.87E+02 | 1 | INNATE IMMUNE SYSTEM |
| TEC      | 2  | 1.07E+01 | 1 | INNATE IMMUNE SYSTEM |
| PTPRJ    | 17 | 4.13E+03 | 1 | INNATE IMMUNE SYSTEM |
| SOCS1    | 2  | 9.38E+01 | 1 | INNATE IMMUNE SYSTEM |
| DEFA4    | 6  | 1.74E+03 | 1 | INNATE IMMUNE SYSTEM |

| Gene     | NumVar | Q        | Pvalue   | Gene-set |
|----------|--------|----------|----------|----------|
| GBA      | 9      | 1.83E+05 | 1.95E-09 | LYSOSOME |
| SORT1    | 10     | 5.19E+04 | 0.033    | LYSOSOME |
| AP3B1    | 6      | 2.86E+04 | 0.041    | LYSOSOME |
| CTNS     | 6      | 1.15E+04 | 0.041    | LYSOSOME |
| SLC17A5  | 5      | 1.63E+04 | 0.054    | LYSOSOME |
| LIPA     | 1      | 3.82E+03 | 0.075    | LYSOSOME |
| MAN2B1   | 13     | 2.40E+04 | 0.077    | LYSOSOME |
| MFSD8    | 5      | 1.95E+04 | 0.086    | LYSOSOME |
| PSAP     | 3      | 3.19E+03 | 0.097    | LYSOSOME |
| CTSW     | 7      | 8.78E+03 | 0.102    | LYSOSOME |
| SUMF1    | 3      | 4.22E+03 | 0.119    | LYSOSOME |
| SMPD1    | 14     | 2.23E+04 | 0.136    | LYSOSOME |
| PPT1     | 2      | 1.76E+03 | 0.142    | LYSOSOME |
| ARSG     | 16     | 3.16E+04 | 0.148    | LYSOSOME |
| ATP6V0D2 | 4      | 2.48E+03 | 0.149    | LYSOSOME |
| ASAH1    | 10     | 1.65E+04 | 0.167    | LYSOSOME |
| HEXB     | 4      | 9.65E+03 | 0.169    | LYSOSOME |
| AP1B1    | 6      | 6.56E+03 | 0.177    | LYSOSOME |
| CLN3     | 4      | 2.76E+03 | 0.221    | LYSOSOME |
| AP4B1    | 4      | 6.62E+03 | 0.229    | LYSOSOME |
| HEXA     | 6      | 7.40E+03 | 0.236    | LYSOSOME |
| SLC11A1  | 11     | 1.91E+04 | 0.244    | LYSOSOME |
| AP3M1    | 2      | 3.39E+03 | 0.245    | LYSOSOME |
| ABCA2    | 16     | 2.67E+04 | 0.266    | LYSOSOME |
| CTSF     | 2      | 3.50E+03 | 0.269    | LYSOSOME |
| DNASE2   | 1      | 3.32E+03 | 0.270    | LYSOSOME |

|          |    |          |       |          |
|----------|----|----------|-------|----------|
| NAPSA    | 4  | 2.00E+03 | 0.276 | LYSOSOME |
| AP3D1    | 6  | 2.29E+03 | 0.282 | LYSOSOME |
| AP1M2    | 4  | 4.05E+03 | 0.283 | LYSOSOME |
| MANBA    | 4  | 6.91E+03 | 0.283 | LYSOSOME |
| AP3B2    | 3  | 1.24E+03 | 0.291 | LYSOSOME |
| PLA2G15  | 4  | 4.12E+03 | 0.293 | LYSOSOME |
| CTSZ     | 3  | 3.74E+03 | 0.331 | LYSOSOME |
| CLTA     | 1  | 3.60E+02 | 0.337 | LYSOSOME |
| GGA3     | 15 | 2.69E+04 | 0.339 | LYSOSOME |
| GM2A     | 3  | 4.62E+03 | 0.343 | LYSOSOME |
| GNS      | 3  | 1.13E+03 | 0.346 | LYSOSOME |
| NPC2     | 4  | 6.14E+03 | 0.348 | LYSOSOME |
| TCIRG1   | 12 | 1.37E+04 | 0.354 | LYSOSOME |
| CTSS     | 1  | 2.34E+02 | 0.384 | LYSOSOME |
| IGF2R    | 28 | 1.97E+04 | 0.387 | LYSOSOME |
| NAGLU    | 4  | 6.07E+03 | 0.390 | LYSOSOME |
| LGMN     | 4  | 6.40E+03 | 0.392 | LYSOSOME |
| ABCB9    | 5  | 6.37E+03 | 0.403 | LYSOSOME |
| GALC     | 5  | 3.68E+03 | 0.404 | LYSOSOME |
| ENTPD4   | 10 | 5.74E+03 | 0.406 | LYSOSOME |
| NAGA     | 8  | 6.03E+03 | 0.444 | LYSOSOME |
| LAPTM4B  | 4  | 2.71E+03 | 0.449 | LYSOSOME |
| GAA      | 10 | 9.46E+03 | 0.449 | LYSOSOME |
| IDUA     | 28 | 2.92E+04 | 0.465 | LYSOSOME |
| ACP2     | 4  | 6.23E+03 | 0.465 | LYSOSOME |
| CTSH     | 6  | 4.16E+03 | 0.466 | LYSOSOME |
| AP4E1    | 4  | 1.62E+03 | 0.467 | LYSOSOME |
| CLTB     | 2  | 5.56E+02 | 0.485 | LYSOSOME |
| ARSA     | 4  | 1.13E+03 | 0.522 | LYSOSOME |
| AP1S3    | 4  | 7.36E+03 | 0.524 | LYSOSOME |
| CTSG     | 1  | 1.61E+02 | 0.531 | LYSOSOME |
| ACP5     | 5  | 3.13E+03 | 0.540 | LYSOSOME |
| GGA2     | 7  | 2.27E+03 | 0.541 | LYSOSOME |
| ATP6V1H  | 3  | 1.38E+03 | 0.549 | LYSOSOME |
| GNPTAB   | 8  | 7.29E+03 | 0.569 | LYSOSOME |
| GNPTG    | 2  | 2.08E+02 | 0.577 | LYSOSOME |
| DNASE2B  | 2  | 9.76E+02 | 0.583 | LYSOSOME |
| HGSNAT   | 5  | 5.87E+03 | 0.592 | LYSOSOME |
| ARSB     | 4  | 2.85E+03 | 0.604 | LYSOSOME |
| NPC1     | 9  | 4.72E+03 | 0.623 | LYSOSOME |
| LAMP3    | 2  | 3.65E+02 | 0.634 | LYSOSOME |
| CTSC     | 5  | 8.46E+02 | 0.639 | LYSOSOME |
| AP4S1    | 5  | 1.77E+03 | 0.649 | LYSOSOME |
| CD63     | 1  | 4.79E+01 | 0.652 | LYSOSOME |
| AP3M2    | 4  | 5.51E+02 | 0.656 | LYSOSOME |
| CTSB     | 8  | 1.92E+03 | 0.666 | LYSOSOME |
| GGA1     | 3  | 1.89E+03 | 0.671 | LYSOSOME |
| GALNS    | 9  | 3.88E+03 | 0.677 | LYSOSOME |
| CTSV     | 1  | 4.52E+01 | 0.680 | LYSOSOME |
| CTSD     | 2  | 6.73E+02 | 0.681 | LYSOSOME |
| LAPTM5   | 4  | 1.66E+03 | 0.690 | LYSOSOME |
| AGA      | 6  | 5.47E+03 | 0.692 | LYSOSOME |
| NAGPA    | 6  | 1.15E+03 | 0.693 | LYSOSOME |
| ATP6V0A2 | 7  | 5.59E+03 | 0.706 | LYSOSOME |
| LAPTM4A  | 2  | 3.84E+02 | 0.714 | LYSOSOME |
| TPP1     | 6  | 1.60E+03 | 0.714 | LYSOSOME |
| CTSA     | 3  | 6.21E+02 | 0.717 | LYSOSOME |
| CLTCL1   | 22 | 2.13E+04 | 0.740 | LYSOSOME |
| CTSL     | 1  | 1.89E+02 | 0.776 | LYSOSOME |
| PSAPL1   | 12 | 6.80E+03 | 0.781 | LYSOSOME |
| GUSB     | 3  | 6.23E+02 | 0.789 | LYSOSOME |
| LAMP1    | 5  | 1.07E+03 | 0.798 | LYSOSOME |
| CTSE     | 9  | 5.51E+03 | 0.808 | LYSOSOME |
| HYAL1    | 2  | 2.59E+02 | 0.842 | LYSOSOME |
| CLN5     | 5  | 8.98E+02 | 0.843 | LYSOSOME |
| SCARB2   | 3  | 4.93E+02 | 0.865 | LYSOSOME |
| PPT2     | 1  | 8.38E+00 | 0.872 | LYSOSOME |
| FUCA1    | 4  | 5.41E+02 | 0.896 | LYSOSOME |
| AP1G1    | 1  | 5.08E-02 | 0.993 | LYSOSOME |
| AP1M1    | 2  | 4.33E-01 | 1     | LYSOSOME |
| CTSO     | 2  | 1.02E+02 | 1     | LYSOSOME |
| ATP6V0A1 | 7  | 9.40E+00 | 1     | LYSOSOME |
| SLC11A2  | 5  | 2.69E+01 | 1     | LYSOSOME |
| SGSH     | 8  | 2.42E+02 | 1     | LYSOSOME |

|                 |   |          |   |          |
|-----------------|---|----------|---|----------|
| <i>GLB1</i>     | 7 | 7.02E+02 | 1 | LYSOSOME |
| <i>CD164</i>    | 2 | 3.60E+00 | 1 | LYSOSOME |
| <i>AP4M1</i>    | 9 | 7.97E+01 | 1 | LYSOSOME |
| <i>ATP6V0A4</i> | 9 | 3.09E+03 | 1 | LYSOSOME |
| <i>MCOLN1</i>   | 5 | 3.10E+01 | 1 | LYSOSOME |
| <i>CD68</i>     | 2 | 4.02E+01 | 1 | LYSOSOME |

| Gene           | NumVar | Q        | Pvalue   | Gene-set                                |
|----------------|--------|----------|----------|-----------------------------------------|
| <i>DRD2</i>    | 13     | 5.66E+06 | 2.15E-10 | NEUROACTIVE LIGAND RECEPTOR INTERACTION |
| <i>GABRA5</i>  | 2      | 8.16E+03 | 0.002    | NEUROACTIVE LIGAND RECEPTOR INTERACTION |
| <i>PRLR</i>    | 7      | 4.00E+04 | 0.004    | NEUROACTIVE LIGAND RECEPTOR INTERACTION |
| <i>C5AR1</i>   | 7      | 4.11E+04 | 0.018    | NEUROACTIVE LIGAND RECEPTOR INTERACTION |
| <i>ADRA1D</i>  | 8      | 4.79E+04 | 0.019    | NEUROACTIVE LIGAND RECEPTOR INTERACTION |
| <i>SSTR4</i>   | 6      | 1.98E+04 | 0.026    | NEUROACTIVE LIGAND RECEPTOR INTERACTION |
| <i>CHRNA5</i>  | 5      | 2.11E+04 | 0.028    | NEUROACTIVE LIGAND RECEPTOR INTERACTION |
| <i>GABRB2</i>  | 1      | 3.28E+03 | 0.028    | NEUROACTIVE LIGAND RECEPTOR INTERACTION |
| <i>MC4R</i>    | 5      | 4.32E+04 | 0.034    | NEUROACTIVE LIGAND RECEPTOR INTERACTION |
| <i>NMBR</i>    | 7      | 3.42E+04 | 0.037    | NEUROACTIVE LIGAND RECEPTOR INTERACTION |
| <i>MLNR</i>    | 1      | 1.22E+04 | 0.042    | NEUROACTIVE LIGAND RECEPTOR INTERACTION |
| <i>F2</i>      | 5      | 7.45E+03 | 0.047    | NEUROACTIVE LIGAND RECEPTOR INTERACTION |
| <i>LEP</i>     | 1      | 1.02E+03 | 0.048    | NEUROACTIVE LIGAND RECEPTOR INTERACTION |
| <i>APLNR</i>   | 4      | 6.90E+03 | 0.065    | NEUROACTIVE LIGAND RECEPTOR INTERACTION |
| <i>P2RY6</i>   | 4      | 5.25E+03 | 0.068    | NEUROACTIVE LIGAND RECEPTOR INTERACTION |
| <i>NPBWR1</i>  | 3      | 5.56E+03 | 0.083    | NEUROACTIVE LIGAND RECEPTOR INTERACTION |
| <i>TAAR9</i>   | 5      | 8.59E+03 | 0.085    | NEUROACTIVE LIGAND RECEPTOR INTERACTION |
| <i>GRIA2</i>   | 1      | 1.09E+03 | 0.087    | NEUROACTIVE LIGAND RECEPTOR INTERACTION |
| <i>GHRHR</i>   | 2      | 1.23E+04 | 0.088    | NEUROACTIVE LIGAND RECEPTOR INTERACTION |
| <i>GLRB</i>    | 1      | 6.41E+02 | 0.089    | NEUROACTIVE LIGAND RECEPTOR INTERACTION |
| <i>ADRB1</i>   | 1      | 1.27E+03 | 0.110    | NEUROACTIVE LIGAND RECEPTOR INTERACTION |
| <i>PTH1R</i>   | 4      | 2.07E+04 | 0.116    | NEUROACTIVE LIGAND RECEPTOR INTERACTION |
| <i>GIPR</i>    | 9      | 1.08E+04 | 0.116    | NEUROACTIVE LIGAND RECEPTOR INTERACTION |
| <i>F2RL1</i>   | 4      | 1.12E+04 | 0.121    | NEUROACTIVE LIGAND RECEPTOR INTERACTION |
| <i>HTR5A</i>   | 1      | 9.91E+02 | 0.126    | NEUROACTIVE LIGAND RECEPTOR INTERACTION |
| <i>CNR1</i>    | 1      | 5.34E+02 | 0.126    | NEUROACTIVE LIGAND RECEPTOR INTERACTION |
| <i>GH1</i>     | 2      | 1.58E+04 | 0.129    | NEUROACTIVE LIGAND RECEPTOR INTERACTION |
| <i>TBXA2R</i>  | 12     | 2.12E+04 | 0.133    | NEUROACTIVE LIGAND RECEPTOR INTERACTION |
| <i>PRL</i>     | 2      | 1.18E+03 | 0.138    | NEUROACTIVE LIGAND RECEPTOR INTERACTION |
| <i>ADRB2</i>   | 2      | 8.42E+03 | 0.146    | NEUROACTIVE LIGAND RECEPTOR INTERACTION |
| <i>HTR1A</i>   | 3      | 1.64E+04 | 0.147    | NEUROACTIVE LIGAND RECEPTOR INTERACTION |
| <i>CHRM2</i>   | 3      | 8.45E+03 | 0.148    | NEUROACTIVE LIGAND RECEPTOR INTERACTION |
| <i>CHRNA4</i>  | 10     | 8.29E+03 | 0.150    | NEUROACTIVE LIGAND RECEPTOR INTERACTION |
| <i>PTGFR</i>   | 6      | 1.78E+04 | 0.150    | NEUROACTIVE LIGAND RECEPTOR INTERACTION |
| <i>S1PR2</i>   | 4      | 1.54E+04 | 0.156    | NEUROACTIVE LIGAND RECEPTOR INTERACTION |
| <i>GABRR2</i>  | 9      | 1.94E+04 | 0.160    | NEUROACTIVE LIGAND RECEPTOR INTERACTION |
| <i>PTGDR</i>   | 6      | 1.47E+04 | 0.161    | NEUROACTIVE LIGAND RECEPTOR INTERACTION |
| <i>P2RX1</i>   | 2      | 1.55E+03 | 0.162    | NEUROACTIVE LIGAND RECEPTOR INTERACTION |
| <i>CHRNA3</i>  | 5      | 5.17E+03 | 0.168    | NEUROACTIVE LIGAND RECEPTOR INTERACTION |
| <i>HTR2B</i>   | 1      | 2.85E+02 | 0.171    | NEUROACTIVE LIGAND RECEPTOR INTERACTION |
| <i>GRIA4</i>   | 2      | 1.03E+03 | 0.177    | NEUROACTIVE LIGAND RECEPTOR INTERACTION |
| <i>GCGR</i>    | 6      | 1.09E+04 | 0.184    | NEUROACTIVE LIGAND RECEPTOR INTERACTION |
| <i>CHRNA2</i>  | 4      | 6.64E+03 | 0.191    | NEUROACTIVE LIGAND RECEPTOR INTERACTION |
| <i>HTR1B</i>   | 1      | 6.22E+03 | 0.191    | NEUROACTIVE LIGAND RECEPTOR INTERACTION |
| <i>GRM7</i>    | 1      | 4.46E+02 | 0.193    | NEUROACTIVE LIGAND RECEPTOR INTERACTION |
| <i>GPR83</i>   | 3      | 2.96E+03 | 0.197    | NEUROACTIVE LIGAND RECEPTOR INTERACTION |
| <i>GABRB1</i>  | 2      | 2.54E+03 | 0.202    | NEUROACTIVE LIGAND RECEPTOR INTERACTION |
| <i>CYSLTR2</i> | 7      | 5.38E+04 | 0.204    | NEUROACTIVE LIGAND RECEPTOR INTERACTION |
| <i>PLG</i>     | 15     | 3.52E+04 | 0.207    | NEUROACTIVE LIGAND RECEPTOR INTERACTION |
| <i>CRHR2</i>   | 11     | 2.24E+04 | 0.214    | NEUROACTIVE LIGAND RECEPTOR INTERACTION |
| <i>GRIK4</i>   | 7      | 8.59E+03 | 0.216    | NEUROACTIVE LIGAND RECEPTOR INTERACTION |
| <i>GABRA4</i>  | 2      | 4.84E+03 | 0.226    | NEUROACTIVE LIGAND RECEPTOR INTERACTION |
| <i>AVPR1B</i>  | 9      | 1.01E+04 | 0.228    | NEUROACTIVE LIGAND RECEPTOR INTERACTION |
| <i>ADRA2A</i>  | 4      | 3.12E+03 | 0.228    | NEUROACTIVE LIGAND RECEPTOR INTERACTION |
| <i>PRSS2</i>   | 15     | 4.17E+04 | 0.232    | NEUROACTIVE LIGAND RECEPTOR INTERACTION |
| <i>GRM6</i>    | 17     | 3.20E+04 | 0.234    | NEUROACTIVE LIGAND RECEPTOR INTERACTION |
| <i>TRPV1</i>   | 12     | 9.79E+03 | 0.242    | NEUROACTIVE LIGAND RECEPTOR INTERACTION |
| <i>NMUR2</i>   | 7      | 1.75E+04 | 0.244    | NEUROACTIVE LIGAND RECEPTOR INTERACTION |
| <i>GALR1</i>   | 4      | 2.03E+03 | 0.250    | NEUROACTIVE LIGAND RECEPTOR INTERACTION |
| <i>PTGER1</i>  | 6      | 6.37E+03 | 0.267    | NEUROACTIVE LIGAND RECEPTOR INTERACTION |
| <i>GABRG1</i>  | 3      | 2.83E+03 | 0.276    | NEUROACTIVE LIGAND RECEPTOR INTERACTION |
| <i>GRIN2D</i>  | 3      | 4.55E+03 | 0.287    | NEUROACTIVE LIGAND RECEPTOR INTERACTION |
| <i>CNR2</i>    | 5      | 6.09E+03 | 0.298    | NEUROACTIVE LIGAND RECEPTOR INTERACTION |
| <i>FSHR</i>    | 5      | 4.26E+03 | 0.301    | NEUROACTIVE LIGAND RECEPTOR INTERACTION |
| <i>S1PR4</i>   | 11     | 1.41E+04 | 0.301    | NEUROACTIVE LIGAND RECEPTOR INTERACTION |
| <i>VIPR2</i>   | 7      | 5.04E+03 | 0.302    | NEUROACTIVE LIGAND RECEPTOR INTERACTION |

|                  |    |          |       |                                         |
|------------------|----|----------|-------|-----------------------------------------|
| <i>HRH3</i>      | 2  | 8.34E+02 | 0.304 | NEUROACTIVE LIGAND RECEPTOR INTERACTION |
| <i>TRHR</i>      | 4  | 2.37E+03 | 0.307 | NEUROACTIVE LIGAND RECEPTOR INTERACTION |
| <i>CHRNE</i>     | 17 | 1.74E+04 | 0.308 | NEUROACTIVE LIGAND RECEPTOR INTERACTION |
| <i>PTGIR</i>     | 4  | 1.04E+04 | 0.308 | NEUROACTIVE LIGAND RECEPTOR INTERACTION |
| <i>MC2R</i>      | 5  | 5.79E+03 | 0.313 | NEUROACTIVE LIGAND RECEPTOR INTERACTION |
| <i>TACR1</i>     | 2  | 9.74E+02 | 0.318 | NEUROACTIVE LIGAND RECEPTOR INTERACTION |
| <i>LTB4R</i>     | 4  | 1.86E+03 | 0.327 | NEUROACTIVE LIGAND RECEPTOR INTERACTION |
| <i>GRM5</i>      | 4  | 1.84E+03 | 0.328 | NEUROACTIVE LIGAND RECEPTOR INTERACTION |
| <i>P2RX5</i>     | 9  | 1.61E+04 | 0.333 | NEUROACTIVE LIGAND RECEPTOR INTERACTION |
| <i>PTAFR</i>     | 3  | 2.22E+03 | 0.341 | NEUROACTIVE LIGAND RECEPTOR INTERACTION |
| <i>NPFFR1</i>    | 8  | 5.71E+03 | 0.347 | NEUROACTIVE LIGAND RECEPTOR INTERACTION |
| <i>HRH2</i>      | 3  | 1.80E+03 | 0.362 | NEUROACTIVE LIGAND RECEPTOR INTERACTION |
| <i>CHRNA10</i>   | 6  | 8.79E+03 | 0.368 | NEUROACTIVE LIGAND RECEPTOR INTERACTION |
| <i>OPRM1</i>     | 16 | 1.52E+04 | 0.374 | NEUROACTIVE LIGAND RECEPTOR INTERACTION |
| <i>DRD5</i>      | 6  | 5.99E+03 | 0.376 | NEUROACTIVE LIGAND RECEPTOR INTERACTION |
| <i>CALCR</i>     | 6  | 4.50E+03 | 0.378 | NEUROACTIVE LIGAND RECEPTOR INTERACTION |
| <i>GRM4</i>      | 2  | 8.27E+02 | 0.380 | NEUROACTIVE LIGAND RECEPTOR INTERACTION |
| <i>GZMA</i>      | 3  | 4.60E+03 | 0.383 | NEUROACTIVE LIGAND RECEPTOR INTERACTION |
| <i>GNRHR</i>     | 5  | 5.57E+03 | 0.387 | NEUROACTIVE LIGAND RECEPTOR INTERACTION |
| <i>TAAR8</i>     | 2  | 1.09E+03 | 0.390 | NEUROACTIVE LIGAND RECEPTOR INTERACTION |
| <i>DRD4</i>      | 25 | 3.81E+04 | 0.398 | NEUROACTIVE LIGAND RECEPTOR INTERACTION |
| <i>GABRP</i>     | 4  | 5.07E+03 | 0.402 | NEUROACTIVE LIGAND RECEPTOR INTERACTION |
| <i>GRIK2</i>     | 3  | 4.87E+03 | 0.419 | NEUROACTIVE LIGAND RECEPTOR INTERACTION |
| <i>PRSS1</i>     | 8  | 3.98E+03 | 0.425 | NEUROACTIVE LIGAND RECEPTOR INTERACTION |
| <i>FSHB</i>      | 3  | 2.34E+03 | 0.432 | NEUROACTIVE LIGAND RECEPTOR INTERACTION |
| <i>TACR2</i>     | 9  | 6.30E+03 | 0.433 | NEUROACTIVE LIGAND RECEPTOR INTERACTION |
| <i>CHRNA9</i>    | 7  | 3.21E+03 | 0.434 | NEUROACTIVE LIGAND RECEPTOR INTERACTION |
| <i>C3AR1</i>     | 2  | 3.22E+03 | 0.439 | NEUROACTIVE LIGAND RECEPTOR INTERACTION |
| <i>CSH1</i>      | 1  | 1.02E+02 | 0.445 | NEUROACTIVE LIGAND RECEPTOR INTERACTION |
| <i>GRIA1</i>     | 2  | 1.90E+03 | 0.459 | NEUROACTIVE LIGAND RECEPTOR INTERACTION |
| <i>PARD3</i>     | 9  | 7.23E+03 | 0.460 | NEUROACTIVE LIGAND RECEPTOR INTERACTION |
| <i>GABBR1</i>    | 3  | 1.77E+03 | 0.462 | NEUROACTIVE LIGAND RECEPTOR INTERACTION |
| <i>GPR156</i>    | 9  | 5.24E+03 | 0.464 | NEUROACTIVE LIGAND RECEPTOR INTERACTION |
| <i>LHCGR</i>     | 2  | 1.24E+03 | 0.466 | NEUROACTIVE LIGAND RECEPTOR INTERACTION |
| <i>S1PR5</i>     | 4  | 6.22E+03 | 0.470 | NEUROACTIVE LIGAND RECEPTOR INTERACTION |
| <i>SSTR3</i>     | 13 | 6.32E+03 | 0.471 | NEUROACTIVE LIGAND RECEPTOR INTERACTION |
| <i>GRIN2A</i>    | 9  | 9.26E+03 | 0.475 | NEUROACTIVE LIGAND RECEPTOR INTERACTION |
| <i>MC5R</i>      | 3  | 2.21E+03 | 0.475 | NEUROACTIVE LIGAND RECEPTOR INTERACTION |
| <i>MC3R</i>      | 2  | 9.04E+02 | 0.477 | NEUROACTIVE LIGAND RECEPTOR INTERACTION |
| <i>NPY2R</i>     | 1  | 2.28E+02 | 0.482 | NEUROACTIVE LIGAND RECEPTOR INTERACTION |
| <i>F2R</i>       | 2  | 6.48E+02 | 0.484 | NEUROACTIVE LIGAND RECEPTOR INTERACTION |
| <i>SSTR5</i>     | 14 | 5.90E+03 | 0.484 | NEUROACTIVE LIGAND RECEPTOR INTERACTION |
| <i>GABRR1</i>    | 3  | 1.04E+03 | 0.486 | NEUROACTIVE LIGAND RECEPTOR INTERACTION |
| <i>ADRA1B</i>    | 6  | 2.10E+03 | 0.501 | NEUROACTIVE LIGAND RECEPTOR INTERACTION |
| <i>GABRA2</i>    | 3  | 2.24E+03 | 0.502 | NEUROACTIVE LIGAND RECEPTOR INTERACTION |
| <i>CHRNB1</i>    | 2  | 3.64E+02 | 0.505 | NEUROACTIVE LIGAND RECEPTOR INTERACTION |
| <i>GALR2</i>     | 4  | 6.54E+03 | 0.506 | NEUROACTIVE LIGAND RECEPTOR INTERACTION |
| <i>OPRK1</i>     | 3  | 5.16E+02 | 0.507 | NEUROACTIVE LIGAND RECEPTOR INTERACTION |
| <i>GRM3</i>      | 4  | 3.25E+03 | 0.520 | NEUROACTIVE LIGAND RECEPTOR INTERACTION |
| <i>CHRNA6</i>    | 5  | 1.38E+03 | 0.522 | NEUROACTIVE LIGAND RECEPTOR INTERACTION |
| <i>LTB4R2</i>    | 4  | 1.01E+03 | 0.527 | NEUROACTIVE LIGAND RECEPTOR INTERACTION |
| <i>CTSG</i>      | 1  | 1.61E+02 | 0.531 | NEUROACTIVE LIGAND RECEPTOR INTERACTION |
| <i>FPR2</i>      | 3  | 1.80E+03 | 0.531 | NEUROACTIVE LIGAND RECEPTOR INTERACTION |
| <i>F2RL2</i>     | 4  | 8.44E+03 | 0.534 | NEUROACTIVE LIGAND RECEPTOR INTERACTION |
| <i>S1PR1</i>     | 2  | 2.46E+03 | 0.537 | NEUROACTIVE LIGAND RECEPTOR INTERACTION |
| <i>CHRNB2</i>    | 4  | 3.61E+03 | 0.542 | NEUROACTIVE LIGAND RECEPTOR INTERACTION |
| <i>NPY5R</i>     | 1  | 7.21E+01 | 0.542 | NEUROACTIVE LIGAND RECEPTOR INTERACTION |
| <i>ADCYAP1R1</i> | 8  | 3.48E+03 | 0.544 | NEUROACTIVE LIGAND RECEPTOR INTERACTION |
| <i>GRIN3A</i>    | 17 | 1.94E+04 | 0.547 | NEUROACTIVE LIGAND RECEPTOR INTERACTION |
| <i>GRIN3B</i>    | 28 | 3.11E+04 | 0.548 | NEUROACTIVE LIGAND RECEPTOR INTERACTION |
| <i>TACR3</i>     | 4  | 3.29E+03 | 0.549 | NEUROACTIVE LIGAND RECEPTOR INTERACTION |
| <i>CCKBR</i>     | 2  | 5.36E+02 | 0.553 | NEUROACTIVE LIGAND RECEPTOR INTERACTION |
| <i>GPR35</i>     | 9  | 1.59E+04 | 0.553 | NEUROACTIVE LIGAND RECEPTOR INTERACTION |
| <i>LPAR2</i>     | 2  | 1.59E+03 | 0.554 | NEUROACTIVE LIGAND RECEPTOR INTERACTION |
| <i>HTR1D</i>     | 5  | 1.45E+03 | 0.558 | NEUROACTIVE LIGAND RECEPTOR INTERACTION |
| <i>GRIN2C</i>    | 12 | 8.47E+03 | 0.564 | NEUROACTIVE LIGAND RECEPTOR INTERACTION |
| <i>MCHR2</i>     | 1  | 1.26E+03 | 0.564 | NEUROACTIVE LIGAND RECEPTOR INTERACTION |
| <i>GHSR</i>      | 3  | 8.21E+02 | 0.565 | NEUROACTIVE LIGAND RECEPTOR INTERACTION |
| <i>ADRB3</i>     | 5  | 1.22E+03 | 0.565 | NEUROACTIVE LIGAND RECEPTOR INTERACTION |
| <i>ADORA1</i>    | 4  | 1.27E+03 | 0.566 | NEUROACTIVE LIGAND RECEPTOR INTERACTION |
| <i>TAAR5</i>     | 11 | 7.90E+03 | 0.567 | NEUROACTIVE LIGAND RECEPTOR INTERACTION |
| <i>GABRG3</i>    | 3  | 3.31E+03 | 0.573 | NEUROACTIVE LIGAND RECEPTOR INTERACTION |
| <i>CHRND</i>     | 10 | 5.11E+03 | 0.578 | NEUROACTIVE LIGAND RECEPTOR INTERACTION |
| <i>ADORA2A</i>   | 4  | 7.09E+02 | 0.579 | NEUROACTIVE LIGAND RECEPTOR INTERACTION |

|         |    |          |       |                                         |
|---------|----|----------|-------|-----------------------------------------|
| TAAR6   | 8  | 6.24E+03 | 0.583 | NEUROACTIVE LIGAND RECEPTOR INTERACTION |
| HCRTR1  | 6  | 2.57E+03 | 0.584 | NEUROACTIVE LIGAND RECEPTOR INTERACTION |
| ADRA1A  | 11 | 1.61E+04 | 0.586 | NEUROACTIVE LIGAND RECEPTOR INTERACTION |
| OPRD1   | 2  | 4.06E+02 | 0.587 | NEUROACTIVE LIGAND RECEPTOR INTERACTION |
| SCTR    | 6  | 6.15E+03 | 0.589 | NEUROACTIVE LIGAND RECEPTOR INTERACTION |
| FPR1    | 5  | 2.74E+03 | 0.591 | NEUROACTIVE LIGAND RECEPTOR INTERACTION |
| CRHR1   | 4  | 7.95E+03 | 0.597 | NEUROACTIVE LIGAND RECEPTOR INTERACTION |
| P2RY13  | 2  | 3.58E+03 | 0.602 | NEUROACTIVE LIGAND RECEPTOR INTERACTION |
| P2RY11  | 9  | 8.60E+03 | 0.608 | NEUROACTIVE LIGAND RECEPTOR INTERACTION |
| TAAR1   | 1  | 5.50E+01 | 0.616 | NEUROACTIVE LIGAND RECEPTOR INTERACTION |
| P2RX7   | 13 | 1.34E+04 | 0.616 | NEUROACTIVE LIGAND RECEPTOR INTERACTION |
| BDKRB1  | 6  | 2.20E+03 | 0.629 | NEUROACTIVE LIGAND RECEPTOR INTERACTION |
| GLP2R   | 5  | 3.84E+03 | 0.631 | NEUROACTIVE LIGAND RECEPTOR INTERACTION |
| GALR3   | 11 | 8.22E+03 | 0.634 | NEUROACTIVE LIGAND RECEPTOR INTERACTION |
| KISS1R  | 2  | 5.28E+02 | 0.635 | NEUROACTIVE LIGAND RECEPTOR INTERACTION |
| GABBR2  | 1  | 5.62E+01 | 0.635 | NEUROACTIVE LIGAND RECEPTOR INTERACTION |
| GABRB3  | 1  | 5.09E+02 | 0.640 | NEUROACTIVE LIGAND RECEPTOR INTERACTION |
| CHRNA7  | 9  | 5.03E+03 | 0.642 | NEUROACTIVE LIGAND RECEPTOR INTERACTION |
| GLRA3   | 2  | 7.52E+02 | 0.646 | NEUROACTIVE LIGAND RECEPTOR INTERACTION |
| PRLHR   | 3  | 3.97E+02 | 0.648 | NEUROACTIVE LIGAND RECEPTOR INTERACTION |
| TAAR2   | 4  | 5.91E+02 | 0.650 | NEUROACTIVE LIGAND RECEPTOR INTERACTION |
| CCKAR   | 3  | 1.40E+03 | 0.653 | NEUROACTIVE LIGAND RECEPTOR INTERACTION |
| MTNR1A  | 7  | 5.22E+03 | 0.662 | NEUROACTIVE LIGAND RECEPTOR INTERACTION |
| GRM8    | 3  | 4.28E+02 | 0.664 | NEUROACTIVE LIGAND RECEPTOR INTERACTION |
| OPRL1   | 12 | 7.90E+03 | 0.665 | NEUROACTIVE LIGAND RECEPTOR INTERACTION |
| NPFFR2  | 4  | 6.97E+02 | 0.666 | NEUROACTIVE LIGAND RECEPTOR INTERACTION |
| TSPO    | 3  | 1.62E+03 | 0.667 | NEUROACTIVE LIGAND RECEPTOR INTERACTION |
| FPR3    | 1  | 7.26E+01 | 0.671 | NEUROACTIVE LIGAND RECEPTOR INTERACTION |
| S1PR3   | 8  | 6.21E+03 | 0.682 | NEUROACTIVE LIGAND RECEPTOR INTERACTION |
| MCHR1   | 7  | 6.51E+03 | 0.683 | NEUROACTIVE LIGAND RECEPTOR INTERACTION |
| P2RY14  | 2  | 2.63E+02 | 0.689 | NEUROACTIVE LIGAND RECEPTOR INTERACTION |
| F2RL3   | 9  | 2.92E+03 | 0.689 | NEUROACTIVE LIGAND RECEPTOR INTERACTION |
| NPBWR2  | 7  | 2.09E+03 | 0.695 | NEUROACTIVE LIGAND RECEPTOR INTERACTION |
| NPY1R   | 4  | 1.41E+03 | 0.698 | NEUROACTIVE LIGAND RECEPTOR INTERACTION |
| HTR4    | 4  | 9.27E+02 | 0.703 | NEUROACTIVE LIGAND RECEPTOR INTERACTION |
| GABRA6  | 4  | 3.70E+03 | 0.709 | NEUROACTIVE LIGAND RECEPTOR INTERACTION |
| GRID2   | 3  | 6.35E+02 | 0.709 | NEUROACTIVE LIGAND RECEPTOR INTERACTION |
| UTS2R   | 5  | 2.45E+03 | 0.712 | NEUROACTIVE LIGAND RECEPTOR INTERACTION |
| HTR7    | 3  | 2.25E+03 | 0.713 | NEUROACTIVE LIGAND RECEPTOR INTERACTION |
| ADORA3  | 3  | 1.40E+03 | 0.716 | NEUROACTIVE LIGAND RECEPTOR INTERACTION |
| GRM1    | 9  | 1.10E+04 | 0.716 | NEUROACTIVE LIGAND RECEPTOR INTERACTION |
| GABRD   | 3  | 1.53E+03 | 0.724 | NEUROACTIVE LIGAND RECEPTOR INTERACTION |
| CHRNA1  | 1  | 9.62E+01 | 0.725 | NEUROACTIVE LIGAND RECEPTOR INTERACTION |
| SSTR2   | 2  | 1.37E+02 | 0.730 | NEUROACTIVE LIGAND RECEPTOR INTERACTION |
| NTSR1   | 15 | 7.46E+03 | 0.732 | NEUROACTIVE LIGAND RECEPTOR INTERACTION |
| GRM2    | 10 | 2.77E+03 | 0.744 | NEUROACTIVE LIGAND RECEPTOR INTERACTION |
| MAS1    | 5  | 1.91E+03 | 0.746 | NEUROACTIVE LIGAND RECEPTOR INTERACTION |
| EDNRB   | 4  | 4.16E+03 | 0.746 | NEUROACTIVE LIGAND RECEPTOR INTERACTION |
| P2RX3   | 3  | 1.58E+02 | 0.748 | NEUROACTIVE LIGAND RECEPTOR INTERACTION |
| CHRNB3  | 2  | 3.62E+02 | 0.758 | NEUROACTIVE LIGAND RECEPTOR INTERACTION |
| CHRNB4  | 6  | 2.86E+03 | 0.758 | NEUROACTIVE LIGAND RECEPTOR INTERACTION |
| LPAR6   | 3  | 1.01E+03 | 0.761 | NEUROACTIVE LIGAND RECEPTOR INTERACTION |
| NTSR2   | 7  | 2.75E+03 | 0.775 | NEUROACTIVE LIGAND RECEPTOR INTERACTION |
| LHB     | 3  | 1.75E+03 | 0.780 | NEUROACTIVE LIGAND RECEPTOR INTERACTION |
| GH2     | 4  | 5.26E+02 | 0.781 | NEUROACTIVE LIGAND RECEPTOR INTERACTION |
| VIPR1   | 6  | 9.78E+02 | 0.785 | NEUROACTIVE LIGAND RECEPTOR INTERACTION |
| ADORA2B | 2  | 8.40E+01 | 0.789 | NEUROACTIVE LIGAND RECEPTOR INTERACTION |
| RXFP1   | 3  | 2.71E+02 | 0.792 | NEUROACTIVE LIGAND RECEPTOR INTERACTION |
| GRID1   | 3  | 1.34E+03 | 0.794 | NEUROACTIVE LIGAND RECEPTOR INTERACTION |
| CHRNG   | 8  | 7.82E+03 | 0.797 | NEUROACTIVE LIGAND RECEPTOR INTERACTION |
| HCRTR2  | 4  | 1.35E+03 | 0.809 | NEUROACTIVE LIGAND RECEPTOR INTERACTION |
| GABRA1  | 1  | 1.48E+01 | 0.809 | NEUROACTIVE LIGAND RECEPTOR INTERACTION |
| AGTR1   | 4  | 5.93E+02 | 0.816 | NEUROACTIVE LIGAND RECEPTOR INTERACTION |
| NPY4R   | 6  | 8.62E+02 | 0.818 | NEUROACTIVE LIGAND RECEPTOR INTERACTION |
| RXFP2   | 8  | 4.25E+03 | 0.819 | NEUROACTIVE LIGAND RECEPTOR INTERACTION |
| OXTR    | 5  | 1.39E+03 | 0.831 | NEUROACTIVE LIGAND RECEPTOR INTERACTION |
| GLP1R   | 8  | 1.62E+03 | 0.834 | NEUROACTIVE LIGAND RECEPTOR INTERACTION |
| HTR2A   | 4  | 1.62E+03 | 0.843 | NEUROACTIVE LIGAND RECEPTOR INTERACTION |
| SSTR1   | 1  | 5.80E+00 | 0.848 | NEUROACTIVE LIGAND RECEPTOR INTERACTION |
| HRH1    | 6  | 6.30E+02 | 0.857 | NEUROACTIVE LIGAND RECEPTOR INTERACTION |
| HTR1F   | 1  | 4.98E+01 | 0.857 | NEUROACTIVE LIGAND RECEPTOR INTERACTION |
| CALCRL  | 1  | 2.34E+01 | 0.864 | NEUROACTIVE LIGAND RECEPTOR INTERACTION |
| PTGER2  | 2  | 1.14E+03 | 0.871 | NEUROACTIVE LIGAND RECEPTOR INTERACTION |
| LEPR    | 9  | 1.82E+03 | 0.874 | NEUROACTIVE LIGAND RECEPTOR INTERACTION |

|        |    |          |       |                                         |
|--------|----|----------|-------|-----------------------------------------|
| GHR    | 8  | 1.46E+03 | 0.874 | NEUROACTIVE LIGAND RECEPTOR INTERACTION |
| AVPR1A | 4  | 1.37E+03 | 0.875 | NEUROACTIVE LIGAND RECEPTOR INTERACTION |
| MTNR1B | 6  | 4.84E+02 | 0.878 | NEUROACTIVE LIGAND RECEPTOR INTERACTION |
| CHRM5  | 6  | 2.85E+02 | 0.885 | NEUROACTIVE LIGAND RECEPTOR INTERACTION |
| MC1R   | 17 | 2.05E+03 | 0.891 | NEUROACTIVE LIGAND RECEPTOR INTERACTION |
| TSHR   | 5  | 4.59E+02 | 0.895 | NEUROACTIVE LIGAND RECEPTOR INTERACTION |
| PTGER3 | 1  | 1.97E+01 | 0.901 | NEUROACTIVE LIGAND RECEPTOR INTERACTION |
| HTR1E  | 1  | 7.94E+00 | 0.909 | NEUROACTIVE LIGAND RECEPTOR INTERACTION |
| CHRM4  | 1  | 2.02E+00 | 0.914 | NEUROACTIVE LIGAND RECEPTOR INTERACTION |
| THRA   | 1  | 8.38E-01 | 0.948 | NEUROACTIVE LIGAND RECEPTOR INTERACTION |
| DRD3   | 1  | 1.26E-01 | 0.982 | NEUROACTIVE LIGAND RECEPTOR INTERACTION |
| ADRA2C | 1  | 5.32E-02 | 0.983 | NEUROACTIVE LIGAND RECEPTOR INTERACTION |
| PTGER4 | 1  | 2.47E-01 | 0.993 | NEUROACTIVE LIGAND RECEPTOR INTERACTION |
| CHRM3  | 3  | 2.38E+02 | 1     | NEUROACTIVE LIGAND RECEPTOR INTERACTION |
| GRIK1  | 4  | 7.47E+00 | 1     | NEUROACTIVE LIGAND RECEPTOR INTERACTION |
| P2RX4  | 9  | 3.74E+02 | 1     | NEUROACTIVE LIGAND RECEPTOR INTERACTION |
| HTR6   | 6  | 5.49E+01 | 1     | NEUROACTIVE LIGAND RECEPTOR INTERACTION |
| THRB   | 3  | 5.72E+01 | 1     | NEUROACTIVE LIGAND RECEPTOR INTERACTION |
| PRSS3  | 13 | 1.72E+03 | 1     | NEUROACTIVE LIGAND RECEPTOR INTERACTION |
| NR3C1  | 2  | 2.23E+02 | 1     | NEUROACTIVE LIGAND RECEPTOR INTERACTION |
| PTH2R  | 7  | 1.16E+02 | 1     | NEUROACTIVE LIGAND RECEPTOR INTERACTION |
| P2RY2  | 6  | 1.00E+01 | 1     | NEUROACTIVE LIGAND RECEPTOR INTERACTION |
| P2RX2  | 5  | 4.35E+02 | 1     | NEUROACTIVE LIGAND RECEPTOR INTERACTION |
| P2RX6  | 2  | 1.55E+00 | 1     | NEUROACTIVE LIGAND RECEPTOR INTERACTION |
| NMUR1  | 8  | 8.72E+01 | 1     | NEUROACTIVE LIGAND RECEPTOR INTERACTION |
| LPAR3  | 2  | 2.37E+01 | 1     | NEUROACTIVE LIGAND RECEPTOR INTERACTION |
| DRD1   | 2  | 6.12E-01 | 1     | NEUROACTIVE LIGAND RECEPTOR INTERACTION |
| GRIK5  | 9  | 2.36E+02 | 1     | NEUROACTIVE LIGAND RECEPTOR INTERACTION |
| HRH4   | 2  | 5.02E+01 | 1     | NEUROACTIVE LIGAND RECEPTOR INTERACTION |
| GLRA1  | 3  | 2.52E+01 | 1     | NEUROACTIVE LIGAND RECEPTOR INTERACTION |
| ADRA2B | 3  | 7.47E+01 | 1     | NEUROACTIVE LIGAND RECEPTOR INTERACTION |
| BDKRB2 | 2  | 6.28E+00 | 1     | NEUROACTIVE LIGAND RECEPTOR INTERACTION |
| GRIK3  | 2  | 3.34E+01 | 1     | NEUROACTIVE LIGAND RECEPTOR INTERACTION |

| Gene     | NumVar | Q        | Pvalue | Gene-set           |
|----------|--------|----------|--------|--------------------|
| NDUFA10  | 3      | 3.11E+04 | 0.001  | PARKINSONS DISEASE |
| NDUFS8   | 9      | 2.11E+04 | 0.008  | PARKINSONS DISEASE |
| LRRK2    | 18     | 5.07E+04 | 0.016  | PARKINSONS DISEASE |
| APAF1    | 13     | 3.41E+04 | 0.020  | PARKINSONS DISEASE |
| UQCR10   | 1      | 7.97E+03 | 0.037  | PARKINSONS DISEASE |
| UQCR11   | 1      | 6.97E+02 | 0.047  | PARKINSONS DISEASE |
| NDUFS7   | 10     | 4.16E+04 | 0.058  | PARKINSONS DISEASE |
| COX7A1   | 2      | 1.95E+03 | 0.075  | PARKINSONS DISEASE |
| NDUFA7   | 2      | 1.24E+04 | 0.077  | PARKINSONS DISEASE |
| PRKN     | 10     | 2.32E+04 | 0.093  | PARKINSONS DISEASE |
| COX6B2   | 1      | 2.21E+03 | 0.107  | PARKINSONS DISEASE |
| NDUFS5   | 1      | 4.64E+02 | 0.109  | PARKINSONS DISEASE |
| NDUFS6   | 1      | 4.30E+02 | 0.135  | PARKINSONS DISEASE |
| NDUFB5   | 1      | 6.02E+03 | 0.159  | PARKINSONS DISEASE |
| COX6A2   | 2      | 4.59E+03 | 0.168  | PARKINSONS DISEASE |
| UCHL1    | 2      | 2.11E+03 | 0.174  | PARKINSONS DISEASE |
| GPR37    | 7      | 1.15E+04 | 0.206  | PARKINSONS DISEASE |
| VDAC3    | 3      | 3.66E+03 | 0.206  | PARKINSONS DISEASE |
| NDUFA9   | 5      | 8.13E+03 | 0.240  | PARKINSONS DISEASE |
| VDAC1    | 2      | 5.69E+02 | 0.247  | PARKINSONS DISEASE |
| NDUFA2   | 2      | 1.54E+03 | 0.275  | PARKINSONS DISEASE |
| UQCRCB   | 1      | 3.58E+02 | 0.292  | PARKINSONS DISEASE |
| SDHB     | 2      | 6.63E+03 | 0.299  | PARKINSONS DISEASE |
| NDUFA4L2 | 1      | 3.40E+02 | 0.307  | PARKINSONS DISEASE |
| SLC6A3   | 5      | 2.85E+03 | 0.338  | PARKINSONS DISEASE |
| NDUFB3   | 4      | 2.55E+03 | 0.350  | PARKINSONS DISEASE |
| COX6A1   | 3      | 1.24E+03 | 0.358  | PARKINSONS DISEASE |
| NDUFS4   | 2      | 4.76E+02 | 0.396  | PARKINSONS DISEASE |
| UBE2J1   | 1      | 8.39E+01 | 0.433  | PARKINSONS DISEASE |
| SNCAIP   | 10     | 1.58E+04 | 0.434  | PARKINSONS DISEASE |
| NDUFS3   | 1      | 9.32E+02 | 0.436  | PARKINSONS DISEASE |
| NDUFB6   | 2      | 6.88E+02 | 0.440  | PARKINSONS DISEASE |
| NDUFB9   | 1      | 4.30E+02 | 0.443  | PARKINSONS DISEASE |
| CYC1     | 5      | 3.74E+03 | 0.448  | PARKINSONS DISEASE |
| COX4I1   | 2      | 1.10E+03 | 0.451  | PARKINSONS DISEASE |
| NDUFA3   | 1      | 1.99E+03 | 0.452  | PARKINSONS DISEASE |
| SDHD     | 4      | 9.99E+03 | 0.452  | PARKINSONS DISEASE |
| UQCRC1   | 6      | 6.87E+03 | 0.454  | PARKINSONS DISEASE |
| COX8C    | 1      | 1.25E+03 | 0.465  | PARKINSONS DISEASE |

|          |    |          |       |                    |
|----------|----|----------|-------|--------------------|
| COX7A2L  | 2  | 6.42E+02 | 0.468 | PARKINSONS DISEASE |
| SLC18A1  | 6  | 2.39E+03 | 0.532 | PARKINSONS DISEASE |
| NDUFS2   | 3  | 2.06E+03 | 0.544 | PARKINSONS DISEASE |
| SLC25A31 | 4  | 2.00E+03 | 0.547 | PARKINSONS DISEASE |
| COX5B    | 1  | 1.23E+02 | 0.550 | PARKINSONS DISEASE |
| UBE2L6   | 1  | 6.07E+01 | 0.557 | PARKINSONS DISEASE |
| NDUFB10  | 1  | 4.50E+01 | 0.589 | PARKINSONS DISEASE |
| CASP9    | 8  | 6.15E+03 | 0.602 | PARKINSONS DISEASE |
| SDHA     | 2  | 4.17E+02 | 0.608 | PARKINSONS DISEASE |
| NDUFA6   | 1  | 3.99E+02 | 0.625 | PARKINSONS DISEASE |
| UBA7     | 11 | 6.11E+03 | 0.630 | PARKINSONS DISEASE |
| VDAC2    | 1  | 4.55E+01 | 0.632 | PARKINSONS DISEASE |
| NDUFV1   | 1  | 4.58E+01 | 0.671 | PARKINSONS DISEASE |
| SDHC     | 3  | 2.73E+03 | 0.715 | PARKINSONS DISEASE |
| COX5A    | 4  | 6.19E+02 | 0.750 | PARKINSONS DISEASE |
| COX4I2   | 3  | 3.59E+02 | 0.754 | PARKINSONS DISEASE |
| TH       | 4  | 1.08E+03 | 0.757 | PARKINSONS DISEASE |
| PARK7    | 3  | 8.53E+02 | 0.765 | PARKINSONS DISEASE |
| COX7A2   | 1  | 4.51E+01 | 0.796 | PARKINSONS DISEASE |
| UQCRC2   | 3  | 3.68E+02 | 0.823 | PARKINSONS DISEASE |
| NDUFA5   | 3  | 2.42E+02 | 0.857 | PARKINSONS DISEASE |
| HTRA2    | 4  | 7.48E+02 | 0.871 | PARKINSONS DISEASE |
| NDUFV3   | 7  | 7.46E+02 | 0.884 | PARKINSONS DISEASE |
| COX6B1   | 1  | 2.55E+00 | 0.911 | PARKINSONS DISEASE |
| UQCRHL   | 1  | 2.88E+00 | 0.915 | PARKINSONS DISEASE |
| COX6C    | 1  | 1.03E+01 | 0.939 | PARKINSONS DISEASE |
| UBE2J2   | 2  | 1.71E+01 | 1     | PARKINSONS DISEASE |
| CASP3    | 2  | 2.05E+02 | 1     | PARKINSONS DISEASE |
| NDUFS1   | 9  | 1.78E+01 | 1     | PARKINSONS DISEASE |
| PPID     | 2  | 7.90E+01 | 1     | PARKINSONS DISEASE |
| PINK1    | 4  | 5.35E+01 | 1     | PARKINSONS DISEASE |
| NDUFB1   | 3  | 6.84E+02 | 1     | PARKINSONS DISEASE |

| Gene       | NumVar | Q        | Pvalue   | Gene-set                                |
|------------|--------|----------|----------|-----------------------------------------|
| TOP2B      | 11     | 1.08E+05 | 2.88E-04 | POST TRANSLATIONAL PROTEIN MODIFICATION |
| ABRAXAS1   | 3      | 3.26E+04 | 0.001    | POST TRANSLATIONAL PROTEIN MODIFICATION |
| CSNK1D     | 4      | 1.32E+04 | 0.002    | POST TRANSLATIONAL PROTEIN MODIFICATION |
| HIST1H2BA  | 3      | 6.50E+03 | 0.003    | POST TRANSLATIONAL PROTEIN MODIFICATION |
| MUC4       | 870    | 1.68E+07 | 0.006    | POST TRANSLATIONAL PROTEIN MODIFICATION |
| GAN        | 5      | 3.02E+04 | 0.006    | POST TRANSLATIONAL PROTEIN MODIFICATION |
| HDAC4      | 9      | 1.96E+04 | 0.009    | POST TRANSLATIONAL PROTEIN MODIFICATION |
| HIST2H2BE  | 1      | 5.20E+03 | 0.009    | POST TRANSLATIONAL PROTEIN MODIFICATION |
| BST1       | 5      | 4.91E+04 | 0.010    | POST TRANSLATIONAL PROTEIN MODIFICATION |
| ADAMTS19   | 8      | 3.14E+04 | 0.010    | POST TRANSLATIONAL PROTEIN MODIFICATION |
| MAN1B1     | 15     | 3.58E+04 | 0.010    | POST TRANSLATIONAL PROTEIN MODIFICATION |
| DCAF10     | 3      | 1.03E+04 | 0.010    | POST TRANSLATIONAL PROTEIN MODIFICATION |
| COG5       | 10     | 3.93E+04 | 0.011    | POST TRANSLATIONAL PROTEIN MODIFICATION |
| BRCA1      | 19     | 4.99E+04 | 0.012    | POST TRANSLATIONAL PROTEIN MODIFICATION |
| CSF1       | 6      | 1.82E+04 | 0.012    | POST TRANSLATIONAL PROTEIN MODIFICATION |
| NUCB1      | 5      | 3.87E+04 | 0.013    | POST TRANSLATIONAL PROTEIN MODIFICATION |
| ARFGAP1    | 8      | 2.88E+04 | 0.013    | POST TRANSLATIONAL PROTEIN MODIFICATION |
| PHC1       | 8      | 3.98E+04 | 0.014    | POST TRANSLATIONAL PROTEIN MODIFICATION |
| SENP5      | 9      | 4.23E+04 | 0.015    | POST TRANSLATIONAL PROTEIN MODIFICATION |
| ENGASE     | 15     | 4.17E+04 | 0.015    | POST TRANSLATIONAL PROTEIN MODIFICATION |
| TUBB1      | 8      | 4.79E+04 | 0.016    | POST TRANSLATIONAL PROTEIN MODIFICATION |
| RTN4RL1    | 5      | 3.58E+04 | 0.016    | POST TRANSLATIONAL PROTEIN MODIFICATION |
| ST6GALNAC6 | 4      | 2.75E+04 | 0.016    | POST TRANSLATIONAL PROTEIN MODIFICATION |
| FBXW12     | 7      | 3.12E+04 | 0.016    | POST TRANSLATIONAL PROTEIN MODIFICATION |
| WDTC1      | 3      | 6.36E+03 | 0.018    | POST TRANSLATIONAL PROTEIN MODIFICATION |
| CDC25A     | 2      | 2.36E+04 | 0.018    | POST TRANSLATIONAL PROTEIN MODIFICATION |
| NOD1       | 8      | 1.04E+04 | 0.018    | POST TRANSLATIONAL PROTEIN MODIFICATION |
| DDX17      | 4      | 6.54E+03 | 0.018    | POST TRANSLATIONAL PROTEIN MODIFICATION |
| HIST1H2BE  | 2      | 1.05E+04 | 0.019    | POST TRANSLATIONAL PROTEIN MODIFICATION |
| SATB1      | 3      | 4.50E+03 | 0.020    | POST TRANSLATIONAL PROTEIN MODIFICATION |
| COPG1      | 3      | 5.26E+03 | 0.020    | POST TRANSLATIONAL PROTEIN MODIFICATION |
| HIST1H2BO  | 1      | 8.61E+02 | 0.021    | POST TRANSLATIONAL PROTEIN MODIFICATION |
| ST8SIA3    | 2      | 2.68E+03 | 0.021    | POST TRANSLATIONAL PROTEIN MODIFICATION |
| RAB44      | 19     | 9.95E+04 | 0.021    | POST TRANSLATIONAL PROTEIN MODIFICATION |
| APP        | 2      | 3.42E+03 | 0.021    | POST TRANSLATIONAL PROTEIN MODIFICATION |
| B4GALT1    | 1      | 1.34E+03 | 0.022    | POST TRANSLATIONAL PROTEIN MODIFICATION |
| VCP        | 2      | 3.84E+03 | 0.022    | POST TRANSLATIONAL PROTEIN MODIFICATION |
| ASGR1      | 1      | 8.46E+02 | 0.023    | POST TRANSLATIONAL PROTEIN MODIFICATION |
| USP17L17   | 3      | 1.95E+04 | 0.027    | POST TRANSLATIONAL PROTEIN MODIFICATION |
| NUP35      | 2      | 4.09E+03 | 0.027    | POST TRANSLATIONAL PROTEIN MODIFICATION |

|                  |     |          |       |                                         |
|------------------|-----|----------|-------|-----------------------------------------|
| <i>FBXW8</i>     | 9   | 2.08E+04 | 0.029 | POST TRANSLATIONAL PROTEIN MODIFICATION |
| <i>ACTR10</i>    | 2   | 4.89E+03 | 0.029 | POST TRANSLATIONAL PROTEIN MODIFICATION |
| <i>EDEM1</i>     | 8   | 1.37E+04 | 0.030 | POST TRANSLATIONAL PROTEIN MODIFICATION |
| <i>SOCS3</i>     | 1   | 7.91E+02 | 0.030 | POST TRANSLATIONAL PROTEIN MODIFICATION |
| <i>DYNC1LI2</i>  | 2   | 2.58E+03 | 0.030 | POST TRANSLATIONAL PROTEIN MODIFICATION |
| <i>STT3A</i>     | 2   | 2.10E+03 | 0.031 | POST TRANSLATIONAL PROTEIN MODIFICATION |
| <i>SPON2</i>     | 5   | 3.66E+04 | 0.033 | POST TRANSLATIONAL PROTEIN MODIFICATION |
| <i>MGAT1</i>     | 1   | 1.98E+03 | 0.036 | POST TRANSLATIONAL PROTEIN MODIFICATION |
| <i>ADAMTS4</i>   | 14  | 4.21E+04 | 0.036 | POST TRANSLATIONAL PROTEIN MODIFICATION |
| <i>ITIH2</i>     | 13  | 4.30E+04 | 0.037 | POST TRANSLATIONAL PROTEIN MODIFICATION |
| <i>DYNC1LI1</i>  | 5   | 2.20E+04 | 0.038 | POST TRANSLATIONAL PROTEIN MODIFICATION |
| <i>FBXL12</i>    | 5   | 8.45E+03 | 0.038 | POST TRANSLATIONAL PROTEIN MODIFICATION |
| <i>ABRAXAS2</i>  | 2   | 2.64E+03 | 0.039 | POST TRANSLATIONAL PROTEIN MODIFICATION |
| <i>USP5</i>      | 1   | 5.28E+02 | 0.042 | POST TRANSLATIONAL PROTEIN MODIFICATION |
| <i>NLRP3</i>     | 5   | 1.80E+04 | 0.044 | POST TRANSLATIONAL PROTEIN MODIFICATION |
| <i>TAF10</i>     | 5   | 7.04E+03 | 0.045 | POST TRANSLATIONAL PROTEIN MODIFICATION |
| <i>KLHL9</i>     | 1   | 3.46E+03 | 0.046 | POST TRANSLATIONAL PROTEIN MODIFICATION |
| <i>F2</i>        | 5   | 7.45E+03 | 0.047 | POST TRANSLATIONAL PROTEIN MODIFICATION |
| <i>FBXL8</i>     | 2   | 5.90E+03 | 0.049 | POST TRANSLATIONAL PROTEIN MODIFICATION |
| <i>MUC17</i>     | 222 | 2.02E+06 | 0.049 | POST TRANSLATIONAL PROTEIN MODIFICATION |
| <i>AGBL5</i>     | 5   | 2.55E+04 | 0.051 | POST TRANSLATIONAL PROTEIN MODIFICATION |
| <i>DDB2</i>      | 2   | 6.07E+03 | 0.053 | POST TRANSLATIONAL PROTEIN MODIFICATION |
| <i>PLET1</i>     | 4   | 2.35E+04 | 0.054 | POST TRANSLATIONAL PROTEIN MODIFICATION |
| <i>SLC17A5</i>   | 5   | 1.63E+04 | 0.054 | POST TRANSLATIONAL PROTEIN MODIFICATION |
| <i>ICMT</i>      | 2   | 1.00E+04 | 0.057 | POST TRANSLATIONAL PROTEIN MODIFICATION |
| <i>USP17L3</i>   | 12  | 4.50E+04 | 0.057 | POST TRANSLATIONAL PROTEIN MODIFICATION |
| <i>USP17L1</i>   | 12  | 4.50E+04 | 0.057 | POST TRANSLATIONAL PROTEIN MODIFICATION |
| <i>NUP107</i>    | 5   | 1.43E+04 | 0.058 | POST TRANSLATIONAL PROTEIN MODIFICATION |
| <i>TUBB8</i>     | 5   | 1.83E+04 | 0.058 | POST TRANSLATIONAL PROTEIN MODIFICATION |
| <i>NUP93</i>     | 5   | 9.66E+03 | 0.059 | POST TRANSLATIONAL PROTEIN MODIFICATION |
| <i>GOLM1</i>     | 12  | 2.69E+04 | 0.059 | POST TRANSLATIONAL PROTEIN MODIFICATION |
| <i>NPL</i>       | 6   | 4.06E+03 | 0.060 | POST TRANSLATIONAL PROTEIN MODIFICATION |
| <i>DOLK</i>      | 6   | 1.71E+04 | 0.060 | POST TRANSLATIONAL PROTEIN MODIFICATION |
| <i>FBXL7</i>     | 5   | 6.27E+03 | 0.061 | POST TRANSLATIONAL PROTEIN MODIFICATION |
| <i>USP7</i>      | 3   | 5.36E+03 | 0.062 | POST TRANSLATIONAL PROTEIN MODIFICATION |
| <i>IL6</i>       | 3   | 2.27E+04 | 0.062 | POST TRANSLATIONAL PROTEIN MODIFICATION |
| <i>RXRA</i>      | 3   | 9.87E+03 | 0.064 | POST TRANSLATIONAL PROTEIN MODIFICATION |
| <i>MAVS</i>      | 5   | 5.63E+03 | 0.064 | POST TRANSLATIONAL PROTEIN MODIFICATION |
| <i>HIST1H2AJ</i> | 1   | 8.79E+02 | 0.065 | POST TRANSLATIONAL PROTEIN MODIFICATION |
| <i>ANKRD9</i>    | 1   | 1.75E+03 | 0.067 | POST TRANSLATIONAL PROTEIN MODIFICATION |
| <i>ALG6</i>      | 1   | 1.24E+04 | 0.068 | POST TRANSLATIONAL PROTEIN MODIFICATION |
| <i>PIGK</i>      | 1   | 9.37E+02 | 0.069 | POST TRANSLATIONAL PROTEIN MODIFICATION |
| <i>TECTA</i>     | 15  | 6.03E+04 | 0.070 | POST TRANSLATIONAL PROTEIN MODIFICATION |
| <i>COG4</i>      | 5   | 1.41E+04 | 0.072 | POST TRANSLATIONAL PROTEIN MODIFICATION |
| <i>CNTN3</i>     | 11  | 4.49E+04 | 0.073 | POST TRANSLATIONAL PROTEIN MODIFICATION |
| <i>RUVBL1</i>    | 3   | 4.18E+03 | 0.074 | POST TRANSLATIONAL PROTEIN MODIFICATION |
| <i>RAB13</i>     | 1   | 6.28E+03 | 0.074 | POST TRANSLATIONAL PROTEIN MODIFICATION |
| <i>CREBBP</i>    | 19  | 3.85E+04 | 0.075 | POST TRANSLATIONAL PROTEIN MODIFICATION |
| <i>NEU2</i>      | 3   | 9.10E+03 | 0.076 | POST TRANSLATIONAL PROTEIN MODIFICATION |
| <i>HIST1H2BG</i> | 2   | 1.64E+03 | 0.076 | POST TRANSLATIONAL PROTEIN MODIFICATION |
| <i>TEX101</i>    | 1   | 5.16E+02 | 0.080 | POST TRANSLATIONAL PROTEIN MODIFICATION |
| <i>CDK1</i>      | 2   | 1.73E+03 | 0.081 | POST TRANSLATIONAL PROTEIN MODIFICATION |
| <i>USP24</i>     | 13  | 1.74E+04 | 0.082 | POST TRANSLATIONAL PROTEIN MODIFICATION |
| <i>TPGS1</i>     | 5   | 1.43E+04 | 0.082 | POST TRANSLATIONAL PROTEIN MODIFICATION |
| <i>HGS</i>       | 8   | 9.40E+03 | 0.083 | POST TRANSLATIONAL PROTEIN MODIFICATION |
| <i>KNG1</i>      | 2   | 3.00E+03 | 0.084 | POST TRANSLATIONAL PROTEIN MODIFICATION |
| <i>FBXW9</i>     | 8   | 7.14E+04 | 0.085 | POST TRANSLATIONAL PROTEIN MODIFICATION |
| <i>ATXN7</i>     | 13  | 2.42E+04 | 0.086 | POST TRANSLATIONAL PROTEIN MODIFICATION |
| <i>RPS27A</i>    | 1   | 2.69E+03 | 0.087 | POST TRANSLATIONAL PROTEIN MODIFICATION |
| <i>GATA3</i>     | 2   | 1.45E+03 | 0.087 | POST TRANSLATIONAL PROTEIN MODIFICATION |
| <i>CAND1</i>     | 4   | 3.76E+03 | 0.090 | POST TRANSLATIONAL PROTEIN MODIFICATION |
| <i>AFP</i>       | 7   | 2.60E+04 | 0.091 | POST TRANSLATIONAL PROTEIN MODIFICATION |
| <i>EDEM2</i>     | 4   | 9.43E+03 | 0.091 | POST TRANSLATIONAL PROTEIN MODIFICATION |
| <i>RNF135</i>    | 10  | 3.45E+04 | 0.091 | POST TRANSLATIONAL PROTEIN MODIFICATION |
| <i>UBE2T</i>     | 1   | 8.78E+02 | 0.091 | POST TRANSLATIONAL PROTEIN MODIFICATION |
| <i>LARGE2</i>    | 12  | 2.28E+04 | 0.091 | POST TRANSLATIONAL PROTEIN MODIFICATION |
| <i>ARFGAP2</i>   | 3   | 1.43E+04 | 0.092 | POST TRANSLATIONAL PROTEIN MODIFICATION |
| <i>PRKN</i>      | 10  | 2.32E+04 | 0.093 | POST TRANSLATIONAL PROTEIN MODIFICATION |
| <i>STX5</i>      | 6   | 1.12E+04 | 0.094 | POST TRANSLATIONAL PROTEIN MODIFICATION |
| <i>LY6E</i>      | 1   | 9.34E+02 | 0.095 | POST TRANSLATIONAL PROTEIN MODIFICATION |
| <i>MCRS1</i>     | 1   | 7.50E+02 | 0.095 | POST TRANSLATIONAL PROTEIN MODIFICATION |
| <i>COPB2</i>     | 2   | 1.95E+03 | 0.096 | POST TRANSLATIONAL PROTEIN MODIFICATION |
| <i>PPP6R3</i>    | 5   | 2.60E+04 | 0.096 | POST TRANSLATIONAL PROTEIN MODIFICATION |
| <i>SEH1L</i>     | 2   | 1.17E+04 | 0.097 | POST TRANSLATIONAL PROTEIN MODIFICATION |

|                   |     |          |       |                                         |
|-------------------|-----|----------|-------|-----------------------------------------|
| <i>SPTBN2</i>     | 17  | 3.45E+04 | 0.097 | POST TRANSLATIONAL PROTEIN MODIFICATION |
| <i>PARP1</i>      | 8   | 1.22E+04 | 0.098 | POST TRANSLATIONAL PROTEIN MODIFICATION |
| <i>ST6GAL2</i>    | 10  | 3.49E+04 | 0.099 | POST TRANSLATIONAL PROTEIN MODIFICATION |
| <i>RPN1</i>       | 8   | 7.20E+03 | 0.100 | POST TRANSLATIONAL PROTEIN MODIFICATION |
| <i>RELA</i>       | 3   | 8.06E+03 | 0.100 | POST TRANSLATIONAL PROTEIN MODIFICATION |
| <i>KIN</i>        | 2   | 1.30E+03 | 0.101 | POST TRANSLATIONAL PROTEIN MODIFICATION |
| <i>THSD7A</i>     | 8   | 1.41E+04 | 0.102 | POST TRANSLATIONAL PROTEIN MODIFICATION |
| <i>TRAPPC6A</i>   | 4   | 5.10E+03 | 0.102 | POST TRANSLATIONAL PROTEIN MODIFICATION |
| <i>COMMD2</i>     | 3   | 6.47E+03 | 0.103 | POST TRANSLATIONAL PROTEIN MODIFICATION |
| <i>MUC3A</i>      | 58  | 4.50E+05 | 0.104 | POST TRANSLATIONAL PROTEIN MODIFICATION |
| <i>APOB</i>       | 42  | 8.05E+04 | 0.105 | POST TRANSLATIONAL PROTEIN MODIFICATION |
| <i>USP17L4</i>    | 4   | 1.12E+04 | 0.105 | POST TRANSLATIONAL PROTEIN MODIFICATION |
| <i>ASB2</i>       | 11  | 2.81E+04 | 0.105 | POST TRANSLATIONAL PROTEIN MODIFICATION |
| <i>WDR48</i>      | 2   | 7.15E+03 | 0.106 | POST TRANSLATIONAL PROTEIN MODIFICATION |
| <i>KLHL25</i>     | 4   | 2.00E+04 | 0.106 | POST TRANSLATIONAL PROTEIN MODIFICATION |
| <i>USP20</i>      | 11  | 3.19E+04 | 0.107 | POST TRANSLATIONAL PROTEIN MODIFICATION |
| <i>DPH6</i>       | 6   | 4.45E+03 | 0.107 | POST TRANSLATIONAL PROTEIN MODIFICATION |
| <i>HIST1H2BH</i>  | 1   | 7.15E+02 | 0.109 | POST TRANSLATIONAL PROTEIN MODIFICATION |
| <i>TAB1</i>       | 3   | 2.23E+03 | 0.109 | POST TRANSLATIONAL PROTEIN MODIFICATION |
| <i>APOL1</i>      | 13  | 7.55E+03 | 0.112 | POST TRANSLATIONAL PROTEIN MODIFICATION |
| <i>SCG2</i>       | 3   | 1.23E+04 | 0.113 | POST TRANSLATIONAL PROTEIN MODIFICATION |
| <i>GALNTL6</i>    | 2   | 1.09E+03 | 0.113 | POST TRANSLATIONAL PROTEIN MODIFICATION |
| <i>NUP210</i>     | 28  | 3.39E+04 | 0.114 | POST TRANSLATIONAL PROTEIN MODIFICATION |
| <i>TFAP2C</i>     | 2   | 1.22E+03 | 0.114 | POST TRANSLATIONAL PROTEIN MODIFICATION |
| <i>VNN2</i>       | 7   | 2.23E+04 | 0.116 | POST TRANSLATIONAL PROTEIN MODIFICATION |
| <i>NR2C1</i>      | 4   | 5.86E+03 | 0.116 | POST TRANSLATIONAL PROTEIN MODIFICATION |
| <i>GBF1</i>       | 5   | 5.83E+03 | 0.116 | POST TRANSLATIONAL PROTEIN MODIFICATION |
| <i>HIST1H4F</i>   | 1   | 3.78E+03 | 0.118 | POST TRANSLATIONAL PROTEIN MODIFICATION |
| <i>CBX4</i>       | 4   | 1.09E+04 | 0.118 | POST TRANSLATIONAL PROTEIN MODIFICATION |
| <i>SOCS6</i>      | 2   | 2.26E+03 | 0.119 | POST TRANSLATIONAL PROTEIN MODIFICATION |
| <i>SUMF1</i>      | 3   | 4.22E+03 | 0.119 | POST TRANSLATIONAL PROTEIN MODIFICATION |
| <i>TTLL9</i>      | 7   | 1.33E+04 | 0.120 | POST TRANSLATIONAL PROTEIN MODIFICATION |
| <i>CCNF</i>       | 5   | 1.49E+04 | 0.120 | POST TRANSLATIONAL PROTEIN MODIFICATION |
| <i>MUC16</i>      | 190 | 2.15E+05 | 0.122 | POST TRANSLATIONAL PROTEIN MODIFICATION |
| <i>TPR</i>        | 16  | 2.16E+04 | 0.123 | POST TRANSLATIONAL PROTEIN MODIFICATION |
| <i>KLHL11</i>     | 2   | 4.89E+03 | 0.126 | POST TRANSLATIONAL PROTEIN MODIFICATION |
| <i>STX17</i>      | 2   | 6.90E+03 | 0.126 | POST TRANSLATIONAL PROTEIN MODIFICATION |
| <i>CD52</i>       | 1   | 4.15E+03 | 0.126 | POST TRANSLATIONAL PROTEIN MODIFICATION |
| <i>HERC3</i>      | 5   | 8.36E+03 | 0.128 | POST TRANSLATIONAL PROTEIN MODIFICATION |
| <i>SIAH2</i>      | 3   | 1.50E+03 | 0.130 | POST TRANSLATIONAL PROTEIN MODIFICATION |
| <i>RAB23</i>      | 2   | 8.09E+03 | 0.130 | POST TRANSLATIONAL PROTEIN MODIFICATION |
| <i>GALNT13</i>    | 7   | 4.99E+03 | 0.131 | POST TRANSLATIONAL PROTEIN MODIFICATION |
| <i>TMED9</i>      | 2   | 2.02E+03 | 0.132 | POST TRANSLATIONAL PROTEIN MODIFICATION |
| <i>UBA2</i>       | 3   | 1.30E+04 | 0.133 | POST TRANSLATIONAL PROTEIN MODIFICATION |
| <i>DCAF4</i>      | 12  | 3.95E+04 | 0.134 | POST TRANSLATIONAL PROTEIN MODIFICATION |
| <i>RNF181</i>     | 3   | 1.71E+04 | 0.135 | POST TRANSLATIONAL PROTEIN MODIFICATION |
| <i>RAB3D</i>      | 3   | 3.42E+03 | 0.137 | POST TRANSLATIONAL PROTEIN MODIFICATION |
| <i>XPC</i>        | 9   | 2.41E+04 | 0.139 | POST TRANSLATIONAL PROTEIN MODIFICATION |
| <i>PEX12</i>      | 3   | 1.33E+04 | 0.139 | POST TRANSLATIONAL PROTEIN MODIFICATION |
| <i>DNMT1</i>      | 17  | 1.99E+04 | 0.139 | POST TRANSLATIONAL PROTEIN MODIFICATION |
| <i>RAB21</i>      | 2   | 1.08E+04 | 0.142 | POST TRANSLATIONAL PROTEIN MODIFICATION |
| <i>ST3GAL1</i>    | 4   | 1.96E+04 | 0.142 | POST TRANSLATIONAL PROTEIN MODIFICATION |
| <i>B4GAT1</i>     | 1   | 1.23E+03 | 0.145 | POST TRANSLATIONAL PROTEIN MODIFICATION |
| <i>ADRB2</i>      | 2   | 8.42E+03 | 0.146 | POST TRANSLATIONAL PROTEIN MODIFICATION |
| <i>XRCC4</i>      | 5   | 1.65E+04 | 0.147 | POST TRANSLATIONAL PROTEIN MODIFICATION |
| <i>ST6GALNAC1</i> | 2   | 8.30E+03 | 0.147 | POST TRANSLATIONAL PROTEIN MODIFICATION |
| <i>SYVN1</i>      | 3   | 1.88E+03 | 0.148 | POST TRANSLATIONAL PROTEIN MODIFICATION |
| <i>ARSG</i>       | 16  | 3.16E+04 | 0.148 | POST TRANSLATIONAL PROTEIN MODIFICATION |
| <i>FBXO6</i>      | 4   | 9.69E+03 | 0.149 | POST TRANSLATIONAL PROTEIN MODIFICATION |
| <i>AGBL4</i>      | 10  | 1.43E+04 | 0.149 | POST TRANSLATIONAL PROTEIN MODIFICATION |
| <i>DNAJC3</i>     | 2   | 1.63E+03 | 0.151 | POST TRANSLATIONAL PROTEIN MODIFICATION |
| <i>SMC3</i>       | 3   | 1.59E+03 | 0.152 | POST TRANSLATIONAL PROTEIN MODIFICATION |
| <i>BTBD6</i>      | 4   | 8.20E+03 | 0.154 | POST TRANSLATIONAL PROTEIN MODIFICATION |
| <i>MDM2</i>       | 1   | 8.78E+02 | 0.156 | POST TRANSLATIONAL PROTEIN MODIFICATION |
| <i>MDGA2</i>      | 8   | 1.29E+04 | 0.157 | POST TRANSLATIONAL PROTEIN MODIFICATION |
| <i>TUBA8</i>      | 4   | 1.16E+04 | 0.157 | POST TRANSLATIONAL PROTEIN MODIFICATION |
| <i>RAB3B</i>      | 1   | 2.47E+02 | 0.157 | POST TRANSLATIONAL PROTEIN MODIFICATION |
| <i>DCTN4</i>      | 5   | 1.08E+04 | 0.159 | POST TRANSLATIONAL PROTEIN MODIFICATION |
| <i>APOA1</i>      | 3   | 2.38E+03 | 0.160 | POST TRANSLATIONAL PROTEIN MODIFICATION |
| <i>POMT2</i>      | 3   | 3.09E+03 | 0.160 | POST TRANSLATIONAL PROTEIN MODIFICATION |
| <i>CHD3</i>       | 9   | 1.46E+04 | 0.162 | POST TRANSLATIONAL PROTEIN MODIFICATION |
| <i>TFG</i>        | 1   | 1.70E+03 | 0.163 | POST TRANSLATIONAL PROTEIN MODIFICATION |
| <i>FKBP8</i>      | 2   | 7.87E+03 | 0.163 | POST TRANSLATIONAL PROTEIN MODIFICATION |
| <i>MBD1</i>       | 9   | 1.11E+04 | 0.164 | POST TRANSLATIONAL PROTEIN MODIFICATION |

|                  |     |          |       |                                         |
|------------------|-----|----------|-------|-----------------------------------------|
| <i>RNF185</i>    | 2   | 3.37E+03 | 0.164 | POST TRANSLATIONAL PROTEIN MODIFICATION |
| <i>FBXW7</i>     | 1   | 3.72E+02 | 0.166 | POST TRANSLATIONAL PROTEIN MODIFICATION |
| <i>ANKRD28</i>   | 11  | 1.70E+04 | 0.167 | POST TRANSLATIONAL PROTEIN MODIFICATION |
| <i>KLHL5</i>     | 6   | 1.00E+04 | 0.168 | POST TRANSLATIONAL PROTEIN MODIFICATION |
| <i>APOA5</i>     | 1   | 8.75E+02 | 0.168 | POST TRANSLATIONAL PROTEIN MODIFICATION |
| <i>NUP88</i>     | 7   | 1.35E+04 | 0.169 | POST TRANSLATIONAL PROTEIN MODIFICATION |
| <i>RAB4A</i>     | 1   | 1.18E+03 | 0.169 | POST TRANSLATIONAL PROTEIN MODIFICATION |
| <i>B3GLCT</i>    | 5   | 7.78E+03 | 0.171 | POST TRANSLATIONAL PROTEIN MODIFICATION |
| <i>MGAT4B</i>    | 6   | 2.03E+04 | 0.171 | POST TRANSLATIONAL PROTEIN MODIFICATION |
| <i>TRAPPC4</i>   | 1   | 8.59E+02 | 0.171 | POST TRANSLATIONAL PROTEIN MODIFICATION |
| <i>RARA</i>      | 2   | 8.08E+02 | 0.174 | POST TRANSLATIONAL PROTEIN MODIFICATION |
| <i>RAB5A</i>     | 1   | 4.72E+02 | 0.174 | POST TRANSLATIONAL PROTEIN MODIFICATION |
| <i>UCHL1</i>     | 2   | 2.11E+03 | 0.174 | POST TRANSLATIONAL PROTEIN MODIFICATION |
| <i>COPA</i>      | 5   | 2.91E+03 | 0.178 | POST TRANSLATIONAL PROTEIN MODIFICATION |
| <i>RAB32</i>     | 4   | 2.02E+03 | 0.179 | POST TRANSLATIONAL PROTEIN MODIFICATION |
| <i>COG7</i>      | 6   | 6.85E+03 | 0.179 | POST TRANSLATIONAL PROTEIN MODIFICATION |
| <i>INO80B</i>    | 2   | 1.01E+03 | 0.179 | POST TRANSLATIONAL PROTEIN MODIFICATION |
| <i>PUM2</i>      | 3   | 5.04E+03 | 0.180 | POST TRANSLATIONAL PROTEIN MODIFICATION |
| <i>SPTAN1</i>    | 7   | 9.73E+03 | 0.184 | POST TRANSLATIONAL PROTEIN MODIFICATION |
| <i>RAE1</i>      | 3   | 1.19E+04 | 0.185 | POST TRANSLATIONAL PROTEIN MODIFICATION |
| <i>COMMD1</i>    | 1   | 6.58E+03 | 0.186 | POST TRANSLATIONAL PROTEIN MODIFICATION |
| <i>POM121C</i>   | 24  | 4.47E+04 | 0.186 | POST TRANSLATIONAL PROTEIN MODIFICATION |
| <i>HIST1H2AH</i> | 1   | 4.43E+03 | 0.189 | POST TRANSLATIONAL PROTEIN MODIFICATION |
| <i>FOXL2</i>     | 5   | 9.96E+03 | 0.189 | POST TRANSLATIONAL PROTEIN MODIFICATION |
| <i>IFIH1</i>     | 18  | 3.25E+04 | 0.190 | POST TRANSLATIONAL PROTEIN MODIFICATION |
| <i>ALG12</i>     | 2   | 4.93E+03 | 0.190 | POST TRANSLATIONAL PROTEIN MODIFICATION |
| <i>THSD1</i>     | 6   | 1.44E+04 | 0.191 | POST TRANSLATIONAL PROTEIN MODIFICATION |
| <i>HIST1H2AI</i> | 1   | 7.34E+02 | 0.193 | POST TRANSLATIONAL PROTEIN MODIFICATION |
| <i>CTBP1</i>     | 3   | 9.89E+02 | 0.194 | POST TRANSLATIONAL PROTEIN MODIFICATION |
| <i>ZRANB1</i>    | 3   | 1.82E+03 | 0.194 | POST TRANSLATIONAL PROTEIN MODIFICATION |
| <i>LARGE1</i>    | 5   | 9.48E+03 | 0.195 | POST TRANSLATIONAL PROTEIN MODIFICATION |
| <i>RAB3C</i>     | 1   | 2.88E+02 | 0.196 | POST TRANSLATIONAL PROTEIN MODIFICATION |
| <i>METTL22</i>   | 3   | 5.81E+03 | 0.196 | POST TRANSLATIONAL PROTEIN MODIFICATION |
| <i>HIST3H2A</i>  | 1   | 4.51E+02 | 0.197 | POST TRANSLATIONAL PROTEIN MODIFICATION |
| <i>FBXO32</i>    | 2   | 1.26E+03 | 0.197 | POST TRANSLATIONAL PROTEIN MODIFICATION |
| <i>B4GALT5</i>   | 1   | 6.10E+03 | 0.198 | POST TRANSLATIONAL PROTEIN MODIFICATION |
| <i>NDC1</i>      | 3   | 9.43E+03 | 0.200 | POST TRANSLATIONAL PROTEIN MODIFICATION |
| <i>PEX2</i>      | 6   | 1.49E+04 | 0.201 | POST TRANSLATIONAL PROTEIN MODIFICATION |
| <i>ASB1</i>      | 1   | 4.19E+02 | 0.201 | POST TRANSLATIONAL PROTEIN MODIFICATION |
| <i>SBSPO</i>     | 2   | 2.70E+03 | 0.202 | POST TRANSLATIONAL PROTEIN MODIFICATION |
| <i>ADAM10</i>    | 2   | 1.51E+03 | 0.202 | POST TRANSLATIONAL PROTEIN MODIFICATION |
| <i>TRAPPC6B</i>  | 1   | 7.57E+02 | 0.203 | POST TRANSLATIONAL PROTEIN MODIFICATION |
| <i>INO80</i>     | 11  | 2.11E+04 | 0.203 | POST TRANSLATIONAL PROTEIN MODIFICATION |
| <i>APLP2</i>     | 6   | 3.94E+03 | 0.205 | POST TRANSLATIONAL PROTEIN MODIFICATION |
| <i>ALG14</i>     | 4   | 9.85E+03 | 0.206 | POST TRANSLATIONAL PROTEIN MODIFICATION |
| <i>CNTN4</i>     | 6   | 4.65E+03 | 0.206 | POST TRANSLATIONAL PROTEIN MODIFICATION |
| <i>FBXO15</i>    | 2   | 8.31E+02 | 0.206 | POST TRANSLATIONAL PROTEIN MODIFICATION |
| <i>VDAC3</i>     | 3   | 3.66E+03 | 0.206 | POST TRANSLATIONAL PROTEIN MODIFICATION |
| <i>HLTF</i>      | 9   | 1.87E+04 | 0.209 | POST TRANSLATIONAL PROTEIN MODIFICATION |
| <i>USP10</i>     | 8   | 1.30E+04 | 0.210 | POST TRANSLATIONAL PROTEIN MODIFICATION |
| <i>SMURF2</i>    | 3   | 9.38E+03 | 0.212 | POST TRANSLATIONAL PROTEIN MODIFICATION |
| <i>ADAMTS14</i>  | 20  | 1.77E+04 | 0.212 | POST TRANSLATIONAL PROTEIN MODIFICATION |
| <i>DCTN6</i>     | 1   | 9.42E+02 | 0.212 | POST TRANSLATIONAL PROTEIN MODIFICATION |
| <i>UHRF2</i>     | 3   | 6.42E+03 | 0.212 | POST TRANSLATIONAL PROTEIN MODIFICATION |
| <i>ADAMTSL3</i>  | 23  | 3.19E+04 | 0.213 | POST TRANSLATIONAL PROTEIN MODIFICATION |
| <i>VCAN</i>      | 28  | 5.06E+04 | 0.214 | POST TRANSLATIONAL PROTEIN MODIFICATION |
| <i>BIRC2</i>     | 1   | 1.56E+03 | 0.217 | POST TRANSLATIONAL PROTEIN MODIFICATION |
| <i>USP21</i>     | 5   | 1.18E+04 | 0.218 | POST TRANSLATIONAL PROTEIN MODIFICATION |
| <i>RHOT1</i>     | 3   | 1.46E+03 | 0.219 | POST TRANSLATIONAL PROTEIN MODIFICATION |
| <i>POM121</i>    | 22  | 3.63E+04 | 0.219 | POST TRANSLATIONAL PROTEIN MODIFICATION |
| <i>GOLGB1</i>    | 31  | 3.79E+04 | 0.219 | POST TRANSLATIONAL PROTEIN MODIFICATION |
| <i>CHST4</i>     | 5   | 1.40E+04 | 0.220 | POST TRANSLATIONAL PROTEIN MODIFICATION |
| <i>MUC5B</i>     | 234 | 3.54E+05 | 0.221 | POST TRANSLATIONAL PROTEIN MODIFICATION |
| <i>ULBP2</i>     | 3   | 1.85E+03 | 0.224 | POST TRANSLATIONAL PROTEIN MODIFICATION |
| <i>PML</i>       | 14  | 1.70E+04 | 0.224 | POST TRANSLATIONAL PROTEIN MODIFICATION |
| <i>CTR9</i>      | 5   | 5.64E+03 | 0.225 | POST TRANSLATIONAL PROTEIN MODIFICATION |
| <i>SMAD3</i>     | 1   | 5.08E+02 | 0.227 | POST TRANSLATIONAL PROTEIN MODIFICATION |
| <i>MGAT3</i>     | 6   | 6.56E+03 | 0.227 | POST TRANSLATIONAL PROTEIN MODIFICATION |
| <i>RAB27A</i>    | 6   | 1.83E+03 | 0.227 | POST TRANSLATIONAL PROTEIN MODIFICATION |
| <i>DNMT3A</i>    | 5   | 4.10E+03 | 0.228 | POST TRANSLATIONAL PROTEIN MODIFICATION |
| <i>DCTN5</i>     | 1   | 2.97E+02 | 0.228 | POST TRANSLATIONAL PROTEIN MODIFICATION |
| <i>AGBL2</i>     | 7   | 1.51E+04 | 0.229 | POST TRANSLATIONAL PROTEIN MODIFICATION |
| <i>RAB19</i>     | 1   | 2.88E+02 | 0.231 | POST TRANSLATIONAL PROTEIN MODIFICATION |
| <i>ADAMTS2</i>   | 17  | 3.35E+04 | 0.231 | POST TRANSLATIONAL PROTEIN MODIFICATION |

|                  |    |          |       |                                         |
|------------------|----|----------|-------|-----------------------------------------|
| <i>USP34</i>     | 16 | 2.90E+04 | 0.232 | POST TRANSLATIONAL PROTEIN MODIFICATION |
| <i>ASB13</i>     | 2  | 7.27E+02 | 0.232 | POST TRANSLATIONAL PROTEIN MODIFICATION |
| <i>KAT2A</i>     | 5  | 3.10E+03 | 0.234 | POST TRANSLATIONAL PROTEIN MODIFICATION |
| <i>MUC6</i>      | 40 | 7.95E+04 | 0.234 | POST TRANSLATIONAL PROTEIN MODIFICATION |
| <i>USP42</i>     | 24 | 3.77E+04 | 0.237 | POST TRANSLATIONAL PROTEIN MODIFICATION |
| <i>SELENOS</i>   | 4  | 2.36E+03 | 0.238 | POST TRANSLATIONAL PROTEIN MODIFICATION |
| <i>ADAMTS13</i>  | 17 | 1.81E+04 | 0.240 | POST TRANSLATIONAL PROTEIN MODIFICATION |
| <i>TNIP1</i>     | 6  | 1.05E+04 | 0.242 | POST TRANSLATIONAL PROTEIN MODIFICATION |
| <i>VCPIP1</i>    | 2  | 1.10E+03 | 0.244 | POST TRANSLATIONAL PROTEIN MODIFICATION |
| <i>FBXO7</i>     | 4  | 2.88E+03 | 0.245 | POST TRANSLATIONAL PROTEIN MODIFICATION |
| <i>ELOC</i>      | 1  | 2.61E+02 | 0.246 | POST TRANSLATIONAL PROTEIN MODIFICATION |
| <i>TGFBR2</i>    | 5  | 7.00E+03 | 0.247 | POST TRANSLATIONAL PROTEIN MODIFICATION |
| <i>VDAC1</i>     | 2  | 5.69E+02 | 0.247 | POST TRANSLATIONAL PROTEIN MODIFICATION |
| <i>ARSJ</i>      | 4  | 5.16E+03 | 0.247 | POST TRANSLATIONAL PROTEIN MODIFICATION |
| <i>KLHL2</i>     | 1  | 1.59E+03 | 0.248 | POST TRANSLATIONAL PROTEIN MODIFICATION |
| <i>GPAA1</i>     | 5  | 9.37E+03 | 0.248 | POST TRANSLATIONAL PROTEIN MODIFICATION |
| <i>PIGV</i>      | 4  | 5.19E+03 | 0.249 | POST TRANSLATIONAL PROTEIN MODIFICATION |
| <i>PPARGC1A</i>  | 3  | 4.03E+03 | 0.250 | POST TRANSLATIONAL PROTEIN MODIFICATION |
| <i>EPAS1</i>     | 6  | 1.52E+04 | 0.250 | POST TRANSLATIONAL PROTEIN MODIFICATION |
| <i>CST3</i>      | 1  | 4.78E+02 | 0.251 | POST TRANSLATIONAL PROTEIN MODIFICATION |
| <i>ADAMTSL1</i>  | 18 | 2.13E+04 | 0.252 | POST TRANSLATIONAL PROTEIN MODIFICATION |
| <i>ASB4</i>      | 3  | 1.16E+03 | 0.253 | POST TRANSLATIONAL PROTEIN MODIFICATION |
| <i>ASB10</i>     | 20 | 2.29E+04 | 0.253 | POST TRANSLATIONAL PROTEIN MODIFICATION |
| <i>DPH2</i>      | 3  | 1.36E+03 | 0.254 | POST TRANSLATIONAL PROTEIN MODIFICATION |
| <i>PEX13</i>     | 5  | 4.41E+03 | 0.255 | POST TRANSLATIONAL PROTEIN MODIFICATION |
| <i>BGLAP</i>     | 1  | 1.37E+03 | 0.256 | POST TRANSLATIONAL PROTEIN MODIFICATION |
| <i>METTL21A</i>  | 1  | 6.13E+02 | 0.258 | POST TRANSLATIONAL PROTEIN MODIFICATION |
| <i>TTLL10</i>    | 23 | 4.60E+04 | 0.260 | POST TRANSLATIONAL PROTEIN MODIFICATION |
| <i>PSCA</i>      | 2  | 5.56E+03 | 0.261 | POST TRANSLATIONAL PROTEIN MODIFICATION |
| <i>DYNC1I2</i>   | 4  | 9.48E+02 | 0.261 | POST TRANSLATIONAL PROTEIN MODIFICATION |
| <i>FURIN</i>     | 8  | 1.42E+04 | 0.262 | POST TRANSLATIONAL PROTEIN MODIFICATION |
| <i>F5</i>        | 40 | 4.85E+04 | 0.263 | POST TRANSLATIONAL PROTEIN MODIFICATION |
| <i>PIAS3</i>     | 3  | 7.08E+03 | 0.264 | POST TRANSLATIONAL PROTEIN MODIFICATION |
| <i>HIST1H2BI</i> | 2  | 1.64E+03 | 0.267 | POST TRANSLATIONAL PROTEIN MODIFICATION |
| <i>EEF2</i>      | 1  | 2.17E+02 | 0.267 | POST TRANSLATIONAL PROTEIN MODIFICATION |
| <i>ST8SIA5</i>   | 2  | 1.29E+03 | 0.267 | POST TRANSLATIONAL PROTEIN MODIFICATION |
| <i>HIST1H4L</i>  | 1  | 3.15E+03 | 0.268 | POST TRANSLATIONAL PROTEIN MODIFICATION |
| <i>TTLL1</i>     | 1  | 2.22E+02 | 0.268 | POST TRANSLATIONAL PROTEIN MODIFICATION |
| <i>LY6G6C</i>    | 3  | 8.31E+03 | 0.268 | POST TRANSLATIONAL PROTEIN MODIFICATION |
| <i>MUC21</i>     | 84 | 6.98E+05 | 0.268 | POST TRANSLATIONAL PROTEIN MODIFICATION |
| <i>PSMB6</i>     | 1  | 3.10E+03 | 0.270 | POST TRANSLATIONAL PROTEIN MODIFICATION |
| <i>LYPD6B</i>    | 1  | 1.20E+03 | 0.272 | POST TRANSLATIONAL PROTEIN MODIFICATION |
| <i>UBE2Z</i>     | 1  | 5.36E+02 | 0.272 | POST TRANSLATIONAL PROTEIN MODIFICATION |
| <i>NUP37</i>     | 1  | 3.70E+02 | 0.273 | POST TRANSLATIONAL PROTEIN MODIFICATION |
| <i>SPP1</i>      | 6  | 3.52E+03 | 0.274 | POST TRANSLATIONAL PROTEIN MODIFICATION |
| <i>FBXW5</i>     | 16 | 1.87E+04 | 0.274 | POST TRANSLATIONAL PROTEIN MODIFICATION |
| <i>DCUN1D4</i>   | 4  | 3.98E+03 | 0.276 | POST TRANSLATIONAL PROTEIN MODIFICATION |
| <i>TUBA1C</i>    | 2  | 6.49E+03 | 0.276 | POST TRANSLATIONAL PROTEIN MODIFICATION |
| <i>A4GNT</i>     | 5  | 3.94E+03 | 0.276 | POST TRANSLATIONAL PROTEIN MODIFICATION |
| <i>MEPE</i>      | 7  | 1.02E+04 | 0.277 | POST TRANSLATIONAL PROTEIN MODIFICATION |
| <i>GALNT1</i>    | 3  | 1.14E+03 | 0.277 | POST TRANSLATIONAL PROTEIN MODIFICATION |
| <i>FEM1B</i>     | 1  | 6.25E+02 | 0.280 | POST TRANSLATIONAL PROTEIN MODIFICATION |
| <i>RAB4B</i>     | 3  | 8.82E+02 | 0.281 | POST TRANSLATIONAL PROTEIN MODIFICATION |
| <i>MATN3</i>     | 6  | 1.36E+04 | 0.281 | POST TRANSLATIONAL PROTEIN MODIFICATION |
| <i>FBXL22</i>    | 7  | 1.05E+04 | 0.282 | POST TRANSLATIONAL PROTEIN MODIFICATION |
| <i>GORASP1</i>   | 8  | 2.49E+04 | 0.282 | POST TRANSLATIONAL PROTEIN MODIFICATION |
| <i>PIGF</i>      | 2  | 8.01E+03 | 0.282 | POST TRANSLATIONAL PROTEIN MODIFICATION |
| <i>AGBL1</i>     | 16 | 3.45E+04 | 0.283 | POST TRANSLATIONAL PROTEIN MODIFICATION |
| <i>ELOB</i>      | 1  | 3.42E+02 | 0.283 | POST TRANSLATIONAL PROTEIN MODIFICATION |
| <i>CAMKMT</i>    | 2  | 6.22E+02 | 0.283 | POST TRANSLATIONAL PROTEIN MODIFICATION |
| <i>TP53</i>      | 2  | 7.01E+02 | 0.284 | POST TRANSLATIONAL PROTEIN MODIFICATION |
| <i>DPH7</i>      | 4  | 8.52E+03 | 0.285 | POST TRANSLATIONAL PROTEIN MODIFICATION |
| <i>F10</i>       | 5  | 4.86E+03 | 0.285 | POST TRANSLATIONAL PROTEIN MODIFICATION |
| <i>BTRC</i>      | 3  | 1.17E+03 | 0.285 | POST TRANSLATIONAL PROTEIN MODIFICATION |
| <i>DHDDS</i>     | 2  | 1.39E+03 | 0.287 | POST TRANSLATIONAL PROTEIN MODIFICATION |
| <i>FEM1C</i>     | 1  | 4.06E+02 | 0.287 | POST TRANSLATIONAL PROTEIN MODIFICATION |
| <i>AAAS</i>      | 5  | 3.35E+03 | 0.287 | POST TRANSLATIONAL PROTEIN MODIFICATION |
| <i>ADAMTSL2</i>  | 12 | 1.78E+04 | 0.288 | POST TRANSLATIONAL PROTEIN MODIFICATION |
| <i>DCUN1D5</i>   | 1  | 6.90E+02 | 0.288 | POST TRANSLATIONAL PROTEIN MODIFICATION |
| <i>ASB5</i>      | 3  | 1.38E+03 | 0.288 | POST TRANSLATIONAL PROTEIN MODIFICATION |
| <i>CEACAM7</i>   | 3  | 4.25E+03 | 0.288 | POST TRANSLATIONAL PROTEIN MODIFICATION |
| <i>RRAGA</i>     | 1  | 1.60E+02 | 0.289 | POST TRANSLATIONAL PROTEIN MODIFICATION |
| <i>OTUB1</i>     | 1  | 3.02E+02 | 0.291 | POST TRANSLATIONAL PROTEIN MODIFICATION |
| <i>LY6G6D</i>    | 2  | 5.83E+02 | 0.291 | POST TRANSLATIONAL PROTEIN MODIFICATION |

|                  |     |          |       |                                         |
|------------------|-----|----------|-------|-----------------------------------------|
| <i>TMEM115</i>   | 2   | 7.51E+02 | 0.292 | POST TRANSLATIONAL PROTEIN MODIFICATION |
| <i>SEC22B</i>    | 1   | 1.94E+02 | 0.292 | POST TRANSLATIONAL PROTEIN MODIFICATION |
| <i>RING1</i>     | 3   | 2.73E+03 | 0.294 | POST TRANSLATIONAL PROTEIN MODIFICATION |
| <i>YY1</i>       | 3   | 3.08E+03 | 0.295 | POST TRANSLATIONAL PROTEIN MODIFICATION |
| <i>BARD1</i>     | 9   | 2.12E+04 | 0.296 | POST TRANSLATIONAL PROTEIN MODIFICATION |
| <i>SKP2</i>      | 2   | 4.24E+02 | 0.299 | POST TRANSLATIONAL PROTEIN MODIFICATION |
| <i>TUBB2B</i>    | 2   | 1.47E+03 | 0.301 | POST TRANSLATIONAL PROTEIN MODIFICATION |
| <i>PRKDC</i>     | 32  | 3.16E+04 | 0.301 | POST TRANSLATIONAL PROTEIN MODIFICATION |
| <i>SEC24D</i>    | 9   | 1.62E+04 | 0.302 | POST TRANSLATIONAL PROTEIN MODIFICATION |
| <i>HIST1H2BB</i> | 1   | 1.81E+02 | 0.305 | POST TRANSLATIONAL PROTEIN MODIFICATION |
| <i>NCOA2</i>     | 11  | 6.63E+03 | 0.305 | POST TRANSLATIONAL PROTEIN MODIFICATION |
| <i>ERCC8</i>     | 7   | 5.20E+03 | 0.305 | POST TRANSLATIONAL PROTEIN MODIFICATION |
| <i>NTNG1</i>     | 1   | 1.84E+02 | 0.305 | POST TRANSLATIONAL PROTEIN MODIFICATION |
| <i>RAB15</i>     | 2   | 5.18E+03 | 0.306 | POST TRANSLATIONAL PROTEIN MODIFICATION |
| <i>FBXO10</i>    | 6   | 4.16E+03 | 0.307 | POST TRANSLATIONAL PROTEIN MODIFICATION |
| <i>HIST1H4C</i>  | 1   | 3.67E+02 | 0.307 | POST TRANSLATIONAL PROTEIN MODIFICATION |
| <i>MUC5AC</i>    | 201 | 2.34E+05 | 0.307 | POST TRANSLATIONAL PROTEIN MODIFICATION |
| <i>DYNC11</i>    | 2   | 1.00E+03 | 0.308 | POST TRANSLATIONAL PROTEIN MODIFICATION |
| <i>USP2</i>      | 5   | 8.15E+03 | 0.308 | POST TRANSLATIONAL PROTEIN MODIFICATION |
| <i>LRR1</i>      | 3   | 4.98E+03 | 0.309 | POST TRANSLATIONAL PROTEIN MODIFICATION |
| <i>SEC23IP</i>   | 9   | 1.31E+04 | 0.310 | POST TRANSLATIONAL PROTEIN MODIFICATION |
| <i>CPM</i>       | 3   | 7.55E+03 | 0.310 | POST TRANSLATIONAL PROTEIN MODIFICATION |
| <i>B3GNT6</i>    | 7   | 6.21E+03 | 0.312 | POST TRANSLATIONAL PROTEIN MODIFICATION |
| <i>NR1H3</i>     | 3   | 2.30E+03 | 0.312 | POST TRANSLATIONAL PROTEIN MODIFICATION |
| <i>TFAP2B</i>    | 2   | 1.20E+03 | 0.313 | POST TRANSLATIONAL PROTEIN MODIFICATION |
| <i>FGF23</i>     | 2   | 8.34E+02 | 0.314 | POST TRANSLATIONAL PROTEIN MODIFICATION |
| <i>DCUN1D2</i>   | 5   | 2.09E+03 | 0.314 | POST TRANSLATIONAL PROTEIN MODIFICATION |
| <i>FOXK2</i>     | 11  | 1.16E+04 | 0.314 | POST TRANSLATIONAL PROTEIN MODIFICATION |
| <i>PGM3</i>      | 4   | 1.48E+03 | 0.315 | POST TRANSLATIONAL PROTEIN MODIFICATION |
| <i>MUC20</i>     | 14  | 2.38E+04 | 0.315 | POST TRANSLATIONAL PROTEIN MODIFICATION |
| <i>GALNTL5</i>   | 5   | 6.49E+03 | 0.317 | POST TRANSLATIONAL PROTEIN MODIFICATION |
| <i>C1GALT1</i>   | 3   | 1.46E+03 | 0.317 | POST TRANSLATIONAL PROTEIN MODIFICATION |
| <i>MUC13</i>     | 5   | 7.88E+03 | 0.317 | POST TRANSLATIONAL PROTEIN MODIFICATION |
| <i>SLC35C1</i>   | 1   | 2.24E+03 | 0.318 | POST TRANSLATIONAL PROTEIN MODIFICATION |
| <i>TADA3</i>     | 2   | 9.89E+02 | 0.318 | POST TRANSLATIONAL PROTEIN MODIFICATION |
| <i>FAM20A</i>    | 3   | 1.75E+03 | 0.319 | POST TRANSLATIONAL PROTEIN MODIFICATION |
| <i>TTLL7</i>     | 5   | 6.70E+03 | 0.320 | POST TRANSLATIONAL PROTEIN MODIFICATION |
| <i>PRMT3</i>     | 7   | 3.22E+03 | 0.321 | POST TRANSLATIONAL PROTEIN MODIFICATION |
| <i>RAB12</i>     | 1   | 5.41E+02 | 0.321 | POST TRANSLATIONAL PROTEIN MODIFICATION |
| <i>SMAD4</i>     | 3   | 1.81E+03 | 0.322 | POST TRANSLATIONAL PROTEIN MODIFICATION |
| <i>TOPORS</i>    | 10  | 2.12E+04 | 0.323 | POST TRANSLATIONAL PROTEIN MODIFICATION |
| <i>NOD2</i>      | 32  | 2.88E+04 | 0.323 | POST TRANSLATIONAL PROTEIN MODIFICATION |
| <i>TRAF2</i>     | 2   | 1.30E+03 | 0.323 | POST TRANSLATIONAL PROTEIN MODIFICATION |
| <i>LYPD8</i>     | 4   | 4.11E+03 | 0.323 | POST TRANSLATIONAL PROTEIN MODIFICATION |
| <i>RAB38</i>     | 4   | 8.72E+03 | 0.323 | POST TRANSLATIONAL PROTEIN MODIFICATION |
| <i>ASB15</i>     | 5   | 2.79E+03 | 0.324 | POST TRANSLATIONAL PROTEIN MODIFICATION |
| <i>NUP153</i>    | 21  | 2.59E+04 | 0.326 | POST TRANSLATIONAL PROTEIN MODIFICATION |
| <i>PIGG</i>      | 11  | 8.27E+03 | 0.327 | POST TRANSLATIONAL PROTEIN MODIFICATION |
| <i>FBXO4</i>     | 3   | 4.17E+03 | 0.329 | POST TRANSLATIONAL PROTEIN MODIFICATION |
| <i>KAT2B</i>     | 10  | 1.04E+04 | 0.330 | POST TRANSLATIONAL PROTEIN MODIFICATION |
| <i>SEC16A</i>    | 27  | 3.63E+04 | 0.330 | POST TRANSLATIONAL PROTEIN MODIFICATION |
| <i>CTSZ</i>      | 3   | 3.74E+03 | 0.331 | POST TRANSLATIONAL PROTEIN MODIFICATION |
| <i>RAB25</i>     | 4   | 4.99E+03 | 0.333 | POST TRANSLATIONAL PROTEIN MODIFICATION |
| <i>LAMB1</i>     | 13  | 2.20E+04 | 0.333 | POST TRANSLATIONAL PROTEIN MODIFICATION |
| <i>COMMD8</i>    | 2   | 4.33E+03 | 0.334 | POST TRANSLATIONAL PROTEIN MODIFICATION |
| <i>SEC24A</i>    | 7   | 5.44E+03 | 0.334 | POST TRANSLATIONAL PROTEIN MODIFICATION |
| <i>NCOR2</i>     | 31  | 3.07E+04 | 0.335 | POST TRANSLATIONAL PROTEIN MODIFICATION |
| <i>NTM</i>       | 5   | 1.40E+04 | 0.335 | POST TRANSLATIONAL PROTEIN MODIFICATION |
| <i>LSAMP</i>     | 1   | 1.81E+02 | 0.337 | POST TRANSLATIONAL PROTEIN MODIFICATION |
| <i>MDC1</i>      | 90  | 1.53E+05 | 0.338 | POST TRANSLATIONAL PROTEIN MODIFICATION |
| <i>ST8SIA6</i>   | 3   | 2.83E+03 | 0.339 | POST TRANSLATIONAL PROTEIN MODIFICATION |
| <i>ST3GAL4</i>   | 6   | 6.28E+03 | 0.341 | POST TRANSLATIONAL PROTEIN MODIFICATION |
| <i>UBXN7</i>     | 1   | 1.74E+03 | 0.341 | POST TRANSLATIONAL PROTEIN MODIFICATION |
| <i>TTLL11</i>    | 5   | 8.31E+03 | 0.342 | POST TRANSLATIONAL PROTEIN MODIFICATION |
| <i>SEC24B</i>    | 6   | 2.88E+03 | 0.343 | POST TRANSLATIONAL PROTEIN MODIFICATION |
| <i>RNF20</i>     | 2   | 1.95E+03 | 0.345 | POST TRANSLATIONAL PROTEIN MODIFICATION |
| <i>CD109</i>     | 19  | 3.65E+04 | 0.346 | POST TRANSLATIONAL PROTEIN MODIFICATION |
| <i>SPTBN4</i>    | 18  | 2.07E+04 | 0.348 | POST TRANSLATIONAL PROTEIN MODIFICATION |
| <i>FBXW2</i>     | 3   | 1.60E+03 | 0.348 | POST TRANSLATIONAL PROTEIN MODIFICATION |
| <i>NSMCE4A</i>   | 2   | 1.84E+03 | 0.348 | POST TRANSLATIONAL PROTEIN MODIFICATION |
| <i>RAB8B</i>     | 1   | 4.00E+02 | 0.349 | POST TRANSLATIONAL PROTEIN MODIFICATION |
| <i>TTL</i>       | 2   | 4.02E+03 | 0.349 | POST TRANSLATIONAL PROTEIN MODIFICATION |
| <i>CUL9</i>      | 26  | 5.49E+04 | 0.350 | POST TRANSLATIONAL PROTEIN MODIFICATION |
| <i>PSMC5</i>     | 1   | 2.08E+02 | 0.350 | POST TRANSLATIONAL PROTEIN MODIFICATION |

|                   |    |          |       |                                         |
|-------------------|----|----------|-------|-----------------------------------------|
| <i>TMED2</i>      | 1  | 2.34E+02 | 0.351 | POST TRANSLATIONAL PROTEIN MODIFICATION |
| <i>LYPD1</i>      | 6  | 7.61E+03 | 0.352 | POST TRANSLATIONAL PROTEIN MODIFICATION |
| <i>GALNT5</i>     | 13 | 1.71E+04 | 0.355 | POST TRANSLATIONAL PROTEIN MODIFICATION |
| <i>GALNT16</i>    | 7  | 4.41E+03 | 0.355 | POST TRANSLATIONAL PROTEIN MODIFICATION |
| <i>ADAMTS7</i>    | 49 | 5.90E+04 | 0.356 | POST TRANSLATIONAL PROTEIN MODIFICATION |
| <i>AMBN</i>       | 9  | 5.92E+03 | 0.357 | POST TRANSLATIONAL PROTEIN MODIFICATION |
| <i>TOMM70</i>     | 3  | 1.16E+03 | 0.357 | POST TRANSLATIONAL PROTEIN MODIFICATION |
| <i>CBX8</i>       | 4  | 8.69E+03 | 0.359 | POST TRANSLATIONAL PROTEIN MODIFICATION |
| <i>B3GNT2</i>     | 1  | 1.31E+03 | 0.361 | POST TRANSLATIONAL PROTEIN MODIFICATION |
| <i>HIC1</i>       | 8  | 1.56E+04 | 0.361 | POST TRANSLATIONAL PROTEIN MODIFICATION |
| <i>PDIA3</i>      | 4  | 2.46E+03 | 0.362 | POST TRANSLATIONAL PROTEIN MODIFICATION |
| <i>B3GNT8</i>     | 7  | 4.24E+03 | 0.364 | POST TRANSLATIONAL PROTEIN MODIFICATION |
| <i>FPGT</i>       | 5  | 4.58E+03 | 0.365 | POST TRANSLATIONAL PROTEIN MODIFICATION |
| <i>TSTA3</i>      | 5  | 1.74E+03 | 0.365 | POST TRANSLATIONAL PROTEIN MODIFICATION |
| <i>FBXL18</i>     | 6  | 9.68E+03 | 0.366 | POST TRANSLATIONAL PROTEIN MODIFICATION |
| <i>IGFBP5</i>     | 1  | 3.50E+02 | 0.368 | POST TRANSLATIONAL PROTEIN MODIFICATION |
| <i>LAMC1</i>      | 12 | 1.22E+04 | 0.369 | POST TRANSLATIONAL PROTEIN MODIFICATION |
| <i>MYSM1</i>      | 4  | 5.24E+03 | 0.369 | POST TRANSLATIONAL PROTEIN MODIFICATION |
| <i>NAE1</i>       | 2  | 6.58E+02 | 0.369 | POST TRANSLATIONAL PROTEIN MODIFICATION |
| <i>TNIP2</i>      | 7  | 8.26E+03 | 0.372 | POST TRANSLATIONAL PROTEIN MODIFICATION |
| <i>ADAMTS17</i>   | 14 | 9.24E+03 | 0.374 | POST TRANSLATIONAL PROTEIN MODIFICATION |
| <i>NUP133</i>     | 8  | 1.02E+04 | 0.375 | POST TRANSLATIONAL PROTEIN MODIFICATION |
| <i>DMP1</i>       | 10 | 8.86E+03 | 0.375 | POST TRANSLATIONAL PROTEIN MODIFICATION |
| <i>USP3</i>       | 1  | 2.80E+02 | 0.376 | POST TRANSLATIONAL PROTEIN MODIFICATION |
| <i>USP49</i>      | 4  | 2.39E+03 | 0.376 | POST TRANSLATIONAL PROTEIN MODIFICATION |
| <i>TF</i>         | 7  | 4.94E+03 | 0.377 | POST TRANSLATIONAL PROTEIN MODIFICATION |
| <i>DCAF5</i>      | 5  | 4.62E+03 | 0.382 | POST TRANSLATIONAL PROTEIN MODIFICATION |
| <i>GALNT8</i>     | 10 | 1.33E+04 | 0.382 | POST TRANSLATIONAL PROTEIN MODIFICATION |
| <i>SMC6</i>       | 3  | 8.16E+02 | 0.383 | POST TRANSLATIONAL PROTEIN MODIFICATION |
| <i>QSOX1</i>      | 7  | 1.18E+04 | 0.383 | POST TRANSLATIONAL PROTEIN MODIFICATION |
| <i>ADAMTS3</i>    | 14 | 1.80E+04 | 0.384 | POST TRANSLATIONAL PROTEIN MODIFICATION |
| <i>DDB1</i>       | 1  | 2.67E+02 | 0.384 | POST TRANSLATIONAL PROTEIN MODIFICATION |
| <i>DNMT3B</i>     | 7  | 7.20E+03 | 0.384 | POST TRANSLATIONAL PROTEIN MODIFICATION |
| <i>MBD5</i>       | 9  | 4.94E+03 | 0.385 | POST TRANSLATIONAL PROTEIN MODIFICATION |
| <i>UBXN1</i>      | 2  | 4.55E+03 | 0.387 | POST TRANSLATIONAL PROTEIN MODIFICATION |
| <i>USP37</i>      | 7  | 1.32E+04 | 0.387 | POST TRANSLATIONAL PROTEIN MODIFICATION |
| <i>PLAUR</i>      | 7  | 7.17E+03 | 0.389 | POST TRANSLATIONAL PROTEIN MODIFICATION |
| <i>SMC5</i>       | 7  | 3.04E+03 | 0.389 | POST TRANSLATIONAL PROTEIN MODIFICATION |
| <i>FN3K</i>       | 4  | 5.51E+03 | 0.391 | POST TRANSLATIONAL PROTEIN MODIFICATION |
| <i>MUC15</i>      | 4  | 4.94E+03 | 0.392 | POST TRANSLATIONAL PROTEIN MODIFICATION |
| <i>RFT1</i>       | 7  | 4.00E+03 | 0.395 | POST TRANSLATIONAL PROTEIN MODIFICATION |
| <i>PIGT</i>       | 7  | 1.21E+04 | 0.396 | POST TRANSLATIONAL PROTEIN MODIFICATION |
| <i>ST6GALNAC4</i> | 1  | 5.47E+02 | 0.399 | POST TRANSLATIONAL PROTEIN MODIFICATION |
| <i>SCG3</i>       | 1  | 1.28E+02 | 0.400 | POST TRANSLATIONAL PROTEIN MODIFICATION |
| <i>ZNF350</i>     | 6  | 4.58E+03 | 0.400 | POST TRANSLATIONAL PROTEIN MODIFICATION |
| <i>LYPD3</i>      | 4  | 3.96E+03 | 0.402 | POST TRANSLATIONAL PROTEIN MODIFICATION |
| <i>GANAB</i>      | 5  | 6.35E+03 | 0.403 | POST TRANSLATIONAL PROTEIN MODIFICATION |
| <i>CCDC8</i>      | 8  | 5.75E+03 | 0.405 | POST TRANSLATIONAL PROTEIN MODIFICATION |
| <i>B4GALT4</i>    | 3  | 3.04E+03 | 0.405 | POST TRANSLATIONAL PROTEIN MODIFICATION |
| <i>OPCML</i>      | 2  | 5.81E+02 | 0.405 | POST TRANSLATIONAL PROTEIN MODIFICATION |
| <i>NSF</i>        | 1  | 2.81E+02 | 0.406 | POST TRANSLATIONAL PROTEIN MODIFICATION |
| <i>HIPK2</i>      | 7  | 2.35E+03 | 0.406 | POST TRANSLATIONAL PROTEIN MODIFICATION |
| <i>CAPZB</i>      | 2  | 3.66E+03 | 0.406 | POST TRANSLATIONAL PROTEIN MODIFICATION |
| <i>SLC35A1</i>    | 2  | 1.90E+03 | 0.407 | POST TRANSLATIONAL PROTEIN MODIFICATION |
| <i>FBXO30</i>     | 2  | 4.60E+03 | 0.409 | POST TRANSLATIONAL PROTEIN MODIFICATION |
| <i>DHPS</i>       | 10 | 7.58E+03 | 0.411 | POST TRANSLATIONAL PROTEIN MODIFICATION |
| <i>EVA1A</i>      | 1  | 2.41E+02 | 0.412 | POST TRANSLATIONAL PROTEIN MODIFICATION |
| <i>POMGNT1</i>    | 5  | 7.54E+03 | 0.412 | POST TRANSLATIONAL PROTEIN MODIFICATION |
| <i>THSD4</i>      | 13 | 1.68E+04 | 0.413 | POST TRANSLATIONAL PROTEIN MODIFICATION |
| <i>PNPLA2</i>     | 10 | 1.22E+04 | 0.413 | POST TRANSLATIONAL PROTEIN MODIFICATION |
| <i>PSMB11</i>     | 7  | 1.01E+04 | 0.414 | POST TRANSLATIONAL PROTEIN MODIFICATION |
| <i>COPG2</i>      | 3  | 6.16E+03 | 0.414 | POST TRANSLATIONAL PROTEIN MODIFICATION |
| <i>LYPD2</i>      | 1  | 2.13E+02 | 0.415 | POST TRANSLATIONAL PROTEIN MODIFICATION |
| <i>PSMB9</i>      | 5  | 8.02E+03 | 0.415 | POST TRANSLATIONAL PROTEIN MODIFICATION |
| <i>INO80D</i>     | 8  | 1.13E+04 | 0.415 | POST TRANSLATIONAL PROTEIN MODIFICATION |
| <i>KDELR3</i>     | 2  | 1.72E+03 | 0.416 | POST TRANSLATIONAL PROTEIN MODIFICATION |
| <i>DDX58</i>      | 7  | 1.02E+04 | 0.417 | POST TRANSLATIONAL PROTEIN MODIFICATION |
| <i>NR1H2</i>      | 1  | 1.08E+02 | 0.417 | POST TRANSLATIONAL PROTEIN MODIFICATION |
| <i>UBE2M</i>      | 1  | 8.16E+02 | 0.418 | POST TRANSLATIONAL PROTEIN MODIFICATION |
| <i>PSMB1</i>      | 1  | 1.16E+02 | 0.419 | POST TRANSLATIONAL PROTEIN MODIFICATION |
| <i>DPH5</i>       | 2  | 6.78E+02 | 0.419 | POST TRANSLATIONAL PROTEIN MODIFICATION |
| <i>FBXW4</i>      | 3  | 1.15E+04 | 0.420 | POST TRANSLATIONAL PROTEIN MODIFICATION |
| <i>TUBA3C</i>     | 4  | 1.05E+04 | 0.420 | POST TRANSLATIONAL PROTEIN MODIFICATION |
| <i>CDKN2A</i>     | 2  | 1.50E+03 | 0.421 | POST TRANSLATIONAL PROTEIN MODIFICATION |

|                   |    |          |       |                                         |
|-------------------|----|----------|-------|-----------------------------------------|
| <i>RCN1</i>       | 3  | 4.27E+03 | 0.422 | POST TRANSLATIONAL PROTEIN MODIFICATION |
| <i>CFTR</i>       | 36 | 2.43E+04 | 0.422 | POST TRANSLATIONAL PROTEIN MODIFICATION |
| <i>PCGF2</i>      | 1  | 9.00E+01 | 0.422 | POST TRANSLATIONAL PROTEIN MODIFICATION |
| <i>ADAMTS20</i>   | 15 | 3.59E+04 | 0.423 | POST TRANSLATIONAL PROTEIN MODIFICATION |
| <i>DAG1</i>       | 7  | 9.44E+03 | 0.423 | POST TRANSLATIONAL PROTEIN MODIFICATION |
| <i>EEF1AKMT1</i>  | 5  | 2.07E+03 | 0.423 | POST TRANSLATIONAL PROTEIN MODIFICATION |
| <i>SHPRH</i>      | 14 | 8.64E+03 | 0.423 | POST TRANSLATIONAL PROTEIN MODIFICATION |
| <i>COMMD4</i>     | 2  | 5.55E+02 | 0.424 | POST TRANSLATIONAL PROTEIN MODIFICATION |
| <i>ADAMTS5</i>    | 4  | 1.05E+04 | 0.426 | POST TRANSLATIONAL PROTEIN MODIFICATION |
| <i>DPM1</i>       | 2  | 7.93E+02 | 0.426 | POST TRANSLATIONAL PROTEIN MODIFICATION |
| <i>B3GNT3</i>     | 5  | 9.31E+03 | 0.426 | POST TRANSLATIONAL PROTEIN MODIFICATION |
| <i>KCTD7</i>      | 1  | 3.17E+02 | 0.426 | POST TRANSLATIONAL PROTEIN MODIFICATION |
| <i>LTBP1</i>      | 23 | 3.47E+04 | 0.428 | POST TRANSLATIONAL PROTEIN MODIFICATION |
| <i>JOSD1</i>      | 2  | 5.11E+02 | 0.430 | POST TRANSLATIONAL PROTEIN MODIFICATION |
| <i>TNIP3</i>      | 3  | 9.39E+03 | 0.431 | POST TRANSLATIONAL PROTEIN MODIFICATION |
| <i>PSMB8</i>      | 4  | 5.06E+03 | 0.432 | POST TRANSLATIONAL PROTEIN MODIFICATION |
| <i>B4GALT2</i>    | 4  | 2.53E+03 | 0.433 | POST TRANSLATIONAL PROTEIN MODIFICATION |
| <i>AMTN</i>       | 3  | 4.48E+03 | 0.434 | POST TRANSLATIONAL PROTEIN MODIFICATION |
| <i>ART4</i>       | 2  | 1.25E+03 | 0.435 | POST TRANSLATIONAL PROTEIN MODIFICATION |
| <i>CANX</i>       | 4  | 3.11E+03 | 0.436 | POST TRANSLATIONAL PROTEIN MODIFICATION |
| <i>CHST10</i>     | 3  | 1.44E+03 | 0.437 | POST TRANSLATIONAL PROTEIN MODIFICATION |
| <i>ASB3</i>       | 10 | 1.05E+04 | 0.438 | POST TRANSLATIONAL PROTEIN MODIFICATION |
| <i>PIGH</i>       | 1  | 4.28E+02 | 0.438 | POST TRANSLATIONAL PROTEIN MODIFICATION |
| <i>PCSK9</i>      | 3  | 4.36E+03 | 0.439 | POST TRANSLATIONAL PROTEIN MODIFICATION |
| <i>SENP8</i>      | 2  | 9.30E+02 | 0.439 | POST TRANSLATIONAL PROTEIN MODIFICATION |
| <i>RNF123</i>     | 10 | 1.09E+04 | 0.440 | POST TRANSLATIONAL PROTEIN MODIFICATION |
| <i>NUP50</i>      | 2  | 8.84E+02 | 0.441 | POST TRANSLATIONAL PROTEIN MODIFICATION |
| <i>RAB17</i>      | 5  | 5.78E+03 | 0.441 | POST TRANSLATIONAL PROTEIN MODIFICATION |
| <i>GPLD1</i>      | 14 | 1.87E+04 | 0.444 | POST TRANSLATIONAL PROTEIN MODIFICATION |
| <i>MANEA</i>      | 5  | 2.17E+03 | 0.445 | POST TRANSLATIONAL PROTEIN MODIFICATION |
| <i>DOLPP1</i>     | 1  | 1.69E+02 | 0.446 | POST TRANSLATIONAL PROTEIN MODIFICATION |
| <i>PSMA6</i>      | 1  | 3.60E+02 | 0.447 | POST TRANSLATIONAL PROTEIN MODIFICATION |
| <i>ANK3</i>       | 34 | 3.47E+04 | 0.447 | POST TRANSLATIONAL PROTEIN MODIFICATION |
| <i>ALPL</i>       | 4  | 5.66E+03 | 0.447 | POST TRANSLATIONAL PROTEIN MODIFICATION |
| <i>IZUMO1R</i>    | 2  | 2.99E+03 | 0.448 | POST TRANSLATIONAL PROTEIN MODIFICATION |
| <i>PENK</i>       | 4  | 1.99E+03 | 0.448 | POST TRANSLATIONAL PROTEIN MODIFICATION |
| <i>ST6GALNAC2</i> | 4  | 2.46E+03 | 0.449 | POST TRANSLATIONAL PROTEIN MODIFICATION |
| <i>MBD6</i>       | 7  | 2.86E+03 | 0.449 | POST TRANSLATIONAL PROTEIN MODIFICATION |
| <i>SERPINC1</i>   | 4  | 3.08E+03 | 0.449 | POST TRANSLATIONAL PROTEIN MODIFICATION |
| <i>CBX2</i>       | 11 | 8.68E+03 | 0.451 | POST TRANSLATIONAL PROTEIN MODIFICATION |
| <i>GALNT11</i>    | 12 | 1.32E+04 | 0.452 | POST TRANSLATIONAL PROTEIN MODIFICATION |
| <i>SNX3</i>       | 1  | 1.36E+02 | 0.452 | POST TRANSLATIONAL PROTEIN MODIFICATION |
| <i>FBXL5</i>      | 3  | 7.38E+02 | 0.452 | POST TRANSLATIONAL PROTEIN MODIFICATION |
| <i>FBN1</i>       | 12 | 6.39E+03 | 0.452 | POST TRANSLATIONAL PROTEIN MODIFICATION |
| <i>PDIA6</i>      | 4  | 5.09E+03 | 0.453 | POST TRANSLATIONAL PROTEIN MODIFICATION |
| <i>RAD23A</i>     | 4  | 9.15E+03 | 0.454 | POST TRANSLATIONAL PROTEIN MODIFICATION |
| <i>CDH2</i>       | 4  | 3.76E+03 | 0.454 | POST TRANSLATIONAL PROTEIN MODIFICATION |
| <i>NUDT14</i>     | 6  | 4.09E+03 | 0.456 | POST TRANSLATIONAL PROTEIN MODIFICATION |
| <i>UCHL5</i>      | 5  | 5.41E+03 | 0.456 | POST TRANSLATIONAL PROTEIN MODIFICATION |
| <i>ADAMTS16</i>   | 19 | 2.24E+04 | 0.456 | POST TRANSLATIONAL PROTEIN MODIFICATION |
| <i>TTLL12</i>     | 8  | 6.07E+03 | 0.457 | POST TRANSLATIONAL PROTEIN MODIFICATION |
| <i>IGFBP1</i>     | 5  | 1.75E+03 | 0.457 | POST TRANSLATIONAL PROTEIN MODIFICATION |
| <i>SERPIND1</i>   | 6  | 7.11E+03 | 0.457 | POST TRANSLATIONAL PROTEIN MODIFICATION |
| <i>HLA-A</i>      | 11 | 1.78E+04 | 0.458 | POST TRANSLATIONAL PROTEIN MODIFICATION |
| <i>GRIA1</i>      | 2  | 1.90E+03 | 0.459 | POST TRANSLATIONAL PROTEIN MODIFICATION |
| <i>MAN2A2</i>     | 9  | 8.13E+03 | 0.459 | POST TRANSLATIONAL PROTEIN MODIFICATION |
| <i>TNKS2</i>      | 4  | 2.13E+03 | 0.460 | POST TRANSLATIONAL PROTEIN MODIFICATION |
| <i>RNF152</i>     | 3  | 5.62E+03 | 0.460 | POST TRANSLATIONAL PROTEIN MODIFICATION |
| <i>RTF1</i>       | 1  | 1.04E+02 | 0.460 | POST TRANSLATIONAL PROTEIN MODIFICATION |
| <i>B3GNT7</i>     | 3  | 1.61E+03 | 0.460 | POST TRANSLATIONAL PROTEIN MODIFICATION |
| <i>PAF1</i>       | 5  | 4.35E+03 | 0.461 | POST TRANSLATIONAL PROTEIN MODIFICATION |
| <i>PROS1</i>      | 8  | 5.86E+03 | 0.462 | POST TRANSLATIONAL PROTEIN MODIFICATION |
| <i>MSLN</i>       | 31 | 2.95E+04 | 0.462 | POST TRANSLATIONAL PROTEIN MODIFICATION |
| <i>PIGO</i>       | 6  | 4.27E+03 | 0.463 | POST TRANSLATIONAL PROTEIN MODIFICATION |
| <i>ANO8</i>       | 9  | 7.82E+03 | 0.463 | POST TRANSLATIONAL PROTEIN MODIFICATION |
| <i>ASB6</i>       | 4  | 1.04E+03 | 0.464 | POST TRANSLATIONAL PROTEIN MODIFICATION |
| <i>PSMD5</i>      | 6  | 6.49E+03 | 0.464 | POST TRANSLATIONAL PROTEIN MODIFICATION |
| <i>TOP1</i>       | 2  | 2.51E+03 | 0.464 | POST TRANSLATIONAL PROTEIN MODIFICATION |
| <i>ARCN1</i>      | 1  | 5.55E+01 | 0.466 | POST TRANSLATIONAL PROTEIN MODIFICATION |
| <i>POFUT2</i>     | 9  | 5.95E+03 | 0.466 | POST TRANSLATIONAL PROTEIN MODIFICATION |
| <i>EEF1AKMT2</i>  | 2  | 8.34E+02 | 0.466 | POST TRANSLATIONAL PROTEIN MODIFICATION |
| <i>RAB20</i>      | 2  | 7.85E+02 | 0.467 | POST TRANSLATIONAL PROTEIN MODIFICATION |
| <i>GALNT9</i>     | 3  | 5.46E+02 | 0.468 | POST TRANSLATIONAL PROTEIN MODIFICATION |
| <i>STAMBP</i>     | 1  | 5.19E+02 | 0.468 | POST TRANSLATIONAL PROTEIN MODIFICATION |

|          |    |          |       |                                         |
|----------|----|----------|-------|-----------------------------------------|
| DCUN1D3  | 2  | 3.84E+02 | 0.468 | POST TRANSLATIONAL PROTEIN MODIFICATION |
| RNF168   | 5  | 3.34E+03 | 0.469 | POST TRANSLATIONAL PROTEIN MODIFICATION |
| TFPT     | 2  | 3.43E+03 | 0.469 | POST TRANSLATIONAL PROTEIN MODIFICATION |
| IDE      | 3  | 1.10E+03 | 0.469 | POST TRANSLATIONAL PROTEIN MODIFICATION |
| SP3      | 3  | 2.56E+03 | 0.470 | POST TRANSLATIONAL PROTEIN MODIFICATION |
| AURKB    | 5  | 1.98E+03 | 0.470 | POST TRANSLATIONAL PROTEIN MODIFICATION |
| SCMH1    | 7  | 5.69E+03 | 0.471 | POST TRANSLATIONAL PROTEIN MODIFICATION |
| MUL1     | 4  | 5.01E+03 | 0.474 | POST TRANSLATIONAL PROTEIN MODIFICATION |
| B3GALNT2 | 5  | 2.84E+03 | 0.476 | POST TRANSLATIONAL PROTEIN MODIFICATION |
| ESR1     | 11 | 1.34E+04 | 0.476 | POST TRANSLATIONAL PROTEIN MODIFICATION |
| TUBB4A   | 1  | 4.61E+02 | 0.476 | POST TRANSLATIONAL PROTEIN MODIFICATION |
| FAM20C   | 6  | 6.76E+03 | 0.479 | POST TRANSLATIONAL PROTEIN MODIFICATION |
| UGGT1    | 7  | 3.83E+03 | 0.479 | POST TRANSLATIONAL PROTEIN MODIFICATION |
| RAD23B   | 1  | 2.06E+02 | 0.481 | POST TRANSLATIONAL PROTEIN MODIFICATION |
| RAB36    | 3  | 1.70E+03 | 0.481 | POST TRANSLATIONAL PROTEIN MODIFICATION |
| CP       | 9  | 8.01E+03 | 0.483 | POST TRANSLATIONAL PROTEIN MODIFICATION |
| ALG10    | 3  | 1.24E+03 | 0.483 | POST TRANSLATIONAL PROTEIN MODIFICATION |
| GPIHBP1  | 5  | 1.86E+03 | 0.483 | POST TRANSLATIONAL PROTEIN MODIFICATION |
| RAB33B   | 1  | 7.39E+02 | 0.483 | POST TRANSLATIONAL PROTEIN MODIFICATION |
| RAD21    | 1  | 6.46E+01 | 0.486 | POST TRANSLATIONAL PROTEIN MODIFICATION |
| ADAMTSL4 | 21 | 2.60E+04 | 0.487 | POST TRANSLATIONAL PROTEIN MODIFICATION |
| ACTR8    | 3  | 3.64E+03 | 0.487 | POST TRANSLATIONAL PROTEIN MODIFICATION |
| NFRKB    | 6  | 5.50E+03 | 0.487 | POST TRANSLATIONAL PROTEIN MODIFICATION |
| TULP4    | 19 | 1.30E+04 | 0.488 | POST TRANSLATIONAL PROTEIN MODIFICATION |
| B3GNT5   | 2  | 2.57E+03 | 0.491 | POST TRANSLATIONAL PROTEIN MODIFICATION |
| NAPG     | 3  | 1.57E+03 | 0.491 | POST TRANSLATIONAL PROTEIN MODIFICATION |
| PSMD7    | 3  | 1.22E+03 | 0.491 | POST TRANSLATIONAL PROTEIN MODIFICATION |
| NUP85    | 5  | 4.02E+03 | 0.492 | POST TRANSLATIONAL PROTEIN MODIFICATION |
| MYC      | 3  | 2.83E+03 | 0.492 | POST TRANSLATIONAL PROTEIN MODIFICATION |
| MOGS     | 10 | 1.44E+04 | 0.494 | POST TRANSLATIONAL PROTEIN MODIFICATION |
| TRIM25   | 8  | 3.12E+03 | 0.494 | POST TRANSLATIONAL PROTEIN MODIFICATION |
| ZNF131   | 3  | 1.68E+03 | 0.496 | POST TRANSLATIONAL PROTEIN MODIFICATION |
| FBXL14   | 4  | 3.54E+03 | 0.498 | POST TRANSLATIONAL PROTEIN MODIFICATION |
| MITF     | 3  | 1.49E+03 | 0.498 | POST TRANSLATIONAL PROTEIN MODIFICATION |
| RAET1G   | 5  | 7.11E+03 | 0.499 | POST TRANSLATIONAL PROTEIN MODIFICATION |
| P4HB     | 2  | 5.14E+02 | 0.499 | POST TRANSLATIONAL PROTEIN MODIFICATION |
| GAS6     | 9  | 3.88E+03 | 0.501 | POST TRANSLATIONAL PROTEIN MODIFICATION |
| HSPA8    | 1  | 7.27E+01 | 0.503 | POST TRANSLATIONAL PROTEIN MODIFICATION |
| SCFD1    | 4  | 4.76E+03 | 0.504 | POST TRANSLATIONAL PROTEIN MODIFICATION |
| CKAP4    | 7  | 5.12E+03 | 0.505 | POST TRANSLATIONAL PROTEIN MODIFICATION |
| RWDD3    | 3  | 2.73E+03 | 0.506 | POST TRANSLATIONAL PROTEIN MODIFICATION |
| ADAMTS12 | 13 | 9.22E+03 | 0.506 | POST TRANSLATIONAL PROTEIN MODIFICATION |
| MPDU1    | 2  | 6.44E+02 | 0.506 | POST TRANSLATIONAL PROTEIN MODIFICATION |
| CAPZA2   | 2  | 4.45E+02 | 0.506 | POST TRANSLATIONAL PROTEIN MODIFICATION |
| ETFB     | 4  | 3.83E+03 | 0.507 | POST TRANSLATIONAL PROTEIN MODIFICATION |
| PTEN     | 2  | 4.47E+02 | 0.508 | POST TRANSLATIONAL PROTEIN MODIFICATION |
| SPRN     | 2  | 8.51E+02 | 0.508 | POST TRANSLATIONAL PROTEIN MODIFICATION |
| WDR20    | 5  | 5.93E+03 | 0.511 | POST TRANSLATIONAL PROTEIN MODIFICATION |
| MIA3     | 19 | 1.60E+04 | 0.512 | POST TRANSLATIONAL PROTEIN MODIFICATION |
| PSMD8    | 3  | 5.62E+02 | 0.512 | POST TRANSLATIONAL PROTEIN MODIFICATION |
| FBXW10   | 13 | 1.84E+04 | 0.513 | POST TRANSLATIONAL PROTEIN MODIFICATION |
| PPARA    | 4  | 2.19E+03 | 0.513 | POST TRANSLATIONAL PROTEIN MODIFICATION |
| MAN2A1   | 6  | 1.54E+03 | 0.513 | POST TRANSLATIONAL PROTEIN MODIFICATION |
| DCAF11   | 3  | 2.59E+03 | 0.514 | POST TRANSLATIONAL PROTEIN MODIFICATION |
| FGA      | 7  | 1.83E+03 | 0.515 | POST TRANSLATIONAL PROTEIN MODIFICATION |
| GNE      | 3  | 8.75E+02 | 0.516 | POST TRANSLATIONAL PROTEIN MODIFICATION |
| RECK     | 8  | 6.71E+03 | 0.518 | POST TRANSLATIONAL PROTEIN MODIFICATION |
| RAB18    | 1  | 1.03E+02 | 0.518 | POST TRANSLATIONAL PROTEIN MODIFICATION |
| STAM     | 4  | 9.79E+02 | 0.518 | POST TRANSLATIONAL PROTEIN MODIFICATION |
| MDGA1    | 11 | 3.71E+03 | 0.519 | POST TRANSLATIONAL PROTEIN MODIFICATION |
| MGAT4A   | 5  | 3.88E+03 | 0.520 | POST TRANSLATIONAL PROTEIN MODIFICATION |
| RAB1A    | 1  | 1.38E+03 | 0.521 | POST TRANSLATIONAL PROTEIN MODIFICATION |
| ARSA     | 4  | 1.13E+03 | 0.522 | POST TRANSLATIONAL PROTEIN MODIFICATION |
| PSMB10   | 3  | 7.89E+02 | 0.522 | POST TRANSLATIONAL PROTEIN MODIFICATION |
| TGOLN2   | 16 | 2.38E+04 | 0.522 | POST TRANSLATIONAL PROTEIN MODIFICATION |
| CDC20    | 1  | 9.20E+02 | 0.522 | POST TRANSLATIONAL PROTEIN MODIFICATION |
| RAB31    | 1  | 1.86E+02 | 0.523 | POST TRANSLATIONAL PROTEIN MODIFICATION |
| LMAN1L   | 6  | 2.86E+03 | 0.524 | POST TRANSLATIONAL PROTEIN MODIFICATION |
| THSD7B   | 12 | 8.23E+03 | 0.525 | POST TRANSLATIONAL PROTEIN MODIFICATION |
| UBA3     | 1  | 7.33E+01 | 0.526 | POST TRANSLATIONAL PROTEIN MODIFICATION |
| COMMD3   | 2  | 3.24E+03 | 0.526 | POST TRANSLATIONAL PROTEIN MODIFICATION |
| TRAPPC10 | 7  | 3.67E+03 | 0.527 | POST TRANSLATIONAL PROTEIN MODIFICATION |
| RAB6A    | 1  | 1.01E+03 | 0.529 | POST TRANSLATIONAL PROTEIN MODIFICATION |
| ALB      | 4  | 1.14E+03 | 0.533 | POST TRANSLATIONAL PROTEIN MODIFICATION |

|                   |     |          |       |                                         |
|-------------------|-----|----------|-------|-----------------------------------------|
| <i>PRSS23</i>     | 11  | 1.17E+04 | 0.533 | POST TRANSLATIONAL PROTEIN MODIFICATION |
| <i>PTRH2</i>      | 1   | 8.90E+02 | 0.534 | POST TRANSLATIONAL PROTEIN MODIFICATION |
| <i>STC2</i>       | 2   | 8.54E+02 | 0.536 | POST TRANSLATIONAL PROTEIN MODIFICATION |
| <i>B3GNTL1</i>    | 5   | 3.51E+03 | 0.536 | POST TRANSLATIONAL PROTEIN MODIFICATION |
| <i>RAB11B</i>     | 1   | 9.50E+01 | 0.538 | POST TRANSLATIONAL PROTEIN MODIFICATION |
| <i>FBXO21</i>     | 1   | 7.50E+01 | 0.539 | POST TRANSLATIONAL PROTEIN MODIFICATION |
| <i>OTULIN</i>     | 4   | 2.78E+03 | 0.540 | POST TRANSLATIONAL PROTEIN MODIFICATION |
| <i>ART3</i>       | 4   | 2.28E+03 | 0.540 | POST TRANSLATIONAL PROTEIN MODIFICATION |
| <i>ADAMTS10</i>   | 15  | 9.74E+03 | 0.540 | POST TRANSLATIONAL PROTEIN MODIFICATION |
| <i>KLHL21</i>     | 2   | 2.49E+03 | 0.542 | POST TRANSLATIONAL PROTEIN MODIFICATION |
| <i>CCNA2</i>      | 2   | 2.97E+03 | 0.543 | POST TRANSLATIONAL PROTEIN MODIFICATION |
| <i>KTN1</i>       | 17  | 7.60E+03 | 0.543 | POST TRANSLATIONAL PROTEIN MODIFICATION |
| <i>PIGC</i>       | 5   | 2.98E+03 | 0.543 | POST TRANSLATIONAL PROTEIN MODIFICATION |
| <i>RANGAP1</i>    | 3   | 8.17E+02 | 0.546 | POST TRANSLATIONAL PROTEIN MODIFICATION |
| <i>RAB7B</i>      | 2   | 1.04E+03 | 0.546 | POST TRANSLATIONAL PROTEIN MODIFICATION |
| <i>MELTF</i>      | 15  | 2.00E+04 | 0.546 | POST TRANSLATIONAL PROTEIN MODIFICATION |
| <i>GALNT4</i>     | 7   | 5.31E+03 | 0.546 | POST TRANSLATIONAL PROTEIN MODIFICATION |
| <i>NUB1</i>       | 6   | 3.67E+03 | 0.548 | POST TRANSLATIONAL PROTEIN MODIFICATION |
| <i>CCNA1</i>      | 4   | 7.94E+02 | 0.548 | POST TRANSLATIONAL PROTEIN MODIFICATION |
| <i>PSMD9</i>      | 3   | 9.67E+02 | 0.549 | POST TRANSLATIONAL PROTEIN MODIFICATION |
| <i>RAD52</i>      | 3   | 1.14E+03 | 0.550 | POST TRANSLATIONAL PROTEIN MODIFICATION |
| <i>RAD18</i>      | 5   | 9.03E+02 | 0.551 | POST TRANSLATIONAL PROTEIN MODIFICATION |
| <i>DPH1</i>       | 9   | 1.11E+04 | 0.551 | POST TRANSLATIONAL PROTEIN MODIFICATION |
| <i>CLSPN</i>      | 8   | 7.17E+03 | 0.552 | POST TRANSLATIONAL PROTEIN MODIFICATION |
| <i>GALNT3</i>     | 3   | 2.64E+03 | 0.554 | POST TRANSLATIONAL PROTEIN MODIFICATION |
| <i>SPTBN1</i>     | 13  | 8.86E+03 | 0.555 | POST TRANSLATIONAL PROTEIN MODIFICATION |
| <i>APOA2</i>      | 1   | 1.53E+02 | 0.557 | POST TRANSLATIONAL PROTEIN MODIFICATION |
| <i>MBTPS1</i>     | 14  | 1.18E+04 | 0.560 | POST TRANSLATIONAL PROTEIN MODIFICATION |
| <i>NFKBIA</i>     | 1   | 7.31E+01 | 0.561 | POST TRANSLATIONAL PROTEIN MODIFICATION |
| <i>POMK</i>       | 6   | 1.15E+03 | 0.561 | POST TRANSLATIONAL PROTEIN MODIFICATION |
| <i>LRRC49</i>     | 10  | 4.54E+03 | 0.562 | POST TRANSLATIONAL PROTEIN MODIFICATION |
| <i>AREG</i>       | 1   | 1.33E+03 | 0.563 | POST TRANSLATIONAL PROTEIN MODIFICATION |
| <i>USP19</i>      | 10  | 4.29E+03 | 0.564 | POST TRANSLATIONAL PROTEIN MODIFICATION |
| <i>PMM2</i>       | 7   | 4.86E+03 | 0.567 | POST TRANSLATIONAL PROTEIN MODIFICATION |
| <i>ST6GALNAC5</i> | 2   | 1.51E+03 | 0.569 | POST TRANSLATIONAL PROTEIN MODIFICATION |
| <i>PROZ</i>       | 6   | 3.76E+03 | 0.569 | POST TRANSLATIONAL PROTEIN MODIFICATION |
| <i>ALG2</i>       | 4   | 2.48E+03 | 0.571 | POST TRANSLATIONAL PROTEIN MODIFICATION |
| <i>ARFGAP3</i>    | 8   | 1.41E+04 | 0.571 | POST TRANSLATIONAL PROTEIN MODIFICATION |
| <i>GCNT7</i>      | 1   | 8.23E+01 | 0.572 | POST TRANSLATIONAL PROTEIN MODIFICATION |
| <i>SIN3A</i>      | 1   | 3.38E+02 | 0.572 | POST TRANSLATIONAL PROTEIN MODIFICATION |
| <i>TBC1D20</i>    | 2   | 1.78E+03 | 0.573 | POST TRANSLATIONAL PROTEIN MODIFICATION |
| <i>HIST1H2AB</i>  | 1   | 6.33E+01 | 0.573 | POST TRANSLATIONAL PROTEIN MODIFICATION |
| <i>NUP98</i>      | 15  | 7.18E+03 | 0.574 | POST TRANSLATIONAL PROTEIN MODIFICATION |
| <i>WAC</i>        | 1   | 8.14E+01 | 0.574 | POST TRANSLATIONAL PROTEIN MODIFICATION |
| <i>PEX10</i>      | 3   | 1.43E+03 | 0.575 | POST TRANSLATIONAL PROTEIN MODIFICATION |
| <i>TOP2A</i>      | 10  | 9.53E+03 | 0.575 | POST TRANSLATIONAL PROTEIN MODIFICATION |
| <i>VHL</i>        | 4   | 3.46E+03 | 0.576 | POST TRANSLATIONAL PROTEIN MODIFICATION |
| <i>PRKCSH</i>     | 12  | 7.49E+03 | 0.576 | POST TRANSLATIONAL PROTEIN MODIFICATION |
| <i>MUC1</i>       | 19  | 1.78E+04 | 0.577 | POST TRANSLATIONAL PROTEIN MODIFICATION |
| <i>PSMC3</i>      | 1   | 3.75E+01 | 0.578 | POST TRANSLATIONAL PROTEIN MODIFICATION |
| <i>SAFB</i>       | 3   | 1.29E+03 | 0.579 | POST TRANSLATIONAL PROTEIN MODIFICATION |
| <i>IGFBP4</i>     | 2   | 2.32E+02 | 0.579 | POST TRANSLATIONAL PROTEIN MODIFICATION |
| <i>TMEM132A</i>   | 11  | 1.13E+04 | 0.580 | POST TRANSLATIONAL PROTEIN MODIFICATION |
| <i>WDR61</i>      | 1   | 1.01E+02 | 0.581 | POST TRANSLATIONAL PROTEIN MODIFICATION |
| <i>KBTBD13</i>    | 6   | 5.87E+03 | 0.582 | POST TRANSLATIONAL PROTEIN MODIFICATION |
| <i>SERPINA10</i>  | 7   | 6.11E+03 | 0.583 | POST TRANSLATIONAL PROTEIN MODIFICATION |
| <i>AGBL3</i>      | 14  | 1.63E+04 | 0.583 | POST TRANSLATIONAL PROTEIN MODIFICATION |
| <i>DOHH</i>       | 3   | 1.27E+03 | 0.584 | POST TRANSLATIONAL PROTEIN MODIFICATION |
| <i>MUC12</i>      | 169 | 2.73E+05 | 0.584 | POST TRANSLATIONAL PROTEIN MODIFICATION |
| <i>NRN1L</i>      | 3   | 7.04E+02 | 0.584 | POST TRANSLATIONAL PROTEIN MODIFICATION |
| <i>USP8</i>       | 3   | 3.01E+03 | 0.588 | POST TRANSLATIONAL PROTEIN MODIFICATION |
| <i>TECTB</i>      | 3   | 4.03E+03 | 0.589 | POST TRANSLATIONAL PROTEIN MODIFICATION |
| <i>MAN1A1</i>     | 3   | 2.12E+03 | 0.590 | POST TRANSLATIONAL PROTEIN MODIFICATION |
| <i>FN3KRP</i>     | 4   | 4.99E+03 | 0.590 | POST TRANSLATIONAL PROTEIN MODIFICATION |
| <i>FSTL3</i>      | 2   | 2.46E+03 | 0.593 | POST TRANSLATIONAL PROTEIN MODIFICATION |
| <i>EEF2KMT</i>    | 8   | 4.38E+03 | 0.594 | POST TRANSLATIONAL PROTEIN MODIFICATION |
| <i>TRIM27</i>     | 1   | 9.29E+01 | 0.594 | POST TRANSLATIONAL PROTEIN MODIFICATION |
| <i>USP28</i>      | 13  | 8.39E+03 | 0.594 | POST TRANSLATIONAL PROTEIN MODIFICATION |
| <i>B4GALNT2</i>   | 5   | 6.61E+03 | 0.595 | POST TRANSLATIONAL PROTEIN MODIFICATION |
| <i>KLHL22</i>     | 2   | 3.29E+02 | 0.595 | POST TRANSLATIONAL PROTEIN MODIFICATION |
| <i>TRAPPC1</i>    | 1   | 1.99E+01 | 0.595 | POST TRANSLATIONAL PROTEIN MODIFICATION |
| <i>USO1</i>       | 7   | 1.69E+03 | 0.595 | POST TRANSLATIONAL PROTEIN MODIFICATION |
| <i>CNTN5</i>      | 14  | 1.02E+04 | 0.596 | POST TRANSLATIONAL PROTEIN MODIFICATION |
| <i>B4GALT6</i>    | 1   | 7.97E+01 | 0.597 | POST TRANSLATIONAL PROTEIN MODIFICATION |

|                 |    |          |       |                                         |
|-----------------|----|----------|-------|-----------------------------------------|
| <i>PSMD11</i>   | 1  | 2.60E+01 | 0.598 | POST TRANSLATIONAL PROTEIN MODIFICATION |
| <i>SUMF2</i>    | 10 | 1.24E+04 | 0.598 | POST TRANSLATIONAL PROTEIN MODIFICATION |
| <i>PRSS41</i>   | 13 | 1.07E+04 | 0.600 | POST TRANSLATIONAL PROTEIN MODIFICATION |
| <i>HSP90B1</i>  | 4  | 3.90E+03 | 0.601 | POST TRANSLATIONAL PROTEIN MODIFICATION |
| <i>STAM2</i>    | 1  | 3.34E+02 | 0.601 | POST TRANSLATIONAL PROTEIN MODIFICATION |
| <i>AMFR</i>     | 2  | 4.94E+02 | 0.603 | POST TRANSLATIONAL PROTEIN MODIFICATION |
| <i>OTUD7B</i>   | 7  | 1.56E+03 | 0.603 | POST TRANSLATIONAL PROTEIN MODIFICATION |
| <i>SEL1L</i>    | 9  | 8.63E+03 | 0.603 | POST TRANSLATIONAL PROTEIN MODIFICATION |
| <i>ARSB</i>     | 4  | 2.85E+03 | 0.604 | POST TRANSLATIONAL PROTEIN MODIFICATION |
| <i>TP53BP1</i>  | 14 | 1.24E+04 | 0.604 | POST TRANSLATIONAL PROTEIN MODIFICATION |
| <i>IGFBP3</i>   | 3  | 3.62E+03 | 0.604 | POST TRANSLATIONAL PROTEIN MODIFICATION |
| <i>USP16</i>    | 5  | 1.34E+03 | 0.606 | POST TRANSLATIONAL PROTEIN MODIFICATION |
| <i>CISH</i>     | 4  | 1.26E+03 | 0.608 | POST TRANSLATIONAL PROTEIN MODIFICATION |
| <i>GALNT14</i>  | 11 | 1.23E+04 | 0.609 | POST TRANSLATIONAL PROTEIN MODIFICATION |
| <i>SEMA5B</i>   | 4  | 4.01E+03 | 0.610 | POST TRANSLATIONAL PROTEIN MODIFICATION |
| <i>VCPKMT</i>   | 4  | 1.80E+03 | 0.610 | POST TRANSLATIONAL PROTEIN MODIFICATION |
| <i>ANK2</i>     | 31 | 1.51E+04 | 0.612 | POST TRANSLATIONAL PROTEIN MODIFICATION |
| <i>EP300</i>    | 8  | 5.82E+03 | 0.612 | POST TRANSLATIONAL PROTEIN MODIFICATION |
| <i>FBXL13</i>   | 15 | 7.38E+03 | 0.613 | POST TRANSLATIONAL PROTEIN MODIFICATION |
| <i>TNFAIP3</i>  | 10 | 1.95E+03 | 0.614 | POST TRANSLATIONAL PROTEIN MODIFICATION |
| <i>GALNT17</i>  | 4  | 1.13E+03 | 0.615 | POST TRANSLATIONAL PROTEIN MODIFICATION |
| <i>COG2</i>     | 6  | 3.53E+03 | 0.615 | POST TRANSLATIONAL PROTEIN MODIFICATION |
| <i>ARRB2</i>    | 3  | 1.62E+03 | 0.616 | POST TRANSLATIONAL PROTEIN MODIFICATION |
| <i>PIGP</i>     | 4  | 4.68E+02 | 0.618 | POST TRANSLATIONAL PROTEIN MODIFICATION |
| <i>NUP188</i>   | 17 | 9.52E+03 | 0.618 | POST TRANSLATIONAL PROTEIN MODIFICATION |
| <i>IL33</i>     | 2  | 2.63E+02 | 0.620 | POST TRANSLATIONAL PROTEIN MODIFICATION |
| <i>ADAMTS18</i> | 22 | 1.73E+04 | 0.620 | POST TRANSLATIONAL PROTEIN MODIFICATION |
| <i>UFD1</i>     | 2  | 1.60E+03 | 0.622 | POST TRANSLATIONAL PROTEIN MODIFICATION |
| <i>COPZ2</i>    | 2  | 7.01E+02 | 0.623 | POST TRANSLATIONAL PROTEIN MODIFICATION |
| <i>SP100</i>    | 4  | 2.36E+03 | 0.624 | POST TRANSLATIONAL PROTEIN MODIFICATION |
| <i>HDAC2</i>    | 1  | 9.10E+01 | 0.625 | POST TRANSLATIONAL PROTEIN MODIFICATION |
| <i>GOSR2</i>    | 3  | 2.58E+03 | 0.625 | POST TRANSLATIONAL PROTEIN MODIFICATION |
| <i>BCL10</i>    | 1  | 7.88E+01 | 0.625 | POST TRANSLATIONAL PROTEIN MODIFICATION |
| <i>NR1I2</i>    | 3  | 2.07E+03 | 0.627 | POST TRANSLATIONAL PROTEIN MODIFICATION |
| <i>LMAN2</i>    | 3  | 1.56E+03 | 0.627 | POST TRANSLATIONAL PROTEIN MODIFICATION |
| <i>FUT8</i>     | 4  | 2.19E+03 | 0.627 | POST TRANSLATIONAL PROTEIN MODIFICATION |
| <i>ALG1</i>     | 9  | 3.80E+03 | 0.628 | POST TRANSLATIONAL PROTEIN MODIFICATION |
| <i>NUP43</i>    | 2  | 2.59E+02 | 0.628 | POST TRANSLATIONAL PROTEIN MODIFICATION |
| <i>CHST8</i>    | 6  | 2.75E+03 | 0.628 | POST TRANSLATIONAL PROTEIN MODIFICATION |
| <i>OS9</i>      | 7  | 7.48E+02 | 0.629 | POST TRANSLATIONAL PROTEIN MODIFICATION |
| <i>PSMB3</i>    | 1  | 5.09E+01 | 0.629 | POST TRANSLATIONAL PROTEIN MODIFICATION |
| <i>SPSB3</i>    | 4  | 3.38E+03 | 0.629 | POST TRANSLATIONAL PROTEIN MODIFICATION |
| <i>VDAC2</i>    | 1  | 4.55E+01 | 0.632 | POST TRANSLATIONAL PROTEIN MODIFICATION |
| <i>RAET1L</i>   | 7  | 3.94E+03 | 0.633 | POST TRANSLATIONAL PROTEIN MODIFICATION |
| <i>UBE2F</i>    | 2  | 3.64E+02 | 0.636 | POST TRANSLATIONAL PROTEIN MODIFICATION |
| <i>CALR</i>     | 5  | 1.10E+03 | 0.637 | POST TRANSLATIONAL PROTEIN MODIFICATION |
| <i>DNAJC24</i>  | 1  | 4.26E+02 | 0.638 | POST TRANSLATIONAL PROTEIN MODIFICATION |
| <i>TUBA3D</i>   | 1  | 6.84E+01 | 0.638 | POST TRANSLATIONAL PROTEIN MODIFICATION |
| <i>F7</i>       | 4  | 5.85E+02 | 0.639 | POST TRANSLATIONAL PROTEIN MODIFICATION |
| <i>CTSC</i>     | 5  | 8.46E+02 | 0.639 | POST TRANSLATIONAL PROTEIN MODIFICATION |
| <i>COPE</i>     | 5  | 1.64E+03 | 0.639 | POST TRANSLATIONAL PROTEIN MODIFICATION |
| <i>UBE2Q2</i>   | 3  | 1.37E+03 | 0.640 | POST TRANSLATIONAL PROTEIN MODIFICATION |
| <i>SEC23A</i>   | 3  | 5.92E+02 | 0.640 | POST TRANSLATIONAL PROTEIN MODIFICATION |
| <i>PIGN</i>     | 11 | 8.87E+03 | 0.641 | POST TRANSLATIONAL PROTEIN MODIFICATION |
| <i>DAD1</i>     | 1  | 1.27E+02 | 0.641 | POST TRANSLATIONAL PROTEIN MODIFICATION |
| <i>TTLL4</i>    | 14 | 6.59E+03 | 0.642 | POST TRANSLATIONAL PROTEIN MODIFICATION |
| <i>DCAF6</i>    | 5  | 2.21E+03 | 0.642 | POST TRANSLATIONAL PROTEIN MODIFICATION |
| <i>GOLGA2</i>   | 13 | 5.05E+03 | 0.643 | POST TRANSLATIONAL PROTEIN MODIFICATION |
| <i>ARSI</i>     | 5  | 8.40E+02 | 0.645 | POST TRANSLATIONAL PROTEIN MODIFICATION |
| <i>EDEM3</i>    | 6  | 1.02E+04 | 0.645 | POST TRANSLATIONAL PROTEIN MODIFICATION |
| <i>CUL4A</i>    | 5  | 2.87E+03 | 0.645 | POST TRANSLATIONAL PROTEIN MODIFICATION |
| <i>COMMD9</i>   | 3  | 5.13E+02 | 0.646 | POST TRANSLATIONAL PROTEIN MODIFICATION |
| <i>AURKA</i>    | 1  | 8.14E+02 | 0.647 | POST TRANSLATIONAL PROTEIN MODIFICATION |
| <i>PSME1</i>    | 2  | 1.21E+03 | 0.649 | POST TRANSLATIONAL PROTEIN MODIFICATION |
| <i>GALNT10</i>  | 3  | 4.01E+02 | 0.650 | POST TRANSLATIONAL PROTEIN MODIFICATION |
| <i>RNF40</i>    | 6  | 2.89E+03 | 0.651 | POST TRANSLATIONAL PROTEIN MODIFICATION |
| <i>CDC73</i>    | 2  | 4.90E+02 | 0.651 | POST TRANSLATIONAL PROTEIN MODIFICATION |
| <i>GGCX</i>     | 7  | 1.01E+03 | 0.651 | POST TRANSLATIONAL PROTEIN MODIFICATION |
| <i>CHML</i>     | 6  | 3.16E+03 | 0.652 | POST TRANSLATIONAL PROTEIN MODIFICATION |
| <i>GMPPA</i>    | 7  | 2.55E+03 | 0.652 | POST TRANSLATIONAL PROTEIN MODIFICATION |
| <i>TUBB6</i>    | 5  | 2.34E+03 | 0.653 | POST TRANSLATIONAL PROTEIN MODIFICATION |
| <i>PIGW</i>     | 4  | 2.30E+03 | 0.653 | POST TRANSLATIONAL PROTEIN MODIFICATION |
| <i>B4GALT3</i>  | 3  | 1.10E+03 | 0.655 | POST TRANSLATIONAL PROTEIN MODIFICATION |
| <i>BTBD1</i>    | 6  | 1.74E+03 | 0.658 | POST TRANSLATIONAL PROTEIN MODIFICATION |

|           |    |          |       |                                         |
|-----------|----|----------|-------|-----------------------------------------|
| SEC24C    | 11 | 7.28E+03 | 0.658 | POST TRANSLATIONAL PROTEIN MODIFICATION |
| NICN1     | 2  | 1.26E+03 | 0.659 | POST TRANSLATIONAL PROTEIN MODIFICATION |
| NTNG2     | 2  | 2.70E+03 | 0.659 | POST TRANSLATIONAL PROTEIN MODIFICATION |
| FEM1A     | 4  | 1.23E+03 | 0.659 | POST TRANSLATIONAL PROTEIN MODIFICATION |
| FBXL20    | 1  | 2.57E+02 | 0.660 | POST TRANSLATIONAL PROTEIN MODIFICATION |
| UIMC1     | 11 | 4.79E+03 | 0.660 | POST TRANSLATIONAL PROTEIN MODIFICATION |
| RNF144A   | 2  | 6.72E+02 | 0.661 | POST TRANSLATIONAL PROTEIN MODIFICATION |
| USP15     | 2  | 3.04E+02 | 0.661 | POST TRANSLATIONAL PROTEIN MODIFICATION |
| FUCA2     | 3  | 1.56E+03 | 0.661 | POST TRANSLATIONAL PROTEIN MODIFICATION |
| GCNT3     | 5  | 3.09E+03 | 0.661 | POST TRANSLATIONAL PROTEIN MODIFICATION |
| KDM1B     | 4  | 3.49E+03 | 0.661 | POST TRANSLATIONAL PROTEIN MODIFICATION |
| MEN1      | 2  | 2.04E+03 | 0.662 | POST TRANSLATIONAL PROTEIN MODIFICATION |
| POMT1     | 8  | 5.01E+03 | 0.663 | POST TRANSLATIONAL PROTEIN MODIFICATION |
| BABAM2    | 6  | 2.78E+03 | 0.664 | POST TRANSLATIONAL PROTEIN MODIFICATION |
| HIST1H2AD | 2  | 1.86E+02 | 0.665 | POST TRANSLATIONAL PROTEIN MODIFICATION |
| NEU4      | 11 | 7.75E+03 | 0.668 | POST TRANSLATIONAL PROTEIN MODIFICATION |
| MAT2B     | 2  | 2.58E+02 | 0.669 | POST TRANSLATIONAL PROTEIN MODIFICATION |
| GALNT18   | 13 | 7.30E+03 | 0.669 | POST TRANSLATIONAL PROTEIN MODIFICATION |
| NRIP1     | 18 | 1.11E+04 | 0.670 | POST TRANSLATIONAL PROTEIN MODIFICATION |
| CAPZA3    | 9  | 9.04E+03 | 0.673 | POST TRANSLATIONAL PROTEIN MODIFICATION |
| TTL8      | 13 | 7.16E+03 | 0.673 | POST TRANSLATIONAL PROTEIN MODIFICATION |
| PSMD1     | 6  | 1.26E+03 | 0.674 | POST TRANSLATIONAL PROTEIN MODIFICATION |
| RAB34     | 4  | 3.90E+03 | 0.674 | POST TRANSLATIONAL PROTEIN MODIFICATION |
| ASXL2     | 15 | 6.19E+03 | 0.676 | POST TRANSLATIONAL PROTEIN MODIFICATION |
| ST8SIA2   | 1  | 3.24E+01 | 0.676 | POST TRANSLATIONAL PROTEIN MODIFICATION |
| DCTN2     | 3  | 2.90E+02 | 0.676 | POST TRANSLATIONAL PROTEIN MODIFICATION |
| NAPA      | 2  | 4.76E+02 | 0.681 | POST TRANSLATIONAL PROTEIN MODIFICATION |
| SPON1     | 4  | 1.24E+03 | 0.682 | POST TRANSLATIONAL PROTEIN MODIFICATION |
| NSMCE1    | 1  | 5.50E+02 | 0.683 | POST TRANSLATIONAL PROTEIN MODIFICATION |
| MLEC      | 1  | 3.56E+01 | 0.683 | POST TRANSLATIONAL PROTEIN MODIFICATION |
| KBTBD8    | 2  | 4.03E+02 | 0.685 | POST TRANSLATIONAL PROTEIN MODIFICATION |
| OTOA      | 9  | 9.23E+03 | 0.687 | POST TRANSLATIONAL PROTEIN MODIFICATION |
| CUL2      | 2  | 1.01E+03 | 0.687 | POST TRANSLATIONAL PROTEIN MODIFICATION |
| ALG5      | 1  | 1.19E+02 | 0.688 | POST TRANSLATIONAL PROTEIN MODIFICATION |
| NR5A1     | 3  | 1.40E+03 | 0.688 | POST TRANSLATIONAL PROTEIN MODIFICATION |
| BMP4      | 3  | 3.64E+02 | 0.691 | POST TRANSLATIONAL PROTEIN MODIFICATION |
| NUP214    | 20 | 6.60E+03 | 0.691 | POST TRANSLATIONAL PROTEIN MODIFICATION |
| TRAPPC9   | 11 | 4.40E+03 | 0.691 | POST TRANSLATIONAL PROTEIN MODIFICATION |
| DCAF13    | 4  | 1.28E+03 | 0.692 | POST TRANSLATIONAL PROTEIN MODIFICATION |
| C3        | 10 | 2.84E+03 | 0.694 | POST TRANSLATIONAL PROTEIN MODIFICATION |
| ST3GAL5   | 3  | 1.80E+03 | 0.694 | POST TRANSLATIONAL PROTEIN MODIFICATION |
| MAP3K7    | 2  | 2.71E+02 | 0.694 | POST TRANSLATIONAL PROTEIN MODIFICATION |
| KBTBD7    | 2  | 4.72E+02 | 0.696 | POST TRANSLATIONAL PROTEIN MODIFICATION |
| NGLY1     | 5  | 6.36E+02 | 0.697 | POST TRANSLATIONAL PROTEIN MODIFICATION |
| BPIFB2    | 9  | 2.92E+03 | 0.697 | POST TRANSLATIONAL PROTEIN MODIFICATION |
| SEC31A    | 6  | 2.22E+03 | 0.697 | POST TRANSLATIONAL PROTEIN MODIFICATION |
| TPGS2     | 6  | 4.01E+03 | 0.699 | POST TRANSLATIONAL PROTEIN MODIFICATION |
| TDG       | 3  | 2.38E+03 | 0.702 | POST TRANSLATIONAL PROTEIN MODIFICATION |
| B3GNT4    | 4  | 1.39E+03 | 0.704 | POST TRANSLATIONAL PROTEIN MODIFICATION |
| USP48     | 6  | 3.05E+03 | 0.704 | POST TRANSLATIONAL PROTEIN MODIFICATION |
| CAPZA1    | 4  | 2.33E+03 | 0.706 | POST TRANSLATIONAL PROTEIN MODIFICATION |
| PRSS21    | 4  | 1.25E+03 | 0.707 | POST TRANSLATIONAL PROTEIN MODIFICATION |
| MFGE8     | 7  | 1.42E+03 | 0.707 | POST TRANSLATIONAL PROTEIN MODIFICATION |
| TRIM28    | 5  | 1.51E+03 | 0.707 | POST TRANSLATIONAL PROTEIN MODIFICATION |
| USP17L11  | 7  | 6.47E+03 | 0.708 | POST TRANSLATIONAL PROTEIN MODIFICATION |
| USP17L18  | 7  | 6.47E+03 | 0.708 | POST TRANSLATIONAL PROTEIN MODIFICATION |
| NSMCE3    | 7  | 4.64E+03 | 0.711 | POST TRANSLATIONAL PROTEIN MODIFICATION |
| UBE2S     | 3  | 1.73E+03 | 0.712 | POST TRANSLATIONAL PROTEIN MODIFICATION |
| INO80E    | 7  | 2.37E+03 | 0.716 | POST TRANSLATIONAL PROTEIN MODIFICATION |
| TRIM13    | 1  | 4.83E+02 | 0.716 | POST TRANSLATIONAL PROTEIN MODIFICATION |
| TMEM129   | 2  | 9.74E+02 | 0.717 | POST TRANSLATIONAL PROTEIN MODIFICATION |
| CTSA      | 3  | 6.21E+02 | 0.717 | POST TRANSLATIONAL PROTEIN MODIFICATION |
| RAB29     | 2  | 1.53E+03 | 0.718 | POST TRANSLATIONAL PROTEIN MODIFICATION |
| FBXO40    | 13 | 4.54E+03 | 0.719 | POST TRANSLATIONAL PROTEIN MODIFICATION |
| B3GNT9    | 2  | 3.86E+02 | 0.719 | POST TRANSLATIONAL PROTEIN MODIFICATION |
| MGAT4C    | 3  | 1.21E+03 | 0.721 | POST TRANSLATIONAL PROTEIN MODIFICATION |
| RNF103    | 9  | 4.69E+03 | 0.722 | POST TRANSLATIONAL PROTEIN MODIFICATION |
| USP33     | 2  | 3.48E+02 | 0.723 | POST TRANSLATIONAL PROTEIN MODIFICATION |
| ADAMTS15  | 9  | 3.59E+03 | 0.723 | POST TRANSLATIONAL PROTEIN MODIFICATION |
| UBD       | 1  | 3.97E+02 | 0.723 | POST TRANSLATIONAL PROTEIN MODIFICATION |
| PSME4     | 9  | 2.12E+03 | 0.724 | POST TRANSLATIONAL PROTEIN MODIFICATION |
| SPSB1     | 1  | 2.18E+01 | 0.725 | POST TRANSLATIONAL PROTEIN MODIFICATION |
| NEU3      | 6  | 2.67E+03 | 0.726 | POST TRANSLATIONAL PROTEIN MODIFICATION |
| COMMD5    | 2  | 8.29E+02 | 0.727 | POST TRANSLATIONAL PROTEIN MODIFICATION |

|          |    |          |       |                                         |
|----------|----|----------|-------|-----------------------------------------|
| NR5A2    | 1  | 6.90E+01 | 0.728 | POST TRANSLATIONAL PROTEIN MODIFICATION |
| PROC     | 3  | 1.56E+03 | 0.729 | POST TRANSLATIONAL PROTEIN MODIFICATION |
| UGGT2    | 18 | 6.41E+03 | 0.731 | POST TRANSLATIONAL PROTEIN MODIFICATION |
| LYPD4    | 3  | 1.12E+03 | 0.731 | POST TRANSLATIONAL PROTEIN MODIFICATION |
| ASB14    | 7  | 9.46E+02 | 0.732 | POST TRANSLATIONAL PROTEIN MODIFICATION |
| ALG9     | 6  | 1.10E+03 | 0.734 | POST TRANSLATIONAL PROTEIN MODIFICATION |
| ALG3     | 4  | 1.36E+03 | 0.734 | POST TRANSLATIONAL PROTEIN MODIFICATION |
| INO80C   | 6  | 1.62E+03 | 0.735 | POST TRANSLATIONAL PROTEIN MODIFICATION |
| GMPPB    | 2  | 1.41E+03 | 0.737 | POST TRANSLATIONAL PROTEIN MODIFICATION |
| PIGU     | 5  | 1.41E+03 | 0.737 | POST TRANSLATIONAL PROTEIN MODIFICATION |
| SERPINA1 | 11 | 4.48E+03 | 0.737 | POST TRANSLATIONAL PROTEIN MODIFICATION |
| MPI      | 4  | 1.30E+03 | 0.738 | POST TRANSLATIONAL PROTEIN MODIFICATION |
| RPA1     | 2  | 1.55E+02 | 0.740 | POST TRANSLATIONAL PROTEIN MODIFICATION |
| CUL7     | 14 | 7.10E+03 | 0.741 | POST TRANSLATIONAL PROTEIN MODIFICATION |
| PIGQ     | 10 | 2.83E+03 | 0.741 | POST TRANSLATIONAL PROTEIN MODIFICATION |
| USP12    | 1  | 2.36E+01 | 0.741 | POST TRANSLATIONAL PROTEIN MODIFICATION |
| COG1     | 11 | 9.35E+03 | 0.745 | POST TRANSLATIONAL PROTEIN MODIFICATION |
| GALNT15  | 1  | 3.22E+01 | 0.747 | POST TRANSLATIONAL PROTEIN MODIFICATION |
| ADAMTS6  | 9  | 3.14E+03 | 0.748 | POST TRANSLATIONAL PROTEIN MODIFICATION |
| USP47    | 8  | 1.83E+03 | 0.749 | POST TRANSLATIONAL PROTEIN MODIFICATION |
| UMOD     | 8  | 2.08E+03 | 0.749 | POST TRANSLATIONAL PROTEIN MODIFICATION |
| YKT6     | 3  | 3.95E+02 | 0.751 | POST TRANSLATIONAL PROTEIN MODIFICATION |
| GPS1     | 1  | 2.00E+01 | 0.752 | POST TRANSLATIONAL PROTEIN MODIFICATION |
| BAP1     | 1  | 9.38E+00 | 0.753 | POST TRANSLATIONAL PROTEIN MODIFICATION |
| GALNT12  | 6  | 2.82E+03 | 0.753 | POST TRANSLATIONAL PROTEIN MODIFICATION |
| RAB30    | 1  | 2.86E+01 | 0.753 | POST TRANSLATIONAL PROTEIN MODIFICATION |
| NUS1     | 2  | 2.10E+02 | 0.754 | POST TRANSLATIONAL PROTEIN MODIFICATION |
| CCP110   | 8  | 1.83E+03 | 0.755 | POST TRANSLATIONAL PROTEIN MODIFICATION |
| ACTR5    | 4  | 5.75E+03 | 0.755 | POST TRANSLATIONAL PROTEIN MODIFICATION |
| SMAD1    | 1  | 2.35E+01 | 0.756 | POST TRANSLATIONAL PROTEIN MODIFICATION |
| PIGL     | 4  | 1.48E+03 | 0.756 | POST TRANSLATIONAL PROTEIN MODIFICATION |
| MXRA8    | 6  | 3.95E+03 | 0.757 | POST TRANSLATIONAL PROTEIN MODIFICATION |
| NAGK     | 4  | 3.71E+02 | 0.757 | POST TRANSLATIONAL PROTEIN MODIFICATION |
| PSMD6    | 5  | 5.04E+02 | 0.757 | POST TRANSLATIONAL PROTEIN MODIFICATION |
| DCTN1    | 14 | 4.29E+03 | 0.758 | POST TRANSLATIONAL PROTEIN MODIFICATION |
| NUP160   | 13 | 4.12E+03 | 0.759 | POST TRANSLATIONAL PROTEIN MODIFICATION |
| DCAF8    | 1  | 1.62E+01 | 0.759 | POST TRANSLATIONAL PROTEIN MODIFICATION |
| RIPK2    | 1  | 3.60E+01 | 0.760 | POST TRANSLATIONAL PROTEIN MODIFICATION |
| PSMD13   | 3  | 1.26E+03 | 0.761 | POST TRANSLATIONAL PROTEIN MODIFICATION |
| DYNC1H1  | 7  | 1.68E+03 | 0.763 | POST TRANSLATIONAL PROTEIN MODIFICATION |
| TUBA4A   | 1  | 2.05E+01 | 0.764 | POST TRANSLATIONAL PROTEIN MODIFICATION |
| USP14    | 2  | 2.22E+02 | 0.764 | POST TRANSLATIONAL PROTEIN MODIFICATION |
| NUP62    | 2  | 6.58E+02 | 0.764 | POST TRANSLATIONAL PROTEIN MODIFICATION |
| LMAN2L   | 1  | 1.50E+01 | 0.764 | POST TRANSLATIONAL PROTEIN MODIFICATION |
| OTUD3    | 7  | 3.13E+03 | 0.765 | POST TRANSLATIONAL PROTEIN MODIFICATION |
| PARK7    | 3  | 8.53E+02 | 0.765 | POST TRANSLATIONAL PROTEIN MODIFICATION |
| GCNT1    | 3  | 1.57E+03 | 0.765 | POST TRANSLATIONAL PROTEIN MODIFICATION |
| PIGM     | 3  | 9.91E+02 | 0.766 | POST TRANSLATIONAL PROTEIN MODIFICATION |
| USP4     | 10 | 1.89E+03 | 0.768 | POST TRANSLATIONAL PROTEIN MODIFICATION |
| SPTB     | 27 | 4.35E+03 | 0.768 | POST TRANSLATIONAL PROTEIN MODIFICATION |
| MTA1     | 7  | 4.70E+03 | 0.769 | POST TRANSLATIONAL PROTEIN MODIFICATION |
| NR1H4    | 3  | 4.52E+02 | 0.769 | POST TRANSLATIONAL PROTEIN MODIFICATION |
| LAMB2    | 16 | 9.89E+03 | 0.770 | POST TRANSLATIONAL PROTEIN MODIFICATION |
| PREB     | 1  | 3.27E+01 | 0.770 | POST TRANSLATIONAL PROTEIN MODIFICATION |
| BABAM1   | 2  | 1.95E+02 | 0.771 | POST TRANSLATIONAL PROTEIN MODIFICATION |
| RABGGTA  | 6  | 1.12E+03 | 0.771 | POST TRANSLATIONAL PROTEIN MODIFICATION |
| DERL1    | 1  | 3.33E+01 | 0.772 | POST TRANSLATIONAL PROTEIN MODIFICATION |
| SENP2    | 1  | 9.02E+00 | 0.772 | POST TRANSLATIONAL PROTEIN MODIFICATION |
| CHGB     | 11 | 8.44E+03 | 0.773 | POST TRANSLATIONAL PROTEIN MODIFICATION |
| KBTBD6   | 2  | 2.27E+02 | 0.773 | POST TRANSLATIONAL PROTEIN MODIFICATION |
| GFPT2    | 5  | 4.66E+02 | 0.774 | POST TRANSLATIONAL PROTEIN MODIFICATION |
| TTLL2    | 13 | 3.57E+03 | 0.774 | POST TRANSLATIONAL PROTEIN MODIFICATION |
| RANBP2   | 36 | 1.23E+04 | 0.775 | POST TRANSLATIONAL PROTEIN MODIFICATION |
| LMAN1    | 2  | 3.58E+02 | 0.777 | POST TRANSLATIONAL PROTEIN MODIFICATION |
| HIF3A    | 8  | 4.06E+03 | 0.778 | POST TRANSLATIONAL PROTEIN MODIFICATION |
| FOXK1    | 6  | 4.98E+03 | 0.779 | POST TRANSLATIONAL PROTEIN MODIFICATION |
| OTUB2    | 2  | 1.09E+02 | 0.779 | POST TRANSLATIONAL PROTEIN MODIFICATION |
| LHB      | 3  | 1.75E+03 | 0.780 | POST TRANSLATIONAL PROTEIN MODIFICATION |
| VWA1     | 6  | 4.46E+03 | 0.780 | POST TRANSLATIONAL PROTEIN MODIFICATION |
| PIAS4    | 4  | 4.08E+02 | 0.781 | POST TRANSLATIONAL PROTEIN MODIFICATION |
| FBXO22   | 2  | 3.78E+02 | 0.782 | POST TRANSLATIONAL PROTEIN MODIFICATION |
| FBXO31   | 3  | 8.98E+02 | 0.783 | POST TRANSLATIONAL PROTEIN MODIFICATION |
| FN1      | 25 | 1.36E+04 | 0.783 | POST TRANSLATIONAL PROTEIN MODIFICATION |
| ATXN3    | 3  | 4.34E+02 | 0.784 | POST TRANSLATIONAL PROTEIN MODIFICATION |

|           |    |          |       |                                         |
|-----------|----|----------|-------|-----------------------------------------|
| MGAT5     | 5  | 4.79E+02 | 0.785 | POST TRANSLATIONAL PROTEIN MODIFICATION |
| BIRC3     | 3  | 8.71E+02 | 0.785 | POST TRANSLATIONAL PROTEIN MODIFICATION |
| SPARCL1   | 9  | 6.32E+02 | 0.786 | POST TRANSLATIONAL PROTEIN MODIFICATION |
| L3MBTL2   | 3  | 3.97E+02 | 0.787 | POST TRANSLATIONAL PROTEIN MODIFICATION |
| GOSR1     | 1  | 2.71E+01 | 0.789 | POST TRANSLATIONAL PROTEIN MODIFICATION |
| GALNT6    | 5  | 4.80E+02 | 0.790 | POST TRANSLATIONAL PROTEIN MODIFICATION |
| NANS      | 6  | 2.21E+03 | 0.791 | POST TRANSLATIONAL PROTEIN MODIFICATION |
| COPS4     | 1  | 1.40E+02 | 0.791 | POST TRANSLATIONAL PROTEIN MODIFICATION |
| ADAMTSL5  | 14 | 9.21E+03 | 0.792 | POST TRANSLATIONAL PROTEIN MODIFICATION |
| HERC2     | 29 | 4.79E+03 | 0.794 | POST TRANSLATIONAL PROTEIN MODIFICATION |
| ST8SIA1   | 3  | 5.17E+02 | 0.794 | POST TRANSLATIONAL PROTEIN MODIFICATION |
| KLHL20    | 3  | 2.74E+02 | 0.794 | POST TRANSLATIONAL PROTEIN MODIFICATION |
| POMGNT2   | 4  | 6.30E+02 | 0.795 | POST TRANSLATIONAL PROTEIN MODIFICATION |
| WFS1      | 34 | 6.87E+03 | 0.796 | POST TRANSLATIONAL PROTEIN MODIFICATION |
| ASB16     | 9  | 8.85E+03 | 0.798 | POST TRANSLATIONAL PROTEIN MODIFICATION |
| STAG1     | 4  | 7.47E+02 | 0.799 | POST TRANSLATIONAL PROTEIN MODIFICATION |
| ZBTB16    | 1  | 3.89E+01 | 0.799 | POST TRANSLATIONAL PROTEIN MODIFICATION |
| COPS7A    | 1  | 3.81E+01 | 0.800 | POST TRANSLATIONAL PROTEIN MODIFICATION |
| COG6      | 2  | 2.38E+02 | 0.802 | POST TRANSLATIONAL PROTEIN MODIFICATION |
| FOLR2     | 3  | 1.27E+02 | 0.803 | POST TRANSLATIONAL PROTEIN MODIFICATION |
| FBXL4     | 5  | 5.14E+02 | 0.803 | POST TRANSLATIONAL PROTEIN MODIFICATION |
| HIST1H2AK | 1  | 8.43E+01 | 0.804 | POST TRANSLATIONAL PROTEIN MODIFICATION |
| NEGR1     | 1  | 1.89E+02 | 0.804 | POST TRANSLATIONAL PROTEIN MODIFICATION |
| DAXX      | 2  | 1.01E+03 | 0.804 | POST TRANSLATIONAL PROTEIN MODIFICATION |
| OBSL1     | 20 | 1.79E+04 | 0.805 | POST TRANSLATIONAL PROTEIN MODIFICATION |
| TNKS      | 8  | 2.95E+03 | 0.806 | POST TRANSLATIONAL PROTEIN MODIFICATION |
| TRAF3     | 5  | 1.43E+03 | 0.807 | POST TRANSLATIONAL PROTEIN MODIFICATION |
| PEX5      | 4  | 2.12E+03 | 0.808 | POST TRANSLATIONAL PROTEIN MODIFICATION |
| TGFBR1    | 1  | 5.15E+01 | 0.809 | POST TRANSLATIONAL PROTEIN MODIFICATION |
| FBXL16    | 3  | 3.71E+02 | 0.812 | POST TRANSLATIONAL PROTEIN MODIFICATION |
| ASXL1     | 14 | 6.35E+03 | 0.812 | POST TRANSLATIONAL PROTEIN MODIFICATION |
| BIRC5     | 2  | 6.58E+02 | 0.813 | POST TRANSLATIONAL PROTEIN MODIFICATION |
| GCNT4     | 2  | 2.00E+02 | 0.814 | POST TRANSLATIONAL PROTEIN MODIFICATION |
| TUBA3E    | 6  | 1.15E+03 | 0.814 | POST TRANSLATIONAL PROTEIN MODIFICATION |
| RTN4RL2   | 3  | 1.29E+03 | 0.814 | POST TRANSLATIONAL PROTEIN MODIFICATION |
| FBXO41    | 12 | 4.92E+03 | 0.814 | POST TRANSLATIONAL PROTEIN MODIFICATION |
| SEC22C    | 4  | 7.97E+02 | 0.816 | POST TRANSLATIONAL PROTEIN MODIFICATION |
| NUP54     | 3  | 1.59E+02 | 0.817 | POST TRANSLATIONAL PROTEIN MODIFICATION |
| DDOST     | 5  | 1.20E+03 | 0.818 | POST TRANSLATIONAL PROTEIN MODIFICATION |
| RPS2      | 1  | 9.05E+00 | 0.820 | POST TRANSLATIONAL PROTEIN MODIFICATION |
| NUP205    | 10 | 5.21E+03 | 0.821 | POST TRANSLATIONAL PROTEIN MODIFICATION |
| APOE      | 4  | 4.35E+02 | 0.821 | POST TRANSLATIONAL PROTEIN MODIFICATION |
| ENAM      | 15 | 3.05E+03 | 0.822 | POST TRANSLATIONAL PROTEIN MODIFICATION |
| COG3      | 5  | 1.20E+03 | 0.822 | POST TRANSLATIONAL PROTEIN MODIFICATION |
| FBXL15    | 2  | 2.19E+02 | 0.822 | POST TRANSLATIONAL PROTEIN MODIFICATION |
| ADRM1     | 3  | 2.02E+03 | 0.823 | POST TRANSLATIONAL PROTEIN MODIFICATION |
| TUSC3     | 3  | 9.12E+02 | 0.823 | POST TRANSLATIONAL PROTEIN MODIFICATION |
| SUMO3     | 2  | 2.22E+03 | 0.824 | POST TRANSLATIONAL PROTEIN MODIFICATION |
| COL7A1    | 24 | 1.24E+04 | 0.824 | POST TRANSLATIONAL PROTEIN MODIFICATION |
| NFKB2     | 8  | 1.88E+03 | 0.825 | POST TRANSLATIONAL PROTEIN MODIFICATION |
| FGG       | 5  | 8.31E+02 | 0.825 | POST TRANSLATIONAL PROTEIN MODIFICATION |
| RAB5C     | 3  | 5.58E+02 | 0.825 | POST TRANSLATIONAL PROTEIN MODIFICATION |
| FBXO27    | 3  | 1.65E+02 | 0.828 | POST TRANSLATIONAL PROTEIN MODIFICATION |
| KLHL3     | 2  | 1.56E+02 | 0.828 | POST TRANSLATIONAL PROTEIN MODIFICATION |
| HRC       | 18 | 5.68E+03 | 0.828 | POST TRANSLATIONAL PROTEIN MODIFICATION |
| VNN3      | 2  | 1.45E+02 | 0.829 | POST TRANSLATIONAL PROTEIN MODIFICATION |
| TUBAL3    | 7  | 6.78E+02 | 0.831 | POST TRANSLATIONAL PROTEIN MODIFICATION |
| NUP155    | 8  | 5.63E+02 | 0.831 | POST TRANSLATIONAL PROTEIN MODIFICATION |
| NR4A2     | 1  | 7.56E+00 | 0.831 | POST TRANSLATIONAL PROTEIN MODIFICATION |
| YOD1      | 5  | 2.67E+02 | 0.831 | POST TRANSLATIONAL PROTEIN MODIFICATION |
| BLM       | 11 | 1.28E+03 | 0.832 | POST TRANSLATIONAL PROTEIN MODIFICATION |
| NOP58     | 2  | 2.79E+02 | 0.833 | POST TRANSLATIONAL PROTEIN MODIFICATION |
| MGAT2     | 3  | 3.43E+02 | 0.838 | POST TRANSLATIONAL PROTEIN MODIFICATION |
| DTL       | 2  | 4.99E+02 | 0.841 | POST TRANSLATIONAL PROTEIN MODIFICATION |
| SUZ12     | 5  | 1.86E+03 | 0.841 | POST TRANSLATIONAL PROTEIN MODIFICATION |
| UBA6      | 6  | 2.01E+03 | 0.841 | POST TRANSLATIONAL PROTEIN MODIFICATION |
| MAN1A2    | 2  | 3.68E+02 | 0.841 | POST TRANSLATIONAL PROTEIN MODIFICATION |
| RAB26     | 4  | 3.30E+02 | 0.842 | POST TRANSLATIONAL PROTEIN MODIFICATION |
| CEACAM5   | 9  | 3.12E+03 | 0.842 | POST TRANSLATIONAL PROTEIN MODIFICATION |
| RIPK1     | 3  | 3.52E+02 | 0.843 | POST TRANSLATIONAL PROTEIN MODIFICATION |
| SENP1     | 3  | 7.92E+02 | 0.843 | POST TRANSLATIONAL PROTEIN MODIFICATION |
| MDM4      | 5  | 4.00E+02 | 0.843 | POST TRANSLATIONAL PROTEIN MODIFICATION |
| TRAPPC2L  | 4  | 3.36E+03 | 0.843 | POST TRANSLATIONAL PROTEIN MODIFICATION |
| SEMA5A    | 7  | 3.01E+03 | 0.844 | POST TRANSLATIONAL PROTEIN MODIFICATION |

|            |    |          |       |                                         |
|------------|----|----------|-------|-----------------------------------------|
| LEO1       | 3  | 6.19E+02 | 0.844 | POST TRANSLATIONAL PROTEIN MODIFICATION |
| FBXO17     | 3  | 1.31E+02 | 0.844 | POST TRANSLATIONAL PROTEIN MODIFICATION |
| PSME3      | 1  | 7.83E+00 | 0.846 | POST TRANSLATIONAL PROTEIN MODIFICATION |
| ST6GALNAC3 | 4  | 1.22E+03 | 0.846 | POST TRANSLATIONAL PROTEIN MODIFICATION |
| SAE1       | 1  | 7.37E+00 | 0.847 | POST TRANSLATIONAL PROTEIN MODIFICATION |
| PSMD2      | 2  | 1.22E+02 | 0.847 | POST TRANSLATIONAL PROTEIN MODIFICATION |
| PHC2       | 6  | 5.22E+02 | 0.849 | POST TRANSLATIONAL PROTEIN MODIFICATION |
| TADA2B     | 1  | 1.13E+01 | 0.850 | POST TRANSLATIONAL PROTEIN MODIFICATION |
| NUP58      | 5  | 3.86E+02 | 0.850 | POST TRANSLATIONAL PROTEIN MODIFICATION |
| RAB42      | 3  | 3.06E+03 | 0.851 | POST TRANSLATIONAL PROTEIN MODIFICATION |
| CDCA8      | 1  | 3.18E+01 | 0.855 | POST TRANSLATIONAL PROTEIN MODIFICATION |
| TMED3      | 3  | 2.98E+02 | 0.858 | POST TRANSLATIONAL PROTEIN MODIFICATION |
| PIGB       | 1  | 5.52E+00 | 0.858 | POST TRANSLATIONAL PROTEIN MODIFICATION |
| GALNT7     | 5  | 3.31E+03 | 0.858 | POST TRANSLATIONAL PROTEIN MODIFICATION |
| SEC16B     | 14 | 3.71E+03 | 0.860 | POST TRANSLATIONAL PROTEIN MODIFICATION |
| PSMC1      | 1  | 4.42E+00 | 0.860 | POST TRANSLATIONAL PROTEIN MODIFICATION |
| BECN1      | 1  | 4.45E+01 | 0.861 | POST TRANSLATIONAL PROTEIN MODIFICATION |
| NAPB       | 1  | 2.77E+01 | 0.861 | POST TRANSLATIONAL PROTEIN MODIFICATION |
| VDR        | 2  | 1.41E+02 | 0.864 | POST TRANSLATIONAL PROTEIN MODIFICATION |
| RCE1       | 1  | 2.82E+01 | 0.865 | POST TRANSLATIONAL PROTEIN MODIFICATION |
| USP25      | 8  | 7.35E+02 | 0.866 | POST TRANSLATIONAL PROTEIN MODIFICATION |
| DCAF17     | 8  | 3.01E+03 | 0.867 | POST TRANSLATIONAL PROTEIN MODIFICATION |
| FUT3       | 16 | 2.16E+03 | 0.867 | POST TRANSLATIONAL PROTEIN MODIFICATION |
| IKBKE      | 6  | 3.17E+03 | 0.868 | POST TRANSLATIONAL PROTEIN MODIFICATION |
| PGAP1      | 8  | 9.41E+02 | 0.869 | POST TRANSLATIONAL PROTEIN MODIFICATION |
| SPTA1      | 44 | 1.36E+04 | 0.869 | POST TRANSLATIONAL PROTEIN MODIFICATION |
| PIGX       | 2  | 5.25E+01 | 0.872 | POST TRANSLATIONAL PROTEIN MODIFICATION |
| VGF        | 7  | 3.65E+02 | 0.876 | POST TRANSLATIONAL PROTEIN MODIFICATION |
| MVD        | 10 | 5.04E+02 | 0.876 | POST TRANSLATIONAL PROTEIN MODIFICATION |
| APC        | 32 | 3.44E+03 | 0.876 | POST TRANSLATIONAL PROTEIN MODIFICATION |
| PEX14      | 5  | 9.51E+02 | 0.876 | POST TRANSLATIONAL PROTEIN MODIFICATION |
| AMDHD2     | 10 | 1.37E+03 | 0.877 | POST TRANSLATIONAL PROTEIN MODIFICATION |
| ADAMTS8    | 9  | 1.66E+03 | 0.884 | POST TRANSLATIONAL PROTEIN MODIFICATION |
| MUCL1      | 1  | 6.17E+00 | 0.884 | POST TRANSLATIONAL PROTEIN MODIFICATION |
| ARSK       | 6  | 1.51E+03 | 0.887 | POST TRANSLATIONAL PROTEIN MODIFICATION |
| SEC13      | 1  | 5.26E+00 | 0.889 | POST TRANSLATIONAL PROTEIN MODIFICATION |
| HIST2H2BF  | 5  | 7.65E+02 | 0.889 | POST TRANSLATIONAL PROTEIN MODIFICATION |
| ALG10B     | 10 | 6.55E+03 | 0.889 | POST TRANSLATIONAL PROTEIN MODIFICATION |
| COG8       | 4  | 5.00E+02 | 0.891 | POST TRANSLATIONAL PROTEIN MODIFICATION |
| TRRAP      | 3  | 2.10E+02 | 0.891 | POST TRANSLATIONAL PROTEIN MODIFICATION |
| TTLL5      | 21 | 1.54E+03 | 0.891 | POST TRANSLATIONAL PROTEIN MODIFICATION |
| AXIN1      | 16 | 8.80E+03 | 0.891 | POST TRANSLATIONAL PROTEIN MODIFICATION |
| RAB37      | 13 | 1.37E+03 | 0.892 | POST TRANSLATIONAL PROTEIN MODIFICATION |
| FUCA1      | 4  | 5.41E+02 | 0.896 | POST TRANSLATIONAL PROTEIN MODIFICATION |
| FOLR1      | 1  | 1.99E+01 | 0.899 | POST TRANSLATIONAL PROTEIN MODIFICATION |
| WSB1       | 5  | 5.21E+02 | 0.899 | POST TRANSLATIONAL PROTEIN MODIFICATION |
| USP17L2    | 31 | 2.48E+03 | 0.901 | POST TRANSLATIONAL PROTEIN MODIFICATION |
| HIF1A      | 8  | 4.69E+03 | 0.901 | POST TRANSLATIONAL PROTEIN MODIFICATION |
| MUC7       | 16 | 8.56E+03 | 0.902 | POST TRANSLATIONAL PROTEIN MODIFICATION |
| WRN        | 16 | 1.89E+03 | 0.903 | POST TRANSLATIONAL PROTEIN MODIFICATION |
| INCENP     | 10 | 2.32E+03 | 0.904 | POST TRANSLATIONAL PROTEIN MODIFICATION |
| CD55       | 5  | 1.70E+02 | 0.906 | POST TRANSLATIONAL PROTEIN MODIFICATION |
| PSMB2      | 1  | 1.34E+01 | 0.906 | POST TRANSLATIONAL PROTEIN MODIFICATION |
| CNIH3      | 1  | 3.48E+00 | 0.907 | POST TRANSLATIONAL PROTEIN MODIFICATION |
| UCHL3      | 1  | 2.00E+00 | 0.917 | POST TRANSLATIONAL PROTEIN MODIFICATION |
| ANK1       | 20 | 1.01E+04 | 0.917 | POST TRANSLATIONAL PROTEIN MODIFICATION |
| TNC        | 24 | 2.05E+04 | 0.920 | POST TRANSLATIONAL PROTEIN MODIFICATION |
| DCTN3      | 1  | 1.52E+00 | 0.925 | POST TRANSLATIONAL PROTEIN MODIFICATION |
| PIGZ       | 14 | 5.61E+02 | 0.926 | POST TRANSLATIONAL PROTEIN MODIFICATION |
| SPTBN5     | 57 | 3.18E+04 | 0.928 | POST TRANSLATIONAL PROTEIN MODIFICATION |
| TRAPPC5    | 1  | 1.18E+00 | 0.935 | POST TRANSLATIONAL PROTEIN MODIFICATION |
| LY6H       | 1  | 1.39E+00 | 0.941 | POST TRANSLATIONAL PROTEIN MODIFICATION |
| PSMA4      | 1  | 6.70E-01 | 0.947 | POST TRANSLATIONAL PROTEIN MODIFICATION |
| THRA       | 1  | 8.38E-01 | 0.948 | POST TRANSLATIONAL PROTEIN MODIFICATION |
| FBXL19     | 1  | 6.26E+00 | 0.958 | POST TRANSLATIONAL PROTEIN MODIFICATION |
| PSME2      | 1  | 6.85E+00 | 0.964 | POST TRANSLATIONAL PROTEIN MODIFICATION |
| DPH3       | 1  | 3.33E-01 | 0.965 | POST TRANSLATIONAL PROTEIN MODIFICATION |
| SEC22A     | 1  | 2.38E-01 | 0.967 | POST TRANSLATIONAL PROTEIN MODIFICATION |
| ASB17      | 1  | 2.98E-01 | 0.970 | POST TRANSLATIONAL PROTEIN MODIFICATION |
| RAB6B      | 1  | 4.41E-01 | 0.975 | POST TRANSLATIONAL PROTEIN MODIFICATION |
| WDR5       | 1  | 7.75E-03 | 0.993 | POST TRANSLATIONAL PROTEIN MODIFICATION |
| UBE2J2     | 2  | 1.71E+01 | 1     | POST TRANSLATIONAL PROTEIN MODIFICATION |
| FBXO44     | 6  | 3.77E+03 | 1     | POST TRANSLATIONAL PROTEIN MODIFICATION |
| C4A        | 5  | 1.22E+02 | 1     | POST TRANSLATIONAL PROTEIN MODIFICATION |

|          |    |          |   |                                         |
|----------|----|----------|---|-----------------------------------------|
| LMO7     | 25 | 3.03E+02 | 1 | POST TRANSLATIONAL PROTEIN MODIFICATION |
| TTLL6    | 10 | 2.51E+03 | 1 | POST TRANSLATIONAL PROTEIN MODIFICATION |
| MCFD2    | 2  | 2.75E+02 | 1 | POST TRANSLATIONAL PROTEIN MODIFICATION |
| ST3GAL3  | 4  | 5.29E+02 | 1 | POST TRANSLATIONAL PROTEIN MODIFICATION |
| FBXO11   | 3  | 4.97E+02 | 1 | POST TRANSLATIONAL PROTEIN MODIFICATION |
| GALNT2   | 4  | 1.71E+02 | 1 | POST TRANSLATIONAL PROTEIN MODIFICATION |
| ASB18    | 7  | 1.14E+03 | 1 | POST TRANSLATIONAL PROTEIN MODIFICATION |
| UAP1     | 7  | 1.03E+03 | 1 | POST TRANSLATIONAL PROTEIN MODIFICATION |
| SHISA5   | 4  | 1.62E+02 | 1 | POST TRANSLATIONAL PROTEIN MODIFICATION |
| THRB     | 3  | 5.72E+01 | 1 | POST TRANSLATIONAL PROTEIN MODIFICATION |
| PGR      | 10 | 3.83E+03 | 1 | POST TRANSLATIONAL PROTEIN MODIFICATION |
| FSTL1    | 2  | 1.83E+01 | 1 | POST TRANSLATIONAL PROTEIN MODIFICATION |
| PMM1     | 5  | 1.29E+03 | 1 | POST TRANSLATIONAL PROTEIN MODIFICATION |
| USP44    | 5  | 2.90E+02 | 1 | POST TRANSLATIONAL PROTEIN MODIFICATION |
| PSMF1    | 7  | 1.61E+03 | 1 | POST TRANSLATIONAL PROTEIN MODIFICATION |
| NR3C2    | 2  | 1.91E+01 | 1 | POST TRANSLATIONAL PROTEIN MODIFICATION |
| FUOM     | 4  | 6.20E+00 | 1 | POST TRANSLATIONAL PROTEIN MODIFICATION |
| USP30    | 5  | 7.90E+02 | 1 | POST TRANSLATIONAL PROTEIN MODIFICATION |
| NR3C1    | 2  | 2.23E+02 | 1 | POST TRANSLATIONAL PROTEIN MODIFICATION |
| NCOA1    | 8  | 4.43E+02 | 1 | POST TRANSLATIONAL PROTEIN MODIFICATION |
| PHC3     | 7  | 2.20E+03 | 1 | POST TRANSLATIONAL PROTEIN MODIFICATION |
| NANP     | 2  | 1.18E+02 | 1 | POST TRANSLATIONAL PROTEIN MODIFICATION |
| RPN2     | 6  | 5.08E+01 | 1 | POST TRANSLATIONAL PROTEIN MODIFICATION |
| SOC55    | 4  | 3.35E+02 | 1 | POST TRANSLATIONAL PROTEIN MODIFICATION |
| ETFBKMT  | 3  | 8.56E+02 | 1 | POST TRANSLATIONAL PROTEIN MODIFICATION |
| SMAD7    | 2  | 6.06E+00 | 1 | POST TRANSLATIONAL PROTEIN MODIFICATION |
| NSMCE2   | 2  | 8.69E+01 | 1 | POST TRANSLATIONAL PROTEIN MODIFICATION |
| WSB2     | 2  | 5.70E+02 | 1 | POST TRANSLATIONAL PROTEIN MODIFICATION |
| GLB1     | 7  | 7.02E+02 | 1 | POST TRANSLATIONAL PROTEIN MODIFICATION |
| ALG11    | 10 | 3.49E+01 | 1 | POST TRANSLATIONAL PROTEIN MODIFICATION |
| PRND     | 3  | 1.80E+03 | 1 | POST TRANSLATIONAL PROTEIN MODIFICATION |
| OTUD7A   | 7  | 1.08E+03 | 1 | POST TRANSLATIONAL PROTEIN MODIFICATION |
| FCGR3B   | 2  | 2.55E+02 | 1 | POST TRANSLATIONAL PROTEIN MODIFICATION |
| KLHL41   | 5  | 2.15E+03 | 1 | POST TRANSLATIONAL PROTEIN MODIFICATION |
| GP2      | 7  | 1.28E+03 | 1 | POST TRANSLATIONAL PROTEIN MODIFICATION |
| ST3GAL6  | 3  | 1.19E+01 | 1 | POST TRANSLATIONAL PROTEIN MODIFICATION |
| SPP2     | 3  | 6.95E+01 | 1 | POST TRANSLATIONAL PROTEIN MODIFICATION |
| LGALS1   | 3  | 2.82E+02 | 1 | POST TRANSLATIONAL PROTEIN MODIFICATION |
| COPS7B   | 2  | 1.11E+02 | 1 | POST TRANSLATIONAL PROTEIN MODIFICATION |
| AHSG     | 3  | 1.48E+03 | 1 | POST TRANSLATIONAL PROTEIN MODIFICATION |
| ALG8     | 5  | 1.32E+03 | 1 | POST TRANSLATIONAL PROTEIN MODIFICATION |
| ACTL6A   | 2  | 4.31E+01 | 1 | POST TRANSLATIONAL PROTEIN MODIFICATION |
| PIAS2    | 3  | 5.78E+02 | 1 | POST TRANSLATIONAL PROTEIN MODIFICATION |
| GFPT1    | 2  | 1.41E+01 | 1 | POST TRANSLATIONAL PROTEIN MODIFICATION |
| AXIN2    | 10 | 1.64E+02 | 1 | POST TRANSLATIONAL PROTEIN MODIFICATION |
| KEAP1    | 2  | 2.22E+02 | 1 | POST TRANSLATIONAL PROTEIN MODIFICATION |
| PSMA8    | 4  | 5.16E+00 | 1 | POST TRANSLATIONAL PROTEIN MODIFICATION |
| ADAMTS9  | 16 | 3.32E+02 | 1 | POST TRANSLATIONAL PROTEIN MODIFICATION |
| DPAGT1   | 2  | 1.12E+02 | 1 | POST TRANSLATIONAL PROTEIN MODIFICATION |
| IGFBP7   | 3  | 1.04E+01 | 1 | POST TRANSLATIONAL PROTEIN MODIFICATION |
| UBE2C    | 2  | 3.77E+02 | 1 | POST TRANSLATIONAL PROTEIN MODIFICATION |
| EID3     | 4  | 2.86E+02 | 1 | POST TRANSLATIONAL PROTEIN MODIFICATION |
| USP13    | 9  | 2.93E+02 | 1 | POST TRANSLATIONAL PROTEIN MODIFICATION |
| PSMD3    | 2  | 7.88E+00 | 1 | POST TRANSLATIONAL PROTEIN MODIFICATION |
| USP18    | 3  | 1.07E+01 | 1 | POST TRANSLATIONAL PROTEIN MODIFICATION |
| TTLL3    | 12 | 2.63E+03 | 1 | POST TRANSLATIONAL PROTEIN MODIFICATION |
| THBS1    | 6  | 8.31E+02 | 1 | POST TRANSLATIONAL PROTEIN MODIFICATION |
| COPB1    | 6  | 1.14E+02 | 1 | POST TRANSLATIONAL PROTEIN MODIFICATION |
| AGTPBP1  | 6  | 3.63E+02 | 1 | POST TRANSLATIONAL PROTEIN MODIFICATION |
| VNN1     | 6  | 1.12E+02 | 1 | POST TRANSLATIONAL PROTEIN MODIFICATION |
| RAB40B   | 3  | 1.97E+02 | 1 | POST TRANSLATIONAL PROTEIN MODIFICATION |
| NOTUM    | 4  | 7.22E+02 | 1 | POST TRANSLATIONAL PROTEIN MODIFICATION |
| MAN1C1   | 3  | 2.76E+02 | 1 | POST TRANSLATIONAL PROTEIN MODIFICATION |
| STAMBPL1 | 5  | 9.31E+01 | 1 | POST TRANSLATIONAL PROTEIN MODIFICATION |
| PPP6R1   | 11 | 6.29E+03 | 1 | POST TRANSLATIONAL PROTEIN MODIFICATION |
| THBS2    | 12 | 3.37E+03 | 1 | POST TRANSLATIONAL PROTEIN MODIFICATION |
| LRRC41   | 6  | 2.88E+03 | 1 | POST TRANSLATIONAL PROTEIN MODIFICATION |
| FBXO2    | 3  | 3.07E+02 | 1 | POST TRANSLATIONAL PROTEIN MODIFICATION |
| HDAC7    | 15 | 2.61E+02 | 1 | POST TRANSLATIONAL PROTEIN MODIFICATION |
| TGFB1    | 2  | 2.82E+01 | 1 | POST TRANSLATIONAL PROTEIN MODIFICATION |
| TUBA4B   | 5  | 2.49E+02 | 1 | POST TRANSLATIONAL PROTEIN MODIFICATION |
| ALPI     | 4  | 6.26E+02 | 1 | POST TRANSLATIONAL PROTEIN MODIFICATION |
| LY6K     | 2  | 1.84E+01 | 1 | POST TRANSLATIONAL PROTEIN MODIFICATION |
| PIGS     | 6  | 1.75E+03 | 1 | POST TRANSLATIONAL PROTEIN MODIFICATION |

|                |   |          |   |                                         |
|----------------|---|----------|---|-----------------------------------------|
| <i>SPACA4</i>  | 2 | 1.75E+01 | 1 | POST TRANSLATIONAL PROTEIN MODIFICATION |
| <i>POLB</i>    | 3 | 1.15E+02 | 1 | POST TRANSLATIONAL PROTEIN MODIFICATION |
| <i>ADAMTS1</i> | 9 | 7.96E+02 | 1 | POST TRANSLATIONAL PROTEIN MODIFICATION |

| Gene         | NumVar | Q        | Pvalue | Gene-set                          |
|--------------|--------|----------|--------|-----------------------------------|
| <i>LRRK2</i> | 18     | 5.07E+04 | 0.016  | PTK6 PROMOTES HIF1A STABILIZATION |
| <i>HBEGF</i> | 1      | 3.11E+03 | 0.135  | PTK6 PROMOTES HIF1A STABILIZATION |
| <i>PTK6</i>  | 1      | 2.59E+02 | 0.243  | PTK6 PROMOTES HIF1A STABILIZATION |
| <i>EGFR</i>  | 6      | 1.87E+03 | 0.355  | PTK6 PROMOTES HIF1A STABILIZATION |
| <i>GPNMB</i> | 8      | 1.69E+04 | 0.370  | PTK6 PROMOTES HIF1A STABILIZATION |
| <i>HIF1A</i> | 8      | 4.69E+03 | 0.901  | PTK6 PROMOTES HIF1A STABILIZATION |

| Gene            | NumVar | Q        | Pvalue   | Gene-set          |
|-----------------|--------|----------|----------|-------------------|
| <i>DRD2</i>     | 13     | 5.66E+06 | 2.15E-10 | SIGNALING BY GPCR |
| <i>OR14C36</i>  | 3      | 4.36E+04 | 3.88E-04 | SIGNALING BY GPCR |
| <i>OR1J4</i>    | 2      | 4.62E+04 | 4.45E-04 | SIGNALING BY GPCR |
| <i>FFAR3</i>    | 14     | 3.28E+05 | 0.001    | SIGNALING BY GPCR |
| <i>RRH</i>      | 5      | 3.58E+04 | 0.001    | SIGNALING BY GPCR |
| <i>OR13F1</i>   | 4      | 4.37E+04 | 0.002    | SIGNALING BY GPCR |
| <i>GRK4</i>     | 9      | 5.41E+04 | 0.003    | SIGNALING BY GPCR |
| <i>OR52N2</i>   | 5      | 2.07E+04 | 0.004    | SIGNALING BY GPCR |
| <i>PRKCE</i>    | 3      | 2.09E+04 | 0.008    | SIGNALING BY GPCR |
| <i>OR1D5</i>    | 2      | 8.92E+03 | 0.008    | SIGNALING BY GPCR |
| <i>QRFPR</i>    | 8      | 1.58E+05 | 0.010    | SIGNALING BY GPCR |
| <i>OR2D3</i>    | 2      | 2.11E+04 | 0.010    | SIGNALING BY GPCR |
| <i>RDH5</i>     | 3      | 5.62E+03 | 0.011    | SIGNALING BY GPCR |
| <i>OR8B3</i>    | 4      | 8.11E+03 | 0.012    | SIGNALING BY GPCR |
| <i>WNT2</i>     | 4      | 2.90E+04 | 0.012    | SIGNALING BY GPCR |
| <i>OR6C76</i>   | 4      | 1.04E+04 | 0.014    | SIGNALING BY GPCR |
| <i>OR2V2</i>    | 4      | 2.33E+04 | 0.014    | SIGNALING BY GPCR |
| <i>OR51J1</i>   | 9      | 4.34E+04 | 0.014    | SIGNALING BY GPCR |
| <i>OR10H4</i>   | 8      | 3.90E+04 | 0.015    | SIGNALING BY GPCR |
| <i>OR51Q1</i>   | 10     | 7.81E+04 | 0.015    | SIGNALING BY GPCR |
| <i>RGS21</i>    | 3      | 2.74E+04 | 0.017    | SIGNALING BY GPCR |
| <i>OR10J5</i>   | 8      | 8.93E+03 | 0.017    | SIGNALING BY GPCR |
| <i>C5AR1</i>    | 7      | 4.11E+04 | 0.018    | SIGNALING BY GPCR |
| <i>OR56A4</i>   | 8      | 1.95E+04 | 0.018    | SIGNALING BY GPCR |
| <i>ADRA1D</i>   | 8      | 4.79E+04 | 0.019    | SIGNALING BY GPCR |
| <i>OR51L1</i>   | 4      | 3.44E+04 | 0.021    | SIGNALING BY GPCR |
| <i>APP</i>      | 2      | 3.42E+03 | 0.021    | SIGNALING BY GPCR |
| <i>GNAT2</i>    | 6      | 4.14E+04 | 0.021    | SIGNALING BY GPCR |
| <i>OR5M8</i>    | 7      | 3.13E+04 | 0.024    | SIGNALING BY GPCR |
| <i>OR1D2</i>    | 5      | 7.82E+03 | 0.025    | SIGNALING BY GPCR |
| <i>SSTR4</i>    | 6      | 1.98E+04 | 0.026    | SIGNALING BY GPCR |
| <i>FZD7</i>     | 1      | 1.47E+04 | 0.028    | SIGNALING BY GPCR |
| <i>GNG4</i>     | 1      | 4.00E+03 | 0.028    | SIGNALING BY GPCR |
| <i>OR4F17</i>   | 5      | 2.11E+04 | 0.028    | SIGNALING BY GPCR |
| <i>OR52N4</i>   | 6      | 2.73E+04 | 0.028    | SIGNALING BY GPCR |
| <i>PROK2</i>    | 2      | 1.68E+03 | 0.028    | SIGNALING BY GPCR |
| <i>OR10AG1</i>  | 4      | 1.30E+04 | 0.029    | SIGNALING BY GPCR |
| <i>TAS2R13</i>  | 1      | 2.03E+03 | 0.031    | SIGNALING BY GPCR |
| <i>RBP4</i>     | 1      | 3.06E+03 | 0.032    | SIGNALING BY GPCR |
| <i>ADM2</i>     | 4      | 6.37E+03 | 0.034    | SIGNALING BY GPCR |
| <i>RDH11</i>    | 2      | 1.79E+04 | 0.034    | SIGNALING BY GPCR |
| <i>MC4R</i>     | 5      | 4.32E+04 | 0.034    | SIGNALING BY GPCR |
| <i>OR52E4</i>   | 3      | 9.88E+03 | 0.035    | SIGNALING BY GPCR |
| <i>NMBR</i>     | 7      | 3.42E+04 | 0.037    | SIGNALING BY GPCR |
| <i>OR5K1</i>    | 7      | 2.14E+04 | 0.038    | SIGNALING BY GPCR |
| <i>OR2J2</i>    | 6      | 3.51E+04 | 0.039    | SIGNALING BY GPCR |
| <i>CXCL13</i>   | 1      | 5.44E+02 | 0.040    | SIGNALING BY GPCR |
| <i>OR2W1</i>    | 2      | 1.44E+04 | 0.041    | SIGNALING BY GPCR |
| <i>MLNR</i>     | 1      | 1.22E+04 | 0.042    | SIGNALING BY GPCR |
| <i>DAGLA</i>    | 4      | 1.02E+04 | 0.044    | SIGNALING BY GPCR |
| <i>RETSAT</i>   | 11     | 9.81E+04 | 0.045    | SIGNALING BY GPCR |
| <i>F2</i>       | 5      | 7.45E+03 | 0.047    | SIGNALING BY GPCR |
| <i>ARHGEF38</i> | 3      | 3.75E+03 | 0.052    | SIGNALING BY GPCR |
| <i>RGS13</i>    | 1      | 1.23E+03 | 0.052    | SIGNALING BY GPCR |
| <i>RGS4</i>     | 1      | 5.99E+02 | 0.054    | SIGNALING BY GPCR |
| <i>RBP1</i>     | 2      | 2.88E+03 | 0.055    | SIGNALING BY GPCR |
| <i>CCL25</i>    | 2      | 1.51E+04 | 0.055    | SIGNALING BY GPCR |
| <i>OR2A25</i>   | 5      | 9.09E+03 | 0.056    | SIGNALING BY GPCR |
| <i>OR2A12</i>   | 2      | 4.76E+03 | 0.057    | SIGNALING BY GPCR |
| <i>OR2M3</i>    | 7      | 1.98E+04 | 0.057    | SIGNALING BY GPCR |
| <i>APOA4</i>    | 9      | 2.92E+04 | 0.057    | SIGNALING BY GPCR |

|         |    |          |       |                   |
|---------|----|----------|-------|-------------------|
| ARHGEF4 | 29 | 5.93E+04 | 0.058 | SIGNALING BY GPCR |
| TAS2R39 | 4  | 1.10E+04 | 0.058 | SIGNALING BY GPCR |
| OR2C3   | 4  | 1.03E+04 | 0.059 | SIGNALING BY GPCR |
| INSL5   | 3  | 7.77E+03 | 0.060 | SIGNALING BY GPCR |
| GNG10   | 1  | 4.84E+03 | 0.060 | SIGNALING BY GPCR |
| AKR1C3  | 9  | 3.31E+04 | 0.060 | SIGNALING BY GPCR |
| OR5B2   | 3  | 2.83E+03 | 0.061 | SIGNALING BY GPCR |
| RLN2    | 6  | 1.71E+04 | 0.062 | SIGNALING BY GPCR |
| HSPG2   | 81 | 1.01E+05 | 0.064 | SIGNALING BY GPCR |
| APLNR   | 4  | 6.90E+03 | 0.065 | SIGNALING BY GPCR |
| GNAS    | 16 | 3.79E+04 | 0.066 | SIGNALING BY GPCR |
| GPHB5   | 3  | 1.53E+04 | 0.067 | SIGNALING BY GPCR |
| P2RY6   | 4  | 5.25E+03 | 0.068 | SIGNALING BY GPCR |
| OR5P3   | 5  | 3.51E+04 | 0.068 | SIGNALING BY GPCR |
| OR2W3   | 8  | 1.36E+04 | 0.068 | SIGNALING BY GPCR |
| CRHBP   | 3  | 5.16E+03 | 0.071 | SIGNALING BY GPCR |
| OR5H1   | 11 | 1.97E+04 | 0.072 | SIGNALING BY GPCR |
| OR52E5  | 4  | 1.80E+04 | 0.077 | SIGNALING BY GPCR |
| FGD2    | 14 | 2.82E+04 | 0.077 | SIGNALING BY GPCR |
| ITPR1   | 13 | 3.91E+04 | 0.079 | SIGNALING BY GPCR |
| OR8J1   | 5  | 2.84E+04 | 0.079 | SIGNALING BY GPCR |
| OR52B6  | 1  | 6.47E+02 | 0.080 | SIGNALING BY GPCR |
| ADCY6   | 12 | 4.54E+04 | 0.080 | SIGNALING BY GPCR |
| OR5T1   | 2  | 1.14E+03 | 0.081 | SIGNALING BY GPCR |
| OR2T33  | 13 | 3.25E+04 | 0.081 | SIGNALING BY GPCR |
| LPAR5   | 1  | 4.80E+02 | 0.082 | SIGNALING BY GPCR |
| NPBWR1  | 3  | 5.56E+03 | 0.083 | SIGNALING BY GPCR |
| OR4X1   | 8  | 3.09E+04 | 0.084 | SIGNALING BY GPCR |
| KNG1    | 2  | 3.00E+03 | 0.084 | SIGNALING BY GPCR |
| OR11H4  | 7  | 1.86E+04 | 0.085 | SIGNALING BY GPCR |
| TAAR9   | 5  | 8.59E+03 | 0.085 | SIGNALING BY GPCR |
| GHRHR   | 2  | 1.23E+04 | 0.088 | SIGNALING BY GPCR |
| CX3CL1  | 5  | 1.21E+04 | 0.088 | SIGNALING BY GPCR |
| CCR2    | 3  | 1.69E+03 | 0.088 | SIGNALING BY GPCR |
| CAMK2B  | 3  | 2.35E+03 | 0.089 | SIGNALING BY GPCR |
| OR51E2  | 4  | 1.60E+04 | 0.089 | SIGNALING BY GPCR |
| CCL27   | 2  | 2.45E+03 | 0.090 | SIGNALING BY GPCR |
| OR4Q2   | 2  | 2.23E+03 | 0.091 | SIGNALING BY GPCR |
| GRP     | 2  | 8.99E+02 | 0.092 | SIGNALING BY GPCR |
| RPS6KA1 | 4  | 6.96E+03 | 0.097 | SIGNALING BY GPCR |
| PSAP    | 3  | 3.19E+03 | 0.097 | SIGNALING BY GPCR |
| OR5J2   | 7  | 1.42E+04 | 0.099 | SIGNALING BY GPCR |
| REEP4   | 3  | 1.65E+04 | 0.103 | SIGNALING BY GPCR |
| SOS2    | 8  | 3.67E+04 | 0.105 | SIGNALING BY GPCR |
| SDC4    | 2  | 9.86E+02 | 0.105 | SIGNALING BY GPCR |
| APOB    | 42 | 8.05E+04 | 0.105 | SIGNALING BY GPCR |
| OR2K2   | 2  | 1.21E+03 | 0.105 | SIGNALING BY GPCR |
| PIK3CA  | 2  | 7.43E+03 | 0.109 | SIGNALING BY GPCR |
| OR1N2   | 2  | 8.65E+03 | 0.110 | SIGNALING BY GPCR |
| ADRB1   | 1  | 1.27E+03 | 0.110 | SIGNALING BY GPCR |
| GAST    | 4  | 6.01E+03 | 0.110 | SIGNALING BY GPCR |
| REEP5   | 2  | 1.02E+04 | 0.110 | SIGNALING BY GPCR |
| OR10G3  | 6  | 2.43E+04 | 0.111 | SIGNALING BY GPCR |
| SOS1    | 5  | 1.70E+04 | 0.112 | SIGNALING BY GPCR |
| OR8D2   | 3  | 4.87E+03 | 0.112 | SIGNALING BY GPCR |
| OR8I2   | 5  | 9.96E+03 | 0.114 | SIGNALING BY GPCR |
| KPNA2   | 5  | 1.51E+04 | 0.115 | SIGNALING BY GPCR |
| PTH1R   | 4  | 2.07E+04 | 0.116 | SIGNALING BY GPCR |
| GIPR    | 9  | 1.08E+04 | 0.116 | SIGNALING BY GPCR |
| TAS1R1  | 19 | 5.90E+04 | 0.117 | SIGNALING BY GPCR |
| PLPPR4  | 5  | 1.65E+04 | 0.117 | SIGNALING BY GPCR |
| SMO     | 11 | 2.18E+04 | 0.118 | SIGNALING BY GPCR |
| BCO1    | 9  | 1.97E+04 | 0.118 | SIGNALING BY GPCR |
| WNT7B   | 1  | 6.05E+02 | 0.118 | SIGNALING BY GPCR |
| PRKACB  | 2  | 2.25E+03 | 0.121 | SIGNALING BY GPCR |
| F2RL1   | 4  | 1.12E+04 | 0.121 | SIGNALING BY GPCR |
| OR4N5   | 6  | 5.97E+03 | 0.124 | SIGNALING BY GPCR |
| WNT9A   | 3  | 3.40E+03 | 0.125 | SIGNALING BY GPCR |
| HTR5A   | 1  | 9.91E+02 | 0.126 | SIGNALING BY GPCR |
| OR10T2  | 7  | 5.95E+03 | 0.126 | SIGNALING BY GPCR |
| OR6C74  | 5  | 1.11E+04 | 0.126 | SIGNALING BY GPCR |
| CNR1    | 1  | 5.34E+02 | 0.126 | SIGNALING BY GPCR |
| OR2M5   | 14 | 1.77E+05 | 0.127 | SIGNALING BY GPCR |
| OR8S1   | 2  | 4.49E+03 | 0.127 | SIGNALING BY GPCR |

|                 |    |          |       |                   |
|-----------------|----|----------|-------|-------------------|
| <i>TIAM1</i>    | 17 | 5.29E+04 | 0.128 | SIGNALING BY GPCR |
| <i>OR2G2</i>    | 1  | 8.43E+03 | 0.131 | SIGNALING BY GPCR |
| <i>TBXA2R</i>   | 12 | 2.12E+04 | 0.133 | SIGNALING BY GPCR |
| <i>OR2D2</i>    | 8  | 1.58E+04 | 0.133 | SIGNALING BY GPCR |
| <i>PIK3CG</i>   | 7  | 1.67E+04 | 0.134 | SIGNALING BY GPCR |
| <i>OR2A14</i>   | 5  | 2.94E+03 | 0.134 | SIGNALING BY GPCR |
| <i>HBEGF</i>    | 1  | 3.11E+03 | 0.135 | SIGNALING BY GPCR |
| <i>OR52D1</i>   | 4  | 4.01E+03 | 0.135 | SIGNALING BY GPCR |
| <i>CXCR4</i>    | 3  | 5.43E+03 | 0.136 | SIGNALING BY GPCR |
| <i>WNT10B</i>   | 4  | 1.61E+04 | 0.136 | SIGNALING BY GPCR |
| <i>AHCYL1</i>   | 1  | 6.32E+02 | 0.138 | SIGNALING BY GPCR |
| <i>OR4B1</i>    | 3  | 4.18E+03 | 0.139 | SIGNALING BY GPCR |
| <i>OR52E6</i>   | 5  | 5.77E+03 | 0.139 | SIGNALING BY GPCR |
| <i>NPB</i>      | 4  | 5.38E+03 | 0.141 | SIGNALING BY GPCR |
| <i>GPR20</i>    | 5  | 9.44E+03 | 0.143 | SIGNALING BY GPCR |
| <i>MCF2L</i>    | 22 | 4.31E+04 | 0.143 | SIGNALING BY GPCR |
| <i>OR8H1</i>    | 2  | 1.22E+04 | 0.143 | SIGNALING BY GPCR |
| <i>ARHGEF17</i> | 24 | 3.81E+04 | 0.145 | SIGNALING BY GPCR |
| <i>ADRB2</i>    | 2  | 8.42E+03 | 0.146 | SIGNALING BY GPCR |
| <i>HTR1A</i>    | 3  | 1.64E+04 | 0.147 | SIGNALING BY GPCR |
| <i>PLEKHG2</i>  | 15 | 2.36E+04 | 0.148 | SIGNALING BY GPCR |
| <i>CHRM2</i>    | 3  | 8.45E+03 | 0.148 | SIGNALING BY GPCR |
| <i>TAS2R50</i>  | 1  | 4.83E+02 | 0.149 | SIGNALING BY GPCR |
| <i>PTGFR</i>    | 6  | 1.78E+04 | 0.150 | SIGNALING BY GPCR |
| <i>GCG</i>      | 3  | 3.55E+03 | 0.151 | SIGNALING BY GPCR |
| <i>OR2T8</i>    | 14 | 1.22E+05 | 0.155 | SIGNALING BY GPCR |
| <i>S1PR2</i>    | 4  | 1.54E+04 | 0.156 | SIGNALING BY GPCR |
| <i>OR4D1</i>    | 3  | 4.03E+03 | 0.159 | SIGNALING BY GPCR |
| <i>OR11H1</i>   | 15 | 2.76E+04 | 0.159 | SIGNALING BY GPCR |
| <i>APOA1</i>    | 3  | 2.38E+03 | 0.160 | SIGNALING BY GPCR |
| <i>OR52J3</i>   | 4  | 5.45E+03 | 0.160 | SIGNALING BY GPCR |
| <i>ABHD12</i>   | 3  | 3.28E+03 | 0.160 | SIGNALING BY GPCR |
| <i>OR5H6</i>    | 9  | 4.43E+04 | 0.161 | SIGNALING BY GPCR |
| <i>CAMKK1</i>   | 3  | 4.94E+03 | 0.161 | SIGNALING BY GPCR |
| <i>CCR3</i>     | 7  | 2.09E+04 | 0.161 | SIGNALING BY GPCR |
| <i>PTGDR</i>    | 6  | 1.47E+04 | 0.161 | SIGNALING BY GPCR |
| <i>GPR45</i>    | 2  | 5.44E+02 | 0.162 | SIGNALING BY GPCR |
| <i>CNGA1</i>    | 6  | 1.67E+04 | 0.162 | SIGNALING BY GPCR |
| <i>RGSL1</i>    | 11 | 1.01E+04 | 0.167 | SIGNALING BY GPCR |
| <i>GNAI3</i>    | 1  | 4.73E+02 | 0.168 | SIGNALING BY GPCR |
| <i>OR6B2</i>    | 5  | 1.62E+04 | 0.168 | SIGNALING BY GPCR |
| <i>OR2AT4</i>   | 4  | 8.75E+03 | 0.168 | SIGNALING BY GPCR |
| <i>OR10A3</i>   | 6  | 9.71E+03 | 0.169 | SIGNALING BY GPCR |
| <i>OR5D16</i>   | 1  | 4.21E+02 | 0.171 | SIGNALING BY GPCR |
| <i>HTR2B</i>    | 1  | 2.85E+02 | 0.171 | SIGNALING BY GPCR |
| <i>DGKQ</i>     | 5  | 7.90E+03 | 0.171 | SIGNALING BY GPCR |
| <i>OR2T11</i>   | 6  | 8.16E+03 | 0.175 | SIGNALING BY GPCR |
| <i>OR6K3</i>    | 4  | 2.56E+03 | 0.175 | SIGNALING BY GPCR |
| <i>OPN4</i>     | 8  | 2.53E+04 | 0.177 | SIGNALING BY GPCR |
| <i>PRKAR1B</i>  | 5  | 6.22E+03 | 0.178 | SIGNALING BY GPCR |
| <i>RGS18</i>    | 1  | 2.84E+02 | 0.178 | SIGNALING BY GPCR |
| <i>ANXA1</i>    | 2  | 2.11E+03 | 0.179 | SIGNALING BY GPCR |
| <i>OR5A1</i>    | 3  | 8.33E+03 | 0.180 | SIGNALING BY GPCR |
| <i>OR7C1</i>    | 10 | 1.38E+04 | 0.180 | SIGNALING BY GPCR |
| <i>OR6C70</i>   | 1  | 2.81E+02 | 0.180 | SIGNALING BY GPCR |
| <i>DHRS3</i>    | 4  | 4.99E+03 | 0.181 | SIGNALING BY GPCR |
| <i>OR5K3</i>    | 8  | 1.75E+04 | 0.183 | SIGNALING BY GPCR |
| <i>GCGR</i>     | 6  | 1.09E+04 | 0.184 | SIGNALING BY GPCR |
| <i>PIK3R1</i>   | 1  | 3.44E+02 | 0.185 | SIGNALING BY GPCR |
| <i>CXCR1</i>    | 8  | 1.15E+04 | 0.187 | SIGNALING BY GPCR |
| <i>OR8G5</i>    | 8  | 5.30E+04 | 0.187 | SIGNALING BY GPCR |
| <i>ACKR3</i>    | 4  | 9.26E+03 | 0.188 | SIGNALING BY GPCR |
| <i>HTR1B</i>    | 1  | 6.22E+03 | 0.191 | SIGNALING BY GPCR |
| <i>CXCL3</i>    | 2  | 6.60E+03 | 0.191 | SIGNALING BY GPCR |
| <i>OR7G3</i>    | 6  | 8.76E+03 | 0.193 | SIGNALING BY GPCR |
| <i>GRM7</i>     | 1  | 4.46E+02 | 0.193 | SIGNALING BY GPCR |
| <i>GNA13</i>    | 5  | 6.93E+03 | 0.194 | SIGNALING BY GPCR |
| <i>ARHGEF5</i>  | 14 | 1.89E+04 | 0.195 | SIGNALING BY GPCR |
| <i>PLCB2</i>    | 12 | 1.50E+04 | 0.196 | SIGNALING BY GPCR |
| <i>GPR83</i>    | 3  | 2.96E+03 | 0.197 | SIGNALING BY GPCR |
| <i>OR9Q2</i>    | 2  | 6.45E+03 | 0.199 | SIGNALING BY GPCR |
| <i>RTP4</i>     | 4  | 1.30E+04 | 0.201 | SIGNALING BY GPCR |
| <i>OR4K15</i>   | 6  | 1.03E+04 | 0.201 | SIGNALING BY GPCR |
| <i>ROCK1</i>    | 3  | 1.09E+04 | 0.202 | SIGNALING BY GPCR |

|          |    |          |       |                   |
|----------|----|----------|-------|-------------------|
| CORT     | 1  | 3.50E+02 | 0.202 | SIGNALING BY GPCR |
| PDE4D    | 10 | 1.89E+04 | 0.202 | SIGNALING BY GPCR |
| OR6K2    | 2  | 1.71E+03 | 0.203 | SIGNALING BY GPCR |
| OR51I1   | 8  | 3.02E+04 | 0.203 | SIGNALING BY GPCR |
| FZD4     | 5  | 2.95E+04 | 0.203 | SIGNALING BY GPCR |
| OR1J1    | 7  | 2.21E+04 | 0.204 | SIGNALING BY GPCR |
| CYSLTR2  | 7  | 5.38E+04 | 0.204 | SIGNALING BY GPCR |
| GPR37    | 7  | 1.15E+04 | 0.206 | SIGNALING BY GPCR |
| ARHGEF16 | 11 | 2.31E+04 | 0.206 | SIGNALING BY GPCR |
| OR8D4    | 3  | 3.55E+03 | 0.207 | SIGNALING BY GPCR |
| REEP1    | 2  | 7.67E+02 | 0.208 | SIGNALING BY GPCR |
| OR13J1   | 3  | 1.61E+03 | 0.209 | SIGNALING BY GPCR |
| OR6C3    | 4  | 5.11E+03 | 0.209 | SIGNALING BY GPCR |
| FFAR4    | 2  | 6.99E+03 | 0.210 | SIGNALING BY GPCR |
| OR5R1    | 5  | 1.43E+04 | 0.210 | SIGNALING BY GPCR |
| OR13C4   | 5  | 1.43E+04 | 0.210 | SIGNALING BY GPCR |
| OR2T4    | 8  | 1.38E+04 | 0.210 | SIGNALING BY GPCR |
| OR6C2    | 4  | 5.06E+03 | 0.211 | SIGNALING BY GPCR |
| CCL5     | 1  | 3.12E+02 | 0.211 | SIGNALING BY GPCR |
| PRKCD    | 5  | 4.92E+03 | 0.211 | SIGNALING BY GPCR |
| CRHR2    | 11 | 2.24E+04 | 0.214 | SIGNALING BY GPCR |
| PDE1A    | 5  | 3.11E+03 | 0.215 | SIGNALING BY GPCR |
| TIAM2    | 26 | 4.92E+04 | 0.215 | SIGNALING BY GPCR |
| PDE10A   | 3  | 6.23E+03 | 0.217 | SIGNALING BY GPCR |
| GPR27    | 2  | 9.06E+02 | 0.218 | SIGNALING BY GPCR |
| OR1C1    | 3  | 1.95E+03 | 0.218 | SIGNALING BY GPCR |
| OR4K14   | 2  | 9.56E+02 | 0.220 | SIGNALING BY GPCR |
| OR2T27   | 12 | 2.92E+04 | 0.221 | SIGNALING BY GPCR |
| RTP1     | 4  | 1.05E+04 | 0.221 | SIGNALING BY GPCR |
| OR5AU1   | 2  | 9.77E+02 | 0.222 | SIGNALING BY GPCR |
| OR51T1   | 4  | 9.52E+03 | 0.222 | SIGNALING BY GPCR |
| OR7A5    | 7  | 9.76E+03 | 0.225 | SIGNALING BY GPCR |
| AVPR1B   | 9  | 1.01E+04 | 0.228 | SIGNALING BY GPCR |
| ADRA2A   | 4  | 3.12E+03 | 0.228 | SIGNALING BY GPCR |
| POMC     | 7  | 1.57E+04 | 0.229 | SIGNALING BY GPCR |
| RGS12    | 16 | 3.91E+04 | 0.230 | SIGNALING BY GPCR |
| GPR17    | 11 | 9.27E+03 | 0.232 | SIGNALING BY GPCR |
| GRM6     | 17 | 3.20E+04 | 0.234 | SIGNALING BY GPCR |
| OR10R2   | 5  | 1.30E+04 | 0.235 | SIGNALING BY GPCR |
| CALCB    | 1  | 3.69E+02 | 0.237 | SIGNALING BY GPCR |
| PLA2G4A  | 3  | 1.33E+04 | 0.237 | SIGNALING BY GPCR |
| ADCY7    | 10 | 1.36E+04 | 0.238 | SIGNALING BY GPCR |
| OR4M1    | 7  | 5.46E+03 | 0.239 | SIGNALING BY GPCR |
| RGS6     | 7  | 1.03E+04 | 0.240 | SIGNALING BY GPCR |
| NMUR2    | 7  | 1.75E+04 | 0.244 | SIGNALING BY GPCR |
| OR7C2    | 4  | 2.35E+04 | 0.245 | SIGNALING BY GPCR |
| OR10K1   | 1  | 9.61E+02 | 0.247 | SIGNALING BY GPCR |
| OR51G1   | 9  | 8.48E+03 | 0.248 | SIGNALING BY GPCR |
| OR5D18   | 3  | 1.02E+04 | 0.248 | SIGNALING BY GPCR |
| PPP3CA   | 2  | 8.30E+02 | 0.249 | SIGNALING BY GPCR |
| OR1I1    | 4  | 2.91E+04 | 0.250 | SIGNALING BY GPCR |
| OR10D3   | 3  | 1.60E+03 | 0.250 | SIGNALING BY GPCR |
| GALR1    | 4  | 2.03E+03 | 0.250 | SIGNALING BY GPCR |
| OR5L1    | 2  | 9.23E+02 | 0.251 | SIGNALING BY GPCR |
| NMT1     | 1  | 2.00E+02 | 0.256 | SIGNALING BY GPCR |
| CXCL2    | 3  | 1.19E+04 | 0.258 | SIGNALING BY GPCR |
| ARHGEF26 | 9  | 1.74E+04 | 0.259 | SIGNALING BY GPCR |
| OR1L1    | 6  | 9.04E+03 | 0.262 | SIGNALING BY GPCR |
| GNRH1    | 1  | 1.34E+03 | 0.266 | SIGNALING BY GPCR |
| PTGER1   | 6  | 6.37E+03 | 0.267 | SIGNALING BY GPCR |
| OR4X2    | 2  | 1.81E+03 | 0.267 | SIGNALING BY GPCR |
| OR51M1   | 10 | 1.46E+04 | 0.268 | SIGNALING BY GPCR |
| OR2A2    | 1  | 4.29E+02 | 0.268 | SIGNALING BY GPCR |
| OR1N1    | 7  | 8.38E+03 | 0.269 | SIGNALING BY GPCR |
| OR10J1   | 8  | 1.03E+04 | 0.271 | SIGNALING BY GPCR |
| AKR1C1   | 10 | 2.10E+04 | 0.271 | SIGNALING BY GPCR |
| RDH10    | 1  | 3.13E+03 | 0.275 | SIGNALING BY GPCR |
| NLN      | 7  | 5.29E+03 | 0.275 | SIGNALING BY GPCR |
| OR13C2   | 3  | 7.28E+03 | 0.276 | SIGNALING BY GPCR |
| KEL      | 8  | 9.16E+03 | 0.278 | SIGNALING BY GPCR |
| CCR9     | 4  | 8.16E+03 | 0.279 | SIGNALING BY GPCR |
| PIK3R6   | 11 | 1.39E+04 | 0.279 | SIGNALING BY GPCR |
| TAS2R43  | 4  | 2.08E+04 | 0.282 | SIGNALING BY GPCR |
| OR1L6    | 6  | 1.35E+04 | 0.282 | SIGNALING BY GPCR |

|          |    |          |       |                   |
|----------|----|----------|-------|-------------------|
| ECT2     | 7  | 4.29E+03 | 0.283 | SIGNALING BY GPCR |
| CAMKMT   | 2  | 6.22E+02 | 0.283 | SIGNALING BY GPCR |
| APOC2    | 2  | 1.85E+03 | 0.285 | SIGNALING BY GPCR |
| DGKB     | 5  | 8.22E+03 | 0.285 | SIGNALING BY GPCR |
| OR4C16   | 7  | 1.24E+04 | 0.286 | SIGNALING BY GPCR |
| OR9A2    | 5  | 4.09E+03 | 0.286 | SIGNALING BY GPCR |
| CXCL9    | 1  | 5.36E+02 | 0.289 | SIGNALING BY GPCR |
| PLEKHG5  | 18 | 1.58E+04 | 0.290 | SIGNALING BY GPCR |
| RXFP3    | 5  | 2.24E+03 | 0.290 | SIGNALING BY GPCR |
| OR4Q3    | 6  | 1.01E+04 | 0.290 | SIGNALING BY GPCR |
| TAS2R14  | 4  | 1.25E+04 | 0.293 | SIGNALING BY GPCR |
| C5       | 12 | 1.23E+04 | 0.294 | SIGNALING BY GPCR |
| RASGRF2  | 5  | 5.78E+03 | 0.295 | SIGNALING BY GPCR |
| GP1R1    | 5  | 9.33E+03 | 0.297 | SIGNALING BY GPCR |
| CNR2     | 5  | 6.09E+03 | 0.298 | SIGNALING BY GPCR |
| OR2A11   | 3  | 8.03E+03 | 0.298 | SIGNALING BY GPCR |
| UCN3     | 1  | 2.38E+02 | 0.298 | SIGNALING BY GPCR |
| WNT8A    | 2  | 1.07E+03 | 0.300 | SIGNALING BY GPCR |
| PIK3R2   | 7  | 5.87E+03 | 0.300 | SIGNALING BY GPCR |
| FSHR     | 5  | 4.26E+03 | 0.301 | SIGNALING BY GPCR |
| S1PR4    | 11 | 1.41E+04 | 0.301 | SIGNALING BY GPCR |
| GPR18    | 2  | 3.08E+03 | 0.301 | SIGNALING BY GPCR |
| VIPR2    | 7  | 5.04E+03 | 0.302 | SIGNALING BY GPCR |
| PPP3CC   | 1  | 3.03E+03 | 0.303 | SIGNALING BY GPCR |
| OR6C75   | 3  | 1.84E+03 | 0.303 | SIGNALING BY GPCR |
| HRH3     | 2  | 8.34E+02 | 0.304 | SIGNALING BY GPCR |
| ARHGEF33 | 4  | 1.42E+04 | 0.306 | SIGNALING BY GPCR |
| MAPK7    | 5  | 3.72E+03 | 0.306 | SIGNALING BY GPCR |
| OR2Y1    | 5  | 4.00E+04 | 0.307 | SIGNALING BY GPCR |
| TRHR     | 4  | 2.37E+03 | 0.307 | SIGNALING BY GPCR |
| CCR6     | 1  | 3.00E+03 | 0.307 | SIGNALING BY GPCR |
| OR5I1    | 4  | 2.61E+03 | 0.308 | SIGNALING BY GPCR |
| PTGIR    | 4  | 1.04E+04 | 0.308 | SIGNALING BY GPCR |
| CXCL1    | 1  | 7.24E+02 | 0.308 | SIGNALING BY GPCR |
| OR10X1   | 5  | 8.70E+03 | 0.309 | SIGNALING BY GPCR |
| OR2V1    | 4  | 2.85E+03 | 0.310 | SIGNALING BY GPCR |
| MC2R     | 5  | 5.79E+03 | 0.313 | SIGNALING BY GPCR |
| WNT11    | 1  | 3.04E+02 | 0.315 | SIGNALING BY GPCR |
| LPL      | 4  | 1.26E+04 | 0.316 | SIGNALING BY GPCR |
| OR2L3    | 3  | 5.62E+03 | 0.317 | SIGNALING BY GPCR |
| OR14A2   | 7  | 1.80E+04 | 0.318 | SIGNALING BY GPCR |
| TACR1    | 2  | 9.74E+02 | 0.318 | SIGNALING BY GPCR |
| ARHGEF15 | 10 | 1.36E+04 | 0.318 | SIGNALING BY GPCR |
| OR6N2    | 2  | 3.56E+03 | 0.320 | SIGNALING BY GPCR |
| OR6V1    | 5  | 4.89E+03 | 0.324 | SIGNALING BY GPCR |
| CNGB1    | 15 | 2.18E+04 | 0.325 | SIGNALING BY GPCR |
| IHH      | 5  | 1.99E+03 | 0.326 | SIGNALING BY GPCR |
| OR8K1    | 3  | 1.79E+03 | 0.326 | SIGNALING BY GPCR |
| DGKZ     | 12 | 2.49E+04 | 0.327 | SIGNALING BY GPCR |
| APOC3    | 1  | 5.25E+02 | 0.327 | SIGNALING BY GPCR |
| LTB4R    | 4  | 1.86E+03 | 0.327 | SIGNALING BY GPCR |
| GRM5     | 4  | 1.84E+03 | 0.328 | SIGNALING BY GPCR |
| OR14J1   | 2  | 1.15E+03 | 0.329 | SIGNALING BY GPCR |
| OR1S2    | 11 | 9.09E+03 | 0.330 | SIGNALING BY GPCR |
| SDR9C7   | 4  | 2.09E+03 | 0.332 | SIGNALING BY GPCR |
| RHOB     | 1  | 3.01E+02 | 0.336 | SIGNALING BY GPCR |
| HEBP1    | 3  | 1.16E+03 | 0.337 | SIGNALING BY GPCR |
| OR1L3    | 9  | 2.65E+04 | 0.339 | SIGNALING BY GPCR |
| LRP2     | 49 | 9.97E+04 | 0.340 | SIGNALING BY GPCR |
| PTAFR    | 3  | 2.22E+03 | 0.341 | SIGNALING BY GPCR |
| RAMP1    | 1  | 1.35E+02 | 0.342 | SIGNALING BY GPCR |
| PDE8A    | 3  | 1.81E+03 | 0.342 | SIGNALING BY GPCR |
| GPR176   | 1  | 2.06E+02 | 0.343 | SIGNALING BY GPCR |
| NPFFR1   | 8  | 5.71E+03 | 0.347 | SIGNALING BY GPCR |
| OR6F1    | 1  | 2.99E+03 | 0.348 | SIGNALING BY GPCR |
| OR4E2    | 5  | 5.57E+03 | 0.348 | SIGNALING BY GPCR |
| CXCR5    | 4  | 5.22E+03 | 0.349 | SIGNALING BY GPCR |
| PDE2A    | 5  | 2.09E+03 | 0.352 | SIGNALING BY GPCR |
| PCP2     | 2  | 1.39E+03 | 0.353 | SIGNALING BY GPCR |
| OR6C6    | 5  | 7.48E+03 | 0.354 | SIGNALING BY GPCR |
| OR56A5   | 3  | 7.44E+03 | 0.354 | SIGNALING BY GPCR |
| EGFR     | 6  | 1.87E+03 | 0.355 | SIGNALING BY GPCR |
| OR9G4    | 8  | 6.12E+03 | 0.355 | SIGNALING BY GPCR |
| ADCY3    | 11 | 4.81E+03 | 0.359 | SIGNALING BY GPCR |

|          |    |          |       |                   |
|----------|----|----------|-------|-------------------|
| ACKR4    | 5  | 3.86E+03 | 0.361 | SIGNALING BY GPCR |
| TAC3     | 1  | 1.28E+02 | 0.362 | SIGNALING BY GPCR |
| HRH2     | 3  | 1.80E+03 | 0.362 | SIGNALING BY GPCR |
| GPRC6A   | 9  | 1.86E+04 | 0.362 | SIGNALING BY GPCR |
| GUCA1B   | 1  | 2.76E+03 | 0.363 | SIGNALING BY GPCR |
| OR2T3    | 11 | 1.15E+04 | 0.364 | SIGNALING BY GPCR |
| PIK3R3   | 4  | 3.69E+03 | 0.365 | SIGNALING BY GPCR |
| OR52R1   | 1  | 5.25E+02 | 0.366 | SIGNALING BY GPCR |
| APLF     | 5  | 4.98E+03 | 0.366 | SIGNALING BY GPCR |
| CCL23    | 2  | 3.99E+03 | 0.367 | SIGNALING BY GPCR |
| OR8B8    | 4  | 4.30E+03 | 0.368 | SIGNALING BY GPCR |
| OPN1SW   | 3  | 1.34E+03 | 0.371 | SIGNALING BY GPCR |
| OR4C13   | 9  | 7.99E+03 | 0.372 | SIGNALING BY GPCR |
| ABCA4    | 35 | 4.32E+04 | 0.373 | SIGNALING BY GPCR |
| GHRH     | 1  | 2.90E+03 | 0.373 | SIGNALING BY GPCR |
| OPRM1    | 16 | 1.52E+04 | 0.374 | SIGNALING BY GPCR |
| OR14I1   | 6  | 5.64E+03 | 0.374 | SIGNALING BY GPCR |
| OR2A1    | 3  | 2.81E+03 | 0.375 | SIGNALING BY GPCR |
| OR2A42   | 3  | 2.81E+03 | 0.375 | SIGNALING BY GPCR |
| TRPC7    | 3  | 2.24E+03 | 0.375 | SIGNALING BY GPCR |
| OR6J1    | 2  | 3.83E+03 | 0.376 | SIGNALING BY GPCR |
| DRD5     | 6  | 5.99E+03 | 0.376 | SIGNALING BY GPCR |
| OR4D6    | 8  | 1.62E+04 | 0.378 | SIGNALING BY GPCR |
| CALCR    | 6  | 4.50E+03 | 0.378 | SIGNALING BY GPCR |
| GRM4     | 2  | 8.27E+02 | 0.380 | SIGNALING BY GPCR |
| OR2L2    | 5  | 4.03E+03 | 0.380 | SIGNALING BY GPCR |
| OR52W1   | 4  | 3.69E+03 | 0.382 | SIGNALING BY GPCR |
| AKR1C4   | 2  | 5.51E+02 | 0.386 | SIGNALING BY GPCR |
| OR56A1   | 4  | 6.35E+03 | 0.387 | SIGNALING BY GPCR |
| GNRHR    | 5  | 5.57E+03 | 0.387 | SIGNALING BY GPCR |
| OR11L1   | 3  | 2.39E+03 | 0.388 | SIGNALING BY GPCR |
| OR10A2   | 3  | 1.97E+03 | 0.388 | SIGNALING BY GPCR |
| ARHGEF3  | 5  | 3.60E+03 | 0.389 | SIGNALING BY GPCR |
| TAAR8    | 2  | 1.09E+03 | 0.390 | SIGNALING BY GPCR |
| ADCY4    | 12 | 1.52E+04 | 0.392 | SIGNALING BY GPCR |
| GUCA1A   | 5  | 3.36E+03 | 0.392 | SIGNALING BY GPCR |
| PLCB1    | 8  | 6.14E+03 | 0.392 | SIGNALING BY GPCR |
| GPR31    | 4  | 2.12E+03 | 0.393 | SIGNALING BY GPCR |
| ITPR2    | 10 | 9.65E+03 | 0.393 | SIGNALING BY GPCR |
| OR5C1    | 4  | 2.46E+03 | 0.393 | SIGNALING BY GPCR |
| FZD3     | 3  | 1.34E+03 | 0.393 | SIGNALING BY GPCR |
| TAS2R46  | 2  | 9.42E+02 | 0.394 | SIGNALING BY GPCR |
| OR14K1   | 2  | 3.31E+03 | 0.394 | SIGNALING BY GPCR |
| PROKR2   | 7  | 5.79E+03 | 0.396 | SIGNALING BY GPCR |
| GPR132   | 2  | 2.70E+03 | 0.398 | SIGNALING BY GPCR |
| DRD4     | 25 | 3.81E+04 | 0.398 | SIGNALING BY GPCR |
| OR2L8    | 9  | 4.83E+03 | 0.399 | SIGNALING BY GPCR |
| OR2T10   | 2  | 1.05E+03 | 0.400 | SIGNALING BY GPCR |
| SST      | 4  | 9.12E+03 | 0.401 | SIGNALING BY GPCR |
| OR13D1   | 6  | 7.49E+03 | 0.402 | SIGNALING BY GPCR |
| RGS7     | 4  | 1.46E+03 | 0.403 | SIGNALING BY GPCR |
| OR2T2    | 13 | 1.01E+04 | 0.403 | SIGNALING BY GPCR |
| NTS      | 3  | 1.62E+03 | 0.404 | SIGNALING BY GPCR |
| OR5L2    | 4  | 3.59E+03 | 0.406 | SIGNALING BY GPCR |
| TAS2R30  | 23 | 4.50E+04 | 0.410 | SIGNALING BY GPCR |
| OR2C1    | 7  | 8.28E+03 | 0.411 | SIGNALING BY GPCR |
| WNT3A    | 2  | 4.57E+02 | 0.412 | SIGNALING BY GPCR |
| NMB      | 1  | 3.51E+02 | 0.417 | SIGNALING BY GPCR |
| ARHGEF37 | 7  | 5.88E+03 | 0.417 | SIGNALING BY GPCR |
| OR5AR1   | 3  | 1.18E+03 | 0.419 | SIGNALING BY GPCR |
| OR3A3    | 3  | 5.12E+03 | 0.425 | SIGNALING BY GPCR |
| RAMP3    | 2  | 5.45E+02 | 0.427 | SIGNALING BY GPCR |
| OR4N2    | 8  | 6.46E+03 | 0.427 | SIGNALING BY GPCR |
| OR51A7   | 4  | 3.59E+03 | 0.427 | SIGNALING BY GPCR |
| GPC1     | 11 | 1.82E+04 | 0.430 | SIGNALING BY GPCR |
| OR52K1   | 5  | 5.79E+03 | 0.431 | SIGNALING BY GPCR |
| FSHB     | 3  | 2.34E+03 | 0.432 | SIGNALING BY GPCR |
| OR52A5   | 4  | 3.54E+03 | 0.432 | SIGNALING BY GPCR |
| OR10Z1   | 4  | 7.23E+03 | 0.432 | SIGNALING BY GPCR |
| TACR2    | 9  | 6.30E+03 | 0.433 | SIGNALING BY GPCR |
| OR1J2    | 4  | 5.21E+03 | 0.435 | SIGNALING BY GPCR |
| LRP10    | 7  | 5.21E+03 | 0.435 | SIGNALING BY GPCR |
| PRKCG    | 1  | 1.84E+02 | 0.435 | SIGNALING BY GPCR |
| OR2T1    | 4  | 3.34E+03 | 0.436 | SIGNALING BY GPCR |

|          |    |          |       |                   |
|----------|----|----------|-------|-------------------|
| STRA6    | 8  | 8.72E+03 | 0.437 | SIGNALING BY GPCR |
| ADGRE5   | 16 | 1.21E+04 | 0.437 | SIGNALING BY GPCR |
| C3AR1    | 2  | 3.22E+03 | 0.439 | SIGNALING BY GPCR |
| PDE4C    | 2  | 1.55E+03 | 0.440 | SIGNALING BY GPCR |
| OR2J1    | 6  | 4.48E+03 | 0.440 | SIGNALING BY GPCR |
| OR5P2    | 6  | 3.05E+03 | 0.441 | SIGNALING BY GPCR |
| DGKH     | 13 | 1.25E+04 | 0.442 | SIGNALING BY GPCR |
| OR2AK2   | 2  | 1.36E+03 | 0.443 | SIGNALING BY GPCR |
| PLPPR1   | 2  | 3.09E+03 | 0.443 | SIGNALING BY GPCR |
| FGD3     | 5  | 5.15E+03 | 0.443 | SIGNALING BY GPCR |
| OR5M10   | 5  | 2.01E+03 | 0.444 | SIGNALING BY GPCR |
| NGEF     | 6  | 5.07E+03 | 0.445 | SIGNALING BY GPCR |
| TAS2R16  | 4  | 1.56E+03 | 0.445 | SIGNALING BY GPCR |
| QRFP     | 3  | 7.08E+03 | 0.446 | SIGNALING BY GPCR |
| PENK     | 4  | 1.99E+03 | 0.448 | SIGNALING BY GPCR |
| OR4K2    | 4  | 3.71E+03 | 0.448 | SIGNALING BY GPCR |
| MYO7A    | 24 | 1.92E+04 | 0.449 | SIGNALING BY GPCR |
| CCR4     | 1  | 1.22E+02 | 0.449 | SIGNALING BY GPCR |
| GPC2     | 5  | 1.59E+03 | 0.452 | SIGNALING BY GPCR |
| GPR32    | 8  | 6.71E+03 | 0.454 | SIGNALING BY GPCR |
| RDH16    | 5  | 1.98E+03 | 0.455 | SIGNALING BY GPCR |
| CCRL2    | 5  | 8.35E+03 | 0.456 | SIGNALING BY GPCR |
| OR13C8   | 1  | 1.91E+03 | 0.459 | SIGNALING BY GPCR |
| OR10G9   | 15 | 4.72E+04 | 0.460 | SIGNALING BY GPCR |
| OR5W2    | 1  | 1.29E+02 | 0.462 | SIGNALING BY GPCR |
| GABBR1   | 3  | 1.77E+03 | 0.462 | SIGNALING BY GPCR |
| ARHGEF40 | 10 | 1.19E+04 | 0.462 | SIGNALING BY GPCR |
| PLPPR2   | 5  | 4.02E+03 | 0.464 | SIGNALING BY GPCR |
| PRKCQ    | 5  | 1.70E+03 | 0.464 | SIGNALING BY GPCR |
| TAS2R38  | 3  | 1.69E+03 | 0.465 | SIGNALING BY GPCR |
| AKR1B10  | 10 | 7.59E+03 | 0.466 | SIGNALING BY GPCR |
| LHCGR    | 2  | 1.24E+03 | 0.466 | SIGNALING BY GPCR |
| OR6P1    | 7  | 7.75E+03 | 0.466 | SIGNALING BY GPCR |
| S1PR5    | 4  | 6.22E+03 | 0.470 | SIGNALING BY GPCR |
| SSTR3    | 13 | 6.32E+03 | 0.471 | SIGNALING BY GPCR |
| OR4K13   | 1  | 1.43E+03 | 0.474 | SIGNALING BY GPCR |
| GPBAR1   | 5  | 2.77E+03 | 0.475 | SIGNALING BY GPCR |
| FNTA     | 3  | 1.61E+03 | 0.475 | SIGNALING BY GPCR |
| MC5R     | 3  | 2.21E+03 | 0.475 | SIGNALING BY GPCR |
| OR5T3    | 4  | 3.93E+03 | 0.477 | SIGNALING BY GPCR |
| MC3R     | 2  | 9.04E+02 | 0.477 | SIGNALING BY GPCR |
| OR51A4   | 5  | 6.20E+03 | 0.478 | SIGNALING BY GPCR |
| OR10AD1  | 4  | 2.91E+03 | 0.478 | SIGNALING BY GPCR |
| TAS1R3   | 16 | 1.18E+04 | 0.479 | SIGNALING BY GPCR |
| GPR39    | 7  | 5.36E+03 | 0.481 | SIGNALING BY GPCR |
| OR1K1    | 10 | 1.37E+04 | 0.481 | SIGNALING BY GPCR |
| NPY2R    | 1  | 2.28E+02 | 0.482 | SIGNALING BY GPCR |
| PTCH1    | 17 | 9.47E+03 | 0.483 | SIGNALING BY GPCR |
| GPIHBP1  | 5  | 1.86E+03 | 0.483 | SIGNALING BY GPCR |
| F2R      | 2  | 6.48E+02 | 0.484 | SIGNALING BY GPCR |
| SSTR5    | 14 | 5.90E+03 | 0.484 | SIGNALING BY GPCR |
| RXFP4    | 8  | 4.86E+03 | 0.485 | SIGNALING BY GPCR |
| OR51B5   | 55 | 6.11E+04 | 0.486 | SIGNALING BY GPCR |
| OR2J3    | 5  | 4.38E+03 | 0.488 | SIGNALING BY GPCR |
| UCN2     | 2  | 1.05E+03 | 0.488 | SIGNALING BY GPCR |
| KISS1    | 1  | 9.08E+01 | 0.488 | SIGNALING BY GPCR |
| ADCY2    | 4  | 3.70E+03 | 0.499 | SIGNALING BY GPCR |
| PTH2     | 4  | 1.75E+03 | 0.499 | SIGNALING BY GPCR |
| OR1Q1    | 4  | 2.84E+03 | 0.500 | SIGNALING BY GPCR |
| SDC1     | 6  | 3.25E+03 | 0.500 | SIGNALING BY GPCR |
| ADRA1B   | 6  | 2.10E+03 | 0.501 | SIGNALING BY GPCR |
| OR4A47   | 7  | 1.15E+04 | 0.502 | SIGNALING BY GPCR |
| GPR55    | 2  | 4.16E+02 | 0.503 | SIGNALING BY GPCR |
| CXCR6    | 2  | 1.13E+03 | 0.505 | SIGNALING BY GPCR |
| OR1B1    | 4  | 4.11E+03 | 0.505 | SIGNALING BY GPCR |
| GALR2    | 4  | 6.54E+03 | 0.506 | SIGNALING BY GPCR |
| CCL16    | 1  | 1.49E+03 | 0.506 | SIGNALING BY GPCR |
| OR4S1    | 3  | 6.20E+02 | 0.506 | SIGNALING BY GPCR |
| OR8H3    | 3  | 1.37E+03 | 0.506 | SIGNALING BY GPCR |
| OPRK1    | 3  | 5.16E+02 | 0.507 | SIGNALING BY GPCR |
| NPW      | 3  | 7.17E+02 | 0.508 | SIGNALING BY GPCR |
| NPSR1    | 4  | 3.46E+03 | 0.509 | SIGNALING BY GPCR |
| UTS2     | 2  | 3.07E+03 | 0.510 | SIGNALING BY GPCR |
| CMKLR1   | 5  | 8.10E+03 | 0.511 | SIGNALING BY GPCR |

|           |    |          |       |                   |
|-----------|----|----------|-------|-------------------|
| OR9I1     | 7  | 6.83E+03 | 0.514 | SIGNALING BY GPCR |
| NMU       | 3  | 2.95E+03 | 0.514 | SIGNALING BY GPCR |
| OR10J3    | 1  | 6.74E+01 | 0.514 | SIGNALING BY GPCR |
| OR4C5     | 7  | 2.55E+04 | 0.517 | SIGNALING BY GPCR |
| OR1F1     | 8  | 4.28E+03 | 0.519 | SIGNALING BY GPCR |
| ADCY5     | 11 | 4.50E+03 | 0.520 | SIGNALING BY GPCR |
| GRM3      | 4  | 3.25E+03 | 0.520 | SIGNALING BY GPCR |
| OR8H2     | 3  | 3.99E+03 | 0.522 | SIGNALING BY GPCR |
| OR5B17    | 5  | 4.17E+03 | 0.523 | SIGNALING BY GPCR |
| GHRL      | 3  | 4.65E+03 | 0.524 | SIGNALING BY GPCR |
| PLPPR3    | 10 | 7.52E+03 | 0.526 | SIGNALING BY GPCR |
| LTB4R2    | 4  | 1.01E+03 | 0.527 | SIGNALING BY GPCR |
| FFAR1     | 3  | 1.69E+03 | 0.530 | SIGNALING BY GPCR |
| FPR2      | 3  | 1.80E+03 | 0.531 | SIGNALING BY GPCR |
| OR6C65    | 1  | 1.41E+02 | 0.531 | SIGNALING BY GPCR |
| ITSN1     | 5  | 1.89E+03 | 0.533 | SIGNALING BY GPCR |
| F2RL2     | 4  | 8.44E+03 | 0.534 | SIGNALING BY GPCR |
| CCL13     | 2  | 3.88E+02 | 0.535 | SIGNALING BY GPCR |
| S1PR1     | 2  | 2.46E+03 | 0.537 | SIGNALING BY GPCR |
| PMCH      | 1  | 9.44E+01 | 0.539 | SIGNALING BY GPCR |
| GNAO1     | 1  | 9.57E+01 | 0.539 | SIGNALING BY GPCR |
| OR2S2     | 4  | 3.07E+03 | 0.539 | SIGNALING BY GPCR |
| OR10V1    | 4  | 4.49E+03 | 0.539 | SIGNALING BY GPCR |
| OR5V1     | 5  | 9.24E+03 | 0.539 | SIGNALING BY GPCR |
| WNT4      | 1  | 9.13E+01 | 0.540 | SIGNALING BY GPCR |
| OR6A2     | 6  | 2.75E+03 | 0.540 | SIGNALING BY GPCR |
| OR10G6    | 5  | 4.34E+03 | 0.540 | SIGNALING BY GPCR |
| PDE7B     | 1  | 9.04E+01 | 0.541 | SIGNALING BY GPCR |
| FFAR2     | 6  | 2.79E+03 | 0.541 | SIGNALING BY GPCR |
| OR51B6    | 3  | 2.87E+03 | 0.542 | SIGNALING BY GPCR |
| NPY5R     | 1  | 7.21E+01 | 0.542 | SIGNALING BY GPCR |
| ADCYAP1R1 | 8  | 3.48E+03 | 0.544 | SIGNALING BY GPCR |
| PLCB4     | 7  | 4.27E+03 | 0.544 | SIGNALING BY GPCR |
| RGS22     | 15 | 8.88E+03 | 0.545 | SIGNALING BY GPCR |
| GPR25     | 6  | 1.04E+04 | 0.546 | SIGNALING BY GPCR |
| OR2M7     | 3  | 3.14E+03 | 0.549 | SIGNALING BY GPCR |
| UCN       | 1  | 2.24E+02 | 0.549 | SIGNALING BY GPCR |
| TACR3     | 4  | 3.29E+03 | 0.549 | SIGNALING BY GPCR |
| RPE65     | 3  | 1.39E+03 | 0.549 | SIGNALING BY GPCR |
| TAS2R42   | 1  | 8.11E+01 | 0.550 | SIGNALING BY GPCR |
| PRLH      | 2  | 7.62E+02 | 0.552 | SIGNALING BY GPCR |
| CCKBR     | 2  | 5.36E+02 | 0.553 | SIGNALING BY GPCR |
| PRKCA     | 2  | 2.58E+03 | 0.553 | SIGNALING BY GPCR |
| GPR35     | 9  | 1.59E+04 | 0.553 | SIGNALING BY GPCR |
| LPAR2     | 2  | 1.59E+03 | 0.554 | SIGNALING BY GPCR |
| CCR1      | 3  | 1.03E+03 | 0.554 | SIGNALING BY GPCR |
| LRP8      | 5  | 1.31E+03 | 0.555 | SIGNALING BY GPCR |
| OR5M11    | 4  | 3.46E+03 | 0.555 | SIGNALING BY GPCR |
| OR2A4     | 1  | 7.67E+01 | 0.556 | SIGNALING BY GPCR |
| APOA2     | 1  | 1.53E+02 | 0.557 | SIGNALING BY GPCR |
| PRKCH     | 5  | 4.63E+03 | 0.558 | SIGNALING BY GPCR |
| HTR1D     | 5  | 1.45E+03 | 0.558 | SIGNALING BY GPCR |
| GRK3      | 2  | 7.31E+02 | 0.559 | SIGNALING BY GPCR |
| OR2L13    | 31 | 1.87E+04 | 0.559 | SIGNALING BY GPCR |
| OR10G8    | 8  | 5.34E+03 | 0.562 | SIGNALING BY GPCR |
| ARHGEF39  | 4  | 3.39E+03 | 0.563 | SIGNALING BY GPCR |
| OR51B4    | 5  | 2.12E+03 | 0.563 | SIGNALING BY GPCR |
| OR2Z1     | 6  | 1.35E+03 | 0.563 | SIGNALING BY GPCR |
| MCHR2     | 1  | 1.26E+03 | 0.564 | SIGNALING BY GPCR |
| GHSR      | 3  | 8.21E+02 | 0.565 | SIGNALING BY GPCR |
| ADRB3     | 5  | 1.22E+03 | 0.565 | SIGNALING BY GPCR |
| OR9K2     | 3  | 1.47E+03 | 0.566 | SIGNALING BY GPCR |
| ADORA1    | 4  | 1.27E+03 | 0.566 | SIGNALING BY GPCR |
| OR1S1     | 8  | 5.01E+03 | 0.566 | SIGNALING BY GPCR |
| TAAR5     | 11 | 7.90E+03 | 0.567 | SIGNALING BY GPCR |
| LRAT      | 2  | 8.27E+02 | 0.571 | SIGNALING BY GPCR |
| RGS3      | 24 | 1.14E+04 | 0.571 | SIGNALING BY GPCR |
| OR51D1    | 4  | 1.82E+03 | 0.571 | SIGNALING BY GPCR |
| GNAT1     | 2  | 3.05E+02 | 0.572 | SIGNALING BY GPCR |
| OR8B2     | 4  | 3.99E+03 | 0.572 | SIGNALING BY GPCR |
| MGLL      | 4  | 2.44E+03 | 0.572 | SIGNALING BY GPCR |
| OR4L1     | 6  | 5.15E+03 | 0.573 | SIGNALING BY GPCR |
| OR56B1    | 3  | 8.91E+02 | 0.574 | SIGNALING BY GPCR |
| ARHGEF18  | 28 | 2.48E+04 | 0.576 | SIGNALING BY GPCR |

|           |    |          |       |                   |
|-----------|----|----------|-------|-------------------|
| OR2AG2    | 4  | 1.31E+03 | 0.578 | SIGNALING BY GPCR |
| ADORA2A   | 4  | 7.09E+02 | 0.579 | SIGNALING BY GPCR |
| TAS2R31   | 9  | 2.08E+04 | 0.579 | SIGNALING BY GPCR |
| ARHGEF10L | 16 | 7.68E+03 | 0.581 | SIGNALING BY GPCR |
| EDN2      | 2  | 8.08E+02 | 0.582 | SIGNALING BY GPCR |
| TAAR6     | 8  | 6.24E+03 | 0.583 | SIGNALING BY GPCR |
| VAV2      | 10 | 5.39E+03 | 0.583 | SIGNALING BY GPCR |
| HCRTR1    | 6  | 2.57E+03 | 0.584 | SIGNALING BY GPCR |
| OR10Q1    | 4  | 2.47E+03 | 0.586 | SIGNALING BY GPCR |
| ADRA1A    | 11 | 1.61E+04 | 0.586 | SIGNALING BY GPCR |
| PRKAR1A   | 10 | 4.10E+03 | 0.586 | SIGNALING BY GPCR |
| DGKE      | 5  | 2.87E+03 | 0.587 | SIGNALING BY GPCR |
| OPRD1     | 2  | 4.06E+02 | 0.587 | SIGNALING BY GPCR |
| OR9A4     | 2  | 4.51E+02 | 0.588 | SIGNALING BY GPCR |
| OR2AP1    | 6  | 1.37E+03 | 0.588 | SIGNALING BY GPCR |
| GPR68     | 3  | 6.43E+02 | 0.588 | SIGNALING BY GPCR |
| OR7G2     | 4  | 6.27E+02 | 0.589 | SIGNALING BY GPCR |
| KRAS      | 2  | 3.83E+02 | 0.589 | SIGNALING BY GPCR |
| SCTR      | 6  | 6.15E+03 | 0.589 | SIGNALING BY GPCR |
| OR5AP2    | 3  | 2.72E+03 | 0.590 | SIGNALING BY GPCR |
| ADCY8     | 7  | 5.47E+03 | 0.591 | SIGNALING BY GPCR |
| TRH       | 1  | 4.51E+02 | 0.591 | SIGNALING BY GPCR |
| FPR1      | 5  | 2.74E+03 | 0.591 | SIGNALING BY GPCR |
| GRK7      | 9  | 7.81E+03 | 0.591 | SIGNALING BY GPCR |
| OR12D2    | 7  | 5.65E+03 | 0.594 | SIGNALING BY GPCR |
| OR10H3    | 2  | 6.63E+02 | 0.596 | SIGNALING BY GPCR |
| RGS9BP    | 3  | 2.62E+03 | 0.596 | SIGNALING BY GPCR |
| SAA1      | 6  | 3.52E+03 | 0.597 | SIGNALING BY GPCR |
| CRHR1     | 4  | 7.95E+03 | 0.597 | SIGNALING BY GPCR |
| ADM       | 2  | 1.17E+03 | 0.598 | SIGNALING BY GPCR |
| RLBP1     | 4  | 6.73E+02 | 0.598 | SIGNALING BY GPCR |
| PDE7A     | 3  | 6.45E+02 | 0.599 | SIGNALING BY GPCR |
| NET1      | 8  | 1.63E+03 | 0.601 | SIGNALING BY GPCR |
| OR6X1     | 3  | 2.33E+03 | 0.602 | SIGNALING BY GPCR |
| P2RY13    | 2  | 3.58E+03 | 0.602 | SIGNALING BY GPCR |
| GPSM1     | 5  | 2.29E+03 | 0.602 | SIGNALING BY GPCR |
| ABR       | 12 | 1.25E+04 | 0.602 | SIGNALING BY GPCR |
| RGS9      | 6  | 6.67E+03 | 0.605 | SIGNALING BY GPCR |
| OR10W1    | 7  | 1.02E+04 | 0.607 | SIGNALING BY GPCR |
| KALRN     | 27 | 2.42E+04 | 0.608 | SIGNALING BY GPCR |
| PROK1     | 1  | 3.60E+01 | 0.608 | SIGNALING BY GPCR |
| P2RY11    | 9  | 8.60E+03 | 0.608 | SIGNALING BY GPCR |
| OR7D4     | 3  | 1.16E+03 | 0.609 | SIGNALING BY GPCR |
| OR7A10    | 7  | 1.99E+03 | 0.609 | SIGNALING BY GPCR |
| OR8B12    | 6  | 2.08E+03 | 0.610 | SIGNALING BY GPCR |
| PNOC      | 2  | 2.92E+02 | 0.610 | SIGNALING BY GPCR |
| OR13C5    | 12 | 5.92E+03 | 0.610 | SIGNALING BY GPCR |
| OR8U1     | 8  | 5.76E+03 | 0.610 | SIGNALING BY GPCR |
| PLCB3     | 7  | 6.74E+03 | 0.611 | SIGNALING BY GPCR |
| ARRB2     | 3  | 1.62E+03 | 0.616 | SIGNALING BY GPCR |
| TAAR1     | 1  | 5.50E+01 | 0.616 | SIGNALING BY GPCR |
| TAS2R40   | 4  | 7.39E+02 | 0.618 | SIGNALING BY GPCR |
| DGKD      | 7  | 1.14E+03 | 0.618 | SIGNALING BY GPCR |
| PDE8B     | 3  | 1.93E+03 | 0.618 | SIGNALING BY GPCR |
| RGS16     | 3  | 2.35E+03 | 0.622 | SIGNALING BY GPCR |
| ITPR3     | 15 | 4.94E+03 | 0.623 | SIGNALING BY GPCR |
| AKT2      | 3  | 4.37E+02 | 0.624 | SIGNALING BY GPCR |
| RASGRP1   | 2  | 2.64E+02 | 0.624 | SIGNALING BY GPCR |
| GPR84     | 6  | 2.07E+03 | 0.625 | SIGNALING BY GPCR |
| NPFF      | 2  | 4.01E+02 | 0.626 | SIGNALING BY GPCR |
| GNG12     | 2  | 4.72E+02 | 0.627 | SIGNALING BY GPCR |
| OR9G1     | 2  | 7.89E+02 | 0.628 | SIGNALING BY GPCR |
| OR10G2    | 4  | 2.44E+03 | 0.628 | SIGNALING BY GPCR |
| BDKRB1    | 6  | 2.20E+03 | 0.629 | SIGNALING BY GPCR |
| GNB5      | 1  | 3.69E+02 | 0.629 | SIGNALING BY GPCR |
| GLP2R     | 5  | 3.84E+03 | 0.631 | SIGNALING BY GPCR |
| PREX1     | 9  | 5.11E+03 | 0.632 | SIGNALING BY GPCR |
| FZD5      | 3  | 1.22E+03 | 0.633 | SIGNALING BY GPCR |
| AKT1      | 2  | 2.60E+02 | 0.633 | SIGNALING BY GPCR |
| GALR3     | 11 | 8.22E+03 | 0.634 | SIGNALING BY GPCR |
| PPP1R1B   | 4  | 5.23E+03 | 0.634 | SIGNALING BY GPCR |
| KISS1R    | 2  | 5.28E+02 | 0.635 | SIGNALING BY GPCR |
| GABBR2    | 1  | 5.62E+01 | 0.635 | SIGNALING BY GPCR |
| OR4C12    | 2  | 4.91E+02 | 0.636 | SIGNALING BY GPCR |

|                 |    |          |       |                   |
|-----------------|----|----------|-------|-------------------|
| <i>PTHLH</i>    | 1  | 4.74E+01 | 0.637 | SIGNALING BY GPCR |
| <i>OR8J3</i>    | 2  | 4.83E+02 | 0.638 | SIGNALING BY GPCR |
| <i>OR4C3</i>    | 4  | 3.11E+02 | 0.638 | SIGNALING BY GPCR |
| <i>OR3A1</i>    | 7  | 3.72E+03 | 0.638 | SIGNALING BY GPCR |
| <i>OR1M1</i>    | 9  | 2.85E+03 | 0.640 | SIGNALING BY GPCR |
| <i>OR56B4</i>   | 2  | 1.27E+03 | 0.641 | SIGNALING BY GPCR |
| <i>OR2T6</i>    | 5  | 5.26E+03 | 0.641 | SIGNALING BY GPCR |
| <i>OR52I1</i>   | 10 | 6.64E+03 | 0.641 | SIGNALING BY GPCR |
| <i>OR52L1</i>   | 3  | 1.81E+03 | 0.645 | SIGNALING BY GPCR |
| <i>OR10S1</i>   | 6  | 3.94E+03 | 0.645 | SIGNALING BY GPCR |
| <i>SCT</i>      | 2  | 4.99E+02 | 0.646 | SIGNALING BY GPCR |
| <i>TAS2R19</i>  | 5  | 7.01E+03 | 0.647 | SIGNALING BY GPCR |
| <i>PRLHR</i>    | 3  | 3.97E+02 | 0.648 | SIGNALING BY GPCR |
| <i>GUCA1C</i>   | 3  | 5.74E+02 | 0.649 | SIGNALING BY GPCR |
| <i>TAAR2</i>    | 4  | 5.91E+02 | 0.650 | SIGNALING BY GPCR |
| <i>OR9Q1</i>    | 15 | 9.51E+03 | 0.650 | SIGNALING BY GPCR |
| <i>OR1E1</i>    | 3  | 2.54E+03 | 0.651 | SIGNALING BY GPCR |
| <i>PDE1B</i>    | 4  | 1.13E+03 | 0.652 | SIGNALING BY GPCR |
| <i>TAS2R1</i>   | 2  | 7.80E+02 | 0.653 | SIGNALING BY GPCR |
| <i>CCKAR</i>    | 3  | 1.40E+03 | 0.653 | SIGNALING BY GPCR |
| <i>OR2T12</i>   | 16 | 1.99E+04 | 0.654 | SIGNALING BY GPCR |
| <i>CASR</i>     | 6  | 2.50E+03 | 0.656 | SIGNALING BY GPCR |
| <i>PRKCB</i>    | 4  | 1.14E+03 | 0.657 | SIGNALING BY GPCR |
| <i>OR2F2</i>    | 2  | 1.37E+03 | 0.658 | SIGNALING BY GPCR |
| <i>GRK6</i>     | 5  | 1.20E+03 | 0.658 | SIGNALING BY GPCR |
| <i>OPN5</i>     | 2  | 3.82E+02 | 0.658 | SIGNALING BY GPCR |
| <i>OR8K3</i>    | 5  | 1.88E+03 | 0.661 | SIGNALING BY GPCR |
| <i>MTNR1A</i>   | 7  | 5.22E+03 | 0.662 | SIGNALING BY GPCR |
| <i>P2RY12</i>   | 2  | 2.55E+02 | 0.662 | SIGNALING BY GPCR |
| <i>OR10H1</i>   | 3  | 1.30E+03 | 0.663 | SIGNALING BY GPCR |
| <i>GRM8</i>     | 3  | 4.28E+02 | 0.664 | SIGNALING BY GPCR |
| <i>OR6C4</i>    | 5  | 3.23E+03 | 0.664 | SIGNALING BY GPCR |
| <i>HCAR3</i>    | 7  | 1.20E+03 | 0.665 | SIGNALING BY GPCR |
| <i>OPRL1</i>    | 12 | 7.90E+03 | 0.665 | SIGNALING BY GPCR |
| <i>OR10C1</i>   | 18 | 5.64E+04 | 0.665 | SIGNALING BY GPCR |
| <i>OR11H2</i>   | 14 | 1.69E+04 | 0.666 | SIGNALING BY GPCR |
| <i>NPFFR2</i>   | 4  | 6.97E+02 | 0.666 | SIGNALING BY GPCR |
| <i>OR4E1</i>    | 4  | 2.47E+03 | 0.667 | SIGNALING BY GPCR |
| <i>PIK3R5</i>   | 11 | 3.13E+03 | 0.668 | SIGNALING BY GPCR |
| <i>PTCH2</i>    | 8  | 6.06E+03 | 0.668 | SIGNALING BY GPCR |
| <i>HCRT</i>     | 1  | 2.83E+01 | 0.670 | SIGNALING BY GPCR |
| <i>ROCK2</i>    | 8  | 3.46E+03 | 0.671 | SIGNALING BY GPCR |
| <i>FPR3</i>     | 1  | 7.26E+01 | 0.671 | SIGNALING BY GPCR |
| <i>RDH12</i>    | 3  | 4.19E+02 | 0.672 | SIGNALING BY GPCR |
| <i>OR52N1</i>   | 1  | 3.48E+01 | 0.673 | SIGNALING BY GPCR |
| <i>OR8K5</i>    | 5  | 1.54E+03 | 0.674 | SIGNALING BY GPCR |
| <i>OR1E2</i>    | 2  | 3.85E+02 | 0.678 | SIGNALING BY GPCR |
| <i>GNAI2</i>    | 2  | 6.18E+02 | 0.679 | SIGNALING BY GPCR |
| <i>OR5B21</i>   | 5  | 1.02E+03 | 0.680 | SIGNALING BY GPCR |
| <i>CREB1</i>    | 1  | 5.55E+01 | 0.681 | SIGNALING BY GPCR |
| <i>S1PR3</i>    | 8  | 6.21E+03 | 0.682 | SIGNALING BY GPCR |
| <i>MCHR1</i>    | 7  | 6.51E+03 | 0.683 | SIGNALING BY GPCR |
| <i>OR51G2</i>   | 5  | 1.25E+03 | 0.684 | SIGNALING BY GPCR |
| <i>CXCL16</i>   | 5  | 1.84E+03 | 0.684 | SIGNALING BY GPCR |
| <i>VAV1</i>     | 3  | 1.50E+03 | 0.684 | SIGNALING BY GPCR |
| <i>OR6C68</i>   | 5  | 1.94E+03 | 0.685 | SIGNALING BY GPCR |
| <i>OR2B11</i>   | 4  | 1.71E+03 | 0.685 | SIGNALING BY GPCR |
| <i>FZD10</i>    | 4  | 5.13E+02 | 0.686 | SIGNALING BY GPCR |
| <i>ARHGEF25</i> | 8  | 1.10E+03 | 0.687 | SIGNALING BY GPCR |
| <i>FZD6</i>     | 4  | 1.31E+03 | 0.687 | SIGNALING BY GPCR |
| <i>OR52A1</i>   | 3  | 1.98E+03 | 0.687 | SIGNALING BY GPCR |
| <i>OR4C6</i>    | 8  | 2.31E+03 | 0.688 | SIGNALING BY GPCR |
| <i>CCL28</i>    | 1  | 5.41E+01 | 0.688 | SIGNALING BY GPCR |
| <i>ARHGEF7</i>  | 4  | 1.79E+03 | 0.689 | SIGNALING BY GPCR |
| <i>P2RY14</i>   | 2  | 2.63E+02 | 0.689 | SIGNALING BY GPCR |
| <i>F2RL3</i>    | 9  | 2.92E+03 | 0.689 | SIGNALING BY GPCR |
| <i>OR5D14</i>   | 4  | 1.07E+03 | 0.689 | SIGNALING BY GPCR |
| <i>OR1L8</i>    | 8  | 2.13E+03 | 0.689 | SIGNALING BY GPCR |
| <i>CCR5</i>     | 10 | 4.76E+03 | 0.692 | SIGNALING BY GPCR |
| <i>RLN3</i>     | 1  | 2.75E+02 | 0.693 | SIGNALING BY GPCR |
| <i>C3</i>       | 10 | 2.84E+03 | 0.694 | SIGNALING BY GPCR |
| <i>OR52K2</i>   | 8  | 7.60E+03 | 0.694 | SIGNALING BY GPCR |
| <i>CAMK2D</i>   | 3  | 9.19E+02 | 0.695 | SIGNALING BY GPCR |
| <i>NPBWR2</i>   | 7  | 2.09E+03 | 0.695 | SIGNALING BY GPCR |

|         |    |          |       |                   |
|---------|----|----------|-------|-------------------|
| OR5B3   | 4  | 1.97E+03 | 0.696 | SIGNALING BY GPCR |
| GRK5    | 6  | 2.80E+03 | 0.696 | SIGNALING BY GPCR |
| NPY1R   | 4  | 1.41E+03 | 0.698 | SIGNALING BY GPCR |
| CCR8    | 2  | 5.78E+02 | 0.698 | SIGNALING BY GPCR |
| TAS2R9  | 5  | 2.99E+03 | 0.701 | SIGNALING BY GPCR |
| PPP2R1B | 5  | 2.89E+03 | 0.702 | SIGNALING BY GPCR |
| DAGLB   | 12 | 1.04E+04 | 0.703 | SIGNALING BY GPCR |
| TAS2R4  | 4  | 9.02E+02 | 0.703 | SIGNALING BY GPCR |
| HTR4    | 4  | 9.27E+02 | 0.703 | SIGNALING BY GPCR |
| OR7E24  | 5  | 1.53E+03 | 0.705 | SIGNALING BY GPCR |
| CCR10   | 1  | 1.64E+02 | 0.705 | SIGNALING BY GPCR |
| EDN1    | 7  | 9.31E+02 | 0.706 | SIGNALING BY GPCR |
| SDC3    | 5  | 2.33E+03 | 0.706 | SIGNALING BY GPCR |
| PDE4A   | 6  | 1.16E+03 | 0.707 | SIGNALING BY GPCR |
| PLXNB1  | 14 | 5.74E+03 | 0.709 | SIGNALING BY GPCR |
| ADGRE1  | 15 | 1.47E+04 | 0.709 | SIGNALING BY GPCR |
| MLN     | 4  | 7.34E+02 | 0.710 | SIGNALING BY GPCR |
| UTS2R   | 5  | 2.45E+03 | 0.712 | SIGNALING BY GPCR |
| OR4F4   | 4  | 1.89E+03 | 0.713 | SIGNALING BY GPCR |
| OR2T35  | 1  | 4.10E+01 | 0.713 | SIGNALING BY GPCR |
| HTR7    | 3  | 2.25E+03 | 0.713 | SIGNALING BY GPCR |
| OR51B2  | 3  | 2.60E+02 | 0.714 | SIGNALING BY GPCR |
| CALCA   | 3  | 5.33E+03 | 0.716 | SIGNALING BY GPCR |
| ADORA3  | 3  | 1.40E+03 | 0.716 | SIGNALING BY GPCR |
| GRM1    | 9  | 1.10E+04 | 0.716 | SIGNALING BY GPCR |
| CCL4    | 3  | 1.12E+03 | 0.717 | SIGNALING BY GPCR |
| TAS2R20 | 1  | 2.15E+01 | 0.717 | SIGNALING BY GPCR |
| XCR1    | 2  | 6.45E+02 | 0.718 | SIGNALING BY GPCR |
| OR51S1  | 4  | 2.83E+03 | 0.718 | SIGNALING BY GPCR |
| GNB2    | 1  | 3.27E+01 | 0.721 | SIGNALING BY GPCR |
| CXCR2   | 5  | 9.70E+02 | 0.723 | SIGNALING BY GPCR |
| PDE3A   | 6  | 2.14E+03 | 0.723 | SIGNALING BY GPCR |
| RGS14   | 2  | 2.20E+02 | 0.723 | SIGNALING BY GPCR |
| CXCL10  | 1  | 3.16E+02 | 0.723 | SIGNALING BY GPCR |
| OR5H2   | 3  | 2.08E+03 | 0.724 | SIGNALING BY GPCR |
| TTR     | 1  | 1.45E+02 | 0.724 | SIGNALING BY GPCR |
| CYP4V2  | 6  | 1.06E+03 | 0.727 | SIGNALING BY GPCR |
| VAV3    | 11 | 3.52E+03 | 0.728 | SIGNALING BY GPCR |
| OR11H6  | 4  | 2.54E+03 | 0.729 | SIGNALING BY GPCR |
| SSTR2   | 2  | 1.37E+02 | 0.730 | SIGNALING BY GPCR |
| OR6S1   | 3  | 3.18E+03 | 0.731 | SIGNALING BY GPCR |
| OR10G4  | 12 | 7.39E+03 | 0.732 | SIGNALING BY GPCR |
| NTSR1   | 15 | 7.46E+03 | 0.732 | SIGNALING BY GPCR |
| OR52E2  | 4  | 2.37E+03 | 0.732 | SIGNALING BY GPCR |
| MMP3    | 3  | 2.63E+02 | 0.734 | SIGNALING BY GPCR |
| OR8B4   | 2  | 9.72E+02 | 0.737 | SIGNALING BY GPCR |
| OR2F1   | 6  | 3.08E+03 | 0.738 | SIGNALING BY GPCR |
| OR10A5  | 3  | 9.74E+02 | 0.739 | SIGNALING BY GPCR |
| PYY     | 1  | 3.07E+01 | 0.741 | SIGNALING BY GPCR |
| PRKACG  | 1  | 3.70E+01 | 0.742 | SIGNALING BY GPCR |
| OR4D9   | 7  | 3.63E+03 | 0.743 | SIGNALING BY GPCR |
| RGS11   | 9  | 5.23E+03 | 0.743 | SIGNALING BY GPCR |
| GRM2    | 10 | 2.77E+03 | 0.744 | SIGNALING BY GPCR |
| HCAR2   | 4  | 7.46E+02 | 0.746 | SIGNALING BY GPCR |
| EDNRB   | 4  | 4.16E+03 | 0.746 | SIGNALING BY GPCR |
| RGS5    | 3  | 4.25E+02 | 0.747 | SIGNALING BY GPCR |
| RDH8    | 5  | 2.02E+03 | 0.748 | SIGNALING BY GPCR |
| PPP2R1A | 1  | 1.55E+02 | 0.748 | SIGNALING BY GPCR |
| RASGRP2 | 4  | 6.70E+02 | 0.753 | SIGNALING BY GPCR |
| OR2M2   | 6  | 1.85E+03 | 0.753 | SIGNALING BY GPCR |
| GAL     | 2  | 9.09E+02 | 0.754 | SIGNALING BY GPCR |
| OR4C46  | 6  | 6.25E+03 | 0.757 | SIGNALING BY GPCR |
| OR6M1   | 3  | 1.56E+03 | 0.758 | SIGNALING BY GPCR |
| OR5AS1  | 5  | 2.04E+03 | 0.761 | SIGNALING BY GPCR |
| LPAR6   | 3  | 1.01E+03 | 0.761 | SIGNALING BY GPCR |
| OR2H2   | 5  | 2.17E+03 | 0.761 | SIGNALING BY GPCR |
| FZD8    | 4  | 4.99E+02 | 0.762 | SIGNALING BY GPCR |
| CLPS    | 3  | 2.40E+03 | 0.764 | SIGNALING BY GPCR |
| PNLIP   | 2  | 8.11E+01 | 0.766 | SIGNALING BY GPCR |
| RGS8    | 1  | 2.17E+01 | 0.767 | SIGNALING BY GPCR |
| PLB1    | 28 | 1.71E+04 | 0.768 | SIGNALING BY GPCR |
| REEP6   | 3  | 3.03E+02 | 0.770 | SIGNALING BY GPCR |
| GRK2    | 1  | 1.91E+01 | 0.770 | SIGNALING BY GPCR |
| OPN3    | 12 | 3.26E+03 | 0.770 | SIGNALING BY GPCR |

|          |    |          |       |                   |
|----------|----|----------|-------|-------------------|
| ARHGEF19 | 11 | 4.36E+03 | 0.772 | SIGNALING BY GPCR |
| PDPK1    | 1  | 2.60E+01 | 0.773 | SIGNALING BY GPCR |
| TAS2R41  | 4  | 5.80E+02 | 0.773 | SIGNALING BY GPCR |
| TAS1R2   | 10 | 2.99E+03 | 0.773 | SIGNALING BY GPCR |
| NTSR2    | 7  | 2.75E+03 | 0.775 | SIGNALING BY GPCR |
| OR56A3   | 4  | 3.64E+02 | 0.777 | SIGNALING BY GPCR |
| WNT2B    | 6  | 1.22E+03 | 0.777 | SIGNALING BY GPCR |
| OR4F6    | 4  | 1.83E+03 | 0.780 | SIGNALING BY GPCR |
| OR6Q1    | 2  | 1.05E+03 | 0.780 | SIGNALING BY GPCR |
| LHB      | 3  | 1.75E+03 | 0.780 | SIGNALING BY GPCR |
| OR8G1    | 3  | 2.80E+02 | 0.780 | SIGNALING BY GPCR |
| PRKACA   | 4  | 1.16E+03 | 0.781 | SIGNALING BY GPCR |
| FZD2     | 4  | 1.70E+03 | 0.783 | SIGNALING BY GPCR |
| OR4D5    | 6  | 1.25E+03 | 0.783 | SIGNALING BY GPCR |
| GNAL     | 2  | 2.91E+02 | 0.784 | SIGNALING BY GPCR |
| TRPC6    | 3  | 2.16E+02 | 0.784 | SIGNALING BY GPCR |
| OR5A2    | 1  | 1.35E+02 | 0.785 | SIGNALING BY GPCR |
| OR52Z1   | 11 | 7.37E+03 | 0.785 | SIGNALING BY GPCR |
| VIPR1    | 6  | 9.78E+02 | 0.785 | SIGNALING BY GPCR |
| GPC5     | 6  | 5.78E+02 | 0.787 | SIGNALING BY GPCR |
| ADORA2B  | 2  | 8.40E+01 | 0.789 | SIGNALING BY GPCR |
| RXFP1    | 3  | 2.71E+02 | 0.792 | SIGNALING BY GPCR |
| DHRS9    | 3  | 5.98E+02 | 0.792 | SIGNALING BY GPCR |
| ARHGEF10 | 13 | 5.70E+03 | 0.792 | SIGNALING BY GPCR |
| OR6N1    | 4  | 7.18E+03 | 0.794 | SIGNALING BY GPCR |
| ARHGEF11 | 13 | 5.95E+03 | 0.794 | SIGNALING BY GPCR |
| CX3CR1   | 7  | 2.48E+03 | 0.795 | SIGNALING BY GPCR |
| OR6B3    | 7  | 3.57E+03 | 0.796 | SIGNALING BY GPCR |
| CXCL12   | 2  | 1.32E+02 | 0.797 | SIGNALING BY GPCR |
| WNT9B    | 4  | 6.78E+02 | 0.797 | SIGNALING BY GPCR |
| LDLR     | 6  | 1.07E+03 | 0.798 | SIGNALING BY GPCR |
| GPR150   | 4  | 3.15E+02 | 0.800 | SIGNALING BY GPCR |
| OR2G3    | 7  | 1.21E+03 | 0.800 | SIGNALING BY GPCR |
| APOM     | 2  | 5.64E+02 | 0.800 | SIGNALING BY GPCR |
| OR6B1    | 8  | 1.30E+03 | 0.802 | SIGNALING BY GPCR |
| OR5M1    | 6  | 1.30E+03 | 0.804 | SIGNALING BY GPCR |
| GNAT3    | 4  | 1.26E+03 | 0.804 | SIGNALING BY GPCR |
| PDYN     | 5  | 1.17E+03 | 0.806 | SIGNALING BY GPCR |
| OR2AG1   | 3  | 3.85E+02 | 0.806 | SIGNALING BY GPCR |
| PDE3B    | 10 | 2.26E+03 | 0.807 | SIGNALING BY GPCR |
| ARHGEF1  | 3  | 3.07E+02 | 0.808 | SIGNALING BY GPCR |
| LRP12    | 6  | 9.60E+02 | 0.808 | SIGNALING BY GPCR |
| GNA12    | 4  | 4.30E+03 | 0.809 | SIGNALING BY GPCR |
| HCRTR2   | 4  | 1.35E+03 | 0.809 | SIGNALING BY GPCR |
| OR1G1    | 2  | 2.31E+02 | 0.809 | SIGNALING BY GPCR |
| PTGDR2   | 4  | 1.53E+02 | 0.809 | SIGNALING BY GPCR |
| OR2B2    | 1  | 2.16E+02 | 0.809 | SIGNALING BY GPCR |
| SHH      | 2  | 1.20E+02 | 0.810 | SIGNALING BY GPCR |
| RGS2     | 4  | 8.86E+02 | 0.811 | SIGNALING BY GPCR |
| OR4C15   | 7  | 2.26E+03 | 0.812 | SIGNALING BY GPCR |
| RBP3     | 13 | 1.99E+03 | 0.812 | SIGNALING BY GPCR |
| GPSM2    | 3  | 8.14E+02 | 0.813 | SIGNALING BY GPCR |
| OR5B12   | 10 | 1.90E+03 | 0.813 | SIGNALING BY GPCR |
| OR2A7    | 9  | 2.77E+03 | 0.814 | SIGNALING BY GPCR |
| RTP2     | 3  | 1.49E+02 | 0.815 | SIGNALING BY GPCR |
| AGTR1    | 4  | 5.93E+02 | 0.816 | SIGNALING BY GPCR |
| PDE4B    | 1  | 2.08E+02 | 0.818 | SIGNALING BY GPCR |
| NPY4R    | 6  | 8.62E+02 | 0.818 | SIGNALING BY GPCR |
| OXER1    | 9  | 7.23E+03 | 0.819 | SIGNALING BY GPCR |
| RXFP2    | 8  | 4.25E+03 | 0.819 | SIGNALING BY GPCR |
| OR1A1    | 3  | 2.62E+02 | 0.820 | SIGNALING BY GPCR |
| PDE6A    | 13 | 2.08E+03 | 0.820 | SIGNALING BY GPCR |
| OR51H1   | 4  | 3.22E+02 | 0.820 | SIGNALING BY GPCR |
| RHO      | 1  | 1.37E+01 | 0.821 | SIGNALING BY GPCR |
| APOE     | 4  | 4.35E+02 | 0.821 | SIGNALING BY GPCR |
| ARHGEF12 | 7  | 3.74E+03 | 0.821 | SIGNALING BY GPCR |
| ADGRE2   | 14 | 7.81E+03 | 0.823 | SIGNALING BY GPCR |
| OR13G1   | 4  | 8.32E+02 | 0.824 | SIGNALING BY GPCR |
| OR4F15   | 5  | 3.05E+03 | 0.825 | SIGNALING BY GPCR |
| OR2L5    | 7  | 1.61E+03 | 0.826 | SIGNALING BY GPCR |
| OR12D3   | 6  | 2.67E+02 | 0.830 | SIGNALING BY GPCR |
| OR5K2    | 5  | 1.70E+03 | 0.830 | SIGNALING BY GPCR |
| AGT      | 12 | 1.42E+03 | 0.831 | SIGNALING BY GPCR |
| OXTR     | 5  | 1.39E+03 | 0.831 | SIGNALING BY GPCR |

|          |    |          |       |                   |
|----------|----|----------|-------|-------------------|
| OR11G2   | 5  | 3.48E+02 | 0.832 | SIGNALING BY GPCR |
| TAS2R60  | 2  | 3.80E+02 | 0.833 | SIGNALING BY GPCR |
| PDE1C    | 7  | 2.41E+03 | 0.833 | SIGNALING BY GPCR |
| GLP1R    | 8  | 1.62E+03 | 0.834 | SIGNALING BY GPCR |
| OR4D10   | 4  | 7.66E+02 | 0.837 | SIGNALING BY GPCR |
| DGKI     | 5  | 5.60E+02 | 0.837 | SIGNALING BY GPCR |
| FNTB     | 3  | 1.89E+02 | 0.838 | SIGNALING BY GPCR |
| METAP2   | 1  | 8.95E+00 | 0.838 | SIGNALING BY GPCR |
| OR6T1    | 8  | 4.06E+03 | 0.838 | SIGNALING BY GPCR |
| RGS20    | 5  | 8.07E+02 | 0.840 | SIGNALING BY GPCR |
| NAPEPLD  | 2  | 4.20E+02 | 0.841 | SIGNALING BY GPCR |
| BCO2     | 9  | 1.92E+03 | 0.841 | SIGNALING BY GPCR |
| OR8A1    | 4  | 1.88E+02 | 0.841 | SIGNALING BY GPCR |
| HTR2A    | 4  | 1.62E+03 | 0.843 | SIGNALING BY GPCR |
| RGR      | 5  | 3.68E+02 | 0.844 | SIGNALING BY GPCR |
| GUCY2D   | 10 | 2.53E+03 | 0.844 | SIGNALING BY GPCR |
| ARHGEF2  | 1  | 9.02E+00 | 0.845 | SIGNALING BY GPCR |
| NMT2     | 4  | 5.68E+02 | 0.847 | SIGNALING BY GPCR |
| SSTR1    | 1  | 5.80E+00 | 0.848 | SIGNALING BY GPCR |
| TAS2R5   | 7  | 2.55E+03 | 0.849 | SIGNALING BY GPCR |
| GNRH2    | 3  | 4.53E+02 | 0.850 | SIGNALING BY GPCR |
| AGRN     | 42 | 1.24E+04 | 0.851 | SIGNALING BY GPCR |
| OR10P1   | 3  | 2.01E+02 | 0.851 | SIGNALING BY GPCR |
| RPS6KA2  | 3  | 6.28E+02 | 0.851 | SIGNALING BY GPCR |
| ECE1     | 3  | 6.76E+02 | 0.852 | SIGNALING BY GPCR |
| EDN3     | 1  | 7.52E+00 | 0.854 | SIGNALING BY GPCR |
| OR52H1   | 4  | 4.15E+03 | 0.856 | SIGNALING BY GPCR |
| HRH1     | 6  | 6.30E+02 | 0.857 | SIGNALING BY GPCR |
| HTR1F    | 1  | 4.98E+01 | 0.857 | SIGNALING BY GPCR |
| RTP5     | 12 | 3.64E+03 | 0.857 | SIGNALING BY GPCR |
| HSD17B6  | 4  | 2.70E+02 | 0.858 | SIGNALING BY GPCR |
| OR4D11   | 1  | 5.81E+00 | 0.859 | SIGNALING BY GPCR |
| OR7A17   | 4  | 9.63E+02 | 0.860 | SIGNALING BY GPCR |
| OR7D2    | 2  | 4.06E+01 | 0.862 | SIGNALING BY GPCR |
| FZD1     | 3  | 2.57E+02 | 0.863 | SIGNALING BY GPCR |
| OR5H14   | 17 | 3.63E+03 | 0.864 | SIGNALING BY GPCR |
| CALCRL   | 1  | 2.34E+01 | 0.864 | SIGNALING BY GPCR |
| RHOC     | 1  | 1.42E+01 | 0.868 | SIGNALING BY GPCR |
| OR2H1    | 13 | 1.94E+03 | 0.868 | SIGNALING BY GPCR |
| GNG13    | 1  | 3.52E+00 | 0.869 | SIGNALING BY GPCR |
| GPR65    | 1  | 6.27E+00 | 0.870 | SIGNALING BY GPCR |
| PTGER2   | 2  | 1.14E+03 | 0.871 | SIGNALING BY GPCR |
| OR10H2   | 6  | 3.67E+02 | 0.872 | SIGNALING BY GPCR |
| OR5AK2   | 1  | 6.11E+00 | 0.873 | SIGNALING BY GPCR |
| AVPR1A   | 4  | 1.37E+03 | 0.875 | SIGNALING BY GPCR |
| OR51F2   | 5  | 4.28E+02 | 0.875 | SIGNALING BY GPCR |
| ADCY1    | 6  | 8.93E+02 | 0.875 | SIGNALING BY GPCR |
| GNB4     | 1  | 2.78E+01 | 0.877 | SIGNALING BY GPCR |
| MTNR1B   | 6  | 4.84E+02 | 0.878 | SIGNALING BY GPCR |
| OR4A16   | 3  | 1.70E+02 | 0.883 | SIGNALING BY GPCR |
| OR52M1   | 5  | 2.28E+02 | 0.884 | SIGNALING BY GPCR |
| OR4K1    | 6  | 9.51E+02 | 0.884 | SIGNALING BY GPCR |
| CHRM5    | 6  | 2.85E+02 | 0.885 | SIGNALING BY GPCR |
| OR51V1   | 10 | 6.66E+02 | 0.887 | SIGNALING BY GPCR |
| CCL4L2   | 5  | 1.74E+03 | 0.890 | SIGNALING BY GPCR |
| MC1R     | 17 | 2.05E+03 | 0.891 | SIGNALING BY GPCR |
| GNG2     | 1  | 3.16E+00 | 0.894 | SIGNALING BY GPCR |
| TSHR     | 5  | 4.59E+02 | 0.895 | SIGNALING BY GPCR |
| INSL3    | 6  | 1.27E+03 | 0.899 | SIGNALING BY GPCR |
| OR51A2   | 1  | 2.19E+00 | 0.900 | SIGNALING BY GPCR |
| PTGER3   | 1  | 1.97E+01 | 0.901 | SIGNALING BY GPCR |
| GRK1     | 9  | 1.78E+03 | 0.903 | SIGNALING BY GPCR |
| CD55     | 5  | 1.70E+02 | 0.906 | SIGNALING BY GPCR |
| HTR1E    | 1  | 7.94E+00 | 0.909 | SIGNALING BY GPCR |
| OR3A2    | 10 | 1.09E+03 | 0.910 | SIGNALING BY GPCR |
| TAS2R8   | 7  | 9.41E+02 | 0.911 | SIGNALING BY GPCR |
| CHRM4    | 1  | 2.02E+00 | 0.914 | SIGNALING BY GPCR |
| TRIO     | 15 | 4.56E+03 | 0.925 | SIGNALING BY GPCR |
| AVP      | 1  | 7.11E-01 | 0.976 | SIGNALING BY GPCR |
| ARHGEF35 | 1  | 3.27E-01 | 0.978 | SIGNALING BY GPCR |
| OR13A1   | 1  | 1.40E+00 | 0.978 | SIGNALING BY GPCR |
| DRD3     | 1  | 1.26E-01 | 0.982 | SIGNALING BY GPCR |
| ADRA2C   | 1  | 5.32E-02 | 0.983 | SIGNALING BY GPCR |
| WNT6     | 1  | 1.78E-01 | 0.987 | SIGNALING BY GPCR |

|         |     |          |          |                   |
|---------|-----|----------|----------|-------------------|
| PTGER4  | 1   | 2.47E-01 | 0.993    | SIGNALING BY GPCR |
| METAP1  | 1   | 7.27E-05 | 0.999652 | SIGNALING BY GPCR |
| RCVRN   | 1   | 6.78E-06 | 0.999889 | SIGNALING BY GPCR |
| FGD4    | 8   | 3.42E+03 | 1        | SIGNALING BY GPCR |
| OR5F1   | 10  | 5.21E+03 | 1        | SIGNALING BY GPCR |
| CHRM3   | 3   | 2.38E+02 | 1        | SIGNALING BY GPCR |
| CAMKK2  | 3   | 1.82E+02 | 1        | SIGNALING BY GPCR |
| C5AR2   | 2   | 3.91E+01 | 1        | SIGNALING BY GPCR |
| GNAI1   | 2   | 3.43E+01 | 1        | SIGNALING BY GPCR |
| OR1A2   | 2   | 2.06E+01 | 1        | SIGNALING BY GPCR |
| PRKAR2A | 3   | 1.38E+01 | 1        | SIGNALING BY GPCR |
| TAS2R3  | 2   | 5.83E+01 | 1        | SIGNALING BY GPCR |
| OR10A4  | 6   | 9.97E+01 | 1        | SIGNALING BY GPCR |
| HTR6    | 6   | 5.49E+01 | 1        | SIGNALING BY GPCR |
| OR2M4   | 3   | 1.60E+02 | 1        | SIGNALING BY GPCR |
| DGKA    | 5   | 2.23E+02 | 1        | SIGNALING BY GPCR |
| PDE6B   | 11  | 2.77E+02 | 1        | SIGNALING BY GPCR |
| OBSCN   | 153 | 2.21E+04 | 1        | SIGNALING BY GPCR |
| OR2T34  | 2   | 8.82E+01 | 1        | SIGNALING BY GPCR |
| OXGR1   | 2   | 1.50E+02 | 1        | SIGNALING BY GPCR |
| PTH2R   | 7   | 1.16E+02 | 1        | SIGNALING BY GPCR |
| P2RY2   | 6   | 1.00E+01 | 1        | SIGNALING BY GPCR |
| HSD17B1 | 4   | 1.43E+02 | 1        | SIGNALING BY GPCR |
| ABHD6   | 4   | 4.47E+02 | 1        | SIGNALING BY GPCR |
| SAG     | 4   | 2.27E+01 | 1        | SIGNALING BY GPCR |
| OR13C9  | 3   | 5.02E+00 | 1        | SIGNALING BY GPCR |
| AKAP13  | 28  | 2.50E+03 | 1        | SIGNALING BY GPCR |
| PDE11A  | 13  | 7.28E+03 | 1        | SIGNALING BY GPCR |
| PRKAR2B | 2   | 5.58E+01 | 1        | SIGNALING BY GPCR |
| HRAS    | 3   | 3.32E+00 | 1        | SIGNALING BY GPCR |
| NMUR1   | 8   | 8.72E+01 | 1        | SIGNALING BY GPCR |
| OR2B6   | 3   | 9.22E+02 | 1        | SIGNALING BY GPCR |
| OR11A1  | 5   | 9.70E+02 | 1        | SIGNALING BY GPCR |
| ACKR1   | 5   | 1.40E+03 | 1        | SIGNALING BY GPCR |
| SLC24A1 | 9   | 2.41E+03 | 1        | SIGNALING BY GPCR |
| OR5AC2  | 5   | 5.86E+02 | 1        | SIGNALING BY GPCR |
| LPAR3   | 2   | 2.37E+01 | 1        | SIGNALING BY GPCR |
| WNT10A  | 9   | 2.00E+03 | 1        | SIGNALING BY GPCR |
| DRD1    | 2   | 6.12E-01 | 1        | SIGNALING BY GPCR |
| HRH4    | 2   | 5.02E+01 | 1        | SIGNALING BY GPCR |
| RGS19   | 2   | 2.49E+02 | 1        | SIGNALING BY GPCR |
| GNA15   | 3   | 1.19E+02 | 1        | SIGNALING BY GPCR |
| HCAR1   | 4   | 4.89E+01 | 1        | SIGNALING BY GPCR |
| CAMK4   | 3   | 4.67E+01 | 1        | SIGNALING BY GPCR |
| GNA14   | 6   | 2.07E+03 | 1        | SIGNALING BY GPCR |
| ADGRE3  | 8   | 4.95E+02 | 1        | SIGNALING BY GPCR |
| GPSM3   | 2   | 2.55E+02 | 1        | SIGNALING BY GPCR |
| GNGT1   | 2   | 9.38E-01 | 1        | SIGNALING BY GPCR |
| OR51E1  | 6   | 1.85E+03 | 1        | SIGNALING BY GPCR |
| WNT1    | 3   | 7.98E+01 | 1        | SIGNALING BY GPCR |
| TRPC3   | 4   | 3.31E+01 | 1        | SIGNALING BY GPCR |
| XCL2    | 3   | 6.32E+00 | 1        | SIGNALING BY GPCR |
| PPY     | 2   | 8.53E+00 | 1        | SIGNALING BY GPCR |
| DGKG    | 6   | 3.85E+01 | 1        | SIGNALING BY GPCR |
| WNT16   | 2   | 4.00E+01 | 1        | SIGNALING BY GPCR |
| ADRA2B  | 3   | 7.47E+01 | 1        | SIGNALING BY GPCR |
| ECE2    | 4   | 4.03E+01 | 1        | SIGNALING BY GPCR |
| GPC6    | 5   | 6.15E+00 | 1        | SIGNALING BY GPCR |
| LRP1    | 26  | 1.45E+04 | 1        | SIGNALING BY GPCR |
| TAS2R7  | 5   | 2.20E+03 | 1        | SIGNALING BY GPCR |
| OR1L4   | 5   | 1.47E+03 | 1        | SIGNALING BY GPCR |
| ADCY9   | 10  | 5.10E+03 | 1        | SIGNALING BY GPCR |
| XCL1    | 3   | 4.48E+02 | 1        | SIGNALING BY GPCR |
| BDKRB2  | 2   | 6.28E+00 | 1        | SIGNALING BY GPCR |
| MAPK3   | 5   | 2.78E+01 | 1        | SIGNALING BY GPCR |
| TAS2R10 | 2   | 2.87E+02 | 1        | SIGNALING BY GPCR |
| OR10A7  | 4   | 2.06E+00 | 1        | SIGNALING BY GPCR |
| GPR37L1 | 5   | 1.85E+02 | 1        | SIGNALING BY GPCR |
| OR2A5   | 3   | 8.65E+00 | 1        | SIGNALING BY GPCR |
| GPR15   | 6   | 6.87E+02 | 1        | SIGNALING BY GPCR |
| NMS     | 2   | 1.15E+00 | 1        | SIGNALING BY GPCR |
| OR5K4   | 7   | 3.43E+02 | 1        | SIGNALING BY GPCR |
| OR5H15  | 11  | 1.93E+02 | 1        | SIGNALING BY GPCR |
| OR2AE1  | 6   | 7.13E+02 | 1        | SIGNALING BY GPCR |

|         |    |          |    |                   |
|---------|----|----------|----|-------------------|
| OR4A15  | 5  | 4.98E+02 | 1  | SIGNALING BY GPCR |
| OR4A5   | 8  | 1.49E+01 | 1  | SIGNALING BY GPCR |
| OR2B3   | 3  | 7.22E+01 | 1  | SIGNALING BY GPCR |
| OR7G1   | 7  | 1.87E+03 | 1  | SIGNALING BY GPCR |
| OR6Y1   | 13 | 1.49E+02 | 1  | SIGNALING BY GPCR |
| OR6K6   | 14 | 2.50E+03 | 1  | SIGNALING BY GPCR |
| OR6C1   | 3  | 4.28E+02 | 1  | SIGNALING BY GPCR |
| OR52E8  | 2  | 8.29E+01 | 1  | SIGNALING BY GPCR |
| OR51I2  | 5  | 4.31E+02 | 1  | SIGNALING BY GPCR |
| OR51F1  | 2  | 3.37E+00 | 1  | SIGNALING BY GPCR |
| OR5T2   | 2  | 1.19E+03 | 1  | SIGNALING BY GPCR |
| OR5M9   | 3  | 5.09E+00 | 1  | SIGNALING BY GPCR |
| OR5M3   | 6  | 3.08E+01 | 1  | SIGNALING BY GPCR |
| OR4K17  | 4  | 6.69E+01 | 1  | SIGNALING BY GPCR |
| OR10H5  | 5  | 3.10E+03 | 1  | SIGNALING BY GPCR |
| OR10G7  | 11 | 1.56E+03 | 1  | SIGNALING BY GPCR |
| OR10A6  | 2  | 2.07E+00 | 1  | SIGNALING BY GPCR |
| OR52B2  | 6  | 1.54E+02 | 1  | SIGNALING BY GPCR |
| OR8D1   | 4  | 2.83E+03 | 1  | SIGNALING BY GPCR |
| OR5D13  | 5  | 5.20E+01 | 1  | SIGNALING BY GPCR |
| OR14A16 | 4  | 4.56E+01 | 1  | SIGNALING BY GPCR |
| OR13C3  | 2  | 3.23E+01 | 1  | SIGNALING BY GPCR |
| FZD9    | 2  | 1.43E+01 | 1  | SIGNALING BY GPCR |
| OR4K5   | 2  | NA       | NA | SIGNALING BY GPCR |

b) LOSS OF FUNCTION VARIANTS

| Gene   | NumVar | Q       | Pvalue   | Gene-set                                |
|--------|--------|---------|----------|-----------------------------------------|
| PRKAA1 | 2      | 45240.8 | 4.48E-04 | ACTIVATION OF AMPK DOWNSTREAM OF NMDARS |
| TUBA8  | 1      | 8840.23 | 0.121    | ACTIVATION OF AMPK DOWNSTREAM OF NMDARS |
| CAMKK2 | 5      | 1881.68 | 0.294    | ACTIVATION OF AMPK DOWNSTREAM OF NMDARS |
| MAPT   | 1      | 208.046 | 0.324    | ACTIVATION OF AMPK DOWNSTREAM OF NMDARS |
| TUBA3E | 1      | 188.084 | 0.335    | ACTIVATION OF AMPK DOWNSTREAM OF NMDARS |
| PRKAG3 | 2      | 1665.57 | 0.362    | ACTIVATION OF AMPK DOWNSTREAM OF NMDARS |
| TUBB8  | 1      | 847.717 | 0.390    | ACTIVATION OF AMPK DOWNSTREAM OF NMDARS |
| TUBA1B | 3      | 1949.44 | 0.451    | ACTIVATION OF AMPK DOWNSTREAM OF NMDARS |
| TUBB4A | 1      | 460.836 | 0.476    | ACTIVATION OF AMPK DOWNSTREAM OF NMDARS |
| TUBA3C | 1      | 144.803 | 0.574    | ACTIVATION OF AMPK DOWNSTREAM OF NMDARS |
| PRKAA2 | 2      | 3136.84 | 0.604    | ACTIVATION OF AMPK DOWNSTREAM OF NMDARS |
| TUBB3  | 1      | 81.5899 | 0.632    | ACTIVATION OF AMPK DOWNSTREAM OF NMDARS |
| TUBB1  | 1      | 14.6338 | 0.777    | ACTIVATION OF AMPK DOWNSTREAM OF NMDARS |
| PRKAG2 | 6      | 2036.23 | 0.888    | ACTIVATION OF AMPK DOWNSTREAM OF NMDARS |
| TUBB4B | 1      | 5.99978 | 0.899    | ACTIVATION OF AMPK DOWNSTREAM OF NMDARS |
| TUBB6  | 1      | 2.31435 | 0.912    | ACTIVATION OF AMPK DOWNSTREAM OF NMDARS |

| Gene     | NumVar | Q       | Pvalue   | Gene-set               |
|----------|--------|---------|----------|------------------------|
| SIGLEC11 | 3      | 27478.2 | 4.82E-04 | ADAPTIVE IMMUNE SYSTEM |
| TAB2     | 2      | 12215.6 | 0.003    | ADAPTIVE IMMUNE SYSTEM |
| SMURF1   | 10     | 51528   | 0.003    | ADAPTIVE IMMUNE SYSTEM |
| TRIM39   | 3      | 12377.6 | 0.005    | ADAPTIVE IMMUNE SYSTEM |
| KIF22    | 1      | 28811.9 | 0.005    | ADAPTIVE IMMUNE SYSTEM |
| KIR2DL3  | 5      | 22698.8 | 0.006    | ADAPTIVE IMMUNE SYSTEM |
| PRKN     | 13     | 856826  | 0.008    | ADAPTIVE IMMUNE SYSTEM |
| LILRB3   | 6      | 60487.5 | 0.008    | ADAPTIVE IMMUNE SYSTEM |
| AREL1    | 2      | 4168.91 | 0.010    | ADAPTIVE IMMUNE SYSTEM |
| HLA-G    | 3      | 34362.2 | 0.012    | ADAPTIVE IMMUNE SYSTEM |
| CD300LD  | 1      | 13873.4 | 0.012    | ADAPTIVE IMMUNE SYSTEM |
| PSMA1    | 7      | 40662.6 | 0.012    | ADAPTIVE IMMUNE SYSTEM |
| UBE3B    | 13     | 35820.3 | 0.014    | ADAPTIVE IMMUNE SYSTEM |
| TAP1     | 3      | 24355   | 0.014    | ADAPTIVE IMMUNE SYSTEM |
| DCTN6    | 2      | 7054.79 | 0.014    | ADAPTIVE IMMUNE SYSTEM |
| UBE2D2   | 1      | 1438.9  | 0.017    | ADAPTIVE IMMUNE SYSTEM |
| RASGRP2  | 4      | 5952.39 | 0.019    | ADAPTIVE IMMUNE SYSTEM |
| CDH1     | 4      | 10863   | 0.024    | ADAPTIVE IMMUNE SYSTEM |
| ASB2     | 3      | 10446.4 | 0.024    | ADAPTIVE IMMUNE SYSTEM |
| DYNC1I2  | 6      | 12462.7 | 0.027    | ADAPTIVE IMMUNE SYSTEM |
| ITGA4    | 4      | 4310.77 | 0.029    | ADAPTIVE IMMUNE SYSTEM |
| PIK3R1   | 4      | 4137.19 | 0.030    | ADAPTIVE IMMUNE SYSTEM |
| SEC23A   | 1      | 5107.56 | 0.031    | ADAPTIVE IMMUNE SYSTEM |
| ITK      | 3      | 68614.7 | 0.031    | ADAPTIVE IMMUNE SYSTEM |
| ATG7     | 1      | 1291.91 | 0.033    | ADAPTIVE IMMUNE SYSTEM |
| GRB2     | 1      | 709.939 | 0.034    | ADAPTIVE IMMUNE SYSTEM |
| GAN      | 1      | 3918.47 | 0.039    | ADAPTIVE IMMUNE SYSTEM |
| TYROBP   | 1      | 12608.2 | 0.043    | ADAPTIVE IMMUNE SYSTEM |

|          |    |         |       |                        |
|----------|----|---------|-------|------------------------|
| LILRB4   | 8  | 19013.6 | 0.045 | ADAPTIVE IMMUNE SYSTEM |
| PAK1     | 1  | 851.571 | 0.045 | ADAPTIVE IMMUNE SYSTEM |
| FBXO44   | 4  | 5488.08 | 0.047 | ADAPTIVE IMMUNE SYSTEM |
| KIF26A   | 5  | 32234.4 | 0.050 | ADAPTIVE IMMUNE SYSTEM |
| HECTD1   | 5  | 17292.1 | 0.052 | ADAPTIVE IMMUNE SYSTEM |
| TRAIP    | 2  | 7966.87 | 0.054 | ADAPTIVE IMMUNE SYSTEM |
| FYN      | 6  | 20441   | 0.055 | ADAPTIVE IMMUNE SYSTEM |
| TREML1   | 1  | 10266.6 | 0.059 | ADAPTIVE IMMUNE SYSTEM |
| PIANP    | 1  | 527.582 | 0.066 | ADAPTIVE IMMUNE SYSTEM |
| UBE2E1   | 2  | 4393.88 | 0.069 | ADAPTIVE IMMUNE SYSTEM |
| CTLA4    | 2  | 2154.34 | 0.069 | ADAPTIVE IMMUNE SYSTEM |
| CALR     | 3  | 1504.66 | 0.070 | ADAPTIVE IMMUNE SYSTEM |
| ICAM1    | 1  | 1383.2  | 0.072 | ADAPTIVE IMMUNE SYSTEM |
| UBE2W    | 2  | 13253.9 | 0.079 | ADAPTIVE IMMUNE SYSTEM |
| KIR2DL1  | 16 | 36404.7 | 0.080 | ADAPTIVE IMMUNE SYSTEM |
| TIRAP    | 2  | 1954.4  | 0.085 | ADAPTIVE IMMUNE SYSTEM |
| PSMC2    | 2  | 17171.8 | 0.085 | ADAPTIVE IMMUNE SYSTEM |
| KBTBD13  | 1  | 473.625 | 0.086 | ADAPTIVE IMMUNE SYSTEM |
| HERC6    | 4  | 9940.29 | 0.086 | ADAPTIVE IMMUNE SYSTEM |
| YWHAB    | 1  | 2143.69 | 0.087 | ADAPTIVE IMMUNE SYSTEM |
| NFKB1    | 2  | 3793.03 | 0.088 | ADAPTIVE IMMUNE SYSTEM |
| LAT      | 2  | 4609.45 | 0.088 | ADAPTIVE IMMUNE SYSTEM |
| FBXO10   | 2  | 12030.5 | 0.091 | ADAPTIVE IMMUNE SYSTEM |
| LY96     | 1  | 318.213 | 0.096 | ADAPTIVE IMMUNE SYSTEM |
| PSMD5    | 3  | 4639.89 | 0.099 | ADAPTIVE IMMUNE SYSTEM |
| UBE2C    | 1  | 627.269 | 0.102 | ADAPTIVE IMMUNE SYSTEM |
| HLA-DRB1 | 15 | 51575.9 | 0.103 | ADAPTIVE IMMUNE SYSTEM |
| FBXO11   | 5  | 7796.53 | 0.103 | ADAPTIVE IMMUNE SYSTEM |
| UBE2D3   | 4  | 2979.44 | 0.104 | ADAPTIVE IMMUNE SYSTEM |
| VCAM1    | 2  | 14695.6 | 0.104 | ADAPTIVE IMMUNE SYSTEM |
| RNF25    | 4  | 2827.98 | 0.109 | ADAPTIVE IMMUNE SYSTEM |
| UBE2Q2   | 2  | 10988.4 | 0.113 | ADAPTIVE IMMUNE SYSTEM |
| NCF4     | 4  | 14976.1 | 0.116 | ADAPTIVE IMMUNE SYSTEM |
| PRKACG   | 1  | 608.885 | 0.116 | ADAPTIVE IMMUNE SYSTEM |
| BTN1A1   | 1  | 460.012 | 0.116 | ADAPTIVE IMMUNE SYSTEM |
| KLRG1    | 1  | 1002.56 | 0.119 | ADAPTIVE IMMUNE SYSTEM |
| TUBA8    | 1  | 8840.23 | 0.121 | ADAPTIVE IMMUNE SYSTEM |
| LCK      | 2  | 6622.49 | 0.122 | ADAPTIVE IMMUNE SYSTEM |
| UBE2B    | 1  | 861.479 | 0.126 | ADAPTIVE IMMUNE SYSTEM |
| GLMN     | 4  | 9496.62 | 0.127 | ADAPTIVE IMMUNE SYSTEM |
| KIF3C    | 2  | 1216.39 | 0.128 | ADAPTIVE IMMUNE SYSTEM |
| TLR4     | 1  | 1168.91 | 0.129 | ADAPTIVE IMMUNE SYSTEM |
| HLA-DQB2 | 6  | 7984.49 | 0.131 | ADAPTIVE IMMUNE SYSTEM |
| CDC26    | 1  | 2078.7  | 0.132 | ADAPTIVE IMMUNE SYSTEM |
| HACE1    | 1  | 395.445 | 0.132 | ADAPTIVE IMMUNE SYSTEM |
| KLRC1    | 1  | 3136.67 | 0.133 | ADAPTIVE IMMUNE SYSTEM |
| MLST8    | 1  | 297.162 | 0.134 | ADAPTIVE IMMUNE SYSTEM |
| SEM1     | 1  | 344.268 | 0.138 | ADAPTIVE IMMUNE SYSTEM |
| MKRN1    | 2  | 6173.38 | 0.139 | ADAPTIVE IMMUNE SYSTEM |
| KIF23    | 4  | 3631.87 | 0.140 | ADAPTIVE IMMUNE SYSTEM |
| HLA-B    | 1  | 665.838 | 0.142 | ADAPTIVE IMMUNE SYSTEM |
| PSMA5    | 1  | 2697.22 | 0.143 | ADAPTIVE IMMUNE SYSTEM |
| SEC61A2  | 1  | 2496.09 | 0.146 | ADAPTIVE IMMUNE SYSTEM |
| PSMB10   | 1  | 762.085 | 0.157 | ADAPTIVE IMMUNE SYSTEM |
| MAP3K14  | 2  | 2230.89 | 0.158 | ADAPTIVE IMMUNE SYSTEM |
| PTEN     | 1  | 365.055 | 0.159 | ADAPTIVE IMMUNE SYSTEM |
| VAV1     | 3  | 3589.44 | 0.161 | ADAPTIVE IMMUNE SYSTEM |
| AKT1     | 1  | 1750.51 | 0.163 | ADAPTIVE IMMUNE SYSTEM |
| DYNC1H1  | 8  | 6937.38 | 0.166 | ADAPTIVE IMMUNE SYSTEM |
| DNM3     | 5  | 17841.2 | 0.166 | ADAPTIVE IMMUNE SYSTEM |
| KLHL3    | 1  | 520.044 | 0.167 | ADAPTIVE IMMUNE SYSTEM |
| ORAI1    | 6  | 36859.9 | 0.167 | ADAPTIVE IMMUNE SYSTEM |
| PSMC3    | 1  | 2022.38 | 0.169 | ADAPTIVE IMMUNE SYSTEM |
| HLA-DOB  | 1  | 580.545 | 0.173 | ADAPTIVE IMMUNE SYSTEM |
| CD300C   | 1  | 665.811 | 0.178 | ADAPTIVE IMMUNE SYSTEM |
| ASB15    | 7  | 21416.8 | 0.180 | ADAPTIVE IMMUNE SYSTEM |
| FBXO4    | 2  | 1224.9  | 0.181 | ADAPTIVE IMMUNE SYSTEM |
| AKT2     | 5  | 5960.06 | 0.181 | ADAPTIVE IMMUNE SYSTEM |
| SIGLEC12 | 1  | 702.08  | 0.183 | ADAPTIVE IMMUNE SYSTEM |
| MGRN1    | 7  | 18471.9 | 0.184 | ADAPTIVE IMMUNE SYSTEM |
| EVL      | 1  | 199.743 | 0.187 | ADAPTIVE IMMUNE SYSTEM |
| LILRB5   | 4  | 14237.7 | 0.190 | ADAPTIVE IMMUNE SYSTEM |
| MAP3K8   | 1  | 323.456 | 0.198 | ADAPTIVE IMMUNE SYSTEM |
| VHL      | 2  | 1878.41 | 0.200 | ADAPTIVE IMMUNE SYSTEM |

|          |    |         |       |                        |
|----------|----|---------|-------|------------------------|
| MRC1     | 2  | 4975.08 | 0.201 | ADAPTIVE IMMUNE SYSTEM |
| FBXW11   | 2  | 5669.36 | 0.202 | ADAPTIVE IMMUNE SYSTEM |
| SEC13    | 2  | 2503.14 | 0.202 | ADAPTIVE IMMUNE SYSTEM |
| PTPN22   | 3  | 5735.5  | 0.202 | ADAPTIVE IMMUNE SYSTEM |
| PIK3R2   | 3  | 1064.11 | 0.209 | ADAPTIVE IMMUNE SYSTEM |
| BTN3A3   | 5  | 14644.8 | 0.211 | ADAPTIVE IMMUNE SYSTEM |
| ZAP70    | 3  | 3537.18 | 0.212 | ADAPTIVE IMMUNE SYSTEM |
| PPP2R5A  | 2  | 5291.16 | 0.214 | ADAPTIVE IMMUNE SYSTEM |
| HERC5    | 5  | 13472   | 0.215 | ADAPTIVE IMMUNE SYSTEM |
| LILRB2   | 12 | 16496.5 | 0.216 | ADAPTIVE IMMUNE SYSTEM |
| IFI30    | 1  | 407.801 | 0.217 | ADAPTIVE IMMUNE SYSTEM |
| CD74     | 2  | 2864.99 | 0.221 | ADAPTIVE IMMUNE SYSTEM |
| CDC23    | 4  | 8438.17 | 0.223 | ADAPTIVE IMMUNE SYSTEM |
| ASB18    | 1  | 288.439 | 0.223 | ADAPTIVE IMMUNE SYSTEM |
| DYNC1I1  | 3  | 2752.7  | 0.224 | ADAPTIVE IMMUNE SYSTEM |
| NPEPPS   | 2  | 9045.28 | 0.226 | ADAPTIVE IMMUNE SYSTEM |
| RNF14    | 1  | 393.384 | 0.226 | ADAPTIVE IMMUNE SYSTEM |
| UBA7     | 3  | 1898.47 | 0.227 | ADAPTIVE IMMUNE SYSTEM |
| HECW2    | 7  | 5298.35 | 0.228 | ADAPTIVE IMMUNE SYSTEM |
| DYNC1LI1 | 2  | 824.49  | 0.228 | ADAPTIVE IMMUNE SYSTEM |
| HLA-A    | 8  | 10184.8 | 0.232 | ADAPTIVE IMMUNE SYSTEM |
| UBE2J1   | 1  | 1008.81 | 0.232 | ADAPTIVE IMMUNE SYSTEM |
| ITPR2    | 8  | 15127.6 | 0.233 | ADAPTIVE IMMUNE SYSTEM |
| LILRA2   | 18 | 19164.6 | 0.236 | ADAPTIVE IMMUNE SYSTEM |
| RNF213   | 16 | 16560.2 | 0.236 | ADAPTIVE IMMUNE SYSTEM |
| KLRK1    | 2  | 1692.73 | 0.237 | ADAPTIVE IMMUNE SYSTEM |
| UBA6     | 2  | 631.763 | 0.238 | ADAPTIVE IMMUNE SYSTEM |
| CLTC     | 5  | 18429.1 | 0.239 | ADAPTIVE IMMUNE SYSTEM |
| BTNL8    | 1  | 316.022 | 0.239 | ADAPTIVE IMMUNE SYSTEM |
| ENAH     | 3  | 8599.74 | 0.240 | ADAPTIVE IMMUNE SYSTEM |
| TREML2   | 1  | 281.059 | 0.247 | ADAPTIVE IMMUNE SYSTEM |
| TREML4   | 1  | 593.905 | 0.248 | ADAPTIVE IMMUNE SYSTEM |
| FCGR3A   | 9  | 22926   | 0.250 | ADAPTIVE IMMUNE SYSTEM |
| KIF2C    | 1  | 262.925 | 0.251 | ADAPTIVE IMMUNE SYSTEM |
| RILP     | 3  | 1930.36 | 0.253 | ADAPTIVE IMMUNE SYSTEM |
| RNF41    | 1  | 493.016 | 0.254 | ADAPTIVE IMMUNE SYSTEM |
| KLHL21   | 1  | 175.92  | 0.256 | ADAPTIVE IMMUNE SYSTEM |
| CD36     | 10 | 17247.1 | 0.259 | ADAPTIVE IMMUNE SYSTEM |
| LILRA4   | 4  | 10247.6 | 0.259 | ADAPTIVE IMMUNE SYSTEM |
| SYK      | 1  | 726.573 | 0.266 | ADAPTIVE IMMUNE SYSTEM |
| FBXW4    | 1  | 296.089 | 0.266 | ADAPTIVE IMMUNE SYSTEM |
| PRR5     | 3  | 2097.9  | 0.267 | ADAPTIVE IMMUNE SYSTEM |
| SLAMF6   | 1  | 4388.54 | 0.268 | ADAPTIVE IMMUNE SYSTEM |
| PPP2R1B  | 3  | 7370.56 | 0.268 | ADAPTIVE IMMUNE SYSTEM |
| VASP     | 3  | 1729.17 | 0.269 | ADAPTIVE IMMUNE SYSTEM |
| PIK3CD   | 3  | 6426.86 | 0.270 | ADAPTIVE IMMUNE SYSTEM |
| UBA3     | 2  | 1330.05 | 0.272 | ADAPTIVE IMMUNE SYSTEM |
| CTSF     | 2  | 1025.46 | 0.273 | ADAPTIVE IMMUNE SYSTEM |
| FBXO31   | 3  | 1795.23 | 0.278 | ADAPTIVE IMMUNE SYSTEM |
| NCF1     | 2  | 1307.88 | 0.278 | ADAPTIVE IMMUNE SYSTEM |
| RNF114   | 1  | 591.841 | 0.279 | ADAPTIVE IMMUNE SYSTEM |
| BTNL2    | 5  | 15371.4 | 0.279 | ADAPTIVE IMMUNE SYSTEM |
| TNFRSF14 | 2  | 522.842 | 0.281 | ADAPTIVE IMMUNE SYSTEM |
| UBE4A    | 2  | 813.169 | 0.282 | ADAPTIVE IMMUNE SYSTEM |
| NEDD4L   | 8  | 11382.2 | 0.283 | ADAPTIVE IMMUNE SYSTEM |
| HLA-DPA1 | 1  | 1115.05 | 0.287 | ADAPTIVE IMMUNE SYSTEM |
| SEC31A   | 3  | 3258.58 | 0.288 | ADAPTIVE IMMUNE SYSTEM |
| PRKCQ    | 4  | 8536.51 | 0.293 | ADAPTIVE IMMUNE SYSTEM |
| AKT3     | 1  | 343.971 | 0.293 | ADAPTIVE IMMUNE SYSTEM |
| COL17A1  | 8  | 14222.4 | 0.293 | ADAPTIVE IMMUNE SYSTEM |
| CD300E   | 1  | 573.672 | 0.296 | ADAPTIVE IMMUNE SYSTEM |
| TPP2     | 3  | 1495.69 | 0.299 | ADAPTIVE IMMUNE SYSTEM |
| INPP5D   | 3  | 1437.75 | 0.300 | ADAPTIVE IMMUNE SYSTEM |
| KLHL20   | 2  | 2770.28 | 0.302 | ADAPTIVE IMMUNE SYSTEM |
| HLA-F    | 1  | 309.909 | 0.302 | ADAPTIVE IMMUNE SYSTEM |
| RAPGEF4  | 4  | 1444.81 | 0.303 | ADAPTIVE IMMUNE SYSTEM |
| CAPZA1   | 3  | 9675.02 | 0.306 | ADAPTIVE IMMUNE SYSTEM |
| COL1A2   | 6  | 8984.13 | 0.307 | ADAPTIVE IMMUNE SYSTEM |
| PSMD6    | 2  | 870.354 | 0.307 | ADAPTIVE IMMUNE SYSTEM |
| CD19     | 2  | 2253.31 | 0.309 | ADAPTIVE IMMUNE SYSTEM |
| UBE2O    | 5  | 2258.89 | 0.313 | ADAPTIVE IMMUNE SYSTEM |
| AP2B1    | 6  | 17982.5 | 0.316 | ADAPTIVE IMMUNE SYSTEM |
| DYNC1LI2 | 2  | 1120.25 | 0.319 | ADAPTIVE IMMUNE SYSTEM |
| KIF3B    | 1  | 155.997 | 0.322 | ADAPTIVE IMMUNE SYSTEM |

|          |    |         |       |                        |
|----------|----|---------|-------|------------------------|
| SEC24D   | 1  | 2512.26 | 0.323 | ADAPTIVE IMMUNE SYSTEM |
| ELOB     | 2  | 951.009 | 0.329 | ADAPTIVE IMMUNE SYSTEM |
| NFKBIE   | 1  | 353.203 | 0.329 | ADAPTIVE IMMUNE SYSTEM |
| KIF3A    | 1  | 707.204 | 0.330 | ADAPTIVE IMMUNE SYSTEM |
| RASGRP3  | 2  | 2158.27 | 0.331 | ADAPTIVE IMMUNE SYSTEM |
| CD300LF  | 1  | 591.933 | 0.332 | ADAPTIVE IMMUNE SYSTEM |
| PSMD8    | 1  | 169.844 | 0.334 | ADAPTIVE IMMUNE SYSTEM |
| TUBA3E   | 1  | 188.084 | 0.335 | ADAPTIVE IMMUNE SYSTEM |
| BTN3A2   | 2  | 793.24  | 0.335 | ADAPTIVE IMMUNE SYSTEM |
| KRAS     | 1  | 2146.89 | 0.338 | ADAPTIVE IMMUNE SYSTEM |
| DNM1     | 5  | 3402.03 | 0.344 | ADAPTIVE IMMUNE SYSTEM |
| PRKG1    | 1  | 190.014 | 0.348 | ADAPTIVE IMMUNE SYSTEM |
| HRAS     | 1  | 169.558 | 0.353 | ADAPTIVE IMMUNE SYSTEM |
| AP2A1    | 8  | 7691.74 | 0.357 | ADAPTIVE IMMUNE SYSTEM |
| LAG3     | 4  | 4930.02 | 0.357 | ADAPTIVE IMMUNE SYSTEM |
| CD8A     | 4  | 6102.45 | 0.357 | ADAPTIVE IMMUNE SYSTEM |
| PSMD1    | 6  | 6058.95 | 0.361 | ADAPTIVE IMMUNE SYSTEM |
| TLR2     | 1  | 384.039 | 0.367 | ADAPTIVE IMMUNE SYSTEM |
| HLA-DQA2 | 6  | 19186.6 | 0.375 | ADAPTIVE IMMUNE SYSTEM |
| HERC4    | 2  | 465.964 | 0.375 | ADAPTIVE IMMUNE SYSTEM |
| FBXO2    | 2  | 2609.67 | 0.378 | ADAPTIVE IMMUNE SYSTEM |
| CUL1     | 5  | 3951.13 | 0.381 | ADAPTIVE IMMUNE SYSTEM |
| UBB      | 4  | 3950.69 | 0.383 | ADAPTIVE IMMUNE SYSTEM |
| LILRB1   | 13 | 12247.9 | 0.383 | ADAPTIVE IMMUNE SYSTEM |
| PILRA    | 2  | 1101.37 | 0.384 | ADAPTIVE IMMUNE SYSTEM |
| UBE3A    | 9  | 94215.4 | 0.386 | ADAPTIVE IMMUNE SYSTEM |
| AP1B1    | 5  | 1827.33 | 0.386 | ADAPTIVE IMMUNE SYSTEM |
| PPP3CB   | 1  | 2800.61 | 0.387 | ADAPTIVE IMMUNE SYSTEM |
| SIPA1    | 4  | 7860.68 | 0.388 | ADAPTIVE IMMUNE SYSTEM |
| TUBB8    | 1  | 847.717 | 0.390 | ADAPTIVE IMMUNE SYSTEM |
| KLC1     | 4  | 4732.77 | 0.391 | ADAPTIVE IMMUNE SYSTEM |
| CD1D     | 1  | 193.878 | 0.395 | ADAPTIVE IMMUNE SYSTEM |
| RIPK2    | 7  | 17650.9 | 0.396 | ADAPTIVE IMMUNE SYSTEM |
| ICAM4    | 2  | 3772.84 | 0.398 | ADAPTIVE IMMUNE SYSTEM |
| BTN3A1   | 1  | 723.088 | 0.400 | ADAPTIVE IMMUNE SYSTEM |
| SNAP23   | 1  | 401.739 | 0.402 | ADAPTIVE IMMUNE SYSTEM |
| STIM1    | 3  | 10449.8 | 0.404 | ADAPTIVE IMMUNE SYSTEM |
| PPP2R1A  | 2  | 1519.99 | 0.404 | ADAPTIVE IMMUNE SYSTEM |
| NECTIN2  | 2  | 3874.93 | 0.409 | ADAPTIVE IMMUNE SYSTEM |
| FBXW10   | 5  | 2904.39 | 0.412 | ADAPTIVE IMMUNE SYSTEM |
| FBXW8    | 7  | 11483   | 0.416 | ADAPTIVE IMMUNE SYSTEM |
| RNF220   | 2  | 2101.58 | 0.421 | ADAPTIVE IMMUNE SYSTEM |
| CDC42    | 1  | 813.477 | 0.422 | ADAPTIVE IMMUNE SYSTEM |
| PSMD2    | 2  | 471.053 | 0.422 | ADAPTIVE IMMUNE SYSTEM |
| UBE2U    | 3  | 5599.87 | 0.425 | ADAPTIVE IMMUNE SYSTEM |
| PRKACA   | 1  | 490.158 | 0.427 | ADAPTIVE IMMUNE SYSTEM |
| SEC61A1  | 2  | 3154.03 | 0.429 | ADAPTIVE IMMUNE SYSTEM |
| LMO7     | 6  | 4334.12 | 0.431 | ADAPTIVE IMMUNE SYSTEM |
| PSMB8    | 1  | 72.0835 | 0.435 | ADAPTIVE IMMUNE SYSTEM |
| HLA-DRB5 | 8  | 10538.1 | 0.437 | ADAPTIVE IMMUNE SYSTEM |
| ASB13    | 2  | 696.714 | 0.439 | ADAPTIVE IMMUNE SYSTEM |
| MAP3K7   | 1  | 313.961 | 0.442 | ADAPTIVE IMMUNE SYSTEM |
| NRAS     | 1  | 122.852 | 0.443 | ADAPTIVE IMMUNE SYSTEM |
| ICAM5    | 2  | 630.971 | 0.447 | ADAPTIVE IMMUNE SYSTEM |
| CTSB     | 4  | 3057    | 0.447 | ADAPTIVE IMMUNE SYSTEM |
| PSMC6    | 1  | 279.949 | 0.449 | ADAPTIVE IMMUNE SYSTEM |
| AP1M1    | 3  | 938.774 | 0.449 | ADAPTIVE IMMUNE SYSTEM |
| WSB1     | 2  | 2496.25 | 0.449 | ADAPTIVE IMMUNE SYSTEM |
| TUBA1B   | 3  | 1949.44 | 0.451 | ADAPTIVE IMMUNE SYSTEM |
| COL3A1   | 4  | 5392.94 | 0.456 | ADAPTIVE IMMUNE SYSTEM |
| C3       | 2  | 683.331 | 0.460 | ADAPTIVE IMMUNE SYSTEM |
| JAML     | 1  | 234.486 | 0.460 | ADAPTIVE IMMUNE SYSTEM |
| UBE2S    | 1  | 86.0259 | 0.462 | ADAPTIVE IMMUNE SYSTEM |
| ULBP3    | 3  | 2769.71 | 0.463 | ADAPTIVE IMMUNE SYSTEM |
| FCGR1A   | 1  | 1366.08 | 0.463 | ADAPTIVE IMMUNE SYSTEM |
| ASB3     | 2  | 1407.83 | 0.465 | ADAPTIVE IMMUNE SYSTEM |
| PTPN6    | 5  | 3205.8  | 0.465 | ADAPTIVE IMMUNE SYSTEM |
| MALT1    | 3  | 2025.31 | 0.466 | ADAPTIVE IMMUNE SYSTEM |
| FBXO32   | 2  | 390.045 | 0.466 | ADAPTIVE IMMUNE SYSTEM |
| TRIM36   | 2  | 2816.36 | 0.469 | ADAPTIVE IMMUNE SYSTEM |
| HERC1    | 12 | 21032.6 | 0.469 | ADAPTIVE IMMUNE SYSTEM |
| ITGB2    | 6  | 8130.09 | 0.470 | ADAPTIVE IMMUNE SYSTEM |
| NCR3     | 2  | 428.445 | 0.472 | ADAPTIVE IMMUNE SYSTEM |
| SFTPD    | 2  | 1775.08 | 0.474 | ADAPTIVE IMMUNE SYSTEM |

|          |    |         |       |                        |
|----------|----|---------|-------|------------------------|
| KLRD1    | 2  | 2189.82 | 0.475 | ADAPTIVE IMMUNE SYSTEM |
| ARIH2    | 4  | 3181.46 | 0.475 | ADAPTIVE IMMUNE SYSTEM |
| TUBB4A   | 1  | 460.836 | 0.476 | ADAPTIVE IMMUNE SYSTEM |
| TRAF6    | 2  | 2718.63 | 0.478 | ADAPTIVE IMMUNE SYSTEM |
| KIF2A    | 1  | 196.963 | 0.479 | ADAPTIVE IMMUNE SYSTEM |
| PPP2R5E  | 3  | 1887.63 | 0.479 | ADAPTIVE IMMUNE SYSTEM |
| PTPN11   | 3  | 7344.79 | 0.484 | ADAPTIVE IMMUNE SYSTEM |
| ASB6     | 3  | 3012.4  | 0.485 | ADAPTIVE IMMUNE SYSTEM |
| FBXO7    | 3  | 2720.72 | 0.486 | ADAPTIVE IMMUNE SYSTEM |
| HLA-C    | 3  | 1558.62 | 0.486 | ADAPTIVE IMMUNE SYSTEM |
| PSMB2    | 1  | 941.808 | 0.487 | ADAPTIVE IMMUNE SYSTEM |
| NFKBIA   | 3  | 2901.92 | 0.489 | ADAPTIVE IMMUNE SYSTEM |
| CD33     | 2  | 3298.38 | 0.490 | ADAPTIVE IMMUNE SYSTEM |
| CD160    | 1  | 106.209 | 0.493 | ADAPTIVE IMMUNE SYSTEM |
| SEC24B   | 1  | 1018.83 | 0.500 | ADAPTIVE IMMUNE SYSTEM |
| FBXO6    | 1  | 146.736 | 0.501 | ADAPTIVE IMMUNE SYSTEM |
| FBXO17   | 2  | 297.499 | 0.501 | ADAPTIVE IMMUNE SYSTEM |
| KIFAP3   | 2  | 607.756 | 0.511 | ADAPTIVE IMMUNE SYSTEM |
| LGMN     | 3  | 749.241 | 0.513 | ADAPTIVE IMMUNE SYSTEM |
| NFATC1   | 1  | 175.101 | 0.516 | ADAPTIVE IMMUNE SYSTEM |
| FCGR2B   | 2  | 549.869 | 0.519 | ADAPTIVE IMMUNE SYSTEM |
| NCR3LG1  | 1  | 176.935 | 0.522 | ADAPTIVE IMMUNE SYSTEM |
| MYD88    | 2  | 281.088 | 0.523 | ADAPTIVE IMMUNE SYSTEM |
| LRSAM1   | 2  | 2262.36 | 0.525 | ADAPTIVE IMMUNE SYSTEM |
| CD207    | 2  | 253.491 | 0.526 | ADAPTIVE IMMUNE SYSTEM |
| DCAF1    | 2  | 759.106 | 0.529 | ADAPTIVE IMMUNE SYSTEM |
| SPSB1    | 1  | 372.81  | 0.530 | ADAPTIVE IMMUNE SYSTEM |
| SIGLEC1  | 11 | 15147.2 | 0.534 | ADAPTIVE IMMUNE SYSTEM |
| FBXL16   | 2  | 347.859 | 0.534 | ADAPTIVE IMMUNE SYSTEM |
| CBLB     | 1  | 74.7706 | 0.537 | ADAPTIVE IMMUNE SYSTEM |
| ANAPC4   | 2  | 1575.77 | 0.540 | ADAPTIVE IMMUNE SYSTEM |
| SIGLEC6  | 4  | 1074.49 | 0.542 | ADAPTIVE IMMUNE SYSTEM |
| DNM2     | 4  | 3870.44 | 0.548 | ADAPTIVE IMMUNE SYSTEM |
| SIGLEC7  | 2  | 1028.77 | 0.549 | ADAPTIVE IMMUNE SYSTEM |
| ANAPC2   | 3  | 336.362 | 0.551 | ADAPTIVE IMMUNE SYSTEM |
| AP1S3    | 2  | 333.621 | 0.551 | ADAPTIVE IMMUNE SYSTEM |
| PDCD1LG2 | 3  | 1614.08 | 0.552 | ADAPTIVE IMMUNE SYSTEM |
| SIGLEC10 | 9  | 5889.27 | 0.552 | ADAPTIVE IMMUNE SYSTEM |
| XDH      | 8  | 5421.65 | 0.554 | ADAPTIVE IMMUNE SYSTEM |
| TRIM63   | 4  | 1384.2  | 0.556 | ADAPTIVE IMMUNE SYSTEM |
| FBXL19   | 3  | 2082.44 | 0.559 | ADAPTIVE IMMUNE SYSTEM |
| UBR1     | 2  | 2229.15 | 0.561 | ADAPTIVE IMMUNE SYSTEM |
| ITPR1    | 11 | 11865.3 | 0.565 | ADAPTIVE IMMUNE SYSTEM |
| KIF5A    | 3  | 2830.34 | 0.566 | ADAPTIVE IMMUNE SYSTEM |
| CD247    | 1  | 667.704 | 0.568 | ADAPTIVE IMMUNE SYSTEM |
| SMURF2   | 4  | 1216.43 | 0.569 | ADAPTIVE IMMUNE SYSTEM |
| REL      | 2  | 1894.02 | 0.569 | ADAPTIVE IMMUNE SYSTEM |
| UBOX5    | 1  | 200.549 | 0.569 | ADAPTIVE IMMUNE SYSTEM |
| PSME4    | 9  | 5497.86 | 0.570 | ADAPTIVE IMMUNE SYSTEM |
| COL1A1   | 12 | 9288.38 | 0.570 | ADAPTIVE IMMUNE SYSTEM |
| PSMA3    | 2  | 320.475 | 0.571 | ADAPTIVE IMMUNE SYSTEM |
| PPP2R5C  | 8  | 4610.24 | 0.574 | ADAPTIVE IMMUNE SYSTEM |
| TUBA3C   | 1  | 144.803 | 0.574 | ADAPTIVE IMMUNE SYSTEM |
| FYB1     | 4  | 1845.95 | 0.576 | ADAPTIVE IMMUNE SYSTEM |
| ASB8     | 1  | 104.563 | 0.578 | ADAPTIVE IMMUNE SYSTEM |
| PSMD3    | 2  | 704.58  | 0.578 | ADAPTIVE IMMUNE SYSTEM |
| CLEC4G   | 3  | 1147.2  | 0.578 | ADAPTIVE IMMUNE SYSTEM |
| PSMB7    | 2  | 274.928 | 0.579 | ADAPTIVE IMMUNE SYSTEM |
| FBXL5    | 2  | 914.411 | 0.580 | ADAPTIVE IMMUNE SYSTEM |
| RNF6     | 1  | 142.618 | 0.582 | ADAPTIVE IMMUNE SYSTEM |
| FBXL12   | 3  | 2520.17 | 0.583 | ADAPTIVE IMMUNE SYSTEM |
| ITGB7    | 2  | 527.458 | 0.586 | ADAPTIVE IMMUNE SYSTEM |
| SIGLEC8  | 2  | 314.123 | 0.587 | ADAPTIVE IMMUNE SYSTEM |
| PSME3    | 1  | 155.122 | 0.591 | ADAPTIVE IMMUNE SYSTEM |
| FBXO9    | 2  | 2052.73 | 0.597 | ADAPTIVE IMMUNE SYSTEM |
| UBE2K    | 1  | 68.5941 | 0.599 | ADAPTIVE IMMUNE SYSTEM |
| ACTR1A   | 3  | 609.671 | 0.604 | ADAPTIVE IMMUNE SYSTEM |
| CD22     | 3  | 2879.37 | 0.605 | ADAPTIVE IMMUNE SYSTEM |
| CD3D     | 1  | 39.7199 | 0.610 | ADAPTIVE IMMUNE SYSTEM |
| FBXW7    | 1  | 29.7113 | 0.612 | ADAPTIVE IMMUNE SYSTEM |
| CTSE     | 2  | 293.238 | 0.613 | ADAPTIVE IMMUNE SYSTEM |
| MICB     | 4  | 2075.89 | 0.614 | ADAPTIVE IMMUNE SYSTEM |
| RAET1E   | 4  | 1842.42 | 0.614 | ADAPTIVE IMMUNE SYSTEM |
| PSMD13   | 2  | 170.236 | 0.614 | ADAPTIVE IMMUNE SYSTEM |

|         |    |         |       |                        |
|---------|----|---------|-------|------------------------|
| UBR2    | 5  | 1739.4  | 0.615 | ADAPTIVE IMMUNE SYSTEM |
| PLCG1   | 2  | 334.818 | 0.617 | ADAPTIVE IMMUNE SYSTEM |
| FZR1    | 2  | 761.638 | 0.617 | ADAPTIVE IMMUNE SYSTEM |
| LILRA5  | 1  | 30.3013 | 0.621 | ADAPTIVE IMMUNE SYSTEM |
| PPP2R5B | 2  | 307.618 | 0.622 | ADAPTIVE IMMUNE SYSTEM |
| HLA-DRA | 2  | 1470.33 | 0.625 | ADAPTIVE IMMUNE SYSTEM |
| CTSC    | 1  | 668.917 | 0.629 | ADAPTIVE IMMUNE SYSTEM |
| SIGLEC5 | 3  | 1433.86 | 0.632 | ADAPTIVE IMMUNE SYSTEM |
| TUBB3   | 1  | 81.5899 | 0.632 | ADAPTIVE IMMUNE SYSTEM |
| CD209   | 2  | 1436.44 | 0.633 | ADAPTIVE IMMUNE SYSTEM |
| BTN2A2  | 3  | 410.419 | 0.634 | ADAPTIVE IMMUNE SYSTEM |
| HLA-E   | 1  | 270.267 | 0.635 | ADAPTIVE IMMUNE SYSTEM |
| CUL7    | 1  | 839.348 | 0.635 | ADAPTIVE IMMUNE SYSTEM |
| PIK3CB  | 4  | 1998.2  | 0.640 | ADAPTIVE IMMUNE SYSTEM |
| PSMD12  | 2  | 485.828 | 0.641 | ADAPTIVE IMMUNE SYSTEM |
| KIR2DL4 | 7  | 4118.04 | 0.642 | ADAPTIVE IMMUNE SYSTEM |
| ICAM3   | 2  | 752.316 | 0.642 | ADAPTIVE IMMUNE SYSTEM |
| SH3RF1  | 3  | 1467.68 | 0.645 | ADAPTIVE IMMUNE SYSTEM |
| PIK3R3  | 2  | 941.166 | 0.647 | ADAPTIVE IMMUNE SYSTEM |
| SPTBN2  | 9  | 7168.18 | 0.647 | ADAPTIVE IMMUNE SYSTEM |
| KIF5B   | 3  | 695.657 | 0.649 | ADAPTIVE IMMUNE SYSTEM |
| KIF15   | 3  | 975.021 | 0.650 | ADAPTIVE IMMUNE SYSTEM |
| NCK1    | 1  | 473.579 | 0.650 | ADAPTIVE IMMUNE SYSTEM |
| COL2A1  | 6  | 4325.4  | 0.650 | ADAPTIVE IMMUNE SYSTEM |
| HSPA5   | 2  | 313.111 | 0.651 | ADAPTIVE IMMUNE SYSTEM |
| ERAP1   | 6  | 5856.87 | 0.657 | ADAPTIVE IMMUNE SYSTEM |
| CTSA    | 5  | 2126.3  | 0.658 | ADAPTIVE IMMUNE SYSTEM |
| CUL3    | 3  | 536.151 | 0.660 | ADAPTIVE IMMUNE SYSTEM |
| RNF123  | 7  | 2371.82 | 0.662 | ADAPTIVE IMMUNE SYSTEM |
| WWP1    | 4  | 1684.08 | 0.664 | ADAPTIVE IMMUNE SYSTEM |
| NFATC3  | 1  | 51.401  | 0.665 | ADAPTIVE IMMUNE SYSTEM |
| ITCH    | 4  | 1458.34 | 0.666 | ADAPTIVE IMMUNE SYSTEM |
| UBE2J2  | 2  | 1085.1  | 0.666 | ADAPTIVE IMMUNE SYSTEM |
| THOP1   | 14 | 17355.4 | 0.667 | ADAPTIVE IMMUNE SYSTEM |
| TRIM21  | 2  | 348.007 | 0.667 | ADAPTIVE IMMUNE SYSTEM |
| HERC3   | 6  | 1494.79 | 0.668 | ADAPTIVE IMMUNE SYSTEM |
| RNF217  | 3  | 2004.68 | 0.673 | ADAPTIVE IMMUNE SYSTEM |
| YES1    | 1  | 543.682 | 0.674 | ADAPTIVE IMMUNE SYSTEM |
| UBE2V2  | 2  | 372.489 | 0.678 | ADAPTIVE IMMUNE SYSTEM |
| CARD11  | 6  | 6999.49 | 0.679 | ADAPTIVE IMMUNE SYSTEM |
| CD96    | 1  | 206.011 | 0.680 | ADAPTIVE IMMUNE SYSTEM |
| RAP1GAP | 9  | 3855.18 | 0.686 | ADAPTIVE IMMUNE SYSTEM |
| UNKL    | 9  | 4215.78 | 0.687 | ADAPTIVE IMMUNE SYSTEM |
| CTSH    | 3  | 396.427 | 0.687 | ADAPTIVE IMMUNE SYSTEM |
| RNF182  | 2  | 749.402 | 0.689 | ADAPTIVE IMMUNE SYSTEM |
| DZIP3   | 3  | 858.59  | 0.690 | ADAPTIVE IMMUNE SYSTEM |
| FBXL8   | 1  | 24.8194 | 0.690 | ADAPTIVE IMMUNE SYSTEM |
| FBXO40  | 1  | 37.4501 | 0.691 | ADAPTIVE IMMUNE SYSTEM |
| ITGB5   | 4  | 4889.89 | 0.694 | ADAPTIVE IMMUNE SYSTEM |
| ZBTB16  | 1  | 24.7821 | 0.698 | ADAPTIVE IMMUNE SYSTEM |
| DCTN1   | 2  | 955.305 | 0.701 | ADAPTIVE IMMUNE SYSTEM |
| NPDC1   | 4  | 3066.64 | 0.702 | ADAPTIVE IMMUNE SYSTEM |
| KLC2    | 1  | 258.711 | 0.705 | ADAPTIVE IMMUNE SYSTEM |
| PPP2CB  | 1  | 67.6145 | 0.706 | ADAPTIVE IMMUNE SYSTEM |
| PIK3AP1 | 1  | 70.9865 | 0.707 | ADAPTIVE IMMUNE SYSTEM |
| HECTD3  | 2  | 1014.73 | 0.711 | ADAPTIVE IMMUNE SYSTEM |
| RICTOR  | 2  | 390.283 | 0.713 | ADAPTIVE IMMUNE SYSTEM |
| MADCAM1 | 12 | 10773.6 | 0.713 | ADAPTIVE IMMUNE SYSTEM |
| PSMD4   | 2  | 543.955 | 0.715 | ADAPTIVE IMMUNE SYSTEM |
| YWHAZ   | 1  | 92.0227 | 0.722 | ADAPTIVE IMMUNE SYSTEM |
| TRIM9   | 1  | 427.606 | 0.723 | ADAPTIVE IMMUNE SYSTEM |
| MIB2    | 6  | 1948.95 | 0.726 | ADAPTIVE IMMUNE SYSTEM |
| KLC3    | 4  | 805.974 | 0.726 | ADAPTIVE IMMUNE SYSTEM |
| ACTR1B  | 3  | 1431.5  | 0.727 | ADAPTIVE IMMUNE SYSTEM |
| PDCD1   | 2  | 640.72  | 0.732 | ADAPTIVE IMMUNE SYSTEM |
| PJA2    | 4  | 1750.35 | 0.733 | ADAPTIVE IMMUNE SYSTEM |
| AP2A2   | 10 | 2396.76 | 0.743 | ADAPTIVE IMMUNE SYSTEM |
| SELL    | 1  | 40.3109 | 0.743 | ADAPTIVE IMMUNE SYSTEM |
| KLHL25  | 2  | 436.639 | 0.743 | ADAPTIVE IMMUNE SYSTEM |
| RACGAP1 | 4  | 1302.33 | 0.744 | ADAPTIVE IMMUNE SYSTEM |
| TLR1    | 5  | 862.332 | 0.744 | ADAPTIVE IMMUNE SYSTEM |
| ITGB1   | 4  | 1853.42 | 0.744 | ADAPTIVE IMMUNE SYSTEM |
| CHUK    | 5  | 3253.31 | 0.747 | ADAPTIVE IMMUNE SYSTEM |
| AP1G1   | 5  | 881.608 | 0.748 | ADAPTIVE IMMUNE SYSTEM |

|         |    |         |       |                        |
|---------|----|---------|-------|------------------------|
| KLHL5   | 1  | 295.136 | 0.749 | ADAPTIVE IMMUNE SYSTEM |
| RNF130  | 1  | 7.11406 | 0.750 | ADAPTIVE IMMUNE SYSTEM |
| SAR1B   | 3  | 351.721 | 0.751 | ADAPTIVE IMMUNE SYSTEM |
| CD101   | 1  | 187.88  | 0.751 | ADAPTIVE IMMUNE SYSTEM |
| CSK     | 2  | 318.829 | 0.752 | ADAPTIVE IMMUNE SYSTEM |
| PSMC1   | 2  | 502.865 | 0.754 | ADAPTIVE IMMUNE SYSTEM |
| LCP2    | 3  | 890.138 | 0.754 | ADAPTIVE IMMUNE SYSTEM |
| FBXO15  | 3  | 548.728 | 0.761 | ADAPTIVE IMMUNE SYSTEM |
| NCR2    | 2  | 464.024 | 0.766 | ADAPTIVE IMMUNE SYSTEM |
| UBE3C   | 5  | 2845.14 | 0.766 | ADAPTIVE IMMUNE SYSTEM |
| RELA    | 2  | 1125.35 | 0.768 | ADAPTIVE IMMUNE SYSTEM |
| RPS27A  | 1  | 73.2875 | 0.770 | ADAPTIVE IMMUNE SYSTEM |
| KIF18A  | 1  | 80.9047 | 0.771 | ADAPTIVE IMMUNE SYSTEM |
| LILRA1  | 4  | 709.752 | 0.773 | ADAPTIVE IMMUNE SYSTEM |
| RNF111  | 8  | 2735.43 | 0.774 | ADAPTIVE IMMUNE SYSTEM |
| ITGAL   | 4  | 2599.38 | 0.777 | ADAPTIVE IMMUNE SYSTEM |
| CTSK    | 1  | 56.6202 | 0.777 | ADAPTIVE IMMUNE SYSTEM |
| TUBB1   | 1  | 14.6338 | 0.777 | ADAPTIVE IMMUNE SYSTEM |
| LRRC41  | 1  | 80.6609 | 0.786 | ADAPTIVE IMMUNE SYSTEM |
| TAPBP   | 2  | 508.714 | 0.790 | ADAPTIVE IMMUNE SYSTEM |
| OSBPL1A | 3  | 1240.88 | 0.791 | ADAPTIVE IMMUNE SYSTEM |
| CTSL    | 2  | 351.799 | 0.794 | ADAPTIVE IMMUNE SYSTEM |
| ASB16   | 1  | 252.209 | 0.795 | ADAPTIVE IMMUNE SYSTEM |
| AP2M1   | 3  | 795.672 | 0.800 | ADAPTIVE IMMUNE SYSTEM |
| BLNK    | 4  | 1348.57 | 0.804 | ADAPTIVE IMMUNE SYSTEM |
| TRIP12  | 8  | 3679.29 | 0.804 | ADAPTIVE IMMUNE SYSTEM |
| TAP2    | 8  | 5811.75 | 0.809 | ADAPTIVE IMMUNE SYSTEM |
| PSMA4   | 2  | 361.252 | 0.809 | ADAPTIVE IMMUNE SYSTEM |
| RBBP6   | 1  | 13.7942 | 0.812 | ADAPTIVE IMMUNE SYSTEM |
| BTNL9   | 4  | 761.977 | 0.813 | ADAPTIVE IMMUNE SYSTEM |
| AP1M2   | 3  | 501.252 | 0.816 | ADAPTIVE IMMUNE SYSTEM |
| SIGLEC9 | 3  | 599.003 | 0.817 | ADAPTIVE IMMUNE SYSTEM |
| NEDD4   | 8  | 1174.35 | 0.818 | ADAPTIVE IMMUNE SYSTEM |
| KIF20A  | 1  | 15.5086 | 0.819 | ADAPTIVE IMMUNE SYSTEM |
| SEC24C  | 4  | 2689.02 | 0.825 | ADAPTIVE IMMUNE SYSTEM |
| CD300A  | 3  | 245.205 | 0.828 | ADAPTIVE IMMUNE SYSTEM |
| ICAM2   | 1  | 8.4315  | 0.830 | ADAPTIVE IMMUNE SYSTEM |
| NCR1    | 3  | 192.569 | 0.830 | ADAPTIVE IMMUNE SYSTEM |
| KIR3DL2 | 3  | 221.42  | 0.832 | ADAPTIVE IMMUNE SYSTEM |
| CD1B    | 1  | 37.4283 | 0.833 | ADAPTIVE IMMUNE SYSTEM |
| PSMC5   | 2  | 227.826 | 0.834 | ADAPTIVE IMMUNE SYSTEM |
| PVR     | 1  | 160.926 | 0.834 | ADAPTIVE IMMUNE SYSTEM |
| IKBKB   | 3  | 132.16  | 0.836 | ADAPTIVE IMMUNE SYSTEM |
| ANAPC1  | 2  | 417.09  | 0.836 | ADAPTIVE IMMUNE SYSTEM |
| PAK2    | 1  | 6.97659 | 0.837 | ADAPTIVE IMMUNE SYSTEM |
| LILRA6  | 6  | 1159.03 | 0.837 | ADAPTIVE IMMUNE SYSTEM |
| KIR3DL1 | 7  | 2292.05 | 0.837 | ADAPTIVE IMMUNE SYSTEM |
| UBE2E2  | 4  | 651.073 | 0.838 | ADAPTIVE IMMUNE SYSTEM |
| RAP1B   | 3  | 398.375 | 0.843 | ADAPTIVE IMMUNE SYSTEM |
| CTSD    | 4  | 843.091 | 0.844 | ADAPTIVE IMMUNE SYSTEM |
| FBXL20  | 2  | 621.424 | 0.844 | ADAPTIVE IMMUNE SYSTEM |
| PSMD14  | 2  | 91.0049 | 0.845 | ADAPTIVE IMMUNE SYSTEM |
| BTN2A1  | 5  | 1308.67 | 0.849 | ADAPTIVE IMMUNE SYSTEM |
| NCF2    | 3  | 392.542 | 0.850 | ADAPTIVE IMMUNE SYSTEM |
| ELOC    | 1  | 36.5738 | 0.851 | ADAPTIVE IMMUNE SYSTEM |
| PSMA7   | 2  | 118.382 | 0.856 | ADAPTIVE IMMUNE SYSTEM |
| KLHL22  | 1  | 102.597 | 0.857 | ADAPTIVE IMMUNE SYSTEM |
| SOS1    | 4  | 654.542 | 0.859 | ADAPTIVE IMMUNE SYSTEM |
| LRR1    | 2  | 34.8516 | 0.859 | ADAPTIVE IMMUNE SYSTEM |
| CYBA    | 3  | 81.8242 | 0.860 | ADAPTIVE IMMUNE SYSTEM |
| FBXO41  | 2  | 34.4517 | 0.861 | ADAPTIVE IMMUNE SYSTEM |
| SRC     | 3  | 468.232 | 0.862 | ADAPTIVE IMMUNE SYSTEM |
| HCST    | 1  | 54.1105 | 0.864 | ADAPTIVE IMMUNE SYSTEM |
| UBE3D   | 2  | 65.3062 | 0.864 | ADAPTIVE IMMUNE SYSTEM |
| RNF144B | 1  | 26.5772 | 0.865 | ADAPTIVE IMMUNE SYSTEM |
| KLRB1   | 1  | 6.34327 | 0.869 | ADAPTIVE IMMUNE SYSTEM |
| LTN1    | 4  | 694.955 | 0.871 | ADAPTIVE IMMUNE SYSTEM |
| RNF126  | 13 | 2496.46 | 0.871 | ADAPTIVE IMMUNE SYSTEM |
| CD226   | 1  | 76.0673 | 0.871 | ADAPTIVE IMMUNE SYSTEM |
| TRIB3   | 1  | 11.5523 | 0.873 | ADAPTIVE IMMUNE SYSTEM |
| CANX    | 1  | 11.7519 | 0.876 | ADAPTIVE IMMUNE SYSTEM |
| PTPRJ   | 5  | 190.391 | 0.877 | ADAPTIVE IMMUNE SYSTEM |
| TRIM4   | 1  | 20.8361 | 0.878 | ADAPTIVE IMMUNE SYSTEM |
| LNX1    | 3  | 67.2203 | 0.878 | ADAPTIVE IMMUNE SYSTEM |

|         |    |           |       |                        |
|---------|----|-----------|-------|------------------------|
| UBE2V1  | 1  | 4.44387   | 0.882 | ADAPTIVE IMMUNE SYSTEM |
| KLHL2   | 1  | 3.99832   | 0.885 | ADAPTIVE IMMUNE SYSTEM |
| RAPGEF3 | 6  | 1944.74   | 0.887 | ADAPTIVE IMMUNE SYSTEM |
| ITPR3   | 20 | 3866.94   | 0.887 | ADAPTIVE IMMUNE SYSTEM |
| TUBB4B  | 1  | 5.99978   | 0.899 | ADAPTIVE IMMUNE SYSTEM |
| PLCG2   | 9  | 1388.68   | 0.905 | ADAPTIVE IMMUNE SYSTEM |
| PPL     | 7  | 292.206   | 0.910 | ADAPTIVE IMMUNE SYSTEM |
| TUBB6   | 1  | 2.31435   | 0.912 | ADAPTIVE IMMUNE SYSTEM |
| CD200R1 | 1  | 2.03298   | 0.916 | ADAPTIVE IMMUNE SYSTEM |
| ACTR10  | 1  | 5.51176   | 0.921 | ADAPTIVE IMMUNE SYSTEM |
| FBXW12  | 1  | 10.1706   | 0.928 | ADAPTIVE IMMUNE SYSTEM |
| TRIM69  | 1  | 4.11981   | 0.939 | ADAPTIVE IMMUNE SYSTEM |
| MAPKAP1 | 1  | 0.424263  | 0.952 | ADAPTIVE IMMUNE SYSTEM |
| CTSV    | 1  | 1.0437    | 0.961 | ADAPTIVE IMMUNE SYSTEM |
| CD3E    | 1  | 0.486528  | 0.963 | ADAPTIVE IMMUNE SYSTEM |
| KEAP1   | 1  | 0.768956  | 0.974 | ADAPTIVE IMMUNE SYSTEM |
| HECTD2  | 1  | 0.461612  | 0.981 | ADAPTIVE IMMUNE SYSTEM |
| CAPZB   | 1  | 0.914266  | 0.983 | ADAPTIVE IMMUNE SYSTEM |
| UBE2N   | 1  | 0.0113746 | 0.990 | ADAPTIVE IMMUNE SYSTEM |
| PSMB11  | 1  | 0.189101  | 0.992 | ADAPTIVE IMMUNE SYSTEM |
| LAIR2   | 1  | 0.0107827 | 0.996 | ADAPTIVE IMMUNE SYSTEM |
| TRPC1   | 4  | 1.54251   | 1     | ADAPTIVE IMMUNE SYSTEM |
| LAIR1   | 2  | 128.947   | 1     | ADAPTIVE IMMUNE SYSTEM |
| CCNF    | 3  | 0.139558  | 1     | ADAPTIVE IMMUNE SYSTEM |
| HERC2   | 26 | 14501.7   | 1     | ADAPTIVE IMMUNE SYSTEM |
| SKP1    | 2  | 769.732   | 1     | ADAPTIVE IMMUNE SYSTEM |
| CUL2    | 3  | 230.546   | 1     | ADAPTIVE IMMUNE SYSTEM |
| PIK3CA  | 6  | 151.583   | 1     | ADAPTIVE IMMUNE SYSTEM |
| CDC16   | 3  | 89.734    | 1     | ADAPTIVE IMMUNE SYSTEM |
| UBA52   | 2  | 4.03884   | 1     | ADAPTIVE IMMUNE SYSTEM |
| KIF11   | 5  | 49.4843   | 1     | ADAPTIVE IMMUNE SYSTEM |
| FBXL18  | 2  | 48.2339   | 1     | ADAPTIVE IMMUNE SYSTEM |
| RNF19A  | 2  | 54.8618   | 1     | ADAPTIVE IMMUNE SYSTEM |
| BLK     | 3  | 45.268    | 1     | ADAPTIVE IMMUNE SYSTEM |
| TRIM37  | 5  | 111.595   | 1     | ADAPTIVE IMMUNE SYSTEM |
| PTPRC   | 4  | 395.503   | 1     | ADAPTIVE IMMUNE SYSTEM |
| SPSB2   | 4  | 930.443   | 1     | ADAPTIVE IMMUNE SYSTEM |
| ANAPC5  | 3  | 186.101   | 1     | ADAPTIVE IMMUNE SYSTEM |
| TRAF7   | 9  | 508.43    | 1     | ADAPTIVE IMMUNE SYSTEM |
| ERAP2   | 3  | 45.3735   | 1     | ADAPTIVE IMMUNE SYSTEM |
| DCTN4   | 3  | 110.702   | 1     | ADAPTIVE IMMUNE SYSTEM |
| FBXO22  | 2  | 278.226   | 1     | ADAPTIVE IMMUNE SYSTEM |
| CDC27   | 4  | 362.076   | 1     | ADAPTIVE IMMUNE SYSTEM |
| SEC24A  | 6  | 294.403   | 1     | ADAPTIVE IMMUNE SYSTEM |
| UBR4    | 10 | 370.752   | 1     | ADAPTIVE IMMUNE SYSTEM |
| PPP3CA  | 3  | 12.3568   | 1     | ADAPTIVE IMMUNE SYSTEM |
| FBXL4   | 3  | 569.843   | 1     | ADAPTIVE IMMUNE SYSTEM |
| CD34    | 2  | 43.2682   | 1     | ADAPTIVE IMMUNE SYSTEM |
| FBXW2   | 2  | 0.55473   | 1     | ADAPTIVE IMMUNE SYSTEM |
| RAC1    | 2  | 325.8     | 1     | ADAPTIVE IMMUNE SYSTEM |
| LNPEP   | 3  | 2303.67   | 1     | ADAPTIVE IMMUNE SYSTEM |
| MTOR    | 9  | 726.593   | 1     | ADAPTIVE IMMUNE SYSTEM |
| CD8B    | 2  | 395.846   | 1     | ADAPTIVE IMMUNE SYSTEM |
| FBXW5   | 6  | 111.707   | 1     | ADAPTIVE IMMUNE SYSTEM |
| ASB14   | 2  | 45.3978   | 1     | ADAPTIVE IMMUNE SYSTEM |
| BTBD6   | 12 | 7871.17   | 1     | ADAPTIVE IMMUNE SYSTEM |
| CENPE   | 3  | 530.457   | 1     | ADAPTIVE IMMUNE SYSTEM |
| TRIM50  | 4  | 18.0716   | 1     | ADAPTIVE IMMUNE SYSTEM |
| PDIA3   | 2  | 18.977    | 1     | ADAPTIVE IMMUNE SYSTEM |
| ZNRF1   | 3  | 106.279   | 1     | ADAPTIVE IMMUNE SYSTEM |
| MRC2    | 4  | 91.2349   | 1     | ADAPTIVE IMMUNE SYSTEM |
| RAF1    | 2  | NA        | NA    | ADAPTIVE IMMUNE SYSTEM |
| ANAPC11 | 2  | NA        | NA    | ADAPTIVE IMMUNE SYSTEM |

| Gene  | NumVar | Q       | Pvalue | Gene-set                |
|-------|--------|---------|--------|-------------------------|
| PRKN  | 13     | 856826  | 0.008  | ALPHA SYNUCLEIN PATHWAY |
| FYN   | 6      | 20441   | 0.055  | ALPHA SYNUCLEIN PATHWAY |
| BAD   | 1      | 185.522 | 0.082  | ALPHA SYNUCLEIN PATHWAY |
| PLD1  | 3      | 11745.6 | 0.097  | ALPHA SYNUCLEIN PATHWAY |
| LCK   | 2      | 6622.49 | 0.122  | ALPHA SYNUCLEIN PATHWAY |
| PLD2  | 9      | 18632.6 | 0.165  | ALPHA SYNUCLEIN PATHWAY |
| UCHL1 | 1      | 1327.34 | 0.184  | ALPHA SYNUCLEIN PATHWAY |
| SYK   | 1      | 726.573 | 0.266  | ALPHA SYNUCLEIN PATHWAY |
| PARK7 | 3      | 1643.8  | 0.307  | ALPHA SYNUCLEIN PATHWAY |

|               |   |         |       |                         |
|---------------|---|---------|-------|-------------------------|
| <i>PLCB2</i>  | 6 | 10676.9 | 0.448 | ALPHA SYNUCLEIN PATHWAY |
| <i>PTK2B</i>  | 5 | 4269.52 | 0.476 | ALPHA SYNUCLEIN PATHWAY |
| <i>SNCA</i>   | 3 | 4903.09 | 0.486 | ALPHA SYNUCLEIN PATHWAY |
| <i>MAPK3</i>  | 1 | 54.5027 | 0.549 | ALPHA SYNUCLEIN PATHWAY |
| <i>FGR</i>    | 1 | 268.01  | 0.573 | ALPHA SYNUCLEIN PATHWAY |
| <i>YES1</i>   | 1 | 543.682 | 0.674 | ALPHA SYNUCLEIN PATHWAY |
| <i>PRKCD</i>  | 4 | 470.582 | 0.788 | ALPHA SYNUCLEIN PATHWAY |
| <i>SLC6A3</i> | 4 | 790.553 | 0.805 | ALPHA SYNUCLEIN PATHWAY |
| <i>GRK5</i>   | 1 | 18.7956 | 0.805 | ALPHA SYNUCLEIN PATHWAY |
| <i>TOR1A</i>  | 1 | 164.337 | 0.828 | ALPHA SYNUCLEIN PATHWAY |
| <i>TH</i>     | 5 | 3586.85 | 0.847 | ALPHA SYNUCLEIN PATHWAY |
| <i>SRC</i>    | 3 | 468.232 | 0.862 | ALPHA SYNUCLEIN PATHWAY |
| <i>HCK</i>    | 5 | 1661.83 | 0.875 | ALPHA SYNUCLEIN PATHWAY |
| <i>BLK</i>    | 3 | 45.268  | 1     | ALPHA SYNUCLEIN PATHWAY |

| Gene           | NumVar | Q        | Pvalue | Gene-set           |
|----------------|--------|----------|--------|--------------------|
| <i>PRKN</i>    | 13     | 856826   | 0.008  | PARKINSONS DISEASE |
| <i>NDUFA10</i> | 3      | 8280.31  | 0.031  | PARKINSONS DISEASE |
| <i>NDUFS8</i>  | 4      | 8311.64  | 0.053  | PARKINSONS DISEASE |
| <i>NDUFS2</i>  | 7      | 18048    | 0.054  | PARKINSONS DISEASE |
| <i>CASP9</i>   | 5      | 20632.8  | 0.069  | PARKINSONS DISEASE |
| <i>COX4I2</i>  | 3      | 38887.7  | 0.082  | PARKINSONS DISEASE |
| <i>NDUFS7</i>  | 10     | 54469.5  | 0.100  | PARKINSONS DISEASE |
| <i>COX5A</i>   | 1      | 1412.9   | 0.160  | PARKINSONS DISEASE |
| <i>NDUFV1</i>  | 2      | 2158.75  | 0.170  | PARKINSONS DISEASE |
| <i>UCHL1</i>   | 1      | 1327.34  | 0.184  | PARKINSONS DISEASE |
| <i>UQCRB</i>   | 1      | 325.945  | 0.199  | PARKINSONS DISEASE |
| <i>NDUFS6</i>  | 1      | 5106.93  | 0.227  | PARKINSONS DISEASE |
| <i>UBA7</i>    | 3      | 1898.47  | 0.227  | PARKINSONS DISEASE |
| <i>UBE2J1</i>  | 1      | 1008.81  | 0.232  | PARKINSONS DISEASE |
| <i>COX4I1</i>  | 1      | 330.989  | 0.252  | PARKINSONS DISEASE |
| <i>NDUFB10</i> | 1      | 4333.45  | 0.288  | PARKINSONS DISEASE |
| <i>SLC18A1</i> | 2      | 2088.33  | 0.290  | PARKINSONS DISEASE |
| <i>PARK7</i>   | 3      | 1643.8   | 0.307  | PARKINSONS DISEASE |
| <i>COX7A1</i>  | 6      | 10988.6  | 0.351  | PARKINSONS DISEASE |
| <i>NDUFB7</i>  | 1      | 243.419  | 0.362  | PARKINSONS DISEASE |
| <i>NDUFB3</i>  | 2      | 1371.69  | 0.368  | PARKINSONS DISEASE |
| <i>SDHA</i>    | 6      | 3838.7   | 0.380  | PARKINSONS DISEASE |
| <i>UBB</i>     | 4      | 3950.69  | 0.383  | PARKINSONS DISEASE |
| <i>APAF1</i>   | 4      | 5645.14  | 0.389  | PARKINSONS DISEASE |
| <i>NDUFB2</i>  | 2      | 321.324  | 0.402  | PARKINSONS DISEASE |
| <i>UQCRH</i>   | 1      | 130.97   | 0.407  | PARKINSONS DISEASE |
| <i>SDHB</i>    | 3      | 5386.95  | 0.435  | PARKINSONS DISEASE |
| <i>COX6B2</i>  | 5      | 5402.37  | 0.466  | PARKINSONS DISEASE |
| <i>PPID</i>    | 3      | 2148.08  | 0.480  | PARKINSONS DISEASE |
| <i>SNCA</i>    | 3      | 4903.09  | 0.486  | PARKINSONS DISEASE |
| <i>SLC18A2</i> | 2      | 724.162  | 0.492  | PARKINSONS DISEASE |
| <i>NDUFS5</i>  | 1      | 46.154   | 0.496  | PARKINSONS DISEASE |
| <i>UQCR10</i>  | 4      | 1349.63  | 0.538  | PARKINSONS DISEASE |
| <i>COX6A2</i>  | 4      | 655.78   | 0.595  | PARKINSONS DISEASE |
| <i>NDUFA3</i>  | 2      | 1707.39  | 0.601  | PARKINSONS DISEASE |
| <i>NDUFC1</i>  | 1      | 54.7771  | 0.610  | PARKINSONS DISEASE |
| <i>CYC1</i>    | 3      | 2395.6   | 0.628  | PARKINSONS DISEASE |
| <i>NDUFAB1</i> | 1      | 47.299   | 0.631  | PARKINSONS DISEASE |
| <i>COX5B</i>   | 1      | 179.531  | 0.656  | PARKINSONS DISEASE |
| <i>UBE2J2</i>  | 2      | 1085.1   | 0.666  | PARKINSONS DISEASE |
| <i>NDUFV3</i>  | 4      | 1441.93  | 0.693  | PARKINSONS DISEASE |
| <i>NDUFA5</i>  | 4      | 4121.43  | 0.715  | PARKINSONS DISEASE |
| <i>NDUFA8</i>  | 1      | 14.1714  | 0.750  | PARKINSONS DISEASE |
| <i>COX7A2</i>  | 3      | 839.18   | 0.766  | PARKINSONS DISEASE |
| <i>NDUFV2</i>  | 1      | 17.9868  | 0.771  | PARKINSONS DISEASE |
| <i>NDUFS4</i>  | 1      | 123.047  | 0.802  | PARKINSONS DISEASE |
| <i>SLC6A3</i>  | 4      | 790.553  | 0.805  | PARKINSONS DISEASE |
| <i>UQCR11</i>  | 1      | 131.742  | 0.828  | PARKINSONS DISEASE |
| <i>NDUFA4</i>  | 1      | 12.5069  | 0.829  | PARKINSONS DISEASE |
| <i>TH</i>      | 5      | 3586.85  | 0.847  | PARKINSONS DISEASE |
| <i>NDUFA6</i>  | 1      | 0.639585 | 0.960  | PARKINSONS DISEASE |
| <i>NDUFC2</i>  | 1      | 0.83966  | 0.984  | PARKINSONS DISEASE |
| <i>NDUFS1</i>  | 7      | 964.171  | 1      | PARKINSONS DISEASE |
| <i>LRRK2</i>   | 6      | 171.441  | 1      | PARKINSONS DISEASE |

c) CADD score > 12

| Gene | NumVar | Q | Pvalue | Gene-set |
|------|--------|---|--------|----------|
|------|--------|---|--------|----------|

|               |   |         |       |                      |
|---------------|---|---------|-------|----------------------|
| MAPK3         | 1 | 15775.9 | 0.005 | LONG TERM DEPRESSION |
| CACNA1A       | 1 | 20671.1 | 0.013 | LONG TERM DEPRESSION |
| PLA2G4E       | 1 | 1010.48 | 0.027 | LONG TERM DEPRESSION |
| PLA2G2E       | 1 | 422.514 | 0.140 | LONG TERM DEPRESSION |
| PPP2R1A       | 1 | 1061.75 | 0.259 | LONG TERM DEPRESSION |
| PPP2R1B       | 1 | 71.1039 | 0.529 | LONG TERM DEPRESSION |
| JMJD7-PLA2G4B | 1 | 42.8439 | 0.662 | LONG TERM DEPRESSION |
| PLA2G4B       | 1 | 42.8439 | 0.662 | LONG TERM DEPRESSION |
| PLA2G3        | 1 | 75.937  | 0.741 | LONG TERM DEPRESSION |

| Gene  | NumVar | Q       | Pvalue | Gene-set                                  |
|-------|--------|---------|--------|-------------------------------------------|
| VAMP5 | 1      | 2100.02 | 0.077  | SNARE INTERACTIONS IN VESICULAR TRANSPORT |
| GOSR2 | 1      | 206.968 | 0.388  | SNARE INTERACTIONS IN VESICULAR TRANSPORT |

| Gene  | NumVar | Q       | Pvalue | Gene-set                |
|-------|--------|---------|--------|-------------------------|
| MAPK3 | 1      | 15775.9 | 0.005  | ALPHA SYNUCLEIN PATHWAY |
| PLD2  | 1      | 572.968 | 0.280  | ALPHA SYNUCLEIN PATHWAY |
| PTK2B | 1      | 163.702 | 0.387  | ALPHA SYNUCLEIN PATHWAY |

| Gene    | NumVar | Q       | Pvalue | Gene-set                                                    |
|---------|--------|---------|--------|-------------------------------------------------------------|
| MAPK3   | 1      | 15775.9 | 0.005  | DTRANSMITTER RECEPTORS AND POSTSYNAPTIC SIGNAL TRANSMISSION |
| GRIK2   | 1      | 12645   | 0.055  | DTRANSMITTER RECEPTORS AND POSTSYNAPTIC SIGNAL TRANSMISSION |
| EPB41L1 | 2      | 5224.43 | 0.072  | DTRANSMITTER RECEPTORS AND POSTSYNAPTIC SIGNAL TRANSMISSION |
| GABRA5  | 1      | 3053.72 | 0.080  | DTRANSMITTER RECEPTORS AND POSTSYNAPTIC SIGNAL TRANSMISSION |
| CHRNE   | 1      | 1105.55 | 0.280  | DTRANSMITTER RECEPTORS AND POSTSYNAPTIC SIGNAL TRANSMISSION |
| TUBA3E  | 1      | 188.084 | 0.335  | DTRANSMITTER RECEPTORS AND POSTSYNAPTIC SIGNAL TRANSMISSION |
| CHRNA9  | 1      | 139.31  | 0.378  | DTRANSMITTER RECEPTORS AND POSTSYNAPTIC SIGNAL TRANSMISSION |
| CACNG4  | 1      | 86.5487 | 0.526  | DTRANSMITTER RECEPTORS AND POSTSYNAPTIC SIGNAL TRANSMISSION |
| CAMK2B  | 2      | 581.525 | 0.643  | DTRANSMITTER RECEPTORS AND POSTSYNAPTIC SIGNAL TRANSMISSION |
| KCNJ16  | 1      | 24.8988 | 0.756  | DTRANSMITTER RECEPTORS AND POSTSYNAPTIC SIGNAL TRANSMISSION |
| GNAT3   | 2      | 128.133 | 0.774  | DTRANSMITTER RECEPTORS AND POSTSYNAPTIC SIGNAL TRANSMISSION |
| TUBB1   | 1      | 14.6338 | 0.777  | DTRANSMITTER RECEPTORS AND POSTSYNAPTIC SIGNAL TRANSMISSION |

| Gene     | NumVar | Q       | Pvalue | Gene-set                              |
|----------|--------|---------|--------|---------------------------------------|
| MAPK3    | 1      | 15775.9 | 0.005  | TRANSMISSION ACROSS CHEMICAL SYNAPSES |
| CACNA1A  | 1      | 20671.1 | 0.013  | TRANSMISSION ACROSS CHEMICAL SYNAPSES |
| LRTOMT   | 1      | 10049.2 | 0.051  | TRANSMISSION ACROSS CHEMICAL SYNAPSES |
| GRIK2    | 1      | 12645   | 0.055  | TRANSMISSION ACROSS CHEMICAL SYNAPSES |
| EPB41L1  | 2      | 5224.43 | 0.072  | TRANSMISSION ACROSS CHEMICAL SYNAPSES |
| GABRA5   | 1      | 3053.72 | 0.080  | TRANSMISSION ACROSS CHEMICAL SYNAPSES |
| SLC22A1  | 1      | 569.652 | 0.275  | TRANSMISSION ACROSS CHEMICAL SYNAPSES |
| CHRNE    | 1      | 1105.55 | 0.280  | TRANSMISSION ACROSS CHEMICAL SYNAPSES |
| TUBA3E   | 1      | 188.084 | 0.335  | TRANSMISSION ACROSS CHEMICAL SYNAPSES |
| CHRNA9   | 1      | 139.31  | 0.378  | TRANSMISSION ACROSS CHEMICAL SYNAPSES |
| CACNG4   | 1      | 86.5487 | 0.526  | TRANSMISSION ACROSS CHEMICAL SYNAPSES |
| CACNA2D3 | 1      | 104.697 | 0.609  | TRANSMISSION ACROSS CHEMICAL SYNAPSES |
| CAMK2B   | 2      | 581.525 | 0.643  | TRANSMISSION ACROSS CHEMICAL SYNAPSES |
| TSPOAP1  | 1      | 61.194  | 0.667  | TRANSMISSION ACROSS CHEMICAL SYNAPSES |
| KCNJ16   | 1      | 24.8988 | 0.756  | TRANSMISSION ACROSS CHEMICAL SYNAPSES |
| GNAT3    | 2      | 128.133 | 0.774  | TRANSMISSION ACROSS CHEMICAL SYNAPSES |
| TUBB1    | 1      | 14.6338 | 0.777  | TRANSMISSION ACROSS CHEMICAL SYNAPSES |
| SYT1     | 1      | 51.8168 | 0.784  | TRANSMISSION ACROSS CHEMICAL SYNAPSES |
| ALDH5A1  | 1      | 6.82984 | 0.846  | TRANSMISSION ACROSS CHEMICAL SYNAPSES |

**Supplementary Table 8. Genes within expression community maps and modularity ranges**

| <b>Gene</b>     | <b>Community (0-53)</b> | <b>Page rank</b> |
|-----------------|-------------------------|------------------|
| <i>FGR</i>      | 0                       | 0.000207389      |
| <i>GCLC</i>     | 4                       | 0.00013302       |
| <i>NIPAL3</i>   | 2                       | 0.000317792      |
| <i>CYP51A1</i>  | 3                       | 0.0000454        |
| <i>RAD52</i>    | 2                       | 0.000244755      |
| <i>LAP3</i>     | 5                       | 0.0000827        |
| <i>MAD1L1</i>   | 2                       | 0.000161232      |
| <i>LASP1</i>    | 1                       | 0.000212445      |
| <i>SNX11</i>    | 0                       | 0.000267431      |
| <i>TMEM176A</i> | 6                       | 0.000154847      |
| <i>ICA1</i>     | 2                       | 0.0000241        |
| <i>ALS2</i>     | 2                       | 0.000272124      |
| <i>CFLAR</i>    | 0                       | 0.000319236      |
| <i>TFPI</i>     | 4                       | 0.0000774        |
| <i>ARF5</i>     | 0                       | 0.000179664      |
| <i>PLXND1</i>   | 1                       | 0.0000941        |
| <i>FKBP4</i>    | 2                       | 0.0001935        |
| <i>RBM6</i>     | 2                       | 0.000268769      |
| <i>CAMKK1</i>   | 1                       | 0.0000635        |
| <i>SLC25A13</i> | 2                       | 0.00030961       |
| <i>SLC4A1</i>   | 4                       | 0.000194682      |
| <i>PRSS22</i>   | 7                       | 0.000151485      |
| <i>UPF1</i>     | 1                       | 0.000291971      |
| <i>SKAP2</i>    | 0                       | 0.0000695        |
| <i>SLC25A5</i>  | 3                       | 0.000200838      |
| <i>POLR2J</i>   | 0                       | 0.00021205       |
| <i>THSD7A</i>   | 8                       | 0.0002488        |
| <i>LIG3</i>     | 2                       | 0.000333005      |
| <i>ACSM3</i>    | 9                       | 0.000154847      |
| <i>FAM214B</i>  | 1                       | 0.0000864        |

|                   |    |             |
|-------------------|----|-------------|
| <i>MSL3</i>       | 0  | 0.000256808 |
| <i>TSPOAP1</i>    | 1  | 0.0000508   |
| <i>MPO</i>        | 10 | 0.000174902 |
| <i>WDR54</i>      | 3  | 0.000128426 |
| <i>ABCB4</i>      | 11 | 0.000172024 |
| <i>SOX8</i>       | 7  | 0.0000488   |
| <i>FBXL3</i>      | 0  | 0.000304971 |
| <i>ZFX</i>        | 3  | 0.000134248 |
| <i>LAMP2</i>      | 0  | 0.000235402 |
| <i>ITGA2B</i>     | 4  | 0.00011682  |
| <i>GDE1</i>       | 0  | 0.000121638 |
| <i>TMEM98</i>     | 7  | 0.000217256 |
| <i>CACNG3</i>     | 7  | 0.000247931 |
| <i>TNFRSF12A</i>  | 0  | 0.0000534   |
| <i>MAP3K9</i>     | 2  | 0.0000461   |
| <i>KDM7A</i>      | 0  | 0.00026457  |
| <i>ALDH3B1</i>    | 1  | 0.000102723 |
| <i>TTC22</i>      | 1  | 0.000136515 |
| <i>FARP2</i>      | 2  | 0.000186044 |
| <i>TBXA2R</i>     | 7  | 0.0000352   |
| <i>IFRD1</i>      | 0  | 0.000165943 |
| <i>LGALS14</i>    | 7  | 0.000249265 |
| <i>COX10</i>      | 3  | 0.000378736 |
| <i>PAF1</i>       | 0  | 0.000173608 |
| <i>SCIN</i>       | 7  | 0.000256244 |
| <i>ARSD</i>       | 0  | 0.000039    |
| <i>PNPLA4</i>     | 3  | 0.0000566   |
| <i>CDKL3</i>      | 3  | 0.0000317   |
| <i>CCDC124</i>    | 4  | 0.0000516   |
| <i>CEACAM21</i>   | 3  | 0.000248262 |
| <i>PAFAH1B1</i>   | 2  | 0.0002325   |
| <i>AC005747.1</i> | 1  | 0.0000893   |
| <i>MATK</i>       | 3  | 0.0000437   |

|                 |    |             |
|-----------------|----|-------------|
| <i>CD79B</i>    | 11 | 0.00014503  |
| <i>RPUSD1</i>   | 1  | 0.000117324 |
| <i>LUC7L</i>    | 2  | 0.000288773 |
| <i>CACNA2D2</i> | 3  | 0.0000817   |
| <i>CRAMP1</i>   | 1  | 0.00026435  |
| <i>MYLIP</i>    | 0  | 0.000232629 |
| <i>E2F2</i>     | 4  | 0.0000743   |
| <i>JARID2</i>   | 0  | 0.000194723 |
| <i>CDKL5</i>    | 0  | 0.000211663 |
| <i>CDK11A</i>   | 1  | 0.0000239   |
| <i>NADK</i>     | 1  | 0.000209487 |
| <i>DLEC1</i>    | 1  | 0.0000627   |
| <i>CYTH3</i>    | 2  | 0.0000744   |
| <i>ADAM22</i>   | 3  | 0.000113891 |
| <i>CYB561</i>   | 1  | 0.0000321   |
| <i>SPAG9</i>    | 0  | 0.00028054  |
| <i>CELSR3</i>   | 7  | 0.0000503   |
| <i>AASS</i>     | 2  | 0.0000244   |
| <i>MPND</i>     | 1  | 0.000159824 |
| <i>MGST1</i>    | 0  | 0.0000256   |
| <i>NFIX</i>     | 4  | 0.0000757   |
| <i>ST3GAL1</i>  | 2  | 0.000286823 |
| <i>MMP25</i>    | 1  | 0.0000341   |
| <i>IL32</i>     | 2  | 0.0000269   |
| <i>ETV7</i>     | 5  | 0.0000684   |
| <i>DYRK4</i>    | 3  | 0.000228871 |
| <i>HHATL</i>    | 7  | 0.000294653 |
| <i>PHF7</i>     | 2  | 0.00022974  |
| <i>SEMA3G</i>   | 7  | 0.000174522 |
| <i>STAB1</i>    | 1  | 0.0000348   |
| <i>FUZ</i>      | 0  | 0.0000727   |
| <i>SLC6A13</i>  | 7  | 0.000238273 |
| <i>PRSS3</i>    | 7  | 0.000216868 |

|                 |    |             |
|-----------------|----|-------------|
| <i>ZNF200</i>   | 0  | 0.000269771 |
| <i>BTK</i>      | 0  | 0.000234692 |
| <i>HFE</i>      | 3  | 0.0000985   |
| <i>SCMH1</i>    | 2  | 0.000258686 |
| <i>FYN</i>      | 2  | 0.000300577 |
| <i>HIVEP2</i>   | 2  | 0.000323938 |
| <i>ELOA</i>     | 2  | 0.000286588 |
| <i>MRC2</i>     | 4  | 0.0000933   |
| <i>TSPAN9</i>   | 7  | 0.000113569 |
| <i>ABHD5</i>    | 0  | 0.00016657  |
| <i>AKAP8L</i>   | 0  | 0.000238825 |
| <i>TTC19</i>    | 3  | 0.000374536 |
| <i>PLAUR</i>    | 0  | 0.000113566 |
| <i>QPCTL</i>    | 1  | 0.0000272   |
| <i>PPP5C</i>    | 2  | 0.000122966 |
| <i>TYROBP</i>   | 0  | 0.0000518   |
| <i>BRCA1</i>    | 0  | 0.00013349  |
| <i>CD22</i>     | 11 | 0.000152747 |
| <i>SEMA3B</i>   | 7  | 0.0000548   |
| <i>MBTPS2</i>   | 3  | 0.000291986 |
| <i>LTF</i>      | 10 | 0.000141965 |
| <i>EXTL3</i>    | 1  | 0.000216714 |
| <i>NR1H4</i>    | 7  | 0.000280815 |
| <i>ELOVL5</i>   | 0  | 0.000293953 |
| <i>ALOX5</i>    | 0  | 0.000161268 |
| <i>KDM5D</i>    | 12 | 0.00016609  |
| <i>CALCOCO1</i> | 1  | 0.000341552 |
| <i>EHD3</i>     | 4  | 0.0000425   |
| <i>SLC25A39</i> | 4  | 0.000218644 |
| <i>MVP</i>      | 0  | 0.000196289 |
| <i>RNF14</i>    | 4  | 0.000167246 |
| <i>DNASE1L1</i> | 0  | 0.000148716 |
| <i>TACC3</i>    | 1  | 0.00016904  |

|                 |   |             |
|-----------------|---|-------------|
| <i>POLA2</i>    | 1 | 0.000156389 |
| <i>ZC3H3</i>    | 1 | 0.000221106 |
| <i>CAPN1</i>    | 1 | 0.000103134 |
| <i>ACPP</i>     | 0 | 0.0000606   |
| <i>MTMR11</i>   | 0 | 0.0000352   |
| <i>WAS</i>      | 1 | 0.000163736 |
| <i>BID</i>      | 0 | 0.000279838 |
| <i>CHDH</i>     | 7 | 0.0000371   |
| <i>ATP2C1</i>   | 3 | 0.000388389 |
| <i>SLC38A5</i>  | 4 | 0.000053    |
| <i>RALBP1</i>   | 0 | 0.000114588 |
| <i>SLC11A1</i>  | 1 | 0.00010206  |
| <i>TTC27</i>    | 3 | 0.000330157 |
| <i>VSIG2</i>    | 7 | 0.000260815 |
| <i>CD74</i>     | 1 | 0.0000636   |
| <i>HGF</i>      | 0 | 0.0000905   |
| <i>ADGRA2</i>   | 7 | 0.0000254   |
| <i>PLEKHB1</i>  | 2 | 0.0000531   |
| <i>SERPINB1</i> | 0 | 0.000205618 |
| <i>SPAST</i>    | 0 | 0.000270609 |
| <i>OSBPL5</i>   | 1 | 0.0000648   |
| <i>CPS1</i>     | 7 | 0.000299113 |
| <i>FHL1</i>     | 4 | 0.000115153 |
| <i>RTF2</i>     | 0 | 0.000256097 |
| <i>SLC45A4</i>  | 1 | 0.000136039 |
| <i>RNF10</i>    | 4 | 0.000204315 |
| <i>GRAMD1B</i>  | 1 | 0.0000621   |
| <i>RNH1</i>     | 3 | 0.000160298 |
| <i>RB1CC1</i>   | 0 | 0.000204464 |
| <i>ALAS1</i>    | 1 | 0.000260066 |
| <i>SNAPC1</i>   | 3 | 0.0000694   |
| <i>ABCC2</i>    | 2 | 0.0000685   |
| <i>PLEKHO1</i>  | 0 | 0.000242621 |

|                 |    |             |
|-----------------|----|-------------|
| <i>UBR2</i>     | 0  | 0.000271068 |
| <i>EHD2</i>     | 7  | 0.000289873 |
| <i>DEPDC1</i>   | 14 | 0.000163692 |
| <i>CCDC28A</i>  | 0  | 0.000285226 |
| <i>RRAGD</i>    | 0  | 0.000191856 |
| <i>HSF2</i>     | 3  | 0.000237157 |
| <i>HSD17B6</i>  | 7  | 0.000245035 |
| <i>NR1H3</i>    | 1  | 0.0000416   |
| <i>TYMP</i>     | 5  | 0.00005     |
| <i>TOMM34</i>   | 3  | 0.000156203 |
| <i>VIM</i>      | 0  | 0.0001262   |
| <i>RNASET2</i>  | 0  | 0.0000522   |
| <i>CD44</i>     | 2  | 0.000315823 |
| <i>KCNG1</i>    | 7  | 0.0000239   |
| <i>AGPAT4</i>   | 2  | 0.0000564   |
| <i>MIPEP</i>    | 2  | 0.000290262 |
| <i>IFNGR1</i>   | 0  | 0.000152249 |
| <i>SH2D2A</i>   | 1  | 0.0000463   |
| <i>TNFRSF1B</i> | 1  | 0.000206832 |
| <i>POU2F2</i>   | 1  | 0.000149645 |
| <i>ANK1</i>     | 4  | 0.000148509 |
| <i>TFB1M</i>    | 3  | 0.000345528 |
| <i>BAK1</i>     | 0  | 0.0000946   |
| <i>IKZF2</i>    | 3  | 0.0000341   |
| <i>GRN</i>      | 1  | 0.000131126 |
| <i>EIPR1</i>    | 2  | 0.000360759 |
| <i>IFT88</i>    | 3  | 0.000193012 |
| <i>ABCF2</i>    | 2  | 0.000141429 |
| <i>FUT8</i>     | 3  | 0.00023938  |
| <i>GAB2</i>     | 1  | 0.00019356  |
| <i>ATP6V0A1</i> | 1  | 0.000227978 |
| <i>APBA2</i>    | 2  | 0.0000591   |
| <i>MAP2K3</i>   | 1  | 0.0000895   |

|                   |    |             |
|-------------------|----|-------------|
| <i>EFCAB1</i>     | 7  | 0.000198679 |
| <i>TMSB10</i>     | 3  | 0.00008     |
| <i>GABARAPL2</i>  | 4  | 0.000129478 |
| <i>SH3YL1</i>     | 3  | 0.000246184 |
| <i>VCL</i>        | 1  | 0.0000966   |
| <i>DAPK2</i>      | 1  | 0.00011164  |
| <i>STAP1</i>      | 11 | 0.000113431 |
| <i>AC118549.1</i> | 3  | 0.000317322 |
| <i>SLC18A1</i>    | 7  | 0.0000256   |
| <i>TUBG2</i>      | 2  | 0.0000573   |
| <i>RPL26L1</i>    | 3  | 0.0000691   |
| <i>FLT4</i>       | 7  | 0.0000244   |
| <i>FBXO42</i>     | 2  | 0.000430859 |
| <i>METTL1</i>     | 3  | 0.0000295   |
| <i>BOD1L1</i>     | 0  | 0.000225039 |
| <i>EDC4</i>       | 1  | 0.000269796 |
| <i>TRIO</i>       | 2  | 0.000120119 |
| <i>VCAN</i>       | 0  | 0.0000532   |
| <i>CLEC16A</i>    | 2  | 0.0002545   |
| <i>ZFYVE16</i>    | 0  | 0.000198456 |
| <i>PHLPP2</i>     | 4  | 0.0000814   |
| <i>SPDL1</i>      | 3  | 0.00016303  |
| <i>SLC66A1</i>    | 1  | 0.000150759 |
| <i>RTN4R</i>      | 7  | 0.00018445  |
| <i>PHF23</i>      | 0  | 0.000285095 |
| <i>RAB27B</i>     | 4  | 0.000132256 |
| <i>PARP3</i>      | 1  | 0.0000403   |
| <i>THAP3</i>      | 3  | 0.000291449 |
| <i>AIFM2</i>      | 2  | 0.000125406 |
| <i>AL049834.1</i> | 3  | 0.000130012 |
| <i>CAPG</i>       | 0  | 0.0000357   |
| <i>AP2S1</i>      | 4  | 0.000105109 |
| <i>ADAM28</i>     | 11 | 0.000137811 |

|                 |    |             |
|-----------------|----|-------------|
| <i>DCUN1D1</i>  | 4  | 0.0000967   |
| <i>LCP2</i>     | 0  | 0.000313922 |
| <i>CTNNA1</i>   | 0  | 0.0000876   |
| <i>PHKA2</i>    | 1  | 0.000319694 |
| <i>CNTLN</i>    | 0  | 0.0000507   |
| <i>DSG2</i>     | 7  | 0.000293443 |
| <i>GEMIN8</i>   | 3  | 0.000309818 |
| <i>OFD1</i>     | 3  | 0.00031567  |
| <i>TPR</i>      | 0  | 0.000280801 |
| <i>KIAA0556</i> | 1  | 0.000252452 |
| <i>DTNBP1</i>   | 2  | 0.000226856 |
| <i>XK</i>       | 4  | 0.0000842   |
| <i>SCML1</i>    | 3  | 0.0000639   |
| <i>ARHGAP6</i>  | 4  | 0.000174548 |
| <i>USP28</i>    | 3  | 0.000161595 |
| <i>HDAC9</i>    | 3  | 0.00005     |
| <i>NOP16</i>    | 3  | 0.000206987 |
| <i>RRM2B</i>    | 0  | 0.000176526 |
| <i>TNFRSF17</i> | 15 | 0.000108549 |
| <i>SNX29</i>    | 2  | 0.00023814  |
| <i>VPS13D</i>   | 2  | 0.000258723 |
| <i>ADAMTS6</i>  | 11 | 0.0000418   |
| <i>H6PD</i>     | 1  | 0.000197477 |
| <i>PER3</i>     | 2  | 0.0000304   |
| <i>LTBP1</i>    | 4  | 0.000297584 |
| <i>RCN1</i>     | 3  | 0.0000271   |
| <i>RFC2</i>     | 0  | 0.000328576 |
| <i>ARID1B</i>   | 2  | 0.000310793 |
| <i>FOXP3</i>    | 1  | 0.0000316   |
| <i>HEXB</i>     | 0  | 0.000295126 |
| <i>PTCD2</i>    | 2  | 0.000310843 |
| <i>DKK3</i>     | 7  | 0.000141368 |
| <i>MCUR1</i>    | 3  | 0.00010081  |

|                 |    |             |
|-----------------|----|-------------|
| <i>LIMA1</i>    | 3  | 0.000128945 |
| <i>LAMC3</i>    | 7  | 0.000273491 |
| <i>HOMER3</i>   | 0  | 0.0000435   |
| <i>RAD51</i>    | 7  | 0.0000236   |
| <i>POLQ</i>     | 14 | 0.000230782 |
| <i>THOC3</i>    | 3  | 0.000171649 |
| <i>HEBP2</i>    | 0  | 0.000221345 |
| <i>PLEKHA5</i>  | 3  | 0.0000309   |
| <i>RRP12</i>    | 1  | 0.0000513   |
| <i>FNIP2</i>    | 2  | 0.000251565 |
| <i>FSTL4</i>    | 7  | 0.000202626 |
| <i>USE1</i>     | 1  | 0.0000585   |
| <i>THRAP3</i>   | 0  | 0.00026408  |
| <i>PHPT1</i>    | 3  | 0.00013054  |
| <i>ENTPD2</i>   | 7  | 0.0000237   |
| <i>LY75</i>     | 0  | 0.000191399 |
| <i>OPN3</i>     | 3  | 0.000212625 |
| <i>SDCCAG8</i>  | 2  | 0.000312865 |
| <i>PTPRN</i>    | 7  | 0.000268994 |
| <i>HHAT</i>     | 2  | 0.0000816   |
| <i>KIF1B</i>    | 1  | 0.000117045 |
| <i>FOXC1</i>    | 7  | 0.000200715 |
| <i>TBC1D22A</i> | 2  | 0.000322339 |
| <i>SYNE2</i>    | 2  | 0.00020832  |
| <i>RELT</i>     | 1  | 0.000244369 |
| <i>TAB2</i>     | 0  | 0.000336399 |
| <i>EIF2AK2</i>  | 5  | 0.000120206 |
| <i>KMT2C</i>    | 2  | 0.000289519 |
| <i>ITIH4</i>    | 1  | 0.0000263   |
| <i>DCBLD2</i>   | 3  | 0.0000483   |
| <i>SOAT1</i>    | 0  | 0.000337661 |
| <i>PKP2</i>     | 7  | 0.0000314   |
| <i>PRDM1</i>    | 0  | 0.0000886   |

|                 |    |             |
|-----------------|----|-------------|
| <i>TMCC3</i>    | 0  | 0.000167076 |
| <i>PITHD1</i>   | 4  | 0.000138211 |
| <i>MTA3</i>     | 2  | 0.0002564   |
| <i>USP13</i>    | 2  | 0.000264434 |
| <i>CROCC</i>    | 1  | 0.0000825   |
| <i>ATP2B4</i>   | 2  | 0.000173067 |
| <i>YIPF1</i>    | 0  | 0.000249042 |
| <i>DGKG</i>     | 1  | 0.0000867   |
| <i>FLYWCH1</i>  | 1  | 0.0000692   |
| <i>UNKL</i>     | 1  | 0.000251663 |
| <i>TBXAS1</i>   | 0  | 0.000260724 |
| <i>ALDH18A1</i> | 2  | 0.000264842 |
| <i>TARBP1</i>   | 3  | 0.000304668 |
| <i>MXD1</i>     | 0  | 0.00020851  |
| <i>SLC2A3</i>   | 0  | 0.00010851  |
| <i>CTDP1</i>    | 0  | 0.000221439 |
| <i>YBX3</i>     | 4  | 0.000219523 |
| <i>WNK1</i>     | 4  | 0.0000892   |
| <i>OGFR</i>     | 0  | 0.000136992 |
| <i>GNA15</i>    | 0  | 0.0000728   |
| <i>RIMBP2</i>   | 7  | 0.000206677 |
| <i>QSER1</i>    | 2  | 0.000255635 |
| <i>LZTS1</i>    | 7  | 0.000270157 |
| <i>NCKAP1</i>   | 3  | 0.0000254   |
| <i>GUCY1B1</i>  | 4  | 0.000330147 |
| <i>DGAT2</i>    | 0  | 0.000126039 |
| <i>CS</i>       | 2  | 0.000282163 |
| <i>LTK</i>      | 16 | 0.000154847 |
| <i>MRPS24</i>   | 3  | 0.0000245   |
| <i>VMP1</i>     | 0  | 0.000227615 |
| <i>SEZ6</i>     | 7  | 0.000274229 |
| <i>SLC6A16</i>  | 2  | 0.000124725 |
| <i>BICRA</i>    | 1  | 0.000129968 |

|          |   |             |
|----------|---|-------------|
| CA11     | 7 | 0.000046    |
| U2AF2    | 1 | 0.000270239 |
| EPN1     | 1 | 0.000246479 |
| AHRR     | 7 | 0.000115958 |
| ZNF275   | 2 | 0.000198093 |
| HAGH     | 4 | 0.000212795 |
| CASP8    | 0 | 0.000313957 |
| ST3GAL6  | 0 | 0.00013936  |
| CDON     | 7 | 0.000153173 |
| HIPK2    | 1 | 0.000129152 |
| TMEM161A | 1 | 0.0000957   |
| CTSA     | 1 | 0.000113379 |
| CNN2     | 1 | 0.000147566 |
| ABCA7    | 1 | 0.000106634 |
| FAR2     | 0 | 0.0000987   |
| BCAS1    | 7 | 0.0000568   |
| SBNO2    | 1 | 0.000148819 |
| CALCRL   | 3 | 0.0000249   |
| ANKS1A   | 1 | 0.000260724 |
| UHRF1BP1 | 2 | 0.000138531 |
| GNAI3    | 0 | 0.000339391 |
| OAT      | 0 | 0.000177815 |
| WDR3     | 3 | 0.000271668 |
| PKN2     | 0 | 0.000174361 |
| WDR18    | 3 | 0.0000717   |
| DGKA     | 2 | 0.000185178 |
| PDIA5    | 2 | 0.000028    |
| TBC1D22B | 4 | 0.000106235 |
| MYLK     | 4 | 0.000203983 |
| MAP2K4   | 0 | 0.000240554 |
| PACC1    | 3 | 0.000393609 |
| SLK      | 0 | 0.000188501 |
| CYB5R4   | 0 | 0.000248437 |

|                 |    |             |
|-----------------|----|-------------|
| <i>SEC61A2</i>  | 2  | 0.000144108 |
| <i>TLE2</i>     | 7  | 0.000157933 |
| <i>MTHFD2</i>   | 3  | 0.000137072 |
| <i>SLC9A7</i>   | 11 | 0.00025974  |
| <i>YBX1</i>     | 4  | 0.000119579 |
| <i>PDE4A</i>    | 1  | 0.0000491   |
| <i>PPP2R5A</i>  | 0  | 0.00014532  |
| <i>KDM4A</i>    | 2  | 0.000387279 |
| <i>ASPM</i>     | 14 | 0.000215478 |
| <i>SPI1</i>     | 1  | 0.000120841 |
| <i>ATXN3</i>    | 3  | 0.00042134  |
| <i>TRMT11</i>   | 3  | 0.000289985 |
| <i>ZFAT</i>     | 2  | 0.000264611 |
| <i>MTFR1</i>    | 3  | 0.000168437 |
| <i>FECH</i>     | 4  | 0.00015351  |
| <i>DDX3Y</i>    | 12 | 0.000165137 |
| <i>PFKP</i>     | 2  | 0.00012951  |
| <i>IDI1</i>     | 3  | 0.000131099 |
| <i>SP100</i>    | 0  | 0.000171756 |
| <i>PLPP1</i>    | 2  | 0.000109887 |
| <i>NEO1</i>     | 2  | 0.0000376   |
| <i>TNFRSF1A</i> | 1  | 0.000227512 |
| <i>CACNB1</i>   | 1  | 0.000151715 |
| <i>STOML1</i>   | 3  | 0.0000253   |
| <i>TRO</i>      | 7  | 0.000124708 |
| <i>RHOA</i>     | 0  | 0.000318146 |
| <i>PRKCZ</i>    | 1  | 0.000164992 |
| <i>ZFY</i>      | 12 | 0.000165137 |
| <i>ROGDI</i>    | 4  | 0.0000506   |
| <i>PDZD4</i>    | 3  | 0.0000437   |
| <i>ATP2B3</i>   | 7  | 0.00019313  |
| <i>ROCK1</i>    | 0  | 0.000237936 |
| <i>HYAL2</i>    | 0  | 0.000101768 |

|                      |   |             |
|----------------------|---|-------------|
| <i>PLEKHH3</i>       | 7 | 0.000285341 |
| <i>MEF2A</i>         | 0 | 0.000204574 |
| <i>TFE3</i>          | 1 | 0.00025742  |
| <i>ACSL4</i>         | 0 | 0.000193936 |
| <i>INPP5A</i>        | 0 | 0.00024492  |
| <i>POLR1A</i>        | 2 | 0.000257527 |
| <i>LAPTM4A</i>       | 0 | 0.000209576 |
| <i>STON1-GTF2A1L</i> | 7 | 0.000172857 |
| <i>PPP2R5B</i>       | 4 | 0.0000767   |
| <i>PYGM</i>          | 1 | 0.000147238 |
| <i>MAST4</i>         | 2 | 0.0000976   |
| <i>BCL3</i>          | 1 | 0.0000779   |
| <i>KCNAB2</i>        | 1 | 0.000197157 |
| <i>MAOB</i>          | 7 | 0.0000476   |
| <i>RORA</i>          | 3 | 0.000187978 |
| <i>DRD4</i>          | 7 | 0.0000934   |
| <i>TGFBR3</i>        | 3 | 0.000119437 |
| <i>PIGB</i>          | 0 | 0.0000873   |
| <i>GNB5</i>          | 3 | 0.000236805 |
| <i>RAB27A</i>        | 0 | 0.000260622 |
| <i>LRP6</i>          | 3 | 0.0000313   |
| <i>PHRF1</i>         | 1 | 0.00024485  |
| <i>NUCB2</i>         | 3 | 0.000130421 |
| <i>PFN2</i>          | 3 | 0.0000239   |
| <i>SPTB</i>          | 4 | 0.0000952   |
| <i>DAPP1</i>         | 0 | 0.000153652 |
| <i>DGCR2</i>         | 1 | 0.000262791 |
| <i>MNT</i>           | 1 | 0.000195853 |
| <i>WIPI1</i>         | 0 | 0.0000699   |
| <i>NDST1</i>         | 1 | 0.0000994   |
| <i>ASNS</i>          | 2 | 0.0000936   |
| <i>AP3M2</i>         | 3 | 0.000231213 |
| <i>ST6GALNAC2</i>    | 1 | 0.000114018 |

|                 |    |             |
|-----------------|----|-------------|
| <i>PABPC1</i>   | 2  | 0.000195657 |
| <i>TESK2</i>    | 0  | 0.000235453 |
| <i>SLC12A3</i>  | 7  | 0.000237572 |
| <i>NCK2</i>     | 2  | 0.00020224  |
| <i>WDR1</i>     | 1  | 0.000375247 |
| <i>ARHGAP10</i> | 2  | 0.0000675   |
| <i>RPS6KA2</i>  | 13 | 0.0000832   |
| <i>SEL1L</i>    | 0  | 0.000342534 |
| <i>ATP6AP1</i>  | 1  | 0.000304863 |
| <i>TCF3</i>     | 4  | 0.0000593   |
| <i>TRIB2</i>    | 3  | 0.000225076 |
| <i>FAM50A</i>   | 3  | 0.000210442 |
| <i>FAM3A</i>    | 1  | 0.0000985   |
| <i>CPSF1</i>    | 1  | 0.000071    |
| <i>CYBRD1</i>   | 0  | 0.0000235   |
| <i>ACTN1</i>    | 1  | 0.000223852 |
| <i>ZFYVE26</i>  | 2  | 0.000298451 |
| <i>RPS6KA6</i>  | 7  | 0.0000254   |
| <i>EPN2</i>     | 13 | 0.0001032   |
| <i>LIMS2</i>    | 7  | 0.0000982   |
| <i>TFRC</i>     | 4  | 0.0000902   |
| <i>UBE2D1</i>   | 0  | 0.0000858   |
| <i>RHOBTB1</i>  | 4  | 0.000189411 |
| <i>SMC1A</i>    | 2  | 0.00014613  |
| <i>HSD17B10</i> | 3  | 0.000233918 |
| <i>HMMR</i>     | 14 | 0.000176114 |
| <i>TRHDE</i>    | 7  | 0.000147005 |
| <i>P4HA2</i>    | 0  | 0.0000265   |
| <i>ACADVL</i>   | 0  | 0.000197805 |
| <i>ACAP1</i>    | 1  | 0.000200955 |
| <i>EVC</i>      | 7  | 0.000115034 |
| <i>SIDT1</i>    | 2  | 0.000247288 |
| <i>NDE1</i>     | 1  | 0.000230673 |

|                  |    |             |
|------------------|----|-------------|
| <i>MRVI1</i>     | 0  | 0.00011179  |
| <i>PVR</i>       | 1  | 0.0000236   |
| <i>SCARB1</i>    | 1  | 0.0000422   |
| <i>MCM2</i>      | 14 | 0.000113761 |
| <i>PANX2</i>     | 1  | 0.0000699   |
| <i>SELENOO</i>   | 1  | 0.000158735 |
| <i>LLGL2</i>     | 1  | 0.000126201 |
| <i>PDE8A</i>     | 2  | 0.000308396 |
| <i>NLE1</i>      | 3  | 0.000155176 |
| <i>FNDC8</i>     | 7  | 0.000255903 |
| <i>GSDMB</i>     | 2  | 0.000108272 |
| <i>ADAM11</i>    | 7  | 0.000332033 |
| <i>PPP2R3A</i>   | 7  | 0.000117719 |
| <i>PTGS2</i>     | 0  | 0.0000412   |
| <i>IGF2BP2</i>   | 4  | 0.000130984 |
| <i>MAP3K13</i>   | 17 | 0.000154847 |
| <i>ST6GAL1</i>   | 2  | 0.000257796 |
| <i>TBX21</i>     | 3  | 0.000128376 |
| <i>PICALM</i>    | 0  | 0.000236574 |
| <i>MRPS34</i>    | 3  | 0.000131414 |
| <i>CA12</i>      | 7  | 0.000302205 |
| <i>MGLL</i>      | 4  | 0.000100003 |
| <i>BCS1L</i>     | 2  | 0.000284367 |
| <i>ZNF532</i>    | 2  | 0.0000417   |
| <i>MYDGF</i>     | 3  | 0.000200093 |
| <i>ARHGEF10L</i> | 1  | 0.0000707   |
| <i>TXK</i>       | 3  | 0.000114775 |
| <i>EIF4G3</i>    | 2  | 0.000203059 |
| <i>GTSE1</i>     | 7  | 0.0000873   |
| <i>SEMA3C</i>    | 0  | 0.0000733   |
| <i>TTC38</i>     | 3  | 0.0000833   |
| <i>GRAMD4</i>    | 0  | 0.000110112 |
| <i>CELSR1</i>    | 11 | 0.000150857 |

|                 |    |             |
|-----------------|----|-------------|
| <i>TIMM21</i>   | 3  | 0.000361544 |
| <i>VPS9D1</i>   | 1  | 0.0000919   |
| <i>MARK3</i>    | 0  | 0.000225198 |
| <i>FOSL2</i>    | 1  | 0.000206673 |
| <i>FSCN1</i>    | 1  | 0.0000299   |
| <i>ACTB</i>     | 1  | 0.000128207 |
| <i>MOCOS</i>    | 7  | 0.000276534 |
| <i>PLD1</i>     | 0  | 0.000125267 |
| <i>SEC31B</i>   | 1  | 0.000131493 |
| <i>ARHGAP15</i> | 0  | 0.000187458 |
| <i>EXOSC7</i>   | 3  | 0.000369038 |
| <i>REXO2</i>    | 3  | 0.000186485 |
| <i>PTPN23</i>   | 1  | 0.000235391 |
| <i>FMO4</i>     | 3  | 0.000237344 |
| <i>SLC46A1</i>  | 2  | 0.0000557   |
| <i>PLXNA2</i>   | 1  | 0.0000244   |
| <i>SPAG5</i>    | 14 | 0.000191519 |
| <i>ANKRD13A</i> | 0  | 0.000309433 |
| <i>TPD52</i>    | 3  | 0.00015357  |
| <i>ACACB</i>    | 2  | 0.000154463 |
| <i>ICAM3</i>    | 0  | 0.000160312 |
| <i>NT5C2</i>    | 0  | 0.000249776 |
| <i>MCAM</i>     | 7  | 0.00031064  |
| <i>GPC4</i>     | 7  | 0.0000338   |
| <i>MBNL3</i>    | 4  | 0.0000907   |
| <i>MAP2K7</i>   | 4  | 0.000158481 |
| <i>NFKB2</i>    | 1  | 0.000219791 |
| <i>UBE2T</i>    | 14 | 0.000170649 |
| <i>PPP1R12B</i> | 1  | 0.000104692 |
| <i>IL4R</i>     | 1  | 0.0000258   |
| <i>PAK3</i>     | 7  | 0.0000999   |
| <i>EXOSC5</i>   | 3  | 0.000201112 |
| <i>APBB1IP</i>  | 0  | 0.000219242 |

|                 |    |             |
|-----------------|----|-------------|
| <i>LRCH4</i>    | 1  | 0.000257201 |
| <i>GPR137B</i>  | 2  | 0.000031    |
| <i>JADE1</i>    | 0  | 0.000391243 |
| <i>SLC25A43</i> | 2  | 0.0000935   |
| <i>LAMP3</i>    | 5  | 0.000106609 |
| <i>NEBL</i>     | 18 | 0.000154847 |
| <i>ACER3</i>    | 0  | 0.000237203 |
| <i>N4BP2</i>    | 3  | 0.00022106  |
| <i>TIGAR</i>    | 2  | 0.000243448 |
| <i>TULP3</i>    | 2  | 0.000126252 |
| <i>SYNJ2</i>    | 2  | 0.0000485   |
| <i>PPP2R5C</i>  | 2  | 0.00038893  |
| <i>HOXA9</i>    | 7  | 0.000188842 |
| <i>MLLT10</i>   | 2  | 0.000369733 |
| <i>ZCWPW1</i>   | 3  | 0.000216906 |
| <i>P2RY10</i>   | 3  | 0.0000852   |
| <i>NRDC</i>     | 0  | 0.000315198 |
| <i>TNRC6C</i>   | 2  | 0.000261781 |
| <i>TP53INP2</i> | 1  | 0.0000433   |
| <i>OSBPL6</i>   | 7  | 0.00012948  |
| <i>MKNK1</i>    | 1  | 0.000136635 |
| <i>TNS1</i>     | 4  | 0.000143116 |
| <i>CDC14A</i>   | 3  | 0.000257631 |
| <i>RAPGEF3</i>  | 11 | 0.000163673 |
| <i>LIPE</i>     | 1  | 0.0000743   |
| <i>FDFT1</i>    | 3  | 0.000337002 |
| <i>PGM1</i>     | 0  | 0.00025272  |
| <i>DNM2</i>     | 1  | 0.000303967 |
| <i>EPB41L2</i>  | 2  | 0.0000942   |
| <i>MOXD1</i>    | 7  | 0.0000259   |
| <i>RABL2B</i>   | 1  | 0.000192563 |
| <i>PTPRH</i>    | 7  | 0.000290076 |
| <i>DCT</i>      | 7  | 0.000186295 |

|                 |    |             |
|-----------------|----|-------------|
| <i>RAB21</i>    | 0  | 0.000372421 |
| <i>SLC4A4</i>   | 3  | 0.0000818   |
| <i>SESN1</i>    | 3  | 0.000205287 |
| <i>PSEN1</i>    | 0  | 0.000327904 |
| <i>CLDND1</i>   | 3  | 0.000285934 |
| <i>MOK</i>      | 7  | 0.0000341   |
| <i>HSP90AA1</i> | 3  | 0.0000688   |
| <i>IGSF9B</i>   | 1  | 0.0000321   |
| <i>NDC80</i>    | 14 | 0.000144638 |
| <i>MAGI3</i>    | 2  | 0.0000333   |
| <i>CXCL2</i>    | 7  | 0.0000344   |
| <i>COL4A4</i>   | 11 | 0.0000902   |
| <i>TCF7</i>     | 2  | 0.0000769   |
| <i>IMPG2</i>    | 3  | 0.000150641 |
| <i>EXD2</i>     | 2  | 0.000312994 |
| <i>MEF2C</i>    | 3  | 0.000118669 |
| <i>ZNF506</i>   | 3  | 0.000330384 |
| <i>AACS</i>     | 2  | 0.000190572 |
| <i>DELE1</i>    | 2  | 0.000280399 |
| <i>PCDHGA2</i>  | 7  | 0.000267329 |
| <i>PHLPP1</i>   | 0  | 0.000117773 |
| <i>SMARCD3</i>  | 0  | 0.0000445   |
| <i>STRADB</i>   | 4  | 0.000245837 |
| <i>C1QTNF3</i>  | 2  | 0.00017827  |
| <i>COL19A1</i>  | 11 | 0.0000767   |
| <i>EPB41L3</i>  | 0  | 0.0000355   |
| <i>COBLL1</i>   | 11 | 0.000172515 |
| <i>DLG3</i>     | 2  | 0.000065    |
| <i>TRAF5</i>    | 3  | 0.00029218  |
| <i>MRPL22</i>   | 3  | 0.000270109 |
| <i>NFE2L1</i>   | 0  | 0.000320347 |
| <i>ITGB5</i>    | 4  | 0.000305817 |
| <i>ERC1</i>     | 2  | 0.000237908 |

|                |    |             |
|----------------|----|-------------|
| <i>RNF13</i>   | 0  | 0.000219968 |
| <i>BCKDHB</i>  | 3  | 0.000308742 |
| <i>PLOD1</i>   | 1  | 0.0000759   |
| <i>P2RX5</i>   | 11 | 0.0000507   |
| <i>OXCT1</i>   | 3  | 0.000287483 |
| <i>SLC27A5</i> | 2  | 0.00013018  |
| <i>ZNF324</i>  | 1  | 0.000343765 |
| <i>ZNF671</i>  | 3  | 0.000316954 |
| <i>ZNF586</i>  | 0  | 0.000301831 |
| <i>ZNF446</i>  | 1  | 0.000148939 |
| <i>RPS5</i>    | 3  | 0.0001063   |
| <i>FAT1</i>    | 7  | 0.0000239   |
| <i>SMAP2</i>   | 1  | 0.000147335 |
| <i>PPIE</i>    | 3  | 0.0000789   |
| <i>NOA1</i>    | 3  | 0.00034905  |
| <i>HAL</i>     | 0  | 0.000158887 |
| <i>GSTP1</i>   | 3  | 0.0000988   |
| <i>APLP2</i>   | 0  | 0.000268529 |
| <i>MAPRE3</i>  | 1  | 0.0000427   |
| <i>CD82</i>    | 0  | 0.0001508   |
| <i>BCORL1</i>  | 1  | 0.000179831 |
| <i>FCN1</i>    | 0  | 0.0000767   |
| <i>OVGP1</i>   | 2  | 0.0000565   |
| <i>MAP3K4</i>  | 2  | 0.0003516   |
| <i>PILRA</i>   | 1  | 0.000146794 |
| <i>ABCB1</i>   | 3  | 0.0000722   |
| <i>ZNF213</i>  | 1  | 0.000189198 |
| <i>CPNE3</i>   | 0  | 0.000326107 |
| <i>CTTN</i>    | 4  | 0.000347297 |
| <i>WNT11</i>   | 7  | 0.000125984 |
| <i>MGST2</i>   | 0  | 0.0000383   |
| <i>USP40</i>   | 2  | 0.000257108 |
| <i>B4GALT1</i> | 1  | 0.000205627 |

|                 |    |             |
|-----------------|----|-------------|
| <i>CHMP5</i>    | 3  | 0.0000605   |
| <i>IPO11</i>    | 3  | 0.000316021 |
| <i>EIF2AK1</i>  | 4  | 0.000210937 |
| <i>NME8</i>     | 0  | 0.0000409   |
| <i>SNX10</i>    | 0  | 0.000198443 |
| <i>MRPL28</i>   | 0  | 0.000206116 |
| <i>ITPKC</i>    | 0  | 0.000258571 |
| <i>CEACAM6</i>  | 10 | 0.000225835 |
| <i>TXLNG</i>    | 3  | 0.000171531 |
| <i>LAT2</i>     | 0  | 0.000235145 |
| <i>ALG9</i>     | 2  | 0.000289508 |
| <i>PPP1R15A</i> | 1  | 0.0000651   |
| <i>SRRT</i>     | 1  | 0.000262637 |
| <i>BAX</i>      | 3  | 0.000255466 |
| <i>PGS1</i>     | 1  | 0.000150783 |
| <i>LPCAT2</i>   | 0  | 0.000108722 |
| <i>GNAO1</i>    | 7  | 0.000036    |
| <i>TXNDC16</i>  | 3  | 0.000217798 |
| <i>NID2</i>     | 7  | 0.000324159 |
| <i>GNAS</i>     | 4  | 0.0000644   |
| <i>ERGIC2</i>   | 3  | 0.000161033 |
| <i>AURKA</i>    | 14 | 0.0000846   |
| <i>CASS4</i>    | 0  | 0.000194048 |
| <i>AAMDC</i>    | 3  | 0.000069    |
| <i>RFX2</i>     | 1  | 0.0000922   |
| <i>SULT2B1</i>  | 7  | 0.000260344 |
| <i>GP6</i>      | 4  | 0.00013212  |
| <i>GNA11</i>    | 7  | 0.0000244   |
| <i>TPX2</i>     | 14 | 0.000218104 |
| <i>DOCK9</i>    | 2  | 0.000228157 |
| <i>DOCK3</i>    | 2  | 0.0000442   |
| <i>C3orf18</i>  | 3  | 0.000247109 |
| <i>PPP1R13B</i> | 2  | 0.000168785 |

|                 |    |             |
|-----------------|----|-------------|
| <i>SMOX</i>     | 4  | 0.0000453   |
| <i>SIGLEC1</i>  | 5  | 0.000136027 |
| <i>NSFL1C</i>   | 0  | 0.000190044 |
| <i>MAVS</i>     | 1  | 0.000266125 |
| <i>F11</i>      | 7  | 0.000288576 |
| <i>TESC</i>     | 4  | 0.000166327 |
| <i>SIRPG</i>    | 2  | 0.0000651   |
| <i>MAPKAPK5</i> | 2  | 0.00040635  |
| <i>P2RX7</i>    | 2  | 0.0000453   |
| <i>TASP1</i>    | 3  | 0.000332241 |
| <i>OAS1</i>     | 5  | 0.000164191 |
| <i>KIF16B</i>   | 2  | 0.0000934   |
| <i>CHGB</i>     | 7  | 0.000290923 |
| <i>ERP29</i>    | 2  | 0.0000374   |
| <i>FUS</i>      | 2  | 0.000190287 |
| <i>GRAMD1A</i>  | 1  | 0.000195498 |
| <i>HEPH</i>     | 19 | 0.000154847 |
| <i>GMIP</i>     | 1  | 0.000176947 |
| <i>BIRC5</i>    | 14 | 0.000186684 |
| <i>MLF2</i>     | 0  | 0.000197494 |
| <i>OTUB2</i>    | 7  | 0.000297985 |
| <i>ZBTB25</i>   | 2  | 0.000287478 |
| <i>ARHGAP4</i>  | 1  | 0.000148045 |
| <i>DHX32</i>    | 3  | 0.000199316 |
| <i>BLVRB</i>    | 4  | 0.000137897 |
| <i>PCBP4</i>    | 3  | 0.0000357   |
| <i>NUDC</i>     | 3  | 0.000180096 |
| <i>MAEA</i>     | 1  | 0.000259068 |
| <i>ICAM1</i>    | 1  | 0.000097    |
| <i>IRAK3</i>    | 0  | 0.000088    |
| <i>LYZ</i>      | 0  | 0.0000285   |
| <i>PDCD7</i>    | 3  | 0.00031444  |
| <i>FLT3LG</i>   | 1  | 0.0000441   |

|                |    |             |
|----------------|----|-------------|
| <i>GOLGA3</i>  | 2  | 0.000286151 |
| <i>CD209</i>   | 7  | 0.000161192 |
| <i>MCOLN1</i>  | 4  | 0.0001029   |
| <i>USP48</i>   | 0  | 0.000411037 |
| <i>EFNB1</i>   | 1  | 0.0000699   |
| <i>PDPR</i>    | 1  | 0.0000379   |
| <i>AARS1</i>   | 3  | 0.000178492 |
| <i>TNRC6A</i>  | 2  | 0.000280527 |
| <i>DLL3</i>    | 7  | 0.000284606 |
| <i>NAT14</i>   | 7  | 0.0000521   |
| <i>POU4F3</i>  | 7  | 0.000269255 |
| <i>NLRC4</i>   | 0  | 0.000136718 |
| <i>PUS7</i>    | 3  | 0.00010121  |
| <i>IL5RA</i>   | 13 | 0.000217127 |
| <i>ABCC6</i>   | 1  | 0.0000358   |
| <i>CMTM6</i>   | 0  | 0.000186526 |
| <i>ITGA6</i>   | 3  | 0.000159185 |
| <i>MAP3K20</i> | 0  | 0.0000518   |
| <i>SEL1L3</i>  | 2  | 0.000210406 |
| <i>CDV3</i>    | 0  | 0.000226522 |
| <i>ALKBH5</i>  | 0  | 0.000234544 |
| <i>SPAG7</i>   | 3  | 0.000082    |
| <i>ESR1</i>    | 7  | 0.0000323   |
| <i>CD200</i>   | 11 | 0.0000872   |
| <i>CMA1</i>    | 7  | 0.000228117 |
| <i>PPP2R3C</i> | 0  | 0.000150471 |
| <i>HAUS4</i>   | 0  | 0.000038    |
| <i>OSGEP</i>   | 3  | 0.000350372 |
| <i>RNF31</i>   | 1  | 0.000198371 |
| <i>RPGRIP1</i> | 0  | 0.0000334   |
| <i>TGM1</i>    | 1  | 0.0000331   |
| <i>CAPN3</i>   | 2  | 0.000120678 |
| <i>TBX15</i>   | 7  | 0.00029792  |

|                 |    |             |
|-----------------|----|-------------|
| <i>PHGDH</i>    | 7  | 0.0000494   |
| <i>TEKT2</i>    | 7  | 0.000119937 |
| <i>RFFL</i>     | 1  | 0.000224334 |
| <i>DPYSL2</i>   | 0  | 0.0000895   |
| <i>NUP50</i>    | 0  | 0.000285181 |
| <i>COMT</i>     | 1  | 0.000229338 |
| <i>ADA2</i>     | 1  | 0.0000815   |
| <i>VNN3</i>     | 0  | 0.0000549   |
| <i>LRRFIP2</i>  | 0  | 0.000335353 |
| <i>XYLB</i>     | 2  | 0.0000236   |
| <i>HDAC6</i>    | 2  | 0.00022256  |
| <i>CDC6</i>     | 14 | 0.000185643 |
| <i>CBX5</i>     | 2  | 0.000184104 |
| <i>FMO2</i>     | 7  | 0.000246636 |
| <i>MAP3K1</i>   | 0  | 0.000340407 |
| <i>DHPS</i>     | 2  | 0.000179607 |
| <i>PTGS1</i>    | 4  | 0.000199107 |
| <i>SH2D3C</i>   | 1  | 0.000237002 |
| <i>NANS</i>     | 0  | 0.000288692 |
| <i>TBC1D2</i>   | 1  | 0.000204585 |
| <i>IKZF5</i>    | 3  | 0.000182539 |
| <i>BLNK</i>     | 11 | 0.000240193 |
| <i>CYP26A1</i>  | 7  | 0.00025419  |
| <i>TDRD1</i>    | 7  | 0.0000281   |
| <i>CREM</i>     | 3  | 0.000249729 |
| <i>HIVEP1</i>   | 0  | 0.000168849 |
| <i>TREM2</i>    | 7  | 0.0000249   |
| <i>CRISP3</i>   | 10 | 0.000115779 |
| <i>FKBP5</i>    | 0  | 0.0000538   |
| <i>SRPK1</i>    | 0  | 0.000121716 |
| <i>TMEM14A</i>  | 3  | 0.000156897 |
| <i>HSP90AB1</i> | 2  | 0.000174587 |
| <i>HNRNPH3</i>  | 3  | 0.0000311   |

|                  |    |             |
|------------------|----|-------------|
| <i>ACOT7</i>     | 7  | 0.000162464 |
| <i>SH3GLB1</i>   | 0  | 0.000240058 |
| <i>CDC7</i>      | 14 | 0.0000737   |
| <i>SYDE2</i>     | 3  | 0.00004     |
| <i>PCSK5</i>     | 2  | 0.000101156 |
| <i>ABLIM1</i>    | 2  | 0.000199327 |
| <i>ERMP1</i>     | 2  | 0.00023156  |
| <i>MACROH2A2</i> | 2  | 0.000032    |
| <i>MAST3</i>     | 1  | 0.000205661 |
| <i>OCEL1</i>     | 1  | 0.0000574   |
| <i>MYO9B</i>     | 1  | 0.000248782 |
| <i>KCNK6</i>     | 1  | 0.000176938 |
| <i>FBXL19</i>    | 1  | 0.000192189 |
| <i>STX1B</i>     | 7  | 0.000184371 |
| <i>ATP5F1D</i>   | 1  | 0.0000496   |
| <i>PRKY</i>      | 12 | 0.00016609  |
| <i>IGFALS</i>    | 7  | 0.0000951   |
| <i>MARCHF2</i>   | 4  | 0.000137204 |
| <i>TECR</i>      | 2  | 0.000123923 |
| <i>CDC34</i>     | 4  | 0.000248957 |
| <i>MTAP</i>      | 3  | 0.000356103 |
| <i>CEP170B</i>   | 7  | 0.000276003 |
| <i>POLR2E</i>    | 1  | 0.000168134 |
| <i>POLRMT</i>    | 1  | 0.00014731  |
| <i>RASSF7</i>    | 3  | 0.000125786 |
| <i>GADD45B</i>   | 0  | 0.0000383   |
| <i>MADCAM1</i>   | 7  | 0.0000891   |
| <i>MKNK2</i>     | 1  | 0.000168365 |
| <i>SNAP29</i>    | 0  | 0.000275268 |
| <i>SMARCB1</i>   | 1  | 0.0000823   |
| <i>P2RX6</i>     | 7  | 0.000265754 |
| <i>BCL2L13</i>   | 4  | 0.000139488 |
| <i>SUSD2</i>     | 7  | 0.000170066 |

|                |   |             |
|----------------|---|-------------|
| <i>YPEL1</i>   | 2 | 0.00013513  |
| <i>MAPK1</i>   | 0 | 0.000323764 |
| <i>GGT1</i>    | 1 | 0.0000244   |
| <i>PPM1F</i>   | 1 | 0.000155115 |
| <i>SLC35E4</i> | 1 | 0.0000332   |
| <i>CRYBB3</i>  | 7 | 0.000074    |
| <i>CYTH4</i>   | 0 | 0.000237814 |
| <i>MFNG</i>    | 1 | 0.000255711 |
| <i>LRP5L</i>   | 2 | 0.000101546 |
| <i>GRK3</i>    | 2 | 0.000200167 |
| <i>SH3BP1</i>  | 1 | 0.000123847 |
| <i>SEZ6L</i>   | 7 | 0.0000452   |
| <i>LGALS1</i>  | 3 | 0.0000427   |
| <i>HPS4</i>    | 2 | 0.000350814 |
| <i>PIK3IP1</i> | 3 | 0.000159229 |
| <i>SRRD</i>    | 4 | 0.00032171  |
| <i>PATZ1</i>   | 2 | 0.00026312  |
| <i>TRIOBP</i>  | 1 | 0.000221507 |
| <i>TFIP11</i>  | 0 | 0.000154841 |
| <i>CRYBB1</i>  | 7 | 0.000217065 |
| <i>CCDC134</i> | 1 | 0.000175559 |
| <i>PICK1</i>   | 1 | 0.000126228 |
| <i>DMC1</i>    | 7 | 0.0000287   |
| <i>JOSD1</i>   | 3 | 0.000287188 |
| <i>FBXO7</i>   | 4 | 0.00017224  |
| <i>RAB36</i>   | 1 | 0.0000427   |
| <i>CYB5R3</i>  | 1 | 0.0000937   |
| <i>LMF2</i>    | 1 | 0.000202354 |
| <i>RHBDD3</i>  | 3 | 0.000180887 |
| <i>PACSIN2</i> | 0 | 0.000217594 |
| <i>RASL10A</i> | 7 | 0.000316005 |
| <i>TOM1</i>    | 1 | 0.000178236 |
| <i>CHKB</i>    | 1 | 0.0000496   |

|                 |    |             |
|-----------------|----|-------------|
| <i>THOC5</i>    | 1  | 0.000253073 |
| <i>MCM5</i>     | 2  | 0.000221306 |
| <i>APOBEC3H</i> | 14 | 0.0000634   |
| <i>TSPO</i>     | 0  | 0.0000625   |
| <i>TTLL12</i>   | 1  | 0.000204358 |
| <i>CBX7</i>     | 1  | 0.000257258 |
| <i>ZMAT5</i>    | 0  | 0.000254114 |
| <i>RBFOX2</i>   | 7  | 0.000229331 |
| <i>SYNGR1</i>   | 1  | 0.0000265   |
| <i>ASCC2</i>    | 4  | 0.000213931 |
| <i>APOL1</i>    | 5  | 0.000111038 |
| <i>MYH9</i>     | 1  | 0.000164816 |
| <i>CACNA1I</i>  | 1  | 0.000043    |
| <i>TXN2</i>     | 1  | 0.0000286   |
| <i>TNRC6B</i>   | 2  | 0.000304791 |
| <i>SGSM3</i>    | 2  | 0.000138004 |
| <i>IFT27</i>    | 2  | 0.000300776 |
| <i>KIAA0930</i> | 1  | 0.000206787 |
| <i>NCF4</i>     | 1  | 0.000154704 |
| <i>CSF2RB</i>   | 1  | 0.000176776 |
| <i>SLC25A17</i> | 2  | 0.000374101 |
| <i>KCTD17</i>   | 3  | 0.000101055 |
| <i>ST13</i>     | 4  | 0.000124679 |
| <i>CHADL</i>    | 7  | 0.000147709 |
| <i>PHF5A</i>    | 3  | 0.000168767 |
| <i>POLR3H</i>   | 2  | 0.000251017 |
| <i>PMM1</i>     | 1  | 0.000173861 |
| <i>DESI1</i>    | 2  | 0.000227301 |
| <i>BRD1</i>     | 2  | 0.000358999 |
| <i>MLC1</i>     | 3  | 0.0000445   |
| <i>HDAC10</i>   | 1  | 0.000117648 |
| <i>KCNK10</i>   | 7  | 0.0003168   |
| <i>ABHD4</i>    | 1  | 0.000182336 |

|                |    |             |
|----------------|----|-------------|
| <i>KHNYN</i>   | 0  | 0.000344646 |
| <i>CTSG</i>    | 10 | 0.00018894  |
| <i>GZMH</i>    | 3  | 0.0000686   |
| <i>GZMB</i>    | 3  | 0.0000419   |
| <i>RBM23</i>   | 0  | 0.00030023  |
| <i>PRMT5</i>   | 0  | 0.000125333 |
| <i>AP4S1</i>   | 3  | 0.000292584 |
| <i>POLE2</i>   | 14 | 0.000128125 |
| <i>VCPKMT</i>  | 0  | 0.000189412 |
| <i>SOS2</i>    | 0  | 0.000172909 |
| <i>NIN</i>     | 0  | 0.000328063 |
| <i>PYGL</i>    | 0  | 0.000147441 |
| <i>CDKN3</i>   | 14 | 0.0000817   |
| <i>CGRRF1</i>  | 3  | 0.000183565 |
| <i>PLEK2</i>   | 4  | 0.0000875   |
| <i>VTI1B</i>   | 4  | 0.00020332  |
| <i>TIMM9</i>   | 3  | 0.0000925   |
| <i>DAAM1</i>   | 3  | 0.000286758 |
| <i>SPTLC2</i>  | 0  | 0.000272672 |
| <i>LGMN</i>    | 7  | 0.0000344   |
| <i>ITPK1</i>   | 1  | 0.000189814 |
| <i>DHRS7</i>   | 0  | 0.000232107 |
| <i>ASB2</i>    | 20 | 0.0000673   |
| <i>CEP128</i>  | 3  | 0.000169064 |
| <i>HIF1A</i>   | 0  | 0.000186275 |
| <i>SLC10A1</i> | 7  | 0.000226449 |
| <i>SLC8A3</i>  | 7  | 0.000240332 |
| <i>DICER1</i>  | 0  | 0.000267242 |
| <i>ZFYVE21</i> | 0  | 0.00021315  |
| <i>TCL1A</i>   | 11 | 0.0000357   |
| <i>TELO2</i>   | 1  | 0.000141575 |
| <i>PCNX1</i>   | 0  | 0.000229882 |
| <i>PAPLN</i>   | 7  | 0.000270424 |

|                 |    |             |
|-----------------|----|-------------|
| <i>PSMB5</i>    | 3  | 0.000356379 |
| <i>YY1</i>      | 0  | 0.000463792 |
| <i>CCNB1IP1</i> | 3  | 0.000247372 |
| <i>APEX1</i>    | 3  | 0.000206954 |
| <i>CHD8</i>     | 2  | 0.000361661 |
| <i>PCK2</i>     | 1  | 0.000141744 |
| <i>PRORP</i>    | 3  | 0.0000799   |
| <i>NFKBIA</i>   | 0  | 0.000165854 |
| <i>EMC9</i>     | 3  | 0.0000976   |
| <i>PSME2</i>    | 5  | 0.0000886   |
| <i>TM9SF1</i>   | 0  | 0.000244426 |
| <i>GMPR2</i>    | 0  | 0.000335654 |
| <i>RABGGTA</i>  | 1  | 0.000130206 |
| <i>PLTP</i>     | 7  | 0.000146586 |
| <i>TRPC4AP</i>  | 0  | 0.000456952 |
| <i>PYGB</i>     | 0  | 0.0000968   |
| <i>ABHD12</i>   | 2  | 0.000267017 |
| <i>CD40</i>     | 11 | 0.0000883   |
| <i>UQCC1</i>    | 2  | 0.000304375 |
| <i>ZMYND8</i>   | 2  | 0.000302679 |
| <i>IFT52</i>    | 3  | 0.000201587 |
| <i>NDRG3</i>    | 0  | 0.000266089 |
| <i>RAB5IF</i>   | 0  | 0.000163267 |
| <i>TPD52L2</i>  | 0  | 0.000273162 |
| <i>TUBB1</i>    | 4  | 0.000296501 |
| <i>MTG2</i>     | 1  | 0.000218658 |
| <i>MRGBP</i>    | 3  | 0.000294987 |
| <i>TCFL5</i>    | 3  | 0.000137325 |
| <i>SLC17A9</i>  | 1  | 0.0000648   |
| <i>BIRC7</i>    | 7  | 0.0000615   |
| <i>ARFGAP1</i>  | 1  | 0.000270424 |
| <i>RNF24</i>    | 1  | 0.000126903 |
| <i>ARFRP1</i>   | 2  | 0.000325928 |

|                |    |             |
|----------------|----|-------------|
| <i>RASSF2</i>  | 0  | 0.000235393 |
| <i>CDS2</i>    | 0  | 0.0002245   |
| <i>SNPH</i>    | 2  | 0.0000568   |
| <i>SIRPB1</i>  | 1  | 0.000129971 |
| <i>MYL9</i>    | 4  | 0.0000392   |
| <i>HCK</i>     | 0  | 0.000183345 |
| <i>TLDC2</i>   | 7  | 0.000186393 |
| <i>NOP56</i>   | 3  | 0.00030452  |
| <i>MANBAL</i>  | 2  | 0.000314406 |
| <i>MAPRE1</i>  | 0  | 0.000344364 |
| <i>OXT</i>     | 7  | 0.0000783   |
| <i>CHMP4B</i>  | 0  | 0.0000714   |
| <i>BPI</i>     | 10 | 0.000225835 |
| <i>CST3</i>    | 1  | 0.000027    |
| <i>ASIP</i>    | 7  | 0.0000796   |
| <i>AHCY</i>    | 1  | 0.0000804   |
| <i>DNTTIP1</i> | 0  | 0.000181577 |
| <i>PIGU</i>    | 2  | 0.00031534  |
| <i>APMAP</i>   | 0  | 0.000137202 |
| <i>ZNF516</i>  | 1  | 0.000206812 |
| <i>RBFA</i>    | 2  | 0.000296913 |
| <i>LPIN2</i>   | 1  | 0.000154248 |
| <i>CEP76</i>   | 3  | 0.000308908 |
| <i>SMAD7</i>   | 3  | 0.000107299 |
| <i>POLI</i>    | 3  | 0.000192723 |
| <i>RIOK3</i>   | 4  | 0.000200603 |
| <i>CSTF2</i>   | 3  | 0.000310557 |
| <i>VSIG1</i>   | 3  | 0.000122188 |
| <i>STS</i>     | 0  | 0.0000567   |
| <i>PGRMC1</i>  | 4  | 0.000178371 |
| <i>POLA1</i>   | 3  | 0.000288716 |
| <i>MID1</i>    | 7  | 0.000216917 |
| <i>ALG13</i>   | 2  | 0.000241464 |

|                |    |             |
|----------------|----|-------------|
| <i>TLR8</i>    | 0  | 0.000171252 |
| <i>AMMECR1</i> | 3  | 0.000334199 |
| <i>WDR13</i>   | 0  | 0.00018078  |
| <i>SRPX</i>    | 7  | 0.000157753 |
| <i>STAG2</i>   | 0  | 0.000191445 |
| <i>ABCD1</i>   | 1  | 0.00017509  |
| <i>CCDC22</i>  | 3  | 0.000187025 |
| <i>CACNA1F</i> | 7  | 0.000097    |
| <i>SYP</i>     | 7  | 0.0000259   |
| <i>PLP2</i>    | 0  | 0.0000236   |
| <i>BMX</i>     | 0  | 0.000024    |
| <i>PLS3</i>    | 7  | 0.0000275   |
| <i>NAA10</i>   | 1  | 0.0000998   |
| <i>RENBP</i>   | 1  | 0.00015227  |
| <i>SMARCA1</i> | 7  | 0.000039    |
| <i>MTMR8</i>   | 2  | 0.000266987 |
| <i>ZC3H12B</i> | 2  | 0.0000257   |
| <i>KCND1</i>   | 1  | 0.0000316   |
| <i>PIM2</i>    | 1  | 0.000153653 |
| <i>SCML2</i>   | 2  | 0.0000366   |
| <i>PQBP1</i>   | 3  | 0.000294277 |
| <i>GATA1</i>   | 4  | 0.000172412 |
| <i>SMS</i>     | 0  | 0.000250446 |
| <i>CD99L2</i>  | 2  | 0.000336835 |
| <i>RP2</i>     | 0  | 0.000207367 |
| <i>JADE3</i>   | 11 | 0.0000764   |
| <i>CDK16</i>   | 1  | 0.000118083 |
| <i>USP11</i>   | 2  | 0.000176499 |
| <i>PCYT1B</i>  | 4  | 0.000109186 |
| <i>CD40LG</i>  | 3  | 0.00011325  |
| <i>PIN4</i>    | 3  | 0.000204921 |
| <i>KLF8</i>    | 11 | 0.0000507   |
| <i>SYTL4</i>   | 4  | 0.00010914  |

|                 |    |             |
|-----------------|----|-------------|
| <i>ZDHHC15</i>  | 7  | 0.0000957   |
| <i>CENPI</i>    | 14 | 0.0000306   |
| <i>DRP2</i>     | 7  | 0.000170417 |
| <i>GLA</i>      | 0  | 0.000157276 |
| <i>BEX4</i>     | 3  | 0.000144437 |
| <i>RUBCNL</i>   | 0  | 0.0000247   |
| <i>FGF14</i>    | 7  | 0.000297104 |
| <i>HTR2A</i>    | 7  | 0.000255968 |
| <i>TNFSF13B</i> | 0  | 0.0000752   |
| <i>MLNR</i>     | 7  | 0.000226609 |
| <i>CAB39L</i>   | 3  | 0.000187845 |
| <i>DNAJC3</i>   | 0  | 0.000202554 |
| <i>UGGT2</i>    | 3  | 0.0000292   |
| <i>ARHGEF7</i>  | 2  | 0.000330713 |
| <i>SLC25A15</i> | 3  | 0.000287379 |
| <i>RGCC</i>     | 4  | 0.0000335   |
| <i>VWA8</i>     | 2  | 0.000326904 |
| <i>KATNAL1</i>  | 3  | 0.0001797   |
| <i>DHRS12</i>   | 0  | 0.0000402   |
| <i>MEDAG</i>    | 7  | 0.00028476  |
| <i>TSC22D1</i>  | 2  | 0.0000747   |
| <i>OLFM4</i>    | 10 | 0.000102428 |
| <i>ZNF629</i>   | 2  | 0.0000579   |
| <i>CORO1A</i>   | 1  | 0.000215256 |
| <i>MAPK3</i>    | 0  | 0.0000852   |
| <i>LYRM1</i>    | 0  | 0.000306473 |
| <i>NUTF2</i>    | 3  | 0.000230792 |
| <i>TSNAXIP1</i> | 7  | 0.0000526   |
| <i>NFAT5</i>    | 2  | 0.000178159 |
| <i>LONP2</i>    | 3  | 0.000354892 |
| <i>N4BP1</i>    | 0  | 0.000293954 |
| <i>PLL</i>      | 7  | 0.000144724 |
| <i>DHODH</i>    | 2  | 0.000278304 |

|                 |    |             |
|-----------------|----|-------------|
| <i>ACD</i>      | 1  | 0.000134222 |
| <i>ZNF821</i>   | 2  | 0.000118328 |
| <i>SETD6</i>    | 3  | 0.000338482 |
| <i>SMPD3</i>    | 13 | 0.000165437 |
| <i>SLC7A6</i>   | 2  | 0.000234266 |
| <i>PLA2G15</i>  | 1  | 0.0000953   |
| <i>FA2H</i>     | 7  | 0.000278684 |
| <i>WDR59</i>    | 2  | 0.00032051  |
| <i>MLYCD</i>    | 2  | 0.00029523  |
| <i>SEC14L5</i>  | 4  | 0.0000334   |
| <i>USP10</i>    | 0  | 0.000183699 |
| <i>CRISPLD2</i> | 1  | 0.0000333   |
| <i>ABCC1</i>    | 1  | 0.00019764  |
| <i>NOMO3</i>    | 1  | 0.0000389   |
| <i>MTHFSD</i>   | 2  | 0.000402264 |
| <i>HAGHL</i>    | 2  | 0.0000905   |
| <i>SLC7A5</i>   | 4  | 0.0000679   |
| <i>METRNL</i>   | 2  | 0.0000614   |
| <i>MEFV</i>     | 1  | 0.000173918 |
| <i>CRYM</i>     | 7  | 0.0000753   |
| <i>PIEZO1</i>   | 1  | 0.000156504 |
| <i>GSPT1</i>    | 4  | 0.000179104 |
| <i>ZNF174</i>   | 3  | 0.000361642 |
| <i>CLUAP1</i>   | 3  | 0.000181569 |
| <i>PRSS33</i>   | 13 | 0.000146081 |
| <i>ELOB</i>     | 4  | 0.000058    |
| <i>CPPED1</i>   | 0  | 0.000155676 |
| <i>USP31</i>    | 2  | 0.000250582 |
| <i>XYLT1</i>    | 1  | 0.000230462 |
| <i>PYCARD</i>   | 0  | 0.00013649  |
| <i>STX4</i>     | 0  | 0.000249196 |
| <i>BCKDK</i>    | 1  | 0.000218132 |
| <i>NOMO1</i>    | 2  | 0.00015455  |

|                  |    |             |
|------------------|----|-------------|
| <i>TMC5</i>      | 21 | 0.000139022 |
| <i>RNF40</i>     | 1  | 0.000276883 |
| <i>AQP9</i>      | 0  | 0.000143545 |
| <i>CORO2B</i>    | 7  | 0.0000262   |
| <i>TRIP4</i>     | 2  | 0.000366958 |
| <i>MTFMT</i>     | 0  | 0.000318932 |
| <i>ACSBG1</i>    | 7  | 0.0000814   |
| <i>HOMER2</i>    | 2  | 0.0000301   |
| <i>ZNF106</i>    | 0  | 0.0003041   |
| <i>DMXL2</i>     | 0  | 0.000169249 |
| <i>VPS18</i>     | 0  | 0.000269177 |
| <i>CSPP1</i>     | 3  | 0.000281295 |
| <i>ZDHHC2</i>    | 3  | 0.0000672   |
| <i>NBN</i>       | 0  | 0.000180228 |
| <i>CPQ</i>       | 0  | 0.000235528 |
| <i>IMPAD1</i>    | 3  | 0.000379279 |
| <i>NIPAL2</i>    | 3  | 0.0000238   |
| <i>IKBKB</i>     | 2  | 0.0002996   |
| <i>GDAP1</i>     | 3  | 0.000179619 |
| <i>IL7</i>       | 11 | 0.000041    |
| <i>TRPS1</i>     | 0  | 0.000287985 |
| <i>SPAG1</i>     | 0  | 0.0000249   |
| <i>TSTA3</i>     | 4  | 0.0000274   |
| <i>EEF1D</i>     | 3  | 0.000162895 |
| <i>SQLE</i>      | 3  | 0.0000519   |
| <i>SLC39A14</i>  | 2  | 0.0000394   |
| <i>GSR</i>       | 0  | 0.000287319 |
| <i>TNFRSF10A</i> | 3  | 0.000271719 |
| <i>ERICH1</i>    | 0  | 0.0000405   |
| <i>ASAH1</i>     | 0  | 0.00018825  |
| <i>BNIP3L</i>    | 4  | 0.000153521 |
| <i>MAN2B1</i>    | 1  | 0.000203812 |
| <i>KCNN4</i>     | 1  | 0.0000246   |

|                 |    |             |
|-----------------|----|-------------|
| <i>NUCB1</i>    | 1  | 0.0000877   |
| <i>DHDH</i>     | 7  | 0.000146216 |
| <i>ECH1</i>     | 1  | 0.0000795   |
| <i>NFKB1B</i>   | 0  | 0.000199148 |
| <i>SARS2</i>    | 2  | 0.0000248   |
| <i>RELB</i>     | 1  | 0.000057    |
| <i>CLASRP</i>   | 1  | 0.000219638 |
| <i>FCGRT</i>    | 0  | 0.000171751 |
| <i>ARHGEF18</i> | 1  | 0.000132089 |
| <i>PPP1R13L</i> | 7  | 0.000172885 |
| <i>ERCC2</i>    | 1  | 0.000117274 |
| <i>KLC3</i>     | 4  | 0.0000262   |
| <i>SF3A2</i>    | 1  | 0.000204716 |
| <i>AMH</i>      | 7  | 0.0000369   |
| <i>LYL1</i>     | 4  | 0.000124469 |
| <i>OAZ1</i>     | 4  | 0.000195776 |
| <i>STX10</i>    | 0  | 0.000200248 |
| <i>FCER2</i>    | 11 | 0.0000339   |
| <i>TLE6</i>     | 7  | 0.000297042 |
| <i>PTOV1</i>    | 1  | 0.000120535 |
| <i>TLE5</i>     | 1  | 0.0000489   |
| <i>MED25</i>    | 1  | 0.000149903 |
| <i>LILRA1</i>   | 1  | 0.000188054 |
| <i>SNAPC2</i>   | 1  | 0.0000276   |
| <i>C19orf53</i> | 3  | 0.000121258 |
| <i>TIMM44</i>   | 3  | 0.000233545 |
| <i>IL27RA</i>   | 3  | 0.000189537 |
| <i>ASF1B</i>    | 1  | 0.000053    |
| <i>C19orf44</i> | 7  | 0.0000372   |
| <i>OLFM2</i>    | 2  | 0.0000251   |
| <i>RPS16</i>    | 3  | 0.0000345   |
| <i>FBL</i>      | 3  | 0.000145548 |
| <i>CLC</i>      | 22 | 0.000154847 |

|                 |    |             |
|-----------------|----|-------------|
| <i>PLD3</i>     | 1  | 0.0000934   |
| <i>PIAS4</i>    | 1  | 0.000156458 |
| <i>NUMBL</i>    | 1  | 0.000175519 |
| <i>SHD</i>      | 7  | 0.000161572 |
| <i>POLR2I</i>   | 3  | 0.0000743   |
| <i>SLC1A5</i>   | 4  | 0.000144913 |
| <i>TJP3</i>     | 2  | 0.0000448   |
| <i>CCDC9</i>    | 1  | 0.000100504 |
| <i>HNRNPUL1</i> | 1  | 0.000276774 |
| <i>FZR1</i>     | 1  | 0.00011472  |
| <i>BBC3</i>     | 0  | 0.0000672   |
| <i>CEACAM4</i>  | 1  | 0.0000941   |
| <i>PLIN3</i>    | 0  | 0.000146187 |
| <i>SIGLEC8</i>  | 13 | 0.000243751 |
| <i>CD79A</i>    | 11 | 0.0000761   |
| <i>ICAM4</i>    | 4  | 0.0000343   |
| <i>NKG7</i>     | 3  | 0.0000698   |
| <i>CD33</i>     | 1  | 0.0000697   |
| <i>BABAM1</i>   | 4  | 0.000166279 |
| <i>TYK2</i>     | 1  | 0.000303448 |
| <i>CDC37</i>    | 3  | 0.000239741 |
| <i>NAPA</i>     | 1  | 0.0000459   |
| <i>RABAC1</i>   | 3  | 0.0000385   |
| <i>PTPRS</i>    | 7  | 0.0000318   |
| <i>CNFN</i>     | 7  | 0.0000658   |
| <i>CYTH2</i>    | 1  | 0.000296369 |
| <i>GRWD1</i>    | 2  | 0.000169891 |
| <i>GRIN2D</i>   | 7  | 0.000242265 |
| <i>CCDC114</i>  | 7  | 0.000276028 |
| <i>LIG1</i>     | 2  | 0.000154637 |
| <i>SIGLEC5</i>  | 1  | 0.0000237   |
| <i>RAB3D</i>    | 1  | 0.000180711 |
| <i>TMEM205</i>  | 3  | 0.000184308 |

|                |    |             |
|----------------|----|-------------|
| <i>PLPPR2</i>  | 1  | 0.000148692 |
| <i>LILRB5</i>  | 7  | 0.000112016 |
| <i>KLF1</i>    | 4  | 0.0000903   |
| <i>PRPF31</i>  | 3  | 0.00025916  |
| <i>TFPT</i>    | 3  | 0.000199031 |
| <i>RPL18A</i>  | 3  | 0.0000831   |
| <i>ELL</i>     | 1  | 0.000204826 |
| <i>UPK1A</i>   | 7  | 0.0000246   |
| <i>ETV2</i>    | 7  | 0.00008     |
| <i>HAMP</i>    | 7  | 0.0000447   |
| <i>LSR</i>     | 2  | 0.0000341   |
| <i>FKBP8</i>   | 4  | 0.000166342 |
| <i>HPN</i>     | 7  | 0.000282731 |
| <i>PBX4</i>    | 1  | 0.0000636   |
| <i>ERF</i>     | 1  | 0.000156153 |
| <i>ATP13A1</i> | 1  | 0.000212286 |
| <i>ZNF574</i>  | 1  | 0.0000969   |
| <i>ZNF85</i>   | 3  | 0.000155516 |
| <i>ETHE1</i>   | 3  | 0.000166229 |
| <i>RUNDC3B</i> | 7  | 0.0000916   |
| <i>CFAP69</i>  | 7  | 0.000324111 |
| <i>CDK6</i>    | 3  | 0.000227335 |
| <i>NAMPT</i>   | 0  | 0.000134504 |
| <i>PIK3CG</i>  | 0  | 0.000327637 |
| <i>ITGB8</i>   | 23 | 0.000207865 |
| <i>HBP1</i>    | 0  | 0.000257711 |
| <i>DUS4L</i>   | 3  | 0.000287754 |
| <i>MTPN</i>    | 0  | 0.000199174 |
| <i>ZC3HAV1</i> | 0  | 0.0000912   |
| <i>ADAP1</i>   | 1  | 0.0000936   |
| <i>CAV1</i>    | 7  | 0.000125359 |
| <i>DNAJB6</i>  | 0  | 0.00024342  |
| <i>HOXA6</i>   | 7  | 0.0000803   |

|                 |    |             |
|-----------------|----|-------------|
| <i>BRAT1</i>    | 1  | 0.000144645 |
| <i>IQCE</i>     | 1  | 0.000140434 |
| <i>VIPR2</i>    | 7  | 0.000152104 |
| <i>HIBADH</i>   | 3  | 0.000349087 |
| <i>TAX1BP1</i>  | 3  | 0.00018348  |
| <i>CPVL</i>     | 0  | 0.0000522   |
| <i>CHN2</i>     | 2  | 0.0000599   |
| <i>ABHD11</i>   | 0  | 0.0000658   |
| <i>CHCHD2</i>   | 3  | 0.000193166 |
| <i>CCL24</i>    | 7  | 0.0000535   |
| <i>EIF3B</i>    | 4  | 0.000124839 |
| <i>SNX8</i>     | 1  | 0.0000594   |
| <i>NUDT1</i>    | 3  | 0.0000578   |
| <i>TFR2</i>     | 4  | 0.0000535   |
| <i>FSCN3</i>    | 7  | 0.0000315   |
| <i>MOSPD3</i>   | 1  | 0.0000294   |
| <i>PCOLCE</i>   | 7  | 0.000152566 |
| <i>FBXO24</i>   | 7  | 0.000100237 |
| <i>IMPDH1</i>   | 1  | 0.00021707  |
| <i>AGFG2</i>    | 2  | 0.000141158 |
| <i>SERPINE1</i> | 7  | 0.0000352   |
| <i>PLOD3</i>    | 1  | 0.000172108 |
| <i>CLDN15</i>   | 1  | 0.000190321 |
| <i>EZH2</i>     | 2  | 0.0000362   |
| <i>CEP41</i>    | 2  | 0.000128859 |
| <i>ZNF862</i>   | 2  | 0.000326991 |
| <i>TSPAN13</i>  | 11 | 0.0000311   |
| <i>TMEM176B</i> | 6  | 0.000154847 |
| <i>GLI3</i>     | 7  | 0.000323583 |
| <i>BLVRA</i>    | 3  | 0.0000863   |
| <i>AEBP1</i>    | 7  | 0.0000416   |
| <i>POLD2</i>    | 2  | 0.00016016  |
| <i>FSD1L</i>    | 3  | 0.0000946   |

|                |   |             |
|----------------|---|-------------|
| <i>TMEM245</i> | 2 | 0.000273437 |
| <i>MEGF9</i>   | 0 | 0.000154292 |
| <i>CORO2A</i>  | 2 | 0.000043    |
| <i>TGFBR1</i>  | 0 | 0.000229482 |
| <i>C5</i>      | 3 | 0.0000267   |
| <i>TLE4</i>    | 0 | 0.000333865 |
| <i>PTGR1</i>   | 7 | 0.000292158 |
| <i>SUSD1</i>   | 2 | 0.000133927 |
| <i>DNM1</i>    | 7 | 0.000293623 |
| <i>RLN1</i>    | 3 | 0.0000789   |
| <i>KDM4C</i>   | 2 | 0.000342587 |
| <i>TESK1</i>   | 1 | 0.000122666 |
| <i>DDX58</i>   | 5 | 0.000177179 |
| <i>PIP5K1B</i> | 2 | 0.0000313   |
| <i>GLIS3</i>   | 7 | 0.0000253   |
| <i>BAG1</i>    | 4 | 0.000212533 |
| <i>DNTT</i>    | 7 | 0.000245448 |
| <i>HPS1</i>    | 4 | 0.000101969 |
| <i>PHYH</i>    | 3 | 0.0000659   |
| <i>RASSF4</i>  | 1 | 0.000073    |
| <i>DNMBP</i>   | 2 | 0.0000318   |
| <i>CUBN</i>    | 2 | 0.0000964   |
| <i>TRDMT1</i>  | 2 | 0.000275394 |
| <i>ATE1</i>    | 3 | 0.000400298 |
| <i>PLEKHA1</i> | 3 | 0.000241996 |
| <i>PALD1</i>   | 7 | 0.000297493 |
| <i>UNC5B</i>   | 7 | 0.000265116 |
| <i>CDH23</i>   | 1 | 0.0000564   |
| <i>VSIR</i>    | 1 | 0.000242464 |
| <i>LIPA</i>    | 3 | 0.0000239   |
| <i>TWNK</i>    | 3 | 0.000254798 |
| <i>SFXN3</i>   | 2 | 0.00023556  |
| <i>FBXW4</i>   | 2 | 0.000305233 |

|                 |    |             |
|-----------------|----|-------------|
| <i>FGF8</i>     | 7  | 0.000266834 |
| <i>NPM3</i>     | 3  | 0.000156511 |
| <i>ARHGAP21</i> | 2  | 0.000163566 |
| <i>CUEDC2</i>   | 3  | 0.000270801 |
| <i>LHPP</i>     | 1  | 0.00015741  |
| <i>SH3PXD2A</i> | 2  | 0.0000269   |
| <i>CCNY</i>     | 0  | 0.000393776 |
| <i>UBE2S</i>    | 0  | 0.0000634   |
| <i>RPL28</i>    | 1  | 0.0000242   |
| <i>ZMIZ1</i>    | 1  | 0.00022373  |
| <i>PPIF</i>     | 1  | 0.000160847 |
| <i>PBLD</i>     | 0  | 0.0000305   |
| <i>TBC1D12</i>  | 3  | 0.0000243   |
| <i>FBXL20</i>   | 1  | 0.000248278 |
| <i>UBTF</i>     | 2  | 0.000350037 |
| <i>PSMD3</i>    | 3  | 0.00022649  |
| <i>RAPGEFL1</i> | 1  | 0.000046    |
| <i>RGS9</i>     | 3  | 0.000111517 |
| <i>RNF43</i>    | 7  | 0.0000302   |
| <i>WNT3</i>     | 11 | 0.0000662   |
| <i>P2RX1</i>    | 1  | 0.0000252   |
| <i>TUBD1</i>    | 3  | 0.000322863 |
| <i>KPNB1</i>    | 0  | 0.000267555 |
| <i>GOSR2</i>    | 2  | 0.000307955 |
| <i>PNPO</i>     | 2  | 0.000284605 |
| <i>CBX1</i>     | 0  | 0.000223774 |
| <i>GALK1</i>    | 0  | 0.000126469 |
| <i>ENO3</i>     | 3  | 0.0000984   |
| <i>PFN1</i>     | 1  | 0.000118247 |
| <i>RAI1</i>     | 1  | 0.000170152 |
| <i>NUP88</i>    | 3  | 0.00028105  |
| <i>C1QBP</i>    | 3  | 0.000258665 |
| <i>CPD</i>      | 0  | 0.00017402  |

|                 |    |             |
|-----------------|----|-------------|
| <i>GOSR1</i>    | 2  | 0.000369105 |
| <i>CCDC47</i>   | 0  | 0.000375357 |
| <i>SMARCD2</i>  | 0  | 0.000213193 |
| <i>ICAM2</i>    | 3  | 0.000184566 |
| <i>B9D1</i>     | 24 | 0.0000598   |
| <i>LGALS3BP</i> | 5  | 0.0000377   |
| <i>CCL2</i>     | 5  | 0.00011371  |
| <i>CCL8</i>     | 5  | 0.00010015  |
| <i>CCL1</i>     | 7  | 0.000155379 |
| <i>DHX58</i>    | 5  | 0.000209209 |
| <i>KAT2A</i>    | 1  | 0.000181448 |
| <i>HSD17B1</i>  | 7  | 0.000124391 |
| <i>EZH1</i>     | 0  | 0.000329303 |
| <i>PPP1R9B</i>  | 1  | 0.000168896 |
| <i>SGCA</i>     | 7  | 0.00024516  |
| <i>VAT1</i>     | 1  | 0.0000641   |
| <i>ALOX12</i>   | 4  | 0.000123355 |
| <i>HDAC5</i>    | 1  | 0.00022414  |
| <i>ABCC3</i>    | 4  | 0.0000677   |
| <i>DUSP3</i>    | 0  | 0.000114719 |
| <i>CACNG1</i>   | 7  | 0.000101131 |
| <i>SLC16A6</i>  | 0  | 0.00021246  |
| <i>PRKAR1A</i>  | 0  | 0.000210532 |
| <i>MMD</i>      | 4  | 0.000112791 |
| <i>DPH1</i>     | 1  | 0.000181899 |
| <i>MAP2K6</i>   | 0  | 0.000164228 |
| <i>SLC9A3R1</i> | 1  | 0.00018191  |
| <i>MYH3</i>     | 2  | 0.000140097 |
| <i>NAT9</i>     | 3  | 0.000307817 |
| <i>TMEM104</i>  | 1  | 0.000243938 |
| <i>TMEM97</i>   | 3  | 0.0000279   |
| <i>PMP22</i>    | 20 | 0.0000673   |
| <i>UNC119</i>   | 0  | 0.000225708 |

|                 |    |             |
|-----------------|----|-------------|
| <i>ALDOC</i>    | 1  | 0.0000238   |
| <i>PHF12</i>    | 1  | 0.000239116 |
| <i>USP46</i>    | 3  | 0.000131471 |
| <i>LAMTOR3</i>  | 0  | 0.000178182 |
| <i>ELF2</i>     | 0  | 0.000288055 |
| <i>NDUFC1</i>   | 3  | 0.000280437 |
| <i>TBC1D9</i>   | 2  | 0.0000357   |
| <i>INPP4B</i>   | 3  | 0.000155158 |
| <i>GAR1</i>     | 3  | 0.0000515   |
| <i>SLC2A9</i>   | 1  | 0.0000485   |
| <i>NEIL3</i>    | 14 | 0.000117589 |
| <i>BST1</i>     | 0  | 0.000185626 |
| <i>RAPGEF2</i>  | 0  | 0.00020714  |
| <i>SNX25</i>    | 3  | 0.000154505 |
| <i>KLHL5</i>    | 3  | 0.000204687 |
| <i>FAM149A</i>  | 7  | 0.000271504 |
| <i>NCAPG</i>    | 14 | 0.000181412 |
| <i>PPARGC1A</i> | 7  | 0.0000713   |
| <i>HTATIP2</i>  | 0  | 0.000236856 |
| <i>TECTA</i>    | 7  | 0.000136067 |
| <i>CRTAM</i>    | 3  | 0.0000246   |
| <i>B3GAT1</i>   | 3  | 0.000052    |
| <i>VWA5A</i>    | 3  | 0.0000848   |
| <i>SIAE</i>     | 2  | 0.0000299   |
| <i>SNX15</i>    | 1  | 0.0000904   |
| <i>DTX4</i>     | 1  | 0.0000236   |
| <i>EHD1</i>     | 1  | 0.000182887 |
| <i>PUS3</i>     | 3  | 0.000218331 |
| <i>NRXN2</i>    | 7  | 0.000303316 |
| <i>MS4A6A</i>   | 0  | 0.000100418 |
| <i>ST3GAL4</i>  | 1  | 0.0000759   |
| <i>CPT1A</i>    | 1  | 0.0000255   |
| <i>CCDC86</i>   | 1  | 0.0000515   |

|                 |    |             |
|-----------------|----|-------------|
| <i>HPX</i>      | 7  | 0.000224668 |
| <i>ANAPC15</i>  | 3  | 0.0000574   |
| <i>PANX1</i>    | 3  | 0.000188091 |
| <i>ARHGEF17</i> | 7  | 0.0000307   |
| <i>RNF141</i>   | 0  | 0.000176839 |
| <i>CEP126</i>   | 3  | 0.0000639   |
| <i>EIF4G2</i>   | 0  | 0.000315959 |
| <i>GALNT18</i>  | 7  | 0.000270747 |
| <i>UPK2</i>     | 7  | 0.000165067 |
| <i>NECTIN1</i>  | 1  | 0.0000455   |
| <i>HIPK3</i>    | 0  | 0.000224739 |
| <i>COMMD9</i>   | 3  | 0.000250755 |
| <i>SLC15A3</i>  | 0  | 0.000135112 |
| <i>CD5</i>      | 2  | 0.000047    |
| <i>SLC22A18</i> | 1  | 0.0000236   |
| <i>C11orf21</i> | 1  | 0.000123778 |
| <i>SOX6</i>     | 4  | 0.000054    |
| <i>NUP98</i>    | 0  | 0.000302886 |
| <i>CHKA</i>     | 2  | 0.0000968   |
| <i>EXPH5</i>    | 3  | 0.0000267   |
| <i>POU2AF1</i>  | 11 | 0.000177175 |
| <i>P3H3</i>     | 7  | 0.0000291   |
| <i>PPFIBP1</i>  | 2  | 0.0000912   |
| <i>CLEC2B</i>   | 0  | 0.0000775   |
| <i>SELPLG</i>   | 1  | 0.000161562 |
| <i>CORO1C</i>   | 0  | 0.000213208 |
| <i>ASIC1</i>    | 7  | 0.000293045 |
| <i>SLC11A2</i>  | 2  | 0.000331456 |
| <i>MVK</i>      | 2  | 0.000108806 |
| <i>CAMKK2</i>   | 1  | 0.000228758 |
| <i>BIN2</i>     | 0  | 0.000369069 |
| <i>IL23A</i>    | 3  | 0.0000871   |
| <i>ATP5F1B</i>  | 3  | 0.000185414 |

|                 |    |             |
|-----------------|----|-------------|
| <i>BCL7A</i>    | 11 | 0.000029    |
| <i>CYP27B1</i>  | 7  | 0.000252508 |
| <i>LIN7A</i>    | 0  | 0.000129194 |
| <i>ACSS3</i>    | 0  | 0.0000972   |
| <i>TNS2</i>     | 7  | 0.000326307 |
| <i>PPM1H</i>    | 1  | 0.000027    |
| <i>LTA4H</i>    | 0  | 0.0000441   |
| <i>WNT5B</i>    | 7  | 0.0000271   |
| <i>ITFG2</i>    | 2  | 0.000309657 |
| <i>FOXM1</i>    | 7  | 0.000140804 |
| <i>PRR4</i>     | 2  | 0.0000257   |
| <i>PARP11</i>   | 3  | 0.000252791 |
| <i>ARPC3</i>    | 0  | 0.00015882  |
| <i>GPN3</i>     | 3  | 0.0001429   |
| <i>MYL2</i>     | 7  | 0.000254597 |
| <i>RAD51AP1</i> | 14 | 0.0000724   |
| <i>CUX2</i>     | 7  | 0.000317873 |
| <i>MANSC1</i>   | 0  | 0.0000328   |
| <i>DUSP16</i>   | 2  | 0.000149624 |
| <i>ALDH2</i>    | 1  | 0.0000315   |
| <i>CDKN1B</i>   | 0  | 0.000305795 |
| <i>LTBR</i>     | 1  | 0.000145815 |
| <i>OGFOD2</i>   | 0  | 0.000106613 |
| <i>CDK2AP1</i>  | 0  | 0.0000271   |
| <i>OAS3</i>     | 5  | 0.000174972 |
| <i>OAS2</i>     | 5  | 0.000197275 |
| <i>ART4</i>     | 21 | 0.0000605   |
| <i>MGP</i>      | 7  | 0.0000963   |
| <i>RASAL1</i>   | 7  | 0.000326921 |
| <i>ARHGDIB</i>  | 0  | 0.000239462 |
| <i>VDR</i>      | 1  | 0.000161921 |
| <i>STX2</i>     | 2  | 0.0000358   |
| <i>TBC1D30</i>  | 0  | 0.0000254   |

|                  |   |             |
|------------------|---|-------------|
| <i>RAB5B</i>     | 1 | 0.000158785 |
| <i>MDM1</i>      | 3 | 0.000282359 |
| <i>GAPDH</i>     | 0 | 0.000111816 |
| <i>NOP2</i>      | 2 | 0.000107752 |
| <i>CHD4</i>      | 2 | 0.000302395 |
| <i>ACRBP</i>     | 4 | 0.0000636   |
| <i>UHRF1BP1L</i> | 0 | 0.000226593 |
| <i>GNB3</i>      | 7 | 0.000165631 |
| <i>CDCA3</i>     | 7 | 0.000066    |
| <i>CHPT1</i>     | 4 | 0.0000487   |
| <i>GNPTAB</i>    | 3 | 0.000268148 |
| <i>ATN1</i>      | 1 | 0.0000919   |
| <i>C12orf57</i>  | 3 | 0.000067    |
| <i>LPCAT3</i>    | 1 | 0.000201893 |
| <i>NT5DC3</i>    | 2 | 0.0000247   |
| <i>NANOG</i>     | 7 | 0.000274001 |
| <i>LDHB</i>      | 3 | 0.000103262 |
| <i>AICDA</i>     | 7 | 0.000210253 |
| <i>RAB35</i>     | 0 | 0.000317234 |
| <i>PHC1</i>      | 2 | 0.000206395 |
| <i>COX6A1</i>    | 3 | 0.000102376 |
| <i>TDP2</i>      | 0 | 0.000201634 |
| <i>DSE</i>       | 0 | 0.000151767 |
| <i>MAK</i>       | 0 | 0.000028    |
| <i>TMEM14C</i>   | 3 | 0.0000845   |
| <i>GCNT2</i>     | 2 | 0.0000239   |
| <i>NEDD9</i>     | 0 | 0.000200061 |
| <i>FAM184A</i>   | 3 | 0.0000454   |
| <i>MAN1A1</i>    | 0 | 0.0000826   |
| <i>SERINC1</i>   | 0 | 0.000155288 |
| <i>UST</i>       | 2 | 0.0000378   |
| <i>RHAG</i>      | 4 | 0.0000709   |
| <i>KCTD20</i>    | 0 | 0.000340166 |

|                 |    |             |
|-----------------|----|-------------|
| <i>SOD2</i>     | 0  | 0.000132369 |
| <i>MCM3</i>     | 3  | 0.000140118 |
| <i>FBXO9</i>    | 4  | 0.000135973 |
| <i>CD83</i>     | 3  | 0.0000849   |
| <i>MDN1</i>     | 2  | 0.000252826 |
| <i>BACH2</i>    | 2  | 0.00011202  |
| <i>TREML2</i>   | 0  | 0.000131823 |
| <i>TSPO2</i>    | 4  | 0.0000679   |
| <i>KHDRBS2</i>  | 11 | 0.000158044 |
| <i>FBXL4</i>    | 2  | 0.000277617 |
| <i>PRDM13</i>   | 7  | 0.00021446  |
| <i>E2F3</i>     | 0  | 0.00024772  |
| <i>PTP4A1</i>   | 0  | 0.0000271   |
| <i>ALDH5A1</i>  | 4  | 0.000049    |
| <i>VNN2</i>     | 0  | 0.0000576   |
| <i>RPS12</i>    | 3  | 0.0000577   |
| <i>C6orf62</i>  | 0  | 0.000321303 |
| <i>SOBP</i>     | 7  | 0.00013212  |
| <i>SNX3</i>     | 4  | 0.000261342 |
| <i>SLC16A10</i> | 3  | 0.0000711   |
| <i>ADGRG6</i>   | 7  | 0.0000591   |
| <i>PHACTR2</i>  | 2  | 0.000230786 |
| <i>EPM2A</i>    | 2  | 0.000203252 |
| <i>SLC39A7</i>  | 0  | 0.000263558 |
| <i>CCR6</i>     | 2  | 0.0000343   |
| <i>CUTA</i>     | 3  | 0.000142156 |
| <i>PACRG</i>    | 7  | 0.000206469 |
| <i>TFEB</i>     | 1  | 0.000239258 |
| <i>CCND3</i>    | 1  | 0.000103403 |
| <i>BYSL</i>     | 3  | 0.0000721   |
| <i>TBP</i>      | 2  | 0.00035341  |
| <i>GUCA1B</i>   | 2  | 0.0000292   |
| <i>BICRAL</i>   | 2  | 0.000255143 |

|                |    |             |
|----------------|----|-------------|
| <i>PTK7</i>    | 7  | 0.0000281   |
| <i>DNPH1</i>   | 3  | 0.0000955   |
| <i>DUSP22</i>  | 0  | 0.000351304 |
| <i>GMDS</i>    | 2  | 0.000193186 |
| <i>TTK</i>     | 14 | 0.000185415 |
| <i>SLC29A1</i> | 13 | 0.000202484 |
| <i>CLIC5</i>   | 2  | 0.000027    |
| <i>ENPP5</i>   | 3  | 0.0000748   |
| <i>LY86</i>    | 3  | 0.0000735   |
| <i>TENT4A</i>  | 2  | 0.000264946 |
| <i>DAP</i>     | 1  | 0.000123146 |
| <i>GZMK</i>    | 3  | 0.0000238   |
| <i>APBB3</i>   | 1  | 0.000220828 |
| <i>SPARC</i>   | 4  | 0.000188181 |
| <i>IK</i>      | 0  | 0.000220652 |
| <i>HMGCR</i>   | 0  | 0.000253579 |
| <i>PCDHB3</i>  | 7  | 0.00025084  |
| <i>PDE8B</i>   | 7  | 0.000191114 |
| <i>PCDHB15</i> | 7  | 0.00027543  |
| <i>HAVCR1</i>  | 2  | 0.0000614   |
| <i>ITK</i>     | 3  | 0.000262404 |
| <i>RNF130</i>  | 0  | 0.000243305 |
| <i>BTNL8</i>   | 0  | 0.000038    |
| <i>TTC1</i>    | 3  | 0.000329403 |
| <i>MSH3</i>    | 2  | 0.000245739 |
| <i>RASGRF2</i> | 2  | 0.000163029 |
| <i>DROSHA</i>  | 2  | 0.000290293 |
| <i>LMNB1</i>   | 0  | 0.0000825   |
| <i>ARRDC3</i>  | 0  | 0.0000943   |
| <i>NPR3</i>    | 7  | 0.000243373 |
| <i>SLC27A6</i> | 7  | 0.000270298 |
| <i>IL4</i>     | 23 | 0.0000676   |
| <i>RAD50</i>   | 2  | 0.000258551 |

|                 |    |             |
|-----------------|----|-------------|
| <i>ST8SIA4</i>  | 0  | 0.00019314  |
| <i>GNPDA1</i>   | 3  | 0.000289103 |
| <i>SEC24A</i>   | 3  | 0.000257966 |
| <i>ERGIC1</i>   | 1  | 0.000176296 |
| <i>CPEB4</i>    | 0  | 0.000175182 |
| <i>HRH2</i>     | 1  | 0.0001156   |
| <i>EHHADH</i>   | 17 | 0.000154847 |
| <i>SELENOK</i>  | 4  | 0.0000645   |
| <i>BCL6</i>     | 1  | 0.000102979 |
| <i>ARL6</i>     | 3  | 0.000161026 |
| <i>CD86</i>     | 0  | 0.0000906   |
| <i>KPNA1</i>    | 0  | 0.000354371 |
| <i>SLC25A36</i> | 3  | 0.000189811 |
| <i>GRK7</i>     | 7  | 0.000265312 |
| <i>KAT2B</i>    | 4  | 0.000122631 |
| <i>SERPINI2</i> | 0  | 0.0000401   |
| <i>PFKFB4</i>   | 1  | 0.000215651 |
| <i>USP4</i>     | 0  | 0.000285568 |
| <i>ACAP2</i>    | 0  | 0.000265381 |
| <i>ECT2</i>     | 3  | 0.0000605   |
| <i>GNAI2</i>    | 1  | 0.000266144 |
| <i>USP9Y</i>    | 12 | 0.00016609  |
| <i>HYAL1</i>    | 7  | 0.000146827 |
| <i>TUSC2</i>    | 0  | 0.000229539 |
| <i>NPRL2</i>    | 3  | 0.000320592 |
| <i>CYB561D2</i> | 3  | 0.000363061 |
| <i>HHLA2</i>    | 7  | 0.000154901 |
| <i>C3orf52</i>  | 7  | 0.0000921   |
| <i>FRMD4B</i>   | 0  | 0.00010395  |
| <i>SLC41A3</i>  | 2  | 0.000224006 |
| <i>ATP6V1A</i>  | 0  | 0.000233261 |
| <i>KIAA1257</i> | 1  | 0.000103305 |
| <i>NEK11</i>    | 3  | 0.0000268   |

|                |    |             |
|----------------|----|-------------|
| <i>CISH</i>    | 1  | 0.0000358   |
| <i>ACVR2B</i>  | 2  | 0.00010547  |
| <i>ABCC5</i>   | 0  | 0.0000883   |
| <i>ABHD14B</i> | 1  | 0.00013212  |
| <i>EIF1B</i>   | 4  | 0.0000775   |
| <i>PLCH1</i>   | 7  | 0.0000491   |
| <i>VIPR1</i>   | 1  | 0.0000908   |
| <i>ZBTB47</i>  | 0  | 0.0000698   |
| <i>FOXP1</i>   | 2  | 0.000301159 |
| <i>KANSL3</i>  | 2  | 0.000249777 |
| <i>IL1A</i>    | 7  | 0.000134689 |
| <i>FAHD2A</i>  | 2  | 0.000323665 |
| <i>EPB41L5</i> | 3  | 0.000176557 |
| <i>DNAJC27</i> | 2  | 0.000315218 |
| <i>OTOF</i>    | 5  | 0.0000852   |
| <i>CENPA</i>   | 14 | 0.0000605   |
| <i>ACVR1</i>   | 2  | 0.000237112 |
| <i>ITGA4</i>   | 3  | 0.000210328 |
| <i>PPM1G</i>   | 3  | 0.000102912 |
| <i>PCSK4</i>   | 7  | 0.000244725 |
| <i>IFIH1</i>   | 5  | 0.000198296 |
| <i>RPS15</i>   | 3  | 0.000031    |
| <i>GCA</i>     | 0  | 0.000125958 |
| <i>INO80B</i>  | 3  | 0.0000339   |
| <i>PCGF1</i>   | 3  | 0.000167137 |
| <i>SPTBN1</i>  | 2  | 0.000204351 |
| <i>RTN4</i>    | 0  | 0.00022702  |
| <i>LOXL3</i>   | 1  | 0.0000539   |
| <i>DOK1</i>    | 0  | 0.000273673 |
| <i>GALNT3</i>  | 0  | 0.000180059 |
| <i>WDR75</i>   | 3  | 0.000337705 |
| <i>FANCL</i>   | 3  | 0.0000289   |
| <i>GGCX</i>    | 2  | 0.00032303  |

|               |    |             |
|---------------|----|-------------|
| <i>GNLY</i>   | 3  | 0.0000269   |
| <i>CHST10</i> | 24 | 0.0000746   |
| <i>PDCL3</i>  | 3  | 0.000154134 |
| <i>IL1R2</i>  | 0  | 0.0000658   |
| <i>IL1R1</i>  | 1  | 0.0000452   |
| <i>IL1RL1</i> | 13 | 0.0000419   |
| <i>IL18R1</i> | 0  | 0.0000363   |
| <i>CNPPD1</i> | 4  | 0.0000848   |
| <i>UXS1</i>   | 2  | 0.000307463 |
| <i>HDLBP</i>  | 0  | 0.00012765  |
| <i>PASK</i>   | 2  | 0.000103506 |
| <i>TPO</i>    | 7  | 0.000285977 |
| <i>ODC1</i>   | 4  | 0.0000766   |
| <i>QPCT</i>   | 0  | 0.000116201 |
| <i>LCT</i>    | 7  | 0.000294255 |
| <i>PLCL1</i>  | 3  | 0.000049    |
| <i>PLEK</i>   | 1  | 0.000146585 |
| <i>AAK1</i>   | 2  | 0.000228902 |
| <i>TRAK2</i>  | 4  | 0.00019406  |
| <i>ARID3A</i> | 1  | 0.000190158 |
| <i>EPHA4</i>  | 3  | 0.0000507   |
| <i>PAR3B</i>  | 7  | 0.000112737 |
| <i>FARS3</i>  | 3  | 0.000313251 |
| <i>BCL9</i>   | 2  | 0.0000675   |
| <i>MORN1</i>  | 2  | 0.000129588 |
| <i>CEP104</i> | 2  | 0.000256876 |
| <i>MRPL37</i> | 3  | 0.000281297 |
| <i>QSOX1</i>  | 1  | 0.000182501 |
| <i>PHF13</i>  | 2  | 0.000272367 |
| <i>AMPD2</i>  | 1  | 0.000153149 |
| <i>MECR</i>   | 2  | 0.000227062 |
| <i>WDR77</i>  | 2  | 0.000318454 |
| <i>CAPZA1</i> | 0  | 0.000166982 |

|                 |    |             |
|-----------------|----|-------------|
| <i>RNF19B</i>   | 1  | 0.000181358 |
| <i>TRIM62</i>   | 1  | 0.000193223 |
| <i>ARHGEF2</i>  | 1  | 0.000343211 |
| <i>MEF2D</i>    | 1  | 0.000257035 |
| <i>DOCK7</i>    | 3  | 0.000123141 |
| <i>SRM</i>      | 1  | 0.0000282   |
| <i>FBXO2</i>    | 7  | 0.0000319   |
| <i>FBXO6</i>    | 5  | 0.000142697 |
| <i>C1orf21</i>  | 3  | 0.000115811 |
| <i>SWT1</i>     | 14 | 0.000122602 |
| <i>DNAJC6</i>   | 14 | 0.000117589 |
| <i>MFN2</i>     | 1  | 0.0000241   |
| <i>PRG4</i>     | 7  | 0.000068    |
| <i>MIIP</i>     | 0  | 0.0000892   |
| <i>SMG7</i>     | 2  | 0.000285082 |
| <i>NCF2</i>     | 0  | 0.000221995 |
| <i>PLA2G4A</i>  | 0  | 0.000112421 |
| <i>RGS2</i>     | 0  | 0.0000771   |
| <i>AGMAT</i>    | 3  | 0.0000719   |
| <i>CRYZ</i>     | 3  | 0.0000242   |
| <i>PHTF1</i>    | 0  | 0.000216285 |
| <i>ZBTB17</i>   | 0  | 0.000258647 |
| <i>CD58</i>     | 0  | 0.000248196 |
| <i>CD2</i>      | 3  | 0.0000973   |
| <i>TTF2</i>     | 2  | 0.000216891 |
| <i>TMEM9</i>    | 3  | 0.0000383   |
| <i>OSCP1</i>    | 7  | 0.0000282   |
| <i>EXOC8</i>    | 0  | 0.000293802 |
| <i>C1orf109</i> | 3  | 0.000323816 |
| <i>RRAGC</i>    | 0  | 0.000301896 |
| <i>LGALS8</i>   | 0  | 0.000363448 |
| <i>MTR</i>      | 2  | 0.000341422 |
| <i>MYCL</i>     | 1  | 0.0000735   |

|                |    |             |
|----------------|----|-------------|
| <i>SIPA1L2</i> | 0  | 0.0000398   |
| <i>RLF</i>     | 0  | 0.000254272 |
| <i>KMO</i>     | 11 | 0.000122832 |
| <i>RIMS3</i>   | 2  | 0.0000468   |
| <i>SLAMF1</i>  | 2  | 0.000205044 |
| <i>PADI2</i>   | 1  | 0.0000251   |
| <i>KDM5B</i>   | 0  | 0.000314178 |
| <i>UAP1</i>    | 3  | 0.000253713 |
| <i>CTBS</i>    | 0  | 0.000164098 |
| <i>SSX2IP</i>  | 3  | 0.000135462 |
| <i>ZNHIT6</i>  | 3  | 0.000263346 |
| <i>GBP3</i>    | 5  | 0.0000267   |
| <i>GBP1</i>    | 5  | 0.000207845 |
| <i>GPR89A</i>  | 3  | 0.00025051  |
| <i>ECE1</i>    | 1  | 0.00017289  |
| <i>ID3</i>     | 11 | 0.0000292   |
| <i>CR2</i>     | 11 | 0.000109096 |
| <i>CD46</i>    | 0  | 0.000222703 |
| <i>APH1A</i>   | 0  | 0.000348026 |
| <i>SLC2A1</i>  | 4  | 0.000227591 |
| <i>CDC20</i>   | 14 | 0.000182738 |
| <i>MPL</i>     | 7  | 0.000058    |
| <i>ARTN</i>    | 7  | 0.000275092 |
| <i>ATP6V0B</i> | 0  | 0.000215283 |
| <i>PTCH2</i>   | 7  | 0.000187281 |
| <i>F3</i>      | 7  | 0.000281667 |
| <i>FASLG</i>   | 3  | 0.0000891   |
| <i>TNFSF4</i>  | 4  | 0.0000956   |
| <i>PRDX6</i>   | 4  | 0.0000367   |
| <i>RCAN3</i>   | 2  | 0.000165307 |
| <i>MAN1C1</i>  | 2  | 0.0000708   |
| <i>NEK2</i>    | 14 | 0.000175231 |
| <i>RPS6KA1</i> | 1  | 0.000343722 |

|                |    |             |
|----------------|----|-------------|
| <i>NENF</i>    | 3  | 0.000107958 |
| <i>CENPF</i>   | 14 | 0.000245529 |
| <i>RPA2</i>    | 3  | 0.000264321 |
| <i>2-Mar</i>   | 7  | 0.0000464   |
| <i>SLC5A9</i>  | 7  | 0.0000236   |
| <i>OSBPL9</i>  | 0  | 0.000371698 |
| <i>TXNDC12</i> | 0  | 0.000240063 |
| <i>ESYT2</i>   | 3  | 0.000329962 |
| <i>CTSD</i>    | 1  | 0.0000755   |
| <i>STK11</i>   | 4  | 0.000120604 |
| <i>KMT2A</i>   | 2  | 0.000226411 |
| <i>IFT46</i>   | 3  | 0.000227611 |
| <i>MMP8</i>    | 10 | 0.000169992 |
| <i>APOA1</i>   | 7  | 0.0000441   |
| <i>ZNF541</i>  | 7  | 0.000281634 |
| <i>KIF14</i>   | 14 | 0.0000585   |
| <i>ATF6</i>    | 0  | 0.000250397 |
| <i>MREG</i>    | 2  | 0.000253384 |
| <i>KLF7</i>    | 1  | 0.000197165 |
| <i>C1orf54</i> | 7  | 0.0000239   |
| <i>LRMP</i>    | 0  | 0.00024025  |
| <i>SPCS2</i>   | 3  | 0.0000914   |
| <i>HMG3</i>    | 3  | 0.000221196 |
| <i>UBE3D</i>   | 2  | 0.000264747 |
| <i>SGIP1</i>   | 21 | 0.0000758   |
| <i>TNFAIP3</i> | 2  | 0.0000811   |
| <i>MYB</i>     | 2  | 0.0000285   |
| <i>SGK1</i>    | 0  | 0.000117759 |
| <i>FBXL5</i>   | 0  | 0.000172088 |
| <i>VAMP8</i>   | 3  | 0.00012629  |
| <i>FOXO3</i>   | 4  | 0.000185395 |
| <i>ARMC2</i>   | 2  | 0.000173067 |
| <i>ABCG2</i>   | 4  | 0.0000529   |

|                 |    |             |
|-----------------|----|-------------|
| <i>CCNI</i>     | 4  | 0.0000716   |
| <i>RARRES1</i>  | 7  | 0.000261282 |
| <i>EEF2KMT</i>  | 3  | 0.000217804 |
| <i>UBN1</i>     | 1  | 0.00021309  |
| <i>UCHL3</i>    | 3  | 0.000224609 |
| <i>HS1BP3</i>   | 1  | 0.000250642 |
| <i>DNAH7</i>    | 7  | 0.0000254   |
| <i>NDUFB3</i>   | 3  | 0.000054    |
| <i>SATB2</i>    | 7  | 0.000162736 |
| <i>TRPM6</i>    | 0  | 0.0000392   |
| <i>KLF9</i>     | 3  | 0.000138446 |
| <i>ITGB1BP1</i> | 3  | 0.000429226 |
| <i>C1orf198</i> | 4  | 0.000123523 |
| <i>HEATR1</i>   | 3  | 0.000338127 |
| <i>PTBP3</i>    | 0  | 0.000290728 |
| <i>RAD23B</i>   | 0  | 0.000287475 |
| <i>CTNNAL1</i>  | 4  | 0.0000468   |
| <i>ABITRAM</i>  | 0  | 0.000271271 |
| <i>WDR34</i>    | 11 | 0.0000353   |
| <i>SET</i>      | 3  | 0.000177013 |
| <i>CNTRL</i>    | 2  | 0.00031204  |
| <i>NEK6</i>     | 1  | 0.000151504 |
| <i>NDUFA8</i>   | 3  | 0.000271444 |
| <i>HDHD3</i>    | 2  | 0.0000903   |
| <i>SLC46A2</i>  | 1  | 0.000029    |
| <i>HSDL2</i>    | 0  | 0.000190932 |
| <i>NR4A3</i>    | 7  | 0.0000517   |
| <i>INVS</i>     | 2  | 0.000362226 |
| <i>DENND1A</i>  | 1  | 0.00018716  |
| <i>CSF3R</i>    | 1  | 0.000166693 |
| <i>VPS4B</i>    | 0  | 0.000327741 |
| <i>ZBTB45</i>   | 3  | 0.000154682 |
| <i>YLPM1</i>    | 2  | 0.000305261 |

|                 |    |             |
|-----------------|----|-------------|
| <i>DCAF4</i>    | 2  | 0.0000366   |
| <i>IFI27L2</i>  | 3  | 0.0000716   |
| <i>BBOF1</i>    | 4  | 0.000182366 |
| <i>ACYP1</i>    | 2  | 0.000236235 |
| <i>IRF2BPL</i>  | 1  | 0.0000835   |
| <i>ACOT2</i>    | 3  | 0.000119231 |
| <i>AREL1</i>    | 0  | 0.000316259 |
| <i>TTLL5</i>    | 2  | 0.000232928 |
| <i>FLVCR2</i>   | 0  | 0.0000436   |
| <i>GPR68</i>    | 3  | 0.0000655   |
| <i>ESRRB</i>    | 7  | 0.000242563 |
| <i>RHOQ</i>     | 0  | 0.00025024  |
| <i>KLHL29</i>   | 7  | 0.000202799 |
| <i>FKBP1B</i>   | 4  | 0.0000418   |
| <i>YPEL5</i>    | 0  | 0.00019694  |
| <i>CNRIP1</i>   | 7  | 0.000115297 |
| <i>BCL11A</i>   | 11 | 0.000177017 |
| <i>EPCAM</i>    | 7  | 0.000187874 |
| <i>OGFRL1</i>   | 0  | 0.000150597 |
| <i>IFIT3</i>    | 5  | 0.000168759 |
| <i>IFIT2</i>    | 5  | 0.000155324 |
| <i>PYROXD2</i>  | 2  | 0.000173143 |
| <i>CNNM1</i>    | 7  | 0.000259377 |
| <i>MXI1</i>     | 4  | 0.000192616 |
| <i>HELLS</i>    | 3  | 0.0000342   |
| <i>TCTN3</i>    | 2  | 0.000258726 |
| <i>DENND10</i>  | 0  | 0.000251879 |
| <i>KCNIP2</i>   | 1  | 0.0000503   |
| <i>CFAP58</i>   | 0  | 0.0000279   |
| <i>C10orf95</i> | 7  | 0.000105088 |
| <i>SFRP5</i>    | 7  | 0.000227262 |
| <i>GNA13</i>    | 0  | 0.000292416 |
| <i>DUSP1</i>    | 0  | 0.0000443   |

|                  |    |             |
|------------------|----|-------------|
| <i>RCL1</i>      | 3  | 0.000083    |
| <i>EQTN</i>      | 7  | 0.000108622 |
| <i>MOB3B</i>     | 2  | 0.0000707   |
| <i>CD274</i>     | 5  | 0.000200529 |
| <i>NUP43</i>     | 3  | 0.000355551 |
| <i>MTHFD1L</i>   | 2  | 0.0000785   |
| <i>PLEKHG1</i>   | 11 | 0.000176559 |
| <i>CYSTM1</i>    | 0  | 0.0000276   |
| <i>ARAP3</i>     | 1  | 0.000120312 |
| <i>PCDHB14</i>   | 7  | 0.00028516  |
| <i>SNX19</i>     | 2  | 0.000319115 |
| <i>MSANTD2</i>   | 2  | 0.000332495 |
| <i>PDZD11</i>    | 2  | 0.000181761 |
| <i>PLXDC2</i>    | 0  | 0.000194347 |
| <i>CCDC77</i>    | 3  | 0.000255548 |
| <i>TNFSF11</i>   | 7  | 0.0000314   |
| <i>DNAJC15</i>   | 3  | 0.000122528 |
| <i>HSPH1</i>     | 3  | 0.000211696 |
| <i>KBTBD7</i>    | 0  | 0.000118915 |
| <i>KDM3B</i>     | 1  | 0.000272474 |
| <i>GLT8D2</i>    | 7  | 0.000305953 |
| <i>MTERF2</i>    | 3  | 0.000248915 |
| <i>SOCS2</i>     | 3  | 0.0000253   |
| <i>APAF1</i>     | 0  | 0.000243707 |
| <i>DUSP4</i>     | 7  | 0.0000406   |
| <i>CLU</i>       | 4  | 0.000185309 |
| <i>TNFRSF10B</i> | 0  | 0.000166154 |
| <i>SORBS3</i>    | 1  | 0.000188754 |
| <i>PTK2B</i>     | 1  | 0.000256631 |
| <i>PDLIM2</i>    | 1  | 0.000231777 |
| <i>EPHX2</i>     | 2  | 0.00009     |
| <i>UBIAD1</i>    | 2  | 0.000307627 |
| <i>TNFRSF8</i>   | 1  | 0.0000698   |

|                 |    |             |
|-----------------|----|-------------|
| <i>CRISPLD1</i> | 7  | 0.000251855 |
| <i>RDH10</i>    | 3  | 0.000121968 |
| <i>AKAP1</i>    | 2  | 0.000309779 |
| <i>TRIM25</i>   | 1  | 0.000107737 |
| <i>SCPEP1</i>   | 0  | 0.000192137 |
| <i>TEX14</i>    | 7  | 0.000317489 |
| <i>FAM117A</i>  | 4  | 0.000149818 |
| <i>NCAPH</i>    | 14 | 0.0000456   |
| <i>TMEM131L</i> | 2  | 0.000330537 |
| <i>TRIM6</i>    | 5  | 0.0000436   |
| <i>ADCY7</i>    | 1  | 0.000348221 |
| <i>TSHZ3</i>    | 1  | 0.0000386   |
| <i>ECHDC2</i>   | 2  | 0.000191632 |
| <i>PLBD1</i>    | 0  | 0.0000758   |
| <i>TAS2R10</i>  | 3  | 0.0000289   |
| <i>KCNJ8</i>    | 7  | 0.000260676 |
| <i>TAS2R7</i>   | 7  | 0.0000399   |
| <i>BCL2L14</i>  | 7  | 0.000129486 |
| <i>ZSCAN18</i>  | 2  | 0.0000248   |
| <i>TRMT1L</i>   | 3  | 0.000224004 |
| <i>CSTA</i>     | 3  | 0.0000465   |
| <i>B4GALT4</i>  | 3  | 0.000207422 |
| <i>GJA3</i>     | 7  | 0.000219701 |
| <i>TBC1D15</i>  | 3  | 0.000250321 |
| <i>CCRL2</i>    | 0  | 0.0000274   |
| <i>CCR2</i>     | 0  | 0.0000853   |
| <i>POLR3GL</i>  | 3  | 0.000145772 |
| <i>GHSR</i>     | 7  | 0.0000242   |
| <i>TNFSF10</i>  | 0  | 0.000116591 |
| <i>TMEM156</i>  | 3  | 0.000135832 |
| <i>CPXM2</i>    | 7  | 0.00029534  |
| <i>TMEM54</i>   | 7  | 0.000260247 |
| <i>LRIF1</i>    | 0  | 0.000216344 |

|                 |    |             |
|-----------------|----|-------------|
| <i>GPSM2</i>    | 0  | 0.000116924 |
| <i>SV2C</i>     | 7  | 0.000343716 |
| <i>MTERF4</i>   | 2  | 0.000288061 |
| <i>XPNPEP2</i>  | 7  | 0.0000265   |
| <i>OCRL</i>     | 2  | 0.000137003 |
| <i>MRPS2</i>    | 3  | 0.000114615 |
| <i>FMOD</i>     | 11 | 0.000242799 |
| <i>KIAA1191</i> | 3  | 0.000251639 |
| <i>CD244</i>    | 3  | 0.000131681 |
| <i>LY9</i>      | 2  | 0.000174651 |
| <i>SERAC1</i>   | 0  | 0.000155296 |
| <i>NAA60</i>    | 1  | 0.000259837 |
| <i>SLC66A2</i>  | 4  | 0.0000329   |
| <i>ZMIZ2</i>    | 1  | 0.000184594 |
| <i>EEPD1</i>    | 1  | 0.000165585 |
| <i>FAM126A</i>  | 3  | 0.000249721 |
| <i>INHBA</i>    | 10 | 0.000130238 |
| <i>ARL4A</i>    | 4  | 0.0000624   |
| <i>CCZ1</i>     | 3  | 0.000104485 |
| <i>GLIPR2</i>   | 0  | 0.000264048 |
| <i>SLC25A51</i> | 3  | 0.000253596 |
| <i>CALD1</i>    | 4  | 0.000111246 |
| <i>NUDT10</i>   | 7  | 0.0000345   |
| <i>SFTPA1</i>   | 7  | 0.000280151 |
| <i>SRGN</i>     | 0  | 0.000081    |
| <i>EGR2</i>     | 7  | 0.000123189 |
| <i>ZWINT</i>    | 14 | 0.000181618 |
| <i>RBM19</i>    | 2  | 0.00033547  |
| <i>HVCN1</i>    | 0  | 0.0000895   |
| <i>CDKN2C</i>   | 3  | 0.0000267   |
| <i>RNF11</i>    | 4  | 0.0000813   |
| <i>CCDC91</i>   | 3  | 0.000312682 |
| <i>ACOT9</i>    | 0  | 0.000155533 |

|                 |    |             |
|-----------------|----|-------------|
| <i>ADGRE5</i>   | 1  | 0.000165867 |
| <i>WDR83</i>    | 3  | 0.000288939 |
| <i>CCDC70</i>   | 7  | 0.000198246 |
| <i>SPRYD7</i>   | 3  | 0.000203602 |
| <i>EBPL</i>     | 3  | 0.0000543   |
| <i>NLN</i>      | 2  | 0.0000276   |
| <i>OPTN</i>     | 4  | 0.00012602  |
| <i>NEUROD4</i>  | 7  | 0.000246323 |
| <i>ARHGAP9</i>  | 1  | 0.00016775  |
| <i>MMP19</i>    | 7  | 0.000264945 |
| <i>PDE1B</i>    | 1  | 0.0000522   |
| <i>NFE2</i>     | 4  | 0.0000505   |
| <i>STIL</i>     | 4  | 0.0000576   |
| <i>RAB9B</i>    | 2  | 0.0000238   |
| <i>METTL8</i>   | 11 | 0.0000919   |
| <i>TTC21B</i>   | 3  | 0.000334142 |
| <i>TNFAIP6</i>  | 0  | 0.000025    |
| <i>ACVR1C</i>   | 3  | 0.0000499   |
| <i>SLC36A1</i>  | 1  | 0.0000987   |
| <i>LPGAT1</i>   | 0  | 0.000243312 |
| <i>GOS2</i>     | 25 | 0.000129026 |
| <i>KCNJ2</i>    | 0  | 0.0000789   |
| <i>PLA2G12A</i> | 3  | 0.000166778 |
| <i>PFKFB2</i>   | 0  | 0.000097    |
| <i>C4BPB</i>    | 7  | 0.000182797 |
| <i>GPR83</i>    | 7  | 0.000259026 |
| <i>MXD4</i>     | 1  | 0.000141967 |
| <i>CKS2</i>     | 14 | 0.0000611   |
| <i>MOGAT1</i>   | 7  | 0.000177368 |
| <i>FAM124B</i>  | 13 | 0.0000405   |
| <i>ENKD1</i>    | 0  | 0.0000991   |
| <i>FAM210B</i>  | 4  | 0.000251621 |
| <i>PREX1</i>    | 1  | 0.000222806 |

|                 |    |             |
|-----------------|----|-------------|
| <i>KCNS1</i>    | 7  | 0.000269503 |
| <i>CHD6</i>     | 2  | 0.000345998 |
| <i>PLCG1</i>    | 2  | 0.000239633 |
| <i>TOX2</i>     | 7  | 0.000226509 |
| <i>ZNFX1</i>    | 0  | 0.000146991 |
| <i>ZNF831</i>   | 2  | 0.000226754 |
| <i>EDN3</i>     | 7  | 0.000153742 |
| <i>STAU1</i>    | 1  | 0.000200799 |
| <i>CDH26</i>    | 0  | 0.0000758   |
| <i>SNAI1</i>    | 7  | 0.000132857 |
| <i>PMEPA1</i>   | 26 | 0.000154847 |
| <i>ANKRD60</i>  | 7  | 0.000241945 |
| <i>BCAS4</i>    | 2  | 0.0000653   |
| <i>ZBP1</i>     | 5  | 0.000211596 |
| <i>NEURL2</i>   | 3  | 0.0000252   |
| <i>PEPD</i>     | 3  | 0.000208947 |
| <i>CHST8</i>    | 7  | 0.000155153 |
| <i>NAGK</i>     | 0  | 0.0000859   |
| <i>CEACAM8</i>  | 10 | 0.000240153 |
| <i>F13A1</i>    | 4  | 0.000198786 |
| <i>PACSIN1</i>  | 7  | 0.000276012 |
| <i>BTN1A1</i>   | 7  | 0.000202817 |
| <i>SNRPC</i>    | 3  | 0.000127654 |
| <i>SLC17A3</i>  | 7  | 0.0000237   |
| <i>SERPINB6</i> | 2  | 0.000163082 |
| <i>H1-3</i>     | 3  | 0.0000987   |
| <i>NQO2</i>     | 0  | 0.0000243   |
| <i>UNC5CL</i>   | 2  | 0.0000963   |
| <i>RPS10</i>    | 3  | 0.000275326 |
| <i>H2BC11</i>   | 14 | 0.000179884 |
| <i>GNMT</i>     | 1  | 0.0000402   |
| <i>TREM1</i>    | 0  | 0.000104799 |
| <i>MEA1</i>     | 3  | 0.000233297 |

|                |    |             |
|----------------|----|-------------|
| <i>KLHL31</i>  | 7  | 0.0000238   |
| <i>SOX4</i>    | 0  | 0.0000247   |
| <i>CPNE5</i>   | 11 | 0.0000755   |
| <i>KCNK17</i>  | 7  | 0.0000659   |
| <i>RPP40</i>   | 3  | 0.00015766  |
| <i>RUNX2</i>   | 2  | 0.000168933 |
| <i>MYRF</i>    | 7  | 0.000207087 |
| <i>EMC3</i>    | 4  | 0.000200458 |
| <i>WNT1</i>    | 7  | 0.0000822   |
| <i>SH3TC1</i>  | 1  | 0.0000955   |
| <i>LRRC29</i>  | 1  | 0.0000904   |
| <i>BBS2</i>    | 2  | 0.000230234 |
| <i>GPR18</i>   | 3  | 0.0000791   |
| <i>CLYBL</i>   | 2  | 0.000201816 |
| <i>TMTC4</i>   | 2  | 0.000133675 |
| <i>ABCC4</i>   | 4  | 0.0000985   |
| <i>TM9SF2</i>  | 0  | 0.000233176 |
| <i>HROB</i>    | 7  | 0.000215701 |
| <i>UPF3B</i>   | 3  | 0.000285492 |
| <i>RNF113A</i> | 3  | 0.000324524 |
| <i>SEPTIN6</i> | 2  | 0.000185994 |
| <i>NDUFA1</i>  | 3  | 0.0000538   |
| <i>DMAC2L</i>  | 2  | 0.000229355 |
| <i>PTGER2</i>  | 3  | 0.000129793 |
| <i>ARMC7</i>   | 1  | 0.000214362 |
| <i>NUP85</i>   | 2  | 0.000257337 |
| <i>C1orf61</i> | 7  | 0.00020953  |
| <i>DDX31</i>   | 2  | 0.000287631 |
| <i>MBOAT7</i>  | 1  | 0.000161667 |
| <i>SRMS</i>    | 7  | 0.000037    |
| <i>OPRL1</i>   | 1  | 0.000142352 |
| <i>IL1B</i>    | 0  | 0.0000539   |
| <i>PSD4</i>    | 1  | 0.000239458 |

|                 |    |             |
|-----------------|----|-------------|
| <i>SLC25A23</i> | 1  | 0.0000481   |
| <i>PSPN</i>     | 1  | 0.0000258   |
| <i>GTF2F1</i>   | 0  | 0.000174139 |
| <i>ALKBH7</i>   | 3  | 0.000111973 |
| <i>CLPP</i>     | 3  | 0.00014866  |
| <i>GRIA3</i>    | 7  | 0.000162393 |
| <i>C3</i>       | 7  | 0.0000694   |
| <i>SH2D3A</i>   | 1  | 0.000100604 |
| <i>TRIP10</i>   | 7  | 0.0000255   |
| <i>GPR108</i>   | 0  | 0.000246519 |
| <i>TNFSF14</i>  | 0  | 0.000161689 |
| <i>FOSB</i>     | 25 | 0.000175914 |
| <i>RTN2</i>     | 1  | 0.0000241   |
| <i>VASP</i>     | 0  | 0.000136341 |
| <i>CD93</i>     | 0  | 0.0000749   |
| <i>PSMF1</i>    | 4  | 0.000147339 |
| <i>TMX4</i>     | 0  | 0.00020868  |
| <i>STK35</i>    | 1  | 0.000308951 |
| <i>NRSN2</i>    | 7  | 0.000292454 |
| <i>RRBP1</i>    | 0  | 0.0000734   |
| <i>BMP2</i>     | 7  | 0.000166746 |
| <i>BFSP1</i>    | 7  | 0.0000377   |
| <i>MGME1</i>    | 3  | 0.000234848 |
| <i>FAM110A</i>  | 1  | 0.000106956 |
| <i>SIRPD</i>    | 1  | 0.000120672 |
| <i>S1PR4</i>    | 0  | 0.0000834   |
| <i>NCLN</i>     | 1  | 0.000212844 |
| <i>CITED1</i>   | 7  | 0.0000976   |
| <i>ARMCX5</i>   | 3  | 0.000345342 |
| <i>NECAB3</i>   | 1  | 0.0000587   |
| <i>DYNLRB1</i>  | 2  | 0.0000854   |
| <i>ERGIC3</i>   | 2  | 0.000220828 |
| <i>ROMO1</i>    | 3  | 0.0000512   |

|                |   |             |
|----------------|---|-------------|
| <i>PLAGL2</i>  | 1 | 0.000150231 |
| <i>MMP24OS</i> | 1 | 0.000251876 |
| <i>KDM5C</i>   | 2 | 0.0000286   |
| <i>AMOT</i>    | 2 | 0.0000427   |
| <i>TMEM115</i> | 1 | 0.000200627 |
| <i>UROD</i>    | 3 | 0.000188657 |
| <i>ST3GAL3</i> | 2 | 0.000205338 |
| <i>HECTD3</i>  | 1 | 0.000212558 |
| <i>TUBGCP3</i> | 2 | 0.000323899 |
| <i>PCID2</i>   | 3 | 0.000368001 |
| <i>LRFN3</i>   | 7 | 0.0000797   |
| <i>IGFLR1</i>  | 3 | 0.0000269   |
| <i>CAPNS1</i>  | 1 | 0.0000856   |
| <i>PDCD2L</i>  | 3 | 0.000121202 |
| <i>FFAR2</i>   | 0 | 0.0000838   |
| <i>HCST</i>    | 3 | 0.0000264   |
| <i>FFAR1</i>   | 7 | 0.000245099 |
| <i>COX6B1</i>  | 3 | 0.0000728   |
| <i>THRA</i>    | 1 | 0.000160314 |
| <i>CCR7</i>    | 3 | 0.0000812   |
| <i>NR1D1</i>   | 1 | 0.0000427   |
| <i>FRMD8</i>   | 1 | 0.000267495 |
| <i>BCL2L12</i> | 2 | 0.0000305   |
| <i>IRF3</i>    | 2 | 0.000238641 |
| <i>SCAF1</i>   | 1 | 0.000143492 |
| <i>TSKS</i>    | 7 | 0.0000278   |
| <i>ASL</i>     | 0 | 0.000155288 |
| <i>CSN1S1</i>  | 7 | 0.0000383   |
| <i>STAT5A</i>  | 0 | 0.000205961 |
| <i>WNK4</i>    | 7 | 0.000306889 |
| <i>TRAP1</i>   | 2 | 0.000206618 |
| <i>AHDC1</i>   | 1 | 0.000162298 |
| <i>DACH2</i>   | 7 | 0.000175601 |

|                |    |             |
|----------------|----|-------------|
| <i>CFP</i>     | 0  | 0.000101611 |
| <i>DLGAP5</i>  | 14 | 0.000180912 |
| <i>L3HYPDH</i> | 3  | 0.000294975 |
| <i>HSPA2</i>   | 7  | 0.0000244   |
| <i>PLEKHG3</i> | 1  | 0.00019398  |
| <i>RHOT1</i>   | 0  | 0.000277727 |
| <i>EVI2A</i>   | 3  | 0.0000621   |
| <i>OMG</i>     | 0  | 0.0000258   |
| <i>NUP214</i>  | 0  | 0.000314358 |
| <i>SLC10A3</i> | 1  | 0.0000912   |
| <i>MAP2K2</i>  | 1  | 0.0000455   |
| <i>HNRNPH2</i> | 0  | 0.000128923 |
| <i>NXF5</i>    | 7  | 0.000158484 |
| <i>TIMM8A</i>  | 3  | 0.000256584 |
| <i>ZC4H2</i>   | 2  | 0.000116204 |
| <i>CANX</i>    | 3  | 0.000292945 |
| <i>PPCS</i>    | 3  | 0.000321521 |
| <i>BCL11B</i>  | 2  | 0.000247285 |
| <i>HELB</i>    | 2  | 0.000308602 |
| <i>PTPRB</i>   | 7  | 0.0000886   |
| <i>YEATS4</i>  | 3  | 0.000132419 |
| <i>TAS2R3</i>  | 2  | 0.00014701  |
| <i>TAS2R4</i>  | 2  | 0.000143916 |
| <i>TAS2R5</i>  | 2  | 0.0000974   |
| <i>LRRC61</i>  | 1  | 0.000155608 |
| <i>TRPV5</i>   | 7  | 0.000197556 |
| <i>IDUA</i>    | 1  | 0.000153993 |
| <i>FGFRL1</i>  | 1  | 0.000048    |
| <i>AUNIP</i>   | 7  | 0.000119251 |
| <i>ADGRE2</i>  | 1  | 0.0000375   |
| <i>SIN3B</i>   | 1  | 0.000175593 |
| <i>EPS15L1</i> | 1  | 0.000218299 |
| <i>F2RL3</i>   | 4  | 0.0000345   |

|                 |    |             |
|-----------------|----|-------------|
| <i>UQCR11</i>   | 3  | 0.000074    |
| <i>GFER</i>     | 3  | 0.000186106 |
| <i>KDM4B</i>    | 1  | 0.00021407  |
| <i>EMC6</i>     | 3  | 0.000171233 |
| <i>METTL16</i>  | 2  | 0.000254396 |
| <i>TUBA4A</i>   | 0  | 0.000167396 |
| <i>VIL1</i>     | 4  | 0.0000683   |
| <i>AAMP</i>     | 3  | 0.000210173 |
| <i>TNFRSF19</i> | 7  | 0.000248274 |
| <i>ECHS1</i>    | 3  | 0.000209003 |
| <i>GNG11</i>    | 4  | 0.0000952   |
| <i>PTPN12</i>   | 0  | 0.000185393 |
| <i>POR</i>      | 1  | 0.000121833 |
| <i>STYXL1</i>   | 0  | 0.000237689 |
| <i>STEAP4</i>   | 0  | 0.0000892   |
| <i>SGCE</i>     | 27 | 0.000154847 |
| <i>LRFN1</i>    | 1  | 0.000121005 |
| <i>ZFP36</i>    | 1  | 0.0000979   |
| <i>PAICS</i>    | 3  | 0.000161762 |
| <i>ADM2</i>     | 7  | 0.000164431 |
| <i>DGCR6L</i>   | 3  | 0.000176332 |
| <i>DGCR8</i>    | 2  | 0.000207348 |
| <i>ASPHD2</i>   | 5  | 0.0000278   |
| <i>SDF2L1</i>   | 3  | 0.000131343 |
| <i>GAL3ST1</i>  | 7  | 0.00029408  |
| <i>YWHAH</i>    | 1  | 0.0000559   |
| <i>GNAZ</i>     | 4  | 0.000247289 |
| <i>ADORA2A</i>  | 2  | 0.0000508   |
| <i>ATF4</i>     | 3  | 0.000233233 |
| <i>CDC42EP1</i> | 7  | 0.0000238   |
| <i>APOL3</i>    | 3  | 0.000175216 |
| <i>TPST2</i>    | 0  | 0.000146234 |
| <i>MPST</i>     | 0  | 0.0000532   |

|                 |   |             |
|-----------------|---|-------------|
| <i>TST</i>      | 0 | 0.0000938   |
| <i>IGLL1</i>    | 7 | 0.0000446   |
| <i>APOL2</i>    | 0 | 0.0000985   |
| <i>APOBEC3A</i> | 1 | 0.0000528   |
| <i>APOBEC3F</i> | 1 | 0.0000862   |
| <i>RIBC2</i>    | 7 | 0.000222745 |
| <i>RNF112</i>   | 7 | 0.000289124 |
| <i>SPECC1</i>   | 4 | 0.000129579 |
| <i>DOCK4</i>    | 5 | 0.0000263   |
| <i>ATP6V1F</i>  | 3 | 0.0000806   |
| <i>CDHR3</i>    | 2 | 0.000105057 |
| <i>STRIP2</i>   | 7 | 0.000034    |
| <i>LRRC4</i>    | 0 | 0.000120547 |
| <i>OPN1SW</i>   | 7 | 0.0000236   |
| <i>HAT1</i>     | 3 | 0.000107544 |
| <i>HERC2</i>    | 2 | 0.000182943 |
| <i>SNRPN</i>    | 2 | 0.000233041 |
| <i>WDFY4</i>    | 1 | 0.0000698   |
| <i>MYO5C</i>    | 7 | 0.0000303   |
| <i>TMOD2</i>    | 0 | 0.000106995 |
| <i>CCDC32</i>   | 2 | 0.000187835 |
| <i>KNSTRN</i>   | 0 | 0.0000576   |
| <i>CHAC1</i>    | 7 | 0.000163736 |
| <i>CLN6</i>     | 2 | 0.0000302   |
| <i>VPS13C</i>   | 3 | 0.000294421 |
| <i>CALML4</i>   | 0 | 0.0000439   |
| <i>THAP10</i>   | 7 | 0.0000638   |
| <i>ANAPC13</i>  | 0 | 0.000227395 |
| <i>SUMF2</i>    | 3 | 0.00030013  |
| <i>TPH1</i>     | 3 | 0.0000674   |
| <i>E2F8</i>     | 7 | 0.0000788   |
| <i>DCTD</i>     | 3 | 0.000422317 |
| <i>USP6</i>     | 7 | 0.0000356   |

|                |    |             |
|----------------|----|-------------|
| <i>ATP1B2</i>  | 7  | 0.0000243   |
| <i>FXR2</i>    | 0  | 0.000232027 |
| <i>KIF1C</i>   | 1  | 0.000269974 |
| <i>KRI1</i>    | 2  | 0.000165578 |
| <i>CDKN2D</i>  | 0  | 0.0000354   |
| <i>SIGLEC9</i> | 1  | 0.00019699  |
| <i>RIPK3</i>   | 1  | 0.000235683 |
| <i>ADCY4</i>   | 1  | 0.000119369 |
| <i>RAB2B</i>   | 4  | 0.000128349 |
| <i>HEATR5A</i> | 0  | 0.000242508 |
| <i>TEP1</i>    | 1  | 0.000267167 |
| <i>QRICH2</i>  | 2  | 0.0000772   |
| <i>FOXJ1</i>   | 7  | 0.000149938 |
| <i>SEC14L1</i> | 1  | 0.000174144 |
| <i>AANAT</i>   | 7  | 0.000257188 |
| <i>ASH2L</i>   | 0  | 0.000100276 |
| <i>CHRNA10</i> | 1  | 0.000157614 |
| <i>RPS4Y1</i>  | 12 | 0.000165137 |
| <i>DOHH</i>    | 3  | 0.0000475   |
| <i>PLPPR3</i>  | 7  | 0.000160219 |
| <i>CBFA2T3</i> | 1  | 0.00013873  |
| <i>GAMT</i>    | 3  | 0.0000511   |
| <i>PUDP</i>    | 2  | 0.0000719   |
| <i>ERMARD</i>  | 2  | 0.000355715 |
| <i>GALNT8</i>  | 7  | 0.0000511   |
| <i>KCNA5</i>   | 7  | 0.000162855 |
| <i>FAM155B</i> | 7  | 0.000171866 |
| <i>SAT1</i>    | 0  | 0.000132988 |
| <i>GNL3L</i>   | 2  | 0.000165352 |
| <i>SH3BP4</i>  | 7  | 0.000119725 |
| <i>MOSPD2</i>  | 0  | 0.000143142 |
| <i>ECSIT</i>   | 4  | 0.0000636   |
| <i>ELOF1</i>   | 4  | 0.00014648  |

|                |   |             |
|----------------|---|-------------|
| <i>TSPAN16</i> | 7 | 0.0000854   |
| <i>APOC1</i>   | 7 | 0.000111308 |
| <i>XPO7</i>    | 4 | 0.000138379 |
| <i>BST2</i>    | 5 | 0.000108289 |
| <i>SLC27A1</i> | 1 | 0.000146777 |
| <i>DDA1</i>    | 1 | 0.000254848 |
| <i>MRPL34</i>  | 3 | 0.000136525 |
| <i>PGLS</i>    | 1 | 0.000163078 |
| <i>TULP4</i>   | 2 | 0.000311868 |
| <i>SNX9</i>    | 2 | 0.00022225  |
| <i>QRSL1</i>   | 3 | 0.000205624 |
| <i>RSPH3</i>   | 0 | 0.000136854 |
| <i>MLLT1</i>   | 1 | 0.000127909 |
| <i>ACTN4</i>   | 1 | 0.000120872 |
| <i>STK33</i>   | 7 | 0.0000942   |
| <i>EPO</i>     | 7 | 0.000227595 |
| <i>ARPC1B</i>  | 0 | 0.000283466 |
| <i>FCHO1</i>   | 1 | 0.00023211  |
| <i>UNC13A</i>  | 7 | 0.000281375 |
| <i>MAP1S</i>   | 1 | 0.000214734 |
| <i>PXDN</i>    | 7 | 0.000276365 |
| <i>JUND</i>    | 1 | 0.0000283   |
| <i>TRPM4</i>   | 7 | 0.000275355 |
| <i>UBAC1</i>   | 0 | 0.000185581 |
| <i>SAG</i>     | 7 | 0.000280474 |
| <i>ZBTB46</i>  | 7 | 0.0000635   |
| <i>SAMD10</i>  | 1 | 0.0000558   |
| <i>LSP1</i>    | 1 | 0.000108291 |
| <i>TNNI2</i>   | 0 | 0.0000246   |
| <i>TUBGCP2</i> | 1 | 0.000289425 |
| <i>PNPLA7</i>  | 7 | 0.0000376   |
| <i>ZNF337</i>  | 3 | 0.000363325 |
| <i>TAF4</i>    | 1 | 0.000203883 |

|                  |    |             |
|------------------|----|-------------|
| <i>OSBPL2</i>    | 0  | 0.000305561 |
| <i>CHMP2A</i>    | 0  | 0.000156768 |
| <i>UBE2M</i>     | 0  | 0.0000467   |
| <i>METTL26</i>   | 1  | 0.0000631   |
| <i>EIF2S3</i>    | 3  | 0.000224395 |
| <i>GMFG</i>      | 0  | 0.0000908   |
| <i>SESN2</i>     | 1  | 0.000144243 |
| <i>THEMIS2</i>   | 0  | 0.000220492 |
| <i>CLIP1</i>     | 0  | 0.000312813 |
| <i>HIP1R</i>     | 2  | 0.0000712   |
| <i>PPAN</i>      | 3  | 0.0000943   |
| <i>SLC6A8</i>    | 4  | 0.000123357 |
| <i>MPP1</i>      | 4  | 0.000272333 |
| <i>ZNF331</i>    | 3  | 0.0002663   |
| <i>ZNF236</i>    | 2  | 0.000348483 |
| <i>C12orf65</i>  | 3  | 0.000302318 |
| <i>CASZ1</i>     | 1  | 0.000105585 |
| <i>PKDREJ</i>    | 7  | 0.000293277 |
| <i>HABP4</i>     | 3  | 0.000185863 |
| <i>AKAP12</i>    | 23 | 0.000204739 |
| <i>SYNE1</i>     | 2  | 0.0000889   |
| <i>LILRB2</i>    | 1  | 0.0000938   |
| <i>AAR2</i>      | 2  | 0.000312237 |
| <i>GGT7</i>      | 2  | 0.000179173 |
| <i>GSE1</i>      | 1  | 0.0000575   |
| <i>GIN52</i>     | 14 | 0.000213995 |
| <i>SLC34A1</i>   | 7  | 0.000210571 |
| <i>PRR7</i>      | 1  | 0.000146174 |
| <i>NFATC1</i>    | 1  | 0.000139952 |
| <i>IDO1</i>      | 5  | 0.0000639   |
| <i>CAP1</i>      | 0  | 0.000253705 |
| <i>PPT1</i>      | 0  | 0.0000642   |
| <i>RAB11FIP4</i> | 0  | 0.000241202 |

|                   |    |             |
|-------------------|----|-------------|
| <i>RLIM</i>       | 0  | 0.000309671 |
| <i>TRAF3</i>      | 2  | 0.000306432 |
| <i>HAUS8</i>      | 3  | 0.000167212 |
| <i>ADGRE3</i>     | 0  | 0.000141378 |
| <i>SH3BP5</i>     | 3  | 0.000253295 |
| <i>RFTN1</i>      | 2  | 0.000321489 |
| <i>SLC6A6</i>     | 1  | 0.000234784 |
| <i>KCNC3</i>      | 1  | 0.000056    |
| <i>NAPSA</i>      | 7  | 0.0000249   |
| <i>MGAT1</i>      | 0  | 0.000302788 |
| <i>TUBG1</i>      | 2  | 0.0000255   |
| <i>RPL27</i>      | 3  | 0.000061    |
| <i>PSMC3IP</i>    | 2  | 0.0000235   |
| <i>AOC3</i>       | 1  | 0.0000605   |
| <i>ACLY</i>       | 0  | 0.000180398 |
| <i>AOC2</i>       | 1  | 0.000119311 |
| <i>NDUFA2</i>     | 3  | 0.000161856 |
| <i>DIAPH1</i>     | 1  | 0.000240304 |
| <i>NDFIP1</i>     | 3  | 0.000315703 |
| <i>PPFIA1</i>     | 1  | 0.000215337 |
| <i>TMEM204</i>    | 3  | 0.0000256   |
| <i>BARX1</i>      | 7  | 0.000206584 |
| <i>NINJ1</i>      | 1  | 0.000137357 |
| <i>MAP1B</i>      | 7  | 0.000145202 |
| <i>IL13RA1</i>    | 0  | 0.000138857 |
| <i>CKMT2</i>      | 7  | 0.000285307 |
| <i>TOP2A</i>      | 14 | 0.000219166 |
| <i>RARA</i>       | 1  | 0.00020069  |
| <i>CHD1L</i>      | 3  | 0.000379288 |
| <i>PEX11B</i>     | 3  | 0.00039667  |
| <i>FMO5</i>       | 0  | 0.00018959  |
| <i>RAI2</i>       | 7  | 0.0000361   |
| <i>AC005261.1</i> | 3  | 0.000240056 |

|                   |    |             |
|-------------------|----|-------------|
| <i>ZSCAN5A</i>    | 2  | 0.000229454 |
| <i>ZNF132</i>     | 3  | 0.0000766   |
| <i>CHSY1</i>      | 0  | 0.000102974 |
| <i>RHPN2</i>      | 7  | 0.000153078 |
| <i>C19orf12</i>   | 3  | 0.000339463 |
| <i>LGALS3</i>     | 4  | 0.0000295   |
| <i>ZNF20</i>      | 0  | 0.0000708   |
| <i>C19orf57</i>   | 7  | 0.000147963 |
| <i>TRIM21</i>     | 0  | 0.000185641 |
| <i>SPATA6</i>     | 0  | 0.0000414   |
| <i>CCT6B</i>      | 3  | 0.0000272   |
| <i>RAF1</i>       | 0  | 0.000290332 |
| <i>PPARG</i>      | 7  | 0.000188204 |
| <i>FCRLA</i>      | 11 | 0.000157247 |
| <i>ENOSF1</i>     | 2  | 0.000103236 |
| <i>EMILIN2</i>    | 1  | 0.000117676 |
| <i>TRIM5</i>      | 5  | 0.000162836 |
| <i>TRIM22</i>     | 5  | 0.000183048 |
| <i>RRP8</i>       | 2  | 0.000411298 |
| <i>ILKAP</i>      | 2  | 0.000278121 |
| <i>PER2</i>       | 1  | 0.000225569 |
| <i>PTPRE</i>      | 0  | 0.000301085 |
| <i>CARD6</i>      | 0  | 0.0000743   |
| <i>AC002316.1</i> | 1  | 0.000228926 |
| <i>RPA1</i>       | 2  | 0.000154612 |
| <i>TBC1D14</i>    | 0  | 0.000238106 |
| <i>COQ3</i>       | 3  | 0.000118752 |
| <i>LANCL2</i>     | 3  | 0.000350813 |
| <i>ENAM</i>       | 7  | 0.000268591 |
| <i>JCHAIN</i>     | 15 | 0.000201145 |
| <i>UTP3</i>       | 3  | 0.0000882   |
| <i>WBP2</i>       | 1  | 0.000124991 |
| <i>UNK</i>        | 2  | 0.000273529 |

|                |    |             |
|----------------|----|-------------|
| <i>EIF5A</i>   | 3  | 0.000146094 |
| <i>KDM6B</i>   | 1  | 0.000144696 |
| <i>GPS2</i>    | 1  | 0.0000838   |
| <i>XAF1</i>    | 5  | 0.000198902 |
| <i>DLG4</i>    | 1  | 0.000147471 |
| <i>RIDA</i>    | 3  | 0.0000758   |
| <i>REEP2</i>   | 7  | 0.00027247  |
| <i>PCBD2</i>   | 2  | 0.000341214 |
| <i>SDF2</i>    | 0  | 0.00032871  |
| <i>PRMT7</i>   | 2  | 0.000340855 |
| <i>ANKEF1</i>  | 3  | 0.000148247 |
| <i>SCP2D1</i>  | 7  | 0.00013375  |
| <i>PCED1A</i>  | 2  | 0.000199749 |
| <i>BTBD3</i>   | 0  | 0.0000854   |
| <i>RAB25</i>   | 7  | 0.000105134 |
| <i>FCRL2</i>   | 11 | 0.000160188 |
| <i>SYT11</i>   | 3  | 0.000103887 |
| <i>IGHMBP2</i> | 1  | 0.0000305   |
| <i>ACY3</i>    | 7  | 0.0000746   |
| <i>TESMIN</i>  | 0  | 0.0000959   |
| <i>MMACHC</i>  | 2  | 0.0000409   |
| <i>DPH2</i>    | 2  | 0.00017641  |
| <i>RBM38</i>   | 4  | 0.000156065 |
| <i>VSTM2L</i>  | 7  | 0.000195919 |
| <i>PPP1R3D</i> | 0  | 0.000241968 |
| <i>DMGDH</i>   | 7  | 0.00029787  |
| <i>ZBED3</i>   | 7  | 0.0000244   |
| <i>PATJ</i>    | 3  | 0.000219669 |
| <i>FBXO44</i>  | 2  | 0.0000463   |
| <i>CPLANE2</i> | 3  | 0.0000354   |
| <i>CASP9</i>   | 0  | 0.000251649 |
| <i>ATP8A2</i>  | 7  | 0.000140779 |
| <i>XPO4</i>    | 3  | 0.000347892 |

|                |    |             |
|----------------|----|-------------|
| <i>CDK8</i>    | 3  | 0.00025083  |
| <i>ALOX5AP</i> | 0  | 0.0000383   |
| <i>WASF3</i>   | 7  | 0.0000582   |
| <i>CHRM3</i>   | 7  | 0.000301098 |
| <i>PEMT</i>    | 1  | 0.0000609   |
| <i>PIK3C2B</i> | 2  | 0.000109429 |
| <i>LGR6</i>    | 3  | 0.0000933   |
| <i>TMCC2</i>   | 4  | 0.0000545   |
| <i>SPART</i>   | 0  | 0.000192093 |
| <i>EPSTI1</i>  | 5  | 0.000160916 |
| <i>TPT1</i>    | 3  | 0.0000592   |
| <i>RFC3</i>    | 3  | 0.000233686 |
| <i>BEX2</i>    | 3  | 0.0000432   |
| <i>TCEAL4</i>  | 3  | 0.0000423   |
| <i>FAM104A</i> | 4  | 0.00032447  |
| <i>EPHB2</i>   | 7  | 0.000111104 |
| <i>PRAM1</i>   | 1  | 0.000108914 |
| <i>KMT5C</i>   | 1  | 0.0000464   |
| <i>PDE6B</i>   | 3  | 0.000135738 |
| <i>CSNK1G2</i> | 1  | 0.000204116 |
| <i>CNDP2</i>   | 2  | 0.00023646  |
| <i>MACROD1</i> | 2  | 0.000100774 |
| <i>LGALS12</i> | 13 | 0.000135394 |
| <i>RTN3</i>    | 0  | 0.000174192 |
| <i>MORC2</i>   | 2  | 0.000328015 |
| <i>LARGE1</i>  | 26 | 0.000154847 |
| <i>SLC2A11</i> | 2  | 0.000063    |
| <i>C1QTNF6</i> | 3  | 0.000168387 |
| <i>SEC14L4</i> | 4  | 0.0000447   |
| <i>MKRN1</i>   | 4  | 0.000261229 |
| <i>E2F5</i>    | 11 | 0.000229923 |
| <i>CA1</i>     | 4  | 0.0000417   |
| <i>ARNTL</i>   | 0  | 0.000273612 |

|                 |    |             |
|-----------------|----|-------------|
| <i>LYVE1</i>    | 0  | 0.0000237   |
| <i>MICAL2</i>   | 1  | 0.0000844   |
| <i>RNF122</i>   | 1  | 0.000148078 |
| <i>ERG28</i>    | 2  | 0.000276447 |
| <i>GSC</i>      | 7  | 0.000131692 |
| <i>DGLUCY</i>   | 1  | 0.000192793 |
| <i>NUMB</i>     | 1  | 0.000185495 |
| <i>CATSPERB</i> | 2  | 0.0000238   |
| <i>ADAM20</i>   | 2  | 0.0000815   |
| <i>LOXL2</i>    | 2  | 0.0000742   |
| <i>CCNB1</i>    | 14 | 0.000223091 |
| <i>CD180</i>    | 11 | 0.0000944   |
| <i>IRAK2</i>    | 0  | 0.0000447   |
| <i>CAMK1</i>    | 13 | 0.000106422 |
| <i>VHL</i>      | 3  | 0.000494772 |
| <i>BHLHE40</i>  | 1  | 0.0000486   |
| <i>MEIS2</i>    | 7  | 0.000302279 |
| <i>KATNBL1</i>  | 0  | 0.000106044 |
| <i>REG4</i>     | 7  | 0.000298242 |
| <i>TSPAN2</i>   | 0  | 0.0000444   |
| <i>VAV3</i>     | 0  | 0.000242973 |
| <i>PSRC1</i>    | 0  | 0.0000253   |
| <i>SORT1</i>    | 1  | 0.0000594   |
| <i>NOTCH2</i>   | 1  | 0.00019899  |
| <i>TRIM45</i>   | 7  | 0.00032627  |
| <i>FKBP11</i>   | 1  | 0.000175571 |
| <i>RSAD2</i>    | 5  | 0.000159648 |
| <i>MYCN</i>     | 7  | 0.000225195 |
| <i>LPIN1</i>    | 2  | 0.000317393 |
| <i>CMPK2</i>    | 5  | 0.000189493 |
| <i>LDHA</i>     | 3  | 0.000158809 |
| <i>IL6ST</i>    | 3  | 0.000133827 |
| <i>NAV1</i>     | 2  | 0.0000613   |

|                 |    |             |
|-----------------|----|-------------|
| <i>RPS15A</i>   | 3  | 0.0000522   |
| <i>IL2RA</i>    | 2  | 0.0000331   |
| <i>ANKRD16</i>  | 2  | 0.000156622 |
| <i>ECHDC3</i>   | 0  | 0.0000533   |
| <i>IL15RA</i>   | 2  | 0.000042    |
| <i>HRH4</i>     | 13 | 0.0000601   |
| <i>TMEM241</i>  | 2  | 0.0000829   |
| <i>KCTD1</i>    | 24 | 0.000174281 |
| <i>KLRD1</i>    | 3  | 0.0000964   |
| <i>PRH2</i>     | 7  | 0.000182244 |
| <i>MYBPC3</i>   | 1  | 0.0000464   |
| <i>ACP2</i>     | 1  | 0.0001517   |
| <i>RTL8C</i>    | 1  | 0.0000504   |
| <i>PIWIL4</i>   | 28 | 0.000154847 |
| <i>PHC2</i>     | 1  | 0.000143347 |
| <i>AGO4</i>     | 0  | 0.000273455 |
| <i>CYP2J2</i>   | 7  | 0.0000501   |
| <i>TPGS2</i>    | 2  | 0.000101574 |
| <i>DAGLA</i>    | 7  | 0.000106861 |
| <i>DHX34</i>    | 1  | 0.000194609 |
| <i>TMEM258</i>  | 3  | 0.000155139 |
| <i>TCN1</i>     | 10 | 0.0000585   |
| <i>C5AR2</i>    | 0  | 0.000213193 |
| <i>TMEM165</i>  | 0  | 0.000241861 |
| <i>GGACT</i>    | 3  | 0.000108443 |
| <i>UBAC2</i>    | 2  | 0.00038088  |
| <i>TPP2</i>     | 3  | 0.000349815 |
| <i>ARHGAP32</i> | 2  | 0.000089    |
| <i>ETS1</i>     | 2  | 0.000272601 |
| <i>SLC37A2</i>  | 1  | 0.0000903   |
| <i>TMED7</i>    | 3  | 0.0001964   |
| <i>APC</i>      | 0  | 0.000248925 |
| <i>NREP</i>     | 3  | 0.0000652   |

|                |   |             |
|----------------|---|-------------|
| <i>OSTF1</i>   | 0 | 0.000267289 |
| <i>C9orf40</i> | 4 | 0.000100418 |
| <i>CTSL</i>    | 3 | 0.0000239   |
| <i>ISCA1</i>   | 4 | 0.000049    |
| <i>ADAM19</i>  | 1 | 0.00017447  |
| <i>HAVCR2</i>  | 3 | 0.0000818   |
| <i>CCNJL</i>   | 1 | 0.0000976   |
| <i>USP30</i>   | 2 | 0.000336756 |
| <i>SDS</i>     | 7 | 0.000277196 |
| <i>OASL</i>    | 5 | 0.000185827 |
| <i>RNFT2</i>   | 7 | 0.0000572   |
| <i>BICDL1</i>  | 2 | 0.000120911 |
| <i>TRAFD1</i>  | 0 | 0.000158157 |
| <i>TMEM243</i> | 3 | 0.000323049 |
| <i>CCDC146</i> | 0 | 0.0000257   |
| <i>CD36</i>    | 0 | 0.0000707   |
| <i>PNPLA8</i>  | 3 | 0.000178068 |
| <i>HILPDA</i>  | 3 | 0.0000494   |
| <i>ANKRD6</i>  | 0 | 0.000101387 |
| <i>KHDC1</i>   | 7 | 0.0000245   |
| <i>AKIRIN2</i> | 0 | 0.000235055 |
| <i>PRR5L</i>   | 3 | 0.000102116 |
| <i>LMO2</i>    | 0 | 0.0000948   |
| <i>PHF21A</i>  | 0 | 0.000219399 |
| <i>NAT10</i>   | 2 | 0.000311184 |
| <i>EHF</i>     | 7 | 0.000262705 |
| <i>PRRG4</i>   | 0 | 0.0000235   |
| <i>ATP5MC2</i> | 3 | 0.000150969 |
| <i>AVIL</i>    | 1 | 0.000041    |
| <i>TESPA1</i>  | 2 | 0.00020033  |
| <i>AGAP2</i>   | 1 | 0.000257199 |
| <i>BLOC1S1</i> | 3 | 0.0000313   |
| <i>CDK4</i>    | 2 | 0.000180736 |

|                  |   |             |
|------------------|---|-------------|
| <i>TROAP</i>     | 4 | 0.0000355   |
| <i>COQ10A</i>    | 3 | 0.000287637 |
| <i>PAN2</i>      | 2 | 0.000263528 |
| <i>KRT7</i>      | 7 | 0.000298898 |
| <i>HNRNPA1</i>   | 3 | 0.0000447   |
| <i>ACVR1B</i>    | 1 | 0.00018921  |
| <i>OS9</i>       | 1 | 0.000313601 |
| <i>LTV1</i>      | 3 | 0.000275702 |
| <i>AFG1L</i>     | 3 | 0.00032984  |
| <i>HEY2</i>      | 7 | 0.000252417 |
| <i>SMPD2</i>     | 1 | 0.000195612 |
| <i>TEC</i>       | 2 | 0.000122912 |
| <i>SEMA4F</i>    | 2 | 0.000277739 |
| <i>RAB11FIP5</i> | 3 | 0.0000586   |
| <i>SMYD5</i>     | 2 | 0.000185638 |
| <i>DYSF</i>      | 1 | 0.000124156 |
| <i>USP15</i>     | 0 | 0.000155785 |
| <i>GNS</i>       | 0 | 0.000200807 |
| <i>CPM</i>       | 0 | 0.0000379   |
| <i>MPHOSPH6</i>  | 3 | 0.00022299  |
| <i>KIAA0513</i>  | 1 | 0.000215665 |
| <i>FBXL8</i>     | 1 | 0.0000503   |
| <i>FHOD1</i>     | 1 | 0.00023345  |
| <i>CCDC102A</i>  | 3 | 0.000059    |
| <i>SLC9A5</i>    | 7 | 0.000267393 |
| <i>PCNX2</i>     | 2 | 0.000234237 |
| <i>URB2</i>      | 2 | 0.000345122 |
| <i>EGLN1</i>     | 0 | 0.000203637 |
| <i>ABCB10</i>    | 3 | 0.000153762 |
| <i>NTPCR</i>     | 2 | 0.000156536 |
| <i>GLUL</i>      | 0 | 0.0000818   |
| <i>STX6</i>      | 0 | 0.000387832 |
| <i>RNASEL</i>    | 0 | 0.000287723 |

|                 |    |             |
|-----------------|----|-------------|
| <i>NPL</i>      | 0  | 0.00019154  |
| <i>NIBAN1</i>   | 0  | 0.00011497  |
| <i>LAMC1</i>    | 11 | 0.000039    |
| <i>SP110</i>    | 1  | 0.000141756 |
| <i>TTLL4</i>    | 1  | 0.000150204 |
| <i>DNAJB2</i>   | 4  | 0.000189005 |
| <i>TMBIM1</i>   | 0  | 0.000270069 |
| <i>ARMC9</i>    | 7  | 0.000372224 |
| <i>CAB39</i>    | 0  | 0.000297074 |
| <i>COX5B</i>    | 3  | 0.000188923 |
| <i>TSGA10</i>   | 3  | 0.0000834   |
| <i>TMEM127</i>  | 1  | 0.000256208 |
| <i>EDAR</i>     | 2  | 0.0000492   |
| <i>ANKRD36</i>  | 3  | 0.000194706 |
| <i>ISCU</i>     | 0  | 0.000187028 |
| <i>USP44</i>    | 3  | 0.0000267   |
| <i>SCYL2</i>    | 0  | 0.000311791 |
| <i>CKAP4</i>    | 0  | 0.0000563   |
| <i>PLXNC1</i>   | 0  | 0.000217668 |
| <i>APPL2</i>    | 2  | 0.000291097 |
| <i>WASHC4</i>   | 0  | 0.000201253 |
| <i>SLC41A2</i>  | 3  | 0.0000236   |
| <i>FLNB</i>     | 2  | 0.000104734 |
| <i>NEK3</i>     | 3  | 0.000131938 |
| <i>RNASEH2B</i> | 3  | 0.000309369 |
| <i>TBC1D4</i>   | 3  | 0.00013473  |
| <i>THSD1</i>    | 2  | 0.0000247   |
| <i>LMO7</i>     | 2  | 0.000242102 |
| <i>ITM2B</i>    | 0  | 0.000251206 |
| <i>EDNRB</i>    | 7  | 0.000285392 |
| <i>RCBTB2</i>   | 0  | 0.000265257 |
| <i>LCP1</i>     | 0  | 0.000236925 |
| <i>SCRN1</i>    | 2  | 0.0000508   |

|                 |    |             |
|-----------------|----|-------------|
| <i>C7orf25</i>  | 0  | 0.000133833 |
| <i>CHST12</i>   | 1  | 0.000115449 |
| <i>RAC1</i>     | 0  | 0.000228742 |
| <i>IL6</i>      | 7  | 0.0000265   |
| <i>AOAH</i>     | 0  | 0.000131514 |
| <i>BZW2</i>     | 3  | 0.000333905 |
| <i>DBNL</i>     | 0  | 0.000338318 |
| <i>CCM2</i>     | 0  | 0.00033599  |
| <i>CIDEB</i>    | 1  | 0.00013209  |
| <i>MTHFS</i>    | 0  | 0.00016018  |
| <i>ALPK3</i>    | 7  | 0.000083    |
| <i>TM6SF1</i>   | 0  | 0.000217739 |
| <i>CALCOCO2</i> | 0  | 0.0000856   |
| <i>MYCBPAP</i>  | 7  | 0.0000812   |
| <i>TEX2</i>     | 2  | 0.000302995 |
| <i>BRIP1</i>    | 14 | 0.0000914   |
| <i>RTP4</i>     | 5  | 0.000144047 |
| <i>MARCHF7</i>  | 0  | 0.000251611 |
| <i>ERMN</i>     | 2  | 0.000113818 |
| <i>SCN7A</i>    | 7  | 0.000237644 |
| <i>BLK</i>      | 11 | 0.000186469 |
| <i>HLX</i>      | 1  | 0.0000742   |
| <i>KCTD3</i>    | 3  | 0.000122702 |
| <i>IL1RN</i>    | 1  | 0.0000438   |
| <i>IL36A</i>    | 7  | 0.0000522   |
| <i>BIN1</i>     | 2  | 0.000125439 |
| <i>HS6ST1</i>   | 1  | 0.000168825 |
| <i>GYPC</i>     | 4  | 0.000193266 |
| <i>LRRC8A</i>   | 4  | 0.0000874   |
| <i>TXN</i>      | 0  | 0.000054    |
| <i>TOR1B</i>    | 5  | 0.000137893 |
| <i>C9orf78</i>  | 4  | 0.0000259   |
| <i>KLF4</i>     | 0  | 0.0000492   |

|                   |    |             |
|-------------------|----|-------------|
| <i>NIBAN2</i>     | 1  | 0.000100526 |
| <i>ST6GALNAC4</i> | 4  | 0.000104769 |
| <i>TMOD1</i>      | 4  | 0.000159389 |
| <i>DAB2IP</i>     | 7  | 0.00025976  |
| <i>STXBP1</i>     | 7  | 0.0000351   |
| <i>SLC2A8</i>     | 1  | 0.000032    |
| <i>CDK5RAP2</i>   | 2  | 0.000319735 |
| <i>ZFP37</i>      | 3  | 0.0000267   |
| <i>SLC31A2</i>    | 0  | 0.000108452 |
| <i>SLC31A1</i>    | 0  | 0.000128435 |
| <i>TLR4</i>       | 0  | 0.000152208 |
| <i>USP20</i>      | 2  | 0.000289837 |
| <i>DPM2</i>       | 4  | 0.000231071 |
| <i>HEMGN</i>      | 4  | 0.0000269   |
| <i>RPL35</i>      | 3  | 0.0000628   |
| <i>DSCC1</i>      | 14 | 0.0000587   |
| <i>MYC</i>        | 3  | 0.0000762   |
| <i>IL33</i>       | 7  | 0.0001297   |
| <i>IL11RA</i>     | 2  | 0.00014894  |
| <i>UBAP2</i>      | 4  | 0.0000432   |
| <i>TLN1</i>       | 1  | 0.000156195 |
| <i>SIT1</i>       | 3  | 0.000147665 |
| <i>SPAG8</i>      | 2  | 0.0000375   |
| <i>DCTN3</i>      | 0  | 0.000297035 |
| <i>CD72</i>       | 11 | 0.0000755   |
| <i>GRHPR</i>      | 3  | 0.0000864   |
| <i>ALDH1B1</i>    | 3  | 0.000101501 |
| <i>ARHGEF39</i>   | 7  | 0.000321398 |
| <i>CNPY3</i>      | 1  | 0.000188006 |
| <i>FOXP4</i>      | 1  | 0.0000625   |
| <i>KIF13A</i>     | 0  | 0.000213596 |
| <i>ZSCAN9</i>     | 3  | 0.000197556 |
| <i>PIM1</i>       | 4  | 0.000106396 |

|                 |    |             |
|-----------------|----|-------------|
| <i>GMPR</i>     | 4  | 0.000211392 |
| <i>TMEM63B</i>  | 4  | 0.000176267 |
| <i>FRS3</i>     | 1  | 0.0000944   |
| <i>CAPN11</i>   | 7  | 0.000180998 |
| <i>KIAA0319</i> | 1  | 0.0000236   |
| <i>IRF4</i>     | 2  | 0.0000404   |
| <i>LRRC1</i>    | 3  | 0.0000371   |
| <i>BPHL</i>     | 2  | 0.000228714 |
| <i>UQCC2</i>    | 3  | 0.000272328 |
| <i>FLOT1</i>    | 0  | 0.000128443 |
| <i>MDC1</i>     | 2  | 0.000238139 |
| <i>PGBD1</i>    | 3  | 0.0000464   |
| <i>RNF144B</i>  | 0  | 0.000177206 |
| <i>VARs2</i>    | 1  | 0.0000769   |
| <i>TAF8</i>     | 2  | 0.000239841 |
| <i>FAM8A1</i>   | 0  | 0.000134414 |
| <i>FGFBP1</i>   | 7  | 0.000167886 |
| <i>FGFBP2</i>   | 3  | 0.0000584   |
| <i>TLR2</i>     | 0  | 0.0000858   |
| <i>MYO7A</i>    | 7  | 0.000244696 |
| <i>FCHSD2</i>   | 2  | 0.00019601  |
| <i>SYTL2</i>    | 3  | 0.0000814   |
| <i>RAB30</i>    | 11 | 0.000174161 |
| <i>LRRC32</i>   | 7  | 0.000248871 |
| <i>NARS2</i>    | 3  | 0.000312872 |
| <i>GGH</i>      | 14 | 0.0000272   |
| <i>SLCO5A1</i>  | 7  | 0.000275237 |
| <i>SDCBP</i>    | 0  | 0.000209998 |
| <i>DDX60</i>    | 5  | 0.000175317 |
| <i>SORL1</i>    | 0  | 0.000192452 |
| <i>RDX</i>      | 3  | 0.000273309 |
| <i>C11orf1</i>  | 3  | 0.0000728   |
| <i>FXYD6</i>    | 7  | 0.000115607 |

|                 |    |             |
|-----------------|----|-------------|
| <i>ARHGAP20</i> | 7  | 0.0000367   |
| <i>CASP1</i>    | 0  | 0.000145802 |
| <i>CASP5</i>    | 5  | 0.0000474   |
| <i>SQOR</i>     | 0  | 0.000212846 |
| <i>NUSAP1</i>   | 14 | 0.000214724 |
| <i>KNL1</i>     | 14 | 0.00016017  |
| <i>RTF1</i>     | 0  | 0.000315684 |
| <i>PARP6</i>    | 2  | 0.000296253 |
| <i>RPLP1</i>    | 3  | 0.0000301   |
| <i>PAQR5</i>    | 7  | 0.000259276 |
| <i>PAK6</i>     | 7  | 0.000291967 |
| <i>SPTBN5</i>   | 7  | 0.0000506   |
| <i>GCOM1</i>    | 29 | 0.000154847 |
| <i>TTLL7</i>    | 8  | 0.00010787  |
| <i>IFI44L</i>   | 5  | 0.000151966 |
| <i>GIPC2</i>    | 7  | 0.000173267 |
| <i>IFI44</i>    | 5  | 0.00015709  |
| <i>IFT172</i>   | 2  | 0.000217981 |
| <i>SLC5A6</i>   | 2  | 0.000204956 |
| <i>PREPL</i>    | 3  | 0.000334749 |
| <i>CENPO</i>    | 2  | 0.000177098 |
| <i>DTNB</i>     | 2  | 0.000226841 |
| <i>ACTR1A</i>   | 0  | 0.000350568 |
| <i>MFSD13A</i>  | 1  | 0.0000429   |
| <i>CYP2C8</i>   | 7  | 0.0000662   |
| <i>MYOF</i>     | 2  | 0.000026    |
| <i>STAMBPL1</i> | 3  | 0.000239055 |
| <i>KIF11</i>    | 14 | 0.000241167 |
| <i>CUZD1</i>    | 3  | 0.000100171 |
| <i>CALHM2</i>   | 1  | 0.0000886   |
| <i>ARL3</i>     | 0  | 0.0000928   |
| <i>CEP55</i>    | 14 | 0.000189317 |
| <i>KIF20B</i>   | 3  | 0.000092    |

|                 |    |             |
|-----------------|----|-------------|
| <i>ENTPD1</i>   | 0  | 0.000217445 |
| <i>ZNF365</i>   | 3  | 0.0000303   |
| <i>OIT3</i>     | 7  | 0.000123605 |
| <i>ADAMTS14</i> | 7  | 0.000258487 |
| <i>TET1</i>     | 3  | 0.000144079 |
| <i>DNA2</i>     | 3  | 0.0000489   |
| <i>ATIC</i>     | 2  | 0.000269765 |
| <i>MSTN</i>     | 7  | 0.000115015 |
| <i>CDK15</i>    | 7  | 0.0000316   |
| <i>HECW2</i>    | 0  | 0.0000282   |
| <i>CIR1</i>     | 0  | 0.00020036  |
| <i>ITPRID2</i>  | 0  | 0.000263089 |
| <i>FAM117B</i>  | 2  | 0.000135538 |
| <i>ABI2</i>     | 2  | 0.000265018 |
| <i>SLC40A1</i>  | 0  | 0.000092    |
| <i>SLC49A4</i>  | 0  | 0.000171809 |
| <i>COX17</i>    | 3  | 0.000320591 |
| <i>PARP9</i>    | 5  | 0.000154227 |
| <i>GLCE</i>     | 3  | 0.000295975 |
| <i>APH1B</i>    | 0  | 0.000340031 |
| <i>CILP</i>     | 7  | 0.0000311   |
| <i>PARP16</i>   | 2  | 0.0000903   |
| <i>PPCDC</i>    | 1  | 0.000209898 |
| <i>SEMA7A</i>   | 13 | 0.0000953   |
| <i>UBL7</i>     | 4  | 0.000130315 |
| <i>ARHGAP24</i> | 11 | 0.0000329   |
| <i>HERC6</i>    | 5  | 0.000173138 |
| <i>HERC5</i>    | 5  | 0.000161659 |
| <i>HNRNPD</i>   | 3  | 0.000391338 |
| <i>GPAT3</i>    | 0  | 0.000122595 |
| <i>MMRN1</i>    | 4  | 0.000125656 |
| <i>PDE5A</i>    | 4  | 0.000240644 |
| <i>SEPTIN11</i> | 2  | 0.000238557 |

|                  |    |             |
|------------------|----|-------------|
| <i>CCNG2</i>     | 0  | 0.000198039 |
| <i>CDKL2</i>     | 7  | 0.000290118 |
| <i>ANXA3</i>     | 0  | 0.0000239   |
| <i>CENPE</i>     | 14 | 0.000184043 |
| <i>LEF1</i>      | 2  | 0.0000939   |
| <i>HADH</i>      | 2  | 0.000314379 |
| <i>EGF</i>       | 4  | 0.000192229 |
| <i>PAPSS1</i>    | 0  | 0.0000235   |
| <i>MAPK8IP3</i>  | 1  | 0.00024777  |
| <i>RGS3</i>      | 1  | 0.000136916 |
| <i>GUCD1</i>     | 4  | 0.000252228 |
| <i>ERP27</i>     | 2  | 0.000180839 |
| <i>GABARAPL1</i> | 0  | 0.000196542 |
| <i>KIF21A</i>    | 3  | 0.000143574 |
| <i>FGD4</i>      | 0  | 0.000149509 |
| <i>ETFBKMT</i>   | 3  | 0.0000244   |
| <i>PRICKLE1</i>  | 11 | 0.0000558   |
| <i>C1RL</i>      | 1  | 0.000235388 |
| <i>CLSTN3</i>    | 1  | 0.0000579   |
| <i>KLRG1</i>     | 3  | 0.000062    |
| <i>VAMP1</i>     | 2  | 0.000179842 |
| <i>CD27</i>      | 2  | 0.0000691   |
| <i>RBP5</i>      | 7  | 0.000198014 |
| <i>PEX5</i>      | 2  | 0.000333372 |
| <i>AMIGO2</i>    | 3  | 0.000204674 |
| <i>GLIPR1</i>    | 0  | 0.000169491 |
| <i>DUSP6</i>     | 0  | 0.0000446   |
| <i>POC1B</i>     | 3  | 0.000127094 |
| <i>SLC15A4</i>   | 0  | 0.000238519 |
| <i>RITA1</i>     | 3  | 0.000223146 |
| <i>GLTP</i>      | 0  | 0.000197307 |
| <i>TCHP</i>      | 2  | 0.000419767 |
| <i>FAM222A</i>   | 7  | 0.00029401  |

|                  |    |             |
|------------------|----|-------------|
| <i>NUP58</i>     | 0  | 0.00028237  |
| <i>MTMR6</i>     | 0  | 0.000239759 |
| <i>SLC7A1</i>    | 2  | 0.000109848 |
| <i>LNK2</i>      | 3  | 0.000301568 |
| <i>TARBP2</i>    | 3  | 0.000195019 |
| <i>RDH16</i>     | 2  | 0.0000416   |
| <i>BRCA2</i>     | 3  | 0.0000429   |
| <i>ITGB7</i>     | 3  | 0.000104389 |
| <i>GALNT6</i>    | 0  | 0.0000236   |
| <i>CSAD</i>      | 1  | 0.00019803  |
| <i>C12orf10</i>  | 3  | 0.000107942 |
| <i>TMBIM6</i>    | 0  | 0.000340102 |
| <i>SMIM2</i>     | 7  | 0.000197914 |
| <i>HNRNPA1L2</i> | 3  | 0.0000653   |
| <i>VPS33A</i>    | 3  | 0.000403173 |
| <i>RHOF</i>      | 1  | 0.000162756 |
| <i>DIAPH3</i>    | 30 | 0.000154847 |
| <i>SLAIN1</i>    | 3  | 0.000261094 |
| <i>GRTP1</i>     | 7  | 0.000146976 |
| <i>CUL4A</i>     | 3  | 0.000283894 |
| <i>CDH24</i>     | 7  | 0.000239633 |
| <i>REM2</i>      | 1  | 0.0000949   |
| <i>PELI2</i>     | 0  | 0.000260416 |
| <i>RTN1</i>      | 1  | 0.0000247   |
| <i>SLC38A6</i>   | 3  | 0.000236223 |
| <i>DCAF5</i>     | 2  | 0.00037589  |
| <i>ESR2</i>      | 7  | 0.000120913 |
| <i>STON2</i>     | 4  | 0.000144158 |
| <i>EFCAB11</i>   | 2  | 0.0000577   |
| <i>JDP2</i>      | 0  | 0.000194077 |
| <i>AK7</i>       | 7  | 0.000299385 |
| <i>CLBA1</i>     | 7  | 0.0000316   |
| <i>WARS1</i>     | 5  | 0.000036    |

|                 |    |             |
|-----------------|----|-------------|
| <i>NIPA2</i>    | 3  | 0.000447905 |
| <i>DUOXA1</i>   | 7  | 0.000222021 |
| <i>SORD</i>     | 13 | 0.000179039 |
| <i>SERF2</i>    | 4  | 0.000103539 |
| <i>ZSCAN29</i>  | 3  | 0.000386463 |
| <i>LYSMD2</i>   | 0  | 0.0000888   |
| <i>SLC27A2</i>  | 14 | 0.0000506   |
| <i>HDC</i>      | 23 | 0.000289051 |
| <i>BAHD1</i>    | 2  | 0.000253371 |
| <i>CDAN1</i>    | 1  | 0.000321078 |
| <i>TLE3</i>     | 1  | 0.000210568 |
| <i>ANP32A</i>   | 0  | 0.000247346 |
| <i>PSTPIP1</i>  | 1  | 0.000258851 |
| <i>BCL2A1</i>   | 3  | 0.0000541   |
| <i>SCAPER</i>   | 3  | 0.000264747 |
| <i>TSPAN3</i>   | 3  | 0.0000974   |
| <i>MAN2C1</i>   | 1  | 0.0000432   |
| <i>DNAJA4</i>   | 4  | 0.000125974 |
| <i>TPM1</i>     | 4  | 0.0000474   |
| <i>IGF1R</i>    | 1  | 0.000146039 |
| <i>CYP1A1</i>   | 7  | 0.000240747 |
| <i>ADAMTS17</i> | 2  | 0.0000363   |
| <i>LINS1</i>    | 3  | 0.00027275  |
| <i>PCSK6</i>    | 4  | 0.000239602 |
| <i>HAPLN3</i>   | 2  | 0.0000542   |
| <i>ABHD2</i>    | 1  | 0.000154929 |
| <i>DET1</i>     | 2  | 0.000201907 |
| <i>MFGE8</i>    | 2  | 0.0000925   |
| <i>ZNF710</i>   | 1  | 0.000195456 |
| <i>MCTP2</i>    | 0  | 0.000165201 |
| <i>IQGAP1</i>   | 0  | 0.000196071 |
| <i>CRTC3</i>    | 2  | 0.000296756 |
| <i>GLYR1</i>    | 0  | 0.000429892 |

|                 |   |             |
|-----------------|---|-------------|
| <i>PMM2</i>     | 2 | 0.00019381  |
| <i>ITGAX</i>    | 1 | 0.000107601 |
| <i>FTO</i>      | 2 | 0.000248149 |
| <i>CDR2</i>     | 3 | 0.000193206 |
| <i>IGSF6</i>    | 0 | 0.000160988 |
| <i>ARHGAP17</i> | 2 | 0.000161229 |
| <i>MYLK3</i>    | 7 | 0.000311682 |
| <i>NKD1</i>     | 7 | 0.000100131 |
| <i>DHX38</i>    | 2 | 0.000335469 |
| <i>ZFHX3</i>    | 1 | 0.0000609   |
| <i>CPNE2</i>    | 1 | 0.0000768   |
| <i>NLRC5</i>    | 1 | 0.000121502 |
| <i>KATNB1</i>   | 1 | 0.000232943 |
| <i>CMTM3</i>    | 0 | 0.00019324  |
| <i>CMTM2</i>    | 0 | 0.0000447   |
| <i>MAP1LC3B</i> | 0 | 0.000158162 |
| <i>MBTPS1</i>   | 2 | 0.000441144 |
| <i>MEAK7</i>    | 2 | 0.00023614  |
| <i>IRF8</i>     | 3 | 0.0000815   |
| <i>RPS2</i>     | 3 | 0.000130227 |
| <i>DEF8</i>     | 1 | 0.000260324 |
| <i>TCF25</i>    | 1 | 0.000248602 |
| <i>GAS8</i>     | 2 | 0.0000324   |
| <i>GID4</i>     | 4 | 0.0001303   |
| <i>KSR1</i>     | 1 | 0.000135371 |
| <i>UTP4</i>     | 2 | 0.000308589 |
| <i>RANBP10</i>  | 4 | 0.000193975 |
| <i>CTRL</i>     | 1 | 0.0000272   |
| <i>DPEP3</i>    | 1 | 0.0000689   |
| <i>GFOD2</i>    | 4 | 0.0000715   |
| <i>NOB1</i>     | 2 | 0.000116759 |
| <i>PCTP</i>     | 0 | 0.0000424   |
| <i>TOB1</i>     | 3 | 0.00020152  |

|                 |   |             |
|-----------------|---|-------------|
| <i>SPATA22</i>  | 7 | 0.000108566 |
| <i>NPEPPS</i>   | 0 | 0.000276995 |
| <i>SKAP1</i>    | 2 | 0.000188666 |
| <i>LRRC46</i>   | 7 | 0.000150051 |
| <i>SSH2</i>     | 1 | 0.000176728 |
| <i>BCAS3</i>    | 2 | 0.000282491 |
| <i>TAF4B</i>    | 3 | 0.00020242  |
| <i>PRELID3A</i> | 7 | 0.00028225  |
| <i>IMPA2</i>    | 0 | 0.000139659 |
| <i>GALNT1</i>   | 3 | 0.000180295 |
| <i>MEP1B</i>    | 7 | 0.000284537 |
| <i>OSBPL1A</i>  | 0 | 0.0000504   |
| <i>GATA6</i>    | 7 | 0.000190988 |
| <i>SLC14A1</i>  | 4 | 0.000105873 |
| <i>ARRB2</i>    | 1 | 0.00021464  |
| <i>ASGR1</i>    | 0 | 0.0000352   |
| <i>SLC16A3</i>  | 0 | 0.000152199 |
| <i>ANAPC11</i>  | 3 | 0.000202907 |
| <i>FN3KRP</i>   | 2 | 0.000257834 |
| <i>NARF</i>     | 1 | 0.000220908 |
| <i>CBX8</i>     | 1 | 0.0000322   |
| <i>SECTM1</i>   | 1 | 0.0000338   |
| <i>RNF157</i>   | 2 | 0.000071    |
| <i>CEP131</i>   | 1 | 0.000109748 |
| <i>DYM</i>      | 2 | 0.000423244 |
| <i>ZCCHC2</i>   | 5 | 0.000148331 |
| <i>FBXO15</i>   | 7 | 0.000238422 |
| <i>PMAIP1</i>   | 3 | 0.0000462   |
| <i>P3H4</i>     | 2 | 0.0000988   |
| <i>ERBB2</i>    | 3 | 0.0000306   |
| <i>GRB7</i>     | 7 | 0.000243093 |
| <i>MIEN1</i>    | 1 | 0.000048    |
| <i>SLC39A3</i>  | 3 | 0.0000842   |

|                 |    |             |
|-----------------|----|-------------|
| <i>TPGS1</i>    | 3  | 0.000162678 |
| <i>PRDM15</i>   | 2  | 0.000252143 |
| <i>FEM1A</i>    | 0  | 0.000153596 |
| <i>VAV1</i>     | 0  | 0.000304815 |
| <i>DMRTC2</i>   | 7  | 0.0002262   |
| <i>TMEM91</i>   | 0  | 0.000117808 |
| <i>PGGHG</i>    | 1  | 0.000128536 |
| <i>COL6A1</i>   | 7  | 0.000202524 |
| <i>IFNAR1</i>   | 0  | 0.000236313 |
| <i>TRPM2</i>    | 1  | 0.0000811   |
| <i>SCYL1</i>    | 1  | 0.000242636 |
| <i>URB1</i>     | 2  | 0.000273993 |
| <i>AKT1</i>     | 1  | 0.000274567 |
| <i>EMP3</i>     | 3  | 0.000137999 |
| <i>LMTK3</i>    | 7  | 0.000102812 |
| <i>ADAMTS10</i> | 1  | 0.0000266   |
| <i>MYO1F</i>    | 1  | 0.00021893  |
| <i>NLRP12</i>   | 0  | 0.000179496 |
| <i>CACNG8</i>   | 7  | 0.0000791   |
| <i>ZNF787</i>   | 0  | 0.000106413 |
| <i>CARM1</i>    | 4  | 0.000124714 |
| <i>ZNF473</i>   | 3  | 0.000360691 |
| <i>RPS11</i>    | 3  | 0.000128645 |
| <i>CTU1</i>     | 3  | 0.0000883   |
| <i>NOSIP</i>    | 3  | 0.000199476 |
| <i>RCN3</i>     | 1  | 0.0000788   |
| <i>SLC2A5</i>   | 10 | 0.000165057 |
| <i>MMEL1</i>    | 7  | 0.0000442   |
| <i>EPHA2</i>    | 7  | 0.000283852 |
| <i>EFHD2</i>    | 1  | 0.000172766 |
| <i>PEX14</i>    | 2  | 0.000219928 |
| <i>PGD</i>      | 0  | 0.000138697 |
| <i>C1orf216</i> | 3  | 0.000150722 |

|                  |    |             |
|------------------|----|-------------|
| <i>EVA1B</i>     | 0  | 0.0000279   |
| <i>PLK4</i>      | 14 | 0.000174365 |
| <i>MAP3K6</i>    | 1  | 0.0000238   |
| <i>FCN3</i>      | 7  | 0.000180294 |
| <i>ITGB3BP</i>   | 3  | 0.000112956 |
| <i>BCL10</i>     | 0  | 0.000325225 |
| <i>KIF2C</i>     | 14 | 0.000173619 |
| <i>PTPRF</i>     | 7  | 0.000206081 |
| <i>LMO4</i>      | 0  | 0.000399037 |
| <i>SLC44A3</i>   | 7  | 0.000144738 |
| <i>ZNF697</i>    | 0  | 0.0000283   |
| <i>CTTNBP2NL</i> | 2  | 0.0000562   |
| <i>C1orf162</i>  | 0  | 0.0000956   |
| <i>PROK1</i>     | 7  | 0.000250174 |
| <i>ALDH9A1</i>   | 0  | 0.000305712 |
| <i>NME7</i>      | 3  | 0.000191326 |
| <i>POGK</i>      | 2  | 0.000443174 |
| <i>CREG1</i>     | 4  | 0.0000892   |
| <i>DCAF6</i>     | 2  | 0.000186763 |
| <i>GPA33</i>     | 2  | 0.0000534   |
| <i>MAEL</i>      | 7  | 0.000284523 |
| <i>ADCY10</i>    | 7  | 0.000103472 |
| <i>PPOX</i>      | 3  | 0.000183729 |
| <i>FCGR2A</i>    | 0  | 0.000109166 |
| <i>NUF2</i>      | 14 | 0.000134211 |
| <i>RGS5</i>      | 7  | 0.0000491   |
| <i>PRCC</i>      | 2  | 0.000350458 |
| <i>FCRL5</i>     | 11 | 0.0000286   |
| <i>CRABP2</i>    | 7  | 0.0000324   |
| <i>HDGF</i>      | 4  | 0.000213605 |
| <i>RGS16</i>     | 7  | 0.0000294   |
| <i>PRUNE1</i>    | 0  | 0.000136702 |
| <i>RORC</i>      | 16 | 0.000154847 |

|                 |    |             |
|-----------------|----|-------------|
| <i>TUFT1</i>    | 0  | 0.000025    |
| <i>SF3B4</i>    | 1  | 0.000238758 |
| <i>SNX27</i>    | 1  | 0.000217158 |
| <i>MCL1</i>     | 0  | 0.000285685 |
| <i>CTSK</i>     | 2  | 0.000100861 |
| <i>MINDY1</i>   | 1  | 0.000209061 |
| <i>SELENBP1</i> | 4  | 0.000199119 |
| <i>CERS2</i>    | 0  | 0.000312415 |
| <i>SEMA6C</i>   | 7  | 0.000242144 |
| <i>ARNT</i>     | 2  | 0.000353994 |
| <i>GABPB2</i>   | 2  | 0.000296086 |
| <i>DTL</i>      | 14 | 0.000194726 |
| <i>DYRK3</i>    | 4  | 0.0000782   |
| <i>HHIPL2</i>   | 7  | 0.000290717 |
| <i>ATP8B2</i>   | 2  | 0.000232154 |
| <i>ADAM15</i>   | 1  | 0.0000658   |
| <i>JTB</i>      | 3  | 0.0000748   |
| <i>S100A8</i>   | 3  | 0.0000505   |
| <i>TPM3</i>     | 0  | 0.000313804 |
| <i>SNAPIN</i>   | 3  | 0.000298614 |
| <i>S100A7</i>   | 7  | 0.000146253 |
| <i>SLC39A1</i>  | 3  | 0.0000954   |
| <i>CREB3L4</i>  | 3  | 0.0000982   |
| <i>EFNA3</i>    | 7  | 0.000083    |
| <i>RIT1</i>     | 0  | 0.000228053 |
| <i>INTS3</i>    | 1  | 0.000274503 |
| <i>ACTA1</i>    | 7  | 0.0000628   |
| <i>SCCPDH</i>   | 3  | 0.0000609   |
| <i>SNAP47</i>   | 3  | 0.000393915 |
| <i>DEGS1</i>    | 0  | 0.000285428 |
| <i>ARF1</i>     | 1  | 0.000167937 |
| <i>CNIH4</i>    | 0  | 0.00013213  |
| <i>ITPKB</i>    | 2  | 0.000267663 |

|                 |    |             |
|-----------------|----|-------------|
| <i>GUK1</i>     | 4  | 0.000178524 |
| <i>MBOAT2</i>   | 0  | 0.0000802   |
| <i>PARP1</i>    | 3  | 0.000216991 |
| <i>PSEN2</i>    | 2  | 0.0000248   |
| <i>PYCR2</i>    | 2  | 0.000186021 |
| <i>LBR</i>      | 0  | 0.000197961 |
| <i>EPHX1</i>    | 7  | 0.0000447   |
| <i>PPFIA4</i>   | 7  | 0.0000539   |
| <i>PLEKHA6</i>  | 7  | 0.000363798 |
| <i>PTPN7</i>    | 1  | 0.000130257 |
| <i>RHOB</i>     | 0  | 0.0000571   |
| <i>GALM</i>     | 3  | 0.0000362   |
| <i>CAMKMT</i>   | 2  | 0.000255403 |
| <i>EML4</i>     | 3  | 0.000357789 |
| <i>WDPCP</i>    | 2  | 0.000273545 |
| <i>ZNF514</i>   | 3  | 0.000205022 |
| <i>ANKRD53</i>  | 7  | 0.000286396 |
| <i>EXOC6B</i>   | 2  | 0.000300633 |
| <i>SFXN5</i>    | 1  | 0.000237455 |
| <i>DQX1</i>     | 7  | 0.0000278   |
| <i>RALB</i>     | 0  | 0.000204966 |
| <i>TMEM177</i>  | 2  | 0.000214265 |
| <i>FBLN7</i>    | 2  | 0.0000458   |
| <i>ZC3H8</i>    | 3  | 0.000338915 |
| <i>FAHD2B</i>   | 2  | 0.0000876   |
| <i>LYG1</i>     | 2  | 0.0000235   |
| <i>AFF3</i>     | 11 | 0.000160397 |
| <i>SPOPL</i>    | 0  | 0.000175453 |
| <i>GPR17</i>    | 7  | 0.000075    |
| <i>AMMECR1L</i> | 2  | 0.000367525 |
| <i>PKP4</i>     | 0  | 0.000079    |
| <i>CDCA7</i>    | 14 | 0.000187045 |
| <i>PHOSPHO2</i> | 3  | 0.00017341  |

|                 |    |             |
|-----------------|----|-------------|
| <i>CCDC150</i>  | 7  | 0.000325668 |
| <i>CPO</i>      | 7  | 0.000145866 |
| <i>NYAP2</i>    | 7  | 0.0000972   |
| <i>RHBDD1</i>   | 3  | 0.000175727 |
| <i>ANKMY1</i>   | 2  | 0.000285195 |
| <i>COPS7B</i>   | 2  | 0.00027743  |
| <i>FANCD2</i>   | 3  | 0.000309067 |
| <i>TAMM41</i>   | 2  | 0.000153681 |
| <i>VGLL4</i>    | 2  | 0.000319163 |
| <i>RAB5A</i>    | 0  | 0.000296298 |
| <i>RETREG2</i>  | 4  | 0.000125067 |
| <i>STK11IP</i>  | 1  | 0.000257712 |
| <i>GMPPA</i>    | 1  | 0.00021124  |
| <i>DYNC1LI1</i> | 0  | 0.000199659 |
| <i>RBMS3</i>    | 7  | 0.000278793 |
| <i>OSBPL10</i>  | 11 | 0.000145918 |
| <i>POMGNT2</i>  | 4  | 0.0000281   |
| <i>ACKR2</i>    | 7  | 0.000169537 |
| <i>GASK1A</i>   | 7  | 0.000297546 |
| <i>CSRNP1</i>   | 0  | 0.0000347   |
| <i>SLC25A38</i> | 3  | 0.000149538 |
| <i>ITGA9</i>    | 10 | 0.0000422   |
| <i>CTDSPL</i>   | 4  | 0.000232797 |
| <i>STAC</i>     | 7  | 0.000187189 |
| <i>TMF1</i>     | 3  | 0.000280879 |
| <i>LRTM1</i>    | 7  | 0.000247964 |
| <i>LIMD1</i>    | 2  | 0.000219511 |
| <i>NFKBIZ</i>   | 0  | 0.000216386 |
| <i>PHLDB2</i>   | 2  | 0.0000712   |
| <i>ADPRH</i>    | 0  | 0.0000661   |
| <i>IGSF11</i>   | 7  | 0.0000493   |
| <i>NR1I2</i>    | 7  | 0.000311902 |
| <i>UCN2</i>     | 7  | 0.000127052 |

|                 |    |             |
|-----------------|----|-------------|
| <i>DCAF1</i>    | 2  | 0.000352595 |
| <i>ILDR1</i>    | 7  | 0.000194453 |
| <i>DGKQ</i>     | 1  | 0.0000369   |
| <i>CORIN</i>    | 31 | 0.000154847 |
| <i>OCIAD2</i>   | 3  | 0.000188877 |
| <i>SLC10A4</i>  | 7  | 0.000190605 |
| <i>SLC10A6</i>  | 7  | 0.000215087 |
| <i>KLHL8</i>    | 0  | 0.000192253 |
| <i>SNCA</i>     | 4  | 0.000150421 |
| <i>TBCK</i>     | 3  | 0.000279843 |
| <i>CISD2</i>    | 4  | 0.000123391 |
| <i>FABP2</i>    | 7  | 0.0000456   |
| <i>CCNA2</i>    | 14 | 0.000215386 |
| <i>SETD7</i>    | 0  | 0.00030383  |
| <i>NAF1</i>     | 3  | 0.000278469 |
| <i>MARCHF1</i>  | 3  | 0.000139625 |
| <i>PDGFC</i>    | 0  | 0.0000236   |
| <i>CYP4V2</i>   | 2  | 0.000159837 |
| <i>ROPN1L</i>   | 0  | 0.000116325 |
| <i>SRD5A1</i>   | 2  | 0.000195121 |
| <i>MYO10</i>    | 7  | 0.000136608 |
| <i>RPL37</i>    | 3  | 0.0000694   |
| <i>GZMA</i>     | 14 | 0.000049    |
| <i>LHFPL2</i>   | 5  | 0.0000469   |
| <i>IQGAP2</i>   | 0  | 0.000188693 |
| <i>BTF3</i>     | 3  | 0.0000612   |
| <i>FEM1C</i>    | 0  | 0.00022438  |
| <i>ARHGAP26</i> | 0  | 0.00017238  |
| <i>TIMD4</i>    | 2  | 0.0000245   |
| <i>PCYOX1L</i>  | 2  | 0.000269165 |
| <i>TNIP1</i>    | 1  | 0.000268543 |
| <i>N4BP3</i>    | 1  | 0.0000409   |
| <i>NHP2</i>     | 3  | 0.000220866 |

|                 |   |             |
|-----------------|---|-------------|
| <i>TBC1D7</i>   | 2 | 0.0000476   |
| <i>FARS2</i>    | 2 | 0.000292939 |
| <i>GFOD1</i>    | 2 | 0.0000314   |
| <i>LRRTM2</i>   | 7 | 0.00027005  |
| <i>ZMAT2</i>    | 4 | 0.0000378   |
| <i>KLHL3</i>    | 2 | 0.000166806 |
| <i>HIGD2A</i>   | 3 | 0.0000469   |
| <i>MMUT</i>     | 3 | 0.000231995 |
| <i>DOK3</i>     | 1 | 0.000153229 |
| <i>ABT1</i>     | 3 | 0.000313267 |
| <i>PPP1R18</i>  | 1 | 0.00015128  |
| <i>TCTE1</i>    | 7 | 0.000202636 |
| <i>IRAK1BP1</i> | 3 | 0.0000628   |
| <i>PNRC1</i>    | 0 | 0.0001114   |
| <i>SCML4</i>    | 2 | 0.000229335 |
| <i>TBC1D32</i>  | 3 | 0.000225329 |
| <i>SLC18B1</i>  | 3 | 0.000125185 |
| <i>SLC2A12</i>  | 7 | 0.0000994   |
| <i>SHPRH</i>    | 3 | 0.000331788 |
| <i>AIG1</i>     | 0 | 0.000132733 |
| <i>TMEM181</i>  | 2 | 0.000267738 |
| <i>VIP</i>      | 7 | 0.0000245   |
| <i>ARMT1</i>    | 3 | 0.000201074 |
| <i>GNA12</i>    | 4 | 0.0000279   |
| <i>CCZ1B</i>    | 3 | 0.0000302   |
| <i>CREB5</i>    | 0 | 0.000073    |
| <i>PURB</i>     | 3 | 0.000302579 |
| <i>ATXN7L1</i>  | 2 | 0.000264686 |
| <i>SLC12A9</i>  | 1 | 0.000216018 |
| <i>AGBL3</i>    | 3 | 0.000120292 |
| <i>TMEM140</i>  | 0 | 0.000111654 |
| <i>EPHA1</i>    | 2 | 0.0000414   |
| <i>NLGN4X</i>   | 7 | 0.000199757 |

|                 |    |             |
|-----------------|----|-------------|
| <i>SHROOM2</i>  | 7  | 0.000133611 |
| <i>SYTL5</i>    | 7  | 0.0000311   |
| <i>CASK</i>     | 3  | 0.000282298 |
| <i>KDM6A</i>    | 2  | 0.0000542   |
| <i>MSN</i>      | 1  | 0.000215551 |
| <i>CHST7</i>    | 0  | 0.0000236   |
| <i>NDUFB11</i>  | 3  | 0.000161665 |
| <i>CCDC120</i>  | 1  | 0.000107235 |
| <i>OGT</i>      | 2  | 0.000334763 |
| <i>ITGB1BP2</i> | 2  | 0.0000459   |
| <i>IL2RG</i>    | 2  | 0.0000243   |
| <i>GCNA</i>     | 2  | 0.000227183 |
| <i>DIAPH2</i>   | 3  | 0.000297307 |
| <i>FRMPD3</i>   | 3  | 0.000125149 |
| <i>DOCK11</i>   | 0  | 0.000354193 |
| <i>GPC3</i>     | 7  | 0.000110021 |
| <i>MFHAS1</i>   | 2  | 0.0000538   |
| <i>FBXO25</i>   | 2  | 0.000351121 |
| <i>NSDHL</i>    | 3  | 0.000223003 |
| <i>RPL10</i>    | 3  | 0.000117127 |
| <i>ATP6V1B2</i> | 0  | 0.000284741 |
| <i>HMBOX1</i>   | 2  | 0.000280945 |
| <i>CHRNA6</i>   | 7  | 0.000229929 |
| <i>GNRH1</i>    | 2  | 0.000252676 |
| <i>BIN3</i>     | 1  | 0.000352687 |
| <i>DOK2</i>     | 3  | 0.000126791 |
| <i>SLC25A37</i> | 4  | 0.000270193 |
| <i>CHMP7</i>    | 3  | 0.000219716 |
| <i>DOCK5</i>    | 0  | 0.000177579 |
| <i>STAR</i>     | 7  | 0.000260725 |
| <i>TACC1</i>    | 0  | 0.000341987 |
| <i>PLPP5</i>    | 11 | 0.000102789 |
| <i>GIN54</i>    | 14 | 0.00005     |

|                 |    |             |
|-----------------|----|-------------|
| <i>SLC26A7</i>  | 7  | 0.000125847 |
| <i>SYBU</i>     | 7  | 0.000241818 |
| <i>MAL2</i>     | 7  | 0.000270425 |
| <i>FAM83A</i>   | 7  | 0.0000697   |
| <i>GSDMC</i>    | 7  | 0.000262121 |
| <i>SLC39A4</i>  | 7  | 0.0000346   |
| <i>NAPRT</i>    | 0  | 0.0000371   |
| <i>NFIB</i>     | 7  | 0.00023854  |
| <i>PLIN2</i>    | 3  | 0.0000999   |
| <i>CBWD5</i>    | 0  | 0.000133437 |
| <i>CEP78</i>    | 3  | 0.000109201 |
| <i>IDNK</i>     | 3  | 0.000298759 |
| <i>MFSD14B</i>  | 0  | 0.0000948   |
| <i>SNX30</i>    | 0  | 0.000336994 |
| <i>STOM</i>     | 4  | 0.000102431 |
| <i>GSN</i>      | 1  | 0.0000736   |
| <i>MRRF</i>     | 2  | 0.000365519 |
| <i>NR6A1</i>    | 1  | 0.000116325 |
| <i>ALAD</i>     | 0  | 0.000247879 |
| <i>WDR31</i>    | 7  | 0.000122033 |
| <i>GBGT1</i>    | 1  | 0.0000826   |
| <i>SURF1</i>    | 3  | 0.000335712 |
| <i>MED22</i>    | 1  | 0.000288561 |
| <i>SH3GLB2</i>  | 4  | 0.0000625   |
| <i>MIGA2</i>    | 1  | 0.000295293 |
| <i>LCN2</i>     | 10 | 0.000155412 |
| <i>SEC16A</i>   | 1  | 0.000224245 |
| <i>NACC2</i>    | 1  | 0.000200486 |
| <i>PROSER2</i>  | 7  | 0.0000494   |
| <i>USP6NL</i>   | 3  | 0.000163898 |
| <i>MSRB2</i>    | 0  | 0.0000585   |
| <i>FAM171A1</i> | 2  | 0.0000335   |
| <i>RSU1</i>     | 0  | 0.0000334   |

|                 |    |             |
|-----------------|----|-------------|
| <i>ST8SIA6</i>  | 3  | 0.0000431   |
| <i>PARD3</i>    | 4  | 0.000162551 |
| <i>ZEB1</i>     | 3  | 0.000308554 |
| <i>NRBF2</i>    | 0  | 0.000172234 |
| <i>CDHR1</i>    | 7  | 0.0000365   |
| <i>LRMDA</i>    | 2  | 0.0000252   |
| <i>CAMK2G</i>   | 1  | 0.000277136 |
| <i>ADIRF</i>    | 7  | 0.0000696   |
| <i>DNAJB12</i>  | 1  | 0.000392957 |
| <i>TCF7L2</i>   | 2  | 0.0000335   |
| <i>MKI67</i>    | 14 | 0.000151294 |
| <i>FUOM</i>     | 3  | 0.0000904   |
| <i>LRRC27</i>   | 2  | 0.0000784   |
| <i>TAF5</i>     | 3  | 0.000350002 |
| <i>PPRC1</i>    | 1  | 0.000218693 |
| <i>ITPRIP</i>   | 1  | 0.000250905 |
| <i>RGS10</i>    | 4  | 0.0000821   |
| <i>ADM</i>      | 0  | 0.0000264   |
| <i>GAS2</i>     | 3  | 0.0000393   |
| <i>TUT1</i>     | 2  | 0.000139559 |
| <i>APIP</i>     | 3  | 0.00014772  |
| <i>SERPING1</i> | 5  | 0.00012527  |
| <i>SLC43A1</i>  | 4  | 0.0000489   |
| <i>PTPRJ</i>    | 1  | 0.00019734  |
| <i>CCDC81</i>   | 7  | 0.000124841 |
| <i>SESN3</i>    | 4  | 0.0000952   |
| <i>ENDOD1</i>   | 4  | 0.000113845 |
| <i>KLHL35</i>   | 7  | 0.000208491 |
| <i>TENM4</i>    | 7  | 0.0000288   |
| <i>SERPINH1</i> | 2  | 0.000106956 |
| <i>CAPN5</i>    | 4  | 0.0000429   |
| <i>PAK1</i>     | 0  | 0.000214624 |
| <i>ZC3H12C</i>  | 0  | 0.0000239   |

|                  |    |             |
|------------------|----|-------------|
| <i>TTC12</i>     | 2  | 0.00018829  |
| <i>NCAM1</i>     | 3  | 0.0000379   |
| <i>HTR3B</i>     | 7  | 0.000248474 |
| <i>GLB1L2</i>    | 7  | 0.0000523   |
| <i>SLX4IP</i>    | 2  | 0.000273768 |
| <i>LAMTOR1</i>   | 0  | 0.000316547 |
| <i>HYOU1</i>     | 1  | 0.00016562  |
| <i>TKFC</i>      | 1  | 0.0001317   |
| <i>MTA2</i>      | 3  | 0.000221891 |
| <i>ROM1</i>      | 7  | 0.0000318   |
| <i>INCENP</i>    | 2  | 0.000145455 |
| <i>ZP1</i>       | 7  | 0.000231975 |
| <i>MS4A3</i>     | 10 | 0.0000753   |
| <i>MS4A2</i>     | 23 | 0.000211123 |
| <i>ESAM</i>      | 4  | 0.000225016 |
| <i>MPZL2</i>     | 0  | 0.000025    |
| <i>TMEM25</i>    | 2  | 0.0000829   |
| <i>COMMD7</i>    | 2  | 0.0000887   |
| <i>C20orf144</i> | 7  | 0.0000237   |
| <i>LSM14B</i>    | 1  | 0.000308925 |
| <i>CABLES2</i>   | 1  | 0.0000921   |
| <i>GPHA2</i>     | 7  | 0.000066    |
| <i>TRPT1</i>     | 1  | 0.000099    |
| <i>FAU</i>       | 3  | 0.0000908   |
| <i>VPS51</i>     | 3  | 0.00018474  |
| <i>PPP4C</i>     | 0  | 0.000210436 |
| <i>TAOK2</i>     | 1  | 0.000333529 |
| <i>CNKS2R2</i>   | 3  | 0.000101595 |
| <i>KLRF1</i>     | 3  | 0.000081    |
| <i>ITGB1</i>     | 3  | 0.000124836 |
| <i>CTF1</i>      | 7  | 0.000117824 |
| <i>FCGR1A</i>    | 5  | 0.000100854 |
| <i>ARID5B</i>    | 3  | 0.000219057 |

|                  |    |             |
|------------------|----|-------------|
| <i>DCUN1D2</i>   | 2  | 0.000412113 |
| <i>TMCO3</i>     | 0  | 0.000245589 |
| <i>TIRAP</i>     | 1  | 0.000211344 |
| <i>EEF1AKMT1</i> | 3  | 0.000111421 |
| <i>LATS2</i>     | 1  | 0.000235527 |
| <i>HNMT</i>      | 3  | 0.0000615   |
| <i>ADRA2A</i>    | 7  | 0.0000661   |
| <i>GPM6A</i>     | 11 | 0.0000422   |
| <i>VEGFC</i>     | 7  | 0.0000773   |
| <i>CCDC102B</i>  | 3  | 0.000144632 |
| <i>CD226</i>     | 3  | 0.000171676 |
| <i>CNDP1</i>     | 7  | 0.000317947 |
| <i>FSIP1</i>     | 24 | 0.0000926   |
| <i>DLG2</i>      | 7  | 0.0000386   |
| <i>RGS18</i>     | 0  | 0.000054    |
| <i>PRSS23</i>    | 3  | 0.0000605   |
| <i>MTMR12</i>    | 2  | 0.000364374 |
| <i>ATPCKMT</i>   | 3  | 0.000316855 |
| <i>PIH1D2</i>    | 7  | 0.000224035 |
| <i>IL18</i>      | 0  | 0.0000566   |
| <i>PIP4K2A</i>   | 4  | 0.000264504 |
| <i>C2orf50</i>   | 7  | 0.0000252   |
| <i>FOXO1</i>     | 2  | 0.000297952 |
| <i>CRIM1</i>     | 3  | 0.0000254   |
| <i>RILPL2</i>    | 0  | 0.000268408 |
| <i>DHX37</i>     | 1  | 0.000263117 |
| <i>UBC</i>       | 0  | 0.000201706 |
| <i>ITPR1</i>     | 2  | 0.000260148 |
| <i>TKTL2</i>     | 7  | 0.0000236   |
| <i>PRSS53</i>    | 1  | 0.000133627 |
| <i>ENKUR</i>     | 4  | 0.0000369   |
| <i>DCP1B</i>     | 3  | 0.000274441 |
| <i>THRB</i>      | 7  | 0.000130615 |

|                 |    |             |
|-----------------|----|-------------|
| <i>UEVLD</i>    | 0  | 0.000340657 |
| <i>TMEM86A</i>  | 2  | 0.0000351   |
| <i>C12orf45</i> | 2  | 0.00022112  |
| <i>TMEM263</i>  | 3  | 0.000228405 |
| <i>BTBD11</i>   | 2  | 0.0000257   |
| <i>UBE3B</i>    | 2  | 0.000381289 |
| <i>ANK3</i>     | 2  | 0.000096    |
| <i>IPMK</i>     | 0  | 0.000115105 |
| <i>DLG5</i>     | 3  | 0.0000497   |
| <i>DIP2C</i>    | 2  | 0.0000263   |
| <i>NUBPL</i>    | 3  | 0.000308117 |
| <i>ANKRD50</i>  | 0  | 0.000194788 |
| <i>UPF2</i>     | 0  | 0.000286549 |
| <i>SCLT1</i>    | 0  | 0.000160546 |
| <i>CCDC3</i>    | 7  | 0.000259729 |
| <i>FRMD4A</i>   | 21 | 0.0000545   |
| <i>PTPRO</i>    | 3  | 0.0000431   |
| <i>EPS8</i>     | 32 | 0.000154847 |
| <i>QDPR</i>     | 2  | 0.0000876   |
| <i>FAM160B1</i> | 0  | 0.000165689 |
| <i>DRD3</i>     | 7  | 0.0000262   |
| <i>ZNF827</i>   | 2  | 0.000147396 |
| <i>NR3C2</i>    | 2  | 0.000204532 |
| <i>DPYSL4</i>   | 7  | 0.0000259   |
| <i>VENTX</i>    | 1  | 0.0000356   |
| <i>ADAM8</i>    | 1  | 0.00016607  |
| <i>RNF144A</i>  | 2  | 0.000115884 |
| <i>ASAP2</i>    | 4  | 0.0000959   |
| <i>FLI1</i>     | 0  | 0.000421895 |
| <i>WWC2</i>     | 2  | 0.0000702   |
| <i>CENPU</i>    | 14 | 0.000130648 |
| <i>ACSL1</i>    | 0  | 0.000092    |
| <i>BICD1</i>    | 2  | 0.000153713 |

|                   |    |             |
|-------------------|----|-------------|
| <i>SAV1</i>       | 3  | 0.000152146 |
| <i>SERP2</i>      | 7  | 0.00012363  |
| <i>CENPJ</i>      | 3  | 0.000261961 |
| <i>CCL28</i>      | 3  | 0.000226983 |
| <i>PARP8</i>      | 0  | 0.00023367  |
| <i>DST</i>        | 0  | 0.0000236   |
| <i>BAG3</i>       | 2  | 0.0000788   |
| <i>GLT1D1</i>     | 1  | 0.000200245 |
| <i>AP1S3</i>      | 11 | 0.0000906   |
| <i>TLCD4</i>      | 4  | 0.0000992   |
| <i>MZT2B</i>      | 3  | 0.0000511   |
| <i>FAM168B</i>    | 2  | 0.000403193 |
| <i>MGAT5</i>      | 2  | 0.000279648 |
| <i>CYSLTR2</i>    | 13 | 0.000159318 |
| <i>ARL11</i>      | 0  | 0.000225932 |
| <i>SETBP1</i>     | 11 | 0.0000872   |
| <i>PSTPIP2</i>    | 5  | 0.0000881   |
| <i>PDE3B</i>      | 0  | 0.000176313 |
| <i>ATG10</i>      | 3  | 0.000104631 |
| <i>SPOCK1</i>     | 7  | 0.0000848   |
| <i>FAM151B</i>    | 0  | 0.0000714   |
| <i>HOMER1</i>     | 3  | 0.0000359   |
| <i>ZNF773</i>     | 3  | 0.000218206 |
| <i>ZNF776</i>     | 0  | 0.000251381 |
| <i>AC010326.1</i> | 3  | 0.000178278 |
| <i>SUV39H2</i>    | 3  | 0.000109626 |
| <i>NMT2</i>       | 3  | 0.000176793 |
| <i>ZNF837</i>     | 3  | 0.0000511   |
| <i>USP12</i>      | 4  | 0.0000998   |
| <i>CAMK4</i>      | 3  | 0.00013925  |
| <i>TRIM36</i>     | 32 | 0.000154847 |
| <i>ZFP36L2</i>    | 0  | 0.0000645   |
| <i>PFKM</i>       | 2  | 0.000199097 |

|                 |    |             |
|-----------------|----|-------------|
| <i>IGSF10</i>   | 7  | 0.000146652 |
| <i>SPEF2</i>    | 3  | 0.000113694 |
| <i>SPARCL1</i>  | 7  | 0.0000728   |
| <i>RASGRP3</i>  | 11 | 0.0000703   |
| <i>CATSPER3</i> | 7  | 0.0000285   |
| <i>TCTEX1D1</i> | 10 | 0.0000605   |
| <i>ANKRD22</i>  | 5  | 0.0000891   |
| <i>PANK1</i>    | 3  | 0.000026    |
| <i>PRDM8</i>    | 1  | 0.0000307   |
| <i>HNRNPDL</i>  | 3  | 0.000329199 |
| <i>HHEX</i>     | 0  | 0.000102708 |
| <i>PTPRK</i>    | 11 | 0.000109411 |
| <i>GGPS1</i>    | 3  | 0.000313158 |
| <i>ZNF117</i>   | 0  | 0.0000487   |
| <i>RAB3C</i>    | 7  | 0.000125873 |
| <i>PLOD2</i>    | 4  | 0.0000464   |
| <i>STK32B</i>   | 7  | 0.000296209 |
| <i>JAKMIP1</i>  | 3  | 0.0000325   |
| <i>CDYL</i>     | 4  | 0.0000525   |
| <i>CARHSP1</i>  | 0  | 0.0000665   |
| <i>BANK1</i>    | 11 | 0.000159994 |
| <i>DAB2</i>     | 2  | 0.0000257   |
| <i>RGPD3</i>    | 7  | 0.0000339   |
| <i>RASSF3</i>   | 1  | 0.000228697 |
| <i>AHCTF1</i>   | 0  | 0.000220849 |
| <i>TMEM87B</i>  | 3  | 0.00028262  |
| <i>PTPRR</i>    | 7  | 0.000274198 |
| <i>CCDC148</i>  | 7  | 0.000192519 |
| <i>FAM49B</i>   | 0  | 0.000304344 |
| <i>ASAP1</i>    | 1  | 0.000135888 |
| <i>LPCAT1</i>   | 1  | 0.00015527  |
| <i>ING1</i>     | 0  | 0.000329355 |
| <i>TEX29</i>    | 7  | 0.0000464   |

|                 |    |             |
|-----------------|----|-------------|
| <i>CMTM7</i>    | 2  | 0.000243351 |
| <i>UBP1</i>     | 2  | 0.000338938 |
| <i>RMND5A</i>   | 0  | 0.00018056  |
| <i>CD8A</i>     | 3  | 0.0000841   |
| <i>RPIA</i>     | 4  | 0.000120508 |
| <i>LURAP1L</i>  | 7  | 0.0000812   |
| <i>CNKS3</i>    | 7  | 0.000289809 |
| <i>JAZF1</i>    | 4  | 0.0000581   |
| <i>PID1</i>     | 2  | 0.0000244   |
| <i>KCTD15</i>   | 1  | 0.0000424   |
| <i>ZNF599</i>   | 2  | 0.000267221 |
| <i>MCOLN2</i>   | 2  | 0.0000253   |
| <i>DDAH1</i>    | 7  | 0.00027645  |
| <i>HS3ST3A1</i> | 7  | 0.000154533 |
| <i>SEMA3D</i>   | 7  | 0.0000236   |
| <i>SLC5A10</i>  | 7  | 0.000298633 |
| <i>AK5</i>      | 3  | 0.0000329   |
| <i>CABYR</i>    | 7  | 0.0000898   |
| <i>SDHAF4</i>   | 3  | 0.000203919 |
| <i>C16orf74</i> | 2  | 0.0000353   |
| <i>TBCEL</i>    | 4  | 0.0000467   |
| <i>ANKH</i>     | 4  | 0.0000716   |
| <i>UBASH3B</i>  | 2  | 0.000217294 |
| <i>ROBO3</i>    | 7  | 0.000273596 |
| <i>RETREG1</i>  | 3  | 0.000132392 |
| <i>PRKCA</i>    | 2  | 0.000148151 |
| <i>LRRK1</i>    | 1  | 0.000231565 |
| <i>ABCA9</i>    | 11 | 0.000154476 |
| <i>ABCA6</i>    | 11 | 0.000167297 |
| <i>ENPP3</i>    | 23 | 0.000181594 |
| <i>DISP1</i>    | 2  | 0.000212038 |
| <i>OBSCN</i>    | 1  | 0.0000657   |
| <i>LONRF1</i>   | 0  | 0.000207722 |

|                 |    |             |
|-----------------|----|-------------|
| <i>TRIM11</i>   | 1  | 0.000263113 |
| <i>ENAH</i>     | 7  | 0.00030004  |
| <i>CCSAP</i>    | 0  | 0.000164398 |
| <i>GBP5</i>     | 5  | 0.000162514 |
| <i>SORBS2</i>   | 7  | 0.000237961 |
| <i>LY96</i>     | 0  | 0.0000515   |
| <i>TMSB4Y</i>   | 12 | 0.000165137 |
| <i>CHODL</i>    | 7  | 0.000148141 |
| <i>L3MBTL4</i>  | 2  | 0.0000235   |
| <i>RABGEF1</i>  | 2  | 0.00031708  |
| <i>JAM2</i>     | 7  | 0.000262887 |
| <i>TSEN2</i>    | 2  | 0.000293953 |
| <i>SLFN13</i>   | 2  | 0.000173467 |
| <i>WNT7A</i>    | 2  | 0.0000423   |
| <i>FLCN</i>     | 1  | 0.000164901 |
| <i>OXNAD1</i>   | 3  | 0.000140997 |
| <i>SKA1</i>     | 14 | 0.000194587 |
| <i>PPP4R1</i>   | 0  | 0.000212839 |
| <i>APCDD1</i>   | 7  | 0.000210485 |
| <i>MPPE1</i>    | 0  | 0.000228475 |
| <i>EME1</i>     | 14 | 0.000064    |
| <i>EPHB1</i>    | 0  | 0.000100096 |
| <i>ANKRD40</i>  | 2  | 0.00031482  |
| <i>VOPP1</i>    | 2  | 0.000199762 |
| <i>KLF10</i>    | 0  | 0.0000257   |
| <i>ATP6V1C1</i> | 0  | 0.000243583 |
| <i>PIP4P2</i>   | 0  | 0.000176742 |
| <i>CDK19</i>    | 0  | 0.000246118 |
| <i>TTC39B</i>   | 3  | 0.000222234 |
| <i>MMS19</i>    | 2  | 0.000360296 |
| <i>GOLGA7B</i>  | 2  | 0.0000635   |
| <i>SAMSN1</i>   | 0  | 0.000136231 |
| <i>GRAMD2B</i>  | 3  | 0.000166139 |

|                 |    |             |
|-----------------|----|-------------|
| <i>RHOC</i>     | 3  | 0.0000382   |
| <i>PPM1J</i>    | 7  | 0.0000574   |
| <i>SLC16A1</i>  | 3  | 0.000107614 |
| <i>OXA1L</i>    | 3  | 0.000308718 |
| <i>SLC7A7</i>   | 0  | 0.000144841 |
| <i>PIK3AP1</i>  | 0  | 0.000150475 |
| <i>TTN</i>      | 11 | 0.0000423   |
| <i>FAM126B</i>  | 0  | 0.000118841 |
| <i>FLACC1</i>   | 4  | 0.0000411   |
| <i>SPAG17</i>   | 7  | 0.000329875 |
| <i>RNF20</i>    | 0  | 0.000261944 |
| <i>PPARGC1B</i> | 2  | 0.0000759   |
| <i>PXYLP1</i>   | 2  | 0.0000243   |
| <i>SLA</i>      | 0  | 0.000240742 |
| <i>TMBIM4</i>   | 0  | 0.000227845 |
| <i>RAB39B</i>   | 3  | 0.000285342 |
| <i>CLIC2</i>    | 4  | 0.000099    |
| <i>MICU3</i>    | 3  | 0.0000299   |
| <i>GRIP1</i>    | 7  | 0.0000239   |
| <i>KIF5A</i>    | 7  | 0.00028906  |
| <i>NAT2</i>     | 7  | 0.000176641 |
| <i>PSD3</i>     | 7  | 0.0000247   |
| <i>CFAP70</i>   | 2  | 0.0000543   |
| <i>GNA14</i>    | 7  | 0.000258656 |
| <i>GNAQ</i>     | 0  | 0.000239052 |
| <i>GPR61</i>    | 7  | 0.000278288 |
| <i>ADK</i>      | 3  | 0.000157965 |
| <i>BATF</i>     | 3  | 0.0000599   |
| <i>NDUFAF6</i>  | 2  | 0.000323655 |
| <i>C8orf37</i>  | 3  | 0.0000667   |
| <i>CFAP161</i>  | 4  | 0.0000311   |
| <i>ADAMTSL3</i> | 7  | 0.000299123 |
| <i>WHAMM</i>    | 2  | 0.00034091  |

|                  |    |             |
|------------------|----|-------------|
| <i>N6AMT1</i>    | 3  | 0.000261849 |
| <i>RWDD2B</i>    | 3  | 0.0000845   |
| <i>BACH1</i>     | 0  | 0.000225983 |
| <i>TIAM1</i>     | 2  | 0.000151071 |
| <i>SCAF4</i>     | 2  | 0.000291169 |
| <i>RPGR</i>      | 0  | 0.000168848 |
| <i>ANKRD9</i>    | 4  | 0.0000408   |
| <i>SFXN2</i>     | 2  | 0.000172905 |
| <i>SH3RF2</i>    | 7  | 0.0000614   |
| <i>PPP2R2B</i>   | 3  | 0.000192976 |
| <i>FAM122C</i>   | 2  | 0.000220853 |
| <i>FBXO43</i>    | 7  | 0.000218845 |
| <i>HK1</i>       | 4  | 0.0000977   |
| <i>UBE2L6</i>    | 5  | 0.000164318 |
| <i>MED19</i>     | 3  | 0.00011139  |
| <i>NPTN</i>      | 0  | 0.000350663 |
| <i>SAMD8</i>     | 0  | 0.000264135 |
| <i>RAB11FIP1</i> | 0  | 0.000205927 |
| <i>AIFM1</i>     | 3  | 0.000340877 |
| <i>MAPK13</i>    | 1  | 0.000172012 |
| <i>MS4A1</i>     | 11 | 0.0000896   |
| <i>TBC1D31</i>   | 3  | 0.000186421 |
| <i>FBXO32</i>    | 2  | 0.000168625 |
| <i>FBRS</i>      | 1  | 0.000218526 |
| <i>FRRS1</i>     | 13 | 0.0000984   |
| <i>MPV17L</i>    | 7  | 0.000150116 |
| <i>GHRL</i>      | 1  | 0.0000247   |
| <i>EXOGL</i>     | 2  | 0.000253093 |
| <i>NTAN1</i>     | 4  | 0.000068    |
| <i>NMNAT2</i>    | 7  | 0.00032886  |
| <i>ZFYVE9</i>    | 3  | 0.00014396  |
| <i>LRP8</i>      | 2  | 0.000192462 |
| <i>SSBP3</i>     | 1  | 0.0000616   |

|                 |    |             |
|-----------------|----|-------------|
| <i>FZD1</i>     | 1  | 0.0000287   |
| <i>SUSD3</i>    | 3  | 0.000107076 |
| <i>DHRS4</i>    | 3  | 0.000174291 |
| <i>CLEC18C</i>  | 7  | 0.0000275   |
| <i>IL34</i>     | 7  | 0.000116964 |
| <i>CACNA2D3</i> | 0  | 0.0000236   |
| <i>CCNB2</i>    | 14 | 0.000180129 |
| <i>MYO1E</i>    | 11 | 0.0000328   |
| <i>AFAP1L1</i>  | 7  | 0.000314257 |
| <i>TSC22D3</i>  | 1  | 0.0000395   |
| <i>KCNJ15</i>   | 0  | 0.0000383   |
| <i>ERG</i>      | 10 | 0.000180192 |
| <i>ETS2</i>     | 0  | 0.000199981 |
| <i>TSPAN18</i>  | 1  | 0.0000764   |
| <i>MX1</i>      | 5  | 0.000178114 |
| <i>SLC38A10</i> | 1  | 0.00014936  |
| <i>C9orf43</i>  | 7  | 0.0000308   |
| <i>ZNF618</i>   | 2  | 0.0000668   |
| <i>TMEM268</i>  | 1  | 0.0000629   |
| <i>SNX22</i>    | 11 | 0.0000356   |
| <i>PSMG3</i>    | 3  | 0.000163638 |
| <i>SLC37A3</i>  | 0  | 0.0000534   |
| <i>GAREM2</i>   | 7  | 0.0000954   |
| <i>SPPL3</i>    | 2  | 0.000252321 |
| <i>WIP12</i>    | 1  | 0.000317008 |
| <i>LDLRAP1</i>  | 2  | 0.000131891 |
| <i>AGAP1</i>    | 3  | 0.0000794   |
| <i>KRTCAP3</i>  | 1  | 0.0000401   |
| <i>WDR66</i>    | 7  | 0.000243654 |
| <i>MRPL17</i>   | 3  | 0.000271287 |
| <i>PTPDC1</i>   | 3  | 0.000262695 |
| <i>HPD</i>      | 7  | 0.000126399 |
| <i>RHPN1</i>    | 1  | 0.0000541   |

|                 |    |             |
|-----------------|----|-------------|
| <i>TPRG1L</i>   | 0  | 0.000205425 |
| <i>LRRC43</i>   | 7  | 0.000245918 |
| <i>PRXL2C</i>   | 3  | 0.000226957 |
| <i>XKR8</i>     | 1  | 0.00015464  |
| <i>TMSB15A</i>  | 7  | 0.0000499   |
| <i>FANCC</i>    | 2  | 0.000204786 |
| <i>ABHD3</i>    | 0  | 0.000198024 |
| <i>TENT5B</i>   | 7  | 0.00011213  |
| <i>COLEC12</i>  | 7  | 0.000189803 |
| <i>RNF207</i>   | 7  | 0.0000288   |
| <i>GPRASP2</i>  | 2  | 0.000025    |
| <i>AUTS2</i>    | 2  | 0.0000297   |
| <i>SHROOM4</i>  | 7  | 0.0000272   |
| <i>H2BC5</i>    | 3  | 0.0000953   |
| <i>CDC25C</i>   | 7  | 0.0000697   |
| <i>H4C8</i>     | 3  | 0.0000604   |
| <i>TMSB15B</i>  | 2  | 0.000113616 |
| <i>TSPAN33</i>  | 4  | 0.00010385  |
| <i>AHCYL2</i>   | 2  | 0.000310354 |
| <i>B4GALT5</i>  | 0  | 0.000122588 |
| <i>CD1D</i>     | 0  | 0.0000917   |
| <i>SPATA2</i>   | 1  | 0.000224324 |
| <i>CD1B</i>     | 7  | 0.0000641   |
| <i>NCF1</i>     | 0  | 0.0000524   |
| <i>GDPD5</i>    | 1  | 0.0000401   |
| <i>ALAS2</i>    | 4  | 0.0000561   |
| <i>PPP1R15B</i> | 0  | 0.000397675 |
| <i>COPG2</i>    | 3  | 0.000242195 |
| <i>PKD1L1</i>   | 7  | 0.000117947 |
| <i>TAGLN2</i>   | 0  | 0.0000847   |
| <i>SLC45A3</i>  | 23 | 0.000119652 |
| <i>HTR6</i>     | 7  | 0.0000976   |
| <i>ITLN2</i>    | 7  | 0.000208807 |

|                |   |             |
|----------------|---|-------------|
| <i>F11R</i>    | 1 | 0.000157032 |
| <i>SPATA2L</i> | 1 | 0.000058    |
| <i>NPM2</i>    | 7 | 0.000283288 |
| <i>CDA</i>     | 1 | 0.0000571   |
| <i>PINK1</i>   | 4 | 0.000196209 |
| <i>B4GALT3</i> | 4 | 0.0000715   |
| <i>DMTN</i>    | 4 | 0.00013674  |
| <i>SLC5A11</i> | 7 | 0.00016943  |
| <i>TOMM40L</i> | 3 | 0.000198471 |
| <i>MPZ</i>     | 0 | 0.0000588   |
| <i>RAPGEF6</i> | 3 | 0.000318594 |
| <i>EPB41</i>   | 4 | 0.000222164 |
| <i>MIS18A</i>  | 2 | 0.0000262   |
| <i>ALG8</i>    | 3 | 0.000380946 |
| <i>MRPL10</i>  | 2 | 0.000105895 |
| <i>IFNGR2</i>  | 0 | 0.000235652 |
| <i>C1QC</i>    | 7 | 0.000116838 |
| <i>KCNE2</i>   | 7 | 0.000133411 |
| <i>RUNX1</i>   | 2 | 0.000303835 |
| <i>CBR1</i>    | 3 | 0.0000953   |
| <i>PADI4</i>   | 1 | 0.0000543   |
| <i>ADIPOR1</i> | 4 | 0.000264859 |
| <i>M1AP</i>    | 7 | 0.000147538 |
| <i>BTG2</i>    | 1 | 0.000126726 |
| <i>HK2</i>     | 0 | 0.000107241 |
| <i>C1R</i>     | 7 | 0.0000551   |
| <i>THEM4</i>   | 2 | 0.00012711  |
| <i>AMFR</i>    | 4 | 0.0000929   |
| <i>RGL4</i>    | 0 | 0.0000287   |
| <i>ACE</i>     | 7 | 0.0000522   |
| <i>TEPP</i>    | 7 | 0.0000614   |
| <i>SPON2</i>   | 3 | 0.0000753   |
| <i>CHCHD6</i>  | 2 | 0.000180819 |

|                  |    |             |
|------------------|----|-------------|
| <i>LRRC36</i>    | 7  | 0.000237246 |
| <i>ATP6V0D1</i>  | 0  | 0.000216338 |
| <i>CARMIL2</i>   | 1  | 0.000135877 |
| <i>C16orf86</i>  | 3  | 0.0000708   |
| <i>PIP</i>       | 7  | 0.000128517 |
| <i>RGS12</i>     | 2  | 0.0000854   |
| <i>ZYX</i>       | 1  | 0.000111543 |
| <i>ZNF230</i>    | 0  | 0.000153365 |
| <i>ZNF221</i>    | 3  | 0.0000331   |
| <i>GNE</i>       | 3  | 0.000385184 |
| <i>TNFRSF13C</i> | 11 | 0.000072    |
| <i>PTGIR</i>     | 1  | 0.000024    |
| <i>CALM3</i>     | 1  | 0.00006     |
| <i>CCDC28B</i>   | 3  | 0.000073    |
| <i>TMEM234</i>   | 1  | 0.000248052 |
| <i>ZBTB8A</i>    | 7  | 0.000233459 |
| <i>ATAD3B</i>    | 3  | 0.000118849 |
| <i>UBE2J2</i>    | 1  | 0.000422511 |
| <i>CCDC58</i>    | 3  | 0.000195422 |
| <i>KALRN</i>     | 7  | 0.000159284 |
| <i>ABCG1</i>     | 0  | 0.0000413   |
| <i>UBASH3A</i>   | 2  | 0.00011429  |
| <i>RSPH1</i>     | 7  | 0.000295217 |
| <i>PKNOX1</i>    | 2  | 0.000220134 |
| <i>HSF2BP</i>    | 7  | 0.0000557   |
| <i>RRP1B</i>     | 2  | 0.000276399 |
| <i>PDXK</i>      | 1  | 0.00025363  |
| <i>G6PD</i>      | 1  | 0.000149621 |
| <i>CSTB</i>      | 3  | 0.0000242   |
| <i>GATD3A</i>    | 33 | 0.000154847 |
| <i>ZNF66</i>     | 0  | 0.0000423   |
| <i>LRRC3</i>     | 7  | 0.000129092 |
| <i>ITGB2</i>     | 0  | 0.0000973   |

|                 |    |             |
|-----------------|----|-------------|
| <i>FTCD</i>     | 7  | 0.000225292 |
| <i>SPATC1L</i>  | 7  | 0.0000517   |
| <i>LSS</i>      | 2  | 0.000142533 |
| <i>VAV2</i>     | 1  | 0.0000468   |
| <i>MCM3AP</i>   | 2  | 0.000322498 |
| <i>C21orf58</i> | 1  | 0.0000422   |
| <i>PCNT</i>     | 2  | 0.000197058 |
| <i>DIP2A</i>    | 2  | 0.0000731   |
| <i>PRMT2</i>    | 3  | 0.000320019 |
| <i>CLDND2</i>   | 3  | 0.0000781   |
| <i>CACFD1</i>   | 1  | 0.0000264   |
| <i>SLC2A6</i>   | 1  | 0.0000636   |
| <i>ZNF761</i>   | 3  | 0.000133421 |
| <i>FCN2</i>     | 7  | 0.000240594 |
| <i>C9orf116</i> | 7  | 0.000172799 |
| <i>LCN1</i>     | 7  | 0.000193071 |
| <i>ZNF714</i>   | 3  | 0.0000882   |
| <i>GPSM1</i>    | 2  | 0.0000502   |
| <i>TOR2A</i>    | 1  | 0.000160858 |
| <i>SHKBP1</i>   | 1  | 0.000103126 |
| <i>RDH13</i>    | 2  | 0.0000289   |
| <i>ZER1</i>     | 4  | 0.000157938 |
| <i>ZDHHC12</i>  | 1  | 0.0000417   |
| <i>BRSK1</i>    | 7  | 0.000305166 |
| <i>NLRP4</i>    | 7  | 0.000215583 |
| <i>MED27</i>    | 2  | 0.000342865 |
| <i>DEDD2</i>    | 0  | 0.000319403 |
| <i>MPZL3</i>    | 0  | 0.000190132 |
| <i>JAML</i>     | 0  | 0.000249094 |
| <i>NEK8</i>     | 1  | 0.000100475 |
| <i>TLCD1</i>    | 7  | 0.000164451 |
| <i>CD3G</i>     | 3  | 0.0000956   |
| <i>CXCR5</i>    | 11 | 0.000123404 |

|                 |    |             |
|-----------------|----|-------------|
| <i>ZBTB7B</i>   | 1  | 0.000193993 |
| <i>NLRX1</i>    | 1  | 0.000187597 |
| <i>IL6R</i>     | 0  | 0.000271397 |
| <i>UBE2Q1</i>   | 0  | 0.000337    |
| <i>ANO10</i>    | 0  | 0.000231118 |
| <i>PAQR6</i>    | 1  | 0.0000254   |
| <i>PMF1</i>     | 0  | 0.000113916 |
| <i>SLC25A44</i> | 1  | 0.000257482 |
| <i>CCR5</i>     | 3  | 0.0000617   |
| <i>UBQLN4</i>   | 2  | 0.000234928 |
| <i>FCRL3</i>    | 11 | 0.0000305   |
| <i>NACC1</i>    | 1  | 0.000178391 |
| <i>HK3</i>      | 0  | 0.0000543   |
| <i>IER2</i>     | 0  | 0.000155743 |
| <i>LY6E</i>     | 5  | 0.000128607 |
| <i>VPS28</i>    | 0  | 0.0000261   |
| <i>TONSL</i>    | 7  | 0.00017754  |
| <i>PTGER1</i>   | 7  | 0.000148236 |
| <i>ZNF333</i>   | 0  | 0.000265724 |
| <i>COL26A1</i>  | 7  | 0.000100162 |
| <i>PPP1R16A</i> | 1  | 0.0000567   |
| <i>ORAI2</i>    | 1  | 0.0001325   |
| <i>SH2B2</i>    | 1  | 0.000088    |
| <i>MRNIP</i>    | 2  | 0.0000909   |
| <i>SQSTM1</i>   | 0  | 0.000253779 |
| <i>RPL8</i>     | 3  | 0.000136149 |
| <i>MAML1</i>    | 1  | 0.000264333 |
| <i>LRWD1</i>    | 1  | 0.000128449 |
| <i>FBXL13</i>   | 34 | 0.000154847 |
| <i>MFSD12</i>   | 1  | 0.000138438 |
| <i>USP41</i>    | 7  | 0.000247569 |
| <i>YDJC</i>     | 3  | 0.000141064 |
| <i>AP2M1</i>    | 4  | 0.000147918 |

|                 |    |             |
|-----------------|----|-------------|
| <i>DMKN</i>     | 7  | 0.000231878 |
| <i>U2AF1L4</i>  | 1  | 0.0000387   |
| <i>BDH1</i>     | 2  | 0.000164163 |
| <i>PLXDC1</i>   | 2  | 0.0000309   |
| <i>IKZF3</i>    | 2  | 0.000120991 |
| <i>FDXR</i>     | 2  | 0.0000328   |
| <i>ACOX1</i>    | 0  | 0.000168775 |
| <i>PRPSAP1</i>  | 2  | 0.000338088 |
| <i>CYGB</i>     | 7  | 0.000228693 |
| <i>ZNF577</i>   | 3  | 0.000259227 |
| <i>ALDH16A1</i> | 3  | 0.0000711   |
| <i>ITGA5</i>    | 1  | 0.000254    |
| <i>ZNF385A</i>  | 1  | 0.000101316 |
| <i>EMC10</i>    | 3  | 0.000191475 |
| <i>JOSD2</i>    | 3  | 0.0000738   |
| <i>PLCD3</i>    | 7  | 0.000292679 |
| <i>FMNL3</i>    | 2  | 0.000203882 |
| <i>RAVER1</i>   | 1  | 0.000185261 |
| <i>SPC24</i>    | 14 | 0.000167261 |
| <i>ALOX15</i>   | 13 | 0.000105312 |
| <i>TREML1</i>   | 4  | 0.000216911 |
| <i>CXCL16</i>   | 1  | 0.0000298   |
| <i>SCIMP</i>    | 2  | 0.0000265   |
| <i>TNFSF13</i>  | 0  | 0.0000817   |
| <i>EIF4A1</i>   | 2  | 0.000238086 |
| <i>CCDC42</i>   | 7  | 0.000276213 |
| <i>POLR3K</i>   | 2  | 0.000245933 |
| <i>SNRNP25</i>  | 3  | 0.0000602   |
| <i>JMJD8</i>    | 1  | 0.000188332 |
| <i>CCDC78</i>   | 7  | 0.0000393   |
| <i>TEDC2</i>    | 7  | 0.000224657 |
| <i>CCNF</i>     | 14 | 0.0000411   |
| <i>FLYWCH2</i>  | 3  | 0.000112347 |

|                 |    |             |
|-----------------|----|-------------|
| <i>ADCY9</i>    | 2  | 0.0000432   |
| <i>CYB561A3</i> | 2  | 0.000135272 |
| <i>PPP1R32</i>  | 1  | 0.0000545   |
| <i>ASRGL1</i>   | 13 | 0.0000315   |
| <i>GNG3</i>     | 7  | 0.000109026 |
| <i>UBXN1</i>    | 3  | 0.000345853 |
| <i>LBHD1</i>    | 2  | 0.000234511 |
| <i>RPL29</i>    | 3  | 0.0000926   |
| <i>RPS6KA4</i>  | 1  | 0.000151061 |
| <i>LRP5</i>     | 7  | 0.000286439 |
| <i>TAL1</i>     | 4  | 0.00021115  |
| <i>BEND5</i>    | 11 | 0.0000413   |
| <i>ZYG11B</i>   | 0  | 0.000256537 |
| <i>ACOT11</i>   | 7  | 0.0001      |
| <i>PARS2</i>    | 2  | 0.0000413   |
| <i>LEXM</i>     | 3  | 0.000073    |
| <i>KLHL21</i>   | 1  | 0.000220487 |
| <i>ZSWIM5</i>   | 2  | 0.0000235   |
| <i>SELENON</i>  | 1  | 0.000099    |
| <i>JAK1</i>     | 0  | 0.000251571 |
| <i>CTRC</i>     | 7  | 0.000191566 |
| <i>RBP7</i>     | 0  | 0.000033    |
| <i>SLC25A34</i> | 1  | 0.0000369   |
| <i>DHRS3</i>    | 3  | 0.0000657   |
| <i>LAPTM5</i>   | 1  | 0.00021139  |
| <i>SDC3</i>     | 7  | 0.0000781   |
| <i>PEF1</i>     | 0  | 0.000329626 |
| <i>TSSK3</i>    | 7  | 0.0000803   |
| <i>TMCO4</i>    | 2  | 0.000254216 |
| <i>CAMK2N1</i>  | 7  | 0.000176323 |
| <i>ALPL</i>     | 1  | 0.0000517   |
| <i>SCNN1D</i>   | 1  | 0.0000529   |
| <i>MXRA8</i>    | 7  | 0.000127242 |

|                 |    |             |
|-----------------|----|-------------|
| <i>C1orf87</i>  | 7  | 0.000159758 |
| <i>NFIA</i>     | 4  | 0.0000468   |
| <i>DNAJB4</i>   | 3  | 0.000134041 |
| <i>GBP4</i>     | 5  | 0.00015384  |
| <i>GFI1</i>     | 3  | 0.000100621 |
| <i>VCAM1</i>    | 7  | 0.0000292   |
| <i>ZNF281</i>   | 0  | 0.000171947 |
| <i>ARPC5</i>    | 0  | 0.000223061 |
| <i>NLRP3</i>    | 0  | 0.000100191 |
| <i>ZNF496</i>   | 1  | 0.000065    |
| <i>TRIM58</i>   | 4  | 0.000214235 |
| <i>IGSF8</i>    | 1  | 0.000165973 |
| <i>DDR2</i>     | 7  | 0.000297827 |
| <i>PEA15</i>    | 3  | 0.0000772   |
| <i>SLAMF6</i>   | 2  | 0.000200808 |
| <i>OLFML2B</i>  | 7  | 0.00014159  |
| <i>FCGR3B</i>   | 0  | 0.0000271   |
| <i>FLVCR1</i>   | 3  | 0.0000385   |
| <i>ATF3</i>     | 5  | 0.0000538   |
| <i>DENND2D</i>  | 2  | 0.000282441 |
| <i>IER5</i>     | 3  | 0.000162711 |
| <i>ACP6</i>     | 2  | 0.000161894 |
| <i>WDR64</i>    | 7  | 0.000189063 |
| <i>TFB2M</i>    | 3  | 0.000256635 |
| <i>PKDCC</i>    | 7  | 0.000233849 |
| <i>OXER1</i>    | 1  | 0.0000377   |
| <i>MAPKAPK2</i> | 1  | 0.000261842 |
| <i>IL24</i>     | 7  | 0.000237846 |
| <i>FCMR</i>     | 2  | 0.0000901   |
| <i>PIGR</i>     | 11 | 0.00015883  |
| <i>WDR26</i>    | 0  | 0.000143691 |
| <i>REL</i>      | 2  | 0.000307666 |
| <i>KIAA1841</i> | 0  | 0.00019283  |

|                 |    |             |
|-----------------|----|-------------|
| <i>RFTN2</i>    | 7  | 0.000269173 |
| <i>DISC1</i>    | 2  | 0.000037    |
| <i>MEMO1</i>    | 2  | 0.000150736 |
| <i>MAIP1</i>    | 3  | 0.000225686 |
| <i>DUSP19</i>   | 3  | 0.0000855   |
| <i>NUP35</i>    | 3  | 0.000315143 |
| <i>H3-3A</i>    | 0  | 0.000180808 |
| <i>COQ8A</i>    | 0  | 0.0000829   |
| <i>SGCB</i>     | 3  | 0.000145628 |
| <i>BBS5</i>     | 7  | 0.000140911 |
| <i>PDLIM5</i>   | 0  | 0.000326142 |
| <i>NEURL3</i>   | 7  | 0.000254043 |
| <i>ANKRD23</i>  | 2  | 0.00020727  |
| <i>CTSS</i>     | 0  | 0.000199677 |
| <i>BNIP1</i>    | 1  | 0.0000259   |
| <i>SCNM1</i>    | 1  | 0.0000444   |
| <i>VPS72</i>    | 3  | 0.000314676 |
| <i>ERCC3</i>    | 2  | 0.000417463 |
| <i>RNF149</i>   | 0  | 0.000262748 |
| <i>BOLA3</i>    | 3  | 0.0000277   |
| <i>CDC42EP3</i> | 0  | 0.0000902   |
| <i>S100A11</i>  | 1  | 0.0000427   |
| <i>ARHGAP25</i> | 0  | 0.00031028  |
| <i>S100A9</i>   | 0  | 0.0000578   |
| <i>S100A12</i>  | 3  | 0.0000281   |
| <i>TGFA</i>     | 0  | 0.000110205 |
| <i>NIPAL1</i>   | 31 | 0.000154847 |
| <i>GPR155</i>   | 0  | 0.000170343 |
| <i>PMVK</i>     | 3  | 0.000191451 |
| <i>PBXIP1</i>   | 1  | 0.000112126 |
| <i>PYGO2</i>    | 1  | 0.000241688 |
| <i>HIPK1</i>    | 0  | 0.000232318 |
| <i>DCST2</i>    | 7  | 0.0001899   |

|                 |    |             |
|-----------------|----|-------------|
| <i>DCST1</i>    | 7  | 0.000207914 |
| <i>COL6A3</i>   | 7  | 0.000168497 |
| <i>YY1AP1</i>   | 2  | 0.00011231  |
| <i>KBTBD8</i>   | 3  | 0.0000715   |
| <i>SLC22A15</i> | 0  | 0.000158683 |
| <i>ATP1A1</i>   | 2  | 0.000340187 |
| <i>SLC15A2</i>  | 2  | 0.0000768   |
| <i>EIF4E3</i>   | 0  | 0.000143898 |
| <i>PROK2</i>    | 0  | 0.0000376   |
| <i>ELF3</i>     | 7  | 0.000173958 |
| <i>IGFBP7</i>   | 3  | 0.0000728   |
| <i>TRIM46</i>   | 1  | 0.000064    |
| <i>CXCR1</i>    | 0  | 0.0000984   |
| <i>TSACC</i>    | 7  | 0.000179058 |
| <i>STK36</i>    | 2  | 0.000215191 |
| <i>ADORA1</i>   | 7  | 0.000285628 |
| <i>CCDC141</i>  | 11 | 0.0000461   |
| <i>IHH</i>      | 7  | 0.000271108 |
| <i>CIP2A</i>    | 3  | 0.0000573   |
| <i>EOMES</i>    | 3  | 0.0000923   |
| <i>HDAC11</i>   | 2  | 0.0000244   |
| <i>FCRL1</i>    | 11 | 0.000169968 |
| <i>SGO2</i>     | 3  | 0.000082    |
| <i>SERPINI1</i> | 3  | 0.00014297  |
| <i>NUAK2</i>    | 1  | 0.00021519  |
| <i>SPTA1</i>    | 4  | 0.000062    |
| <i>MNDA</i>     | 0  | 0.000118982 |
| <i>PYHIN1</i>   | 3  | 0.000174336 |
| <i>PPM1L</i>    | 2  | 0.0000725   |
| <i>ICA1L</i>    | 24 | 0.0000479   |
| <i>CTLA4</i>    | 3  | 0.0000341   |
| <i>ICOS</i>     | 3  | 0.000151714 |
| <i>RYBP</i>     | 0  | 0.000244954 |

|                |    |             |
|----------------|----|-------------|
| <i>PPP4R2</i>  | 3  | 0.000155737 |
| <i>CCDC191</i> | 3  | 0.000095    |
| <i>CDS1</i>    | 7  | 0.0000319   |
| <i>WDFY3</i>   | 0  | 0.000147934 |
| <i>PTPN13</i>  | 2  | 0.0000332   |
| <i>C4orf36</i> | 7  | 0.000150253 |
| <i>ERICH6</i>  | 7  | 0.000209565 |
| <i>HESX1</i>   | 5  | 0.0000932   |
| <i>RPL9</i>    | 3  | 0.0000445   |
| <i>SMIM14</i>  | 3  | 0.000274475 |
| <i>RBM47</i>   | 0  | 0.000173172 |
| <i>APBB2</i>   | 7  | 0.0000859   |
| <i>IL17RE</i>  | 7  | 0.000102609 |
| <i>CRELD1</i>  | 2  | 0.000330567 |
| <i>PCOLCE2</i> | 7  | 0.000110653 |
| <i>CXCL3</i>   | 7  | 0.000224565 |
| <i>PPBP</i>    | 4  | 0.0000686   |
| <i>PF4</i>     | 4  | 0.0000815   |
| <i>CXCL1</i>   | 0  | 0.0000251   |
| <i>RCHY1</i>   | 3  | 0.000253817 |
| <i>PLSCR2</i>  | 5  | 0.0000276   |
| <i>CPA3</i>    | 23 | 0.000188573 |
| <i>GYG1</i>    | 0  | 0.0000822   |
| <i>SNRK</i>    | 0  | 0.000300196 |
| <i>UCN</i>     | 1  | 0.0000237   |
| <i>SPDYA</i>   | 0  | 0.000114277 |
| <i>KIF15</i>   | 14 | 0.000106307 |
| <i>CDCP1</i>   | 7  | 0.000196568 |
| <i>LRRC2</i>   | 21 | 0.000124968 |
| <i>ZNF148</i>  | 0  | 0.000278056 |
| <i>NMNAT3</i>  | 2  | 0.0000393   |
| <i>LIPH</i>    | 4  | 0.0000469   |
| <i>IFT122</i>  | 2  | 0.00027603  |

|                |    |             |
|----------------|----|-------------|
| <i>BAP1</i>    | 0  | 0.000278929 |
| <i>TKT</i>     | 0  | 0.000221353 |
| <i>PRKCD</i>   | 1  | 0.00020791  |
| <i>RFT1</i>    | 2  | 0.000355438 |
| <i>UVSSA</i>   | 1  | 0.0000537   |
| <i>SLBP</i>    | 0  | 0.000268383 |
| <i>SLC51A</i>  | 7  | 0.000244453 |
| <i>UBXN7</i>   | 2  | 0.000339833 |
| <i>PIGX</i>    | 0  | 0.000194652 |
| <i>C1orf50</i> | 2  | 0.000250333 |
| <i>ERMAP</i>   | 4  | 0.0000463   |
| <i>ZNF691</i>  | 3  | 0.000436666 |
| <i>SGMS2</i>   | 0  | 0.0000639   |
| <i>SLC9B1</i>  | 3  | 0.00010643  |
| <i>SLC9B2</i>  | 3  | 0.00023798  |
| <i>BDH2</i>    | 3  | 0.00010829  |
| <i>CDC25A</i>  | 14 | 0.00014003  |
| <i>CAMP</i>    | 10 | 0.000228888 |
| <i>SHISA5</i>  | 1  | 0.0000897   |
| <i>RNF123</i>  | 4  | 0.000204348 |
| <i>MON1A</i>   | 3  | 0.000177054 |
| <i>GRM2</i>    | 7  | 0.000295979 |
| <i>DUSP7</i>   | 1  | 0.000142335 |
| <i>NDST3</i>   | 7  | 0.000104308 |
| <i>HMGB2</i>   | 3  | 0.0000536   |
| <i>SCRG1</i>   | 7  | 0.000171273 |
| <i>ANXA5</i>   | 0  | 0.000102942 |
| <i>GUCY1A1</i> | 4  | 0.000109105 |
| <i>TMEM144</i> | 2  | 0.0000257   |
| <i>GASK1B</i>  | 0  | 0.0000257   |
| <i>ARFIP1</i>  | 0  | 0.000180423 |
| <i>ELOVL7</i>  | 4  | 0.000214488 |
| <i>NDUFAF2</i> | 3  | 0.000196013 |

|                 |    |             |
|-----------------|----|-------------|
| <i>STARD4</i>   | 3  | 0.000108535 |
| <i>CCDC112</i>  | 3  | 0.000149968 |
| <i>ANKRD33B</i> | 1  | 0.0000236   |
| <i>C5orf63</i>  | 3  | 0.000203843 |
| <i>WDR41</i>    | 3  | 0.000297808 |
| <i>RHOBTB3</i>  | 3  | 0.0000235   |
| <i>SERINC5</i>  | 2  | 0.000181142 |
| <i>EBF1</i>     | 11 | 0.000101145 |
| <i>TLR3</i>     | 3  | 0.0000273   |
| <i>ACSL6</i>    | 3  | 0.0000337   |
| <i>LEAP2</i>    | 2  | 0.00019609  |
| <i>GJB7</i>     | 7  | 0.00027045  |
| <i>GRIK2</i>    | 7  | 0.000169332 |
| <i>CREBRF</i>   | 0  | 0.000244172 |
| <i>SAMD3</i>    | 3  | 0.000133333 |
| <i>STXBP5</i>   | 0  | 0.00017725  |
| <i>KIAA0895</i> | 7  | 0.000207042 |
| <i>RPS14</i>    | 3  | 0.000100219 |
| <i>COG5</i>     | 3  | 0.000218383 |
| <i>GPR85</i>    | 7  | 0.0000365   |
| <i>SLU7</i>     | 0  | 0.000207599 |
| <i>RP9</i>      | 3  | 0.000242367 |
| <i>PTTG1</i>    | 14 | 0.000222197 |
| <i>STEAP1</i>   | 7  | 0.00026084  |
| <i>CDCA7L</i>   | 3  | 0.0000598   |
| <i>USP49</i>    | 0  | 0.000132507 |
| <i>SYTL3</i>    | 1  | 0.0000833   |
| <i>IQUB</i>     | 7  | 0.000267797 |
| <i>FABP5</i>    | 14 | 0.000191409 |
| <i>TAGAP</i>    | 0  | 0.000166737 |
| <i>CHMP4C</i>   | 7  | 0.000176025 |
| <i>LMTK2</i>    | 1  | 0.000168295 |
| <i>CTSB</i>     | 4  | 0.000126597 |

|                 |    |             |
|-----------------|----|-------------|
| <i>C8orf48</i>  | 7  | 0.000228938 |
| <i>SUN3</i>     | 7  | 0.00024325  |
| <i>C7orf57</i>  | 7  | 0.000240736 |
| <i>DEFA4</i>    | 10 | 0.000249766 |
| <i>OSGIN2</i>   | 0  | 0.00012406  |
| <i>DEFB1</i>    | 7  | 0.00010829  |
| <i>SUN1</i>     | 2  | 0.000307582 |
| <i>GPB1</i>     | 7  | 0.0000279   |
| <i>NOS3</i>     | 7  | 0.0000771   |
| <i>MICALL2</i>  | 7  | 0.0000257   |
| <i>CDK5</i>     | 3  | 0.000158452 |
| <i>TMUB1</i>    | 3  | 0.0000849   |
| <i>FMC1</i>     | 3  | 0.0000853   |
| <i>BAALC</i>    | 7  | 0.000229842 |
| <i>SLC25A32</i> | 3  | 0.000211272 |
| <i>TP53INP1</i> | 0  | 0.00018874  |
| <i>GEM</i>      | 7  | 0.000151844 |
| <i>TMEM67</i>   | 3  | 0.000169566 |
| <i>C9orf24</i>  | 7  | 0.000215352 |
| <i>MYORG</i>    | 7  | 0.000316141 |
| <i>CCDC171</i>  | 3  | 0.0000236   |
| <i>UBAP1</i>    | 4  | 0.0000845   |
| <i>DIRAS2</i>   | 7  | 0.000270372 |
| <i>SYK</i>      | 0  | 0.000259678 |
| <i>ABCA1</i>    | 0  | 0.0000412   |
| <i>NFIL3</i>    | 0  | 0.000142495 |
| <i>LETM2</i>    | 0  | 0.0000431   |
| <i>NKX6-3</i>   | 7  | 0.00014332  |
| <i>TMEM71</i>   | 0  | 0.000210979 |
| <i>CPA6</i>     | 7  | 0.0002594   |
| <i>ALDH1A1</i>  | 0  | 0.0000262   |
| <i>KDM1B</i>    | 1  | 0.000204711 |
| <i>HGSNAT</i>   | 2  | 0.000301656 |

|                 |    |             |
|-----------------|----|-------------|
| <i>RASEF</i>    | 7  | 0.000304499 |
| <i>KIF27</i>    | 0  | 0.0000889   |
| <i>C9orf64</i>  | 0  | 0.000288232 |
| <i>HNRNPK</i>   | 0  | 0.000279655 |
| <i>ANKS6</i>    | 2  | 0.000216894 |
| <i>FBP1</i>     | 0  | 0.000055    |
| <i>CYBB</i>     | 0  | 0.000120182 |
| <i>MID1IP1</i>  | 0  | 0.000136629 |
| <i>KIAA1958</i> | 5  | 0.0000742   |
| <i>STRBP</i>    | 3  | 0.000201623 |
| <i>ZNF367</i>   | 3  | 0.0000879   |
| <i>NLGN4Y</i>   | 12 | 0.0000936   |
| <i>AQP7</i>     | 7  | 0.000343015 |
| <i>NOL6</i>     | 1  | 0.000236712 |
| <i>VCP</i>      | 0  | 0.000207527 |
| <i>STOML2</i>   | 4  | 0.000129425 |
| <i>HECTD2</i>   | 3  | 0.0000242   |
| <i>INTS6L</i>   | 3  | 0.000361703 |
| <i>SPTSSA</i>   | 3  | 0.000120142 |
| <i>MARCHF8</i>  | 4  | 0.000237684 |
| <i>TSHR</i>     | 7  | 0.000233067 |
| <i>ZCCHC24</i>  | 1  | 0.0000259   |
| <i>PGM2L1</i>   | 3  | 0.0000623   |
| <i>CRYL1</i>    | 3  | 0.000253881 |
| <i>SKA3</i>     | 14 | 0.000117589 |
| <i>DDIAS</i>    | 0  | 0.0000258   |
| <i>EML5</i>     | 3  | 0.000169004 |
| <i>ARF6</i>     | 3  | 0.000337354 |
| <i>TTC8</i>     | 3  | 0.0000506   |
| <i>NOXRED1</i>  | 0  | 0.000138055 |
| <i>FAAH2</i>    | 3  | 0.0000831   |
| <i>OXGR1</i>    | 7  | 0.000233974 |
| <i>TAF3</i>     | 2  | 0.000302611 |

|                 |   |             |
|-----------------|---|-------------|
| <i>COMTD1</i>   | 3 | 0.0000572   |
| <i>PDZD8</i>    | 0 | 0.000127918 |
| <i>ZNF503</i>   | 7 | 0.0000606   |
| <i>QSOX2</i>    | 2 | 0.000149172 |
| <i>CLEC1B</i>   | 4 | 0.0000335   |
| <i>TMEM52B</i>  | 7 | 0.000216705 |
| <i>ENTR1</i>    | 3 | 0.00027757  |
| <i>SPACA9</i>   | 7 | 0.0000726   |
| <i>BORCS5</i>   | 2 | 0.000176812 |
| <i>ZMYND19</i>  | 3 | 0.00024259  |
| <i>DDX21</i>    | 3 | 0.000282753 |
| <i>STK32C</i>   | 3 | 0.000055    |
| <i>JCAD</i>     | 7 | 0.000301138 |
| <i>FUNDC2</i>   | 3 | 0.000138808 |
| <i>METTL17</i>  | 2 | 0.000330627 |
| <i>NDRG2</i>    | 2 | 0.0000509   |
| <i>ARHGEF40</i> | 1 | 0.0000943   |
| <i>CASP7</i>    | 3 | 0.0000947   |
| <i>CCDC186</i>  | 0 | 0.000207578 |
| <i>SALL2</i>    | 7 | 0.000150888 |
| <i>ZFYVE1</i>   | 1 | 0.000312867 |
| <i>C10orf82</i> | 7 | 0.0000383   |
| <i>FRAT1</i>    | 0 | 0.0000836   |
| <i>UBTD1</i>    | 1 | 0.00007     |
| <i>ANKRD2</i>   | 7 | 0.000224083 |
| <i>LARGE2</i>   | 1 | 0.0000688   |
| <i>TTC7B</i>    | 7 | 0.000133804 |
| <i>PSMC3</i>    | 3 | 0.000188852 |
| <i>RAPSN</i>    | 1 | 0.0000564   |
| <i>AGBL2</i>    | 2 | 0.0000269   |
| <i>TC2N</i>     | 3 | 0.000188454 |
| <i>IFI27L1</i>  | 3 | 0.0000364   |
| <i>CLMN</i>     | 2 | 0.0000584   |

|                 |    |             |
|-----------------|----|-------------|
| <i>SMCO4</i>    | 0  | 0.0000244   |
| <i>AMOTL1</i>   | 7  | 0.0000483   |
| <i>HTRA1</i>    | 7  | 0.0000236   |
| <i>TCP11L2</i>  | 0  | 0.000110405 |
| <i>CMTM5</i>    | 4  | 0.0002154   |
| <i>GLB1L3</i>   | 7  | 0.000343783 |
| <i>AMN</i>      | 7  | 0.0000542   |
| <i>RAB8B</i>    | 0  | 0.000202977 |
| <i>IKBIP</i>    | 0  | 0.00010143  |
| <i>RPUSD2</i>   | 3  | 0.000278148 |
| <i>NDUFB8</i>   | 3  | 0.000153055 |
| <i>ZFYVE19</i>  | 2  | 0.000253635 |
| <i>PPP1R14D</i> | 7  | 0.000194613 |
| <i>SPINT1</i>   | 1  | 0.000037    |
| <i>FBN1</i>     | 7  | 0.0000481   |
| <i>LRTM2</i>    | 7  | 0.000297969 |
| <i>BRD7</i>     | 3  | 0.000314783 |
| <i>BTRC</i>     | 2  | 0.000295814 |
| <i>POLL</i>     | 4  | 0.000128612 |
| <i>DPCD</i>     | 4  | 0.0000292   |
| <i>HPS6</i>     | 1  | 0.000140455 |
| <i>SENP8</i>    | 24 | 0.000111263 |
| <i>PCBD1</i>    | 3  | 0.000137941 |
| <i>C16orf71</i> | 7  | 0.000244386 |
| <i>CLMP</i>     | 7  | 0.000291324 |
| <i>ZNF202</i>   | 3  | 0.000392418 |
| <i>MYRFL</i>    | 7  | 0.000255461 |
| <i>C2</i>       | 2  | 0.0000942   |
| <i>PLEKHF1</i>  | 3  | 0.0000626   |
| <i>APBB1</i>    | 2  | 0.000120196 |
| <i>C11orf65</i> | 7  | 0.0000297   |
| <i>DCHS1</i>    | 1  | 0.0000249   |
| <i>CYB5A</i>    | 3  | 0.000138999 |

|                 |    |             |
|-----------------|----|-------------|
| <i>WDR88</i>    | 7  | 0.0002453   |
| <i>PPFIBP2</i>  | 2  | 0.0000529   |
| <i>CYB5R2</i>   | 7  | 0.000225754 |
| <i>SERPINB8</i> | 0  | 0.000190291 |
| <i>RIC3</i>     | 3  | 0.000115403 |
| <i>ZMAT1</i>    | 3  | 0.000272277 |
| <i>TRIM66</i>   | 2  | 0.0000655   |
| <i>RNF169</i>   | 0  | 0.000349199 |
| <i>RPL27A</i>   | 3  | 0.000105071 |
| <i>CDYL2</i>    | 2  | 0.000129733 |
| <i>C16orf46</i> | 7  | 0.0000495   |
| <i>PRKCB</i>    | 0  | 0.000265115 |
| <i>CLEC4E</i>   | 0  | 0.0000466   |
| <i>RIMKLB</i>   | 3  | 0.000253746 |
| <i>TK2</i>      | 0  | 0.0000866   |
| <i>SLC38A8</i>  | 7  | 0.000298369 |
| <i>IQCD</i>     | 7  | 0.0000248   |
| <i>NDEL1</i>    | 0  | 0.000225588 |
| <i>CENPV</i>    | 3  | 0.0000293   |
| <i>RRAD</i>     | 7  | 0.000237031 |
| <i>CIAO2B</i>   | 3  | 0.000270721 |
| <i>ATF7IP2</i>  | 3  | 0.000213372 |
| <i>TVP23A</i>   | 7  | 0.000332051 |
| <i>BEX3</i>     | 4  | 0.0000306   |
| <i>COG1</i>     | 2  | 0.000345557 |
| <i>PLEKHA7</i>  | 7  | 0.0000718   |
| <i>ZCCHC18</i>  | 11 | 0.0000346   |
| <i>NNMT</i>     | 7  | 0.000259648 |
| <i>ACSM1</i>    | 7  | 0.0000524   |
| <i>CATSPER2</i> | 2  | 0.000101912 |
| <i>MARF1</i>    | 1  | 0.000135537 |
| <i>LDHAL6A</i>  | 7  | 0.0000606   |
| <i>PCLAF</i>    | 14 | 0.000218687 |

|                |   |             |
|----------------|---|-------------|
| <i>ANPEP</i>   | 1 | 0.0000954   |
| <i>RBPM52</i>  | 7 | 0.000102475 |
| <i>PLK1</i>    | 2 | 0.0000361   |
| <i>TAC3</i>    | 7 | 0.000222134 |
| <i>MYO1A</i>   | 7 | 0.000310416 |
| <i>NEMP1</i>   | 3 | 0.000311289 |
| <i>NAB2</i>    | 3 | 0.000113969 |
| <i>STAT6</i>   | 1 | 0.000252174 |
| <i>PATL1</i>   | 1 | 0.000148591 |
| <i>ATP23</i>   | 3 | 0.0000467   |
| <i>STX3</i>    | 0 | 0.000189545 |
| <i>PIP4K2C</i> | 2 | 0.000307201 |
| <i>YWHAB</i>   | 0 | 0.000347595 |
| <i>SCG5</i>    | 7 | 0.0000246   |
| <i>MS4A6E</i>  | 7 | 0.000167296 |
| <i>MS4A7</i>   | 0 | 0.00004     |
| <i>MS4A14</i>  | 2 | 0.0000267   |
| <i>EPB42</i>   | 4 | 0.000172536 |
| <i>SMAD3</i>   | 2 | 0.000182807 |
| <i>MAP1A</i>   | 4 | 0.0000707   |
| <i>MAPRE2</i>  | 2 | 0.000264142 |
| <i>EVA1C</i>   | 2 | 0.0000757   |
| <i>TCP10L2</i> | 7 | 0.000313512 |
| <i>MARS1</i>   | 1 | 0.000340566 |
| <i>PDIA3</i>   | 2 | 0.000279116 |
| <i>DUSP18</i>  | 1 | 0.000153049 |
| <i>TEF</i>     | 2 | 0.0000952   |
| <i>MEI1</i>    | 2 | 0.00020085  |
| <i>GNGT2</i>   | 3 | 0.0000403   |
| <i>TTC16</i>   | 3 | 0.0000787   |
| <i>FAM102A</i> | 1 | 0.0000711   |
| <i>GOLGA2</i>  | 0 | 0.000215285 |
| <i>COQ4</i>    | 2 | 0.000212463 |

|                |    |             |
|----------------|----|-------------|
| <i>SLC27A4</i> | 1  | 0.000143639 |
| <i>URM1</i>    | 2  | 0.000160293 |
| <i>CCDC103</i> | 7  | 0.0000508   |
| <i>ENDOG</i>   | 3  | 0.0000443   |
| <i>GPRC5B</i>  | 7  | 0.000243788 |
| <i>CRK</i>     | 0  | 0.000344993 |
| <i>RNF214</i>  | 2  | 0.000225146 |
| <i>DPEP2</i>   | 1  | 0.000178285 |
| <i>DUS2</i>    | 0  | 0.000153141 |
| <i>MYO5B</i>   | 7  | 0.000280842 |
| <i>OR51B5</i>  | 7  | 0.000163002 |
| <i>PRRT2</i>   | 7  | 0.000111467 |
| <i>ZNF23</i>   | 3  | 0.000186984 |
| <i>ZNF668</i>  | 1  | 0.0000951   |
| <i>ZNF646</i>  | 1  | 0.000264296 |
| <i>VKORC1</i>  | 3  | 0.0000948   |
| <i>CA4</i>     | 0  | 0.0000311   |
| <i>TPM4</i>    | 0  | 0.00013966  |
| <i>GPX4</i>    | 3  | 0.0000607   |
| <i>JSRP1</i>   | 4  | 0.0000259   |
| <i>NIBAN3</i>  | 11 | 0.000187878 |
| <i>KLHL26</i>  | 1  | 0.000150834 |
| <i>CDT1</i>    | 7  | 0.000081    |
| <i>PROCA1</i>  | 1  | 0.0000854   |
| <i>RPL13</i>   | 3  | 0.000100071 |
| <i>ZNF641</i>  | 0  | 0.0000842   |
| <i>CACNB3</i>  | 7  | 0.0000378   |
| <i>DHRS13</i>  | 0  | 0.0000843   |
| <i>TUBA1A</i>  | 0  | 0.000174484 |
| <i>TUBA1C</i>  | 0  | 0.0000914   |
| <i>SERTAD3</i> | 0  | 0.000137078 |
| <i>RAB4B</i>   | 1  | 0.0000909   |
| <i>GPD1</i>    | 7  | 0.000290177 |

|                 |   |             |
|-----------------|---|-------------|
| <i>PROSER3</i>  | 1 | 0.000114106 |
| <i>CYP2S1</i>   | 7 | 0.0000327   |
| <i>NFKBID</i>   | 1 | 0.000159141 |
| <i>TRAPPC9</i>  | 2 | 0.000209852 |
| <i>NLRP7</i>    | 7 | 0.00025857  |
| <i>ZNF283</i>   | 3 | 0.000301013 |
| <i>PPP1R14A</i> | 7 | 0.0000236   |
| <i>SPINT2</i>   | 0 | 0.000162364 |
| <i>PSCA</i>     | 7 | 0.0000912   |
| <i>DAPK3</i>    | 0 | 0.000192885 |
| <i>CHAF1A</i>   | 1 | 0.0000904   |
| <i>UBXN6</i>    | 4 | 0.000167924 |
| <i>HDGFL2</i>   | 0 | 0.000118089 |
| <i>PLIN4</i>    | 1 | 0.0000684   |
| <i>SEMA6B</i>   | 7 | 0.0000961   |
| <i>TLCD3A</i>   | 7 | 0.000027    |
| <i>MFSD3</i>    | 3 | 0.0000938   |
| <i>GPT</i>      | 7 | 0.000259354 |
| <i>SLC43A2</i>  | 1 | 0.000207504 |
| <i>RILP</i>     | 4 | 0.000156361 |
| <i>TRPV3</i>    | 7 | 0.000299109 |
| <i>ZNF83</i>    | 3 | 0.0000553   |
| <i>CD320</i>    | 1 | 0.0000289   |
| <i>SPRYD3</i>   | 1 | 0.000214778 |
| <i>SOAT2</i>    | 7 | 0.0000977   |
| <i>PRDX2</i>    | 4 | 0.0000992   |
| <i>CD300C</i>   | 1 | 0.0000507   |
| <i>CD300A</i>   | 0 | 0.000159983 |
| <i>TMEM88</i>   | 1 | 0.0000866   |
| <i>TMC8</i>     | 1 | 0.000185802 |
| <i>MLST8</i>    | 3 | 0.000101973 |
| <i>DNASE1L2</i> | 1 | 0.0000258   |
| <i>NLRC3</i>    | 2 | 0.000237176 |

|                 |    |             |
|-----------------|----|-------------|
| <i>DDB1</i>     | 4  | 0.000101497 |
| <i>VPS37C</i>   | 1  | 0.000206618 |
| <i>BEST1</i>    | 1  | 0.000161124 |
| <i>FTH1</i>     | 1  | 0.0000249   |
| <i>BSCL2</i>    | 2  | 0.000160962 |
| <i>SLC3A2</i>   | 3  | 0.000234011 |
| <i>PLAAT5</i>   | 20 | 0.000176902 |
| <i>ATG16L2</i>  | 1  | 0.00020049  |
| <i>TTC21A</i>   | 1  | 0.0000422   |
| <i>ULK4</i>     | 2  | 0.000237107 |
| <i>FADD</i>     | 0  | 0.000239734 |
| <i>LTBP3</i>    | 1  | 0.0000758   |
| <i>NAALADL1</i> | 3  | 0.000113692 |
| <i>SAC3D1</i>   | 3  | 0.0000245   |
| <i>BATF2</i>    | 5  | 0.000160195 |
| <i>SF1</i>      | 2  | 0.000280204 |
| <i>CCDC88B</i>  | 1  | 0.00011541  |
| <i>SCARA5</i>   | 7  | 0.000130219 |
| <i>PNOC</i>     | 11 | 0.0000999   |
| <i>VASN</i>     | 7  | 0.000157676 |
| <i>RNF187</i>   | 4  | 0.0000477   |
| <i>DDIT4</i>    | 3  | 0.0000236   |
| <i>PTGDR</i>    | 3  | 0.0000624   |
| <i>TTC39C</i>   | 2  | 0.000270595 |
| <i>GLYCTK</i>   | 1  | 0.000253956 |
| <i>POLR2J3</i>  | 35 | 0.000154847 |
| <i>IRF2BP2</i>  | 3  | 0.000423794 |
| <i>KIF5C</i>    | 2  | 0.0000586   |
| <i>BMI1</i>     | 3  | 0.000185238 |
| <i>PXK</i>      | 0  | 0.000195311 |
| <i>H1-4</i>     | 3  | 0.0000364   |
| <i>KCTD6</i>    | 3  | 0.00035567  |
| <i>ACOX2</i>    | 7  | 0.000296775 |

|                |    |             |
|----------------|----|-------------|
| <i>CX3CR1</i>  | 3  | 0.0000373   |
| <i>SEPTIN2</i> | 3  | 0.000378026 |
| <i>MFSD2A</i>  | 1  | 0.0000251   |
| <i>TAP1</i>    | 5  | 0.00013454  |
| <i>MLKL</i>    | 0  | 0.000135657 |
| <i>RHOH</i>    | 3  | 0.000277185 |
| <i>TXNDC2</i>  | 7  | 0.0000239   |
| <i>RAB31</i>   | 0  | 0.00020282  |
| <i>REEP4</i>   | 1  | 0.0000243   |
| <i>BMP1</i>    | 1  | 0.000102241 |
| <i>CCDC110</i> | 7  | 0.000232865 |
| <i>CAVIN2</i>  | 4  | 0.000185056 |
| <i>MTCL1</i>   | 7  | 0.000269955 |
| <i>GFRA2</i>   | 7  | 0.000153708 |
| <i>SLC20A2</i> | 2  | 0.000342258 |
| <i>DYNLRB2</i> | 7  | 0.0000926   |
| <i>ADAM29</i>  | 11 | 0.0000913   |
| <i>STAT3</i>   | 1  | 0.000244225 |
| <i>ZSWIM1</i>  | 1  | 0.000123118 |
| <i>ADAM9</i>   | 0  | 0.000208587 |
| <i>AXIN2</i>   | 2  | 0.0000446   |
| <i>LRATD2</i>  | 3  | 0.000138568 |
| <i>LDLRAD4</i> | 2  | 0.000284535 |
| <i>IL7R</i>    | 3  | 0.000150556 |
| <i>PKIG</i>    | 11 | 0.000097    |
| <i>TET2</i>    | 0  | 0.000223733 |
| <i>TCTN2</i>   | 2  | 0.0000309   |
| <i>PPIP5K1</i> | 2  | 0.000240637 |
| <i>TSPAN5</i>  | 4  | 0.000258717 |
| <i>ABHD15</i>  | 3  | 0.000256318 |
| <i>ZBTB5</i>   | 3  | 0.000357811 |
| <i>VAMP5</i>   | 5  | 0.0000267   |
| <i>LRRC28</i>  | 2  | 0.000288965 |

|                 |    |             |
|-----------------|----|-------------|
| <i>LGALS9</i>   | 1  | 0.0000658   |
| <i>ATP5ME</i>   | 3  | 0.0000392   |
| <i>SLC49A3</i>  | 1  | 0.0000505   |
| <i>COL4A3</i>   | 11 | 0.0000953   |
| <i>MAP2K1</i>   | 2  | 0.000358182 |
| <i>HNRNPH1</i>  | 3  | 0.000326689 |
| <i>MECP2</i>    | 1  | 0.000224151 |
| <i>AR</i>       | 7  | 0.0000396   |
| <i>HSPBAP1</i>  | 0  | 0.000186231 |
| <i>FAM110B</i>  | 7  | 0.00017021  |
| <i>ZNF354A</i>  | 0  | 0.0000419   |
| <i>NPIP12</i>   | 2  | 0.0000239   |
| <i>CD2BP2</i>   | 0  | 0.000319837 |
| <i>RGS14</i>    | 1  | 0.000216262 |
| <i>TBC1D10B</i> | 1  | 0.000222575 |
| <i>GCSAML</i>   | 23 | 0.000179366 |
| <i>RAB24</i>    | 0  | 0.0000818   |
| <i>PRELID1</i>  | 0  | 0.000179871 |
| <i>THBS3</i>    | 1  | 0.000135543 |
| <i>CA5B</i>     | 3  | 0.000185983 |
| <i>SH3TC2</i>   | 4  | 0.000188728 |
| <i>ZRSR2</i>    | 3  | 0.000100122 |
| <i>ADRB2</i>    | 3  | 0.0000743   |
| <i>GPRIN1</i>   | 7  | 0.000178545 |
| <i>HSPB3</i>    | 7  | 0.0000242   |
| <i>KCNAB1</i>   | 7  | 0.000290656 |
| <i>PGM2</i>     | 0  | 0.000229729 |
| <i>P2RY12</i>   | 4  | 0.0000771   |
| <i>CRADD</i>    | 2  | 0.000291067 |
| <i>ARL13B</i>   | 3  | 0.0002168   |
| <i>PTK2</i>     | 2  | 0.0000407   |
| <i>RSPH10B2</i> | 7  | 0.000126041 |
| <i>PTAFR</i>    | 0  | 0.000127831 |

|               |    |             |
|---------------|----|-------------|
| <i>MMGT1</i>  | 3  | 0.000197814 |
| <i>HTRA4</i>  | 2  | 0.0000255   |
| <i>CLIC4</i>  | 3  | 0.0000497   |
| <i>ZEB2</i>   | 2  | 0.000195965 |
| <i>DTWD2</i>  | 3  | 0.000251444 |
| <i>VPREB1</i> | 7  | 0.000130358 |
| <i>INO80E</i> | 2  | 0.000150206 |
| <i>CKAP2L</i> | 14 | 0.000189341 |
| <i>CHRNA5</i> | 7  | 0.00013034  |
| <i>AGPAT2</i> | 0  | 0.000134534 |
| <i>GP9</i>    | 4  | 0.0000825   |
| <i>MT1E</i>   | 14 | 0.000136655 |
| <i>DUS1L</i>  | 3  | 0.000181724 |
| <i>RFNG</i>   | 1  | 0.000127547 |
| <i>DCXR</i>   | 3  | 0.0000931   |
| <i>ZNF32</i>  | 3  | 0.000174804 |
| <i>RAC3</i>   | 7  | 0.0000685   |
| <i>LIMS1</i>  | 0  | 0.000159698 |
| <i>BTD</i>    | 2  | 0.000372634 |
| <i>ROBO1</i>  | 7  | 0.0000262   |
| <i>P2RY1</i>  | 4  | 0.0000313   |
| <i>AHSP</i>   | 4  | 0.0000412   |
| <i>CALML6</i> | 7  | 0.000202513 |
| <i>REPS2</i>  | 0  | 0.000133215 |
| <i>SYAP1</i>  | 0  | 0.000252083 |
| <i>ITGAM</i>  | 1  | 0.000170584 |
| <i>TPST1</i>  | 0  | 0.0000289   |
| <i>TM4SF1</i> | 7  | 0.0000822   |
| <i>OTUD7A</i> | 2  | 0.0000344   |
| <i>BRD3</i>   | 1  | 0.000329158 |
| <i>KLF13</i>  | 1  | 0.000319123 |
| <i>ZNF764</i> | 1  | 0.000204787 |
| <i>ZNF768</i> | 0  | 0.000113856 |

|                   |    |             |
|-------------------|----|-------------|
| <i>TAS1R3</i>     | 7  | 0.0000623   |
| <i>TMEM42</i>     | 3  | 0.000274864 |
| <i>MAP3K2</i>     | 0  | 0.000216255 |
| <i>PUSL1</i>      | 1  | 0.0000859   |
| <i>ZNF35</i>      | 3  | 0.000210867 |
| <i>IFFO2</i>      | 3  | 0.000167239 |
| <i>TMEM154</i>    | 0  | 0.000236072 |
| <i>ALCAM</i>      | 0  | 0.000104659 |
| <i>UBE2E3</i>     | 3  | 0.000160053 |
| <i>CNTROB</i>     | 2  | 0.000205692 |
| <i>TRAPPC1</i>    | 1  | 0.0000507   |
| <i>SIK2</i>       | 2  | 0.00030687  |
| <i>GYP A</i>      | 4  | 0.0000593   |
| <i>SLC16A5</i>    | 1  | 0.000190893 |
| <i>ANKK1</i>      | 7  | 0.0000249   |
| <i>ADPRM</i>      | 3  | 0.000149857 |
| <i>USP50</i>      | 7  | 0.0000478   |
| <i>FAM161A</i>    | 3  | 0.0000976   |
| <i>ZNF282</i>     | 1  | 0.000257179 |
| <i>CRTAP</i>      | 3  | 0.000219752 |
| <i>GABARAP</i>    | 0  | 0.000114046 |
| <i>STX8</i>       | 3  | 0.000293845 |
| <i>UBB</i>        | 4  | 0.0000508   |
| <i>NFRKB</i>      | 2  | 0.000305076 |
| <i>FABP4</i>      | 7  | 0.0000598   |
| <i>PRDM10</i>     | 2  | 0.000402253 |
| <i>SLC30A1</i>    | 3  | 0.00010068  |
| <i>GPRC5C</i>     | 7  | 0.000207295 |
| <i>TMEM182</i>    | 3  | 0.000213822 |
| <i>MGMT</i>       | 3  | 0.000209073 |
| <i>AC021066.1</i> | 7  | 0.000238972 |
| <i>DENND5B</i>    | 11 | 0.000155819 |
| <i>CD14</i>       | 0  | 0.0000381   |

|                 |    |             |
|-----------------|----|-------------|
| <i>DNAJC18</i>  | 3  | 0.000116678 |
| <i>MZB1</i>     | 15 | 0.000201145 |
| <i>SLC23A1</i>  | 7  | 0.000266351 |
| <i>NPAS2</i>    | 7  | 0.00023106  |
| <i>KRT72</i>    | 36 | 0.000154847 |
| <i>LONRF2</i>   | 7  | 0.000286888 |
| <i>PA2G4</i>    | 4  | 0.0000962   |
| <i>ELOVL6</i>   | 3  | 0.0000711   |
| <i>PFKFB3</i>   | 1  | 0.0000612   |
| <i>ARL6IP1</i>  | 3  | 0.0000999   |
| <i>SERPINB9</i> | 2  | 0.000154842 |
| <i>STAT2</i>    | 5  | 0.000175784 |
| <i>ZNF16</i>    | 3  | 0.00030228  |
| <i>CAVIN4</i>   | 7  | 0.000171001 |
| <i>HOXB9</i>    | 7  | 0.000251877 |
| <i>AKAP13</i>   | 0  | 0.000278092 |
| <i>CDCA4</i>    | 3  | 0.00017424  |
| <i>USP32</i>    | 0  | 0.00026647  |
| <i>CEL</i>      | 7  | 0.000235581 |
| <i>GPR27</i>    | 0  | 0.0000658   |
| <i>LSM3</i>     | 3  | 0.0000756   |
| <i>KIAA0232</i> | 0  | 0.000267355 |
| <i>MTSS1</i>    | 2  | 0.0000659   |
| <i>TMEM43</i>   | 0  | 0.000294216 |
| <i>RPS9</i>     | 3  | 0.000122165 |
| <i>PLA2G1B</i>  | 7  | 0.0000482   |
| <i>TSEN34</i>   | 0  | 0.000187347 |
| <i>NDUFA3</i>   | 3  | 0.0000359   |
| <i>OSCAR</i>    | 1  | 0.0000526   |
| <i>PAQR8</i>    | 2  | 0.000210446 |
| <i>NUDT6</i>    | 3  | 0.0000741   |
| <i>TANC2</i>    | 0  | 0.000145988 |
| <i>ZNF160</i>   | 3  | 0.000341919 |

|                 |   |             |
|-----------------|---|-------------|
| <i>CEACAM3</i>  | 1 | 0.000125801 |
| <i>PDGFD</i>    | 3 | 0.0000637   |
| <i>S1PR1</i>    | 3 | 0.000231579 |
| <i>PKIA</i>     | 3 | 0.0000754   |
| <i>XKR6</i>     | 2 | 0.00019184  |
| <i>TSNARE1</i>  | 1 | 0.000106067 |
| <i>FPR2</i>     | 0 | 0.0000888   |
| <i>FPR1</i>     | 0 | 0.0000931   |
| <i>C11orf24</i> | 2 | 0.000106841 |
| <i>INSR</i>     | 1 | 0.0000889   |
| <i>KCNMB3</i>   | 3 | 0.0000699   |
| <i>KCNG3</i>    | 7 | 0.000238195 |
| <i>ATP6V0E2</i> | 2 | 0.000128882 |
| <i>PRKCE</i>    | 2 | 0.00009     |
| <i>MORN4</i>    | 7 | 0.0000243   |
| <i>ZNF692</i>   | 2 | 0.000213541 |
| <i>NAIF1</i>    | 0 | 0.000332073 |
| <i>RBKS</i>     | 3 | 0.0000531   |
| <i>TMEM126A</i> | 3 | 0.00015067  |
| <i>TRIM8</i>    | 1 | 0.000238079 |
| <i>NETO2</i>    | 3 | 0.0000253   |
| <i>JUNB</i>     | 0 | 0.0000567   |
| <i>TMEM37</i>   | 7 | 0.000269765 |
| <i>LRG1</i>     | 0 | 0.0000555   |
| <i>ZNF440</i>   | 3 | 0.000293401 |
| <i>GAA</i>      | 1 | 0.0000916   |
| <i>CHST11</i>   | 0 | 0.000248081 |
| <i>PGAM1</i>    | 0 | 0.000212159 |
| <i>CHD7</i>     | 2 | 0.000225712 |
| <i>LURAP1</i>   | 7 | 0.0000489   |
| <i>CLCN5</i>    | 2 | 0.000156947 |
| <i>KCND3</i>    | 7 | 0.0000491   |
| <i>ZNF581</i>   | 1 | 0.0000554   |

|                 |    |             |
|-----------------|----|-------------|
| <i>POLR1C</i>   | 3  | 0.000343597 |
| <i>ASXL1</i>    | 2  | 0.000328603 |
| <i>ZNF318</i>   | 2  | 0.000250408 |
| <i>WIPF2</i>    | 1  | 0.000219612 |
| <i>HOPX</i>     | 3  | 0.0000574   |
| <i>LRRC8C</i>   | 3  | 0.000264255 |
| <i>SPACA5</i>   | 7  | 0.0000271   |
| <i>LRRC8D</i>   | 3  | 0.000385683 |
| <i>OR1L8</i>    | 7  | 0.000134933 |
| <i>PPID</i>     | 0  | 0.000301652 |
| <i>COL24A1</i>  | 7  | 0.0000798   |
| <i>PTGER4</i>   | 0  | 0.00025854  |
| <i>BCL2L1</i>   | 4  | 0.000223494 |
| <i>NMUR1</i>    | 3  | 0.00010132  |
| <i>CXXC5</i>    | 2  | 0.0000668   |
| <i>PTCRA</i>    | 4  | 0.000229358 |
| <i>SLC25A33</i> | 3  | 0.000203103 |
| <i>P2RY6</i>    | 7  | 0.000029    |
| <i>S100Z</i>    | 2  | 0.0000545   |
| <i>ZIK1</i>     | 3  | 0.000160476 |
| <i>GPR82</i>    | 22 | 0.000154847 |
| <i>PLEKHG5</i>  | 7  | 0.000197651 |
| <i>GPHN</i>     | 2  | 0.00015229  |
| <i>SPATA5L1</i> | 0  | 0.000144121 |
| <i>SYCE1</i>    | 7  | 0.000134826 |
| <i>RASGRP4</i>  | 1  | 0.000128433 |
| <i>NHLH1</i>    | 7  | 0.000173606 |
| <i>BCL2</i>     | 3  | 0.000157764 |
| <i>CTPS1</i>    | 2  | 0.000282434 |
| <i>KNDC1</i>    | 7  | 0.0000475   |
| <i>MLLT3</i>    | 3  | 0.000200114 |
| <i>FAM90A1</i>  | 7  | 0.000209042 |
| <i>RRM2</i>     | 14 | 0.000189098 |

|                |    |             |
|----------------|----|-------------|
| <i>RPS21</i>   | 3  | 0.0000512   |
| <i>PTEN</i>    | 0  | 0.000179771 |
| <i>RNASEH1</i> | 2  | 0.000380809 |
| <i>ZNF217</i>  | 0  | 0.000314125 |
| <i>SRGAP2C</i> | 0  | 0.0000285   |
| <i>CYP4F22</i> | 7  | 0.0000241   |
| <i>DRC3</i>    | 7  | 0.000209238 |
| <i>SHLD1</i>   | 3  | 0.0000353   |
| <i>JMJD1C</i>  | 0  | 0.000220749 |
| <i>LDHAL6B</i> | 7  | 0.000211271 |
| <i>ZNF556</i>  | 7  | 0.000241962 |
| <i>MAL</i>     | 3  | 0.0000399   |
| <i>ZNF554</i>  | 2  | 0.000162196 |
| <i>RAB33B</i>  | 0  | 0.000162886 |
| <i>EPHX4</i>   | 7  | 0.0000481   |
| <i>ORMDL3</i>  | 3  | 0.0000508   |
| <i>KLF11</i>   | 2  | 0.0000656   |
| <i>SMN1</i>    | 3  | 0.0000853   |
| <i>EIF2AK3</i> | 3  | 0.000316504 |
| <i>CD8B</i>    | 3  | 0.0000336   |
| <i>SLFN12</i>  | 0  | 0.0000739   |
| <i>SLC9C1</i>  | 7  | 0.000149677 |
| <i>FRMD3</i>   | 5  | 0.0000302   |
| <i>SNTB1</i>   | 2  | 0.000200977 |
| <i>OR4X2</i>   | 7  | 0.0000671   |
| <i>CXCR6</i>   | 3  | 0.0000364   |
| <i>CEBPB</i>   | 0  | 0.0000637   |
| <i>AZU1</i>    | 10 | 0.000102597 |
| <i>TPSAB1</i>  | 7  | 0.0000739   |
| <i>CLEC7A</i>  | 0  | 0.000160498 |
| <i>DPAGT1</i>  | 2  | 0.000148142 |
| <i>BSG</i>     | 4  | 0.00018073  |
| <i>HINFP</i>   | 2  | 0.00029053  |

|                |    |             |
|----------------|----|-------------|
| <i>CERS6</i>   | 3  | 0.000304814 |
| <i>COPRS</i>   | 3  | 0.000082    |
| <i>CLEC12A</i> | 37 | 0.000154847 |
| <i>BPGM</i>    | 4  | 0.000158578 |
| <i>POP7</i>    | 3  | 0.0000935   |
| <i>ALG14</i>   | 3  | 0.000115779 |
| <i>STARD5</i>  | 2  | 0.0000472   |
| <i>CSDC2</i>   | 7  | 0.000219484 |
| <i>GNB2</i>    | 1  | 0.000190872 |
| <i>OR5B12</i>  | 7  | 0.0000239   |
| <i>OR5B2</i>   | 7  | 0.0000246   |
| <i>PDZD3</i>   | 7  | 0.00017149  |
| <i>PRSS27</i>  | 7  | 0.000285907 |
| <i>SYNPO2</i>  | 7  | 0.0000242   |
| <i>FGGY</i>    | 0  | 0.0000874   |
| <i>ACOT12</i>  | 7  | 0.000277602 |
| <i>CARNS1</i>  | 1  | 0.0000558   |
| <i>PPP1CA</i>  | 0  | 0.000175254 |
| <i>NIPAL4</i>  | 7  | 0.000162715 |
| <i>MUCL1</i>   | 7  | 0.000230002 |
| <i>PDE3A</i>   | 4  | 0.000135037 |
| <i>RASGRP1</i> | 3  | 0.000270939 |
| <i>KLHL6</i>   | 2  | 0.000290063 |
| <i>SMPDL3A</i> | 0  | 0.0000294   |
| <i>RND1</i>    | 7  | 0.000244254 |
| <i>AGAP5</i>   | 2  | 0.000123043 |
| <i>ZFAND4</i>  | 3  | 0.000204215 |
| <i>THEMIS</i>  | 3  | 0.0000958   |
| <i>CORO1B</i>  | 3  | 0.000194285 |
| <i>TMEM217</i> | 7  | 0.0000277   |
| <i>TMCC1</i>   | 0  | 0.000169563 |
| <i>EFCAB12</i> | 7  | 0.0000321   |
| <i>RAB43</i>   | 1  | 0.0000774   |

|                 |   |             |
|-----------------|---|-------------|
| <i>CBWD1</i>    | 3 | 0.000145837 |
| <i>HOXC5</i>    | 7 | 0.0000686   |
| <i>RAB37</i>    | 0 | 0.000173525 |
| <i>DCP2</i>     | 0 | 0.000239579 |
| <i>SNX32</i>    | 7 | 0.000223031 |
| <i>RPL38</i>    | 3 | 0.0000769   |
| <i>RARG</i>     | 1 | 0.000125478 |
| <i>SSH3</i>     | 1 | 0.000169869 |
| <i>SP3</i>      | 0 | 0.000241402 |
| <i>KRT2</i>     | 7 | 0.00026397  |
| <i>METAP1D</i>  | 2 | 0.000169511 |
| <i>NBEA</i>     | 3 | 0.0000402   |
| <i>ANKRD13D</i> | 1 | 0.000229487 |
| <i>MYD88</i>    | 1 | 0.00012225  |
| <i>OXSR1</i>    | 0 | 0.000355279 |
| <i>SLC22A13</i> | 7 | 0.000178069 |
| <i>LCLAT1</i>   | 2 | 0.0000976   |
| <i>KAT5</i>     | 0 | 0.000329802 |
| <i>GXYLT2</i>   | 7 | 0.000242101 |
| <i>ARPP21</i>   | 7 | 0.000199901 |
| <i>EVC2</i>     | 7 | 0.0000237   |
| <i>HECTD4</i>   | 2 | 0.000224573 |
| <i>FAM222B</i>  | 1 | 0.000108103 |
| <i>BNC2</i>     | 3 | 0.0000476   |
| <i>RXFP4</i>    | 7 | 0.000105976 |
| <i>HSPA6</i>    | 0 | 0.000103508 |
| <i>ADCK5</i>    | 1 | 0.000117175 |
| <i>MTX1</i>     | 0 | 0.000135987 |
| <i>PARP14</i>   | 5 | 0.000158335 |
| <i>PARP15</i>   | 2 | 0.000170036 |
| <i>CKS1B</i>    | 3 | 0.000104154 |
| <i>ABCD2</i>    | 3 | 0.000135666 |
| <i>TUBB8B</i>   | 7 | 0.0000236   |

|                  |    |             |
|------------------|----|-------------|
| <i>MFSD4B</i>    | 2  | 0.00035253  |
| <i>VANGL1</i>    | 2  | 0.0000275   |
| <i>GLRX</i>      | 0  | 0.00015696  |
| <i>GOLGB1</i>    | 0  | 0.000275626 |
| <i>GPR137</i>    | 1  | 0.000113289 |
| <i>SNCG</i>      | 7  | 0.000176003 |
| <i>MZT2A</i>     | 3  | 0.0000796   |
| <i>ZNF449</i>    | 3  | 0.000278743 |
| <i>PPP1R3B</i>   | 0  | 0.000171322 |
| <i>MAP3K11</i>   | 1  | 0.000240488 |
| <i>TRIB1</i>     | 0  | 0.0000882   |
| <i>KCNK7</i>     | 1  | 0.0000241   |
| <i>C1QB</i>      | 38 | 0.000154847 |
| <i>C1QA</i>      | 38 | 0.000154847 |
| <i>IQCF1</i>     | 7  | 0.000217222 |
| <i>OLR1</i>      | 10 | 0.000184422 |
| <i>DAB1</i>      | 7  | 0.0000374   |
| <i>EHBP1L1</i>   | 1  | 0.000188601 |
| <i>PPP1R14B</i>  | 3  | 0.0000683   |
| <i>ZNRD2</i>     | 3  | 0.0000729   |
| <i>VEGFB</i>     | 1  | 0.0000295   |
| <i>TNFRSF10D</i> | 2  | 0.000188599 |
| <i>MST1</i>      | 2  | 0.0000287   |
| <i>TNFRSF10C</i> | 0  | 0.000152455 |
| <i>SNX33</i>     | 1  | 0.000110257 |
| <i>NABP1</i>     | 0  | 0.000178732 |
| <i>ADGRF3</i>    | 3  | 0.0000275   |
| <i>CCDC106</i>   | 7  | 0.0000274   |
| <i>CEP83</i>     | 3  | 0.000299219 |
| <i>SULT1B1</i>   | 0  | 0.0000915   |
| <i>NUDT4</i>     | 4  | 0.000123697 |
| <i>PC</i>        | 7  | 0.000137126 |
| <i>UGT2A1</i>    | 7  | 0.00010448  |

|                   |    |             |
|-------------------|----|-------------|
| <i>NMNAT1</i>     | 0  | 0.000291346 |
| <i>TRAPPC3L</i>   | 4  | 0.0000435   |
| <i>SLC19A1</i>    | 1  | 0.000187079 |
| <i>EIF1AX</i>     | 3  | 0.0000588   |
| <i>C11orf80</i>   | 11 | 0.000142848 |
| <i>STAT5B</i>     | 1  | 0.000261011 |
| <i>CD7</i>        | 1  | 0.0000408   |
| <i>CNP</i>        | 1  | 0.0000507   |
| <i>EIF1</i>       | 0  | 0.0000391   |
| <i>TIGD3</i>      | 1  | 0.0000405   |
| <i>NET1</i>       | 3  | 0.0000501   |
| <i>DPY19L1</i>    | 3  | 0.000168636 |
| <i>AC013489.1</i> | 3  | 0.0000299   |
| <i>PHOSPHO1</i>   | 4  | 0.000053    |
| <i>GPR160</i>     | 0  | 0.0000818   |
| <i>SWSAP1</i>     | 0  | 0.0000808   |
| <i>SLCO4C1</i>    | 0  | 0.0000822   |
| <i>TCAP</i>       | 1  | 0.0000409   |
| <i>CCS</i>        | 4  | 0.000109676 |
| <i>CEP19</i>      | 0  | 0.000100723 |
| <i>GNG5</i>       | 0  | 0.0000729   |
| <i>CTSF</i>       | 2  | 0.0000385   |
| <i>TLR10</i>      | 3  | 0.0000332   |
| <i>TLR1</i>       | 0  | 0.000154554 |
| <i>TLR6</i>       | 0  | 0.000182882 |
| <i>FAM174A</i>    | 0  | 0.000111281 |
| <i>FAM53A</i>     | 7  | 0.0000713   |
| <i>ZDHHC24</i>    | 1  | 0.000270458 |
| <i>SELP</i>       | 4  | 0.000234112 |
| <i>CTU2</i>       | 1  | 0.0000466   |
| <i>C12orf66</i>   | 3  | 0.000306179 |
| <i>REP15</i>      | 7  | 0.0000268   |
| <i>PITPNA</i>     | 1  | 0.000174081 |

|                 |    |             |
|-----------------|----|-------------|
| <i>ZBTB4</i>    | 1  | 0.000217278 |
| <i>TNK1</i>     | 7  | 0.0000376   |
| <i>ZHX3</i>     | 2  | 0.000197803 |
| <i>SLC16A11</i> | 7  | 0.000146593 |
| <i>SLC16A13</i> | 1  | 0.0000748   |
| <i>PODN</i>     | 7  | 0.000049    |
| <i>C11orf45</i> | 7  | 0.000029    |
| <i>TRHR</i>     | 7  | 0.00018648  |
| <i>ATP2A2</i>   | 2  | 0.00030315  |
| <i>ZWILCH</i>   | 3  | 0.000129283 |
| <i>CNTNAP2</i>  | 11 | 0.0000574   |
| <i>BBS1</i>     | 2  | 0.0000661   |
| <i>GCSAM</i>    | 3  | 0.0000919   |
| <i>MFSD4A</i>   | 7  | 0.000047    |
| <i>PELI3</i>    | 1  | 0.0000839   |
| <i>TMEM81</i>   | 0  | 0.000320969 |
| <i>IL20RB</i>   | 2  | 0.0000397   |
| <i>GOLT1A</i>   | 7  | 0.00016151  |
| <i>ZNF497</i>   | 2  | 0.0000287   |
| <i>CMKLR1</i>   | 3  | 0.0000392   |
| <i>UGT8</i>     | 11 | 0.000119446 |
| <i>IQCK</i>     | 7  | 0.000189558 |
| <i>SLC29A2</i>  | 1  | 0.0000856   |
| <i>B4GAT1</i>   | 3  | 0.0000486   |
| <i>TMEM167A</i> | 3  | 0.000195786 |
| <i>SH3PXD2B</i> | 7  | 0.0000641   |
| <i>RESF1</i>    | 0  | 0.000161665 |
| <i>LARP7</i>    | 3  | 0.000140453 |
| <i>BRMS1</i>    | 0  | 0.00019483  |
| <i>HRAS</i>     | 1  | 0.0000474   |
| <i>WDR49</i>    | 0  | 0.0000596   |
| <i>ODAPH</i>    | 7  | 0.000129216 |
| <i>PDZK1</i>    | 7  | 0.0000639   |

|                 |    |             |
|-----------------|----|-------------|
| <i>GLMN</i>     | 3  | 0.00026109  |
| <i>NLRP6</i>    | 1  | 0.0000245   |
| <i>NDUFA11</i>  | 3  | 0.0000267   |
| <i>CATSPERD</i> | 7  | 0.000294087 |
| <i>RAB1B</i>    | 1  | 0.000183803 |
| <i>P2RY14</i>   | 5  | 0.000146197 |
| <i>AMZ1</i>     | 7  | 0.0000338   |
| <i>GPR171</i>   | 3  | 0.000073    |
| <i>FBXW8</i>    | 2  | 0.0000967   |
| <i>KLC2</i>     | 1  | 0.000185328 |
| <i>SLC22A1</i>  | 1  | 0.0000799   |
| <i>CTBP2</i>    | 0  | 0.000267993 |
| <i>CHST2</i>    | 3  | 0.0000541   |
| <i>ZDHHC14</i>  | 2  | 0.0000352   |
| <i>GK5</i>      | 3  | 0.000130874 |
| <i>MARCKSL1</i> | 1  | 0.0000291   |
| <i>SH3BP5L</i>  | 0  | 0.000274616 |
| <i>YPEL2</i>    | 2  | 0.000394434 |
| <i>PSMD2</i>    | 0  | 0.000283554 |
| <i>PARL</i>     | 2  | 0.000215357 |
| <i>DDIT3</i>    | 0  | 0.000123926 |
| <i>PCCA</i>     | 2  | 0.000273703 |
| <i>GOLGA8A</i>  | 2  | 0.0000575   |
| <i>TP53I11</i>  | 1  | 0.000101904 |
| <i>DOLK</i>     | 3  | 0.000261694 |
| <i>PHYHD1</i>   | 7  | 0.00020826  |
| <i>CATSPER1</i> | 3  | 0.0000266   |
| <i>CCNE2</i>    | 14 | 0.000228242 |
| <i>PHYKPL</i>   | 1  | 0.000299676 |
| <i>BANF1</i>    | 3  | 0.0000266   |
| <i>ARL10</i>    | 2  | 0.000218747 |
| <i>RFESD</i>    | 3  | 0.0000981   |
| <i>SART1</i>    | 0  | 0.00011375  |

|                 |    |             |
|-----------------|----|-------------|
| <i>MCTP1</i>    | 0  | 0.000184189 |
| <i>POLD4</i>    | 0  | 0.000182767 |
| <i>LRRC25</i>   | 1  | 0.000167761 |
| <i>CLCF1</i>    | 1  | 0.0000239   |
| <i>TSGA10IP</i> | 7  | 0.000158729 |
| <i>LIPT2</i>    | 3  | 0.0000737   |
| <i>KCNE3</i>    | 0  | 0.000210239 |
| <i>LONRF3</i>   | 2  | 0.000152926 |
| <i>UCP3</i>     | 2  | 0.000136224 |
| <i>PAAF1</i>    | 2  | 0.000341344 |
| <i>P2RY2</i>    | 13 | 0.000114857 |
| <i>FOSL1</i>    | 7  | 0.0000743   |
| <i>SUGCT</i>    | 3  | 0.00012046  |
| <i>OR4B1</i>    | 7  | 0.000188693 |
| <i>B3GNTL1</i>  | 1  | 0.000109339 |
| <i>AURKAIP1</i> | 0  | 0.000220132 |
| <i>TTLL11</i>   | 2  | 0.00016459  |
| <i>ZNF169</i>   | 2  | 0.00034617  |
| <i>MSRA</i>     | 2  | 0.000138303 |
| <i>CBLL2</i>    | 7  | 0.000029    |
| <i>CCDC168</i>  | 7  | 0.000250608 |
| <i>SWI5</i>     | 3  | 0.000133064 |
| <i>BAIAP2</i>   | 7  | 0.000105689 |
| <i>A2M</i>      | 7  | 0.000170634 |
| <i>DOK7</i>     | 7  | 0.0000724   |
| <i>UBE2O</i>    | 4  | 0.000114817 |
| <i>ORAI3</i>    | 0  | 0.000251504 |
| <i>ZNF613</i>   | 3  | 0.000150765 |
| <i>JAKMIP2</i>  | 3  | 0.0000394   |
| <i>TPRN</i>     | 1  | 0.00011791  |
| <i>CRYBG2</i>   | 7  | 0.0000278   |
| <i>SSNA1</i>    | 3  | 0.000147728 |
| <i>TCP11L1</i>  | 2  | 0.00015291  |

|                |    |             |
|----------------|----|-------------|
| <i>HSF5</i>    | 3  | 0.000106037 |
| <i>ACBD7</i>   | 7  | 0.00019461  |
| <i>SLC35G1</i> | 3  | 0.000120837 |
| <i>COX8A</i>   | 3  | 0.0000685   |
| <i>ZSCAN2</i>  | 3  | 0.000362437 |
| <i>RNPEP</i>   | 1  | 0.0000974   |
| <i>GJC3</i>    | 7  | 0.000222988 |
| <i>SPRYD4</i>  | 2  | 0.000226891 |
| <i>VPS37D</i>  | 7  | 0.000242306 |
| <i>SYNE3</i>   | 2  | 0.000297185 |
| <i>SLCO3A1</i> | 1  | 0.000264863 |
| <i>ZNF575</i>  | 7  | 0.000150919 |
| <i>WDR25</i>   | 2  | 0.000226853 |
| <i>DIRAS1</i>  | 7  | 0.000206601 |
| <i>PHLDB3</i>  | 2  | 0.0000504   |
| <i>USF3</i>    | 0  | 0.000311046 |
| <i>KBTBD11</i> | 0  | 0.0000924   |
| <i>B3GNT5</i>  | 0  | 0.0000624   |
| <i>LMNB2</i>   | 1  | 0.00016335  |
| <i>RNF152</i>  | 21 | 0.000129044 |
| <i>MYO1D</i>   | 2  | 0.0000772   |
| <i>LRRC37A</i> | 2  | 0.0000267   |
| <i>ACSF3</i>   | 2  | 0.000253663 |
| <i>PFN4</i>    | 7  | 0.0000239   |
| <i>CDK5R1</i>  | 0  | 0.0000236   |
| <i>NCKAP5</i>  | 7  | 0.00030088  |
| <i>RUFY1</i>   | 0  | 0.000127638 |
| <i>BASP1</i>   | 0  | 0.0000436   |
| <i>METRNL</i>  | 0  | 0.0000467   |
| <i>WSB2</i>    | 0  | 0.0000787   |
| <i>TCEANC</i>  | 3  | 0.0000516   |
| <i>PNMA1</i>   | 2  | 0.000204877 |
| <i>TCIM</i>    | 7  | 0.000191772 |

|                |    |             |
|----------------|----|-------------|
| <i>C8G</i>     | 7  | 0.0000289   |
| <i>EFCAB5</i>  | 7  | 0.0000588   |
| <i>GCNT4</i>   | 3  | 0.000109465 |
| <i>FAM89B</i>  | 0  | 0.0000243   |
| <i>SMCR8</i>   | 1  | 0.000372075 |
| <i>MTHFR</i>   | 1  | 0.000208481 |
| <i>FBXO46</i>  | 1  | 0.000130558 |
| <i>ACER2</i>   | 2  | 0.0000287   |
| <i>POLE</i>    | 2  | 0.000294127 |
| <i>PHETA2</i>  | 3  | 0.0000602   |
| <i>RHOG</i>    | 1  | 0.000193865 |
| <i>EPS8L2</i>  | 3  | 0.0000288   |
| <i>ZBTB34</i>  | 0  | 0.000251546 |
| <i>FAM9B</i>   | 7  | 0.0000691   |
| <i>TALDO1</i>  | 0  | 0.000133716 |
| <i>ULK1</i>    | 1  | 0.000139066 |
| <i>B3GNT8</i>  | 0  | 0.0000684   |
| <i>OR2T33</i>  | 7  | 0.0000312   |
| <i>KCNA3</i>   | 2  | 0.000110866 |
| <i>OR2AJ1</i>  | 7  | 0.0000981   |
| <i>FBXO39</i>  | 5  | 0.0000374   |
| <i>CLDN22</i>  | 39 | 0.000154847 |
| <i>BEND2</i>   | 4  | 0.0000938   |
| <i>LRRN4CL</i> | 7  | 0.000219549 |
| <i>TIMM22</i>  | 3  | 0.000402664 |
| <i>UMODL1</i>  | 7  | 0.000316122 |
| <i>SAMD9L</i>  | 5  | 0.000118812 |
| <i>PAWR</i>    | 11 | 0.000150529 |
| <i>CD19</i>    | 11 | 0.000175105 |
| <i>CAVIN1</i>  | 7  | 0.0000564   |
| <i>ZBED2</i>   | 7  | 0.000230092 |
| <i>ATOX1</i>   | 2  | 0.00025759  |
| <i>CD163</i>   | 0  | 0.0000278   |

|                 |    |             |
|-----------------|----|-------------|
| <i>C18orf32</i> | 0  | 0.000295727 |
| <i>ZNF491</i>   | 3  | 0.0000799   |
| <i>HASPIN</i>   | 14 | 0.0000794   |
| <i>GBA</i>      | 1  | 0.00016848  |
| <i>IL17RA</i>   | 1  | 0.000210104 |
| <i>AGTRAP</i>   | 1  | 0.000222761 |
| <i>NAALADL2</i> | 7  | 0.000147295 |
| <i>NECTIN3</i>  | 3  | 0.0000236   |
| <i>FLII</i>     | 1  | 0.000217017 |
| <i>HNRNPA0</i>  | 3  | 0.000236207 |
| <i>YIPF7</i>    | 7  | 0.0000444   |
| <i>CHID1</i>    | 4  | 0.0000984   |
| <i>ZNF620</i>   | 2  | 0.000229691 |
| <i>TMEM187</i>  | 3  | 0.000102185 |
| <i>SVBP</i>     | 4  | 0.0000356   |
| <i>GRB2</i>     | 0  | 0.000315151 |
| <i>CENPBD1</i>  | 0  | 0.00011248  |
| <i>RPS27</i>    | 3  | 0.0000456   |
| <i>RIC8A</i>    | 0  | 0.000300965 |
| <i>LCN15</i>    | 7  | 0.000226393 |
| <i>ODF3B</i>    | 5  | 0.0000528   |
| <i>CALHM5</i>   | 7  | 0.0000641   |
| <i>IMPDH2</i>   | 3  | 0.000242599 |
| <i>ALS2CL</i>   | 2  | 0.0000532   |
| <i>NDUFAF3</i>  | 3  | 0.00012586  |
| <i>GRAMD1C</i>  | 0  | 0.0000303   |
| <i>STAP2</i>    | 7  | 0.000263825 |
| <i>TSSK6</i>    | 3  | 0.0000571   |
| <i>PDE4DIP</i>  | 3  | 0.000175522 |
| <i>DDX10</i>    | 3  | 0.000328628 |
| <i>NDUFV2</i>   | 2  | 0.000306949 |
| <i>DALRD3</i>   | 3  | 0.000220758 |
| <i>PARD6G</i>   | 7  | 0.0000804   |

|                 |    |             |
|-----------------|----|-------------|
| <i>ZNF454</i>   | 7  | 0.000287246 |
| <i>ZC3H12D</i>  | 2  | 0.0000989   |
| <i>POGLUT3</i>  | 3  | 0.000159343 |
| <i>PLEC</i>     | 1  | 0.000101593 |
| <i>WDR6</i>     | 2  | 0.000254593 |
| <i>GEN1</i>     | 11 | 0.0000273   |
| <i>AQP11</i>    | 7  | 0.0000236   |
| <i>TMEM11</i>   | 1  | 0.000237592 |
| <i>KCNG2</i>    | 7  | 0.00017044  |
| <i>ZFAND2A</i>  | 0  | 0.000181024 |
| <i>PLEKHM3</i>  | 2  | 0.000307278 |
| <i>ZNF223</i>   | 3  | 0.0000707   |
| <i>CEP295NL</i> | 1  | 0.0000631   |
| <i>TUBAL3</i>   | 7  | 0.000249027 |
| <i>UCN3</i>     | 7  | 0.000245784 |
| <i>SLC25A20</i> | 0  | 0.0000607   |
| <i>CA8</i>      | 23 | 0.000133285 |
| <i>CD28</i>     | 3  | 0.000187702 |
| <i>MAF</i>      | 3  | 0.0000432   |
| <i>GPR35</i>    | 1  | 0.0000316   |
| <i>PARP10</i>   | 5  | 0.0000826   |
| <i>SUZ12</i>    | 3  | 0.00014626  |
| <i>GRINA</i>    | 4  | 0.0000643   |
| <i>THBD</i>     | 0  | 0.0000239   |
| <i>STX19</i>    | 7  | 0.0000248   |
| <i>ZHX2</i>     | 2  | 0.000240815 |
| <i>MPI</i>      | 2  | 0.000263946 |
| <i>EFCAB13</i>  | 3  | 0.0000235   |
| <i>EXOSC4</i>   | 3  | 0.000127131 |
| <i>TAF7</i>     | 3  | 0.000101767 |
| <i>PFAS</i>     | 1  | 0.000192927 |
| <i>HYI</i>      | 2  | 0.0000244   |
| <i>LGALS7B</i>  | 7  | 0.0000619   |

|                   |    |             |
|-------------------|----|-------------|
| <i>ZNF552</i>     | 0  | 0.000278754 |
| <i>SMIM10L2A</i>  | 7  | 0.000039    |
| <i>GAK</i>        | 1  | 0.000282267 |
| <i>SELENOW</i>    | 3  | 0.000191633 |
| <i>SNX18</i>      | 0  | 0.000198719 |
| <i>AURKB</i>      | 7  | 0.0000354   |
| <i>MRFAP1</i>     | 0  | 0.000134966 |
| <i>KLHDC7A</i>    | 7  | 0.000106671 |
| <i>TMEM107</i>    | 2  | 0.000133007 |
| <i>RRS1</i>       | 3  | 0.000176384 |
| <i>EXOC3L1</i>    | 5  | 0.000175824 |
| <i>IGSF22</i>     | 7  | 0.000224918 |
| <i>CCDC89</i>     | 3  | 0.0000449   |
| <i>DPM3</i>       | 3  | 0.0000567   |
| <i>C12orf42</i>   | 2  | 0.0000797   |
| <i>HTR1F</i>      | 7  | 0.0000277   |
| <i>TMTC2</i>      | 2  | 0.000115433 |
| <i>SPTY2D1</i>    | 0  | 0.000369698 |
| <i>SAMD4B</i>     | 1  | 0.000202086 |
| <i>GIMAP7</i>     | 3  | 0.0000887   |
| <i>EDC3</i>       | 2  | 0.000291078 |
| <i>FUCA1</i>      | 0  | 0.000102011 |
| <i>PXT1</i>       | 7  | 0.000122644 |
| <i>SIGLECL1</i>   | 7  | 0.000260776 |
| <i>MAGED1</i>     | 2  | 0.000123223 |
| <i>LDLRAD3</i>    | 1  | 0.0000295   |
| <i>SMCO3</i>      | 7  | 0.000132838 |
| <i>RAD23A</i>     | 4  | 0.0000789   |
| <i>GADD45GIP1</i> | 3  | 0.000104829 |
| <i>NSUN7</i>      | 0  | 0.0000357   |
| <i>RAB39A</i>     | 0  | 0.0000357   |
| <i>GATA2</i>      | 23 | 0.0000709   |
| <i>TMEM31</i>     | 7  | 0.000097    |

|                 |    |             |
|-----------------|----|-------------|
| <i>EGR3</i>     | 25 | 0.0000942   |
| <i>GPC5</i>     | 7  | 0.000224984 |
| <i>GEMIN4</i>   | 2  | 0.000292367 |
| <i>ZBTB18</i>   | 0  | 0.000260164 |
| <i>C14orf28</i> | 3  | 0.000227534 |
| <i>SHARPIN</i>  | 4  | 0.0000939   |
| <i>DNHD1</i>    | 2  | 0.000165307 |
| <i>SLITRK4</i>  | 0  | 0.0000258   |
| <i>GCC1</i>     | 0  | 0.000333403 |
| <i>LSMEM2</i>   | 7  | 0.0000472   |
| <i>RNF151</i>   | 7  | 0.0000391   |
| <i>ZFPM1</i>    | 1  | 0.0000826   |
| <i>ZBTB42</i>   | 13 | 0.0000427   |
| <i>MAF1</i>     | 4  | 0.000241089 |
| <i>FCER1A</i>   | 23 | 0.0000685   |
| <i>PCED1B</i>   | 2  | 0.000146825 |
| <i>MYADM</i>    | 1  | 0.0000237   |
| <i>NKPD1</i>    | 7  | 0.00011856  |
| <i>GIPC3</i>    | 7  | 0.000166631 |
| <i>ABCA13</i>   | 10 | 0.00023009  |
| <i>TIGD5</i>    | 3  | 0.000111917 |
| <i>PDXDC1</i>   | 2  | 0.00033578  |
| <i>C1orf194</i> | 7  | 0.0000271   |
| <i>ZNF154</i>   | 2  | 0.0000238   |
| <i>R3HDM2</i>   | 2  | 0.000234898 |
| <i>SEPHS2</i>   | 0  | 0.0000677   |
| <i>GPBAR1</i>   | 1  | 0.0000574   |
| <i>ZNF784</i>   | 0  | 0.0000789   |
| <i>ZNF648</i>   | 7  | 0.000297104 |
| <i>CCR8</i>     | 3  | 0.0000321   |
| <i>FIZ1</i>     | 7  | 0.00006     |
| <i>PUF60</i>    | 3  | 0.000283398 |
| <i>TSHZ1</i>    | 2  | 0.000275733 |

|                   |    |             |
|-------------------|----|-------------|
| <i>ZNF48</i>      | 3  | 0.00014593  |
| <i>TMEM86B</i>    | 1  | 0.0000549   |
| <i>OR3A1</i>      | 40 | 0.000154847 |
| <i>MED14</i>      | 2  | 0.000299635 |
| <i>FAHD1</i>      | 4  | 0.000118313 |
| <i>TDRP</i>       | 4  | 0.0000517   |
| <i>RRH</i>        | 3  | 0.000028    |
| <i>FGD6</i>       | 2  | 0.0000626   |
| <i>PLD5</i>       | 7  | 0.000276995 |
| <i>OAZ2</i>       | 1  | 0.000213497 |
| <i>PNPLA1</i>     | 1  | 0.0000246   |
| <i>FZD2</i>       | 1  | 0.000027    |
| <i>TIGD2</i>      | 3  | 0.0000996   |
| <i>HCLS1</i>      | 0  | 0.000234463 |
| <i>ZNF609</i>     | 2  | 0.000256048 |
| <i>PAK2</i>       | 0  | 0.000197309 |
| <i>HARBI1</i>     | 0  | 0.000275527 |
| <i>GAS1</i>       | 7  | 0.000106777 |
| <i>AC004151.1</i> | 1  | 0.000199189 |
| <i>KCNE1</i>      | 0  | 0.0000826   |
| <i>ZSCAN4</i>     | 7  | 0.000116025 |
| <i>H2BC4</i>      | 3  | 0.0000541   |
| <i>PRF1</i>       | 3  | 0.0000823   |
| <i>YOD1</i>       | 4  | 0.0000659   |
| <i>TMEM64</i>     | 3  | 0.000162084 |
| <i>CHRM4</i>      | 7  | 0.0000747   |
| <i>S1PR5</i>      | 3  | 0.000105943 |
| <i>CLRN3</i>      | 7  | 0.000192491 |
| <i>GPR157</i>     | 1  | 0.0000247   |
| <i>SLC36A4</i>    | 3  | 0.000184986 |
| <i>PPA1</i>       | 3  | 0.0000977   |
| <i>CXCR2</i>      | 1  | 0.00005     |
| <i>SSR4</i>       | 3  | 0.000115179 |

|                 |   |             |
|-----------------|---|-------------|
| <i>CAPS2</i>    | 3 | 0.000110185 |
| <i>SCRIB</i>    | 1 | 0.000162828 |
| <i>KCTD2</i>    | 1 | 0.000315003 |
| <i>ST20</i>     | 0 | 0.000127149 |
| <i>PITPNB</i>   | 2 | 0.000252321 |
| <i>TCEAL8</i>   | 3 | 0.000143369 |
| <i>LRRC57</i>   | 0 | 0.000305551 |
| <i>GPR137C</i>  | 7 | 0.000249003 |
| <i>OR52N5</i>   | 7 | 0.0000242   |
| <i>LSMEM1</i>   | 0 | 0.0000795   |
| <i>FKRP</i>     | 1 | 0.000166605 |
| <i>TRAPPC5</i>  | 0 | 0.000120495 |
| <i>RPH3AL</i>   | 7 | 0.0000699   |
| <i>FCRL6</i>    | 3 | 0.000123248 |
| <i>EHMT1</i>    | 2 | 0.000279521 |
| <i>F2R</i>      | 3 | 0.0000622   |
| <i>ZNF746</i>   | 1 | 0.000210599 |
| <i>SLC25A41</i> | 7 | 0.00023367  |
| <i>TLCD5</i>    | 7 | 0.00021265  |
| <i>FRAT2</i>    | 0 | 0.000118041 |
| <i>TMEM102</i>  | 3 | 0.000175768 |
| <i>ZNF322</i>   | 3 | 0.000171386 |
| <i>NME9</i>     | 7 | 0.000325104 |
| <i>DDX60L</i>   | 5 | 0.000120996 |
| <i>SYNE4</i>    | 7 | 0.0000551   |
| <i>AATK</i>     | 1 | 0.000100096 |
| <i>ZNF467</i>   | 1 | 0.000156676 |
| <i>TMEM45A</i>  | 7 | 0.000230108 |
| <i>RAP2B</i>    | 3 | 0.000311642 |
| <i>ZBTB2</i>    | 3 | 0.000197692 |
| <i>RNF135</i>   | 0 | 0.000250802 |
| <i>ACBD4</i>    | 1 | 0.00013944  |
| <i>SGSH</i>     | 1 | 0.000140254 |

|                |   |             |
|----------------|---|-------------|
| <i>TMIE</i>    | 7 | 0.0000302   |
| <i>MEX3D</i>   | 3 | 0.0000271   |
| <i>GPR135</i>  | 2 | 0.0000244   |
| <i>P2RY13</i>  | 0 | 0.0000324   |
| <i>PHLDA2</i>  | 7 | 0.000154587 |
| <i>ATG9B</i>   | 7 | 0.0000813   |
| <i>GPR88</i>   | 7 | 0.00022689  |
| <i>ZNF875</i>  | 2 | 0.000245017 |
| <i>PLAG1</i>   | 3 | 0.0000727   |
| <i>ZBTB20</i>  | 2 | 0.000290189 |
| <i>OR2Z1</i>   | 7 | 0.000207236 |
| <i>C5orf30</i> | 0 | 0.0000968   |
| <i>AMIGO1</i>  | 2 | 0.000132044 |
| <i>SIAH2</i>   | 4 | 0.000126422 |
| <i>COPG1</i>   | 0 | 0.000310279 |
| <i>LSM10</i>   | 0 | 0.0000865   |
| <i>RELL1</i>   | 0 | 0.0000845   |
| <i>SLC35C1</i> | 1 | 0.000179693 |
| <i>TIGIT</i>   | 3 | 0.0000359   |
| <i>SLC2A4</i>  | 7 | 0.000152359 |
| <i>IBA57</i>   | 4 | 0.0000317   |
| <i>OR52K2</i>  | 1 | 0.0000258   |
| <i>CCDC149</i> | 1 | 0.0000507   |
| <i>CHST15</i>  | 1 | 0.000192423 |
| <i>IDH2</i>    | 3 | 0.000123183 |
| <i>GET1</i>    | 0 | 0.0000323   |
| <i>TNRC18</i>  | 1 | 0.000119401 |
| <i>FAM181B</i> | 7 | 0.000264652 |
| <i>NOP10</i>   | 0 | 0.00010285  |
| <i>FAM89A</i>  | 3 | 0.0000239   |
| <i>TDRKH</i>   | 2 | 0.000199505 |
| <i>TSEN54</i>  | 2 | 0.000119601 |
| <i>RAD51B</i>  | 2 | 0.000273759 |

|                |    |             |
|----------------|----|-------------|
| <i>ARL6IP4</i> | 3  | 0.0000607   |
| <i>EXT1</i>    | 0  | 0.000135491 |
| <i>SHMT2</i>   | 3  | 0.000178752 |
| <i>ATP6AP2</i> | 0  | 0.000267129 |
| <i>ZAR1</i>    | 7  | 0.000247415 |
| <i>CYB5D1</i>  | 3  | 0.0000577   |
| <i>BACE2</i>   | 9  | 0.000154847 |
| <i>UBE2E2</i>  | 2  | 0.000128386 |
| <i>AP1S2</i>   | 3  | 0.000116431 |
| <i>C8orf33</i> | 3  | 0.000431782 |
| <i>DCAF4L1</i> | 0  | 0.0000235   |
| <i>ZSCAN22</i> | 2  | 0.000233186 |
| <i>FBXL6</i>   | 1  | 0.0000672   |
| <i>GLTPD2</i>  | 7  | 0.0000834   |
| <i>YBEY</i>    | 3  | 0.000025    |
| <i>CLN8</i>    | 2  | 0.000228346 |
| <i>TSHZ2</i>   | 2  | 0.0000328   |
| <i>KPNA2</i>   | 2  | 0.0000235   |
| <i>CEP97</i>   | 3  | 0.000253149 |
| <i>FES</i>     | 0  | 0.000109022 |
| <i>GLRX5</i>   | 4  | 0.000194278 |
| <i>FAM104B</i> | 4  | 0.0000789   |
| <i>LIMK2</i>   | 1  | 0.000127922 |
| <i>MFSD5</i>   | 0  | 0.000212265 |
| <i>SPNS3</i>   | 13 | 0.000198973 |
| <i>SATB1</i>   | 3  | 0.000230095 |
| <i>ACTL10</i>  | 3  | 0.0000703   |
| <i>EPGN</i>    | 7  | 0.0000287   |
| <i>TRAK1</i>   | 2  | 0.000238609 |
| <i>TSPAN10</i> | 7  | 0.00024319  |
| <i>PLCB1</i>   | 0  | 0.0000522   |
| <i>NDN</i>     | 7  | 0.0000273   |
| <i>TTC3</i>    | 3  | 0.000305724 |

|                 |    |             |
|-----------------|----|-------------|
| <i>ANXA2</i>    | 0  | 0.000160596 |
| <i>SLC35D3</i>  | 7  | 0.0000542   |
| <i>MAFA</i>     | 7  | 0.0000884   |
| <i>GRID1</i>    | 7  | 0.000310656 |
| <i>RPS17</i>    | 3  | 0.00034927  |
| <i>HCAR2</i>    | 0  | 0.0000551   |
| <i>MAGEB17</i>  | 7  | 0.0000937   |
| <i>DDX28</i>    | 3  | 0.000333249 |
| <i>C16orf72</i> | 0  | 0.000321733 |
| <i>RBM10</i>    | 0  | 0.000281064 |
| <i>ADGRG3</i>   | 1  | 0.0000899   |
| <i>C11orf54</i> | 0  | 0.000289599 |
| <i>CEP63</i>    | 0  | 0.000226471 |
| <i>ODF3L1</i>   | 7  | 0.000182568 |
| <i>SPATA13</i>  | 0  | 0.000291942 |
| <i>ZNF662</i>   | 2  | 0.0000638   |
| <i>ZNF320</i>   | 2  | 0.0000774   |
| <i>PYCR1</i>    | 7  | 0.0000695   |
| <i>ABAT</i>     | 1  | 0.0000771   |
| <i>SLC25A10</i> | 7  | 0.0000257   |
| <i>LYSMD4</i>   | 3  | 0.000230461 |
| <i>WBP2NL</i>   | 2  | 0.0000563   |
| <i>AFMID</i>    | 0  | 0.0000251   |
| <i>FREM3</i>    | 7  | 0.000244157 |
| <i>BEGAIN</i>   | 7  | 0.0000337   |
| <i>ARHGEF37</i> | 4  | 0.0000265   |
| <i>CSMD1</i>    | 7  | 0.0000309   |
| <i>PTGDR2</i>   | 13 | 0.000211002 |
| <i>GJD3</i>     | 7  | 0.000170994 |
| <i>FANCF</i>    | 3  | 0.000233851 |
| <i>CTNNA3</i>   | 7  | 0.000194665 |
| <i>DDX41</i>    | 3  | 0.000281164 |
| <i>ABHD16B</i>  | 7  | 0.000162356 |

|         |   |             |
|---------|---|-------------|
| OR52E8  | 7 | 0.0000349   |
| DAZAP2  | 0 | 0.000158118 |
| SPDYE4  | 7 | 0.0000483   |
| CCDC125 | 0 | 0.00018951  |
| BCOR    | 2 | 0.000254015 |
| GBP6    | 5 | 0.0000584   |
| OR56A4  | 7 | 0.000255783 |
| TMEM89  | 7 | 0.0000428   |
| CCDC159 | 1 | 0.000177379 |
| RIPK4   | 7 | 0.0000783   |
| NPIPA1  | 2 | 0.0000303   |
| GTF2H2C | 0 | 0.000183385 |
| TREX2   | 1 | 0.0000412   |
| MX2     | 1 | 0.0000787   |
| TENT5C  | 4 | 0.000141718 |
| KLRC4   | 3 | 0.0000375   |
| TANGO2  | 4 | 0.000238531 |
| SFXN4   | 3 | 0.0000942   |
| GKN2    | 7 | 0.000184    |
| MRPL54  | 3 | 0.000139409 |
| ZNF438  | 0 | 0.000105567 |
| KLHL25  | 1 | 0.000132848 |
| TRMT12  | 3 | 0.000147334 |
| GPR1    | 7 | 0.000109876 |
| ALYREF  | 3 | 0.000102662 |
| RFLNB   | 1 | 0.0000405   |
| EFHC2   | 0 | 0.0000287   |
| NOG     | 3 | 0.0000244   |
| MRGPRX2 | 7 | 0.000135531 |
| UPP1    | 2 | 0.000104695 |
| LHFPL6  | 7 | 0.000253654 |
| CMTM4   | 0 | 0.00013737  |
| TMEM50A | 0 | 0.000227154 |

|                   |    |             |
|-------------------|----|-------------|
| <i>NPBWR1</i>     | 7  | 0.000243528 |
| <i>ASCL2</i>      | 3  | 0.0000279   |
| <i>KREMEN1</i>    | 1  | 0.0000295   |
| <i>TRAIP</i>      | 2  | 0.0000287   |
| <i>CHEK2</i>      | 3  | 0.000131249 |
| <i>ZNF703</i>     | 1  | 0.000035    |
| <i>CCR4</i>       | 3  | 0.000052    |
| <i>NUDT14</i>     | 3  | 0.0000309   |
| <i>MAATS1</i>     | 7  | 0.000281743 |
| <i>GPR39</i>      | 7  | 0.000277358 |
| <i>UTY</i>        | 12 | 0.000185105 |
| <i>SH2D1A</i>     | 3  | 0.000149603 |
| <i>PRKX</i>       | 3  | 0.0000712   |
| <i>KMT5A</i>      | 1  | 0.000192038 |
| <i>KCNH8</i>      | 11 | 0.0000639   |
| <i>NPW</i>        | 7  | 0.0000538   |
| <i>NPB</i>        | 7  | 0.0000401   |
| <i>ST6GALNAC3</i> | 0  | 0.0000824   |
| <i>ACTG1</i>      | 0  | 0.000149051 |
| <i>VPS33B</i>     | 2  | 0.000207844 |
| <i>TBX1</i>       | 7  | 0.000271702 |
| <i>ADAP2</i>      | 1  | 0.0000594   |
| <i>FAM120C</i>    | 2  | 0.000304213 |
| <i>EIF3C</i>      | 2  | 0.0000235   |
| <i>CLDN5</i>      | 4  | 0.0000317   |
| <i>NR2C2AP</i>    | 3  | 0.000246846 |
| <i>C1QTNF12</i>   | 7  | 0.0000951   |
| <i>SCFD2</i>      | 2  | 0.000326857 |
| <i>GPR173</i>     | 7  | 0.000203193 |
| <i>TSPYL2</i>     | 2  | 0.000201654 |
| <i>SNRNP35</i>    | 0  | 0.000380669 |
| <i>IRAK1</i>      | 1  | 0.00024415  |
| <i>CMSS1</i>      | 2  | 0.000228073 |

|                |    |             |
|----------------|----|-------------|
| <i>PCDH9</i>   | 11 | 0.0000285   |
| <i>OAF</i>     | 1  | 0.0000353   |
| <i>H2AC21</i>  | 3  | 0.0000575   |
| <i>POU6F1</i>  | 2  | 0.000124796 |
| <i>PRKD1</i>   | 7  | 0.000194842 |
| <i>CCSER1</i>  | 11 | 0.0000404   |
| <i>ZDHHC23</i> | 3  | 0.000144739 |
| <i>MRGPRE</i>  | 7  | 0.000143558 |
| <i>H1-5</i>    | 14 | 0.000217287 |
| <i>PKP3</i>    | 7  | 0.000221942 |
| <i>MAP7D2</i>  | 19 | 0.000154847 |
| <i>CSF1</i>    | 13 | 0.000042    |
| <i>ACTRT3</i>  | 7  | 0.000247508 |
| <i>MAML2</i>   | 2  | 0.000214557 |
| <i>WDR27</i>   | 2  | 0.000198929 |
| <i>TXNRD2</i>  | 4  | 0.0000605   |
| <i>FOXO4</i>   | 4  | 0.000143892 |
| <i>PTP4A3</i>  | 1  | 0.000025    |
| <i>PROS1</i>   | 4  | 0.0000712   |
| <i>CEND1</i>   | 7  | 0.000193527 |
| <i>C6orf58</i> | 7  | 0.00015221  |
| <i>SOCS3</i>   | 0  | 0.0000242   |
| <i>STING1</i>  | 1  | 0.000237846 |
| <i>SNN</i>     | 0  | 0.000131455 |
| <i>NELL2</i>   | 3  | 0.0000671   |
| <i>KRBA2</i>   | 3  | 0.000211075 |
| <i>MED12</i>   | 1  | 0.000170973 |
| <i>ZNF93</i>   | 0  | 0.0000841   |
| <i>CDCA2</i>   | 14 | 0.000196602 |
| <i>AMER1</i>   | 2  | 0.000249632 |
| <i>ZBTB40</i>  | 2  | 0.00033047  |
| <i>SERINC4</i> | 7  | 0.000141082 |
| <i>RNLS</i>    | 3  | 0.00013953  |

|                |    |             |
|----------------|----|-------------|
| <i>APOBR</i>   | 1  | 0.000130833 |
| <i>SMIM10</i>  | 7  | 0.0000243   |
| <i>OSBP2</i>   | 4  | 0.000113972 |
| <i>TRARG1</i>  | 7  | 0.000254945 |
| <i>TMED9</i>   | 3  | 0.00031437  |
| <i>TMEM186</i> | 3  | 0.000335072 |
| <i>SDR42E1</i> | 2  | 0.000158888 |
| <i>BTBD6</i>   | 3  | 0.000130759 |
| <i>IMMP2L</i>  | 2  | 0.000169725 |
| <i>TCEAL2</i>  | 7  | 0.0000349   |
| <i>NUTM2A</i>  | 7  | 0.0000349   |
| <i>LCN12</i>   | 7  | 0.0000468   |
| <i>OR6A2</i>   | 7  | 0.000217427 |
| <i>USP18</i>   | 5  | 0.000162813 |
| <i>SORCS2</i>  | 7  | 0.000275897 |
| <i>DGAT1</i>   | 1  | 0.00015998  |
| <i>CA13</i>    | 2  | 0.000118389 |
| <i>SPDYE16</i> | 7  | 0.0000891   |
| <i>CIB1</i>    | 3  | 0.000155279 |
| <i>SLC24A3</i> | 7  | 0.0000512   |
| <i>EFCAB10</i> | 7  | 0.000138267 |
| <i>C5orf47</i> | 7  | 0.000140213 |
| <i>ADSS1</i>   | 7  | 0.000206694 |
| <i>ANO9</i>    | 2  | 0.0000832   |
| <i>H2BC13</i>  | 14 | 0.000202864 |
| <i>MIXL1</i>   | 7  | 0.000248351 |
| <i>MFSD6L</i>  | 13 | 0.0000779   |
| <i>LRRC37B</i> | 2  | 0.000267644 |
| <i>DDX51</i>   | 1  | 0.000171741 |
| <i>NOMO2</i>   | 2  | 0.000118469 |
| <i>TNFAIP2</i> | 1  | 0.000175869 |
| <i>ZNF445</i>  | 1  | 0.000219015 |
| <i>RAB11B</i>  | 1  | 0.0000908   |

|                  |    |             |
|------------------|----|-------------|
| <i>GP1BA</i>     | 4  | 0.0000936   |
| <i>PPIL6</i>     | 7  | 0.00029229  |
| <i>KIAA0825</i>  | 0  | 0.0000933   |
| <i>UBALD2</i>    | 1  | 0.0000426   |
| <i>KLHL33</i>    | 7  | 0.000153689 |
| <i>RBM11</i>     | 3  | 0.000027    |
| <i>SOCS1</i>     | 5  | 0.0000538   |
| <i>PRKN</i>      | 2  | 0.000114179 |
| <i>TEDC1</i>     | 1  | 0.00010392  |
| <i>TNFAIP8L1</i> | 2  | 0.000132364 |
| <i>TARS3</i>     | 3  | 0.000326302 |
| <i>SMYD3</i>     | 2  | 0.000190858 |
| <i>METTL7A</i>   | 3  | 0.000086    |
| <i>IFNLR1</i>    | 11 | 0.0000325   |
| <i>FAM174B</i>   | 0  | 0.0000283   |
| <i>STAC3</i>     | 0  | 0.0000718   |
| <i>ROR1</i>      | 11 | 0.000197675 |
| <i>MUC1</i>      | 7  | 0.000178229 |
| <i>IRF7</i>      | 5  | 0.000118138 |
| <i>PCGF3</i>     | 2  | 0.000091    |
| <i>LMLN</i>      | 2  | 0.00003     |
| <i>P4HB</i>      | 0  | 0.00027795  |
| <i>NDUFA4L2</i>  | 7  | 0.000280644 |
| <i>ZFP36L1</i>   | 0  | 0.0000461   |
| <i>UBE2L3</i>    | 3  | 0.000220965 |
| <i>PMEL</i>      | 7  | 0.000261266 |
| <i>SYN3</i>      | 7  | 0.000174594 |
| <i>SNAI3</i>     | 1  | 0.0000817   |
| <i>ZBTB3</i>     | 2  | 0.000163455 |
| <i>MYBL1</i>     | 3  | 0.000078    |
| <i>IFIT1</i>     | 5  | 0.000131994 |
| <i>CLDN24</i>    | 39 | 0.000154847 |
| <i>KCNQ5</i>     | 2  | 0.000037    |

|                 |    |             |
|-----------------|----|-------------|
| <i>ADAMTSL5</i> | 7  | 0.000109298 |
| <i>ARL17A</i>   | 41 | 0.000154847 |
| <i>IFITM1</i>   | 5  | 0.0000463   |
| <i>LAMP1</i>    | 0  | 0.000101148 |
| <i>TAS2R60</i>  | 42 | 0.000154847 |
| <i>C16orf54</i> | 1  | 0.000153006 |
| <i>SETD4</i>    | 2  | 0.000357718 |
| <i>PTCH1</i>    | 2  | 0.00010646  |
| <i>RTN4RL1</i>  | 7  | 0.000289023 |
| <i>CALHM1</i>   | 7  | 0.000261964 |
| <i>ZNF267</i>   | 0  | 0.000142569 |
| <i>IRS2</i>     | 1  | 0.0000449   |
| <i>C7orf61</i>  | 1  | 0.0000247   |
| <i>BICD2</i>    | 0  | 0.000333003 |
| <i>TMLHE</i>    | 0  | 0.000328508 |
| <i>SLITRK2</i>  | 7  | 0.000215216 |
| <i>RASA3</i>    | 2  | 0.000230558 |
| <i>ZNF529</i>   | 3  | 0.000296895 |
| <i>KRT73</i>    | 36 | 0.000154847 |
| <i>AIDA</i>     | 3  | 0.000115663 |
| <i>C15orf41</i> | 3  | 0.00025696  |
| <i>ZPBP2</i>    | 7  | 0.0000813   |
| <i>KRT5</i>     | 7  | 0.0000259   |
| <i>NBPF6</i>    | 7  | 0.0000478   |
| <i>LRRC70</i>   | 3  | 0.0000359   |
| <i>PIP5K1C</i>  | 1  | 0.000165224 |
| <i>CYP4F2</i>   | 7  | 0.0000294   |
| <i>POLR3C</i>   | 2  | 0.000380915 |
| <i>WWOX</i>     | 2  | 0.000232811 |
| <i>POLR1D</i>   | 4  | 0.000143381 |
| <i>1-Mar</i>    | 0  | 0.0000467   |
| <i>ZNF749</i>   | 3  | 0.0000893   |
| <i>KLHL32</i>   | 3  | 0.0000706   |

|                 |    |             |
|-----------------|----|-------------|
| <i>MRTFB</i>    | 2  | 0.0002528   |
| <i>BTLA</i>     | 3  | 0.000109769 |
| <i>TOR3A</i>    | 3  | 0.000218928 |
| <i>NAP1L3</i>   | 3  | 0.0000414   |
| <i>RXRA</i>     | 1  | 0.000215709 |
| <i>NUDT17</i>   | 2  | 0.0000497   |
| <i>KRT10</i>    | 3  | 0.0000447   |
| <i>CD300E</i>   | 1  | 0.000045    |
| <i>CCDC30</i>   | 2  | 0.000119137 |
| <i>NKRF</i>     | 3  | 0.000287326 |
| <i>FCAR</i>     | 0  | 0.0000524   |
| <i>SPATA12</i>  | 7  | 0.000240689 |
| <i>RPS23</i>    | 3  | 0.0000719   |
| <i>GNG2</i>     | 0  | 0.0001935   |
| <i>BTN3A2</i>   | 2  | 0.0000357   |
| <i>AKAP14</i>   | 7  | 0.0000626   |
| <i>ZNF396</i>   | 0  | 0.0000314   |
| <i>ARHGAP30</i> | 0  | 0.000266549 |
| <i>SEPTIN10</i> | 43 | 0.000154847 |
| <i>FAM86B1</i>  | 7  | 0.0000249   |
| <i>CYP4F3</i>   | 0  | 0.0000689   |
| <i>FOXD2</i>    | 7  | 0.000220713 |
| <i>SMIM29</i>   | 0  | 0.00012142  |
| <i>SPATC1</i>   | 7  | 0.0000847   |
| <i>UBE2H</i>    | 4  | 0.000211833 |
| <i>HPDL</i>     | 7  | 0.000035    |
| <i>CARMIL3</i>  | 7  | 0.0000236   |
| <i>PRG2</i>     | 7  | 0.000204244 |
| <i>PRR5</i>     | 1  | 0.0000463   |
| <i>CCDC73</i>   | 7  | 0.0000492   |
| <i>ZNF732</i>   | 7  | 0.000182275 |
| <i>SPIN2B</i>   | 3  | 0.000235292 |
| <i>TPCN1</i>    | 1  | 0.000146532 |

|                |    |             |
|----------------|----|-------------|
| <i>LCE1A</i>   | 7  | 0.0000319   |
| <i>TRABD2A</i> | 3  | 0.00011174  |
| <i>TMEM17</i>  | 7  | 0.000152244 |
| <i>TMEM232</i> | 7  | 0.0000292   |
| <i>FAM183A</i> | 7  | 0.000147005 |
| <i>GPR141</i>  | 0  | 0.0000495   |
| <i>TMPRSS6</i> | 7  | 0.000290324 |
| <i>TMEM216</i> | 0  | 0.00017112  |
| <i>C3orf70</i> | 7  | 0.000297126 |
| <i>OR2AK2</i>  | 44 | 0.000144969 |
| <i>ENTPD5</i>  | 4  | 0.0000785   |
| <i>MITF</i>    | 2  | 0.0000312   |
| <i>LILRA5</i>  | 0  | 0.0000236   |
| <i>SLIT1</i>   | 7  | 0.000127438 |
| <i>VSTM2B</i>  | 7  | 0.0000509   |
| <i>SHTN1</i>   | 0  | 0.0000239   |
| <i>H1-7</i>    | 7  | 0.000228917 |
| <i>MT1X</i>    | 3  | 0.0000371   |
| <i>GCNT1</i>   | 3  | 0.000102797 |
| <i>SESTD1</i>  | 0  | 0.0000494   |
| <i>RSBN1L</i>  | 0  | 0.000312145 |
| <i>EPOR</i>    | 1  | 0.0000387   |
| <i>CHP1</i>    | 1  | 0.000117939 |
| <i>H1-6</i>    | 0  | 0.0000413   |
| <i>CDHR4</i>   | 7  | 0.000271443 |
| <i>IFT140</i>  | 2  | 0.000323031 |
| <i>TLR5</i>    | 0  | 0.0000276   |
| <i>COX8C</i>   | 7  | 0.000241804 |
| <i>PLEKHN1</i> | 7  | 0.000264191 |
| <i>ISG15</i>   | 5  | 0.000189826 |
| <i>PERM1</i>   | 7  | 0.000266948 |
| <i>EZH1P</i>   | 7  | 0.0000236   |
| <i>SLC18A3</i> | 7  | 0.000126206 |

|                 |    |             |
|-----------------|----|-------------|
| <i>NHEJ1</i>    | 2  | 0.000110365 |
| <i>FANCA</i>    | 1  | 0.0000393   |
| <i>SEMA4D</i>   | 1  | 0.000212774 |
| <i>ZNF70</i>    | 2  | 0.000168492 |
| <i>CARD9</i>    | 1  | 0.0000682   |
| <i>PEAR1</i>    | 7  | 0.000140579 |
| <i>ZFP69B</i>   | 2  | 0.000177919 |
| <i>SOWAHD</i>   | 0  | 0.0000758   |
| <i>ZFP69</i>    | 3  | 0.000280568 |
| <i>TMEM220</i>  | 2  | 0.0000236   |
| <i>H1-2</i>     | 3  | 0.0000651   |
| <i>ASCL4</i>    | 7  | 0.000209652 |
| <i>CCDC157</i>  | 1  | 0.000111867 |
| <i>FAM122A</i>  | 3  | 0.000352757 |
| <i>SHISA7</i>   | 7  | 0.0000868   |
| <i>LRRC74B</i>  | 7  | 0.000302275 |
| <i>CLEC17A</i>  | 11 | 0.000178656 |
| <i>OVCH1</i>    | 7  | 0.000245314 |
| <i>CYHR1</i>    | 1  | 0.000240614 |
| <i>CPSF4L</i>   | 7  | 0.000246612 |
| <i>PLA2G2C</i>  | 7  | 0.000027    |
| <i>TPRG1</i>    | 3  | 0.0000536   |
| <i>UBQLN2</i>   | 2  | 0.000159743 |
| <i>C19orf67</i> | 7  | 0.000184722 |
| <i>CLCN1</i>    | 7  | 0.000226887 |
| <i>C11orf95</i> | 2  | 0.000118429 |
| <i>GPR89B</i>   | 3  | 0.000296826 |
| <i>MAPK12</i>   | 7  | 0.00027317  |
| <i>AGRN</i>     | 5  | 0.000114064 |
| <i>NHS</i>      | 0  | 0.0000523   |
| <i>ZNF626</i>   | 3  | 0.0000563   |
| <i>HEPACAM2</i> | 4  | 0.000051    |
| <i>LAMTOR4</i>  | 0  | 0.000134708 |

|                 |    |             |
|-----------------|----|-------------|
| <i>NCR3LG1</i>  | 2  | 0.0000291   |
| <i>DCUN1D3</i>  | 2  | 0.000250978 |
| <i>ZNF793</i>   | 3  | 0.0000659   |
| <i>AGAP4</i>    | 2  | 0.000235955 |
| <i>COMMD6</i>   | 3  | 0.000051    |
| <i>HYKK</i>     | 7  | 0.0000262   |
| <i>HES4</i>     | 5  | 0.0000646   |
| <i>ZNF669</i>   | 3  | 0.000183597 |
| <i>PEAK3</i>    | 1  | 0.0000653   |
| <i>LRR1Q4</i>   | 7  | 0.000228164 |
| <i>PLSCR1</i>   | 5  | 0.000127028 |
| <i>C3orf62</i>  | 1  | 0.000221936 |
| <i>ZNF559</i>   | 3  | 0.000182075 |
| <i>SBK1</i>     | 1  | 0.0000624   |
| <i>OR6N2</i>    | 45 | 0.000154847 |
| <i>FOCAD</i>    | 2  | 0.000168827 |
| <i>PRR19</i>    | 7  | 0.000217474 |
| <i>JAKMIP3</i>  | 7  | 0.000323927 |
| <i>SELL</i>     | 0  | 0.000124108 |
| <i>IER5L</i>    | 0  | 0.0000237   |
| <i>C19orf54</i> | 1  | 0.0000634   |
| <i>FAM83G</i>   | 1  | 0.0000432   |
| <i>HBA2</i>     | 46 | 0.000154847 |
| <i>CCDC9B</i>   | 1  | 0.0000491   |
| <i>NBR1</i>     | 0  | 0.000335251 |
| <i>OR2G6</i>    | 7  | 0.0000871   |
| <i>FBLL1</i>    | 7  | 0.0000242   |
| <i>NKAIN2</i>   | 7  | 0.000250563 |
| <i>CLEC20A</i>  | 7  | 0.000263456 |
| <i>CLN3</i>     | 1  | 0.000201219 |
| <i>ASAH2</i>    | 7  | 0.0000573   |
| <i>RTL6</i>     | 2  | 0.000120933 |
| <i>DPYD</i>     | 0  | 0.000258914 |

|                   |    |             |
|-------------------|----|-------------|
| <i>CC2D2B</i>     | 0  | 0.0000236   |
| <i>RHCE</i>       | 4  | 0.00005     |
| <i>IDO2</i>       | 7  | 0.0000367   |
| <i>PARVB</i>      | 1  | 0.0000604   |
| <i>SLC4A5</i>     | 2  | 0.0000997   |
| <i>ZDHH9</i>      | 2  | 0.0000294   |
| <i>ZBED6CL</i>    | 2  | 0.000146947 |
| <i>QRFP</i>       | 7  | 0.0000851   |
| <i>TMEM120B</i>   | 1  | 0.000181325 |
| <i>NOXA1</i>      | 1  | 0.0000341   |
| <i>TMEM198</i>    | 7  | 0.000305677 |
| <i>BCL2L15</i>    | 28 | 0.000154847 |
| <i>ZNF548</i>     | 3  | 0.00030699  |
| <i>BEND4</i>      | 11 | 0.000178254 |
| <i>MSL1</i>       | 0  | 0.000282821 |
| <i>AC099489.1</i> | 1  | 0.0000645   |
| <i>LRRK2</i>      | 0  | 0.000153105 |
| <i>INSYN2A</i>    | 7  | 0.000176698 |
| <i>NYX</i>        | 7  | 0.0000531   |
| <i>NELFB</i>      | 3  | 0.000202735 |
| <i>HUS1B</i>      | 2  | 0.0000817   |
| <i>ADAT2</i>      | 3  | 0.000287211 |
| <i>RNF222</i>     | 7  | 0.000271056 |
| <i>RELN</i>       | 7  | 0.000293981 |
| <i>LITAF</i>      | 0  | 0.00011177  |
| <i>TMEM120A</i>   | 0  | 0.000182882 |
| <i>FAM25G</i>     | 7  | 0.0000352   |
| <i>NKAPL</i>      | 0  | 0.0000236   |
| <i>FSCB</i>       | 7  | 0.000189752 |
| <i>JPT1</i>       | 0  | 0.000180708 |
| <i>ZAR1L</i>      | 7  | 0.000204835 |
| <i>ZNF33A</i>     | 0  | 0.000276181 |
| <i>PCDH18</i>     | 7  | 0.0000446   |

|                   |    |             |
|-------------------|----|-------------|
| <i>ZNF600</i>     | 3  | 0.0000432   |
| <i>TSPYL1</i>     | 3  | 0.000274626 |
| <i>FHIT</i>       | 2  | 0.0000363   |
| <i>RRP7A</i>      | 3  | 0.0000282   |
| <i>SPANXN4</i>    | 7  | 0.0000261   |
| <i>SLC35E2B</i>   | 1  | 0.000134563 |
| <i>TOGARAM2</i>   | 3  | 0.0000647   |
| <i>NEMP2</i>      | 3  | 0.000213444 |
| <i>ALG1L</i>      | 7  | 0.000044    |
| <i>GSPT2</i>      | 3  | 0.000160922 |
| <i>C8orf76</i>    | 2  | 0.000364758 |
| <i>ZFP92</i>      | 1  | 0.0000289   |
| <i>NCR1</i>       | 3  | 0.000116096 |
| <i>SYCP2</i>      | 0  | 0.0000507   |
| <i>IL1RAP</i>     | 0  | 0.0000897   |
| <i>PAX5</i>       | 11 | 0.000126549 |
| <i>SPOCK3</i>     | 7  | 0.000156526 |
| <i>TDRD7</i>      | 0  | 0.000128245 |
| <i>CCDC189</i>    | 0  | 0.0000375   |
| <i>HLA-DRB1</i>   | 3  | 0.0000316   |
| <i>VN1R2</i>      | 7  | 0.000114409 |
| <i>AKR1C3</i>     | 3  | 0.0000555   |
| <i>SPATS2L</i>    | 5  | 0.000180517 |
| <i>ZNF250</i>     | 3  | 0.000364655 |
| <i>ZNF79</i>      | 3  | 0.000360612 |
| <i>S100A4</i>     | 0  | 0.000110564 |
| <i>AC040160.1</i> | 2  | 0.0000613   |
| <i>STK40</i>      | 1  | 0.000232033 |
| <i>SEMA4A</i>     | 1  | 0.000104774 |
| <i>SIRPB2</i>     | 1  | 0.000116623 |
| <i>SRGAP3</i>     | 7  | 0.000135774 |
| <i>SUPT5H</i>     | 1  | 0.000257808 |
| <i>XPNPEP3</i>    | 2  | 0.000242088 |

|                  |    |             |
|------------------|----|-------------|
| <i>OR2T2</i>     | 7  | 0.0000298   |
| <i>OR2C3</i>     | 7  | 0.000215017 |
| <i>ZNF107</i>    | 3  | 0.0000371   |
| <i>ZNF471</i>    | 47 | 0.000183376 |
| <i>ATP2A1</i>    | 7  | 0.000258216 |
| <i>MFSD14C</i>   | 2  | 0.000298164 |
| <i>POM121</i>    | 1  | 0.00029788  |
| <i>GIMAP5</i>    | 3  | 0.000229349 |
| <i>STK31</i>     | 7  | 0.000265303 |
| <i>NLGN3</i>     | 1  | 0.0000654   |
| <i>ZKSCAN7</i>   | 3  | 0.000111349 |
| <i>CD55</i>      | 0  | 0.0000781   |
| <i>CPNE4</i>     | 7  | 0.000197865 |
| <i>NTNG2</i>     | 1  | 0.000045    |
| <i>SRGAP2B</i>   | 0  | 0.000053    |
| <i>ZNF781</i>    | 3  | 0.0000494   |
| <i>ZNF774</i>    | 7  | 0.000190316 |
| <i>PTPN1</i>     | 2  | 0.000394873 |
| <i>EVL</i>       | 2  | 0.000258046 |
| <i>PRTN3</i>     | 7  | 0.0000236   |
| <i>ZNF765</i>    | 3  | 0.00010056  |
| <i>C20orf204</i> | 1  | 0.0000266   |
| <i>PPP1R26</i>   | 13 | 0.0000406   |
| <i>NBPF4</i>     | 7  | 0.00006     |
| <i>TSC22D2</i>   | 3  | 0.000241699 |
| <i>CRYBA4</i>    | 7  | 0.000239569 |
| <i>YRDC</i>      | 3  | 0.000172409 |
| <i>ZNF775</i>    | 3  | 0.0000502   |
| <i>RFX8</i>      | 7  | 0.000129542 |
| <i>ZNF799</i>    | 3  | 0.00029089  |
| <i>NCOR2</i>     | 1  | 0.000206059 |
| <i>ARL9</i>      | 7  | 0.000243827 |
| <i>TCEAL3</i>    | 3  | 0.0000292   |

|                 |    |             |
|-----------------|----|-------------|
| <i>SLC6A9</i>   | 4  | 0.0000409   |
| <i>BORCS6</i>   | 0  | 0.000179471 |
| <i>MAN2A2</i>   | 1  | 0.000223077 |
| <i>MME</i>      | 0  | 0.00010062  |
| <i>CACNA1H</i>  | 7  | 0.000301628 |
| <i>SULF2</i>    | 0  | 0.000105869 |
| <i>PLXNB2</i>   | 1  | 0.0000807   |
| <i>AJAP1</i>    | 7  | 0.0000714   |
| <i>XRCC2</i>    | 14 | 0.0000587   |
| <i>MYO6</i>     | 3  | 0.000071    |
| <i>TCF4</i>     | 11 | 0.000107649 |
| <i>ZKSCAN5</i>  | 3  | 0.000402133 |
| <i>TECPR2</i>   | 1  | 0.00015565  |
| <i>TLR7</i>     | 0  | 0.0000283   |
| <i>ERI2</i>     | 3  | 0.000189858 |
| <i>HSH2D</i>    | 1  | 0.000114835 |
| <i>TRPV1</i>    | 1  | 0.000142328 |
| <i>NF1</i>      | 2  | 0.000282373 |
| <i>VKORC1L1</i> | 3  | 0.000342302 |
| <i>ZNF418</i>   | 2  | 0.0000238   |
| <i>DAPK1</i>    | 1  | 0.0000291   |
| <i>H2AC13</i>   | 14 | 0.0000618   |
| <i>S100A2</i>   | 7  | 0.000222432 |
| <i>TLE1</i>     | 2  | 0.0000289   |
| <i>MAML3</i>    | 1  | 0.000192347 |
| <i>H2AC11</i>   | 3  | 0.0000682   |
| <i>ZNF239</i>   | 3  | 0.000105274 |
| <i>MVB12B</i>   | 2  | 0.0000382   |
| <i>POTEI</i>    | 7  | 0.0000992   |
| <i>ADA</i>      | 3  | 0.0000606   |
| <i>ARID5A</i>   | 1  | 0.00015244  |
| <i>ZFP28</i>    | 3  | 0.0000709   |
| <i>CBWD3</i>    | 0  | 0.00010518  |

|                 |    |             |
|-----------------|----|-------------|
| <i>LAMB3</i>    | 7  | 0.0000837   |
| <i>H2BU1</i>    | 4  | 0.0000368   |
| <i>ANKRD36B</i> | 3  | 0.0000434   |
| <i>ARHGEF12</i> | 4  | 0.00018175  |
| <i>HCAR1</i>    | 7  | 0.000195386 |
| <i>PDLIM7</i>   | 1  | 0.000142479 |
| <i>FAM3C</i>    | 3  | 0.000125404 |
| <i>CASP4</i>    | 0  | 0.00019883  |
| <i>AP2A1</i>    | 4  | 0.000151886 |
| <i>FUT11</i>    | 3  | 0.000296861 |
| <i>LAGE3</i>    | 3  | 0.00016776  |
| <i>WDR45</i>    | 4  | 0.000221435 |
| <i>ZNF470</i>   | 3  | 0.000113236 |
| <i>GMFB</i>     | 3  | 0.00014165  |
| <i>ZNF763</i>   | 0  | 0.0000442   |
| <i>DTHD1</i>    | 3  | 0.000024    |
| <i>H4C3</i>     | 3  | 0.0000582   |
| <i>ARRDC1</i>   | 1  | 0.000179415 |
| <i>KIAA1671</i> | 7  | 0.0000621   |
| <i>IGF2R</i>    | 1  | 0.00016201  |
| <i>LCE1C</i>    | 7  | 0.0000928   |
| <i>GAL3ST4</i>  | 1  | 0.0000282   |
| <i>PCBP2</i>    | 2  | 0.000189452 |
| <i>ZGPAT</i>    | 3  | 0.000164097 |
| <i>PGAP1</i>    | 3  | 0.0000462   |
| <i>SRC</i>      | 1  | 0.0000663   |
| <i>ZNF772</i>   | 3  | 0.0000604   |
| <i>LRRC8B</i>   | 3  | 0.000121861 |
| <i>H3C12</i>    | 14 | 0.000137459 |
| <i>ZNF785</i>   | 1  | 0.000174083 |
| <i>CYSRT1</i>   | 7  | 0.0000242   |
| <i>SLC22A4</i>  | 0  | 0.0000882   |
| <i>H4C11</i>    | 3  | 0.0000549   |

|                 |    |             |
|-----------------|----|-------------|
| <i>SERPINA1</i> | 1  | 0.000159172 |
| <i>KANK2</i>    | 4  | 0.0000469   |
| <i>RAD54B</i>   | 3  | 0.0000547   |
| <i>FITM2</i>    | 2  | 0.000221936 |
| <i>BLM</i>      | 3  | 0.00016483  |
| <i>LRP10</i>    | 1  | 0.000176501 |
| <i>PELI1</i>    | 0  | 0.000214992 |
| <i>MRPL21</i>   | 3  | 0.000150005 |
| <i>ZNF98</i>    | 7  | 0.000238005 |
| <i>FBXL22</i>   | 7  | 0.0000286   |
| <i>ZNF786</i>   | 3  | 0.000325308 |
| <i>ADARB1</i>   | 2  | 0.000160993 |
| <i>ZNF860</i>   | 11 | 0.000111361 |
| <i>OR6N1</i>    | 45 | 0.000154847 |
| <i>C5AR1</i>    | 1  | 0.00015699  |
| <i>VEPH1</i>    | 4  | 0.000059    |
| <i>MAP3K5</i>   | 0  | 0.000294967 |
| <i>OR2L5</i>    | 44 | 0.000190257 |
| <i>STMN3</i>    | 3  | 0.000129018 |
| <i>PDGFA</i>    | 4  | 0.00018404  |
| <i>SPN</i>      | 1  | 0.0000442   |
| <i>ZNF628</i>   | 1  | 0.000118712 |
| <i>SLC2A10</i>  | 7  | 0.000273533 |
| <i>ZNF665</i>   | 3  | 0.0000243   |
| <i>RPF2</i>     | 3  | 0.000181511 |
| <i>SLC28A3</i>  | 10 | 0.0000615   |
| <i>MYO5A</i>    | 0  | 0.000314794 |
| <i>GZMM</i>     | 3  | 0.0000471   |
| <i>ATG7</i>     | 2  | 0.000222206 |
| <i>ELANE</i>    | 10 | 0.000117454 |
| <i>RAB40C</i>   | 1  | 0.000172837 |
| <i>HOXA4</i>    | 7  | 0.000215283 |
| <i>TOPORS</i>   | 0  | 0.000125137 |

|                 |    |             |
|-----------------|----|-------------|
| <i>BCO2</i>     | 2  | 0.0000322   |
| <i>ENPP1</i>    | 7  | 0.000278133 |
| <i>CDC42SE1</i> | 0  | 0.00034114  |
| <i>MPEG1</i>    | 1  | 0.0000711   |
| <i>DPP4</i>     | 3  | 0.000104708 |
| <i>PDCD1LG2</i> | 5  | 0.0000766   |
| <i>DNAH10</i>   | 7  | 0.00036681  |
| <i>KLHL14</i>   | 11 | 0.0000875   |
| <i>CR1L</i>     | 4  | 0.000136893 |
| <i>PSAP</i>     | 1  | 0.000188034 |
| <i>S100A10</i>  | 3  | 0.0000833   |
| <i>RPL37A</i>   | 3  | 0.0000702   |
| <i>TXNRD3</i>   | 3  | 0.000112944 |
| <i>MAP1LC3C</i> | 7  | 0.000237183 |
| <i>KLHDC1</i>   | 3  | 0.000210517 |
| <i>TAF13</i>    | 3  | 0.0000937   |
| <i>CCDC180</i>  | 2  | 0.0000295   |
| <i>H4-16</i>    | 3  | 0.000149642 |
| <i>INKA2</i>    | 0  | 0.0000788   |
| <i>PRB3</i>     | 7  | 0.000139123 |
| <i>FAM49A</i>   | 0  | 0.000272761 |
| <i>H2BC12</i>   | 3  | 0.0000751   |
| <i>ZNF677</i>   | 3  | 0.0000239   |
| <i>ERO1A</i>    | 0  | 0.00014867  |
| <i>ZNF823</i>   | 3  | 0.000137421 |
| <i>PLCG2</i>    | 1  | 0.000255443 |
| <i>FCHSD1</i>   | 1  | 0.000252574 |
| <i>RPL12</i>    | 3  | 0.000102125 |
| <i>DNM3</i>     | 4  | 0.000150613 |
| <i>MPZL1</i>    | 0  | 0.0000306   |
| <i>GOLGA6L9</i> | 3  | 0.0000328   |
| <i>KEL</i>      | 4  | 0.000115391 |
| <i>FCGR1B</i>   | 5  | 0.000140785 |

|                  |    |             |
|------------------|----|-------------|
| <i>RPS4X</i>     | 3  | 0.0000514   |
| <i>ZNF667</i>    | 47 | 0.000126317 |
| <i>SIRPA</i>     | 1  | 0.000194089 |
| <i>GRK6</i>      | 1  | 0.000280216 |
| <i>SULT1C4</i>   | 7  | 0.000195249 |
| <i>ZNF248</i>    | 3  | 0.000293913 |
| <i>OR2L3</i>     | 44 | 0.000103781 |
| <i>ZNF544</i>    | 3  | 0.000265618 |
| <i>SOWAHC</i>    | 43 | 0.000154847 |
| <i>ZNF251</i>    | 2  | 0.000363293 |
| <i>TFDP1</i>     | 4  | 0.000103354 |
| <i>ZNF334</i>    | 7  | 0.000121571 |
| <i>HSD17B11</i>  | 0  | 0.000226313 |
| <i>RPS6KL1</i>   | 7  | 0.000107683 |
| <i>UBL5</i>      | 3  | 0.00010928  |
| <i>TMEM116</i>   | 3  | 0.000258665 |
| <i>PHETA1</i>    | 1  | 0.0000496   |
| <i>MYL4</i>      | 4  | 0.0000299   |
| <i>HOXC4</i>     | 7  | 0.0000924   |
| <i>PIM3</i>      | 0  | 0.0000358   |
| <i>GET3</i>      | 0  | 0.000124079 |
| <i>ASPH</i>      | 0  | 0.0000469   |
| <i>NTRK1</i>     | 7  | 0.000184303 |
| <i>MT1F</i>      | 3  | 0.0000336   |
| <i>ZNF69</i>     | 3  | 0.000140642 |
| <i>TXNRD1</i>    | 0  | 0.000244491 |
| <i>ZNF583</i>    | 3  | 0.000123687 |
| <i>ZXDB</i>      | 2  | 0.000234008 |
| <i>ZNF587</i>    | 2  | 0.000344545 |
| <i>SH3BGRL2</i>  | 4  | 0.000265131 |
| <i>ANKRD35</i>   | 7  | 0.000181091 |
| <i>C20orf203</i> | 7  | 0.000247172 |
| <i>ZNF789</i>    | 2  | 0.000356448 |

|                 |    |             |
|-----------------|----|-------------|
| <i>CTNND1</i>   | 2  | 0.000146792 |
| <i>SH2D1B</i>   | 3  | 0.000113034 |
| <i>NUDT16</i>   | 0  | 0.000204758 |
| <i>LRBA</i>     | 3  | 0.000306096 |
| <i>MMP17</i>    | 1  | 0.000041    |
| <i>BAZ1A</i>    | 0  | 0.000184108 |
| <i>CCDC69</i>   | 1  | 0.00028594  |
| <i>STK39</i>    | 2  | 0.000216562 |
| <i>C6orf89</i>  | 0  | 0.000394519 |
| <i>EIF1AY</i>   | 12 | 0.000110895 |
| <i>MT-ND6</i>   | 7  | 0.0000271   |
| <i>IPO9</i>     | 2  | 0.000354288 |
| <i>MT-CO2</i>   | 48 | 0.00023372  |
| <i>GLMP</i>     | 1  | 0.0000436   |
| <i>MT-CYB</i>   | 48 | 0.000184975 |
| <i>PPP1R14C</i> | 7  | 0.000109511 |
| <i>F5</i>       | 0  | 0.0000532   |
| <i>MSRB1</i>    | 0  | 0.000158468 |
| <i>CDC42BPB</i> | 1  | 0.0000868   |
| <i>MT-ND2</i>   | 48 | 0.000209008 |
| <i>RCSD1</i>    | 0  | 0.000314879 |
| <i>FAM169A</i>  | 3  | 0.000164576 |
| <i>GRIN3A</i>   | 7  | 0.000024    |
| <i>MT-ND5</i>   | 48 | 0.000141838 |
| <i>TMEM184B</i> | 1  | 0.000194706 |
| <i>SCAMP5</i>   | 7  | 0.0000998   |
| <i>LRIG2</i>    | 2  | 0.000299507 |
| <i>MT-CO1</i>   | 48 | 0.000172001 |
| <i>PNP</i>      | 4  | 0.0000735   |
| <i>GK</i>       | 0  | 0.0000692   |
| <i>ZNF358</i>   | 7  | 0.0000459   |
| <i>CD247</i>    | 3  | 0.000119371 |
| <i>CHAMP1</i>   | 3  | 0.000105063 |

|                  |    |             |
|------------------|----|-------------|
| <i>ARHGAP11A</i> | 14 | 0.000116129 |
| <i>HMGN2</i>     | 3  | 0.000275296 |
| <i>SELENOM</i>   | 3  | 0.000033    |
| <i>UBE2J1</i>    | 0  | 0.0000698   |
| <i>DENND4B</i>   | 1  | 0.000254999 |
| <i>MT-ND3</i>    | 48 | 0.0000452   |
| <i>CD3E</i>      | 2  | 0.0000861   |
| <i>RUSC2</i>     | 1  | 0.0000444   |
| <i>R3HDM4</i>    | 4  | 0.000115761 |
| <i>GRK5</i>      | 0  | 0.000229117 |
| <i>DCAF12</i>    | 4  | 0.000234923 |
| <i>ASB12</i>     | 7  | 0.0000323   |
| <i>ITPRIPL1</i>  | 3  | 0.00014181  |
| <i>MT-ND4</i>    | 48 | 0.000184975 |
| <i>MT-ND1</i>    | 48 | 0.000141838 |
| <i>CIPC</i>      | 0  | 0.000321067 |
| <i>CAPZA2</i>    | 0  | 0.000116728 |
| <i>MT-ATP6</i>   | 48 | 0.000209008 |
| <i>RASGEF1A</i>  | 2  | 0.0000239   |
| <i>RPL39</i>     | 3  | 0.0000426   |
| <i>DZIP3</i>     | 3  | 0.000134485 |
| <i>ATG9A</i>     | 1  | 0.000227601 |
| <i>APRT</i>      | 3  | 0.000122395 |
| <i>GPRASP1</i>   | 3  | 0.000164768 |
| <i>TBKBP1</i>    | 1  | 0.0000365   |
| <i>MAGEE1</i>    | 2  | 0.000122573 |
| <i>CCDC167</i>   | 3  | 0.0000541   |
| <i>MT-CO3</i>    | 48 | 0.000066    |
| <i>ZFP2</i>      | 3  | 0.0000656   |
| <i>L3MBTL3</i>   | 3  | 0.000279246 |
| <i>SMG5</i>      | 1  | 0.000166079 |
| <i>TGM2</i>      | 4  | 0.0000932   |
| <i>OR2L2</i>     | 44 | 0.000190257 |

|                 |    |             |
|-----------------|----|-------------|
| <i>CR1</i>      | 0  | 0.0000979   |
| <i>GPR52</i>    | 2  | 0.0000637   |
| <i>CENPW</i>    | 14 | 0.00019109  |
| <i>PRR9</i>     | 7  | 0.000142248 |
| <i>H3C14</i>    | 14 | 0.000167059 |
| <i>H2BC18</i>   | 0  | 0.0000696   |
| <i>H3C15</i>    | 14 | 0.00016754  |
| <i>C6orf163</i> | 2  | 0.000150954 |
| <i>GDI1</i>     | 1  | 0.000284707 |
| <i>LIME1</i>    | 3  | 0.0000912   |
| <i>OOEP</i>     | 7  | 0.000152907 |
| <i>SAMD13</i>   | 7  | 0.000250638 |
| <i>IFIT1B</i>   | 4  | 0.0000705   |
| <i>LIPJ</i>     | 7  | 0.0000268   |
| <i>TRPC5OS</i>  | 7  | 0.000124611 |
| <i>TCEAL6</i>   | 7  | 0.000152754 |
| <i>INPP5B</i>   | 2  | 0.000243291 |
| <i>RPA4</i>     | 3  | 0.000095    |
| <i>MAFB</i>     | 1  | 0.0000283   |
| <i>NHSL2</i>    | 1  | 0.000152521 |
| <i>PHACTR4</i>  | 2  | 0.000147318 |
| <i>ASAH2B</i>   | 3  | 0.0000647   |
| <i>AGAP6</i>    | 2  | 0.000222056 |
| <i>TIMM23B</i>  | 2  | 0.000319566 |
| <i>ZDHHC18</i>  | 1  | 0.00021984  |
| <i>SYT15</i>    | 7  | 0.000219009 |
| <i>TCEA3</i>    | 2  | 0.000052    |
| <i>HSD17B8</i>  | 3  | 0.0000541   |
| <i>OR13C3</i>   | 7  | 0.0000371   |
| <i>HLA-DOA</i>  | 11 | 0.00010623  |
| <i>PSMB8</i>    | 0  | 0.000215555 |
| <i>TAP2</i>     | 0  | 0.0000737   |
| <i>SPIN3</i>    | 3  | 0.000247144 |

|                  |   |             |
|------------------|---|-------------|
| <i>NBDY</i>      | 3 | 0.000114387 |
| <i>HLA-DRA</i>   | 3 | 0.0000649   |
| <i>NOTCH4</i>    | 7 | 0.000221818 |
| <i>PBX2</i>      | 1 | 0.000135404 |
| <i>RNF5</i>      | 3 | 0.0000797   |
| <i>PJVK</i>      | 3 | 0.000145175 |
| <i>FKBPL</i>     | 0 | 0.0000485   |
| <i>MRPL38</i>    | 1 | 0.0000907   |
| <i>SMIM5</i>     | 4 | 0.000136687 |
| <i>BTBD17</i>    | 7 | 0.000196568 |
| <i>C9orf129</i>  | 7 | 0.000121515 |
| <i>LAYN</i>      | 7 | 0.000128798 |
| <i>NEU1</i>      | 0 | 0.000298001 |
| <i>HSPA1A</i>    | 0 | 0.0000495   |
| <i>LSM2</i>      | 2 | 0.0000292   |
| <i>CARD16</i>    | 0 | 0.0000454   |
| <i>MBD5</i>      | 2 | 0.000232832 |
| <i>MSH5</i>      | 1 | 0.0000471   |
| <i>MPIG6B</i>    | 4 | 0.0000772   |
| <i>LY6G6C</i>    | 7 | 0.0000679   |
| <i>LY6G6F</i>    | 4 | 0.000154223 |
| <i>ABHD16A</i>   | 0 | 0.000221079 |
| <i>CSNK2B</i>    | 1 | 0.000214774 |
| <i>GPANK1</i>    | 0 | 0.000366281 |
| <i>PRRC2A</i>    | 1 | 0.00015749  |
| <i>AIF1</i>      | 3 | 0.0000508   |
| <i>LST1</i>      | 0 | 0.000138641 |
| <i>NFKBIL1</i>   | 1 | 0.0000715   |
| <i>ZNF814</i>    | 2 | 0.000118168 |
| <i>HLA-C</i>     | 0 | 0.000029    |
| <i>POU5F1</i>    | 7 | 0.0000773   |
| <i>C6orf136</i>  | 2 | 0.000153894 |
| <i>KRTAP5-11</i> | 7 | 0.000141548 |

|                  |    |             |
|------------------|----|-------------|
| <i>ABCF1</i>     | 2  | 0.000181719 |
| <i>LILRB3</i>    | 1  | 0.000160614 |
| <i>HLA-E</i>     | 0  | 0.00022408  |
| <i>TRIM39</i>    | 0  | 0.000373112 |
| <i>TRIM10</i>    | 4  | 0.000199505 |
| <i>TBC1D8</i>    | 1  | 0.0000579   |
| <i>HLA-F</i>     | 0  | 0.0000794   |
| <i>AKT1S1</i>    | 1  | 0.000142642 |
| <i>GABBR1</i>    | 1  | 0.000107665 |
| <i>C10orf113</i> | 18 | 0.000154847 |
| <i>MALRD1</i>    | 7  | 0.00026842  |
| <i>RANBP17</i>   | 30 | 0.000154847 |
| <i>INSYN2B</i>   | 7  | 0.000127219 |
| <i>MRPL53</i>    | 3  | 0.000333581 |
| <i>MROH6</i>     | 1  | 0.0000246   |
| <i>SPATA31A1</i> | 7  | 0.000179705 |
| <i>TCTN1</i>     | 2  | 0.0000289   |
| <i>KRT40</i>     | 7  | 0.00025488  |
| <i>GRXCR2</i>    | 7  | 0.000262389 |
| <i>ZNF783</i>    | 2  | 0.00034477  |
| <i>ZNF425</i>    | 3  | 0.0000241   |
| <i>FBXO47</i>    | 7  | 0.00023665  |
| <i>C12orf73</i>  | 3  | 0.000229976 |
| <i>PCDHGA1</i>   | 7  | 0.0000236   |
| <i>ERICH4</i>    | 7  | 0.000168353 |
| <i>PRSS1</i>     | 7  | 0.000143493 |
| <i>SPIRE2</i>    | 7  | 0.000225144 |
| <i>AARD</i>      | 7  | 0.000234253 |
| <i>PABPN1L</i>   | 7  | 0.0000272   |
| <i>PKHD1L1</i>   | 4  | 0.000156929 |
| <i>SYCE1L</i>    | 2  | 0.0000242   |
| <i>TMEM231</i>   | 7  | 0.0000328   |
| <i>CCNI2</i>     | 2  | 0.0000468   |

|                  |    |             |
|------------------|----|-------------|
| <i>TMEM240</i>   | 7  | 0.0000803   |
| <i>ACCSL</i>     | 7  | 0.0000432   |
| <i>C4orf47</i>   | 7  | 0.000242914 |
| <i>TRIQK</i>     | 0  | 0.000130972 |
| <i>SDHAF1</i>    | 3  | 0.000140174 |
| <i>PSENEN</i>    | 0  | 0.0000305   |
| <i>SCGB2B2</i>   | 7  | 0.0000248   |
| <i>CCDC144NL</i> | 7  | 0.0000389   |
| <i>E2F4</i>      | 1  | 0.000190308 |
| <i>PDE7A</i>     | 3  | 0.000299733 |
| <i>ADGRG1</i>    | 3  | 0.000160865 |
| <i>PRR13</i>     | 1  | 0.0000796   |
| <i>TECPR1</i>    | 1  | 0.000201244 |
| <i>SAMD9</i>     | 3  | 0.0000343   |
| <i>CNEP1R1</i>   | 0  | 0.000240864 |
| <i>KRT81</i>     | 7  | 0.000231027 |
| <i>CCDC85C</i>   | 7  | 0.000195131 |
| <i>RGL3</i>      | 7  | 0.000237427 |
| <i>TMSB4X</i>    | 3  | 0.000114702 |
| <i>CPT1B</i>     | 1  | 0.0000312   |
| <i>MFSD2B</i>    | 4  | 0.000280211 |
| <i>CDPF1</i>     | 2  | 0.000192725 |
| <i>DPF3</i>      | 7  | 0.0000273   |
| <i>CYP2D7</i>    | 1  | 0.0000402   |
| <i>C17orf107</i> | 25 | 0.000129026 |
| <i>ITPRIPL2</i>  | 0  | 0.000103158 |
| <i>ARRDC5</i>    | 2  | 0.0000405   |
| <i>PLPP6</i>     | 3  | 0.000231846 |
| <i>KLRC3</i>     | 49 | 0.000154847 |
| <i>ZNF316</i>    | 1  | 0.000146694 |
| <i>OLIG2</i>     | 13 | 0.0000977   |
| <i>DOK6</i>      | 7  | 0.0000236   |
| <i>RNASE13</i>   | 7  | 0.000179494 |

|                  |    |             |
|------------------|----|-------------|
| <i>ATP10A</i>    | 2  | 0.000105118 |
| <i>TSSK2</i>     | 7  | 0.0000612   |
| <i>CFAP44</i>    | 2  | 0.000221338 |
| <i>LNP1</i>      | 3  | 0.0000695   |
| <i>TRIM71</i>    | 7  | 0.0003008   |
| <i>ZCWPW2</i>    | 3  | 0.0000241   |
| <i>ANKRD28</i>   | 3  | 0.000145318 |
| <i>METTL6</i>    | 3  | 0.000402439 |
| <i>SELENOH</i>   | 3  | 0.000154823 |
| <i>AKR7L</i>     | 7  | 0.000277708 |
| <i>STK38L</i>    | 0  | 0.000216437 |
| <i>SLC48A1</i>   | 4  | 0.0000413   |
| <i>TAS2R50</i>   | 3  | 0.0000563   |
| <i>TAS2R13</i>   | 2  | 0.0000572   |
| <i>KRTAP16-1</i> | 7  | 0.0000287   |
| <i>OR2A42</i>    | 7  | 0.000177741 |
| <i>MT-ND4L</i>   | 48 | 0.000184975 |
| <i>MAP10</i>     | 3  | 0.0000417   |
| <i>KRTAP10-3</i> | 7  | 0.0000534   |
| <i>POU5F1B</i>   | 3  | 0.0000494   |
| <i>ZNF611</i>    | 0  | 0.000201694 |
| <i>NUP62</i>     | 1  | 0.000109452 |
| <i>SFT2D2</i>    | 2  | 0.000219216 |
| <i>FGFR10P</i>   | 2  | 0.00014505  |
| <i>CRYGS</i>     | 3  | 0.00029734  |
| <i>LINGO4</i>    | 7  | 0.0000502   |
| <i>FAM24B</i>    | 3  | 0.000117563 |
| <i>ASIC3</i>     | 7  | 0.000194974 |
| <i>SUPT4H1</i>   | 0  | 0.0000998   |
| <i>LTC4S</i>     | 1  | 0.0000835   |
| <i>QTRT1</i>     | 2  | 0.00017582  |
| <i>MXD3</i>      | 0  | 0.0000651   |
| <i>ARHGAP19</i>  | 0  | 0.000198885 |

|                |   |             |
|----------------|---|-------------|
| <i>HAUS7</i>   | 2 | 0.0000804   |
| <i>LCAT</i>    | 1 | 0.0000908   |
| <i>GPC2</i>    | 2 | 0.0000279   |
| <i>SIPA1</i>   | 1 | 0.000209016 |
| <i>ERV3-1</i>  | 0 | 0.0000797   |
| <i>ARL2</i>    | 3 | 0.000187807 |
| <i>TTLL13P</i> | 7 | 0.0000239   |
| <i>LEPROT</i>  | 2 | 0.000167351 |
| <i>LBH</i>     | 3 | 0.0000986   |
| <i>PPP1CB</i>  | 3 | 0.000110141 |
| <i>GPSM3</i>   | 1 | 0.00010592  |
| <i>LAT</i>     | 1 | 0.0000734   |
| <i>NCKIPSD</i> | 1 | 0.000196185 |
| <i>S1PR3</i>   | 2 | 0.0000254   |
| <i>SLC35F6</i> | 1 | 0.000215852 |
| <i>CLIC1</i>   | 0 | 0.000188032 |
| <i>DDAH2</i>   | 0 | 0.000138355 |
| <i>RPS29</i>   | 3 | 0.0000482   |
| <i>UGT2B11</i> | 7 | 0.0000768   |
| <i>ZNF134</i>  | 3 | 0.000359755 |
| <i>DDX47</i>   | 2 | 0.000286534 |
| <i>ZNF888</i>  | 3 | 0.000139549 |
| <i>ZNF845</i>  | 3 | 0.0000901   |
| <i>KLRK1</i>   | 3 | 0.0000734   |
| <i>KCTD11</i>  | 3 | 0.0000602   |
| <i>SLC23A3</i> | 1 | 0.0000237   |
| <i>LTB4R</i>   | 0 | 0.000103488 |
| <i>IRF9</i>    | 1 | 0.0000581   |
| <i>CLDN9</i>   | 1 | 0.0000256   |
| <i>NUDT19</i>  | 3 | 0.000151615 |
| <i>ZNF726</i>  | 3 | 0.0000999   |
| <i>ZNF90</i>   | 0 | 0.0000242   |
| <i>NAXD</i>    | 3 | 0.000338263 |

|                  |    |             |
|------------------|----|-------------|
| <i>MEF2B</i>     | 1  | 0.0000497   |
| <i>GANC</i>      | 2  | 0.00033342  |
| <i>FBXO16</i>    | 7  | 0.000262753 |
| <i>ARL16</i>     | 3  | 0.0000581   |
| <i>LYRM4</i>     | 3  | 0.000145165 |
| <i>MYCBP</i>     | 0  | 0.000262036 |
| <i>ALG3</i>      | 2  | 0.00025606  |
| <i>C19orf38</i>  | 0  | 0.0000975   |
| <i>C17orf67</i>  | 2  | 0.000174444 |
| <i>FIS1</i>      | 4  | 0.000151273 |
| <i>MBLAC1</i>    | 3  | 0.0000431   |
| <i>EFCAB9</i>    | 7  | 0.0000427   |
| <i>LCNL1</i>     | 7  | 0.0000381   |
| <i>PLIN5</i>     | 1  | 0.0000655   |
| <i>C10orf105</i> | 1  | 0.0000767   |
| <i>IFRD2</i>     | 4  | 0.000113292 |
| <i>HNRNPUL2</i>  | 2  | 0.000360387 |
| <i>MS4A4E</i>    | 0  | 0.0000307   |
| <i>MTCP1</i>     | 3  | 0.000213047 |
| <i>ARHGEF28</i>  | 7  | 0.0000678   |
| <i>LRRC69</i>    | 2  | 0.000236657 |
| <i>UBXN2B</i>    | 0  | 0.000218765 |
| <i>CBWD6</i>     | 0  | 0.0000675   |
| <i>PRSS41</i>    | 13 | 0.000045    |
| <i>NLRP2B</i>    | 7  | 0.000180046 |
| <i>MSMP</i>      | 7  | 0.000146008 |
| <i>FAM166B</i>   | 7  | 0.000161136 |
| <i>FASTKD5</i>   | 3  | 0.000392444 |
| <i>GOLGA8B</i>   | 2  | 0.0000672   |
| <i>SCRT2</i>     | 7  | 0.000241673 |
| <i>SIAH3</i>     | 7  | 0.000291398 |
| <i>EFCAB8</i>    | 7  | 0.000076    |
| <i>GAB4</i>      | 7  | 0.000173643 |

|                  |    |             |
|------------------|----|-------------|
| <i>C20orf202</i> | 7  | 0.0000299   |
| <i>TNFRSF25</i>  | 2  | 0.0000746   |
| <i>SLC35E2A</i>  | 1  | 0.0000317   |
| <i>CYB5RL</i>    | 2  | 0.000125978 |
| <i>TTC34</i>     | 1  | 0.0000481   |
| <i>IFI30</i>     | 0  | 0.0000358   |
| <i>CCDC7</i>     | 3  | 0.0000881   |
| <i>FNIP1</i>     | 0  | 0.000217951 |
| <i>SYCE3</i>     | 7  | 0.0000614   |
| <i>CKLF</i>      | 0  | 0.000203732 |
| <i>PAM16</i>     | 1  | 0.000182331 |
| <i>ZNF579</i>    | 7  | 0.0000706   |
| <i>RNASEK</i>    | 0  | 0.00003     |
| <i>NBPF1</i>     | 50 | 0.000154847 |
| <i>FAM228B</i>   | 3  | 0.000242952 |
| <i>C6orf226</i>  | 3  | 0.0000251   |
| <i>PPP3R1</i>    | 4  | 0.0000673   |
| <i>AP4M1</i>     | 1  | 0.0000608   |
| <i>TAS2R41</i>   | 42 | 0.000154847 |
| <i>CEBPD</i>     | 0  | 0.0000377   |
| <i>OR3A2</i>     | 40 | 0.000154847 |
| <i>ARIH2OS</i>   | 3  | 0.000110141 |
| <i>ZBED8</i>     | 3  | 0.0000932   |
| <i>HMSD</i>      | 7  | 0.000267555 |
| <i>NPTXR</i>     | 7  | 0.00005     |
| <i>TRIM16</i>    | 2  | 0.000195404 |
| <i>FADS3</i>     | 1  | 0.0000394   |
| <i>UBA52</i>     | 4  | 0.0000741   |
| <i>MYBPHL</i>    | 7  | 0.000166697 |
| <i>ZNF630</i>    | 2  | 0.0000469   |
| <i>TIAF1</i>     | 2  | 0.0000912   |
| <i>FAM185A</i>   | 3  | 0.000313878 |
| <i>PSMB11</i>    | 7  | 0.000213614 |

|                   |    |             |
|-------------------|----|-------------|
| <i>EXOSC6</i>     | 3  | 0.000270721 |
| <i>ZNF844</i>     | 0  | 0.0000522   |
| <i>HBD</i>        | 46 | 0.000154847 |
| <i>HLA-DPB1</i>   | 3  | 0.0000626   |
| <i>PRR29</i>      | 7  | 0.000212954 |
| <i>HNRNPA1P48</i> | 3  | 0.0000255   |
| <i>NDUFAF8</i>    | 3  | 0.0000901   |
| <i>PRRT4</i>      | 7  | 0.000228874 |
| <i>Z82206.1</i>   | 2  | 0.0000514   |
| <i>C2CD4D</i>     | 7  | 0.000201664 |
| <i>NOL7</i>       | 3  | 0.00037786  |
| <i>PIGBOS1</i>    | 0  | 0.000237524 |
| <i>FTCDNL1</i>    | 2  | 0.0000718   |
| <i>TEX22</i>      | 1  | 0.0000313   |
| <i>TAS2R46</i>    | 3  | 0.0000624   |
| <i>ZNF717</i>     | 3  | 0.000200046 |
| <i>SCAMP4</i>     | 1  | 0.000117566 |
| <i>LTB</i>        | 3  | 0.0000816   |
| <i>TEX46</i>      | 7  | 0.0000502   |
| <i>POLR2J2</i>    | 35 | 0.000154847 |
| <i>MT-ATP8</i>    | 48 | 0.0000847   |
| <i>FAM174C</i>    | 3  | 0.0000872   |
| <i>C2orf92</i>    | 2  | 0.0000268   |
| <i>FNDC10</i>     | 7  | 0.0000342   |
| <i>PROB1</i>      | 7  | 0.000297256 |
| <i>ARL17B</i>     | 41 | 0.000154847 |
| <i>PATL2</i>      | 3  | 0.0000302   |
| <i>PRPS1L1</i>    | 7  | 0.000170392 |
| <i>NFE4</i>       | 34 | 0.000154847 |
| <i>PPP5D1</i>     | 7  | 0.0000263   |
| <i>CFAP97D1</i>   | 7  | 0.000251367 |
| <i>HLA-DPA1</i>   | 3  | 0.0000379   |
| <i>RPS18</i>      | 3  | 0.0000712   |

|                 |    |             |
|-----------------|----|-------------|
| <i>TMEM253</i>  | 7  | 0.00011093  |
| <i>OR52I1</i>   | 7  | 0.000171158 |
| <i>AJM1</i>     | 1  | 0.0000263   |
| <i>GOLGA8N</i>  | 3  | 0.0000244   |
| <i>RAB6D</i>    | 7  | 0.00021491  |
| <i>GPX1</i>     | 4  | 0.0000451   |
| <i>TWIST2</i>   | 7  | 0.0000795   |
| <i>H2BC15</i>   | 3  | 0.0000469   |
| <i>ZNF736</i>   | 3  | 0.000252218 |
| <i>PINLYP</i>   | 7  | 0.0000527   |
| <i>CLDN34</i>   | 7  | 0.000024    |
| <i>HLA-B</i>    | 0  | 0.0000854   |
| <i>SHISA8</i>   | 7  | 0.000113306 |
| <i>C19orf81</i> | 7  | 0.000275514 |
| <i>BRD3OS</i>   | 2  | 0.000150466 |
| <i>NFAM1</i>    | 1  | 0.000126803 |
| <i>KIAA0040</i> | 0  | 0.000175377 |
| <i>CLEC2L</i>   | 7  | 0.000146661 |
| <i>SLFN14</i>   | 4  | 0.0000424   |
| <i>UBE2L5</i>   | 7  | 0.000112859 |
| <i>CTAGE9</i>   | 7  | 0.00021963  |
| <i>C3orf84</i>  | 7  | 0.000140455 |
| <i>B3GNT9</i>   | 1  | 0.0000515   |
| <i>ZNF737</i>   | 3  | 0.000106027 |
| <i>RGL2</i>     | 1  | 0.000232817 |
| <i>KIFC1</i>    | 14 | 0.000111762 |
| <i>C2orf74</i>  | 3  | 0.0000865   |
| <i>FAM200B</i>  | 0  | 0.000174902 |
| <i>OR2I1P</i>   | 8  | 0.00010787  |
| <i>LRRC37A2</i> | 2  | 0.0000492   |
| <i>MPC1L</i>    | 7  | 0.000026    |
| <i>OR2W3</i>    | 4  | 0.0000935   |
| <i>TXNDC5</i>   | 15 | 0.000108549 |

|                   |    |             |
|-------------------|----|-------------|
| <i>CASTOR1</i>    | 3  | 0.0000657   |
| <i>ALKBH6</i>     | 2  | 0.0000881   |
| <i>CASTOR3</i>    | 1  | 0.000186422 |
| <i>NME1</i>       | 3  | 0.0000646   |
| <i>TNFSF12</i>    | 1  | 0.0000255   |
| <i>APOBEC3G</i>   | 3  | 0.0000836   |
| <i>TLR9</i>       | 1  | 0.0000263   |
| <i>DEFA3</i>      | 10 | 0.000132304 |
| <i>LILRA2</i>     | 1  | 0.000185611 |
| <i>AMY2B</i>      | 3  | 0.000292793 |
| <i>PSMB9</i>      | 0  | 0.0000927   |
| <i>PCDHGC3</i>    | 51 | 0.000137184 |
| <i>DEFA1B</i>     | 10 | 0.0000774   |
| <i>ACAD11</i>     | 3  | 0.000242056 |
| <i>FOXO3B</i>     | 4  | 0.000034    |
| <i>TNFRSF13B</i>  | 11 | 0.0000667   |
| <i>ISY1</i>       | 0  | 0.000377315 |
| <i>PNMA2</i>      | 11 | 0.0000586   |
| <i>LRRD1</i>      | 7  | 0.000248421 |
| <i>KRBOX1</i>     | 7  | 0.000149924 |
| <i>PCDHGC5</i>    | 51 | 0.0000611   |
| <i>ARHGEF25</i>   | 7  | 0.000274005 |
| <i>YAE1</i>       | 3  | 0.000226256 |
| <i>RPP21</i>      | 2  | 0.000025    |
| <i>CD302</i>      | 0  | 0.00012193  |
| <i>ARHGAP8</i>    | 7  | 0.000201465 |
| <i>AC244197.3</i> | 1  | 0.00011784  |
| <i>ARPC4</i>      | 0  | 0.000243967 |
| <i>INMT</i>       | 7  | 0.000209259 |
| <i>ARPC1A</i>     | 0  | 0.000333751 |
| <i>ATP5PO</i>     | 3  | 0.000176705 |
| <i>C8orf58</i>    | 1  | 0.00011411  |
| <i>PISD</i>       | 1  | 0.00017683  |

|                 |    |             |
|-----------------|----|-------------|
| <i>PWP2</i>     | 33 | 0.000154847 |
| <i>HYPK</i>     | 2  | 0.000288487 |
| <i>MTFP1</i>    | 3  | 0.0000429   |
| <i>TCP10L</i>   | 7  | 0.0000582   |
| <i>ARFGAP3</i>  | 0  | 0.000364882 |
| <i>PEG10</i>    | 27 | 0.000154847 |
| <i>PCDHGC4</i>  | 51 | 0.0000829   |
| <i>HLA-DMB</i>  | 3  | 0.000137654 |
| <i>AP5Z1</i>    | 1  | 0.000252657 |
| <i>STRC</i>     | 7  | 0.000279164 |
| <i>MICAL3</i>   | 2  | 0.000103915 |
| <i>PRAF2</i>    | 1  | 0.000109829 |
| <i>STMP1</i>    | 4  | 0.0000961   |
| <i>EFNA4</i>    | 0  | 0.000137028 |
| <i>TICAM2</i>   | 0  | 0.0000434   |
| <i>C4orf48</i>  | 3  | 0.0000349   |
| <i>NAA80</i>    | 1  | 0.0000583   |
| <i>UPK3B</i>    | 1  | 0.0000747   |
| <i>IL10RB</i>   | 1  | 0.000256329 |
| <i>ZNF487</i>   | 0  | 0.000138434 |
| <i>WDR92</i>    | 3  | 0.000309296 |
| <i>PLA2G4B</i>  | 1  | 0.0000389   |
| <i>NPIP5</i>    | 1  | 0.0000267   |
| <i>JMJD7</i>    | 1  | 0.000104505 |
| <i>APOBEC3D</i> | 2  | 0.0000447   |
| <i>TUBA4B</i>   | 7  | 0.000130704 |
| <i>MRPS6</i>    | 2  | 0.000209295 |
| <i>DBNDD2</i>   | 2  | 0.0000494   |
| <i>ETV5</i>     | 7  | 0.000301713 |
| <i>KRTAP5-7</i> | 7  | 0.000195895 |
| <i>SCARF2</i>   | 7  | 0.0000976   |
| <i>ASPRV1</i>   | 1  | 0.0000398   |
| <i>HBB</i>      | 46 | 0.000154847 |

|                       |    |             |
|-----------------------|----|-------------|
| <i>CEBPA</i>          | 0  | 0.0000467   |
| <i>H2AJ</i>           | 4  | 0.0000901   |
| <i>UBAP1L</i>         | 2  | 0.000152157 |
| <i>MARS2</i>          | 3  | 0.000304111 |
| <i>USP51</i>          | 3  | 0.0000248   |
| <i>BCKDHA</i>         | 2  | 0.0000397   |
| <i>CDK11B</i>         | 0  | 0.000238336 |
| <i>TARM1</i>          | 10 | 0.0000605   |
| <i>POU5F2</i>         | 2  | 0.000141654 |
| <i>ABHD14A</i>        | 3  | 0.0000298   |
| <i>STIMATE-MUSTN1</i> | 1  | 0.000041    |
| <i>RBM14-RBM4</i>     | 2  | 0.000275819 |
| <i>CCDC153</i>        | 0  | 0.0000246   |
| <i>ACTN3</i>          | 7  | 0.000288751 |
| <i>HAUS5</i>          | 2  | 0.000147949 |
| <i>TAF11L12</i>       | 7  | 0.0000991   |
| <i>AP000311.1</i>     | 3  | 0.000024    |
| <i>ZNF324B</i>        | 2  | 0.000222734 |
| <i>LINC02218</i>      | 0  | 0.0000505   |
| <i>ZNF564</i>         | 1  | 0.000134062 |
| <i>HS3ST5</i>         | 7  | 0.000266737 |
| <i>TERB1</i>          | 7  | 0.000137933 |
| <i>YJEFN3</i>         | 1  | 0.0000386   |
| <i>ARPC4-TTLL3</i>    | 2  | 0.0000235   |
| <i>PTTG2</i>          | 0  | 0.0000703   |
| <i>SMIM20</i>         | 3  | 0.000143941 |
| <i>GYPB</i>           | 4  | 0.0000278   |
| <i>CHCHD10</i>        | 1  | 0.0000238   |
| <i>ATP6V1E2</i>       | 3  | 0.000117046 |
| <i>AC068580.4</i>     | 1  | 0.000026    |
| <i>AC010255.3</i>     | 7  | 0.000272845 |
| <i>TMED7-TICAM2</i>   | 3  | 0.0000434   |
| <i>FOXD1</i>          | 7  | 0.000174629 |

|                        |    |             |
|------------------------|----|-------------|
| <i>AC005324.3</i>      | 7  | 0.000166015 |
| <i>PTX4</i>            | 7  | 0.0000296   |
| <i>PCDHGA12</i>        | 51 | 0.000202062 |
| <i>C8orf88</i>         | 0  | 0.0000248   |
| <i>CCDC71L</i>         | 0  | 0.0000619   |
| <i>HOXA10</i>          | 7  | 0.000194363 |
| <i>PCDHGB6</i>         | 51 | 0.000178943 |
| <i>PCDHGA5</i>         | 51 | 0.000148823 |
| <i>PCDHGA7</i>         | 51 | 0.000165842 |
| <i>EIF5AL1</i>         | 7  | 0.0000284   |
| <i>PRKDC</i>           | 2  | 0.000255315 |
| <i>PCDHGA6</i>         | 51 | 0.000148823 |
| <i>PCDHGA8</i>         | 51 | 0.000165842 |
| <i>PCDHGA10</i>        | 51 | 0.000130565 |
| <i>PCDHGA11</i>        | 51 | 0.000130565 |
| <i>PCDHGB2</i>         | 51 | 0.000148823 |
| <i>PCDHGB4</i>         | 51 | 0.000165842 |
| <i>LYN</i>             | 0  | 0.000224497 |
| <i>PCDHGB7</i>         | 51 | 0.000130565 |
| <i>PCDHGA3</i>         | 7  | 0.0000236   |
| <i>AP002495.1</i>      | 3  | 0.000287832 |
| <i>AP5B1</i>           | 1  | 0.000146634 |
| <i>ARMS2</i>           | 7  | 0.000116335 |
| <i>MEX3A</i>           | 7  | 0.000253877 |
| <i>CKLF-CMTM1</i>      | 1  | 0.000101495 |
| <i>MPV17L2</i>         | 3  | 0.00005     |
| <i>BORCS8</i>          | 1  | 0.000175665 |
| <i>ANKHD1-EIF4EBP3</i> | 2  | 0.000179998 |
| <i>CHMP1B</i>          | 0  | 0.000237529 |
| <i>HTD2</i>            | 2  | 0.0000248   |
| <i>CARD17</i>          | 5  | 0.0000573   |
| <i>OOSP4B</i>          | 7  | 0.000206218 |
| <i>HCAR3</i>           | 0  | 0.0000751   |

|                   |    |             |
|-------------------|----|-------------|
| <i>EBLN2</i>      | 0  | 0.00025791  |
| <i>FDXACB1</i>    | 3  | 0.000116011 |
| <i>RAB44</i>      | 13 | 0.000163033 |
| <i>AC068775.1</i> | 49 | 0.000154847 |
| <i>MTRNR2L8</i>   | 52 | 0.000154847 |
| <i>TAS2R20</i>    | 3  | 0.000066    |
| <i>TRAPPC2B</i>   | 3  | 0.0000253   |
| <i>TAS2R30</i>    | 3  | 0.000142199 |
| <i>MTRNR2L3</i>   | 7  | 0.000046    |
| <i>ZNF10</i>      | 3  | 0.000230461 |
| <i>ZNF486</i>     | 0  | 0.0000873   |
| <i>SMIM3</i>      | 0  | 0.0000771   |
| <i>HMBS</i>       | 4  | 0.0000261   |
| <i>DND1</i>       | 1  | 0.0000325   |
| <i>CLEC12B</i>    | 37 | 0.000154847 |
| <i>PGA5</i>       | 7  | 0.000163958 |
| <i>STH</i>        | 7  | 0.0000306   |
| <i>KLRF2</i>      | 7  | 0.000163863 |
| <i>CAPNS2</i>     | 0  | 0.0000451   |
| <i>GPR142</i>     | 7  | 0.000186516 |
| <i>C11orf97</i>   | 7  | 0.000247257 |
| <i>DENND11</i>    | 2  | 0.000315651 |
| <i>NHLRC4</i>     | 3  | 0.0000385   |
| <i>MGAM</i>       | 1  | 0.0000815   |
| <i>FNTB</i>       | 2  | 0.000149685 |
| <i>AC023055.1</i> | 3  | 0.000108311 |
| <i>INAFM1</i>     | 0  | 0.0000509   |
| <i>MGAM2</i>      | 1  | 0.0000254   |
| <i>C17orf49</i>   | 2  | 0.0000246   |
| <i>PDF</i>        | 3  | 0.0000924   |
| <i>AC005726.1</i> | 1  | 0.0000352   |
| <i>TRIM34</i>     | 0  | 0.0000313   |
| <i>MC1R</i>       | 2  | 0.000103407 |

|                     |    |             |
|---------------------|----|-------------|
| <i>AC007040.2</i>   | 7  | 0.000303723 |
| <i>CEP95</i>        | 2  | 0.000336816 |
| <i>TUBB3</i>        | 7  | 0.00023284  |
| <i>ITGB3</i>        | 4  | 0.000177003 |
| <i>ZHX1-C8orf76</i> | 2  | 0.0000268   |
| <i>INAFM2</i>       | 0  | 0.000101119 |
| <i>ST20-MTHFS</i>   | 0  | 0.0000258   |
| <i>GH1</i>          | 7  | 0.00005     |
| <i>THTPA</i>        | 2  | 0.000201817 |
| <i>SLC22A31</i>     | 7  | 0.000249466 |
| <i>AC107871.1</i>   | 2  | 0.0000482   |
| <i>CCDC187</i>      | 7  | 0.000310457 |
| <i>ARMH2</i>        | 0  | 0.000024    |
| <i>C16orf95</i>     | 7  | 0.000204918 |
| <i>AL049634.2</i>   | 0  | 0.000110954 |
| <i>XKR7</i>         | 7  | 0.00031442  |
| <i>CCPG1</i>        | 0  | 0.000221469 |
| <i>SULT1A3</i>      | 1  | 0.0000271   |
| <i>GOLGA8T</i>      | 7  | 0.000111503 |
| <i>FIGNL2</i>       | 7  | 0.0000597   |
| <i>AC010325.1</i>   | 7  | 0.0000954   |
| <i>PECAM1</i>       | 1  | 0.000257834 |
| <i>TUBB8</i>        | 7  | 0.00016606  |
| <i>TMEM249</i>      | 7  | 0.000101796 |
| <i>PCDHGA9</i>      | 51 | 0.000242885 |
| <i>OCLM</i>         | 2  | 0.0000757   |
| <i>PCDHGB3</i>      | 51 | 0.000148823 |
| <i>CORO7</i>        | 1  | 0.000233061 |
| <i>CCER2</i>        | 7  | 0.000167954 |
| <i>C19orf84</i>     | 7  | 0.00025401  |
| <i>GTF2I</i>        | 2  | 0.000265577 |
| <i>MYZAP</i>        | 29 | 0.000154847 |
| <i>PPIAL4C</i>      | 2  | 0.0000235   |

|                      |    |             |
|----------------------|----|-------------|
| <i>FAM72C</i>        | 14 | 0.0000296   |
| <i>LINC00672</i>     | 2  | 0.0000412   |
| <i>NBPF11</i>        | 2  | 0.000249427 |
| <i>RHEX</i>          | 23 | 0.0000908   |
| <i>NOTCH2NLA</i>     | 2  | 0.0000362   |
| <i>OTUD7B</i>        | 3  | 0.000217769 |
| <i>AC134669.1</i>    | 0  | 0.0000245   |
| <i>FSBP</i>          | 3  | 0.0000245   |
| <i>TXNIP</i>         | 0  | 0.000196671 |
| <i>NBPF15</i>        | 2  | 0.000152039 |
| <i>NCOA4</i>         | 4  | 0.0000848   |
| <i>MRPS21</i>        | 3  | 0.000190427 |
| <i>MYO15B</i>        | 1  | 0.000116508 |
| <i>AC008770.2</i>    | 2  | 0.0000238   |
| <i>C17orf113</i>     | 7  | 0.0000298   |
| <i>ATF7-NPFF</i>     | 2  | 0.0000499   |
| <i>ZNF285</i>        | 47 | 0.000126317 |
| <i>S1PR2</i>         | 1  | 0.000028    |
| <i>NDUFA7</i>        | 1  | 0.0000342   |
| <i>NBPF12</i>        | 2  | 0.000204299 |
| <i>SMIM17</i>        | 7  | 0.000197171 |
| <i>FAM156A</i>       | 2  | 0.000104878 |
| <i>AC008878.3</i>    | 2  | 0.0000323   |
| <i>MTRNR2L12</i>     | 52 | 0.000154847 |
| <i>IKBKG</i>         | 1  | 0.000251948 |
| <i>SPIB</i>          | 11 | 0.000153424 |
| <i>TMEM185A</i>      | 2  | 0.000347955 |
| <i>NBPF9</i>         | 2  | 0.000115501 |
| <i>CCDC194</i>       | 5  | 0.0000396   |
| <i>EGLN2</i>         | 2  | 0.000225979 |
| <i>MEI4</i>          | 7  | 0.000138405 |
| <i>ZNF559-ZNF177</i> | 2  | 0.0000437   |
| <i>NCBP2AS2</i>      | 3  | 0.000209894 |

|                     |    |             |
|---------------------|----|-------------|
| <i>H4C15</i>        | 14 | 0.0000367   |
| <i>HEATR9</i>       | 3  | 0.0000894   |
| <i>NBPF14</i>       | 1  | 0.000082    |
| <i>GAS2L2</i>       | 7  | 0.000292792 |
| <i>C17orf50</i>     | 7  | 0.000229062 |
| <i>H4C14</i>        | 14 | 0.0000481   |
| <i>RASL10B</i>      | 7  | 0.000313865 |
| <i>TLCD4-RWDD3</i>  | 3  | 0.0000985   |
| <i>AC240274.1</i>   | 50 | 0.000154847 |
| <i>NBPF19</i>       | 2  | 0.000103987 |
| <i>NBPF10</i>       | 0  | 0.0000661   |
| <i>CCL5</i>         | 3  | 0.0000552   |
| <i>GTF2H5</i>       | 3  | 0.000112088 |
| <i>IFNL4</i>        | 7  | 0.000242788 |
| <i>FAM47E-STBD1</i> | 7  | 0.0000239   |
| <i>DOC2B</i>        | 7  | 0.000279619 |
| <i>ATP6V1FNB</i>    | 7  | 0.0000653   |
| <i>AL121845.3</i>   | 3  | 0.0000247   |
| <i>SNURF</i>        | 2  | 0.0000675   |
| <i>AC092042.3</i>   | 7  | 0.0000278   |
| <i>FOXD4L6</i>      | 7  | 0.0000259   |
| <i>H4C12</i>        | 3  | 0.0000271   |
| <i>CWC25</i>        | 0  | 0.000321197 |
| <i>EPOP</i>         | 7  | 0.000278379 |
| <i>H2BC14</i>       | 14 | 0.000198896 |
| <i>CYFIP1</i>       | 0  | 0.0000814   |
| <i>H2BC8</i>        | 14 | 0.000212576 |
| <i>USP27X</i>       | 3  | 0.000217194 |
| <i>H3C8</i>         | 14 | 0.000089    |
| <i>CASTOR2</i>      | 1  | 0.0000378   |
| <i>NATD1</i>        | 1  | 0.000073    |
| <i>H2BC6</i>        | 14 | 0.000188755 |
| <i>C8orf89</i>      | 7  | 0.0000242   |

|                   |    |             |
|-------------------|----|-------------|
| <i>H2BC17</i>     | 14 | 0.000171105 |
| <i>KRTAP7-1</i>   | 7  | 0.0000867   |
| <i>PANO1</i>      | 7  | 0.000071    |
| <i>H2AC12</i>     | 14 | 0.00010591  |
| <i>ZNF280B</i>    | 3  | 0.0000256   |
| <i>NUDT18</i>     | 3  | 0.000116168 |
| <i>H4C13</i>      | 14 | 0.0000794   |
| <i>LENG9</i>      | 3  | 0.0000747   |
| <i>H2AC15</i>     | 3  | 0.0000578   |
| <i>CCL4</i>       | 3  | 0.000093    |
| <i>PRAG1</i>      | 1  | 0.00006     |
| <i>C7orf77</i>    | 7  | 0.0000884   |
| <i>H3C11</i>      | 3  | 0.000052    |
| <i>CCL18</i>      | 7  | 0.000190259 |
| <i>FP565260.1</i> | 53 | 0.000154847 |
| <i>C17orf98</i>   | 7  | 0.0000671   |
| <i>H4C7</i>       | 7  | 0.0000248   |
| <i>H2BC9</i>      | 14 | 0.000225869 |
| <i>PRSS2</i>      | 7  | 0.000190644 |
| <i>DUSP14</i>     | 3  | 0.0000243   |
| <i>UHRF1</i>      | 14 | 0.000091    |
| <i>H4C9</i>       | 3  | 0.0000528   |
| <i>ANKRD20A3</i>  | 7  | 0.000145218 |
| <i>PIK3R6</i>     | 13 | 0.000219085 |
| <i>OR4E1</i>      | 7  | 0.000119713 |
| <i>PIP4K2B</i>    | 3  | 0.000354577 |
| <i>H2AC14</i>     | 14 | 0.0000603   |
| <i>H2BC3</i>      | 14 | 0.000202275 |
| <i>PCDHGB5</i>    | 51 | 0.000242885 |
| <i>PADI6</i>      | 7  | 0.000110143 |
| <i>H2AC16</i>     | 14 | 0.0000572   |
| <i>H4C5</i>       | 3  | 0.0000749   |
| <i>H2AC8</i>      | 3  | 0.000132966 |

|                   |    |             |
|-------------------|----|-------------|
| <i>TYW1B</i>      | 2  | 0.000212325 |
| <i>H4C4</i>       | 14 | 0.000188313 |
| <i>PIGW</i>       | 3  | 0.000265867 |
| <i>H2BC7</i>      | 14 | 0.0000687   |
| <i>MARCKS</i>     | 0  | 0.0000357   |
| <i>ZNF670</i>     | 3  | 0.0000959   |
| <i>H3C7</i>       | 14 | 0.000116139 |
| <i>PSMB3</i>      | 0  | 0.000166366 |
| <i>GOLGA6L22</i>  | 7  | 0.0000531   |
| <i>RDM1</i>       | 7  | 0.0000314   |
| <i>TEX28</i>      | 7  | 0.0000304   |
| <i>SSTR3</i>      | 3  | 0.000025    |
| <i>ZNF229</i>     | 47 | 0.000183376 |
| <i>H2AC4</i>      | 14 | 0.0000768   |
| <i>ACACA</i>      | 2  | 0.000253574 |
| <i>H2BC10</i>     | 14 | 0.000232345 |
| <i>MRM1</i>       | 2  | 0.000148276 |
| <i>H4C1</i>       | 14 | 0.000162685 |
| <i>GOLGA6L10</i>  | 7  | 0.0000237   |
| <i>H4C2</i>       | 3  | 0.0000584   |
| <i>H3C10</i>      | 4  | 0.0000432   |
| <i>MRPL45</i>     | 3  | 0.000205738 |
| <i>TSTD3</i>      | 7  | 0.000244974 |
| <i>OR2L8</i>      | 44 | 0.000144969 |
| <i>OR52R1</i>     | 7  | 0.000142621 |
| <i>GATD3B</i>     | 53 | 0.000154847 |
| <i>FP565260.6</i> | 3  | 0.0000833   |
| <i>PAGR1</i>      | 1  | 0.0000707   |
| <i>TMEM272</i>    | 0  | 0.0000249   |
| <i>BLACAT1</i>    | 7  | 0.000157823 |
| <i>ADORA3</i>     | 13 | 0.000149962 |
| <i>C13orf46</i>   | 1  | 0.0000779   |
| <i>AC001226.2</i> | 7  | 0.000223809 |

|                      |    |             |
|----------------------|----|-------------|
| <i>AC118553.2</i>    | 2  | 0.000215728 |
| <i>AC116366.3</i>    | 3  | 0.0000296   |
| <i>PRR33</i>         | 7  | 0.000197704 |
| <i>TPTEP2-CSNK1E</i> | 1  | 0.000024    |
| <i>AC004922.1</i>    | 0  | 0.0000761   |
| <i>AL590132.1</i>    | 7  | 0.0000771   |
| <i>TAF11L2</i>       | 1  | 0.000024    |
| <i>THSD8</i>         | 7  | 0.000148882 |
| <i>AC092718.8</i>    | 7  | 0.0000982   |
| <i>AC015802.6</i>    | 1  | 0.0000913   |
| <i>AC073111.4</i>    | 2  | 0.000135322 |
| <i>TMDD1</i>         | 7  | 0.0000716   |
| <i>AC114490.3</i>    | 2  | 0.0000845   |
| <i>SMIM41</i>        | 7  | 0.000152885 |
| <i>ARHGAP11B</i>     | 3  | 0.0000238   |
| <i>BX255925.3</i>    | 1  | 0.0000852   |
| <i>AC093512.2</i>    | 7  | 0.0000283   |
| <i>TBCE</i>          | 3  | 0.000159865 |
| <i>ATXN7</i>         | 2  | 0.000141004 |
| <i>POLR2J3</i>       | 35 | 0.000154847 |
| <i>AP000646.1</i>    | 4  | 0.0000357   |
| <i>AC097634.4</i>    | 0  | 0.0000236   |
| <i>AP001267.5</i>    | 2  | 0.0000306   |
| <i>AC008676.3</i>    | 7  | 0.000149687 |
| <i>AC072022.2</i>    | 0  | 0.0000271   |
| <i>AL135905.2</i>    | 0  | 0.0000373   |

Supplementary Table 9. Functional enrichment analysis of network community maps

| Enriched Pathway                                                        | P (adj)  | (-log10) P | Term size | Intersection size | Enrichment | Community |
|-------------------------------------------------------------------------|----------|------------|-----------|-------------------|------------|-----------|
| INNATE IMMUNE SYSTEM (REACTOME)                                         | 1.10E-36 | 35.96      | 1104      | 192               | 0.1739     | 0         |
| NEUTROPHIL DEGRANULATION (REACTOME)                                     | 2.41E-34 | 33.62      | 478       | 116               | 0.2427     | 0         |
| RRNA PROCESSING (REACTOME)                                              | 1.12E-18 | 17.95      | 205       | 56                | 0.2732     | 3         |
| RRNA PROCESSING IN THE NUCLEUS AND CYTOSOL (REACTOME)                   | 1.76E-18 | 17.75      | 193       | 54                | 0.2798     | 3         |
| INTERFERON SIGNALING (REACTOME)                                         | 7.88E-34 | 33.10      | 202       | 30                | 0.1485     | 5         |
| INTERFERON ALPHA BETA SIGNALING (REACTOME)                              | 7.40E-20 | 19.13      | 70        | 16                | 0.2286     | 5         |
| CYTOKINE SIGNALING IN IMMUNE SYSTEM (REACTOME)                          | 2.83E-17 | 16.55      | 856       | 32                | 0.0374     | 5         |
| NEUTROPHIL DEGRANULATION (REACTOME)                                     | 6.97E-23 | 22.16      | 478       | 21                | 0.0439     | 10        |
| INNATE IMMUNE SYSTEM (REACTOME)                                         | 6.78E-17 | 16.17      | 1104      | 22                | 0.0199     | 10        |
| CELL CYCLE (REACTOME)                                                   | 9.92E-29 | 28.00      | 642       | 37                | 0.0576     | 14        |
| CELL CYCLE MITOTIC (REACTOME)                                           | 1.21E-28 | 27.92      | 536       | 35                | 0.0653     | 14        |
| CELL CYCLE CHECKPOINTS (REACTOME)                                       | 4.20E-19 | 18.38      | 291       | 23                | 0.0790     | 14        |
| MITOTIC PROMETAPHASE (REACTOME)                                         | 2.24E-18 | 17.65      | 198       | 20                | 0.1010     | 14        |
| PARKINSONS DISEASE (KEGG)                                               | 5.03E-22 | 21.30      | 128       | 12                | 0.0938     | 48        |
| OXIDATIVE PHOSPHORYLATION (KEGG)                                        | 6.72E-22 | 21.17      | 131       | 12                | 0.0916     | 48        |
| RESPIRATORY ELECTRON TRANSPORT ATP SYNTHESIS*** (REACTOME)              | 3.46E-19 | 18.46      | 122       | 11                | 0.0902     | 48        |
| THE CITRIC ACID TCA CYCLE AND RESPIRATORY ELECTRON TRANSPORT (REACTOME) | 1.85E-17 | 16.73      | 173       | 11                | 0.0636     | 48        |

P (adj), P-value adjusted; (-log10) P, p-value on a -log10 scale; Enrichment represents ratio between intersection size and term size; \*\*\* by chemiosmotic coupling and heat production by uncoupling proteins

Supplementary Table 10. Cell types significantly associated with PD etiology based on expression specificity enrichment analyses

| Cell type                                   | DISCOVERY |          |                 | REPLICATION |          |              |
|---------------------------------------------|-----------|----------|-----------------|-------------|----------|--------------|
|                                             | Beta      | SE       | P               | Beta        | SE       | P            |
| VASCULAR LEPTOMENINGEAL CELLS               | 5.10E-06  | 1.78E-06 | 0.0244          | 2.64E-06    | 3.18E-06 | 0.434        |
| STRIATAL INTERNEURON DECIL                  | 2.57E-06  | 1.85E-06 | 0.2069          | 4.86E-06    | 2.67E-06 | 0.111        |
| RADIAL GLIA LIKE CELLS                      | 6.50E-06  | 1.14E-06 | 0.0008          | 6.08E-06    | 2.83E-06 | 0.069        |
| PYRAMIDAL SS LIKE CELLS                     | 4.04E-06  | 7.34E-07 | 0.0009          | 1.70E-06    | 2.59E-06 | 0.533        |
| PYRAMIDAL CA1                               | 2.40E-06  | 7.80E-07 | 0.0179          | 2.26E-06    | 1.86E-06 | 0.265        |
| OXYTOCIN AND VASOPRESSIN EXPRESSING NEURONS | 4.06E-06  | 1.22E-06 | 0.0126          | 3.79E-06    | 1.81E-06 | 0.075        |
| OLIGODENDROCYTES                            | 5.62E-06  | 8.08E-07 | 0.0002          | -1.06E-07   | 1.39E-06 | 0.941        |
| OLIGODENDROCYTE PRECURSOR                   | 3.88E-06  | 1.45E-06 | 0.0319          | 1.00E-06    | 2.06E-06 | 0.642        |
| INTERNEURONS                                | 1.62E-06  | 1.39E-06 | 0.2833          | -4.18E-07   | 2.44E-06 | 0.869        |
[truncated: 339,090 more chars]
